# Supplementary material
Source: MDPI journal article supplement (https://www.mdpi.com/2073-4352/11/2/179)

# checkCIF/PLATON report

Structure factors have been supplied for datablock(s) rf1615

THIS REPORT IS FOR GUIDANCE ONLY. IF USED AS PART OF A REVIEW PROCEDURE FOR PUBLICATION, IT SHOULD NOT REPLACE THE EXPERTISE OF AN EXPERIENCED CRYSTALLOGRAPHIC REFEREE.

No syntax errors found.      CIF dictionary      Interpreting this report

## Datablock: rf1615

---

|                 |                     |                                     |
|-----------------|---------------------|-------------------------------------|
| Bond precision: | C-C = 0.0034 A      | Wavelength=0.71073                  |
| Cell:           | a=11.9059(4)        | b=15.3694(5)      c=16.5675(6)      |
|                 | alpha=79.097(2)     | beta=70.308(2)      gamma=67.575(2) |
| Temperature:    | 100 K               |                                     |
|                 | Calculated          | Reported                            |
| Volume          | 2632.08(16)         | 2632.08(16)                         |
| Space group     | P -1                | P -1                                |
| Hall group      | -P 1                | -P 1                                |
| Moiety formula  | C62 H40 F9 N4 O6 Pr | C62 H40 F9 N4 O6 Pr                 |
| Sum formula     | C62 H40 F9 N4 O6 Pr | C62 H40 F9 N4 O6 Pr                 |
| Mr              | 1248.89             | 1248.89                             |
| Dx,g cm-3       | 1.576               | 1.576                               |
| Z               | 2                   | 2                                   |
| Mu (mm-1)       | 1.016               | 1.016                               |
| F000            | 1256.0              | 1256.0                              |
| F000'           | 1256.27             |                                     |
| h,k,lmax        | 15,19,21            | 15,19,21                            |
| Nref            | 11483               | 11469                               |
| Tmin,Tmax       | 0.730,0.800         | 0.701,0.842                         |
| Tmin'           | 0.715               |                                     |

Correction method= # Reported T Limits: Tmin=0.701 Tmax=0.842  
AbsCorr = MULTI-SCAN

Data completeness= 0.999      Theta(max)= 27.000

R(reflections)= 0.0276( 10457)      wR2(reflections)= 0.0728( 11469)

S = 0.991      Npar= 767

---

The following ALERTS were generated. Each ALERT has the format  
**test-name\_ALERT\_alert-type\_alert-level.**  
Click on the hyperlinks for more details of the test.

---

## 🔴 Alert level B

PLAT213\_ALERT\_2\_B Atom F8B has ADP max/min Ratio ..... 4.2 prolat

---

## 🟡 Alert level C

PLAT213\_ALERT\_2\_C Atom F2 has ADP max/min Ratio ..... 3.4 prolat  
PLAT220\_ALERT\_2\_C NonSolvent Resd 1 C Ueq(max)/Ueq(min) Range 4.1 Ratio  
PLAT234\_ALERT\_4\_C Large Hirshfeld Difference F7 --C29 . 0.16 Ang.  
PLAT234\_ALERT\_4\_C Large Hirshfeld Difference F9 --C29 . 0.16 Ang.  
PLAT242\_ALERT\_2\_C Low 'MainMol' Ueq as Compared to Neighbors of C1 Check  
PLAT910\_ALERT\_3\_C Missing # of FCF Reflection(s) Below Theta(Min). 8 Note  
PLAT911\_ALERT\_3\_C Missing FCF Refl Between Thmin & STh/L= 0.600 4 Report

---

## 🟢 Alert level G

PLAT002\_ALERT\_2\_G Number of Distance or Angle Restraints on AtSite 7 Note  
PLAT003\_ALERT\_2\_G Number of Uiso or Uij Restrained non-H Atoms ... 6 Report  
PLAT154\_ALERT\_1\_G The s.u.'s on the Cell Angles are Equal ..(Note) 0.002 Degree  
PLAT176\_ALERT\_4\_G The CIF-Embedded .res File Contains SADI Records 2 Report  
PLAT186\_ALERT\_4\_G The CIF-Embedded .res File Contains ISOR Records 1 Report  
PLAT230\_ALERT\_2\_G Hirshfeld Test Diff for F9B --C29 . 8.0 s.u.  
PLAT230\_ALERT\_2\_G Hirshfeld Test Diff for F8 --C29 . 5.5 s.u.  
PLAT301\_ALERT\_3\_G Main Residue Disorder .....(Resd 1 ) 4% Note  
PLAT432\_ALERT\_2\_G Short Inter X...Y Contact F8B ..C01R 2.88 Ang.  
1+x,y,z = 1\_655 Check  
PLAT720\_ALERT\_4\_G Number of Unusual/Non-Standard Labels ..... 6 Note  
PLAT794\_ALERT\_5\_G Tentative Bond Valency for Pr1 (III) . 3.51 Info  
PLAT860\_ALERT\_3\_G Number of Least-Squares Restraints ..... 66 Note  
PLAT883\_ALERT\_1\_G No Info/Value for \_atom\_sites\_solution\_primary . Please Do !  
PLAT912\_ALERT\_4\_G Missing # of FCF Reflections Above STh/L= 0.600 2 Note  
PLAT933\_ALERT\_2\_G Number of OMIT Records in Embedded .res File ... 3 Note  
PLAT965\_ALERT\_2\_G The SHELXL WEIGHT Optimisation has not Converged Please Check  
PLAT978\_ALERT\_2\_G Number C-C Bonds with Positive Residual Density. 7 Info

---

0 **ALERT level A** = Most likely a serious problem - resolve or explain  
1 **ALERT level B** = A potentially serious problem, consider carefully  
7 **ALERT level C** = Check. Ensure it is not caused by an omission or oversight  
17 **ALERT level G** = General information/check it is not something unexpected

2 ALERT type 1 CIF construction/syntax error, inconsistent or missing data  
12 ALERT type 2 Indicator that the structure model may be wrong or deficient  
4 ALERT type 3 Indicator that the structure quality may be low  
6 ALERT type 4 Improvement, methodology, query or suggestion  
1 ALERT type 5 Informative message, check

---

It is advisable to attempt to resolve as many as possible of the alerts in all categories. Often the minor alerts point to easily fixed oversights, errors and omissions in your CIF or refinement strategy, so attention to these fine details can be worthwhile. In order to resolve some of the more serious problems it may be necessary to carry out additional measurements or structure refinements. However, the purpose of your study may justify the reported deviations and the more serious of these should normally be commented upon in the discussion or experimental section of a paper or in the "special\_details" fields of the CIF. checkCIF was carefully designed to identify outliers and unusual parameters, but every test has its limitations and alerts that are not important in a particular case may appear. Conversely, the absence of alerts does not guarantee there are no aspects of the results needing attention. It is up to the individual to critically assess their own results and, if necessary, seek expert advice.

### **Publication of your CIF in IUCr journals**

A basic structural check has been run on your CIF. These basic checks will be run on all CIFs submitted for publication in IUCr journals (*Acta Crystallographica*, *Journal of Applied Crystallography*, *Journal of Synchrotron Radiation*); however, if you intend to submit to *Acta Crystallographica Section C* or *E* or *IUCrData*, you should make sure that full publication checks are run on the final version of your CIF prior to submission.

### **Publication of your CIF in other journals**

Please refer to the *Notes for Authors* of the relevant journal for any special instructions relating to CIF submission.

---

**PLATON version of 08/07/2020; check.def file version of 17/06/2020**

#### **Alert level B**

PLAT213\_ALERT\_2\_B Atom F8B has ADP max/min Ratio ..... 4.2 prolat

RESPONSE: Minor occupancy of disordered atom of flexible CF3 group.

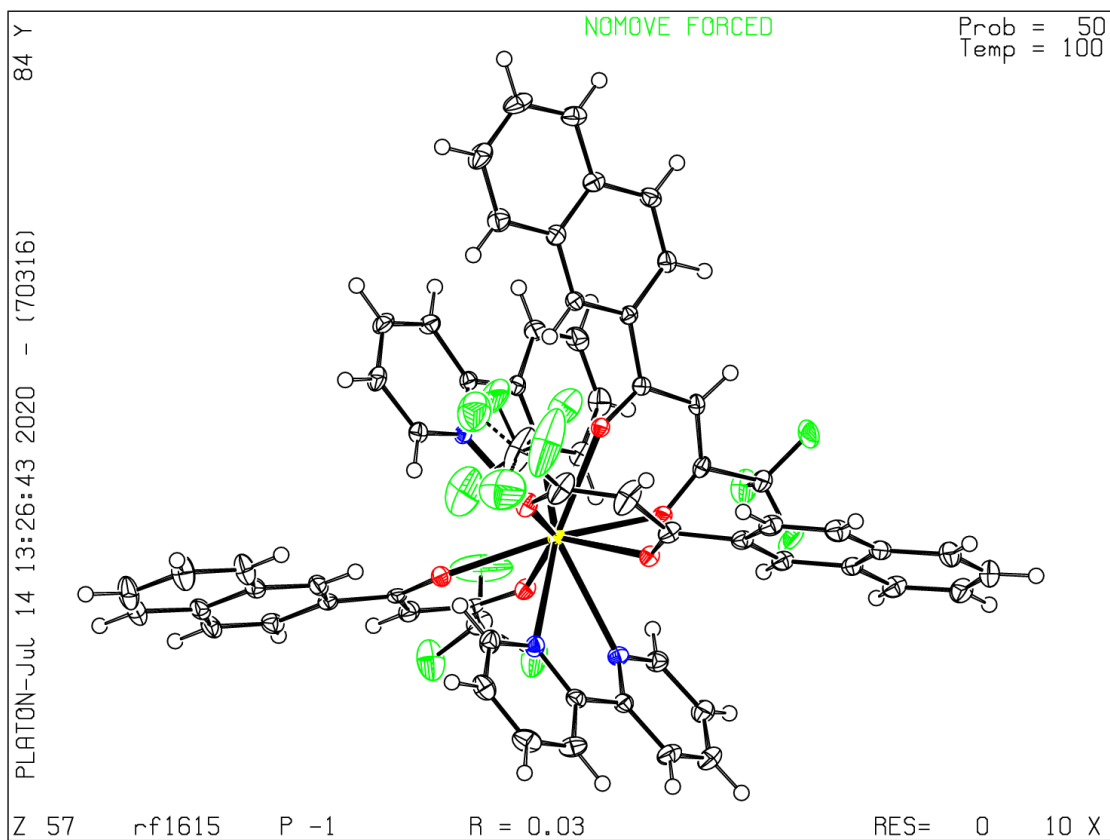

Supplement: s1 [file s1]
