# Supplementary material
Source: MDPI journal article supplement (https://www.mdpi.com/2073-4352/11/2/179)
Supplement: s1 [file s1]

Archive with 9 entries (9 files):
- 1_rf1758.cif
- 1_RF1758_PrL3(MeOH)2_HKL_checkcif.pdf
- 2_rf1615.cif
- 2_RF1615_PrL3(bipy)2_HKL_checkcif.pdf
- 3_rf1933.cif
- 3_RF1933_PrL3(4,4'-Mt2bipy)_HKL_checkcif.pdf
- 4_rf1690.cif
- 4_RF1690_PrL3(5,5'-Me2bipy)_HKL_checkcif.pdf
- SUPPLEMENTARY MATERIAL-REVISED.docx
