# Supplementary material
Source: MDPI journal article supplement (https://www.mdpi.com/2073-4352/11/2/179)
Supplement: s1 [file s1 › 1_rf1758.cif]

 
data_rf1758
 
_audit_creation_method            'SHELXL-2016/6'
_shelx_SHELXL_version_number      '2016/6'
_chemical_name_systematic         ?
_chemical_name_common             '[PrL3(MeOH)2]'
_chemical_melting_point           ?
_chemical_formula_moiety          'C44 H32 F9 O8 Pr'
_chemical_formula_sum
 'C44 H32 F9 O8 Pr' 
_chemical_formula_weight          1000.60

loop_
 _atom_type_symbol
 _atom_type_description
 _atom_type_scat_dispersion_real
 _atom_type_scat_dispersion_imag
 _atom_type_scat_source
 'C'  'C'   0.0033   0.0016
 'International Tables Vol C Tables 4.2.6.8 and 6.1.1.4'
 'H'  'H'   0.0000   0.0000
 'International Tables Vol C Tables 4.2.6.8 and 6.1.1.4'
 'O'  'O'   0.0106   0.0060
 'International Tables Vol C Tables 4.2.6.8 and 6.1.1.4'
 'F'  'F'   0.0171   0.0103
 'International Tables Vol C Tables 4.2.6.8 and 6.1.1.4'
 'Pr'  'Pr'  -0.2180   2.8214
 'International Tables Vol C Tables 4.2.6.8 and 6.1.1.4'
 
_space_group_crystal_system       monoclinic
_space_group_IT_number            14
_space_group_name_H-M_alt         'P 21/c'
_space_group_name_Hall            '-P 2ybc'
 
_shelx_space_group_comment
;
The symmetry employed for this shelxl refinement is uniquely defined
by the following loop, which should always be used as a source of
symmetry information in preference to the above space-group names.
They are only intended as comments.
;
 
loop_
 _space_group_symop_operation_xyz
 'x, y, z'
 '-x, y+1/2, -z+1/2'
 '-x, -y, -z'
 'x, -y-1/2, z-1/2'
 
_cell_length_a                    8.9307(4)
_cell_length_b                    28.9448(12)
_cell_length_c                    16.2421(7)
_cell_angle_alpha                 90
_cell_angle_beta                  105.674(2)
_cell_angle_gamma                 90
_cell_volume                      4042.4(3)
_cell_formula_units_Z             4
_cell_measurement_temperature     100(2)
_cell_measurement_reflns_used     9930
_cell_measurement_theta_min       2.37
_cell_measurement_theta_max       28.28
 
_exptl_crystal_description        prism
_exptl_crystal_colour             green
_exptl_crystal_density_meas       ?
_exptl_crystal_density_method     ?
_exptl_crystal_density_diffrn     1.644          
_exptl_crystal_F_000              2000
_exptl_transmission_factor_min    ?
_exptl_transmission_factor_max    ?
_exptl_crystal_size_max           0.180
_exptl_crystal_size_mid           0.140
_exptl_crystal_size_min           0.090
_exptl_absorpt_coefficient_mu     1.301
_shelx_estimated_absorpt_T_min    0.800
_shelx_estimated_absorpt_T_max    0.892
_exptl_absorpt_correction_type    multi-scan
_exptl_absorpt_correction_T_min   0.7758
_exptl_absorpt_correction_T_max   0.9326
_exptl_absorpt_process_details    'SADABS'
_exptl_absorpt_special_details    ?
_diffrn_ambient_temperature       100(2)
_diffrn_radiation_wavelength      0.71073
_diffrn_radiation_type            MoK\a
_diffrn_source                    ?
_diffrn_measurement_device_type   'Bruker APEX-II CCD'
_diffrn_measurement_method        '\w-scans'
_diffrn_detector_area_resol_mean  ?
_diffrn_reflns_number             185055
_diffrn_reflns_av_unetI/netI      0.0380
_diffrn_reflns_av_R_equivalents   0.0797
_diffrn_reflns_limit_h_min        -12
_diffrn_reflns_limit_h_max        12
_diffrn_reflns_limit_k_min        -40
_diffrn_reflns_limit_k_max        39
_diffrn_reflns_limit_l_min        -22
_diffrn_reflns_limit_l_max        22
_diffrn_reflns_theta_min          2.369
_diffrn_reflns_theta_max          30.110
_diffrn_reflns_theta_full         25.242
_diffrn_measured_fraction_theta_max   0.994
_diffrn_measured_fraction_theta_full  1.000
_diffrn_reflns_Laue_measured_fraction_max    0.994
_diffrn_reflns_Laue_measured_fraction_full   1.000
_diffrn_reflns_point_group_measured_fraction_max   0.994
_diffrn_reflns_point_group_measured_fraction_full  1.000
_reflns_number_total              11826
_reflns_number_gt                 10371
_reflns_threshold_expression      'I > 2\s(I)'
_reflns_Friedel_coverage          0.000
_reflns_Friedel_fraction_max      .
_reflns_Friedel_fraction_full     .
 
_reflns_special_details
;
 Reflections were merged by SHELXL according to the crystal
 class for the calculation of statistics and refinement.
 
 _reflns_Friedel_fraction is defined as the number of unique
 Friedel pairs measured divided by the number that would be
 possible theoretically, ignoring centric projections and
 systematic absences.
;
 
_computing_data_collection        'Bruker APEX2'
_computing_cell_refinement        'Bruker SAINT'
_computing_data_reduction         'Bruker SAINT'
_computing_structure_solution     ?
_computing_structure_refinement 'SHELXL-2016/6 (Sheldrick, 2016)'
_computing_molecular_graphics     'Bruker SHELXTL'
_computing_publication_material   'Bruker SHELXTL'
_refine_special_details           ?
_refine_ls_structure_factor_coef  Fsqd
_refine_ls_matrix_type            full
_refine_ls_weighting_scheme       calc
_refine_ls_weighting_details
'w=1/[\s^2^(Fo^2^)+(0.0105P)^2^+10.3624P] where P=(Fo^2^+2Fc^2^)/3'
_atom_sites_solution_primary      ?
_atom_sites_solution_secondary    ?
_atom_sites_solution_hydrogens    mixed
_refine_ls_hydrogen_treatment     mixed
_refine_ls_extinction_method      none
_refine_ls_extinction_coef        .
_refine_ls_number_reflns          11826
_refine_ls_number_parameters      567
_refine_ls_number_restraints      0
_refine_ls_R_factor_all           0.0533
_refine_ls_R_factor_gt            0.0437
_refine_ls_wR_factor_ref          0.0853
_refine_ls_wR_factor_gt           0.0829
_refine_ls_goodness_of_fit_ref    1.243
_refine_ls_restrained_S_all       1.243
_refine_ls_shift/su_max           0.003
_refine_ls_shift/su_mean          0.000
 
loop_
 _atom_site_label
 _atom_site_type_symbol
 _atom_site_fract_x
 _atom_site_fract_y
 _atom_site_fract_z
 _atom_site_U_iso_or_equiv
 _atom_site_adp_type
 _atom_site_occupancy
 _atom_site_site_symmetry_order  
 _atom_site_calc_flag
 _atom_site_refinement_flags_posn
 _atom_site_refinement_flags_adp
 _atom_site_refinement_flags_occupancy
 _atom_site_disorder_assembly
 _atom_site_disorder_group
Pr1 Pr 0.46423(2) 0.54023(2) 0.64779(2) 0.01175(4) Uani 1 1 d . . . . .
H1O H 0.386(4) 0.4558(13) 0.540(2) 0.018 Uiso 1 1 d . U . . .
C1 C 0.7334(4) 0.44853(11) 0.8709(2) 0.0202(7) Uani 1 1 d . . . . .
F1 F 0.7833(3) 0.45086(7) 0.95631(12) 0.0349(5) Uani 1 1 d . . . . .
O1 O 0.6443(3) 0.49176(8) 0.74657(13) 0.0170(4) Uani 1 1 d . . . . .
F2 F 0.8443(2) 0.42651(7) 0.84526(14) 0.0293(5) Uani 1 1 d . . . . .
H2O H 0.709(6) 0.5064(17) 0.576(3) 0.044 Uiso 1 1 d . U . . .
C2 C 0.6975(3) 0.49546(11) 0.82698(19) 0.0146(6) Uani 1 1 d . . . . .
O2 O 0.6154(3) 0.58662(7) 0.76455(13) 0.0183(5) Uani 1 1 d . . . . .
F3 F 0.6082(3) 0.42134(7) 0.85167(14) 0.0317(5) Uani 1 1 d . . . . .
C3 C 0.7279(4) 0.53474(11) 0.87602(18) 0.0171(6) Uani 1 1 d . . . . .
H3 H 0.770198 0.531775 0.936077 0.021 Uiso 1 1 calc R U . . .
O3 O 0.3163(3) 0.50704(8) 0.73692(14) 0.0191(5) Uani 1 1 d . . . . .
O4 O 0.2851(3) 0.59541(8) 0.67449(14) 0.0175(4) Uani 1 1 d . . . . .
F4 F 0.0930(2) 0.50146(7) 0.88209(14) 0.0287(5) Uani 1 1 d . . . . .
C4 C 0.6986(3) 0.57946(11) 0.84027(18) 0.0149(6) Uani 1 1 d . . . . .
F5 F 0.3372(2) 0.48593(7) 0.91629(12) 0.0275(5) Uani 1 1 d . . . . .
C5 C 0.7701(3) 0.62049(11) 0.89066(18) 0.0138(6) Uani 1 1 d . . . . .
O5 O 0.2849(2) 0.54849(7) 0.50393(13) 0.0146(4) Uani 1 1 d . . . . .
F6 F 0.1795(3) 0.44718(7) 0.81717(13) 0.0286(5) Uani 1 1 d . . . . .
C6 C 0.7045(3) 0.66342(10) 0.86925(18) 0.0143(6) Uani 1 1 d . . . . .
H6 H 0.611541 0.666090 0.824209 0.017 Uiso 1 1 calc R U . . .
O6 O 0.5157(2) 0.61159(7) 0.57870(13) 0.0153(4) Uani 1 1 d . . . . .
F8 F 0.0748(3) 0.55426(9) 0.34195(14) 0.0404(6) Uani 1 1 d . . . . .
O8 O 0.6989(3) 0.52956(7) 0.58494(14) 0.0159(4) Uani 1 1 d . . . . .
C8 C 0.7092(4) 0.74807(11) 0.8913(2) 0.0177(6) Uani 1 1 d . . . . .
H8 H 0.613467 0.751311 0.848480 0.021 Uiso 1 1 calc R U . . .
F7 F -0.0313(2) 0.55338(9) 0.44508(16) 0.0419(6) Uani 1 1 d . . . . .
O7 O 0.4189(3) 0.46036(8) 0.58796(14) 0.0195(5) Uani 1 1 d . . . . .
C7 C 0.7730(3) 0.70345(10) 0.91304(18) 0.0135(5) Uani 1 1 d . . . . .
F9 F -0.0170(2) 0.61637(7) 0.37837(14) 0.0307(5) Uani 1 1 d . . . . .
C9 C 0.7835(4) 0.78640(11) 0.9312(2) 0.0218(7) Uani 1 1 d . . . . .
H9 H 0.739602 0.816084 0.915627 0.026 Uiso 1 1 calc R U . . .
C10 C 0.9259(4) 0.78226(12) 0.9957(2) 0.0248(7) Uani 1 1 d . . . . .
H10 H 0.977522 0.809190 1.022614 0.030 Uiso 1 1 calc R U . . .
C11 C 0.9891(4) 0.73993(12) 1.0192(2) 0.0199(6) Uani 1 1 d . . . . .
H11 H 1.083700 0.737560 1.063103 0.024 Uiso 1 1 calc R U . . .
C12 C 0.9153(3) 0.69916(11) 0.97882(19) 0.0155(6) Uani 1 1 d . . . . .
C13 C 0.9791(4) 0.65478(11) 1.00068(19) 0.0177(6) Uani 1 1 d . . . . .
H13 H 1.072695 0.651609 1.045146 0.021 Uiso 1 1 calc R U . . .
C15 C 0.2101(4) 0.48936(11) 0.8504(2) 0.0189(6) Uani 1 1 d . . . . .
C14 C 0.9083(4) 0.61621(11) 0.95889(19) 0.0189(6) Uani 1 1 d . . . . .
H14 H 0.951465 0.586535 0.975453 0.023 Uiso 1 1 calc R U . . .
C16 C 0.2396(3) 0.52418(11) 0.78436(19) 0.0150(6) Uani 1 1 d . . . . .
C17 C 0.1875(3) 0.56890(10) 0.78717(19) 0.0156(6) Uani 1 1 d . . . . .
H17 H 0.130727 0.576698 0.826937 0.019 Uiso 1 1 calc R U . . .
C19 C 0.1749(3) 0.65256(10) 0.74203(18) 0.0138(6) Uani 1 1 d . . . . .
C18 C 0.2174(3) 0.60336(10) 0.73168(18) 0.0126(5) Uani 1 1 d . . . . .
C20 C 0.2677(3) 0.68619(10) 0.72127(18) 0.0138(6) Uani 1 1 d . . . . .
H20 H 0.351418 0.677358 0.698937 0.017 Uiso 1 1 calc R U . . .
C21 C 0.2408(3) 0.73338(10) 0.73254(18) 0.0138(6) Uani 1 1 d . . . . .
C22 C 0.3367(4) 0.76847(11) 0.71270(19) 0.0180(6) Uani 1 1 d . . . . .
H22 H 0.422966 0.760226 0.692035 0.022 Uiso 1 1 calc R U . . .
C23 C 0.3058(4) 0.81396(11) 0.7231(2) 0.0229(7) Uani 1 1 d . . . . .
H23 H 0.371031 0.837107 0.709868 0.028 Uiso 1 1 calc R U . . .
C24 C 0.1778(4) 0.82694(11) 0.7535(2) 0.0234(7) Uani 1 1 d . . . . .
H24 H 0.156859 0.858725 0.759835 0.028 Uiso 1 1 calc R U . . .
C25 C 0.0837(4) 0.79389(12) 0.7738(2) 0.0215(7) Uani 1 1 d . . . . .
H25 H -0.001331 0.802930 0.794871 0.026 Uiso 1 1 calc R U . . .
C26 C 0.1123(3) 0.74640(11) 0.76363(18) 0.0155(6) Uani 1 1 d . . . . .
C27 C 0.0176(4) 0.71105(11) 0.78292(19) 0.0172(6) Uani 1 1 d . . . . .
H27 H -0.069296 0.719359 0.802997 0.021 Uiso 1 1 calc R U . . .
C28 C 0.0473(3) 0.66532(11) 0.77353(19) 0.0161(6) Uani 1 1 d . . . . .
H28 H -0.016917 0.642270 0.787993 0.019 Uiso 1 1 calc R U . . .
C29 C 0.0594(4) 0.57821(11) 0.4094(2) 0.0189(6) Uani 1 1 d . . . . .
C30 C 0.2190(3) 0.58634(11) 0.47196(18) 0.0146(6) Uani 1 1 d . . . . .
C31 C 0.2725(3) 0.63053(10) 0.48508(19) 0.0153(6) Uani 1 1 d . . . . .
H31 H 0.206369 0.654912 0.457721 0.018 Uiso 1 1 calc R U . . .
C32 C 0.4245(3) 0.64198(10) 0.53843(18) 0.0135(6) Uani 1 1 d . . . . .
C33 C 0.4791(3) 0.69066(10) 0.54776(19) 0.0137(6) Uani 1 1 d . . . . .
C34 C 0.3963(3) 0.72649(10) 0.50086(19) 0.0146(6) Uani 1 1 d . . . . .
H34 H 0.300849 0.720234 0.459410 0.018 Uiso 1 1 calc R U . . .
C35 C 0.4516(3) 0.77266(10) 0.51361(19) 0.0141(6) Uani 1 1 d . . . . .
C36 C 0.3671(4) 0.80995(11) 0.4664(2) 0.0178(6) Uani 1 1 d . . . . .
H36 H 0.271816 0.804212 0.424502 0.021 Uiso 1 1 calc R U . . .
C37 C 0.4220(4) 0.85417(11) 0.4809(2) 0.0215(7) Uani 1 1 d . . . . .
H37 H 0.364499 0.878955 0.449108 0.026 Uiso 1 1 calc R U . . .
C38 C 0.5634(4) 0.86319(11) 0.5428(2) 0.0204(6) Uani 1 1 d . . . . .
H38 H 0.600278 0.894041 0.552293 0.024 Uiso 1 1 calc R U . . .
C39 C 0.6474(4) 0.82819(11) 0.5890(2) 0.0178(6) Uani 1 1 d . . . . .
H39 H 0.742621 0.834775 0.630409 0.021 Uiso 1 1 calc R U . . .
C40 C 0.5942(3) 0.78203(11) 0.57586(19) 0.0151(6) Uani 1 1 d . . . . .
C41 C 0.6771(4) 0.74436(11) 0.6229(2) 0.0176(6) Uani 1 1 d . . . . .
H41 H 0.773162 0.750031 0.664255 0.021 Uiso 1 1 calc R U . . .
C42 C 0.6224(4) 0.70030(11) 0.6102(2) 0.0170(6) Uani 1 1 d . . . . .
H42 H 0.679729 0.675813 0.643107 0.020 Uiso 1 1 calc R U . . .
C43 C 0.4298(4) 0.41730(11) 0.6323(2) 0.0248(7) Uani 1 1 d . . . . .
H43A H 0.355488 0.395318 0.597569 0.037 Uiso 1 1 calc R U . . .
H43B H 0.405758 0.422049 0.687077 0.037 Uiso 1 1 calc R U . . .
H43C H 0.535455 0.405013 0.642531 0.037 Uiso 1 1 calc R U . . .
C44 C 0.8428(4) 0.55111(12) 0.6321(2) 0.0253(7) Uani 1 1 d . . . . .
H44A H 0.922535 0.546210 0.601694 0.038 Uiso 1 1 calc R U . . .
H44B H 0.877291 0.537379 0.689243 0.038 Uiso 1 1 calc R U . . .
H44C H 0.826016 0.584320 0.637203 0.038 Uiso 1 1 calc R U . . .
 
loop_
 _atom_site_aniso_label
 _atom_site_aniso_U_11
 _atom_site_aniso_U_22
 _atom_site_aniso_U_33
 _atom_site_aniso_U_23
 _atom_site_aniso_U_13
 _atom_site_aniso_U_12
Pr1 0.01512(7) 0.01058(7) 0.00840(7) 0.00055(6) 0.00122(5) 0.00102(6)
C1 0.0269(17) 0.0173(16) 0.0147(14) 0.0033(12) 0.0029(12) 0.0035(12)
F1 0.0626(15) 0.0218(11) 0.0138(9) 0.0044(8) -0.0009(9) 0.0102(10)
O1 0.0200(11) 0.0175(11) 0.0117(10) 0.0011(8) 0.0009(8) 0.0044(9)
F2 0.0339(12) 0.0185(10) 0.0345(12) 0.0028(9) 0.0076(9) 0.0116(9)
C2 0.0142(13) 0.0162(14) 0.0145(13) 0.0015(11) 0.0057(11) 0.0036(11)
O2 0.0250(12) 0.0141(11) 0.0116(10) 0.0000(8) -0.0025(9) 0.0005(9)
F3 0.0356(12) 0.0221(11) 0.0354(12) 0.0104(9) 0.0060(10) -0.0074(9)
C3 0.0218(15) 0.0179(15) 0.0103(12) 0.0020(11) 0.0022(11) 0.0015(12)
O3 0.0246(12) 0.0173(11) 0.0176(11) 0.0012(9) 0.0094(9) 0.0008(9)
O4 0.0221(11) 0.0166(11) 0.0156(10) 0.0022(8) 0.0081(9) 0.0048(9)
F4 0.0326(11) 0.0248(11) 0.0357(12) 0.0082(9) 0.0215(9) 0.0014(9)
C4 0.0146(14) 0.0186(15) 0.0115(13) -0.0001(11) 0.0037(11) 0.0016(11)
F5 0.0290(11) 0.0315(11) 0.0177(9) 0.0100(8) -0.0013(8) 0.0011(9)
C5 0.0137(13) 0.0178(14) 0.0099(12) -0.0003(11) 0.0029(10) 0.0000(11)
O5 0.0184(10) 0.0101(10) 0.0133(9) 0.0007(8) 0.0011(8) 0.0023(8)
F6 0.0431(13) 0.0169(10) 0.0282(11) 0.0017(8) 0.0137(9) -0.0075(9)
C6 0.0115(13) 0.0181(15) 0.0127(13) 0.0000(11) 0.0023(10) -0.0004(11)
O6 0.0149(10) 0.0142(10) 0.0159(10) 0.0038(8) 0.0024(8) 0.0022(8)
F8 0.0352(13) 0.0471(14) 0.0270(11) -0.0165(10) -0.0122(10) 0.0111(10)
O8 0.0169(10) 0.0138(11) 0.0153(10) -0.0035(8) 0.0014(8) -0.0007(8)
C8 0.0171(14) 0.0185(15) 0.0185(14) 0.0010(12) 0.0067(12) 0.0019(12)
F7 0.0210(11) 0.0489(15) 0.0490(14) 0.0228(12) -0.0021(10) -0.0145(10)
O7 0.0291(12) 0.0144(10) 0.0130(10) -0.0005(9) 0.0019(9) -0.0045(10)
C7 0.0139(13) 0.0150(14) 0.0131(13) 0.0003(11) 0.0064(11) -0.0010(11)
F9 0.0204(10) 0.0194(10) 0.0413(12) 0.0077(9) -0.0108(9) 0.0024(8)
C9 0.0258(17) 0.0149(15) 0.0271(17) -0.0004(13) 0.0115(14) -0.0013(13)
C10 0.0258(17) 0.0207(17) 0.0290(18) -0.0066(14) 0.0091(14) -0.0087(14)
C11 0.0167(15) 0.0254(17) 0.0172(15) -0.0040(13) 0.0041(12) -0.0056(13)
C12 0.0144(14) 0.0198(15) 0.0128(13) -0.0027(11) 0.0046(11) -0.0016(11)
C13 0.0135(14) 0.0236(16) 0.0127(13) 0.0001(12) -0.0021(11) 0.0007(12)
C15 0.0201(15) 0.0206(16) 0.0159(14) 0.0010(12) 0.0048(12) -0.0025(12)
C14 0.0205(15) 0.0204(16) 0.0144(14) 0.0020(12) 0.0023(12) 0.0030(12)
C16 0.0134(13) 0.0166(14) 0.0133(13) 0.0026(11) 0.0008(11) -0.0040(11)
C17 0.0160(14) 0.0151(14) 0.0150(14) -0.0005(11) 0.0032(11) -0.0016(11)
C19 0.0124(13) 0.0164(14) 0.0117(13) 0.0017(11) 0.0020(10) 0.0032(11)
C18 0.0107(12) 0.0148(14) 0.0109(12) -0.0014(11) 0.0005(10) -0.0002(10)
C20 0.0127(13) 0.0183(15) 0.0100(12) 0.0023(11) 0.0025(10) 0.0012(11)
C21 0.0154(14) 0.0160(14) 0.0085(12) 0.0002(10) 0.0007(10) 0.0017(11)
C22 0.0202(15) 0.0193(15) 0.0144(14) 0.0011(12) 0.0043(12) -0.0008(12)
C23 0.0298(18) 0.0168(16) 0.0211(16) 0.0036(13) 0.0050(14) -0.0033(13)
C24 0.0362(19) 0.0140(15) 0.0189(15) 0.0005(12) 0.0056(14) 0.0048(14)
C25 0.0266(17) 0.0215(16) 0.0166(15) 0.0020(12) 0.0061(13) 0.0098(13)
C26 0.0158(14) 0.0196(15) 0.0099(13) 0.0013(11) 0.0012(11) 0.0047(12)
C27 0.0173(14) 0.0229(16) 0.0135(13) 0.0036(12) 0.0075(11) 0.0063(12)
C28 0.0141(14) 0.0192(15) 0.0146(14) 0.0050(11) 0.0032(11) 0.0006(11)
C29 0.0154(14) 0.0162(15) 0.0218(15) 0.0019(12) -0.0009(12) -0.0002(12)
C30 0.0140(13) 0.0188(15) 0.0105(13) 0.0015(11) 0.0025(11) 0.0013(11)
C31 0.0163(14) 0.0136(14) 0.0143(13) 0.0054(11) 0.0013(11) 0.0011(11)
C32 0.0150(14) 0.0145(14) 0.0122(13) 0.0025(11) 0.0059(11) 0.0004(11)
C33 0.0139(13) 0.0132(14) 0.0149(13) 0.0008(11) 0.0052(11) 0.0003(11)
C34 0.0130(13) 0.0152(14) 0.0147(13) 0.0006(11) 0.0020(11) -0.0006(11)
C35 0.0143(13) 0.0146(14) 0.0138(13) 0.0007(11) 0.0046(11) 0.0001(11)
C36 0.0179(15) 0.0182(15) 0.0160(14) 0.0015(12) 0.0025(12) 0.0018(12)
C37 0.0261(17) 0.0171(16) 0.0215(16) 0.0016(12) 0.0065(13) 0.0027(13)
C38 0.0262(17) 0.0152(15) 0.0221(16) -0.0041(12) 0.0104(13) -0.0034(12)
C39 0.0167(14) 0.0190(15) 0.0181(15) -0.0037(12) 0.0056(12) -0.0038(12)
C40 0.0152(14) 0.0182(15) 0.0138(13) -0.0023(11) 0.0070(11) -0.0007(11)
C41 0.0131(13) 0.0224(16) 0.0166(14) -0.0014(12) 0.0030(11) -0.0013(12)
C42 0.0147(14) 0.0175(15) 0.0177(14) 0.0025(12) 0.0024(11) 0.0014(11)
C43 0.034(2) 0.0159(16) 0.0225(17) 0.0024(13) 0.0053(14) 0.0004(14)
C44 0.0185(16) 0.0271(18) 0.0292(18) -0.0096(14) 0.0046(13) -0.0072(13)
 
_geom_special_details
;
 All esds (except the esd in the dihedral angle between two l.s. planes)
 are estimated using the full covariance matrix.  The cell esds are taken
 into account individually in the estimation of esds in distances, angles
 and torsion angles; correlations between esds in cell parameters are only
 used when they are defined by crystal symmetry.  An approximate (isotropic)
 treatment of cell esds is used for estimating esds involving l.s. planes.
;
 
loop_
 _geom_bond_atom_site_label_1
 _geom_bond_atom_site_label_2
 _geom_bond_distance
 _geom_bond_site_symmetry_2
 _geom_bond_publ_flag
Pr1 O4 2.382(2) . ?
Pr1 O1 2.395(2) . ?
Pr1 O3 2.408(2) . ?
Pr1 O2 2.416(2) . ?
Pr1 O6 2.453(2) . ?
Pr1 O5 2.462(2) . ?
Pr1 O7 2.498(2) . ?
Pr1 O8 2.586(2) . ?
C1 F3 1.333(4) . ?
C1 F2 1.336(4) . ?
C1 F1 1.339(4) . ?
C1 C2 1.527(4) . ?
O1 C2 1.268(4) . ?
C2 C3 1.372(4) . ?
O2 C4 1.271(4) . ?
C3 C4 1.414(4) . ?
C3 H3 0.9500 . ?
O3 C16 1.262(4) . ?
O4 C18 1.259(4) . ?
F4 C15 1.332(4) . ?
C4 C5 1.485(4) . ?
F5 C15 1.337(4) . ?
C5 C6 1.378(4) . ?
C5 C14 1.424(4) . ?
O5 C30 1.285(4) . ?
F6 C15 1.333(4) . ?
C6 C7 1.410(4) . ?
C6 H6 0.9500 . ?
O6 C32 1.256(3) . ?
F8 C29 1.334(4) . ?
O8 C44 1.447(4) . ?
O8 H2O 0.70(5) . ?
C8 C9 1.363(4) . ?
C8 C7 1.417(4) . ?
C8 H8 0.9500 . ?
F7 C29 1.328(4) . ?
O7 C43 1.429(4) . ?
O7 H1O 0.76(4) . ?
C7 C12 1.428(4) . ?
F9 C29 1.324(4) . ?
C9 C10 1.418(5) . ?
C9 H9 0.9500 . ?
C10 C11 1.359(5) . ?
C10 H10 0.9500 . ?
C11 C12 1.422(4) . ?
C11 H11 0.9500 . ?
C12 C13 1.411(4) . ?
C13 C14 1.369(4) . ?
C13 H13 0.9500 . ?
C15 C16 1.545(4) . ?
C14 H14 0.9500 . ?
C16 C17 1.380(4) . ?
C17 C18 1.417(4) . ?
C17 H17 0.9500 . ?
C19 C20 1.378(4) . ?
C19 C28 1.418(4) . ?
C19 C18 1.495(4) . ?
C20 C21 1.407(4) . ?
C20 H20 0.9500 . ?
C21 C22 1.421(4) . ?
C21 C26 1.424(4) . ?
C22 C23 1.365(5) . ?
C22 H22 0.9500 . ?
C23 C24 1.412(5) . ?
C23 H23 0.9500 . ?
C24 C25 1.372(5) . ?
C24 H24 0.9500 . ?
C25 C26 1.416(4) . ?
C25 H25 0.9500 . ?
C26 C27 1.415(4) . ?
C27 C28 1.367(4) . ?
C27 H27 0.9500 . ?
C28 H28 0.9500 . ?
C29 C30 1.529(4) . ?
C30 C31 1.362(4) . ?
C31 C32 1.438(4) . ?
C31 H31 0.9500 . ?
C32 C33 1.485(4) . ?
C33 C34 1.378(4) . ?
C33 C42 1.429(4) . ?
C34 C35 1.420(4) . ?
C34 H34 0.9500 . ?
C35 C36 1.418(4) . ?
C35 C40 1.422(4) . ?
C36 C37 1.368(5) . ?
C36 H36 0.9500 . ?
C37 C38 1.409(5) . ?
C37 H37 0.9500 . ?
C38 C39 1.360(5) . ?
C38 H38 0.9500 . ?
C39 C40 1.415(4) . ?
C39 H39 0.9500 . ?
C40 C41 1.420(4) . ?
C41 C42 1.361(4) . ?
C41 H41 0.9500 . ?
C42 H42 0.9500 . ?
C43 H43A 0.9800 . ?
C43 H43B 0.9800 . ?
C43 H43C 0.9800 . ?
C44 H44A 0.9800 . ?
C44 H44B 0.9800 . ?
C44 H44C 0.9800 . ?
 
loop_
 _geom_angle_atom_site_label_1
 _geom_angle_atom_site_label_2
 _geom_angle_atom_site_label_3
 _geom_angle
 _geom_angle_site_symmetry_1
 _geom_angle_site_symmetry_3
 _geom_angle_publ_flag
O4 Pr1 O1 129.30(7) . . ?
O4 Pr1 O3 69.72(7) . . ?
O1 Pr1 O3 75.03(8) . . ?
O4 Pr1 O2 75.21(8) . . ?
O1 Pr1 O2 70.62(7) . . ?
O3 Pr1 O2 91.76(8) . . ?
O4 Pr1 O6 74.74(7) . . ?
O1 Pr1 O6 128.68(7) . . ?
O3 Pr1 O6 144.31(7) . . ?
O2 Pr1 O6 75.94(7) . . ?
O4 Pr1 O5 79.11(7) . . ?
O1 Pr1 O5 147.11(7) . . ?
O3 Pr1 O5 106.70(7) . . ?
O2 Pr1 O5 140.65(7) . . ?
O6 Pr1 O5 68.79(7) . . ?
O4 Pr1 O7 130.17(8) . . ?
O1 Pr1 O7 74.18(7) . . ?
O3 Pr1 O7 78.87(8) . . ?
O2 Pr1 O7 144.79(7) . . ?
O6 Pr1 O7 129.21(7) . . ?
O5 Pr1 O7 74.04(7) . . ?
O4 Pr1 O8 143.90(7) . . ?
O1 Pr1 O8 74.05(7) . . ?
O3 Pr1 O8 145.55(7) . . ?
O2 Pr1 O8 92.05(7) . . ?
O6 Pr1 O8 69.38(7) . . ?
O5 Pr1 O8 91.47(7) . . ?
O7 Pr1 O8 78.43(7) . . ?
F3 C1 F2 106.9(3) . . ?
F3 C1 F1 107.2(3) . . ?
F2 C1 F1 106.2(3) . . ?
F3 C1 C2 111.0(3) . . ?
F2 C1 C2 111.0(3) . . ?
F1 C1 C2 114.1(3) . . ?
C2 O1 Pr1 129.60(19) . . ?
O1 C2 C3 128.9(3) . . ?
O1 C2 C1 112.3(3) . . ?
C3 C2 C1 118.8(3) . . ?
C4 O2 Pr1 136.5(2) . . ?
C2 C3 C4 122.3(3) . . ?
C2 C3 H3 118.9 . . ?
C4 C3 H3 118.9 . . ?
C16 O3 Pr1 133.3(2) . . ?
C18 O4 Pr1 137.48(19) . . ?
O2 C4 C3 122.8(3) . . ?
O2 C4 C5 117.1(3) . . ?
C3 C4 C5 120.1(3) . . ?
C6 C5 C14 119.7(3) . . ?
C6 C5 C4 119.5(3) . . ?
C14 C5 C4 120.8(3) . . ?
C30 O5 Pr1 125.17(18) . . ?
C5 C6 C7 121.1(3) . . ?
C5 C6 H6 119.4 . . ?
C7 C6 H6 119.4 . . ?
C32 O6 Pr1 130.75(19) . . ?
C44 O8 Pr1 115.99(18) . . ?
C44 O8 H2O 113(4) . . ?
Pr1 O8 H2O 111(4) . . ?
C9 C8 C7 120.8(3) . . ?
C9 C8 H8 119.6 . . ?
C7 C8 H8 119.6 . . ?
C43 O7 Pr1 129.00(19) . . ?
C43 O7 H1O 108(3) . . ?
Pr1 O7 H1O 122(3) . . ?
C6 C7 C8 122.2(3) . . ?
C6 C7 C12 118.9(3) . . ?
C8 C7 C12 118.8(3) . . ?
C8 C9 C10 120.4(3) . . ?
C8 C9 H9 119.8 . . ?
C10 C9 H9 119.8 . . ?
C11 C10 C9 120.3(3) . . ?
C11 C10 H10 119.8 . . ?
C9 C10 H10 119.8 . . ?
C10 C11 C12 120.9(3) . . ?
C10 C11 H11 119.6 . . ?
C12 C11 H11 119.6 . . ?
C13 C12 C11 122.3(3) . . ?
C13 C12 C7 119.0(3) . . ?
C11 C12 C7 118.7(3) . . ?
C14 C13 C12 121.1(3) . . ?
C14 C13 H13 119.4 . . ?
C12 C13 H13 119.4 . . ?
F4 C15 F6 107.5(3) . . ?
F4 C15 F5 107.2(3) . . ?
F6 C15 F5 107.0(3) . . ?
F4 C15 C16 113.3(3) . . ?
F6 C15 C16 111.8(3) . . ?
F5 C15 C16 109.7(3) . . ?
C13 C14 C5 120.1(3) . . ?
C13 C14 H14 119.9 . . ?
C5 C14 H14 119.9 . . ?
O3 C16 C17 129.2(3) . . ?
O3 C16 C15 112.9(3) . . ?
C17 C16 C15 117.8(3) . . ?
C16 C17 C18 121.1(3) . . ?
C16 C17 H17 119.5 . . ?
C18 C17 H17 119.5 . . ?
C20 C19 C28 119.9(3) . . ?
C20 C19 C18 117.3(3) . . ?
C28 C19 C18 122.8(3) . . ?
O4 C18 C17 123.4(3) . . ?
O4 C18 C19 116.4(3) . . ?
C17 C18 C19 120.1(3) . . ?
C19 C20 C21 121.2(3) . . ?
C19 C20 H20 119.4 . . ?
C21 C20 H20 119.4 . . ?
C20 C21 C22 122.0(3) . . ?
C20 C21 C26 119.0(3) . . ?
C22 C21 C26 119.0(3) . . ?
C23 C22 C21 120.4(3) . . ?
C23 C22 H22 119.8 . . ?
C21 C22 H22 119.8 . . ?
C22 C23 C24 120.7(3) . . ?
C22 C23 H23 119.7 . . ?
C24 C23 H23 119.7 . . ?
C25 C24 C23 120.3(3) . . ?
C25 C24 H24 119.8 . . ?
C23 C24 H24 119.8 . . ?
C24 C25 C26 120.5(3) . . ?
C24 C25 H25 119.7 . . ?
C26 C25 H25 119.7 . . ?
C25 C26 C27 122.6(3) . . ?
C25 C26 C21 119.1(3) . . ?
C27 C26 C21 118.3(3) . . ?
C28 C27 C26 122.0(3) . . ?
C28 C27 H27 119.0 . . ?
C26 C27 H27 119.0 . . ?
C27 C28 C19 119.5(3) . . ?
C27 C28 H28 120.3 . . ?
C19 C28 H28 120.3 . . ?
F9 C29 F7 107.8(3) . . ?
F9 C29 F8 106.1(3) . . ?
F7 C29 F8 106.7(3) . . ?
F9 C29 C30 114.6(3) . . ?
F7 C29 C30 111.2(3) . . ?
F8 C29 C30 110.0(3) . . ?
O5 C30 C31 129.4(3) . . ?
O5 C30 C29 112.4(3) . . ?
C31 C30 C29 118.2(3) . . ?
C30 C31 C32 123.0(3) . . ?
C30 C31 H31 118.5 . . ?
C32 C31 H31 118.5 . . ?
O6 C32 C31 121.8(3) . . ?
O6 C32 C33 117.5(3) . . ?
C31 C32 C33 120.7(3) . . ?
C34 C33 C42 119.3(3) . . ?
C34 C33 C32 123.0(3) . . ?
C42 C33 C32 117.6(3) . . ?
C33 C34 C35 120.9(3) . . ?
C33 C34 H34 119.5 . . ?
C35 C34 H34 119.5 . . ?
C36 C35 C34 121.6(3) . . ?
C36 C35 C40 118.9(3) . . ?
C34 C35 C40 119.5(3) . . ?
C37 C36 C35 120.4(3) . . ?
C37 C36 H36 119.8 . . ?
C35 C36 H36 119.8 . . ?
C36 C37 C38 120.4(3) . . ?
C36 C37 H37 119.8 . . ?
C38 C37 H37 119.8 . . ?
C39 C38 C37 120.7(3) . . ?
C39 C38 H38 119.7 . . ?
C37 C38 H38 119.7 . . ?
C38 C39 C40 120.5(3) . . ?
C38 C39 H39 119.8 . . ?
C40 C39 H39 119.8 . . ?
C39 C40 C41 122.6(3) . . ?
C39 C40 C35 119.2(3) . . ?
C41 C40 C35 118.2(3) . . ?
C42 C41 C40 121.6(3) . . ?
C42 C41 H41 119.2 . . ?
C40 C41 H41 119.2 . . ?
C41 C42 C33 120.4(3) . . ?
C41 C42 H42 119.8 . . ?
C33 C42 H42 119.8 . . ?
O7 C43 H43A 109.5 . . ?
O7 C43 H43B 109.5 . . ?
H43A C43 H43B 109.5 . . ?
O7 C43 H43C 109.5 . . ?
H43A C43 H43C 109.5 . . ?
H43B C43 H43C 109.5 . . ?
O8 C44 H44A 109.5 . . ?
O8 C44 H44B 109.5 . . ?
H44A C44 H44B 109.5 . . ?
O8 C44 H44C 109.5 . . ?
H44A C44 H44C 109.5 . . ?
H44B C44 H44C 109.5 . . ?
 
loop_
 _geom_torsion_atom_site_label_1
 _geom_torsion_atom_site_label_2
 _geom_torsion_atom_site_label_3
 _geom_torsion_atom_site_label_4
 _geom_torsion
 _geom_torsion_site_symmetry_1
 _geom_torsion_site_symmetry_2
 _geom_torsion_site_symmetry_3
 _geom_torsion_site_symmetry_4
 _geom_torsion_publ_flag
Pr1 O1 C2 C3 -32.6(5) . . . . ?
Pr1 O1 C2 C1 148.9(2) . . . . ?
F3 C1 C2 O1 -56.0(4) . . . . ?
F2 C1 C2 O1 62.8(4) . . . . ?
F1 C1 C2 O1 -177.2(3) . . . . ?
F3 C1 C2 C3 125.4(3) . . . . ?
F2 C1 C2 C3 -115.8(3) . . . . ?
F1 C1 C2 C3 4.2(4) . . . . ?
O1 C2 C3 C4 1.4(5) . . . . ?
C1 C2 C3 C4 179.7(3) . . . . ?
Pr1 O2 C4 C3 2.5(5) . . . . ?
Pr1 O2 C4 C5 -179.27(19) . . . . ?
C2 C3 C4 O2 14.3(5) . . . . ?
C2 C3 C4 C5 -163.9(3) . . . . ?
O2 C4 C5 C6 23.1(4) . . . . ?
C3 C4 C5 C6 -158.7(3) . . . . ?
O2 C4 C5 C14 -154.8(3) . . . . ?
C3 C4 C5 C14 23.4(4) . . . . ?
C14 C5 C6 C7 0.9(4) . . . . ?
C4 C5 C6 C7 -177.1(3) . . . . ?
C5 C6 C7 C8 179.0(3) . . . . ?
C5 C6 C7 C12 1.9(4) . . . . ?
C9 C8 C7 C6 -175.8(3) . . . . ?
C9 C8 C7 C12 1.3(4) . . . . ?
C7 C8 C9 C10 -0.4(5) . . . . ?
C8 C9 C10 C11 -0.7(5) . . . . ?
C9 C10 C11 C12 1.0(5) . . . . ?
C10 C11 C12 C13 178.9(3) . . . . ?
C10 C11 C12 C7 -0.1(5) . . . . ?
C6 C7 C12 C13 -3.0(4) . . . . ?
C8 C7 C12 C13 179.9(3) . . . . ?
C6 C7 C12 C11 176.1(3) . . . . ?
C8 C7 C12 C11 -1.0(4) . . . . ?
C11 C12 C13 C14 -177.8(3) . . . . ?
C7 C12 C13 C14 1.2(5) . . . . ?
C12 C13 C14 C5 1.6(5) . . . . ?
C6 C5 C14 C13 -2.7(5) . . . . ?
C4 C5 C14 C13 175.2(3) . . . . ?
Pr1 O3 C16 C17 15.5(5) . . . . ?
Pr1 O3 C16 C15 -161.2(2) . . . . ?
F4 C15 C16 O3 -160.5(3) . . . . ?
F6 C15 C16 O3 -38.8(4) . . . . ?
F5 C15 C16 O3 79.7(3) . . . . ?
F4 C15 C16 C17 22.4(4) . . . . ?
F6 C15 C16 C17 144.1(3) . . . . ?
F5 C15 C16 C17 -97.4(3) . . . . ?
O3 C16 C17 C18 0.1(5) . . . . ?
C15 C16 C17 C18 176.7(3) . . . . ?
Pr1 O4 C18 C17 -25.0(5) . . . . ?
Pr1 O4 C18 C19 152.1(2) . . . . ?
C16 C17 C18 O4 3.5(5) . . . . ?
C16 C17 C18 C19 -173.4(3) . . . . ?
C20 C19 C18 O4 -29.2(4) . . . . ?
C28 C19 C18 O4 152.2(3) . . . . ?
C20 C19 C18 C17 148.0(3) . . . . ?
C28 C19 C18 C17 -30.6(4) . . . . ?
C28 C19 C20 C21 1.5(4) . . . . ?
C18 C19 C20 C21 -177.2(3) . . . . ?
C19 C20 C21 C22 179.0(3) . . . . ?
C19 C20 C21 C26 -1.9(4) . . . . ?
C20 C21 C22 C23 179.0(3) . . . . ?
C26 C21 C22 C23 -0.2(4) . . . . ?
C21 C22 C23 C24 -0.2(5) . . . . ?
C22 C23 C24 C25 0.7(5) . . . . ?
C23 C24 C25 C26 -0.8(5) . . . . ?
C24 C25 C26 C27 -179.4(3) . . . . ?
C24 C25 C26 C21 0.4(5) . . . . ?
C20 C21 C26 C25 -179.1(3) . . . . ?
C22 C21 C26 C25 0.1(4) . . . . ?
C20 C21 C26 C27 0.7(4) . . . . ?
C22 C21 C26 C27 179.9(3) . . . . ?
C25 C26 C27 C28 -179.4(3) . . . . ?
C21 C26 C27 C28 0.8(4) . . . . ?
C26 C27 C28 C19 -1.2(5) . . . . ?
C20 C19 C28 C27 0.1(4) . . . . ?
C18 C19 C28 C27 178.6(3) . . . . ?
Pr1 O5 C30 C31 32.4(4) . . . . ?
Pr1 O5 C30 C29 -148.9(2) . . . . ?
F9 C29 C30 O5 176.4(3) . . . . ?
F7 C29 C30 O5 53.8(4) . . . . ?
F8 C29 C30 O5 -64.1(3) . . . . ?
F9 C29 C30 C31 -4.8(4) . . . . ?
F7 C29 C30 C31 -127.4(3) . . . . ?
F8 C29 C30 C31 114.6(3) . . . . ?
O5 C30 C31 C32 2.4(5) . . . . ?
C29 C30 C31 C32 -176.1(3) . . . . ?
Pr1 O6 C32 C31 -35.4(4) . . . . ?
Pr1 O6 C32 C33 144.6(2) . . . . ?
C30 C31 C32 O6 -2.4(5) . . . . ?
C30 C31 C32 C33 177.6(3) . . . . ?
O6 C32 C33 C34 173.7(3) . . . . ?
C31 C32 C33 C34 -6.3(4) . . . . ?
O6 C32 C33 C42 -8.0(4) . . . . ?
C31 C32 C33 C42 171.9(3) . . . . ?
C42 C33 C34 C35 0.2(4) . . . . ?
C32 C33 C34 C35 178.4(3) . . . . ?
C33 C34 C35 C36 -179.4(3) . . . . ?
C33 C34 C35 C40 -0.2(4) . . . . ?
C34 C35 C36 C37 179.0(3) . . . . ?
C40 C35 C36 C37 -0.2(5) . . . . ?
C35 C36 C37 C38 0.1(5) . . . . ?
C36 C37 C38 C39 0.0(5) . . . . ?
C37 C38 C39 C40 -0.1(5) . . . . ?
C38 C39 C40 C41 -179.5(3) . . . . ?
C38 C39 C40 C35 0.1(5) . . . . ?
C36 C35 C40 C39 0.1(4) . . . . ?
C34 C35 C40 C39 -179.1(3) . . . . ?
C36 C35 C40 C41 179.7(3) . . . . ?
C34 C35 C40 C41 0.5(4) . . . . ?
C39 C40 C41 C42 178.9(3) . . . . ?
C35 C40 C41 C42 -0.7(4) . . . . ?
C40 C41 C42 C33 0.7(5) . . . . ?
C34 C33 C42 C41 -0.5(5) . . . . ?
C32 C33 C42 C41 -178.8(3) . . . . ?
 
_refine_diff_density_max    1.143
_refine_diff_density_min   -1.213
_refine_diff_density_rms    0.108

_shelx_res_file
;
TITL RF1758  [PrL3(MeOH)2]  in P2(1)/c
    rf1758.res
    created by SHELXL-2016/6 at 15:08:34 on 14-Jul-2020
CELL  0.71073   8.9307  28.9448  16.2421   90.000  105.674   90.000
ZERR    4.000   0.0004   0.0012   0.0007    0.000    0.002    0.000
LATT  1
SYMM -X, 1/2+Y, 1/2-Z
SFAC C H O F Pr
UNIT 176 128 32 36 4

L.S. 20
BOND $H
LIST 6
CONF
HTAB
ACTA
FMAP 2
PLAN 12

TEMP -173.15
SIZE 0.18 0.14 0.09

WGHT    0.010500   10.362400
FVAR       0.06531
PR1   5    0.464232    0.540233    0.647789    11.00000    0.01512    0.01058 =
         0.00840    0.00055    0.00122    0.00102
H1O   2    0.385958    0.455777    0.540127    11.00000   -1.50000
C1    1    0.733380    0.448533    0.870881    11.00000    0.02691    0.01732 =
         0.01469    0.00328    0.00290    0.00352
F1    4    0.783250    0.450857    0.956306    11.00000    0.06263    0.02176 =
         0.01384    0.00442   -0.00090    0.01021
O1    3    0.644293    0.491760    0.746567    11.00000    0.01998    0.01745 =
         0.01172    0.00106    0.00093    0.00443
F2    4    0.844336    0.426511    0.845265    11.00000    0.03394    0.01853 =
         0.03448    0.00281    0.00755    0.01163
H2O   2    0.708524    0.506402    0.575820    11.00000   -1.50000
C2    1    0.697457    0.495463    0.826983    11.00000    0.01416    0.01616 =
         0.01453    0.00147    0.00566    0.00362
O2    3    0.615360    0.586622    0.764554    11.00000    0.02497    0.01414 =
         0.01159    0.00005   -0.00246    0.00048
F3    4    0.608226    0.421340    0.851667    11.00000    0.03560    0.02208 =
         0.03541    0.01037    0.00598   -0.00736
C3    1    0.727937    0.534740    0.876017    11.00000    0.02183    0.01788 =
         0.01034    0.00197    0.00218    0.00150
AFIX  43
H3    2    0.770198    0.531775    0.936077    11.00000   -1.20000
AFIX   0
O3    3    0.316262    0.507038    0.736917    11.00000    0.02456    0.01726 =
         0.01759    0.00118    0.00936    0.00080
O4    3    0.285088    0.595409    0.674494    11.00000    0.02212    0.01663 =
         0.01561    0.00223    0.00813    0.00484
F4    4    0.093006    0.501459    0.882093    11.00000    0.03258    0.02482 =
         0.03572    0.00816    0.02149    0.00142
C4    1    0.698640    0.579456    0.840269    11.00000    0.01462    0.01856 =
         0.01149   -0.00006    0.00372    0.00159
F5    4    0.337245    0.485933    0.916292    11.00000    0.02901    0.03147 =
         0.01773    0.01003   -0.00127    0.00108
C5    1    0.770123    0.620495    0.890655    11.00000    0.01368    0.01784 =
         0.00986   -0.00028    0.00294   -0.00003
O5    3    0.284920    0.548490    0.503928    11.00000    0.01838    0.01012 =
         0.01329    0.00071    0.00109    0.00233
F6    4    0.179525    0.447176    0.817173    11.00000    0.04313    0.01690 =
         0.02816    0.00168    0.01373   -0.00754
C6    1    0.704528    0.663418    0.869248    11.00000    0.01148    0.01813 =
         0.01267   -0.00003    0.00226   -0.00043
AFIX  43
H6    2    0.611541    0.666090    0.824209    11.00000   -1.20000
AFIX   0
O6    3    0.515711    0.611593    0.578702    11.00000    0.01490    0.01420 =
         0.01590    0.00379    0.00241    0.00216
F8    4    0.074755    0.554262    0.341953    11.00000    0.03523    0.04706 =
         0.02699   -0.01650   -0.01221    0.01108
O8    3    0.698939    0.529562    0.584941    11.00000    0.01689    0.01384 =
         0.01528   -0.00350    0.00142   -0.00066
C8    1    0.709201    0.748074    0.891323    11.00000    0.01712    0.01850 =
         0.01848    0.00100    0.00667    0.00194
AFIX  43
H8    2    0.613467    0.751311    0.848480    11.00000   -1.20000
AFIX   0
F7    4   -0.031253    0.553379    0.445075    11.00000    0.02104    0.04887 =
         0.04895    0.02278   -0.00206   -0.01445
O7    3    0.418893    0.460363    0.587958    11.00000    0.02908    0.01441 =
         0.01296   -0.00053    0.00195   -0.00447
C7    1    0.773035    0.703452    0.913037    11.00000    0.01388    0.01501 =
         0.01310    0.00034    0.00640   -0.00104
F9    4   -0.016996    0.616374    0.378371    11.00000    0.02042    0.01942 =
         0.04126    0.00765   -0.01080    0.00240
C9    1    0.783535    0.786398    0.931178    11.00000    0.02584    0.01488 =
         0.02710   -0.00042    0.01148   -0.00130
AFIX  43
H9    2    0.739602    0.816084    0.915627    11.00000   -1.20000
AFIX   0
C10   1    0.925945    0.782257    0.995672    11.00000    0.02584    0.02071 =
         0.02900   -0.00659    0.00914   -0.00873
AFIX  43
H10   2    0.977522    0.809190    1.022614    11.00000   -1.20000
AFIX   0
C11   1    0.989069    0.739934    1.019156    11.00000    0.01675    0.02539 =
         0.01723   -0.00398    0.00407   -0.00561
AFIX  43
H11   2    1.083700    0.737560    1.063103    11.00000   -1.20000
AFIX   0
C12   1    0.915345    0.699163    0.978817    11.00000    0.01443    0.01978 =
         0.01277   -0.00272    0.00463   -0.00163
C13   1    0.979096    0.654780    1.000684    11.00000    0.01355    0.02361 =
         0.01268    0.00014   -0.00215    0.00067
AFIX  43
H13   2    1.072695    0.651609    1.045146    11.00000   -1.20000
AFIX   0
C15   1    0.210128    0.489357    0.850370    11.00000    0.02013    0.02057 =
         0.01591    0.00102    0.00483   -0.00254
C14   1    0.908310    0.616207    0.958894    11.00000    0.02052    0.02039 =
         0.01441    0.00204    0.00231    0.00300
AFIX  43
H14   2    0.951465    0.586535    0.975453    11.00000   -1.20000
AFIX   0
C16   1    0.239649    0.524183    0.784360    11.00000    0.01338    0.01657 =
         0.01330    0.00258    0.00080   -0.00396
C17   1    0.187519    0.568901    0.787165    11.00000    0.01601    0.01512 =
         0.01499   -0.00054    0.00319   -0.00164
AFIX  43
H17   2    0.130727    0.576698    0.826937    11.00000   -1.20000
AFIX   0
C19   1    0.174916    0.652562    0.742033    11.00000    0.01244    0.01637 =
         0.01170    0.00168    0.00199    0.00321
C18   1    0.217353    0.603357    0.731684    11.00000    0.01073    0.01475 =
         0.01086   -0.00140    0.00049   -0.00023
C20   1    0.267700    0.686191    0.721272    11.00000    0.01272    0.01835 =
         0.00999    0.00233    0.00251    0.00118
AFIX  43
H20   2    0.351418    0.677358    0.698937    11.00000   -1.20000
AFIX   0
C21   1    0.240758    0.733382    0.732538    11.00000    0.01539    0.01599 =
         0.00848    0.00019    0.00070    0.00170
C22   1    0.336726    0.768474    0.712700    11.00000    0.02019    0.01926 =
         0.01436    0.00107    0.00428   -0.00075
AFIX  43
H22   2    0.422966    0.760226    0.692035    11.00000   -1.20000
AFIX   0
C23   1    0.305812    0.813958    0.723141    11.00000    0.02976    0.01683 =
         0.02114    0.00356    0.00503   -0.00327
AFIX  43
H23   2    0.371031    0.837107    0.709868    11.00000   -1.20000
AFIX   0
C24   1    0.177837    0.826943    0.753477    11.00000    0.03619    0.01404 =
         0.01887    0.00048    0.00564    0.00483
AFIX  43
H24   2    0.156859    0.858725    0.759835    11.00000   -1.20000
AFIX   0
C25   1    0.083693    0.793891    0.773804    11.00000    0.02657    0.02151 =
         0.01657    0.00201    0.00606    0.00980
AFIX  43
H25   2   -0.001331    0.802930    0.794871    11.00000   -1.20000
AFIX   0
C26   1    0.112264    0.746396    0.763628    11.00000    0.01579    0.01959 =
         0.00992    0.00134    0.00124    0.00471
C27   1    0.017558    0.711048    0.782922    11.00000    0.01725    0.02287 =
         0.01354    0.00364    0.00755    0.00633
AFIX  43
H27   2   -0.069296    0.719359    0.802997    11.00000   -1.20000
AFIX   0
C28   1    0.047333    0.665325    0.773534    11.00000    0.01411    0.01922 =
         0.01462    0.00496    0.00325    0.00063
AFIX  43
H28   2   -0.016917    0.642270    0.787993    11.00000   -1.20000
AFIX   0
C29   1    0.059426    0.578215    0.409369    11.00000    0.01543    0.01615 =
         0.02181    0.00190   -0.00091   -0.00024
C30   1    0.218978    0.586335    0.471956    11.00000    0.01403    0.01875 =
         0.01050    0.00150    0.00247    0.00129
C31   1    0.272499    0.630529    0.485075    11.00000    0.01627    0.01357 =
         0.01429    0.00543    0.00132    0.00108
AFIX  43
H31   2    0.206369    0.654912    0.457721    11.00000   -1.20000
AFIX   0
C32   1    0.424520    0.641979    0.538434    11.00000    0.01504    0.01451 =
         0.01221    0.00246    0.00594    0.00042
C33   1    0.479109    0.690660    0.547763    11.00000    0.01395    0.01316 =
         0.01488    0.00075    0.00520    0.00030
C34   1    0.396293    0.726493    0.500856    11.00000    0.01300    0.01522 =
         0.01467    0.00062    0.00204   -0.00064
AFIX  43
H34   2    0.300849    0.720234    0.459410    11.00000   -1.20000
AFIX   0
C35   1    0.451638    0.772656    0.513608    11.00000    0.01426    0.01465 =
         0.01383    0.00071    0.00461    0.00011
C36   1    0.367114    0.809954    0.466426    11.00000    0.01789    0.01819 =
         0.01604    0.00148    0.00250    0.00180
AFIX  43
H36   2    0.271816    0.804212    0.424502    11.00000   -1.20000
AFIX   0
C37   1    0.422034    0.854169    0.480941    11.00000    0.02609    0.01706 =
         0.02147    0.00155    0.00646    0.00265
AFIX  43
H37   2    0.364499    0.878955    0.449108    11.00000   -1.20000
AFIX   0
C38   1    0.563350    0.863190    0.542782    11.00000    0.02624    0.01516 =
         0.02211   -0.00412    0.01043   -0.00342
AFIX  43
H38   2    0.600278    0.894041    0.552293    11.00000   -1.20000
AFIX   0
C39   1    0.647431    0.828187    0.588997    11.00000    0.01672    0.01903 =
         0.01811   -0.00368    0.00561   -0.00381
AFIX  43
H39   2    0.742621    0.834775    0.630409    11.00000   -1.20000
AFIX   0
C40   1    0.594189    0.782028    0.575860    11.00000    0.01523    0.01823 =
         0.01378   -0.00232    0.00702   -0.00075
C41   1    0.677112    0.744357    0.622909    11.00000    0.01315    0.02237 =
         0.01656   -0.00141    0.00296   -0.00131
AFIX  43
H41   2    0.773162    0.750031    0.664255    11.00000   -1.20000
AFIX   0
C42   1    0.622352    0.700305    0.610224    11.00000    0.01470    0.01749 =
         0.01773    0.00250    0.00236    0.00142
AFIX  43
H42   2    0.679729    0.675813    0.643107    11.00000   -1.20000
AFIX   0
C43   1    0.429752    0.417301    0.632266    11.00000    0.03442    0.01592 =
         0.02250    0.00238    0.00527    0.00045
AFIX 137
H43A  2    0.355488    0.395318    0.597569    11.00000   -1.50000
H43B  2    0.405758    0.422049    0.687077    11.00000   -1.50000
H43C  2    0.535455    0.405013    0.642531    11.00000   -1.50000
AFIX   0
C44   1    0.842806    0.551107    0.632074    11.00000    0.01850    0.02711 =
         0.02919   -0.00960    0.00461   -0.00720
AFIX 137
H44A  2    0.922535    0.546210    0.601694    11.00000   -1.50000
H44B  2    0.877291    0.537379    0.689243    11.00000   -1.50000
H44C  2    0.826016    0.584320    0.637203    11.00000   -1.50000
AFIX   0
HKLF 4


REM  RF1758  [PrL3(MeOH)2]  in P2(1)/c
REM R1 =  0.0437 for   10371 Fo > 4sig(Fo)  and  0.0533 for all   11826 data
REM    567 parameters refined using      0 restraints

END

WGHT      0.0017     10.8250

REM Instructions for potential hydrogen bonds
EQIV $1 -x+1, -y+1, -z+1
HTAB O7 O8_$1
HTAB O8 O5_$1

REM Highest difference peak  1.143,  deepest hole -1.213,  1-sigma level  0.108
Q1    1   0.0680  0.6207  0.3535  11.00000  0.05    1.14
Q2    1   0.3800  0.5382  0.6552  11.00000  0.05    0.92
Q3    1   0.3191  0.4599  0.9433  11.00000  0.05    0.91
Q4    1   0.8163  0.6207  0.9394  11.00000  0.05    0.82
Q5    1   0.9517  0.5426  0.6468  11.00000  0.05    0.64
Q6    1  -0.0509  0.5796  0.4617  11.00000  0.05    0.63
Q7    1   0.4388  0.6988  0.6432  11.00000  0.05    0.56
Q8    1   0.4400  0.3838  0.5963  11.00000  0.05    0.53
Q9    1   0.5485  0.5402  0.6157  11.00000  0.05    0.52
Q10   1   0.4420  0.6694  0.5385  11.00000  0.05    0.51
Q11   1   0.6480  0.4582  0.7400  11.00000  0.05    0.48
Q12   1   0.7274  0.4700  0.8433  11.00000  0.05    0.48
;
_shelx_res_checksum   34283

_shelx_hkl_file
;
   1   0   0  219.72    9.28
   1   0   0  201.39    9.32
   1   0   0  222.84    9.35
   1   0   0  214.79    9.33
   1   0   0  212.12    9.74
   1   0   0  215.33    9.31
   1   0   0  221.04    9.29
   1   0   0  213.92    9.45
   1   0   0  219.13    9.36
  -1   0   0  198.45    9.54
  -1   0   0  194.94    9.53
   1   0   0  218.70    9.28
  -1   0   0  232.41    9.32
  -1   0   0  202.47    9.79
  -1   0   0  186.71    9.31
  -1   0   0  184.06    9.30
  -1   0   0  211.72    9.27
  -2   0   0    1.04    0.62
  -2   0   0    0.87    0.26
   2   0   0    0.38    0.41
  -2   0   0    1.22    0.48
  -2   0   0    0.57    0.29
   2   0   0    0.87    0.38
   2   0   0    0.96    0.31
   2   0   0    1.14    0.33
  -2   0   0    1.69    0.55
   2   0   0    1.68    0.73
   2   0   0    2.22    0.73
   2   0   0    0.84    0.32
   2   0   0    0.98    0.27
   2   0   0    0.50    0.42
   2   0   0    1.30    0.42
  -2   0   0    0.81    0.24
  -2   0   0    0.80    0.32
   2   0   0    1.05    0.25
   2   0   0    1.31    0.28
  -2   0   0    0.99    0.31
   3   0   0    6.36    0.84
   3   0   0    4.90    1.10
   3   0   0    6.31    1.11
   3   0   0    4.77    0.76
   3   0   0    6.59    0.81
   3   0   0    4.95    0.72
  -3   0   0    5.75    1.07
  -3   0   0    6.92    0.71
  -3   0   0    5.31    1.03
  -3   0   0    6.54    0.62
   3   0   0    6.87    0.72
   3   0   0    5.93    0.81
  -3   0   0    4.84    0.63
  -3   0   0    6.19    0.70
   3   0   0    5.67    1.46
  -3   0   0    9.19    0.97
  -3   0   0    3.71    1.19
  -3   0   0    5.33    1.08
  -3   0   0    7.45    0.67
   3   0   0    7.15    1.00
  -3   0   0    5.53    0.80
   3   0   0    5.35    1.12
   3   0   0    3.46    1.18
   4   0   0   91.65    6.52
   4   0   0   93.29    4.88
   4   0   0   95.21    4.84
   4   0   0   92.32    4.78
  -4   0   0   92.04    4.65
   4   0   0   97.73    6.64
  -4   0   0   90.18    5.34
  -4   0   0   92.81    4.60
  -4   0   0   92.46    5.43
   4   0   0   84.44    5.71
   4   0   0   93.44    5.61
   4   0   0   85.08    5.68
   4   0   0   94.62    5.29
   4   0   0   88.82    4.61
  -4   0   0  107.47    5.66
  -4   0   0   96.72    4.76
  -4   0   0   92.23    6.25
  -4   0   0   91.99    4.83
  -4   0   0   95.88    4.86
  -4   0   0   91.90    4.63
  -5   0   0    7.73    1.52
   5   0   0    7.69    1.19
  -5   0   0    8.03    1.04
   5   0   0    5.77    1.33
   5   0   0    8.70    1.87
  -5   0   0    6.94    1.46
  -5   0   0    7.92    1.04
   5   0   0   10.31    1.99
  -5   0   0    9.21    0.88
   5   0   0    9.02    1.21
   5   0   0    5.07    1.88
  -5   0   0    7.61    1.14
  -5   0   0    8.57    1.21
  -5   0   0    6.35    1.93
  -5   0   0    8.43    1.49
   5   0   0    8.00    1.18
   5   0   0    8.93    2.41
  -5   0   0    7.91    1.04
   5   0   0    9.77    1.12
  -6   0   0    0.74    0.59
   6   0   0   -0.18    0.44
  -6   0   0    1.88    1.23
   6   0   0    2.85    1.54
   6   0   0    0.22    0.29
  -6   0   0    0.16    0.39
   6   0   0    1.57    1.02
   6   0   0    0.30    0.77
   6   0   0   -0.05    0.39
   6   0   0    0.66    0.71
  -6   0   0    1.14    0.53
  -6   0   0    0.36    0.55
  -6   0   0    0.41    0.28
   6   0   0    0.95    0.58
  -6   0   0    0.01    0.29
  -6   0   0    1.89    0.76
  -6   0   0    0.46    0.54
   6   0   0   -0.23    0.92
   6   0   0    0.99    0.67
  -6   0   0    1.71    0.77
   7   0   0   -0.01    1.14
   7   0   0   -0.04    0.97
   7   0   0    0.09    0.55
   7   0   0   -0.44    0.74
   7   0   0   -0.99    0.47
  -7   0   0   -0.44    0.36
  -7   0   0   -0.20    0.51
   7   0   0    0.54    0.92
   7   0   0    0.42    0.84
  -7   0   0   -0.26    0.36
  -7   0   0   -0.02    0.56
  -7   0   0    0.08    0.32
  -7   0   0   -0.15    0.47
   7   0   0   -0.03    1.24
   7   0   0    0.51    0.74
  -7   0   0    0.12    0.54
  -7   0   0   -0.05    1.02
   7   0   0   -0.07    0.36
   8   0   0   10.10    2.64
  -8   0   0   16.12    2.28
   8   0   0   15.37    1.84
  -8   0   0   11.10    1.56
   8   0   0   11.81    3.70
   8   0   0   12.69    3.12
   8   0   0    9.87    1.79
  -8   0   0    9.34    1.54
   8   0   0   14.23    2.02
  -8   0   0   11.10    1.60
  -8   0   0   10.47    2.81
   8   0   0   12.42    4.04
   8   0   0   10.61    2.70
   8   0   0   11.43    1.97
   9   0   0    4.13    1.13
  -9   0   0    3.79    1.09
   9   0   0    2.78    1.13
   9   0   0    2.69    1.14
  -9   0   0    2.36    0.89
   9   0   0    3.95    1.45
  10   0   0    1.00    0.81
  10   0   0    1.62    0.86
 -10   0   0    1.00    0.85
  10   0   0    0.57    1.01
 -10   0   0    0.50    0.68
  11   0   0   13.10    2.50
 -11   0   0   12.25    2.06
  11   0   0   14.94    2.57
  11   0   0   12.82    2.17
 -12   0   0   14.46    2.39
  12   0   0    9.99    2.15
  12   0   0   11.55    2.70
   1  -1   0   28.04    1.44
   1  -1   0   26.19    1.27
   1  -1   0   25.84    1.27
   1  -1   0   24.43    1.26
  -1  -1   0   25.83    1.29
  -1  -1   0   23.90    1.28
  -1  -1   0   24.37    1.32
  -1  -1   0   27.98    1.39
   1  -1   0   24.91    1.30
  -1  -1   0   25.97    1.33
  -1  -1   0   25.15    1.30
  -1  -1   0   27.38    1.63
  -1  -1   0   27.11    1.61
   1  -1   0   27.80    1.41
   1  -1   0   26.07    1.35
   1  -1   0   25.99    1.25
  -1  -1   0   31.15    1.91
   1  -1   0   27.29    1.29
   1  -1   0   24.77    1.32
   1  -1   0   27.44    1.66
   1  -1   0   24.15    1.53
   1  -1   0   26.20    1.30
  -1   1   0   30.13    1.66
   1   1   0   25.59    1.47
  -1   1   0   23.36    1.31
   1   1   0   24.04    1.73
  -1   1   0   28.01    1.36
   1   1   0   26.12    1.29
   1   1   0   25.18    1.28
   1   1   0   25.77    1.32
  -1   1   0   26.90    1.36
  -1   1   0   25.67    1.26
   1   1   0   24.97    1.33
   1   1   0   24.77    1.53
  -1   1   0   23.64    1.24
  -1   1   0   29.42    1.32
  -1   1   0   25.49    1.21
  -1   1   0   27.44    1.28
   1   1   0   25.79    1.31
   1   1   0   25.76    1.36
   2  -1   0    2.22    0.68
  -2  -1   0    0.93    0.34
   2  -1   0    1.86    0.31
  -2  -1   0    1.14    0.31
   2  -1   0    1.05    0.34
   2  -1   0    1.23    0.30
  -2  -1   0    1.43    0.56
  -2  -1   0    1.44    0.41
   2  -1   0    3.89    0.53
   2  -1   0    1.28    0.29
  -2  -1   0    1.24    0.29
  -2  -1   0    3.99    0.56
   2  -1   0    1.70    0.41
   2  -1   0    4.24    0.46
  -2  -1   0    3.76    0.45
  -2  -1   0    1.04    0.26
   2  -1   0    3.53    0.49
  -2   1   0    2.72    0.42
  -2   1   0    1.03    0.26
  -2   1   0    1.11    0.25
  -2   1   0    1.96    0.32
   2   1   0    2.43    0.42
   2   1   0    1.28    0.58
   2   1   0    1.96    0.45
   2   1   0    3.01    0.46
   2   1   0    2.00    0.33
   2   1   0    1.58    0.50
  -2   1   0    2.00    0.53
   2   1   0    1.22    0.41
   2   1   0    1.35    0.32
  -2   1   0    1.88    0.38
   3  -1   0   14.67    1.01
   3  -1   0   10.14    1.04
   3  -1   0   12.15    1.01
   3  -1   0    5.65    0.88
   3   1   0    8.83    1.00
  -3   1   0    9.73    0.80
   4  -1   0   24.16    2.18
  -4  -1   0   18.93    2.04
   4  -1   0   20.26    1.44
   4  -1   0   22.88    1.65
   4  -1   0   20.78    2.62
   4  -1   0   21.98    1.68
   4  -1   0   21.28    3.10
  -4  -1   0   24.72    1.71
  -4  -1   0   19.35    1.48
   4  -1   0   26.50    1.82
   4  -1   0   20.15    3.09
  -4  -1   0   23.46    1.55
   4  -1   0   18.55    2.47
  -4  -1   0   22.80    1.75
  -4  -1   0   24.32    1.70
  -4  -1   0   20.77    3.07
  -4  -1   0   20.09    2.11
  -4  -1   0   21.04    1.48
   4  -1   0   20.93    1.84
  -4  -1   0   25.66    2.32
   4  -1   0   20.32    1.58
   4   1   0   20.26    3.14
  -4   1   0   23.71    1.52
  -4   1   0   24.52    2.06
   4   1   0   22.72    1.64
  -4   1   0   23.70    3.10
   4   1   0   21.48    1.65
   4   1   0   21.93    1.64
  -4   1   0   21.93    1.38
   4   1   0   18.25    3.04
   4   1   0   24.87    2.14
   4   1   0   23.40    2.41
  -4   1   0   23.19    1.64
  -4   1   0   21.76    1.65
  -4   1   0   22.87    1.88
   4   1   0   21.60    2.24
  -4   1   0   22.01    1.47
  -4   1   0   21.56    1.46
   4   1   0   22.88    1.51
  -4   1   0   17.93    1.81
   5  -1   0    6.41    1.36
   5  -1   0    5.92    2.00
   5  -1   0    5.01    1.40
  -5  -1   0    5.53    1.33
  -5  -1   0    4.77    0.85
  -5  -1   0    8.33    1.17
  -5  -1   0    8.65    1.05
  -5  -1   0    6.17    1.09
  -5  -1   0    4.97    0.88
   5  -1   0   18.99    3.25
   5  -1   0    7.24    0.96
  -5  -1   0    4.87    0.78
   5  -1   0    9.99    1.29
   5  -1   0   10.42    1.35
   5  -1   0    7.15    1.10
  -5   1   0    4.65    0.88
  -5   1   0    4.64    1.12
   5   1   0    6.67    1.48
   5   1   0    6.46    0.93
  -5   1   0    6.76    1.11
   5   1   0    7.17    1.09
   5   1   0    8.16    2.34
   5   1   0   20.01    3.33
  -5   1   0    6.99    0.90
  -5   1   0    5.96    0.76
   5   1   0    7.70    1.20
   5   1   0    9.51    1.25
  -5   1   0    4.83    0.84
  -5   1   0    8.77    1.03
   5   1   0    5.71    1.59
   6  -1   0   12.59    1.67
   6  -1   0   11.03    1.64
  -6  -1   0   15.21    1.56
   6  -1   0   12.01    3.06
   6  -1   0   10.05    3.01
  -6  -1   0   12.88    2.05
  -6  -1   0   13.91    1.71
  -6  -1   0   14.18    1.34
  -6  -1   0   10.77    1.41
  -6  -1   0    9.01    2.51
  -6  -1   0   11.83    1.64
  -6  -1   0   12.77    2.14
   6  -1   0   13.23    2.62
  -6  -1   0   12.59    1.19
   6  -1   0   12.75    2.18
   6  -1   0   12.14    1.62
  -6  -1   0   15.23    2.27
   6  -1   0   11.10    2.30
   6  -1   0    9.44    2.22
   6  -1   0   14.93    1.53
  -6   1   0   12.40    1.45
  -6   1   0   13.36    1.72
  -6   1   0   12.86    1.51
   6   1   0   11.17    2.46
  -6   1   0   10.86    1.71
   6   1   0   13.91    2.42
   6   1   0   11.15    1.59
  -6   1   0   13.54    2.77
   6   1   0    9.95    1.57
  -6   1   0   14.19    1.50
   6   1   0   11.37    2.91
   6   1   0   12.09    1.46
  -6   1   0   16.15    2.17
   6   1   0   12.08    3.26
  -6   1   0   11.81    1.13
  -6   1   0   14.60    1.12
   6   1   0   13.04    1.66
  -6   1   0   15.83    1.86
   6   1   0   13.28    2.52
   7  -1   0    0.31    1.48
  -7  -1   0    3.19    0.85
  -7  -1   0    1.55    0.93
  -7  -1   0    2.28    0.75
   7  -1   0    2.22    1.61
  -7  -1   0    2.07    1.02
   7  -1   0    2.52    1.40
   7  -1   0    1.16    0.69
   7  -1   0    0.62    0.75
  -7  -1   0    2.03    0.60
   7  -1   0    1.96    0.92
   7  -1   0    2.24    0.68
  -7  -1   0    2.05    1.49
  -7  -1   0    0.82    0.80
   7  -1   0    2.54    1.29
   7  -1   0    0.01    0.67
  -7  -1   0    1.63    0.74
   7  -1   0    1.57    1.26
  -7   1   0    0.78    1.20
   7   1   0    3.47    1.10
   7   1   0    2.52    1.85
  -7   1   0    2.51    0.74
   7   1   0    2.42    0.94
   7   1   0    0.94    1.21
   7   1   0    2.56    0.75
  -7   1   0    2.31    0.61
   7   1   0    1.86    1.32
   7   1   0    2.55    2.02
  -7   1   0    3.39    0.86
  -7   1   0    2.27    0.94
  -7   1   0    1.60    0.69
  -7   1   0    1.47    0.78
   7   1   0    1.06    0.68
   7   1   0    0.30    0.94
  -7   1   0    2.37    0.74
   7   1   0   -0.01    0.62
  -8  -1   0    0.76    0.82
   8  -1   0    3.41    2.54
  -8  -1   0    2.97    1.90
   8  -1   0    1.41    0.91
  -8  -1   0    1.65    0.66
   8  -1   0    1.62    1.42
   8  -1   0    1.86    1.29
  -8  -1   0    0.73    1.07
  -8  -1   0    1.04    0.77
   8  -1   0    1.49    0.69
   8  -1   0    1.19    1.96
   8  -1   0    1.72    1.02
   8  -1   0   -0.18    0.61
  -8  -1   0    2.23    0.82
   8  -1   0    0.39    1.15
   8  -1   0    2.15    1.55
   8   1   0    1.53    1.94
   8   1   0    2.85    1.42
   8   1   0    1.66    1.57
  -8   1   0    3.04    0.86
  -8   1   0    1.51    0.70
  -8   1   0    1.76    0.74
   8   1   0    1.30    0.96
   8   1   0    3.23    1.72
   8   1   0    2.73    0.85
  -8   1   0    1.35    1.21
   8   1   0    2.15    0.89
   8   1   0    0.53    1.59
   8   1   0    2.13    1.02
   8   1   0    3.08    1.58
   9  -1   0    2.61    0.93
   9  -1   0    1.64    0.96
  -9  -1   0    1.45    0.84
   9  -1   0    2.46    1.15
  -9  -1   0    1.84    0.93
   9  -1   0    2.84    1.25
   9   1   0    2.32    1.13
   9   1   0    2.13    1.19
  -9   1   0    3.40    1.00
   9   1   0    3.56    1.29
   9   1   0    2.09    0.89
  -9   1   0    2.88    0.96
 -10  -1   0    3.01    1.10
  10  -1   0    5.58    1.59
 -10  -1   0    6.65    1.41
  10  -1   0    4.27    1.21
  10  -1   0    5.23    1.51
  10   1   0    5.95    1.46
  10   1   0    3.55    1.48
 -10   1   0    2.31    0.98
  10   1   0    4.51    1.27
 -10   1   0    3.69    1.08
  11  -1   0   -0.54    0.88
  11  -1   0    1.28    0.89
 -11  -1   0    0.76    0.84
  11  -1   0    0.43    0.74
  11   1   0    1.54    1.27
  11   1   0    0.11    0.82
 -11   1   0    0.24    0.77
  11   1   0    0.95    0.89
  12  -1   0    0.43    0.92
  12  -1   0   -0.11    1.15
 -12  -1   0   -0.70    0.66
  12   1   0   -1.11    0.80
 -12   1   0    0.73    0.90
  12   1   0   -0.35    0.94
   1  -2   0  136.63    6.14
   1  -2   0  138.90    6.13
  -1  -2   0  140.45    6.22
  -1  -2   0  148.43    6.27
  -1  -2   0  136.32    6.19
   1  -2   0  131.31    6.23
   1  -2   0  140.00    6.33
  -1  -2   0  142.34    6.30
  -1  -2   0  137.23    6.24
  -1  -2   0  149.57    6.55
   1  -2   0  139.07    6.26
   1  -2   0  142.61    6.15
   1  -2   0  143.48    6.42
  -1  -2   0  155.25    6.93
  -1  -2   0  142.82    6.21
   1  -2   0  136.81    6.10
   1  -2   0  141.32    6.15
  -1  -2   0  147.42    6.58
   1   2   0  141.63    6.20
  -1   2   0  140.00    6.18
   1   2   0  128.49    6.81
  -1   2   0  142.69    6.29
   1   2   0  140.59    6.24
   1   2   0  147.29    6.23
  -1   2   0  140.83    6.12
  -1   2   0  135.51    6.23
  -1   2   0  129.42    6.14
   1   2   0  123.94    6.40
   1   2   0  126.87    6.54
  -1   2   0  142.16    6.26
   1   2   0  128.81    6.46
   1   2   0  138.57    6.24
   1   2   0  140.72    6.20
  -1   2   0  117.18    6.10
  -1   2   0  141.63    6.15
  -2  -2   0    4.85    1.03
   2  -2   0    9.66    0.63
   2  -2   0    6.66    0.74
  -2  -2   0   11.39    0.82
   2  -2   0    8.73    0.75
   2   2   0    9.68    0.76
   2   2   0    5.92    0.70
   2   2   0    4.44    1.15
   2   2   0    7.80    0.68
   2   2   0    5.94    0.70
   3  -2   0   70.17    5.07
  -3  -2   0   83.30    3.97
   3  -2   0   84.31    4.11
  -3  -2   0   80.93    4.00
   3  -2   0   80.15    4.32
  -3  -2   0   81.57    4.12
  -3  -2   0   76.99    5.39
   3  -2   0   84.41    3.97
  -3  -2   0   85.89    4.25
   3  -2   0   71.28    4.52
   3  -2   0   81.65    4.13
  -3  -2   0   88.28    5.06
   3  -2   0   80.81    4.01
  -3  -2   0   78.77    4.28
   3  -2   0   77.96    4.05
   3  -2   0   81.80    4.08
   3  -2   0   78.15    3.88
  -3  -2   0   79.51    3.92
   3  -2   0   77.67    5.08
   3  -2   0   73.23    4.57
  -3  -2   0   81.79    4.09
  -3  -2   0   78.33    4.81
  -3  -2   0   78.71    4.81
  -3   2   0   76.90    4.05
  -3   2   0   80.82    3.74
  -3   2   0   85.12    3.95
  -3   2   0   76.94    3.92
  -3   2   0   75.92    4.85
  -3   2   0   78.74    4.00
  -3   2   0   79.87    3.82
   3   2   0   80.62    4.55
  -3   2   0   86.06    3.93
  -3   2   0   77.63    3.87
  -3   2   0   79.94    4.17
   3   2   0   77.75    4.05
   3   2   0   79.74    4.05
  -3   2   0   81.62    3.91
   3   2   0   83.23    5.52
   3   2   0   80.48    4.79
   3   2   0   80.58    4.07
   3   2   0   76.03    3.92
  -3   2   0   81.50    4.36
   3   2   0   74.52    4.73
   4  -2   0   27.93    1.75
   4  -2   0   28.64    2.11
  -4  -2   0   29.14    3.79
   4  -2   0   29.19    2.64
  -4  -2   0   33.49    2.80
  -4  -2   0   27.99    2.61
   4  -2   0   31.61    3.24
   4  -2   0   29.21    1.93
   4  -2   0   26.15    2.55
   4  -2   0   28.37    3.15
  -4  -2   0   28.09    1.84
   4  -2   0   28.82    1.95
  -4  -2   0   30.34    2.09
  -4  -2   0   29.37    2.63
  -4  -2   0   27.15    1.86
  -4  -2   0   31.97    2.14
   4  -2   0   30.17    2.41
  -4  -2   0   26.99    1.77
  -4  -2   0   30.57    2.00
   4  -2   0   30.89    2.06
   4  -2   0   30.77    2.04
   4   2   0   30.61    2.52
  -4   2   0   27.79    2.19
  -4   2   0   28.03    2.06
   4   2   0   27.44    2.63
  -4   2   0   27.56    1.80
   4   2   0   19.01    3.16
  -4   2   0   28.78    1.68
  -4   2   0   27.71    1.58
   4   2   0   30.04    1.83
   4   2   0   24.66    3.60
  -4   2   0   27.11    1.89
   4   2   0   27.32    2.64
  -4   2   0   26.92    1.74
  -4   2   0   29.45    2.82
  -4   2   0   32.00    2.02
   4   2   0   27.24    1.92
  -4   2   0   30.08    1.80
   4   2   0   26.70    1.89
  -4   2   0   25.46    1.71
   4   2   0   26.18    1.92
   5  -2   0   27.66    2.67
  -5  -2   0   21.74    2.83
  -5  -2   0   25.77    1.85
   5  -2   0   27.71    4.15
  -5  -2   0   28.86    4.15
   5  -2   0   24.10    2.00
   5  -2   0   24.29    1.89
  -5  -2   0   28.17    2.69
   5  -2   0   23.32    3.13
   5  -2   0   24.40    3.81
   5  -2   0   23.65    2.24
   5  -2   0   23.33    3.12
   5  -2   0   24.50    1.93
  -5  -2   0   27.01    2.02
  -5  -2   0   25.44    1.81
  -5  -2   0   23.80    2.05
  -5  -2   0   20.35    2.73
  -5  -2   0   26.86    1.81
  -5  -2   0   26.71    1.99
   5  -2   0   27.24    1.79
  -5   2   0   26.56    1.55
  -5   2   0   25.34    3.41
   5   2   0   23.85    2.52
   5   2   0   27.81    2.02
  -5   2   0   25.15    1.96
   5   2   0   25.49    3.32
  -5   2   0   26.14    1.87
   5   2   0   27.45    4.30
   5   2   0   23.99    3.14
   5   2   0   24.26    1.97
  -5   2   0   26.03    1.82
  -5   2   0   24.54    2.17
   5   2   0   24.35    3.93
   5   2   0   24.71    1.77
   5   2   0   27.19    1.99
  -5   2   0   26.62    1.76
  -5   2   0   27.01    2.11
  -5   2   0   26.46    1.65
  -5   2   0   23.25    1.71
   6  -2   0    7.75    1.35
   6  -2   0    7.62    1.30
  -6  -2   0    6.48    1.23
   6  -2   0    7.15    1.09
  -6  -2   0    7.33    1.67
   6  -2   0   10.89    2.28
  -6  -2   0    9.77    1.83
   6  -2   0   12.24    2.38
   6  -2   0    6.54    1.55
  -6  -2   0    8.08    1.75
  -6  -2   0   10.09    2.61
  -6  -2   0    7.31    1.14
   6  -2   0    7.32    2.36
   6  -2   0    8.32    1.96
  -6  -2   0    7.25    1.32
   6  -2   0    7.37    2.53
  -6  -2   0    9.02    1.28
  -6  -2   0    7.50    1.09
  -6  -2   0    8.72    1.19
   6  -2   0    8.14    1.33
   6   2   0    8.19    1.90
  -6   2   0    7.26    1.08
  -6   2   0   10.30    1.65
   6   2   0    6.88    1.21
  -6   2   0    7.65    1.31
   6   2   0    8.67    1.19
  -6   2   0    6.70    1.00
   6   2   0    5.78    1.86
   6   2   0   12.38    2.45
   6   2   0    9.43    2.19
   6   2   0   11.44    2.94
   6   2   0    6.20    2.40
  -6   2   0    8.14    1.13
  -6   2   0   10.27    1.03
   6   2   0    8.89    1.39
  -6   2   0    7.73    0.94
  -6   2   0    7.33    0.73
   6   2   0    7.74    1.36
  -6   2   0    8.58    2.12
  -6   2   0   10.21    1.45
  -7  -2   0    0.52    0.70
  -7  -2   0   -0.41    0.55
   7  -2   0   -0.06    0.60
   7  -2   0   -0.46    0.50
   7  -2   0    3.58    1.98
   7  -2   0    1.81    1.25
  -7  -2   0   -0.12    0.62
   7  -2   0    0.89    0.77
  -7  -2   0    0.41    0.45
   7  -2   0   -0.03    0.39
   7  -2   0   -0.31    1.17
   7  -2   0   -0.11    0.87
  -7  -2   0   -0.06    0.42
   7  -2   0    3.51    1.60
  -7  -2   0    0.02    0.36
  -7  -2   0    0.56    0.53
   7  -2   0   -0.24    0.75
  -7  -2   0    0.88    0.78
  -7  -2   0    2.05    1.47
   7   2   0    0.43    0.92
   7   2   0   -0.04    0.63
  -7   2   0    0.28    0.48
  -7   2   0   -0.18    0.37
   7   2   0    1.82    1.22
   7   2   0    1.69    1.39
   7   2   0    0.03    0.45
   7   2   0    0.38    0.38
  -7   2   0   -0.41    0.89
   7   2   0    1.38    1.29
  -7   2   0    0.23    0.31
   7   2   0   -0.12    1.46
   7   2   0   -0.06    1.18
  -7   2   0    0.44    0.46
   7   2   0   -0.01    0.60
  -7   2   0    0.15    0.44
   8  -2   0   10.71    2.84
  -8  -2   0    8.76    1.83
   8  -2   0    9.66    1.75
   8  -2   0    7.43    3.26
   8  -2   0    6.61    2.48
   8  -2   0    8.42    1.65
  -8  -2   0   15.99    3.81
   8  -2   0    8.24    1.74
  -8  -2   0    9.89    1.48
   8  -2   0   10.66    1.54
  -8  -2   0    9.78    1.53
  -8  -2   0   10.06    1.67
  -8  -2   0    8.53    1.97
   8  -2   0    8.33    3.03
   8  -2   0   13.08    2.81
   8   2   0   14.24    3.81
   8   2   0   13.04    3.01
   8   2   0   11.24    1.61
   8   2   0   11.09    3.12
   8   2   0   11.84    1.95
  -8   2   0    7.58    1.14
   8   2   0    8.23    2.53
   8   2   0   13.14    1.93
  -8   2   0   12.48    1.65
   8   2   0   11.55    3.96
   8   2   0   10.28    2.74
  -8   2   0   10.00    1.43
   8   2   0    8.61    1.59
   9  -2   0    1.43    0.95
   9  -2   0    1.45    0.71
   9  -2   0    3.01    1.79
   9  -2   0    0.60    1.08
   9  -2   0    1.77    1.10
  -9  -2   0    1.08    0.84
  -9  -2   0    1.42    0.80
   9   2   0    0.84    0.76
   9   2   0    1.05    0.88
   9   2   0    1.65    1.08
  -9   2   0    0.83    0.71
  -9   2   0   -0.09    0.56
   9   2   0    0.44    0.52
 -10  -2   0    8.92    1.70
 -10  -2   0    6.48    1.46
  10  -2   0    8.27    1.87
  10  -2   0    7.19    1.71
  10  -2   0    6.90    1.55
  10   2   0    7.28    1.57
  10   2   0    9.54    1.90
 -10   2   0    8.85    1.51
 -10   2   0    6.52    1.45
  10   2   0    7.81    1.87
 -11  -2   0    5.36    1.46
 -11  -2   0    6.65    1.58
  11  -2   0    4.87    1.35
  11  -2   0    8.37    1.88
  11  -2   0    6.46    1.88
 -11   2   0    8.11    1.68
  11   2   0    5.60    1.71
  11   2   0    7.04    1.70
  11   2   0    7.49    1.93
  12  -2   0   16.74    3.03
 -12  -2   0    9.19    1.95
  12   2   0   14.72    2.86
  12   2   0   12.91    2.42
 -12   2   0   10.79    2.09
   0  -3   0    0.03    0.05
   0  -3   0    0.06    0.04
   0  -3   0    0.04    0.06
   0   3   0   -0.02    0.03
   0   3   0    0.00    0.01
   0   3   0    0.07    0.06
  -1  -3   0   51.50    2.83
   1  -3   0   57.70    2.53
  -1  -3   0   55.01    2.61
   1  -3   0   52.79    2.56
   1  -3   0   58.42    2.48
   1  -3   0   57.59    2.66
  -1  -3   0   47.70    2.84
  -1  -3   0   60.04    3.26
  -1  -3   0   54.92    2.99
   1  -3   0   58.07    2.54
   1  -3   0   55.61    2.65
  -1  -3   0   56.76    2.83
   1  -3   0   55.78    2.52
  -1  -3   0   52.75    3.21
  -1  -3   0   54.88    2.58
  -1  -3   0   59.68    2.61
  -1  -3   0   60.26    2.67
   1  -3   0   56.05    2.48
  -1   3   0   60.16    2.68
   1   3   0   55.56    2.62
  -1   3   0   47.82    2.50
   1   3   0   57.51    2.77
   1   3   0   50.86    2.99
   1   3   0   55.40    2.60
   1   3   0   55.87    2.63
  -1   3   0   54.83    2.65
   1   3   0   50.57    3.23
   1   3   0   52.71    2.98
   1   3   0   58.35    2.61
   1   3   0   53.01    2.90
  -1   3   0   54.58    2.52
   1   3   0   50.91    2.76
   2  -3   0    0.05    0.14
   2  -3   0    0.28    0.25
  -2  -3   0    0.37    0.41
   2  -3   0    0.53    0.44
  -2  -3   0    0.31    0.28
   2  -3   0    0.15    0.10
  -2  -3   0    0.04    0.17
  -2  -3   0    0.15    0.27
  -2  -3   0    0.96    0.50
  -2  -3   0    0.06    0.33
   2  -3   0    0.10    0.32
  -2  -3   0    0.46    0.57
  -2  -3   0    0.75    0.36
   2  -3   0    0.35    0.20
   2  -3   0    0.14    0.13
   2  -3   0    0.73    0.25
  -2  -3   0    0.07    0.17
   2  -3   0    0.00    0.24
   2  -3   0    0.32    0.16
  -2  -3   0   -0.02    0.26
  -2  -3   0   -0.01    0.19
   2  -3   0    0.36    0.24
   2  -3   0    0.19    0.22
   2  -3   0    0.36    0.24
  -2  -3   0    0.28    0.23
  -2   3   0    0.10    0.27
   2   3   0    0.25    0.22
   2   3   0    0.27    0.16
  -2   3   0    0.22    0.14
   2   3   0    0.35    0.26
  -2   3   0    0.03    0.19
   2   3   0    0.49    0.26
  -2   3   0    0.25    0.18
  -2   3   0    0.08    0.07
  -2   3   0    0.13    0.06
  -2   3   0    0.42    0.30
   2   3   0   -0.06    0.35
   2   3   0    0.31    0.34
  -2   3   0    0.23    0.18
  -2   3   0    0.28    0.16
   2   3   0   -0.09    0.46
   2   3   0    1.81    0.58
  -2   3   0    0.20    0.18
   2   3   0    0.13    0.53
   2   3   0    1.03    0.45
   2   3   0    0.04    0.28
   3  -3   0    4.92    0.66
   3  -3   0    6.34    1.30
  -3  -3   0    6.65    0.83
   3  -3   0    8.26    0.92
   3  -3   0    6.86    0.71
   3  -3   0    6.77    0.77
   3  -3   0    6.04    0.82
   3  -3   0    8.28    0.87
  -3  -3   0    8.21    0.83
  -3  -3   0    5.69    1.29
  -3  -3   0    5.87    0.88
  -3  -3   0    6.63    0.97
   3  -3   0    8.04    0.93
   3  -3   0    5.16    0.80
  -3  -3   0    5.18    0.94
  -3  -3   0    6.71    0.82
   3   3   0    7.70    0.89
  -3   3   0    5.60    0.77
  -3   3   0    7.58    0.97
  -3   3   0    6.90    0.74
  -3   3   0    7.87    0.67
   3   3   0    6.43    1.61
   3   3   0    5.66    1.21
   3   3   0    9.03    0.99
   3   3   0    7.57    0.87
  -3   3   0    7.06    0.74
   3   3   0    5.86    1.09
  -3   3   0    5.60    0.65
   3   3   0    7.56    0.81
  -3   3   0    6.21    0.47
  -4  -3   0   27.31    2.60
   4  -3   0   27.69    1.87
   4  -3   0   23.15    2.32
  -4  -3   0   25.25    1.65
  -4  -3   0   26.72    1.85
   4  -3   0   24.95    1.85
  -4  -3   0   24.36    3.53
   4  -3   0   25.96    1.62
   4  -3   0   28.34    2.49
  -4  -3   0   24.20    1.97
  -4  -3   0   27.52    2.63
  -4  -3   0   25.94    1.85
   4  -3   0   27.91    1.94
   4  -3   0   23.50    3.24
   4  -3   0   26.52    1.90
   4  -3   0   27.83    2.21
  -4  -3   0   25.29    1.95
   4  -3   0   25.57    3.41
  -4  -3   0   23.73    2.48
  -4  -3   0   23.82    1.71
   4  -3   0   27.40    1.81
  -4   3   0   25.64    1.65
  -4   3   0   25.88    1.46
   4   3   0   23.69    2.32
   4   3   0   25.40    1.82
   4   3   0   26.50    1.83
  -4   3   0   24.28    1.34
  -4   3   0   28.83    2.03
   4   3   0   25.89    2.57
   4   3   0   27.50    3.89
  -4   3   0   26.55    1.59
  -4   3   0   21.94    2.34
  -4   3   0   27.06    1.74
  -4   3   0   25.25    1.60
   4   3   0   26.66    1.70
  -4   3   0   24.95    1.29
  -4   3   0   26.39    1.65
  -4   3   0   27.36    1.87
   4   3   0   26.70    2.52
   4   3   0   23.08    2.89
   4   3   0   24.75    1.79
   5  -3   0   38.49    3.49
  -5  -3   0   42.98    2.61
  -5  -3   0   40.70    3.51
   5  -3   0   39.01    2.64
  -5  -3   0   40.84    3.54
   5  -3   0   40.45    2.95
   5  -3   0   39.90    2.40
  -5  -3   0   39.70    2.54
   5  -3   0   44.89    3.72
  -5  -3   0   36.17    2.41
   5  -3   0   38.25    3.26
  -5  -3   0   42.89    3.61
  -5  -3   0   43.68    4.40
   5  -3   0   33.06    4.56
   5  -3   0   42.93    2.65
   5  -3   0   37.44    2.67
  -5  -3   0   38.91    2.81
   5  -3   0   45.84    4.45
  -5  -3   0   40.59    2.71
   5  -3   0   38.35    2.70
  -5  -3   0   37.79    2.70
   5   3   0   40.09    2.46
   5   3   0   42.11    2.74
   5   3   0   40.71    2.64
   5   3   0   38.45    2.63
  -5   3   0   39.45    1.96
  -5   3   0   41.63    2.71
   5   3   0   42.98    3.74
  -5   3   0   41.67    3.62
  -5   3   0   39.79    2.02
   5   3   0   36.91    3.34
  -5   3   0   42.34    2.56
   5   3   0   41.78    3.59
  -5   3   0   41.14    2.20
  -5   3   0   38.45    2.40
  -5   3   0   36.49    2.33
  -5   3   0   45.27    2.91
   5   3   0   41.53    3.76
  -5   3   0   39.40    2.33
   5   3   0   37.54    5.18
  -6  -3   0   23.75    2.35
  -6  -3   0   16.42    3.44
   6  -3   0   17.30    3.54
  -6  -3   0   18.13    1.66
   6  -3   0   20.10    3.10
   6  -3   0   21.42    3.20
   6  -3   0   20.87    4.11
  -6  -3   0   19.77    2.95
  -6  -3   0   19.67    1.77
  -6  -3   0   22.54    2.34
   6  -3   0   17.35    1.50
   6  -3   0   14.01    2.25
   6  -3   0   16.48    2.89
  -6  -3   0   18.08    1.59
   6  -3   0   17.59    1.97
  -6  -3   0   18.31    2.79
   6  -3   0   18.57    2.03
  -6  -3   0   16.41    1.75
  -6  -3   0   21.37    2.94
   6  -3   0   15.25    1.95
   6   3   0   17.95    2.97
   6   3   0   21.88    3.53
   6   3   0   22.14    1.96
  -6   3   0   20.21    1.47
   6   3   0   18.16    2.91
  -6   3   0   19.25    1.29
   6   3   0   21.17    3.20
  -6   3   0   18.47    1.56
  -6   3   0   17.06    2.00
   6   3   0   20.12    1.64
   6   3   0   11.03    3.21
   6   3   0   16.44    1.93
   6   3   0   19.52    2.08
  -6   3   0   18.60    1.50
  -6   3   0   19.98    1.90
  -6   3   0   16.94    1.50
  -6   3   0   21.16    3.16
  -7  -3   0   10.40    2.28
   7  -3   0    9.61    3.26
  -7  -3   0   13.11    2.38
   7  -3   0   12.49    2.66
   7  -3   0    9.37    1.66
   7  -3   0   12.03    2.69
  -7  -3   0   11.87    1.49
  -7  -3   0   17.37    2.67
   7  -3   0   11.66    1.48
  -7  -3   0   10.45    1.48
   7  -3   0   11.42    2.35
   7  -3   0   14.02    3.50
  -7  -3   0   12.65    3.32
   7  -3   0   10.06    1.65
  -7  -3   0    9.65    1.42
  -7  -3   0   12.09    1.63
   7  -3   0   13.00    1.83
  -7  -3   0   11.12    1.79
   7  -3   0    8.99    2.39
   7   3   0   10.16    3.50
  -7   3   0   10.68    1.44
   7   3   0   11.95    1.73
   7   3   0   10.13    2.38
   7   3   0    7.60    2.17
   7   3   0   13.22    2.83
   7   3   0   13.37    1.62
   7   3   0   13.49    3.14
  -7   3   0    9.80    1.31
  -7   3   0   11.46    1.17
   7   3   0   12.44    1.79
  -7   3   0   12.43    2.61
  -7   3   0   10.40    1.18
   7   3   0   13.66    1.93
  -8  -3   0   23.37    2.37
   8  -3   0   21.69    2.76
   8  -3   0   21.26    4.00
   8  -3   0   19.30    2.15
   8  -3   0   23.55    3.84
  -8  -3   0   20.99    2.40
   8  -3   0   17.57    3.49
   8  -3   0   21.75    4.04
   8  -3   0   23.13    2.66
  -8  -3   0   24.29    3.35
  -8  -3   0   21.92    3.09
  -8  -3   0   25.36    4.87
  -8  -3   0   26.09    3.41
   8  -3   0   16.58    4.23
   8  -3   0   19.90    5.17
   8  -3   0   21.17    2.54
  -8  -3   0   21.38    1.95
  -8  -3   0   19.23    2.42
  -8   3   0   18.49    1.46
   8   3   0   19.45    2.51
   8   3   0   18.74    2.36
   8   3   0   18.58    3.47
   8   3   0   20.56    5.27
   8   3   0   19.13    2.60
   8   3   0   16.61    3.43
   8   3   0   25.00    4.65
   8   3   0   18.42    3.59
  -8   3   0   20.05    2.18
   8   3   0   24.06    2.06
  -8   3   0   22.29    1.85
   9  -3   0    3.28    1.15
  -9  -3   0    1.57    0.90
   9  -3   0    4.51    2.15
  -9  -3   0    2.49    0.94
   9  -3   0    3.10    1.22
   9  -3   0    2.70    0.95
   9  -3   0    3.26    1.39
   9   3   0    4.16    1.26
  -9   3   0    1.59    0.74
   9   3   0    3.97    1.33
  -9   3   0    2.08    0.85
   9   3   0    1.08    0.74
   9   3   0    5.02    1.57
 -10  -3   0   12.28    2.00
  10  -3   0   16.20    2.56
  10  -3   0   13.00    2.37
 -10  -3   0   14.76    2.07
  10  -3   0   12.64    1.97
  10   3   0   11.93    1.93
  10   3   0   12.04    2.24
  10   3   0   11.17    2.10
 -10   3   0    8.79    1.67
 -11  -3   0    1.98    1.05
  11  -3   0    3.44    1.45
 -11  -3   0   -0.55    0.70
  11  -3   0    1.92    0.91
  11  -3   0    1.09    0.91
  11   3   0    1.66    1.02
  11   3   0    1.80    1.19
  11   3   0    2.69    1.31
 -11   3   0    1.37    0.94
  12  -3   0    4.39    1.73
 -12  -3   0    3.95    1.41
 -12   3   0    2.60    1.21
  12   3   0    4.18    1.80
  12   3   0    0.80    1.19
   0  -4   0  321.62   14.45
   0  -4   0  337.03   14.34
   0  -4   0  333.19   14.36
   0   4   0  328.97   14.36
   0   4   0  315.68   14.46
  -1  -4   0   52.10    2.39
  -1  -4   0   53.34    2.56
   1  -4   0   45.12    2.37
  -1  -4   0   48.19    2.33
  -1  -4   0   49.25    2.30
  -1  -4   0   42.74    2.93
  -1  -4   0   42.06    2.60
   1  -4   0   48.76    2.37
  -1  -4   0   56.69    2.89
   1  -4   0   46.49    2.21
  -1  -4   0   47.26    2.31
  -1  -4   0   41.02    2.67
  -1  -4   0   51.62    2.51
   1  -4   0   50.86    2.22
  -1   4   0   49.11    2.22
   1   4   0   51.06    2.47
   1   4   0   46.82    2.31
   1   4   0   43.62    2.98
   1   4   0   42.20    2.64
   1   4   0   42.75    2.56
   1   4   0   53.09    2.46
   1   4   0   49.13    2.31
   1   4   0   50.28    2.34
  -1   4   0   47.42    2.39
  -1   4   0   49.56    2.37
   1   4   0   43.60    2.34
   1   4   0   54.00    2.79
   1   4   0   49.28    2.35
   2  -4   0    4.59    0.42
  -2  -4   0    3.86    0.66
  -2  -4   0    5.67    0.73
  -2  -4   0    7.60    1.14
  -2  -4   0    8.57    1.15
   2  -4   0    4.55    0.48
   2  -4   0    3.43    0.53
  -2  -4   0    4.56    0.54
  -2  -4   0    8.58    1.49
  -2  -4   0    3.16    0.67
   2  -4   0    4.59    0.47
  -2  -4   0    3.68    0.52
   2  -4   0    5.68    0.89
   2  -4   0    3.77    0.32
  -2  -4   0    5.11    0.63
   2  -4   0    4.05    0.44
   2  -4   0    3.22    0.66
   2  -4   0    5.03    0.65
   2  -4   0    5.06    0.43
  -2  -4   0    4.74    0.57
   2  -4   0    4.50    0.50
  -2   4   0    3.63    0.38
  -2   4   0    3.96    0.56
  -2   4   0    4.16    0.37
  -2   4   0    6.62    0.56
   2   4   0    3.26    0.84
   2   4   0    4.79    0.63
   2   4   0    3.99    0.52
  -2   4   0    3.61    0.32
  -2   4   0    4.69    0.49
   2   4   0    7.32    1.01
   2   4   0    7.16    0.96
  -2   4   0    4.49    0.47
   2   4   0    2.75    0.71
   2   4   0    8.50    1.44
   2   4   0    4.75    1.21
   2   4   0    4.27    0.54
   2   4   0    4.25    0.57
  -2   4   0    4.18    0.60
  -3  -4   0    6.61    0.97
   3  -4   0    4.79    0.72
   3  -4   0    5.10    1.24
  -3  -4   0    4.85    1.15
  -3  -4   0    4.51    0.72
   3  -4   0    4.99    1.15
  -3  -4   0    5.07    1.16
  -3  -4   0    5.41    1.00
   3  -4   0    4.92    0.59
   3  -4   0    4.80    0.50
  -3  -4   0    3.82    0.74
  -3  -4   0    5.27    1.28
   3  -4   0    5.67    0.71
   3  -4   0    4.64    0.81
  -3  -4   0    3.73    0.62
   3  -4   0    4.30    0.65
   3  -4   0    5.63    0.67
   3  -4   0    5.58    0.79
   3  -4   0    5.46    0.74
  -3  -4   0    4.73    0.64
   3  -4   0    3.76    0.78
  -3  -4   0    5.54    1.52
   3   4   0    6.12    1.15
  -3   4   0    5.97    0.63
  -3   4   0    5.88    0.79
  -3   4   0    4.52    0.59
  -3   4   0    4.72    0.67
   3   4   0    6.15    1.20
  -3   4   0    3.90    0.82
  -3   4   0    4.35    0.28
  -3   4   0    4.86    0.75
   3   4   0    5.15    1.56
   3   4   0    4.96    0.75
   3   4   0    6.73    1.57
   3   4   0    5.14    0.75
   3   4   0    2.76    0.85
  -3   4   0    4.71    0.54
   3   4   0    4.04    1.08
  -3   4   0    6.62    0.70
   3   4   0    4.38    0.62
  -3   4   0    4.50    0.30
   3   4   0    3.61    0.64
   4  -4   0    0.37    0.30
   4  -4   0    0.79    0.62
  -4  -4   0    0.03    0.25
  -4  -4   0   -0.06    0.30
   4  -4   0    0.28    0.37
   4  -4   0   -0.22    0.31
  -4  -4   0    1.11    0.75
   4  -4   0    0.37    0.36
  -4  -4   0    0.23    0.33
   4  -4   0    0.03    0.34
  -4  -4   0    0.61    0.48
  -4  -4   0    0.13    0.35
  -4  -4   0    0.40    0.32
   4  -4   0    0.55    0.74
  -4  -4   0    0.70    0.65
   4  -4   0    0.80    0.45
  -4  -4   0    2.40    0.94
   4  -4   0    0.22    0.23
   4  -4   0    0.94    0.61
   4  -4   0    1.87    1.13
  -4  -4   0    2.03    1.11
  -4   4   0    0.33    0.29
  -4   4   0    0.05    0.35
   4   4   0    0.40    0.36
   4   4   0    2.65    0.98
   4   4   0    0.29    0.55
  -4   4   0    1.66    0.69
  -4   4   0    0.11    0.16
   4   4   0    0.14    0.46
   4   4   0    0.15    0.42
  -4   4   0    0.37    0.28
   4   4   0    0.21    0.33
   4   4   0    0.46    0.84
   4   4   0    1.97    1.13
   4   4   0    1.90    0.82
  -4   4   0    0.25    0.10
  -4   4   0    1.22    0.40
  -4   4   0   -0.03    0.20
   4   4   0    0.23    0.22
  -5  -4   0   44.01    3.82
  -5  -4   0   51.24    2.96
   5  -4   0   38.04    3.53
   5  -4   0   46.45    2.64
  -5  -4   0   46.78    2.81
   5  -4   0   46.37    3.51
  -5  -4   0   46.87    3.11
   5  -4   0   42.55    2.93
   5  -4   0   46.73    3.00
  -5  -4   0   45.94    2.94
   5  -4   0   38.56    4.28
  -5  -4   0   46.62    3.91
   5  -4   0   41.89    3.69
   5  -4   0   46.19    3.12
  -5  -4   0   41.44    3.80
   5  -4   0   51.37    3.02
  -5  -4   0   44.76    2.70
   5  -4   0   44.18    2.79
  -5  -4   0   46.94    4.72
  -5  -4   0   47.46    3.16
   5  -4   0   42.82    4.41
   5   4   0   44.17    3.74
  -5   4   0   50.00    3.00
  -5   4   0   44.67    2.35
   5   4   0   46.17    4.68
   5   4   0   42.66    2.69
   5   4   0   36.44    5.29
   5   4   0   47.42    2.96
   5   4   0   43.22    3.81
  -5   4   0   44.29    3.63
  -5   4   0   48.85    2.97
  -5   4   0   46.21    2.57
   5   4   0   41.10    2.81
  -5   4   0   44.92    2.24
   5   4   0   40.64    3.63
  -5   4   0   45.30    2.65
   5   4   0   44.42    2.87
   5   4   0   48.41    4.16
  -6  -4   0    1.65    1.07
   6  -4   0    2.64    1.16
   6  -4   0    2.57    0.80
  -6  -4   0    3.42    1.29
  -6  -4   0    1.31    0.60
  -6  -4   0    0.76    0.75
   6  -4   0    0.44    1.20
  -6  -4   0    3.45    1.69
   6  -4   0    4.07    1.43
  -6  -4   0    1.70    0.68
   6  -4   0    2.83    1.30
   6  -4   0    1.42    0.77
   6  -4   0    3.26    0.94
  -6  -4   0    1.42    0.58
   6  -4   0    1.07    0.72
   6  -4   0    1.46    0.54
  -6  -4   0    1.11    0.90
  -6  -4   0    0.96    0.54
   6  -4   0    3.23    1.72
   6   4   0    1.10    1.33
  -6   4   0    1.81    0.55
  -6   4   0    1.43    0.58
  -6   4   0    1.75    0.64
   6   4   0    2.15    0.78
   6   4   0    2.72    1.25
  -6   4   0    2.01    0.36
  -6   4   0    2.85    1.16
   6   4   0    1.18    0.56
   6   4   0    2.27    0.82
  -6   4   0    1.77    0.72
   6   4   0    1.11    0.55
   6   4   0    4.54    1.92
   6   4   0    3.88    1.37
  -6   4   0    1.55    0.29
   6   4   0    0.54    0.93
   6   4   0    0.54    0.84
  -6   4   0    1.15    0.34
  -7  -4   0    1.68    0.69
   7  -4   0    2.96    1.44
   7  -4   0    0.80    0.80
  -7  -4   0    2.07    0.71
   7  -4   0    2.87    1.00
  -7  -4   0    2.66    1.31
  -7  -4   0    3.46    1.87
  -7  -4   0    1.23    0.80
   7  -4   0    1.13    0.56
   7  -4   0    1.90    1.77
   7  -4   0    0.65    0.62
  -7  -4   0    1.96    0.79
   7  -4   0    0.06    0.93
  -7  -4   0    1.62    0.68
  -7  -4   0    3.39    1.08
  -7  -4   0    2.99    1.36
   7  -4   0    2.83    1.77
   7  -4   0    1.59    1.27
   7  -4   0    0.76    0.92
   7   4   0    1.36    0.61
  -7   4   0    1.35    0.58
  -7   4   0    1.70    0.66
   7   4   0    1.77    0.91
   7   4   0    1.64    1.69
   7   4   0    2.92    1.84
   7   4   0    2.39    1.27
  -7   4   0    1.41    0.39
   7   4   0    0.57    0.66
   7   4   0    1.75    0.74
   7   4   0    2.16    1.34
   7   4   0    3.37    1.56
   7   4   0    1.03    1.26
  -8  -4   0    2.13    0.79
   8  -4   0    2.98    1.63
  -8  -4   0    2.44    0.87
  -8  -4   0    2.37    0.83
   8  -4   0    0.88    1.31
   8  -4   0    4.56    2.03
   8  -4   0    1.52    0.93
   8  -4   0    2.20    1.10
   8  -4   0    3.85    2.40
   8  -4   0    1.51    0.68
  -8  -4   0    1.65    1.08
  -8  -4   0    1.73    1.02
   8  -4   0    2.57    1.93
  -8  -4   0    2.07    2.14
   8  -4   0    2.03    0.93
  -8  -4   0    2.35    1.26
  -8  -4   0    3.46    1.45
   8  -4   0    0.96    1.10
   8   4   0    3.74    1.65
   8   4   0    1.24    1.27
  -8   4   0    3.34    0.86
   8   4   0    2.39    1.03
   8   4   0    1.57    0.66
  -8   4   0    2.37    0.40
   8   4   0    1.60    2.31
   8   4   0    3.86    2.24
  -8   4   0    2.55    0.74
   8   4   0    3.86    1.12
   8   4   0    1.74    1.65
   8   4   0    0.79    1.15
   8   4   0    3.49    1.11
  -9  -4   0    8.19    2.23
  -9  -4   0   11.84    1.85
  -9  -4   0    8.23    1.51
   9  -4   0    7.50    1.84
   9  -4   0    3.68    3.90
   9  -4   0    8.68    1.83
   9  -4   0    8.61    2.61
   9  -4   0   11.57    1.75
   9  -4   0    8.95    1.77
  -9   4   0    9.50    1.55
  -9   4   0    9.88    1.39
   9   4   0    9.22    1.94
   9   4   0   10.25    1.71
   9   4   0    8.07    1.70
   9   4   0    8.94    1.80
  10  -4   0    1.77    0.85
  10  -4   0    2.85    1.36
 -10  -4   0    2.20    1.08
  10  -4   0    1.61    1.09
 -10  -4   0    1.45    0.89
  10   4   0    2.21    1.00
 -10   4   0    0.83    0.76
  10   4   0    2.30    1.27
  10   4   0    0.94    0.99
 -11  -4   0    1.73    1.09
  11  -4   0    3.53    1.35
  11  -4   0    1.26    1.12
 -11  -4   0    3.08    1.20
  11  -4   0    4.82    1.35
  11   4   0    2.77    1.41
  11   4   0    2.47    1.53
 -11   4   0    2.62    1.11
  11   4   0    4.65    1.44
  12  -4   0    2.18    1.43
 -12  -4   0    3.94    1.41
  12   4   0    3.24    1.69
 -12   4   0    3.40    1.30
  12   4   0    3.71    1.49
   0  -5   0    0.16    0.10
   0  -5   0    0.22    0.09
   0  -5   0    0.15    0.12
   0   5   0    0.31    0.13
   0   5   0    0.11    0.05
   0   5   0    0.28    0.11
  -1  -5   0    6.19    0.61
  -1  -5   0    6.06    0.55
  -1  -5   0    6.43    0.69
  -1  -5   0    6.51    0.52
  -1  -5   0    6.60    0.48
  -1  -5   0    5.63    1.04
  -1  -5   0    5.79    0.87
  -1  -5   0    6.37    0.49
   1  -5   0    6.43    0.53
   1  -5   0    5.81    0.38
   1  -5   0    5.83    0.61
  -1  -5   0    6.78    0.94
  -1  -5   0    5.86    0.82
   1  -5   0    6.40    0.40
   1   5   0    6.86    1.16
  -1   5   0    6.60    0.57
   1   5   0    6.45    0.63
   1   5   0    7.00    0.90
   1   5   0    6.32    0.53
   1   5   0    6.59    0.49
  -1   5   0    6.13    0.40
   1   5   0    6.74    0.53
   1   5   0    6.58    0.49
  -1   5   0    6.24    0.55
   1   5   0    5.46    0.76
   1   5   0    6.55    0.52
   2  -5   0    4.17    0.47
  -2  -5   0    5.99    0.71
  -2  -5   0    4.99    1.22
  -2  -5   0    5.10    0.97
  -2  -5   0    4.66    0.90
   2  -5   0    4.77    0.49
   2  -5   0    4.68    0.41
   2  -5   0    5.22    0.66
  -2  -5   0    4.85    0.61
  -2  -5   0    6.04    1.30
   2  -5   0    4.82    0.29
   2  -5   0    4.77    0.65
   2  -5   0    4.68    0.41
   2  -5   0    5.12    0.33
  -2  -5   0    5.29    0.62
  -2  -5   0    5.09    0.71
  -2  -5   0    4.57    0.89
  -2  -5   0    4.23    0.54
   2  -5   0    4.68    0.70
   2  -5   0    3.98    0.69
  -2  -5   0    5.05    0.75
   2   5   0    4.11    0.89
  -2   5   0    4.21    0.59
   2   5   0    4.13    0.96
   2   5   0    4.70    0.61
  -2   5   0    5.73    0.47
   2   5   0    4.98    0.82
   2   5   0    5.74    0.64
   2   5   0    5.51    0.68
   2   5   0    4.18    1.18
   2   5   0    5.82    0.61
   2   5   0    5.20    1.06
   2   5   0    4.89    0.77
  -2   5   0    5.24    0.44
  -2   5   0    4.91    0.65
  -3  -5   0   38.29    2.55
   3  -5   0   37.94    2.14
  -3  -5   0   45.30    3.22
   3  -5   0   35.58    2.29
  -3  -5   0   38.81    2.76
  -3  -5   0   36.23    2.20
   3  -5   0   40.22    2.07
  -3  -5   0   41.80    3.09
   3  -5   0   39.30    2.95
   3  -5   0   37.21    1.97
  -3  -5   0   38.59    2.16
   3  -5   0   35.91    2.26
   3  -5   0   40.32    2.28
   3  -5   0   38.72    2.18
  -3  -5   0   36.39    2.28
  -3  -5   0   42.09    2.51
   3  -5   0   38.86    2.38
   3  -5   0   40.32    2.11
   3  -5   0   40.83    3.07
   3  -5   0   36.88    2.13
  -3  -5   0   39.12    3.56
  -3   5   0   40.28    2.34
   3   5   0   34.85    2.97
   3   5   0   35.05    2.82
   3   5   0   39.13    2.24
  -3   5   0   37.48    1.94
  -3   5   0   37.23    2.26
   3   5   0   36.31    2.16
  -3   5   0   39.07    1.98
  -3   5   0   42.40    2.10
   3   5   0   37.52    2.27
   3   5   0   42.54    2.80
   3   5   0   33.38    3.42
   3   5   0   41.82    2.88
  -3   5   0   41.95    2.38
  -3   5   0   39.22    2.08
  -3   5   0   41.94    2.11
   3   5   0   44.01    3.61
   3   5   0   39.16    2.28
   4  -5   0   40.80    2.58
  -4  -5   0   34.21    2.74
  -4  -5   0   42.93    3.50
  -4  -5   0   34.88    2.35
  -4  -5   0   37.99    2.68
   4  -5   0   40.38    3.61
  -4  -5   0   37.50    3.44
   4  -5   0   37.52    2.47
  -4  -5   0   48.43    4.31
  -4  -5   0   38.54    2.62
   4  -5   0   38.61    2.64
   4  -5   0   39.28    2.35
   4  -5   0   36.35    2.20
   4  -5   0   37.40    2.44
  -4  -5   0   36.70    2.29
   4  -5   0   39.48    2.95
  -4  -5   0   40.70    2.55
   4  -5   0   40.96    2.93
  -4  -5   0   45.49    3.59
   4  -5   0   38.18    2.36
   4  -5   0   41.57    3.67
   4   5   0   46.42    3.40
   4   5   0   40.85    2.38
  -4   5   0   41.39    2.52
   4   5   0   37.36    2.43
   4   5   0   43.09    4.25
  -4   5   0   38.64    2.13
  -4   5   0   44.23    2.31
   4   5   0   33.21    3.25
   4   5   0   44.10    4.10
   4   5   0   38.24    3.19
   4   5   0   42.80    2.53
  -4   5   0   40.91    2.20
  -4   5   0   39.41    2.25
   4   5   0   40.79    2.50
  -4   5   0   39.94    2.35
   4   5   0   48.06    3.33
  -4   5   0   47.80    2.99
   5  -5   0   89.16    5.07
   5  -5   0   97.29    5.76
  -5  -5   0  107.89    5.31
  -5  -5   0   88.66    6.31
  -5  -5   0   96.25    5.42
  -5  -5   0   96.93    5.04
  -5  -5   0   89.52    6.29
   5  -5   0   93.09    4.78
  -5  -5   0   93.00    4.89
   5  -5   0   90.57    5.96
  -5  -5   0   96.85    5.19
   5  -5   0   98.54    5.30
  -5  -5   0   92.91    5.41
   5  -5   0   95.41    5.02
   5  -5   0  100.24    5.23
   5  -5   0   79.26    5.81
   5  -5   0   85.68    6.76
   5  -5   0   84.23    6.81
  -5  -5   0   96.84    6.42
  -5  -5   0   97.03    7.37
   5  -5   0   99.18    5.29
  -5   5   0   89.05    4.78
   5   5   0   99.27    7.37
   5   5   0   93.46    6.54
  -5   5   0   93.17    4.22
   5   5   0   96.56    6.28
   5   5   0   93.46    6.19
   5   5   0  102.70    5.21
   5   5   0   88.59    5.04
  -5   5   0  100.47    5.19
   5   5   0   94.32    5.10
   5   5   0   91.60    6.03
  -5   5   0  100.83    5.04
  -5   5   0   95.74    4.24
   5   5   0   91.62    4.92
  -5   5   0   90.71    5.70
   5   5   0   92.67    7.55
  -5   5   0   98.88    4.71
   6  -5   0   56.63    3.31
  -6  -5   0   59.18    3.43
  -6  -5   0   52.91    4.71
   6  -5   0   54.07    4.71
  -6  -5   0   64.88    4.08
   6  -5   0   54.40    3.54
  -6  -5   0   57.78    3.53
  -6  -5   0   64.64    4.92
  -6  -5   0   57.82    5.81
   6  -5   0   61.47    3.71
   6  -5   0   61.15    4.65
   6  -5   0   57.95    5.65
   6  -5   0   58.71    4.11
  -6  -5   0   60.29    3.84
   6  -5   0   51.51    4.59
  -6  -5   0   58.63    3.58
   6  -5   0   54.86    5.75
   6  -5   0   53.63    3.70
  -6  -5   0   53.31    4.68
   6   5   0   53.34    4.70
   6   5   0   56.19    5.74
  -6   5   0   57.73    3.32
   6   5   0   60.48    3.67
  -6   5   0   57.25    4.36
   6   5   0   59.05    6.23
  -6   5   0   54.98    3.17
   6   5   0   56.21    3.61
  -6   5   0   58.25    2.67
   6   5   0   62.15    4.79
   6   5   0   58.70    3.43
   6   5   0   50.28    4.92
  -6   5   0   53.94    3.62
   6   5   0   59.07    4.79
   6   5   0   57.87    3.70
  -7  -5   0   19.62    3.39
   7  -5   0   19.40    3.39
   7  -5   0   23.08    2.49
  -7  -5   0   16.06    2.95
  -7  -5   0   23.29    1.96
  -7  -5   0   23.23    4.64
   7  -5   0   16.63    3.13
  -7  -5   0   21.87    1.88
   7  -5   0   18.31    3.25
  -7  -5   0   21.12    2.60
   7  -5   0   22.30    2.07
   7  -5   0   18.24    4.40
   7  -5   0   20.40    1.74
   7  -5   0   22.36    3.11
   7  -5   0   17.69    2.33
   7  -5   0   21.98    4.40
  -7  -5   0   21.37    2.04
  -7  -5   0   21.58    1.95
  -7  -5   0   26.59    3.59
   7   5   0   22.61    3.43
  -7   5   0   21.14    1.65
   7   5   0   27.19    4.37
   7   5   0   21.57    1.89
   7   5   0   14.15    2.87
   7   5   0   21.68    4.91
   7   5   0   19.13    2.31
   7   5   0   23.71    2.62
  -7   5   0   24.19    1.87
   7   5   0   25.00    4.64
   7   5   0   18.86    3.42
   7   5   0   24.10    2.52
  -8  -5   0   80.96    6.40
  -8  -5   0   83.37    6.36
   8  -5   0   75.09    5.01
  -8  -5   0   86.51    5.49
   8  -5   0   74.95    7.91
   8  -5   0   83.11    4.76
   8  -5   0   73.50    6.72
  -8  -5   0   92.94    6.42
  -8  -5   0   81.15    4.99
   8  -5   0   83.51    5.40
  -8  -5   0   81.86    4.93
   8  -5   0   81.86    6.52
   8  -5   0   83.79    5.21
   8  -5   0   66.18    9.38
  -8  -5   0   83.92    4.84
   8  -5   0   83.75    7.12
   8  -5   0   77.71    6.91
   8   5   0   77.74    5.07
   8   5   0   86.96   12.38
   8   5   0   76.50    5.08
   8   5   0   81.64    6.72
   8   5   0   76.42    7.27
  -8   5   0   84.69    4.51
   8   5   0   96.42    8.77
  -8   5   0   74.70    4.65
   8   5   0   92.02    7.29
   8   5   0   82.54    4.90
   8   5   0   85.99    5.41
   8   5   0   88.47    6.70
   9  -5   0   38.87    3.64
   9  -5   0   38.22    3.38
   9  -5   0   47.60    7.51
   9  -5   0   44.49    5.76
  -9  -5   0   44.43    3.22
  -9  -5   0   40.47    3.26
   9  -5   0   43.11    3.11
   9  -5   0   44.22    8.31
   9  -5   0   39.77    3.45
   9   5   0   43.48    3.54
   9   5   0   42.26    3.24
   9   5   0   40.65    3.46
  -9   5   0   38.81    3.03
  -9   5   0   44.27    2.83
   9   5   0   45.43    3.81
  10  -5   0   11.86    2.21
  10  -5   0   14.34    2.51
 -10  -5   0   13.94    2.17
 -10  -5   0   12.72    1.94
  10  -5   0   12.47    1.98
  10   5   0   12.76    2.03
  10   5   0   13.09    2.36
 -10   5   0   12.39    1.87
  10   5   0   14.56    2.36
  11  -5   0    7.46    1.83
  11  -5   0    7.75    1.95
 -11  -5   0    8.09    1.94
  11  -5   0    8.06    2.02
 -11  -5   0    9.78    1.84
  11   5   0    6.68    1.90
  11   5   0    8.76    1.91
 -11   5   0    8.11    1.66
  12  -5   0    2.31    1.38
 -12  -5   0    3.57    1.34
 -12   5   0    1.65    1.01
  12   5   0    3.57    1.66
   0  -6   0   20.35    1.04
   0  -6   0   20.43    1.08
   0  -6   0   18.85    0.98
   0   6   0   20.44    1.05
   0   6   0   18.71    1.07
   1  -6   0   10.77    0.79
  -1  -6   0    9.78    0.99
   1  -6   0   11.82    0.62
  -1  -6   0    9.68    0.76
  -1  -6   0    9.84    1.41
  -1  -6   0   11.53    0.74
  -1  -6   0   14.27    1.23
  -1  -6   0   10.78    0.67
  -1  -6   0   12.44    0.89
  -1  -6   0   11.90    0.78
  -1  -6   0   12.28    0.88
   1  -6   0   11.45    0.84
  -1  -6   0    8.59    1.11
  -1  -6   0   10.46    0.71
  -1  -6   0   11.62    0.79
   1   6   0   11.19    0.86
  -1   6   0   11.01    0.78
   1   6   0   10.92    0.75
   1   6   0   13.15    0.80
   1   6   0   11.56    0.73
   1   6   0   11.74    1.07
   1   6   0   11.59    0.74
  -1   6   0   10.70    0.61
   1   6   0    8.65    1.32
   1   6   0   10.73    0.72
  -2  -6   0    5.91    0.77
   2  -6   0    4.27    0.60
   2  -6   0    5.30    0.67
  -2  -6   0    4.39    0.54
  -2  -6   0    5.25    1.23
   2  -6   0    4.60    0.41
   2  -6   0    4.27    0.46
  -2  -6   0    3.23    0.78
  -2  -6   0    2.28    0.72
  -2  -6   0    4.61    0.83
  -2  -6   0    5.28    0.63
  -2  -6   0    5.92    1.29
   2  -6   0    3.97    0.36
   2  -6   0    4.12    0.43
   2  -6   0    4.29    0.61
  -2  -6   0    6.05    0.99
  -2  -6   0    4.80    0.59
  -2  -6   0    3.67    0.60
   2  -6   0    4.01    0.61
   2   6   0    5.58    0.65
   2   6   0    4.46    0.61
   2   6   0    4.67    0.77
  -2   6   0    4.62    0.65
  -2   6   0    4.77    0.40
  -2   6   0    4.14    0.44
   2   6   0    4.41    0.57
   2   6   0    4.53    0.61
   2   6   0    5.58    1.11
   2   6   0    3.52    0.69
   2   6   0    3.73    0.84
   2   6   0    3.52    0.91
  -2   6   0    3.32    0.56
   2   6   0    4.42    0.70
   2   6   0    4.30    1.25
  -3  -6   0   19.70    1.38
   3  -6   0   22.70    1.22
   3  -6   0   19.85    1.47
  -3  -6   0   22.66    1.52
   3  -6   0   17.87    1.84
   3  -6   0   18.67    1.27
  -3  -6   0   19.14    1.62
   3  -6   0   17.23    1.25
  -3  -6   0   27.25    2.33
  -3  -6   0   19.62    1.72
   3  -6   0   19.97    1.37
   3  -6   0   19.19    1.05
   3  -6   0   23.08    1.52
   3  -6   0   19.11    1.19
  -3  -6   0   25.09    2.20
   3  -6   0   20.09    1.25
   3  -6   0   22.49    2.04
   3  -6   0   18.45    1.20
  -3  -6   0   21.67    2.95
  -3  -6   0   18.66    1.29
   3   6   0   17.35    2.19
  -3   6   0   18.71    1.41
  -3   6   0   18.93    1.02
   3   6   0   20.85    1.43
   3   6   0   13.63    2.48
  -3   6   0   21.18    1.15
  -3   6   0   20.34    1.23
   3   6   0   22.40    1.88
   3   6   0   24.39    1.86
  -3   6   0   20.04    1.24
   3   6   0   21.25    1.40
  -3   6   0   19.70    1.06
  -3   6   0   20.96    1.50
   3   6   0   17.82    1.31
   3   6   0   15.70    2.22
   4  -6   0    0.27    0.32
  -4  -6   0    1.94    0.94
  -4  -6   0    1.33    0.81
  -4  -6   0    0.16    0.60
   4  -6   0    0.28    0.23
   4  -6   0    1.24    0.57
   4  -6   0   -0.26    0.51
   4  -6   0    0.44    0.40
  -4  -6   0    0.43    0.42
  -4  -6   0   -0.14    0.48
  -4  -6   0    0.11    0.38
   4  -6   0    0.26    0.36
   4  -6   0    0.15    0.21
  -4  -6   0    0.45    0.36
  -4  -6   0    0.14    0.82
  -4  -6   0    0.16    0.42
   4  -6   0    0.82    0.43
   4  -6   0    1.40    0.88
  -4  -6   0    0.44    0.30
   4  -6   0    0.96    0.44
   4  -6   0    1.35    0.60
   4   6   0    0.71    0.45
   4   6   0    0.44    0.80
  -4   6   0    0.39    0.24
  -4   6   0    0.30    0.27
  -4   6   0    0.36    0.43
   4   6   0    1.24    0.65
   4   6   0    1.70    1.16
  -4   6   0    0.47    0.25
   4   6   0    0.77    0.32
   4   6   0    0.89    0.77
   4   6   0    0.22    0.34
   4   6   0    0.19    0.52
  -4   6   0    1.10    0.43
   4   6   0    0.98    0.61
  -4   6   0    0.56    0.31
   4   6   0    0.39    0.44
  -4   6   0    0.37    0.22
  -5  -6   0   11.16    1.39
  -5  -6   0   14.12    1.65
   5  -6   0   14.96    1.37
   5  -6   0   12.46    1.56
  -5  -6   0   13.86    2.44
  -5  -6   0    9.77    2.55
   5  -6   0   12.32    2.06
  -5  -6   0   10.54    1.62
   5  -6   0   10.26    1.82
   5  -6   0   13.09    1.35
   5  -6   0   13.30    1.63
  -5  -6   0   13.15    2.48
   5  -6   0   12.17    2.60
   5  -6   0   11.36    1.22
   5  -6   0   11.02    1.47
  -5  -6   0   13.77    1.41
  -5  -6   0   11.82    1.55
   5  -6   0   15.16    2.02
  -5  -6   0   14.46    2.53
  -5  -6   0   10.92    1.67
   5  -6   0   16.08    2.98
  -5   6   0   12.51    1.75
   5   6   0   13.55    3.18
   5   6   0   11.20    1.45
  -5   6   0   15.41    1.21
   5   6   0   13.47    1.43
  -5   6   0   12.77    0.99
  -5   6   0   12.92    1.55
   5   6   0   16.54    2.46
   5   6   0   12.40    1.52
   5   6   0   12.55    2.81
  -5   6   0   11.62    1.23
   5   6   0   10.69    1.48
   5   6   0   11.60    2.22
   5   6   0   12.25    2.43
  -5   6   0   13.15    1.15
   5   6   0   13.78    2.18
  -6  -6   0    4.82    1.01
  -6  -6   0    3.76    0.88
   6  -6   0    4.43    1.92
   6  -6   0    4.47    0.81
  -6  -6   0    3.97    1.99
   6  -6   0    4.27    1.00
  -6  -6   0    2.76    1.32
  -6  -6   0    2.74    0.89
   6  -6   0    3.42    1.04
   6  -6   0    3.29    1.24
  -6  -6   0    2.08    0.69
   6  -6   0    3.20    1.30
   6  -6   0    3.11    0.87
   6  -6   0    3.77    1.01
  -6  -6   0    4.66    1.59
   6  -6   0    3.86    1.69
  -6  -6   0    4.71    1.60
  -6  -6   0    3.91    1.17
   6  -6   0    4.70    1.62
   6   6   0    3.57    1.63
  -6   6   0    4.21    1.12
   6   6   0    4.26    1.07
   6   6   0    3.36    0.89
   6   6   0    6.00    2.20
   6   6   0    4.35    1.46
   6   6   0    3.16    0.91
  -6   6   0    2.76    0.60
  -6   6   0    3.16    0.76
   6   6   0    5.57    1.62
   6   6   0    3.08    1.84
   6   6   0    2.49    1.33
   6   6   0    3.44    0.79
  -7  -6   0    0.16    0.46
  -7  -6   0    1.35    0.67
   7  -6   0    0.47    0.88
  -7  -6   0    0.19    0.71
  -7  -6   0    4.64    2.14
   7  -6   0    9.34    2.23
  -7  -6   0    2.85    0.76
   7  -6   0    0.72    0.50
  -7  -6   0    1.06    0.56
   7  -6   0    2.05    0.85
   7  -6   0    3.97    1.15
   7  -6   0    3.50    1.05
  -7  -6   0    1.58    1.08
   7  -6   0    1.56    0.93
   7  -6   0    5.25    2.27
   7  -6   0    1.09    1.48
   7  -6   0   10.69    2.44
   7   6   0    2.72    0.94
   7   6   0   11.04    3.13
   7   6   0    4.08    1.11
   7   6   0    0.88    1.12
   7   6   0    9.96    2.23
  -7   6   0    0.70    0.43
  -7   6   0    2.88    0.75
   7   6   0    1.93    0.71
   7   6   0    0.09    1.36
   7   6   0    8.07    2.00
   7   6   0    1.54    0.74
   7   6   0    1.10    1.34
   8  -6   0    1.21    0.87
   8  -6   0    0.16    0.91
   8  -6   0    1.29    1.79
   8  -6   0    0.65    1.08
  -8  -6   0    1.09    1.18
  -8  -6   0    1.45    0.78
  -8  -6   0    2.29    1.37
   8  -6   0    1.55    0.85
  -8  -6   0    2.49    1.35
   8  -6   0    0.87    1.20
  -8  -6   0    0.89    0.58
  -8  -6   0    1.94    1.18
   8  -6   0    2.28    1.58
   8  -6   0    2.25    0.74
  -8  -6   0    1.56    0.78
   8  -6   0    1.60    1.89
   8  -6   0    1.22    0.91
   8   6   0    1.82    1.87
   8   6   0    2.11    1.04
   8   6   0    3.68    1.64
   8   6   0    0.73    1.98
   8   6   0    1.25    0.82
   8   6   0    1.22    0.69
   8   6   0    0.98    0.80
   8   6   0    1.06    1.36
  -8   6   0    1.14    0.65
  -8   6   0    1.97    0.62
   8   6   0    0.84    1.15
   9  -6   0    1.85    0.77
  -9  -6   0    1.40    0.85
   9  -6   0    1.11    1.50
  -9  -6   0    2.12    0.91
   9  -6   0   -0.25    2.11
   9  -6   0    1.31    0.91
   9  -6   0    1.53    1.05
   9  -6   0    1.77    1.51
   9  -6   0    0.83    0.96
   9   6   0    1.27    0.73
   9   6   0    1.45    1.00
   9   6   0    2.19    1.05
   9   6   0    1.91    1.20
  -9   6   0    1.07    0.71
  10  -6   0    1.15    1.06
 -10  -6   0    1.52    0.89
  10  -6   0    1.75    0.88
 -10  -6   0    1.29    0.90
  10  -6   0    0.80    0.85
  10   6   0    1.14    1.07
 -10   6   0    1.11    0.88
  10   6   0    1.56    0.92
  11  -6   0    1.20    1.09
  11  -6   0   -0.30    0.81
 -11  -6   0    0.69    0.75
 -11  -6   0    1.94    1.18
  11   6   0    0.19    1.11
  11   6   0    1.44    1.08
 -11   6   0    0.77    0.79
   0  -7   0    0.39    0.15
   0   7   0    0.33    0.17
   1  -7   0    5.01    0.58
   1  -7   0    6.51    0.39
  -1  -7   0    5.50    0.54
  -1  -7   0    4.94    0.83
  -1  -7   0    5.77    0.60
  -1  -7   0    5.92    0.63
  -1  -7   0    4.68    0.75
   1  -7   0    5.96    0.71
  -1  -7   0    5.19    0.88
  -1  -7   0    4.98    1.05
  -1  -7   0    5.61    0.60
   1  -7   0    5.07    0.35
  -1  -7   0    6.01    0.50
  -1  -7   0    7.20    0.62
   1   7   0    5.90    0.57
   1   7   0    5.64    0.50
   1   7   0    6.10    0.87
  -1   7   0    5.57    0.38
   1   7   0    4.59    0.51
   1   7   0    4.00    0.92
   1   7   0    6.10    0.63
  -1   7   0    5.28    0.59
  -2  -7   0   21.48    1.64
  -2  -7   0   21.82    1.41
   2  -7   0   21.08    1.07
   2  -7   0   19.85    1.04
  -2  -7   0   20.16    1.68
   2  -7   0   19.42    1.33
   2  -7   0   20.27    1.37
  -2  -7   0   18.95    1.83
  -2  -7   0   20.78    2.18
   2  -7   0   20.26    1.22
  -2  -7   0   20.54    1.23
   2  -7   0   17.94    1.17
  -2  -7   0   21.01    2.20
   2  -7   0   19.70    1.10
  -2  -7   0   18.34    1.69
   2  -7   0   20.91    1.12
  -2  -7   0   20.46    1.30
   2   7   0   16.41    1.60
   2   7   0   20.61    1.84
  -2   7   0   21.85    1.40
   2   7   0   20.16    1.30
   2   7   0   20.67    1.31
  -2   7   0   20.85    1.37
   2   7   0   20.57    1.47
   2   7   0   21.92    2.33
   2   7   0   19.31    1.35
  -2   7   0   18.90    1.10
   2   7   0   21.96    1.29
   2   7   0   20.52    1.27
   2   7   0   20.40    1.45
   2   7   0   21.14    1.89
  -3  -7   0   46.75    4.13
   3  -7   0   48.75    2.64
  -3  -7   0   60.65    4.31
  -3  -7   0   51.67    3.68
   3  -7   0   52.08    2.47
   3  -7   0   47.21    3.31
   3  -7   0   53.00    2.61
   3  -7   0   52.57    2.60
  -3  -7   0   43.66    3.17
   3  -7   0   49.18    2.90
  -3  -7   0   51.99    2.74
  -3  -7   0   53.30    2.94
  -3  -7   0   47.37    3.51
  -3  -7   0   49.38    2.81
   3  -7   0   54.53    2.62
  -3  -7   0   60.33    3.24
   3  -7   0   51.59    3.40
   3  -7   0   49.74    2.88
   3  -7   0   49.43    2.57
   3   7   0   53.98    4.46
   3   7   0   48.97    3.76
   3   7   0   48.63    2.75
  -3   7   0   52.86    2.61
  -3   7   0   52.16    2.90
   3   7   0   53.58    2.87
   3   7   0   48.08    3.70
   3   7   0   51.31    3.17
  -3   7   0   53.59    2.61
  -3   7   0   54.74    2.98
   3   7   0   50.50    3.25
   3   7   0   46.15    3.47
   3   7   0   56.62    3.32
   4  -7   0   36.11    2.45
   4  -7   0   40.05    2.40
  -4  -7   0   38.23    2.75
  -4  -7   0   41.54    3.54
   4  -7   0   41.38    2.60
   4  -7   0   40.49    2.44
   4  -7   0   44.79    2.79
  -4  -7   0   35.04    3.49
   4  -7   0   38.51    2.53
  -4  -7   0   36.96    2.70
  -4  -7   0   41.04    4.11
  -4  -7   0   38.25    3.00
   4  -7   0   40.28    2.32
   4  -7   0   35.53    3.35
  -4  -7   0   39.27    2.53
  -4  -7   0   43.67    3.55
  -4  -7   0   41.62    2.35
   4  -7   0   44.10    3.59
  -4  -7   0   35.65    2.36
   4  -7   0   37.15    2.13
   4  -7   0   36.72    2.15
   4   7   0   48.42    3.27
   4   7   0   32.82    3.29
   4   7   0   35.33    2.30
  -4   7   0   37.03    1.91
   4   7   0   36.34    2.39
  -4   7   0   39.78    2.21
   4   7   0   37.14    3.23
   4   7   0   41.95    2.99
  -4   7   0   37.46    1.98
   4   7   0   30.31    4.37
   4   7   0   40.47    2.47
  -4   7   0   41.81    2.15
  -4   7   0   39.01    2.21
  -4   7   0   36.75    2.45
  -5  -7   0  105.55    5.64
   5  -7   0  125.49    6.36
   5  -7   0  111.12    5.82
   5  -7   0   98.71    7.42
  -5  -7   0   90.44    7.72
   5  -7   0  108.23    5.59
  -5  -7   0  103.04    5.47
   5  -7   0  101.05    6.40
  -5  -7   0   97.44    7.02
   5  -7   0  110.08    5.38
  -5  -7   0   96.23    6.97
   5  -7   0  104.92    5.82
   5  -7   0  115.58    5.81
  -5  -7   0  122.85    6.30
  -5  -7   0  110.16    6.31
   5  -7   0   95.10    6.24
   5  -7   0  109.53    7.54
  -5  -7   0  119.96    7.51
   5  -7   0  108.70    5.69
  -5  -7   0  110.67    5.99
  -5  -7   0  109.79    5.83
  -5   7   0  105.73    5.74
  -5   7   0  105.99    5.38
   5   7   0  112.53    5.82
  -5   7   0  117.04    5.31
   5   7   0  118.69    8.20
   5   7   0  102.23    6.89
   5   7   0  102.11    6.45
   5   7   0  100.99    5.64
   5   7   0  107.92    6.69
   5   7   0  101.19    8.22
   5   7   0  103.28    7.22
  -5   7   0  107.75    5.67
  -5   7   0  117.31    5.15
  -5   7   0  116.83    5.46
   5   7   0  110.83    5.76
   5   7   0  103.02    5.53
  -6  -7   0   57.59    5.12
  -6  -7   0   63.82    3.94
   6  -7   0   63.13    3.77
  -6  -7   0   49.35    4.87
   6  -7   0   63.05    4.69
  -6  -7   0   57.45    3.56
   6  -7   0   61.29    3.99
   6  -7   0   68.71    4.05
   6  -7   0   67.44    5.06
  -6  -7   0   62.85    4.28
  -6  -7   0   66.45    6.36
   6  -7   0   66.77    4.22
   6  -7   0   56.25    3.41
   6  -7   0   62.51    5.81
  -6  -7   0   65.18    4.23
   6  -7   0   55.70    4.68
  -6  -7   0   66.41    3.84
   6  -7   0   58.49    5.92
  -6  -7   0   69.11    5.34
   6  -7   0   52.53    3.73
   6   7   0   76.45    6.57
   6   7   0   62.72    4.73
   6   7   0   60.40    3.64
   6   7   0   63.84    3.88
   6   7   0   64.56    4.94
   6   7   0   60.38    3.83
   6   7   0   56.93    6.38
  -6   7   0   61.25    3.21
   6   7   0   61.85    5.16
  -6   7   0   59.94    3.47
   6   7   0   60.52    3.86
   6   7   0   58.14    5.36
  -7  -7   0   76.55    4.74
  -7  -7   0   51.63    5.12
  -7  -7   0   67.19    4.30
   7  -7   0   56.08    3.57
  -7  -7   0   70.71    5.53
   7  -7   0   61.12    6.78
   7  -7   0   67.35    4.87
  -7  -7   0   62.70    3.74
   7  -7   0   62.08    3.97
   7  -7   0   66.20    4.30
  -7  -7   0   58.15    3.86
   7  -7   0   54.89    6.10
   7  -7   0   59.18    4.03
  -7  -7   0   56.60    5.31
   7  -7   0   61.83    5.27
  -7  -7   0   68.67    4.08
   7  -7   0   52.31    5.08
   7  -7   0   60.43    5.40
  -7  -7   0   63.01    6.65
   7   7   0   62.65    3.84
   7   7   0   53.11    7.83
   7   7   0   64.27    4.17
   7   7   0   65.03    4.09
   7   7   0   62.30    6.60
  -7   7   0   59.11    3.60
   7   7   0   58.19    5.48
   7   7   0   53.19    3.90
   7   7   0   56.64    4.90
   7   7   0   58.69    5.12
  -7   7   0   66.02    3.37
   7   7   0   60.29    5.86
   8  -7   0   43.06    3.54
   8  -7   0   40.01    3.31
  -8  -7   0   50.15    5.29
   8  -7   0   44.87    5.68
   8  -7   0   45.36    5.75
  -8  -7   0   39.41    2.98
   8  -7   0   37.31    3.13
   8  -7   0   38.06    5.36
  -8  -7   0   39.73    5.16
   8  -7   0   47.71    4.51
   8  -7   0   41.70    2.93
  -8  -7   0   42.79    6.05
  -8  -7   0   50.13    3.49
   8  -7   0   37.47    6.36
  -8  -7   0   45.58    3.83
   8  -7   0   32.65    6.44
  -8  -7   0   39.77    3.11
   8   7   0   45.11    4.45
   8   7   0   44.63    4.58
  -8   7   0   40.88    2.89
   8   7   0   44.69    3.38
   8   7   0   40.86    3.25
   8   7   0   39.91    3.05
  -8   7   0   40.16    2.52
   8   7   0   46.09    3.57
  -9  -7   0   33.14    2.66
   9  -7   0   33.88    5.69
   9  -7   0   28.02    6.50
   9  -7   0   30.92    3.40
   9  -7   0   25.39    2.34
   9  -7   0   28.76    3.26
   9  -7   0   33.46    4.97
   9  -7   0   23.23    3.18
  -9  -7   0   30.17    2.71
   9   7   0   31.61    2.94
   9   7   0   32.34    3.61
   9   7   0   28.22    2.97
  -9   7   0   28.30    2.40
 -10  -7   0   24.45    2.84
 -10  -7   0   24.69    3.05
  10  -7   0   26.23    3.29
  10  -7   0   22.47    3.11
  10  -7   0   27.41    2.91
 -10   7   0   24.71    2.76
  10   7   0   26.41    3.05
  10   7   0   26.18    3.25
  11  -7   0    5.19    1.70
 -11  -7   0    8.57    1.92
 -11  -7   0    7.39    1.76
  11  -7   0    9.30    2.53
  11   7   0    8.53    1.91
  11   7   0    5.46    1.76
 -11   7   0    6.29    1.42
   0  -8   0  102.71    4.59
   0  -8   0  105.26    4.43
   0  -8   0  101.58    4.52
   0  -8   0  103.34    4.45
   0  -8   0  102.57    4.67
   0   8   0   98.53    4.64
   0   8   0   90.97    4.50
   0   8   0   96.14    4.57
   1  -8   0    3.02    0.46
  -1  -8   0    5.28    0.91
  -1  -8   0    1.76    0.39
  -1  -8   0    1.47    0.54
  -1  -8   0    1.95    0.73
  -1  -8   0    2.02    0.33
  -1  -8   0    2.65    0.40
  -1  -8   0    3.58    0.51
  -1  -8   0    1.30    0.44
   1  -8   0    3.82    0.29
   1  -8   0    2.61    0.51
  -1  -8   0    3.32    0.50
   1   8   0    2.72    0.62
   1   8   0    3.46    0.44
  -1   8   0    3.22    0.45
  -1   8   0    3.45    0.28
   1   8   0    2.84    0.74
   1   8   0    2.11    0.38
   1   8   0    4.37    0.44
  -2  -8   0    9.79    0.82
  -2  -8   0    8.92    1.67
   2  -8   0    9.74    1.01
   2  -8   0    8.91    0.63
   2  -8   0    9.31    0.55
   2  -8   0   11.99    0.69
   2  -8   0    9.99    0.61
  -2  -8   0    9.51    1.46
  -2  -8   0    9.05    1.34
  -2  -8   0   10.19    0.78
  -2  -8   0   11.18    0.95
   2  -8   0    9.58    0.57
  -2  -8   0   15.26    1.25
   2  -8   0    9.06    0.62
   2  -8   0   11.08    0.92
   2   8   0    9.03    0.63
  -2   8   0    9.56    1.01
   2   8   0   10.40    0.92
  -2   8   0    7.97    0.60
   2   8   0   11.51    0.87
  -2   8   0    9.71    0.65
   2   8   0    8.76    1.71
   2   8   0   11.48    0.83
   2   8   0   12.28    1.01
   2   8   0   11.77    0.84
   2   8   0    7.35    1.09
   2   8   0   15.13    1.52
   2   8   0    8.68    0.59
   2   8   0   10.69    1.45
   2   8   0   12.11    0.91
  -2   8   0   11.61    0.93
   3  -8   0   67.92    3.18
   3  -8   0   63.97    3.60
   3  -8   0   66.25    2.99
   3  -8   0   64.36    4.00
   3  -8   0   65.58    3.25
  -3  -8   0   63.46    3.59
   3  -8   0   68.59    3.99
  -3  -8   0   67.88    4.36
  -3  -8   0   72.27    3.88
   3  -8   0   67.81    3.31
  -3  -8   0   67.34    3.42
  -3  -8   0   65.17    4.37
  -3  -8   0   65.77    3.51
  -3  -8   0   64.21    4.84
   3  -8   0   67.52    3.27
   3  -8   0   62.37    3.00
   3  -8   0   66.80    3.63
  -3  -8   0   71.51    4.37
  -3  -8   0   64.71    5.03
   3   8   0   67.95    3.83
   3   8   0   69.56    3.55
   3   8   0   63.75    3.45
   3   8   0   76.67    4.75
   3   8   0   59.19    4.36
   3   8   0   62.41    3.80
  -3   8   0   71.80    3.29
   3   8   0   67.00    3.90
   3   8   0   61.47    5.07
  -3   8   0   68.58    3.26
  -3   8   0   69.93    3.62
  -3   8   0   72.62    3.68
   3   8   0   57.23    4.14
  -4  -8   0    2.52    0.83
   4  -8   0    3.08    0.73
  -4  -8   0    3.34    1.46
   4  -8   0    3.48    1.15
  -4  -8   0    4.75    1.34
  -4  -8   0    3.12    0.68
   4  -8   0    3.19    0.74
  -4  -8   0    2.33    0.69
   4  -8   0    2.86    0.61
   4  -8   0    3.86    0.80
   4  -8   0    1.68    0.89
   4  -8   0    2.30    0.58
   4  -8   0    3.58    0.56
  -4  -8   0    3.73    0.93
   4  -8   0    2.84    0.57
   4  -8   0    3.87    0.69
  -4  -8   0    2.64    0.56
  -4  -8   0    1.73    0.78
  -4  -8   0    3.47    1.20
   4  -8   0    2.57    0.42
  -4   8   0    3.34    0.56
  -4   8   0    2.17    0.67
   4   8   0    3.54    0.90
   4   8   0    2.30    0.65
   4   8   0    2.96    0.93
   4   8   0    2.70    1.16
   4   8   0    2.23    1.00
   4   8   0    4.35    1.66
   4   8   0    3.67    0.97
   4   8   0    2.86    0.63
   4   8   0    3.50    1.27
   4   8   0    3.20    0.69
  -4   8   0    3.26    0.55
   5  -8   0    1.42    1.04
  -5  -8   0    1.47    0.71
   5  -8   0    1.87    1.11
   5  -8   0    1.79    0.76
  -5  -8   0    2.16    0.91
  -5  -8   0    2.43    1.21
   5  -8   0    2.11    0.74
   5  -8   0    1.58    0.61
   5  -8   0    2.27    0.73
  -5  -8   0    2.77    0.86
  -5  -8   0    2.81    1.24
  -5  -8   0    1.49    1.34
   5  -8   0    3.04    0.83
   5  -8   0    1.84    0.54
  -5  -8   0    1.84    0.61
  -5  -8   0    2.77    0.68
   5  -8   0    3.02    0.59
  -5  -8   0    2.03    1.08
   5  -8   0    3.51    0.85
   5  -8   0    2.24    0.88
  -5  -8   0    1.90    0.88
  -5   8   0    2.92    0.40
  -5   8   0    3.40    0.40
   5   8   0    2.89    1.02
   5   8   0    1.10    1.29
   5   8   0    1.82    0.71
   5   8   0    2.61    0.73
  -5   8   0    2.23    0.72
   5   8   0    1.89    0.58
   5   8   0    2.21    1.12
  -5   8   0    2.15    0.60
  -5   8   0    2.94    0.61
   5   8   0    1.63    0.79
   5   8   0    1.34    1.09
  -5   8   0    2.52    0.58
  -6  -8   0   -0.04    0.36
   6  -8   0    0.70    0.54
   6  -8   0    2.23    1.35
  -6  -8   0    0.46    0.53
   6  -8   0    0.60    0.65
   6  -8   0    0.14    0.31
  -6  -8   0    2.32    1.61
  -6  -8   0    2.45    1.20
   6  -8   0   -0.28    0.48
   6  -8   0    0.97    0.66
   6  -8   0    0.55    1.05
  -6  -8   0    0.88    0.52
  -6  -8   0    1.70    1.08
   6  -8   0    0.34    0.45
  -6  -8   0    0.06    0.39
   6  -8   0    1.33    0.72
   6  -8   0    2.87    1.14
   6  -8   0    2.91    1.17
  -6  -8   0   -0.26    0.68
  -6  -8   0    0.07    0.79
   6   8   0    0.09    1.15
   6   8   0    0.44    0.55
  -6   8   0    0.78    0.44
   6   8   0    3.42    1.28
   6   8   0    1.17    0.73
   6   8   0    0.18    0.89
   6   8   0    2.03    0.95
   6   8   0    0.80    0.50
   6   8   0    0.59    0.95
  -6   8   0   -0.01    0.23
   7  -8   0    5.35    1.75
   7  -8   0    1.56    0.90
   7  -8   0    3.39    1.50
   7  -8   0    4.34    2.09
   7  -8   0    0.12    0.81
  -7  -8   0    3.40    2.10
   7  -8   0    0.42    0.63
  -7  -8   0    1.44    0.67
  -7  -8   0    4.99    1.81
   7  -8   0    0.13    0.64
   7  -8   0    1.67    1.63
  -7  -8   0    0.69    0.55
  -7  -8   0    0.29    0.94
   7  -8   0    0.64    0.49
   7  -8   0    0.72    0.70
  -7  -8   0    0.49    0.53
  -7  -8   0    0.06    0.52
  -7  -8   0   -0.47    0.77
   7   8   0    1.30    1.33
   7   8   0    2.46    0.92
   7   8   0    1.91    0.94
   7   8   0    5.25    1.60
  -7   8   0    1.25    0.62
   7   8   0    1.39    0.68
   7   8   0    0.03    1.08
  -7   8   0    0.25    0.31
   7   8   0    1.59    1.86
   7   8   0    3.21    1.32
   8  -8   0    0.78    1.24
   8  -8   0    0.66    1.52
   8  -8   0    1.10    0.89
   8  -8   0    2.01    0.73
  -8  -8   0    2.82    1.78
   8  -8   0    1.34    1.15
  -8  -8   0    1.43    0.74
   8  -8   0    1.82    1.70
  -8  -8   0    0.97    0.72
   8  -8   0    1.18    0.89
  -8  -8   0    1.65    0.84
   8  -8   0    3.36    1.82
   8  -8   0    0.45    1.18
   8  -8   0    2.37    0.98
  -8   8   0    1.73    0.71
   8   8   0    1.77    1.30
   8   8   0    1.92    1.27
   8   8   0    0.85    0.79
  -8   8   0    1.35    0.55
   8   8   0    0.52    0.81
   8   8   0    2.11    0.82
   9  -8   0    6.09    2.26
   9  -8   0   11.52    2.05
   9  -8   0    7.19    1.82
   9  -8   0    7.14    1.37
   9  -8   0    8.46    3.01
   9  -8   0    9.49    1.92
  -9  -8   0    8.74    1.68
  -9  -8   0   10.82    1.71
   9  -8   0   11.89    4.48
   9   8   0    9.57    1.62
   9   8   0    9.96    1.85
   9   8   0   10.88    2.13
 -10  -8   0    5.07    1.33
  10  -8   0    4.46    1.48
  10  -8   0    4.94    1.30
 -10  -8   0    3.91    1.33
  10  -8   0    4.61    1.50
  10   8   0    3.66    1.44
 -10   8   0    3.46    1.11
  10   8   0    3.88    1.29
  11  -8   0    6.95    2.18
  11  -8   0    4.10    1.51
 -11  -8   0    3.42    1.38
 -11  -8   0    4.43    1.26
  11   8   0    4.00    1.67
 -11   8   0    2.19    1.04
  11   8   0    5.23    1.56
   0  -9   0    0.31    0.16
   0  -9   0    0.21    0.11
   0  -9   0    0.30    0.13
   0  -9   0   -0.05    0.19
   0  -9   0    0.24    0.25
   0  -9   0    0.12    0.19
   0  -9   0    0.07    0.11
   0   9   0   -0.08    0.14
   0   9   0    0.26    0.16
   0   9   0    0.10    0.11
  -1  -9   0    4.07    0.57
  -1  -9   0    4.00    1.00
  -1  -9   0    4.42    0.90
   1  -9   0    3.33    0.29
  -1  -9   0    2.80    0.67
  -1  -9   0    4.12    0.57
   1  -9   0    4.81    0.37
  -1  -9   0    3.69    0.53
   1  -9   0    3.73    0.64
  -1  -9   0    3.90    0.61
   1  -9   0    4.66    0.58
  -1  -9   0    3.64    0.47
  -1  -9   0    3.22    0.41
  -1  -9   0    2.69    0.54
  -1   9   0    3.44    0.49
   1   9   0    4.20    0.43
   1   9   0    4.28    0.50
   1   9   0    3.74    0.83
   1   9   0    3.70    0.70
   1   9   0    5.79    0.58
   1   9   0    4.36    0.53
  -1   9   0    4.25    0.33
  -2  -9   0   22.11    1.58
  -2  -9   0   19.76    1.64
   2  -9   0   20.61    1.10
  -2  -9   0   17.12    1.91
   2  -9   0   20.43    1.11
   2  -9   0   21.13    1.38
   2  -9   0   16.28    1.34
  -2  -9   0   18.31    2.47
  -2  -9   0   19.73    1.24
   2  -9   0   21.21    0.96
  -2  -9   0   18.92    1.32
   2  -9   0   20.20    0.96
  -2  -9   0   20.01    1.97
  -2  -9   0   20.12    1.59
  -2  -9   0   18.65    1.79
   2   9   0   18.99    1.44
   2   9   0   20.11    1.32
   2   9   0   18.04    1.26
   2   9   0   19.61    1.34
   2   9   0   23.42    1.97
   2   9   0   19.41    2.63
   2   9   0   19.27    1.68
  -2   9   0   20.28    1.45
  -2   9   0   20.60    1.40
   2   9   0   19.27    1.27
   2   9   0   21.14    1.31
  -2   9   0   20.38    1.10
   3  -9   0   55.22    2.73
  -3  -9   0   50.07    2.83
  -3  -9   0   58.49    3.34
  -3  -9   0   52.38    2.96
  -3  -9   0   50.90    4.39
   3  -9   0   55.77    2.68
  -3  -9   0   52.88    3.75
  -3  -9   0   56.15    3.71
  -3  -9   0   54.13    3.60
   3  -9   0   51.55    3.03
   3  -9   0   53.14    2.45
   3  -9   0   53.71    3.06
  -3  -9   0   54.71    4.36
   3  -9   0   54.80    2.69
  -3  -9   0   54.06    3.08
   3  -9   0   52.59    2.41
  -3  -9   0   58.19    3.92
   3  -9   0   47.72    3.27
   3  -9   0   53.85    3.25
   3   9   0   52.80    3.13
   3   9   0   53.78    2.95
   3   9   0   48.99    3.57
  -3   9   0   57.71    3.10
  -3   9   0   53.68    3.08
   3   9   0   47.48    4.39
   3   9   0   49.76    2.88
   3   9   0   54.10    3.27
   3   9   0   65.07    4.17
   3   9   0   49.22    3.78
  -3   9   0   56.04    2.71
  -4  -9   0   68.79    3.83
   4  -9   0   70.54    3.68
  -4  -9   0   65.26    3.64
   4  -9   0   62.20    3.72
   4  -9   0   56.13    4.49
  -4  -9   0   69.00    4.24
  -4  -9   0   70.36    4.95
   4  -9   0   66.12    3.43
  -4  -9   0   63.68    4.03
   4  -9   0   66.41    3.51
  -4  -9   0   67.39    4.82
  -4  -9   0   67.42    3.54
   4  -9   0   67.16    3.43
   4  -9   0   59.31    4.46
  -4  -9   0   63.36    5.10
  -4  -9   0   63.35    5.53
   4  -9   0   65.70    3.16
   4  -9   0   60.77    3.72
   4  -9   0   63.16    3.46
   4  -9   0   64.75    3.36
   4  -9   0   63.36    3.33
   4   9   0   67.05    3.66
   4   9   0   62.19    3.55
  -4   9   0   70.54    3.39
   4   9   0   68.81    4.12
  -4   9   0   65.45    3.72
   4   9   0   62.81    3.59
   4   9   0   58.97    5.52
   4   9   0   67.98    4.17
  -4   9   0   69.38    3.39
   4   9   0   59.20    4.51
   4   9   0   71.62    4.28
   4   9   0   68.02    5.00
   4   9   0   73.20    5.06
  -5  -9   0   37.46    3.88
  -5  -9   0   37.33    2.71
   5  -9   0   34.48    3.80
   5  -9   0   40.94    3.09
   5  -9   0   36.55    2.74
  -5  -9   0   39.66    3.85
  -5  -9   0   36.59    2.43
   5  -9   0   37.76    2.47
   5  -9   0   40.31    2.96
   5  -9   0   36.97    2.58
   5  -9   0   41.38    2.74
   5  -9   0   40.29    2.44
  -5  -9   0   47.23    3.27
   5  -9   0   37.91    3.84
  -5  -9   0   30.23    4.78
  -5  -9   0   34.76    3.68
  -5  -9   0   45.18    3.09
   5  -9   0   37.53    2.73
  -5  -9   0   40.22    3.24
   5  -9   0   37.05    2.28
  -5  -9   0   38.12    2.58
   5   9   0   38.64    2.61
  -5   9   0   39.81    2.33
   5   9   0   36.62    3.14
  -5   9   0   40.92    2.33
   5   9   0   39.11    2.53
   5   9   0   42.08    3.33
   5   9   0   39.67    3.97
   5   9   0   39.05    2.63
  -5   9   0   37.88    2.65
   5   9   0   40.68    5.78
   5   9   0   39.80    3.91
   5   9   0   33.80    3.48
   5   9   0   39.02    3.11
   6  -9   0   29.40    2.42
   6  -9   0   28.03    2.42
   6  -9   0   24.21    4.22
   6  -9   0   31.72    2.47
  -6  -9   0   33.80    5.35
  -6  -9   0   31.58    4.23
  -6  -9   0   35.87    4.54
   6  -9   0   27.41    2.20
  -6  -9   0   29.79    2.15
   6  -9   0   27.47    3.42
  -6  -9   0   32.42    2.35
   6  -9   0   27.74    1.96
  -6  -9   0   24.80    3.83
   6  -9   0   29.83    2.89
   6  -9   0   32.62    3.12
   6  -9   0   29.33    4.43
   6  -9   0   28.42    2.36
  -6  -9   0   31.33    2.79
  -6  -9   0   29.80    2.52
  -6  -9   0   36.63    3.02
   6   9   0   24.24    2.09
   6   9   0   31.58    4.49
   6   9   0   28.72    3.44
   6   9   0   27.99    2.32
   6   9   0   23.18    3.60
  -6   9   0   28.97    2.00
   6   9   0   28.32    2.30
   6   9   0   29.81    2.91
   6   9   0   28.62    2.99
   6   9   0   24.90    4.85
  -6   9   0   28.02    1.42
  -7  -9   0    5.95    1.15
   7  -9   0    6.76    2.07
   7  -9   0    6.79    1.60
  -7  -9   0    7.98    2.24
   7  -9   0    8.37    1.54
  -7  -9   0    3.67    2.14
   7  -9   0    5.75    1.41
  -7  -9   0    7.35    1.36
  -7  -9   0    6.64    2.17
   7  -9   0    5.73    1.86
  -7  -9   0    6.57    1.51
   7  -9   0    5.03    1.73
   7  -9   0    5.99    1.27
  -7  -9   0    5.38    1.22
  -7  -9   0    5.19    2.04
   7  -9   0    7.13    1.15
   7  -9   0    1.17    1.71
   7  -9   0    8.10    2.74
   7   9   0    7.15    1.42
   7   9   0    9.36    1.57
   7   9   0    7.66    1.97
   7   9   0    4.50    2.07
   7   9   0    4.86    1.94
   7   9   0    5.85    1.77
  -7   9   0    5.47    0.58
   7   9   0    5.55    2.88
   7   9   0    8.18    1.92
   7   9   0    6.34    1.22
  -7   9   0    6.64    1.11
  -8  -9   0   32.63    3.05
   8  -9   0   37.56    5.09
   8  -9   0   35.04    2.54
   8  -9   0   36.81    3.06
   8  -9   0   26.22    5.67
   8  -9   0   37.72    5.20
   8  -9   0   32.81    3.10
   8  -9   0   39.85    5.34
  -8  -9   0   42.38    3.11
   8  -9   0   40.15    4.03
   8  -9   0   35.14    5.91
  -8  -9   0   32.17    2.85
  -8  -9   0   33.78    2.66
   8  -9   0   33.76    2.89
   8   9   0   37.18    2.79
   8   9   0   33.60    4.26
   8   9   0   36.11    3.12
   8   9   0   36.25    4.57
   8   9   0   30.22    2.89
  -8   9   0   33.35    2.52
  -9  -9   0   15.12    2.29
   9  -9   0   12.89    3.55
   9  -9   0   10.04    5.65
   9  -9   0   15.82    2.51
   9  -9   0   14.56    2.30
   9  -9   0   14.17    1.89
  -9  -9   0   13.30    1.93
   9  -9   0   10.09    4.08
   9  -9   0   11.29    2.01
  -9   9   0   13.60    1.83
   9   9   0   14.63    2.29
   9   9   0   15.08    2.51
   9   9   0   13.78    2.05
 -10  -9   0    7.18    1.53
  10  -9   0    7.40    1.77
  10  -9   0    8.13    1.86
 -10  -9   0    8.82    1.84
  10   9   0    6.70    1.62
  10   9   0    7.11    1.82
 -10   9   0    8.06    1.53
 -11  -9   0    0.21    0.96
 -11  -9   0    0.73    0.86
  11  -9   0    2.05    1.41
 -11   9   0    1.61    0.93
  11   9   0    1.36    1.20
  11   9   0    0.67    0.79
   0 -10   0   85.92    4.90
   0 -10   0  105.30    4.75
   0 -10   0  107.84    4.57
   0 -10   0  102.87    4.57
   0 -10   0  103.63    4.64
   0 -10   0   88.31    4.89
   0 -10   0  106.77    4.51
   0  10   0   96.62    4.62
   0  10   0  103.46    4.73
   0  10   0  101.49    4.57
  -1 -10   0   30.63    2.23
   1 -10   0   26.26    1.29
  -1 -10   0   23.18    2.23
  -1 -10   0   25.95    1.43
  -1 -10   0   27.95    1.62
   1 -10   0   25.00    1.54
  -1 -10   0   26.49    1.68
  -1 -10   0   22.10    1.83
  -1 -10   0   30.72    1.58
   1 -10   0   27.64    1.37
  -1 -10   0   26.73    1.53
  -1 -10   0   23.96    1.59
   1  10   0   25.20    1.84
  -1  10   0   25.21    1.31
   1  10   0   24.57    1.73
  -1  10   0   24.87    1.50
   1  10   0   27.37    1.54
   1  10   0   25.94    1.32
   1  10   0   25.31    1.45
   1  10   0   27.84    1.42
  -2 -10   0   67.84    3.53
   2 -10   0   68.47    3.57
   2 -10   0   70.41    3.24
   2 -10   0   66.40    3.63
  -2 -10   0   67.57    4.19
  -2 -10   0   63.51    4.70
  -2 -10   0   70.61    3.86
  -2 -10   0   63.43    4.31
  -2 -10   0   72.28    3.42
  -2 -10   0   68.70    4.50
  -2 -10   0   72.63    3.96
   2 -10   0   69.10    3.21
  -2  10   0   64.58    3.53
  -2  10   0   69.74    3.22
   2  10   0   64.19    3.45
   2  10   0   64.01    3.39
   2  10   0   72.29    3.56
   2  10   0   63.01    4.67
   2  10   0   71.24    3.56
   2  10   0   78.80    4.35
   2  10   0   66.50    3.75
   2  10   0   69.80    3.47
  -3 -10   0   91.65    5.55
  -3 -10   0  103.70    5.73
  -3 -10   0  103.16    5.28
   3 -10   0   89.29    5.16
  -3 -10   0   97.16    5.02
   3 -10   0  103.05    4.59
  -3 -10   0   96.61    6.65
   3 -10   0   87.74    4.97
  -3 -10   0   97.96    4.89
  -3 -10   0  102.41    5.98
  -3 -10   0   91.03    5.67
   3 -10   0   92.57    4.93
  -3 -10   0  101.80    4.79
  -3 -10   0   89.40    6.35
   3 -10   0   95.36    4.54
   3 -10   0  101.21    4.54
   3 -10   0   99.92    5.03
   3  10   0   96.54    5.94
   3  10   0   88.04    6.58
  -3  10   0  101.64    5.03
   3  10   0   96.08    4.59
  -3  10   0  105.21    4.54
  -3  10   0   93.01    4.54
   3  10   0   92.12    4.79
   3  10   0   91.61    5.75
   3  10   0   87.68    4.78
   3  10   0  104.68    5.15
   3  10   0   88.09    5.43
   3  10   0   96.60    5.15
  -3  10   0  100.88    5.00
   3  10   0   97.27    4.80
   4 -10   0   40.98    2.11
   4 -10   0   45.17    3.61
  -4 -10   0   35.76    4.13
   4 -10   0   42.87    3.40
   4 -10   0   43.75    2.48
   4 -10   0   43.55    2.35
  -4 -10   0   41.25    2.64
  -4 -10   0   42.40    2.77
  -4 -10   0   41.01    2.51
  -4 -10   0   39.49    3.53
   4 -10   0   47.21    2.44
   4 -10   0   42.69    2.75
  -4 -10   0   46.59    3.30
   4 -10   0   42.98    2.05
   4 -10   0   45.07    2.47
   4 -10   0   42.91    2.45
   4 -10   0   40.43    2.73
  -4 -10   0   40.90    3.99
  -4 -10   0   36.40    3.51
   4 -10   0   44.61    2.34
  -4 -10   0   42.95    3.05
   4  10   0   45.70    2.64
   4  10   0   43.22    2.61
   4  10   0   42.10    3.00
   4  10   0   41.92    2.65
   4  10   0   39.73    4.37
   4  10   0   45.65    3.12
  -4  10   0   43.38    2.37
   4  10   0   41.49    3.73
   4  10   0   41.91    3.72
   4  10   0   41.93    2.95
  -4  10   0   46.81    2.38
   4  10   0   41.53    3.50
  -4  10   0   49.24    2.85
   5 -10   0    0.63    0.32
  -5 -10   0    0.72    0.60
  -5 -10   0   -0.57    0.59
   5 -10   0    0.48    0.80
  -5 -10   0    0.30    0.60
   5 -10   0    0.05    0.61
  -5 -10   0    0.30    0.43
   5 -10   0    0.61    0.46
  -5 -10   0   -0.16    0.40
   5 -10   0    0.68    0.50
   5 -10   0    0.61    0.34
   5 -10   0    0.26    0.48
  -5 -10   0   -0.23    0.66
  -5 -10   0    0.13    0.67
   5 -10   0    0.68    0.57
  -5 -10   0    0.72    0.59
  -5 -10   0   -0.31    0.89
   5 -10   0    0.54    0.54
  -5 -10   0   -0.05    0.35
   5 -10   0   -0.12    0.38
   5 -10   0    0.31    0.38
   5  10   0    1.51    1.23
  -5  10   0   -0.43    0.32
   5  10   0   -0.19    0.66
  -5  10   0    0.13    0.31
   5  10   0    0.53    0.54
   5  10   0    0.33    0.80
   5  10   0    0.61    0.80
  -5  10   0    0.27    0.34
   5  10   0    0.07    0.56
   5  10   0    0.85    0.64
   5  10   0    1.64    0.80
   5  10   0    0.21    0.42
   5  10   0    0.77    0.47
   6 -10   0    4.15    0.75
   6 -10   0    3.27    0.93
   6 -10   0    4.71    0.99
   6 -10   0    3.73    1.01
   6 -10   0   11.46    2.07
  -6 -10   0    3.94    1.20
  -6 -10   0    2.21    1.28
  -6 -10   0   11.21    3.05
   6 -10   0    2.56    0.86
  -6 -10   0    2.21    0.85
   6 -10   0   11.41    1.97
   6 -10   0   10.80    2.57
  -6 -10   0    2.58    0.78
   6 -10   0    1.69    0.89
  -6 -10   0    3.07    0.91
   6 -10   0    4.51    1.10
   6 -10   0    3.59    1.77
  -6  10   0    4.30    0.81
   6  10   0    4.31    1.01
  -6  10   0    4.32    0.92
   6  10   0    1.58    1.62
   6  10   0    7.81    1.61
   6  10   0    2.78    0.86
   6  10   0    3.58    0.85
   6  10   0    1.27    1.33
   6  10   0   10.02    2.47
   6  10   0    3.60    1.23
   6  10   0    7.28    1.63
   6  10   0    4.12    1.61
  -7 -10   0   30.36    2.60
   7 -10   0   26.64    2.73
  -7 -10   0   25.46    2.32
   7 -10   0   29.00    4.02
   7 -10   0   25.50    1.97
   7 -10   0   27.30    2.85
   7 -10   0   25.77    3.64
   7 -10   0   22.01    4.55
  -7 -10   0   25.81    4.29
  -7 -10   0   28.51    4.21
  -7 -10   0   23.03    5.00
   7 -10   0   25.83    2.85
  -7 -10   0   31.14    4.66
  -7 -10   0   28.19    2.74
   7 -10   0   26.98    2.32
   7 -10   0   26.32    3.71
  -7 -10   0   29.40    2.24
   7 -10   0   16.05    3.77
   7  10   0   28.24    3.56
   7  10   0   24.95    2.39
   7  10   0   26.75    3.53
   7  10   0   24.92    2.19
   7  10   0   30.33    4.40
   7  10   0   28.87    5.76
   7  10   0   25.11    4.45
   7  10   0   26.65    2.39
  -7  10   0   26.20    2.01
   7  10   0   22.76    3.35
   7  10   0   30.62    4.81
   8 -10   0   10.05    1.72
   8 -10   0   11.21    2.80
  -8 -10   0    9.02    1.68
  -8 -10   0    9.10    1.52
  -8 -10   0    9.08    1.88
  -8 -10   0   11.21    1.87
   8 -10   0   10.15    1.47
   8 -10   0   11.80    2.52
   8 -10   0   10.49    2.65
   8 -10   0   18.76    4.47
   8 -10   0    9.31    3.53
   8 -10   0   11.18    2.00
   8 -10   0   10.51    1.85
   8 -10   0    8.40    2.59
  -8  10   0   10.69    1.48
   8  10   0   10.69    1.93
   8  10   0   10.83    2.36
   8  10   0   10.79    1.69
   8  10   0   11.82    2.58
   8  10   0   12.48    1.95
   9 -10   0   -0.35    0.92
   9 -10   0    3.93    2.50
  -9 -10   0    0.27    0.72
   9 -10   0    1.99    0.95
   9 -10   0    0.57    0.66
   9 -10   0    1.44    0.98
   9 -10   0    0.75    1.56
   9 -10   0   -0.39    1.87
  -9 -10   0    0.76    0.62
   9  10   0    0.20    0.98
   9  10   0    1.38    0.89
   9  10   0    0.83    0.84
  -9  10   0    1.31    0.76
  10 -10   0   10.74    2.14
 -10 -10   0   12.46    2.01
  10 -10   0   16.02    2.59
 -10 -10   0   12.37    2.26
  10  10   0   15.23    2.37
  10  10   0    9.87    2.09
 -10  10   0   18.99    2.22
 -11 -10   0    8.35    1.95
  11 -10   0    8.98    2.10
 -11 -10   0    7.00    1.59
  11  10   0    6.35    1.79
 -11  10   0    8.75    1.60
  11  10   0    6.33    1.84
   0 -11   0    0.31    0.34
   0 -11   0    0.26    0.22
   0 -11   0    0.30    0.17
   0 -11   0    0.51    0.19
   0 -11   0    0.46    0.16
   0 -11   0    0.35    0.30
   0  11   0    0.10    0.18
   0  11   0    0.64    0.17
  -1 -11   0   24.87    1.55
  -1 -11   0   26.35    1.47
  -1 -11   0   26.08    2.12
   1 -11   0   25.38    1.50
  -1 -11   0   24.50    1.60
  -1 -11   0   23.61    1.38
   1 -11   0   25.44    1.29
  -1 -11   0   20.61    1.74
  -1 -11   0   20.65    1.41
   1 -11   0   23.96    1.19
  -1 -11   0   22.67    2.20
  -1 -11   0   24.36    1.34
   1  11   0   24.41    1.36
  -1  11   0   22.25    1.21
   1  11   0   22.13    1.40
   1  11   0   23.71    1.19
   1  11   0   22.14    1.37
   1  11   0   23.19    1.44
   1  11   0   22.94    1.15
  -1  11   0   23.76    1.42
  -2 -11   0   55.54    4.18
   2 -11   0   55.26    2.54
  -2 -11   0   53.98    3.18
  -2 -11   0   45.85    3.40
   2 -11   0   57.17    2.57
  -2 -11   0   52.56    2.73
   2 -11   0   51.19    2.88
  -2 -11   0   51.41    2.88
  -2 -11   0   48.43    3.71
   2 -11   0   56.38    3.06
  -2 -11   0   55.82    3.78
  -2 -11   0   51.20    3.19
   2  11   0   52.86    2.82
   2  11   0   55.18    2.62
   2  11   0   50.44    2.65
   2  11   0   49.19    3.93
   2  11   0   51.61    2.88
   2  11   0   55.99    2.82
  -2  11   0   52.68    2.53
   2  11   0   56.39    3.56
  -2  11   0   52.14    2.86
   2  11   0   48.26    2.69
   3 -11   0    4.90    0.58
   3 -11   0    6.15    0.63
  -3 -11   0    6.19    1.69
  -3 -11   0    7.12    0.83
  -3 -11   0    7.61    1.40
  -3 -11   0    5.12    1.27
  -3 -11   0    6.84    0.92
   3 -11   0   10.80    1.16
   3 -11   0    4.92    0.90
   3 -11   0    6.44    0.98
  -3 -11   0    6.62    1.11
  -3 -11   0    7.16    1.01
  -3  11   0    8.79    1.08
  -3  11   0    5.84    0.97
   3  11   0    6.72    1.81
  -3  11   0    4.36    0.54
   3  11   0    5.50    1.27
   3  11   0    8.80    1.00
   3  11   0    9.42    0.97
   3  11   0    5.67    1.10
   4 -11   0    1.62    0.47
   4 -11   0    0.70    0.67
  -4 -11   0    1.67    0.60
  -4 -11   0    2.71    1.08
  -4 -11   0    1.36    1.14
   4 -11   0    3.05    0.95
  -4 -11   0    2.93    0.97
   4 -11   0    1.57    0.45
  -4 -11   0    1.47    0.57
  -4 -11   0    0.15    0.28
  -4 -11   0    3.09    1.14
   4 -11   0    1.85    0.45
   4 -11   0    1.34    0.62
  -4 -11   0    1.25    0.47
   4 -11   0    1.08    0.35
  -4 -11   0    1.24    0.81
  -4 -11   0    0.44    0.81
   4 -11   0    1.32    0.29
   4  11   0    1.48    0.55
   4  11   0    1.90    0.96
  -4  11   0    0.89    0.36
   4  11   0    0.85    1.15
   4  11   0    1.65    0.58
   4  11   0    1.67    0.66
   4  11   0    1.57    0.94
  -4  11   0    2.19    0.63
   4  11   0    1.48    0.52
   4  11   0    0.69    0.50
   4  11   0    1.72    0.90
  -4  11   0    1.68    0.62
  -5 -11   0    7.30    1.92
  -5 -11   0    5.42    1.36
   5 -11   0    4.21    0.95
   5 -11   0    4.99    1.07
   5 -11   0    4.33    1.45
  -5 -11   0    2.90    0.81
   5 -11   0    5.23    0.97
  -5 -11   0    3.60    1.12
   5 -11   0    4.09    0.86
  -5 -11   0    5.36    1.65
   5 -11   0    2.97    0.75
  -5 -11   0    3.65    0.74
   5 -11   0    3.19    0.62
  -5 -11   0    3.85    1.26
   5 -11   0    3.76    0.92
   5 -11   0    6.53    1.72
   5 -11   0    4.43    0.84
  -5 -11   0    2.20    0.84
   5 -11   0    3.14    0.57
  -5 -11   0    4.73    1.87
   5  11   0    3.07    1.39
   5  11   0    4.49    1.12
   5  11   0    3.74    0.80
   5  11   0    2.88    1.77
  -5  11   0    3.83    0.94
   5  11   0    3.05    1.30
   5  11   0    8.18    2.06
  -5  11   0    3.16    0.61
   5  11   0    3.51    0.86
   5  11   0    5.13    1.18
   5  11   0    3.00    0.77
   5  11   0    2.52    0.98
  -5  11   0    3.50    0.64
   6 -11   0   19.88    2.25
  -6 -11   0   18.92    3.40
   6 -11   0   19.42    2.67
   6 -11   0   17.13    2.19
   6 -11   0   19.45    2.18
   6 -11   0   20.98    1.89
   6 -11   0   18.00    1.74
  -6 -11   0   22.60    4.45
  -6 -11   0   21.21    2.78
   6 -11   0   19.45    3.59
  -6 -11   0   22.04    2.19
  -6 -11   0   19.56    1.72
   6 -11   0   17.17    3.51
   6 -11   0   22.35    1.60
  -6 -11   0   20.92    3.66
   6 -11   0   22.45    2.93
  -6 -11   0   22.33    3.74
  -6 -11   0   17.73    2.04
   6 -11   0   20.24    2.65
  -6  11   0   20.28    1.57
   6  11   0   20.42    4.56
   6  11   0   18.10    3.35
   6  11   0   23.16    2.86
   6  11   0   19.30    1.72
   6  11   0   18.68    2.08
   6  11   0   16.89    2.04
   6  11   0   22.11    2.90
   6  11   0   20.54    2.77
  -6  11   0   21.79    1.60
   6  11   0   19.03    3.29
   6  11   0   18.95    3.46
   7 -11   0   15.58    3.61
  -7 -11   0   12.08    1.64
  -7 -11   0   15.83    2.36
   7 -11   0   15.29    2.31
   7 -11   0   15.01    2.06
   7 -11   0   16.39    2.87
   7 -11   0   15.75    1.68
  -7 -11   0   14.80    3.07
   7 -11   0   15.84    3.88
  -7 -11   0   18.85    2.40
  -7 -11   0   12.17    2.96
  -7 -11   0   17.79    3.53
  -7 -11   0   16.52    2.07
   7 -11   0    9.38    2.28
   7 -11   0   14.52    1.91
  -7 -11   0   17.03    4.19
   7 -11   0   12.44    2.53
   7 -11   0   15.39    2.17
   7  11   0    9.47    1.72
   7  11   0   18.55    2.80
   7  11   0   14.64    4.19
   7  11   0   15.22    2.53
   7  11   0   16.92    1.97
   7  11   0   10.63    2.94
   7  11   0   11.55    2.98
   7  11   0   12.74    2.43
   7  11   0   13.93    3.01
  -7  11   0   15.72    1.66
   7  11   0   13.88    1.96
   8 -11   0    1.17    0.61
  -8 -11   0    1.32    0.86
  -8 -11   0    0.47    0.67
  -8 -11   0    2.18    0.93
   8 -11   0    1.55    1.37
   8 -11   0    1.12    0.84
   8 -11   0    1.21    1.45
   8 -11   0    1.07    0.87
   8 -11   0    2.39    2.01
   8 -11   0    1.19    1.09
   8 -11   0    1.91    1.54
   8 -11   0    3.81    2.44
  -8 -11   0    1.52    0.67
   8 -11   0    1.20    0.99
   8  11   0    1.68    0.98
   8  11   0    1.63    0.73
   8  11   0    1.86    1.19
   8  11   0    0.59    0.89
  -8  11   0    0.81    0.58
  -9 -11   0    8.55    1.57
   9 -11   0    6.28    2.19
   9 -11   0    6.86    1.63
  -9 -11   0    8.22    1.78
   9 -11   0    3.39    2.07
   9 -11   0    5.91    1.47
   9 -11   0    6.37    3.11
   9 -11   0    7.07    3.62
   9 -11   0    5.90    1.56
   9  11   0    5.98    1.45
   9  11   0    4.08    1.42
  -9  11   0    5.83    1.20
   9  11   0    5.08    1.56
 -10 -11   0    1.43    1.09
  10 -11   0    0.38    0.88
 -10 -11   0    0.98    0.84
  10 -11   0    0.40    0.82
 -10  11   0    1.31    0.73
  10  11   0    0.83    0.97
  10  11   0    1.62    1.03
  11 -11   0    3.53    1.49
 -11 -11   0    2.66    1.19
 -11 -11   0    2.50    1.33
 -11  11   0    1.99    0.92
  11  11   0    3.20    1.55
  11  11   0    1.52    1.11
   0 -12   0  109.37    4.70
   0 -12   0  106.11    4.80
   0 -12   0  111.64    4.82
   0 -12   0  102.79    4.71
   0 -12   0  108.55    4.95
   0 -12   0   92.68    5.31
   0 -12   0   87.85    5.20
   0  12   0  100.36    4.78
   0  12   0  106.49    4.74
   0  12   0  103.01    4.89
  -1 -12   0   55.59    2.83
  -1 -12   0   60.53    3.83
  -1 -12   0   65.50    3.02
   1 -12   0   56.00    3.01
  -1 -12   0   56.47    3.96
  -1 -12   0   53.79    2.88
  -1 -12   0   59.41    2.86
  -1 -12   0   61.80    3.20
   1 -12   0   60.70    2.71
  -1 -12   0   60.09    3.13
  -1 -12   0   50.68    3.32
   1 -12   0   64.77    2.84
   1  12   0   56.98    2.86
  -1  12   0   58.99    2.96
   1  12   0   57.15    3.00
  -1  12   0   57.47    2.74
   1  12   0   62.04    2.91
  -1  12   0   50.23    2.66
  -2 -12   0  186.74   10.17
  -2 -12   0  175.92    9.71
  -2 -12   0  173.45    9.32
   2 -12   0  177.84    8.56
  -2 -12   0  160.96    9.43
  -2 -12   0  181.73    8.58
   2 -12   0  185.69    8.14
   2 -12   0  191.56    8.24
   2 -12   0  185.33    8.76
  -2 -12   0  188.19    9.00
  -2 -12   0  187.09    8.38
   2  12   0  179.88    8.53
   2  12   0  166.57    9.75
  -2  12   0  180.03    8.53
   2  12   0  193.95    8.48
   2  12   0  172.77    8.47
  -2  12   0  184.33    8.15
   2  12   0  178.38    8.34
   2  12   0  201.61    9.42
  -3 -12   0  144.05    8.83
   3 -12   0  143.08    6.61
  -3 -12   0  146.89    6.87
   3 -12   0  138.60    6.90
   3 -12   0  150.71    6.59
   3 -12   0  141.67    7.10
   3 -12   0  131.88    7.15
  -3 -12   0  150.84    7.42
  -3 -12   0  146.51    7.92
  -3 -12   0  147.09    7.76
  -3 -12   0  141.89    8.20
   3 -12   0  148.64    6.61
  -3 -12   0  142.31    7.04
  -3 -12   0  144.17    7.94
   3 -12   0  140.89    7.15
  -3 -12   0  141.86    9.01
   3  12   0  136.25    6.87
   3  12   0  141.22    7.20
  -3  12   0  143.35    6.55
  -3  12   0  145.87    6.62
   3  12   0  159.63    8.26
  -3  12   0  153.31    7.26
   3  12   0  144.85    7.72
   3  12   0  135.08    8.88
   3  12   0  145.25    6.98
   3  12   0  148.76    6.99
  -3  12   0  143.23    7.09
   4 -12   0  138.74    6.26
   4 -12   0  133.98    6.36
   4 -12   0  122.65    7.55
  -4 -12   0  140.33    7.96
  -4 -12   0  128.38    6.66
  -4 -12   0  132.54    6.49
   4 -12   0  143.02    6.34
   4 -12   0  133.54    6.01
  -4 -12   0  150.10    7.35
  -4 -12   0  115.10    7.63
  -4 -12   0  124.42    8.95
  -4 -12   0  120.92    8.43
  -4 -12   0  126.77    7.95
   4 -12   0  132.28    6.80
  -4 -12   0  144.65    6.96
   4 -12   0  123.42    6.05
   4 -12   0  128.98    6.76
   4 -12   0  122.05    7.25
   4 -12   0  140.65    6.27
   4  12   0  142.35    7.01
   4  12   0  114.00    8.81
   4  12   0  126.36    6.56
  -4  12   0  137.89    6.83
  -4  12   0  141.05    6.22
   4  12   0  138.37    6.58
   4  12   0  141.43    7.10
   4  12   0  130.15    6.28
   4  12   0  129.40    6.52
   4  12   0  138.81    8.17
   4  12   0  124.47    7.81
  -4  12   0  130.71    6.24
  -4  12   0  136.05    6.81
   4  12   0  133.05    6.61
   4  12   0  122.87    7.44
   5 -12   0    2.43    1.29
   5 -12   0    4.03    1.47
   5 -12   0    3.38    0.79
   5 -12   0    5.00    1.05
  -5 -12   0    4.58    1.64
  -5 -12   0    3.78    0.82
   5 -12   0    3.39    0.56
  -5 -12   0    2.27    1.38
   5 -12   0    3.97    0.98
   5 -12   0    2.75    0.69
   5 -12   0    3.34    0.76
  -5 -12   0    2.16    1.58
  -5 -12   0    4.35    1.21
   5 -12   0    3.66    0.65
   5 -12   0    3.26    0.85
  -5 -12   0    4.21    1.54
   5 -12   0    4.38    0.81
  -5 -12   0    2.77    0.82
  -5 -12   0    5.00    1.41
   5  12   0    3.26    0.75
   5  12   0    4.19    1.10
   5  12   0    4.36    0.98
   5  12   0    3.39    0.80
  -5  12   0    2.25    0.79
  -5  12   0    4.33    0.70
   5  12   0    2.72    0.93
   5  12   0    4.23    1.46
   5  12   0    6.56    1.86
   5  12   0    2.81    1.70
   5  12   0    5.11    1.65
   6 -12   0    5.86    1.41
   6 -12   0    9.17    2.42
  -6 -12   0    3.40    0.85
   6 -12   0    4.02    0.95
  -6 -12   0    4.46    1.33
   6 -12   0    4.02    1.03
   6 -12   0    9.07    1.80
   6 -12   0    3.22    1.07
   6 -12   0    2.44    1.41
   6 -12   0    3.48    1.01
  -6 -12   0    3.70    0.96
  -6 -12   0    8.43    2.88
   6 -12   0    5.59    1.25
  -6 -12   0    4.22    1.15
  -6 -12   0    7.15    2.12
  -6 -12   0    3.98    1.71
   6 -12   0    3.75    0.91
   6 -12   0    2.97    0.68
  -6 -12   0    5.08    1.74
   6  12   0    3.23    1.51
  -6  12   0    4.74    0.81
   6  12   0    3.62    2.08
   6  12   0    4.57    1.25
  -6  12   0    2.87    0.67
   6  12   0    6.13    1.23
   6  12   0    7.94    1.63
   6  12   0    3.55    0.96
   6  12   0    2.89    0.80
   6  12   0    2.86    1.60
   6  12   0    4.50    1.22
   6  12   0    5.76    1.93
  -7 -12   0   -0.51    0.42
   7 -12   0   -0.14    0.72
   7 -12   0    0.37    1.31
   7 -12   0   -0.09    0.34
  -7 -12   0   -0.16    0.50
  -7 -12   0   -0.15    0.97
  -7 -12   0   -0.34    0.53
   7 -12   0    0.24    0.76
  -7 -12   0   -0.36    1.25
   7 -12   0   -0.37    0.47
   7 -12   0   -0.76    0.42
   7 -12   0   -0.29    0.61
   7 -12   0    0.55    0.68
  -7 -12   0   -0.12    0.45
   7 -12   0    0.32    0.73
  -7 -12   0   -0.03    1.04
  -7 -12   0    0.53    0.98
   7 -12   0    0.72    1.18
   7  12   0    0.42    0.57
   7  12   0   -0.07    0.59
   7  12   0    0.71    0.80
   7  12   0   -0.77    1.24
   7  12   0   -0.16    1.03
   7  12   0   -0.15    1.00
   7  12   0    0.09    0.73
   7  12   0    0.00    0.76
  -7  12   0    0.17    0.47
   7  12   0   -0.94    1.01
   7  12   0   -0.38    0.64
   8 -12   0    0.00    0.80
   8 -12   0    4.32    1.75
   8 -12   0    0.58    1.73
  -8 -12   0    0.32    0.65
   8 -12   0    5.66    1.95
   8 -12   0    0.94    0.81
   8 -12   0    1.73    1.74
   8 -12   0    0.54    0.81
   8 -12   0    0.26    1.05
   8 -12   0    0.07    0.39
   8 -12   0    0.62    0.89
  -8 -12   0   -0.09    0.54
  -8 -12   0   -0.19    0.63
  -8  12   0   -0.31    0.49
   8  12   0   -0.91    0.97
   8  12   0    0.18    0.73
   8  12   0    1.86    1.02
   8  12   0   -0.22    0.41
   8  12   0    2.79    1.33
   9 -12   0    3.65    1.40
   9 -12   0    3.50    2.58
   9 -12   0    6.89    1.55
   9 -12   0    3.67    2.77
   9 -12   0    4.89    2.52
  -9 -12   0    5.16    1.40
  -9 -12   0    5.43    1.28
   9 -12   0    4.64    2.04
   9  12   0    3.53    1.40
   9  12   0    5.21    1.53
   9  12   0    4.64    1.35
  -9  12   0    5.41    1.13
  10 -12   0    7.60    1.81
 -10 -12   0   11.17    2.10
  10 -12   0   12.64    2.37
 -10 -12   0    9.52    1.76
  10  12   0   11.07    2.09
 -10  12   0    9.09    1.58
  10  12   0   10.14    2.05
 -11 -12   0   16.84    2.46
  11 -12   0   11.66    2.40
 -11 -12   0    9.42    2.19
 -11  12   0   15.07    2.08
  11  12   0    8.63    2.12
  11  12   0   16.66    2.71
   0 -13   0    0.11    0.34
   0 -13   0    1.27    0.25
   0 -13   0    0.57    0.18
   0 -13   0    0.77    0.46
   0  13   0    0.61    0.27
  -1 -13   0    0.40    0.40
  -1 -13   0    0.99    0.38
   1 -13   0    2.86    0.52
  -1 -13   0    2.46    0.49
  -1 -13   0    2.49    0.80
  -1 -13   0    0.79    0.27
  -1 -13   0    0.76    0.64
   1 -13   0    2.94    0.41
  -1 -13   0    3.53    0.62
  -1  13   0    2.14    0.30
   1  13   0    1.47    0.35
   1  13   0    2.33    0.49
   1  13   0    4.10    0.48
  -1  13   0    1.76    0.40
  -2 -13   0   36.02    2.18
  -2 -13   0   29.70    2.62
  -2 -13   0   35.53    1.96
   2 -13   0   33.64    1.74
  -2 -13   0   34.28    2.44
  -2 -13   0   37.06    3.12
   2 -13   0   35.35    2.15
  -2 -13   0   36.23    3.31
   2 -13   0   35.38    2.33
  -2 -13   0   31.27    2.82
  -2  13   0   32.78    2.07
   2  13   0   34.80    1.90
  -2  13   0   35.97    1.67
  -2  13   0   35.92    1.75
   2  13   0   36.61    2.05
   2  13   0   31.62    2.92
   2  13   0   32.65    2.05
   2  13   0   33.62    2.05
   2  13   0   36.47    2.71
  -3 -13   0    5.90    1.13
  -3 -13   0    1.99    0.71
  -3 -13   0    1.12    0.66
   3 -13   0    0.45    0.22
   3 -13   0    3.91    0.78
   3 -13   0    1.35    0.54
  -3 -13   0    0.67    0.69
   3 -13   0    1.29    0.49
  -3 -13   0    1.03    0.44
  -3 -13   0    1.33    0.41
  -3 -13   0    2.05    1.12
  -3 -13   0    8.12    1.98
   3  13   0    5.50    1.31
   3  13   0    1.37    0.44
   3  13   0    2.24    0.58
   3  13   0    0.85    0.55
   3  13   0    2.52    1.21
   3  13   0    0.66    0.19
   3  13   0    0.76    0.21
   3  13   0    3.41    0.64
  -4 -13   0    4.53    0.89
  -4 -13   0    4.53    0.78
   4 -13   0    4.61    0.61
   4 -13   0    4.12    0.93
   4 -13   0    4.28    0.28
  -4 -13   0    4.78    1.23
   4 -13   0    4.52    0.40
  -4 -13   0    7.32    2.19
   4 -13   0    5.01    0.60
  -4 -13   0    3.83    1.26
   4 -13   0    4.86    0.97
   4 -13   0    4.01    1.18
  -4 -13   0    4.80    0.98
  -4 -13   0    4.67    1.41
  -4 -13   0    4.19    1.17
  -4 -13   0    5.27    1.49
   4 -13   0    4.76    0.69
  -4 -13   0    5.79    1.79
   4 -13   0    4.38    1.08
   4 -13   0    5.78    0.77
   4 -13   0    3.88    0.27
   4  13   0    4.52    0.92
   4  13   0    2.06    1.03
  -4  13   0    4.68    0.97
   4  13   0    4.61    1.19
   4  13   0    3.91    0.44
   4  13   0    3.35    0.74
   4  13   0    4.17    0.46
  -4  13   0    4.17    0.61
  -4  13   0    5.54    0.65
   4  13   0    4.36    0.78
  -4  13   0    3.99    0.87
   4  13   0    5.85    1.10
   4  13   0    4.08    0.81
   4  13   0    3.00    1.67
   4  13   0    5.64    1.54
  -5 -13   0    0.59    0.84
   5 -13   0    0.70    0.85
  -5 -13   0    2.76    1.24
   5 -13   0    1.31    0.69
  -5 -13   0    3.95    1.42
   5 -13   0    0.44    0.48
   5 -13   0    0.32    0.36
   5 -13   0    0.06    0.46
  -5 -13   0    1.58    0.59
  -5 -13   0    0.56    0.60
   5 -13   0    0.97    0.53
  -5 -13   0    2.93    1.70
   5 -13   0    0.71    0.36
  -5 -13   0    0.62    0.48
   5 -13   0    2.49    0.69
   5 -13   0    2.94    1.28
   5 -13   0    0.42    0.23
  -5 -13   0    0.09    0.33
   5 -13   0    1.87    0.51
  -5  13   0    1.48    0.45
   5  13   0    1.14    0.54
   5  13   0    3.09    1.38
   5  13   0    2.17    0.84
  -5  13   0    0.63    0.63
   5  13   0    0.42    0.51
   5  13   0    2.67    0.82
   5  13   0   -0.13    0.72
   5  13   0    1.72    0.61
   5  13   0    0.68    0.90
   5  13   0    1.92    0.74
   5  13   0    1.37    1.34
  -6 -13   0    8.14    2.81
  -6 -13   0   11.41    1.50
  -6 -13   0   12.76    2.27
  -6 -13   0   10.54    2.70
  -6 -13   0   14.33    2.16
   6 -13   0   12.10    1.91
  -6 -13   0   12.76    1.73
   6 -13   0   11.93    1.53
   6 -13   0   10.40    2.74
   6 -13   0    9.86    1.52
   6 -13   0   10.96    2.64
   6 -13   0   11.40    1.87
   6 -13   0   10.51    1.40
   6 -13   0   10.95    1.25
   6 -13   0   12.12    1.77
  -6 -13   0   14.41    3.09
   6 -13   0   10.44    1.88
   6 -13   0   12.96    1.82
   6  13   0   11.63    1.59
   6  13   0   10.07    2.39
  -6  13   0   13.16    1.35
   6  13   0   11.20    3.39
   6  13   0   12.21    2.05
   6  13   0   12.26    1.60
   6  13   0   12.06    1.94
   6  13   0   14.79    2.12
   6  13   0   10.39    2.55
   6  13   0   12.90    2.85
   6  13   0   12.90    1.75
  -7 -13   0    2.47    1.62
   7 -13   0    1.80    1.21
  -7 -13   0    2.97    1.08
   7 -13   0    2.60    1.01
   7 -13   0    3.30    1.40
   7 -13   0    1.91    0.85
   7 -13   0    3.00    1.39
   7 -13   0    1.94    1.49
  -7 -13   0    1.18    1.92
  -7 -13   0   -0.25    0.63
   7 -13   0    2.50    0.69
  -7 -13   0    1.61    0.79
  -7 -13   0    2.91    1.73
   7 -13   0    1.61    0.80
   7 -13   0    3.10    1.93
  -7 -13   0    4.38    1.92
   7 -13   0    2.00    1.01
  -7 -13   0    1.18    0.71
   7  13   0    1.81    0.83
   7  13   0    2.95    2.70
   7  13   0    1.78    1.38
   7  13   0    2.74    1.21
   7  13   0    2.72    1.74
  -7  13   0    1.25    0.56
   7  13   0    2.98    1.23
   7  13   0    3.36    0.92
   7  13   0    2.02    0.90
   7  13   0    0.88    1.30
   8 -13   0    0.00    1.38
   8 -13   0   -0.47    0.33
   8 -13   0    0.46    1.26
  -8 -13   0    0.72    0.67
   8 -13   0    1.48    1.74
   8 -13   0    0.12    0.72
  -8 -13   0    0.41    0.67
   8 -13   0    1.40    1.38
   8 -13   0    0.85    0.71
   8 -13   0    0.55    1.20
   8 -13   0   -0.35    0.64
   8 -13   0    2.00    1.13
   8  13   0    0.27    1.04
   8  13   0    0.36    0.96
   8  13   0    0.92    0.64
   8  13   0   -0.59    0.66
   8  13   0   -0.51    0.63
  -8  13   0    0.30    0.53
   9 -13   0    0.06    0.80
   9 -13   0    1.08    2.07
  -9 -13   0   -0.46    0.69
   9 -13   0    0.56    2.03
   9 -13   0    1.23    0.90
   9 -13   0    0.72    1.33
   9 -13   0   -0.24    1.48
  -9 -13   0   -0.08    0.65
   9  13   0    2.27    1.19
   9  13   0    1.62    1.09
  -9  13   0    0.00    0.57
   9  13   0    2.00    0.97
  10 -13   0    1.37    1.04
 -10 -13   0    1.53    0.79
  10 -13   0    2.60    1.17
  10 -13   0    2.20    2.24
 -10  13   0    1.02    0.68
  10  13   0   -0.24    0.46
  10  13   0    2.25    1.30
 -11 -13   0    1.60    1.05
 -11 -13   0    0.17    0.98
  11 -13   0    1.75    1.16
 -11  13   0    1.58    0.86
  11  13   0    1.10    1.08
  11  13   0    0.90    1.02
   0 -14   0   52.96    3.46
   0 -14   0   62.92    3.01
   0 -14   0   60.89    2.83
   0 -14   0   52.46    3.55
   0 -14   0   60.93    2.84
   0  14   0   59.90    2.84
   0  14   0   61.53    3.01
   0  14   0   56.71    2.87
  -1 -14   0  130.48    5.53
   1 -14   0  113.43    5.53
  -1 -14   0  117.05    5.32
  -1 -14   0  117.86    5.66
  -1 -14   0   98.31    5.13
   1 -14   0  120.56    5.15
  -1 -14   0  109.73    6.59
  -1 -14   0  106.20    5.89
  -1 -14   0  114.89    5.70
  -1 -14   0  110.89    6.49
  -1 -14   0  101.88    5.18
  -1  14   0  121.14    5.13
   1  14   0  112.51    5.28
  -1  14   0  112.69    5.19
   1  14   0  116.97    5.35
  -1  14   0  117.48    5.41
   1  14   0  109.56    5.50
  -2 -14   0   31.68    2.29
  -2 -14   0   29.19    1.98
  -2 -14   0   32.22    2.33
   2 -14   0   30.22    1.56
   2 -14   0   27.49    1.94
  -2 -14   0   29.89    1.78
  -2 -14   0   25.80    2.44
  -2 -14   0   32.66    3.13
   2 -14   0   30.72    2.18
  -2 -14   0   33.85    3.00
  -2 -14   0   32.09    2.26
  -2 -14   0   29.77    2.74
   2  14   0   30.89    1.89
  -2  14   0   31.29    1.49
   2  14   0   30.31    1.85
   2  14   0   29.90    1.69
   2  14   0   29.33    2.67
  -2  14   0   31.30    1.94
   2  14   0   32.92    2.49
   2  14   0   28.64    1.89
  -2  14   0   30.54    1.56
  -3 -14   0   26.57    2.69
  -3 -14   0   30.95    2.38
   3 -14   0   29.71    2.13
   3 -14   0   34.66    1.74
  -3 -14   0   30.70    3.00
  -3 -14   0   32.03    2.15
   3 -14   0   32.71    1.69
   3 -14   0   34.65    1.70
  -3 -14   0   31.99    2.72
   3 -14   0   28.25    1.82
   3 -14   0   30.24    2.23
   3 -14   0   29.68    2.13
  -3 -14   0   32.40    2.63
  -3 -14   0   34.62    3.54
  -3 -14   0   30.99    1.95
  -3  14   0   32.73    1.72
   3  14   0   29.28    2.04
  -3  14   0   34.90    2.20
   3  14   0   32.58    3.48
   3  14   0   33.33    2.13
   3  14   0   33.05    2.91
   3  14   0   33.41    1.97
   3  14   0   29.94    1.93
  -4 -14   0  112.09    8.36
   4 -14   0  105.74    5.95
  -4 -14   0  111.50    6.43
  -4 -14   0  120.03    6.17
   4 -14   0  116.41    5.25
  -4 -14   0  102.48    7.01
  -4 -14   0  118.87    7.23
  -4 -14   0  110.23    5.91
  -4 -14   0  116.68    6.85
   4 -14   0  120.21    5.51
   4 -14   0  106.11    5.35
  -4 -14   0  135.51    8.29
  -4 -14   0  113.61    5.68
   4 -14   0  108.40    6.00
   4 -14   0  103.09    6.21
   4 -14   0  109.26    6.71
  -4 -14   0  110.51    7.00
   4 -14   0  121.22    5.48
   4 -14   0  116.42    5.13
   4  14   0  113.04    6.26
  -4  14   0  109.02    5.93
   4  14   0  109.77    5.86
  -4  14   0  118.11    5.33
  -4  14   0  116.67    5.39
   4  14   0  112.80    5.68
   4  14   0   98.34    7.99
   4  14   0  118.77    7.27
   4  14   0  108.01    5.79
   4  14   0  103.85    6.66
  -4  14   0  124.78    6.16
   4  14   0  112.91    5.73
   5 -14   0   41.63    2.08
   5 -14   0   36.62    2.19
  -5 -14   0   36.93    2.48
   5 -14   0   42.21    2.97
  -5 -14   0   40.22    3.62
  -5 -14   0   33.41    3.71
   5 -14   0   39.60    2.28
  -5 -14   0   40.49    3.37
  -5 -14   0   35.06    2.65
   5 -14   0   38.23    2.83
   5 -14   0   36.36    3.82
   5 -14   0   40.29    2.50
   5 -14   0   43.13    2.51
  -5 -14   0   41.56    4.35
   5 -14   0   41.46    2.56
   5 -14   0   36.06    3.55
   5 -14   0   38.01    2.54
  -5 -14   0   36.28    5.56
  -5 -14   0   31.64    4.31
   5  14   0   41.48    3.91
  -5  14   0   41.20    2.25
   5  14   0   35.45    2.58
   5  14   0   43.49    4.11
   5  14   0   39.40    2.65
   5  14   0   41.28    2.29
   5  14   0   40.34    2.47
   5  14   0   46.30    3.19
   5  14   0   36.38    2.56
   5  14   0   42.18    3.02
  -5  14   0   38.10    2.26
   5  14   0   31.97    3.28
   5  14   0   44.48    6.22
   6 -14   0    9.23    1.15
  -6 -14   0    9.73    2.55
  -6 -14   0    9.14    1.53
   6 -14   0   13.02    1.68
   6 -14   0   11.08    1.44
   6 -14   0   12.36    1.90
   6 -14   0   10.55    1.69
   6 -14   0   10.39    2.74
   6 -14   0   11.20    1.77
   6 -14   0   10.12    1.34
   6 -14   0   11.07    2.64
  -6 -14   0   11.61    2.21
  -6 -14   0    9.28    1.37
  -6 -14   0   10.34    1.94
  -6 -14   0    7.14    2.79
  -6 -14   0   11.57    2.77
   6 -14   0   10.48    1.83
   6 -14   0    9.65    1.65
  -6  14   0   11.38    1.25
   6  14   0    9.79    2.50
   6  14   0    9.37    1.57
   6  14   0   11.46    1.95
   6  14   0    8.89    2.16
   6  14   0    8.40    2.94
   6  14   0   13.86    2.99
   6  14   0    9.61    1.51
   6  14   0   12.96    1.70
   6  14   0    8.79    1.44
   7 -14   0    0.34    1.18
  -7 -14   0    2.00    2.23
   7 -14   0    0.45    0.43
  -7 -14   0    1.27    1.28
   7 -14   0    0.45    0.62
   7 -14   0    0.41    0.77
  -7 -14   0    0.03    0.54
   7 -14   0   -0.01    0.66
  -7 -14   0    1.40    1.37
  -7 -14   0   -0.11    0.51
   7 -14   0   -0.16    1.21
   7 -14   0    1.26    1.09
   7 -14   0    0.68    0.68
  -7 -14   0    0.62    0.73
   7 -14   0    1.28    1.11
  -7 -14   0    0.29    1.15
   7 -14   0    0.99    0.76
  -7 -14   0    1.35    0.97
   7  14   0    0.94    0.76
  -7  14   0    0.20    0.46
   7  14   0    0.79    1.18
   7  14   0    1.57    1.53
   7  14   0    0.08    1.18
   7  14   0    0.61    0.88
   7  14   0    1.04    0.74
   7  14   0    0.27    0.81
   7  14   0    0.76    0.52
   8 -14   0    4.19    1.91
   8 -14   0    3.03    2.30
   8 -14   0    1.25    1.10
   8 -14   0    6.25    2.07
  -8 -14   0   -0.26    0.62
   8 -14   0    1.52    1.38
   8 -14   0    2.63    1.02
   8 -14   0    1.39    0.81
   8 -14   0    0.96    0.99
  -8 -14   0    1.28    0.79
   8 -14   0    9.62    3.21
   8  14   0    2.51    1.49
   8  14   0    2.74    1.08
   8  14   0    4.31    1.26
   8  14   0    1.85    1.20
  -8  14   0    1.30    0.64
   8  14   0    1.62    0.82
   9 -14   0    4.56    1.51
   9 -14   0    1.84    1.84
  -9 -14   0    4.13    1.15
   9 -14   0    4.91    2.81
   9 -14   0    5.32    3.13
  -9 -14   0    1.53    0.97
   9 -14   0    3.75    1.29
   9  14   0    3.80    1.45
   9  14   0    3.00    1.29
  -9  14   0    4.94    1.08
   9  14   0    3.89    1.28
  10 -14   0   10.06    2.00
  10 -14   0    4.17    1.54
  10 -14   0    6.45    2.66
 -10 -14   0    4.80    1.54
 -10 -14   0    9.20    1.76
  10  14   0    2.85    1.38
  10  14   0    6.66    1.75
 -10  14   0    4.84    1.17
  11 -14   0   10.49    2.21
 -11 -14   0    9.07    2.15
 -11 -14   0    7.78    1.70
  11  14   0    6.98    1.88
 -11  14   0    8.92    1.64
  11  14   0    6.73    1.92
   0 -15   0    0.32    0.21
   0 -15   0    0.02    0.15
   0 -15   0   -0.02    0.35
   0 -15   0   -0.13    0.29
   0 -15   0    0.10    0.22
   0  15   0    0.39    0.22
   0  15   0    0.10    0.21
   0  15   0    0.15    0.16
   1 -15   0    1.20    0.40
  -1 -15   0    1.20    0.26
  -1 -15   0    0.79    0.67
  -1 -15   0    0.72    0.49
  -1 -15   0    1.12    0.27
  -1 -15   0    1.40    0.48
  -1 -15   0    1.55    0.73
  -1 -15   0    0.69    0.38
   1 -15   0    0.95    0.22
  -1 -15   0    1.06    0.31
  -1 -15   0    1.42    0.44
   1  15   0    1.63    0.33
  -1  15   0    1.58    0.38
  -1  15   0    1.54    0.24
  -1  15   0    1.31    0.27
   1  15   0    1.36    0.34
   1  15   0    0.77    0.35
  -2 -15   0   20.31    2.92
  -2 -15   0   20.66    1.78
  -2 -15   0   20.22    2.09
  -2 -15   0   22.74    1.47
  -2 -15   0   20.32    1.37
  -2 -15   0   22.39    1.89
  -2 -15   0   19.09    2.52
   2 -15   0   21.18    1.78
  -2 -15   0   22.35    2.46
   2 -15   0   21.88    1.18
  -2 -15   0   22.97    1.65
  -2 -15   0   20.70    1.81
   2 -15   0   21.24    1.59
  -2  15   0   21.51    1.09
  -2  15   0   20.48    1.15
   2  15   0   21.29    1.25
   2  15   0   23.66    1.49
   2  15   0   20.79    1.52
   2  15   0   18.26    1.94
   2  15   0   22.22    1.93
   2  15   0   20.64    1.39
  -2  15   0   20.27    1.49
   3 -15   0    3.13    0.70
  -3 -15   0    0.27    0.67
  -3 -15   0    8.21    1.43
   3 -15   0    2.55    0.38
   3 -15   0    0.88    0.41
  -3 -15   0    1.73    1.13
   3 -15   0    0.57    0.22
  -3 -15   0    7.02    1.29
  -3 -15   0    1.90    0.87
  -3 -15   0    1.15    0.42
  -3 -15   0    0.56    0.39
  -3 -15   0    1.83    0.72
   3 -15   0    1.43    0.60
   3 -15   0    1.85    0.39
   3 -15   0    0.69    0.27
   3  15   0    2.67    0.99
   3  15   0    2.73    0.57
   3  15   0    1.29    0.94
  -3  15   0    3.39    0.73
   3  15   0    1.38    0.51
  -4 -15   0    8.95    1.89
  -4 -15   0    4.15    0.91
   4 -15   0    4.85    0.70
  -4 -15   0    6.50    1.51
  -4 -15   0    7.38    2.32
   4 -15   0    5.19    0.65
   4 -15   0    4.76    0.41
  -4 -15   0    5.33    0.86
   4 -15   0    3.05    0.84
   4 -15   0    6.95    1.25
   4 -15   0    4.95    0.36
   4 -15   0    6.20    0.78
  -4 -15   0    3.67    1.56
   4 -15   0    3.81    1.17
  -4 -15   0    5.08    1.40
  -4 -15   0    4.38    1.42
   4 -15   0    5.73    1.09
   4  15   0    4.53    0.74
   4  15   0    6.01    1.07
  -4  15   0    4.70    0.58
   4  15   0    6.07    0.89
   4  15   0    5.09    0.86
   4  15   0    7.26    1.71
  -4  15   0    6.77    0.74
   4  15   0    5.20    0.90
   4  15   0    6.53    2.06
   4  15   0    6.20    1.37
   4  15   0    4.49    0.91
   5 -15   0   26.29    1.36
   5 -15   0   27.95    1.82
  -5 -15   0   28.23    4.15
   5 -15   0   23.38    3.42
   5 -15   0   26.69    1.84
  -5 -15   0   25.34    1.92
   5 -15   0   24.22    3.21
  -5 -15   0   22.55    3.57
   5 -15   0   23.02    1.77
  -5 -15   0   30.14    4.98
   5 -15   0   24.68    1.42
   5 -15   0   24.57    1.63
  -5 -15   0   27.07    3.45
   5 -15   0   23.16    1.83
   5 -15   0   24.80    2.23
  -5 -15   0   31.55    4.10
   5 -15   0   26.78    2.65
   5  15   0   22.85    2.51
  -5  15   0   29.27    1.66
   5  15   0   26.04    1.98
  -5  15   0   25.01    1.64
   5  15   0   24.68    2.03
   5  15   0   26.10    4.71
   5  15   0   26.52    2.31
   5  15   0   23.60    1.98
   5  15   0   25.60    3.62
   5  15   0   20.92    3.13
   6 -15   0   26.57    4.43
  -6 -15   0   36.35    4.96
   6 -15   0   30.77    2.26
   6 -15   0   27.85    2.37
   6 -15   0   25.88    4.00
  -6 -15   0   34.88    5.97
  -6 -15   0   32.46    3.03
  -6 -15   0   36.58    5.05
   6 -15   0   31.67    2.21
   6 -15   0   30.16    2.71
  -6 -15   0   29.82    2.52
  -6 -15   0   29.47    4.60
  -6 -15   0   30.00    2.28
   6 -15   0   31.25    2.73
   6 -15   0   27.18    2.48
  -6 -15   0   28.17    3.72
   6 -15   0   33.51    2.07
   6 -15   0   32.36    2.80
   6 -15   0   31.00    2.63
   6  15   0   31.33    3.88
   6  15   0   28.32    2.36
   6  15   0   28.03    4.13
   6  15   0   33.74    2.37
   6  15   0   36.97    6.15
   6  15   0   33.94    2.95
   6  15   0   31.72    2.47
  -6  15   0   32.30    2.03
   6  15   0   39.21    4.97
   6  15   0   31.07    2.43
  -6  15   0   33.33    2.19
   7 -15   0    2.37    1.80
  -7 -15   0    3.70    0.99
   7 -15   0    3.50    0.79
   7 -15   0    5.01    1.16
  -7 -15   0    3.05    1.03
   7 -15   0    1.97    1.07
  -7 -15   0    4.02    2.22
  -7 -15   0    2.58    1.65
  -7 -15   0    3.47    1.23
   7 -15   0    2.71    0.95
   7 -15   0    2.25    1.15
   7 -15   0    2.53    0.98
   7 -15   0    2.63    1.78
   7 -15   0    2.86    1.13
   7 -15   0    3.22    1.30
  -7 -15   0    4.71    1.48
   7  15   0    3.02    0.97
   7  15   0    5.23    1.25
   7  15   0    3.30    1.87
   7  15   0    3.13    0.98
   7  15   0    3.61    1.70
  -7  15   0    2.63    0.69
   7  15   0    2.35    1.58
   7  15   0    2.70    1.20
   8 -15   0   14.84    3.11
   8 -15   0   17.90    3.50
   8 -15   0   17.31    2.69
   8 -15   0   23.72    2.90
  -8 -15   0   20.05    2.31
   8 -15   0   17.39    4.23
   8 -15   0   20.00    2.41
  -8 -15   0   19.88    2.65
   8 -15   0   20.88    4.92
   8 -15   0   17.68    2.96
   8 -15   0   22.13    3.87
   8  15   0   19.99    2.47
   8  15   0   23.10    2.77
   8  15   0   20.98    2.51
  -8  15   0   20.29    1.73
   9 -15   0    5.52    3.27
   9 -15   0    5.95    1.65
   9 -15   0    5.19    1.40
  -9 -15   0    5.94    1.36
   9 -15   0    4.16    2.64
   9 -15   0    0.28    1.25
  -9 -15   0    6.35    1.64
   9 -15   0    1.97    1.84
  -9  15   0    3.87    0.98
   9  15   0    5.45    1.68
   9  15   0    7.37    1.61
   9  15   0    4.37    1.46
 -10 -15   0    8.50    1.99
 -10 -15   0    9.41    1.80
  10 -15   0    8.28    2.94
  10 -15   0   12.21    2.37
  10 -15   0    9.79    1.97
  10  15   0    7.60    1.87
  10  15   0    5.67    1.68
 -10  15   0    7.57    1.40
 -11 -15   0    4.42    1.46
  11 -15   0    5.63    1.63
 -11 -15   0    6.06    1.81
  11  15   0    7.12    1.99
  11  15   0    9.44    2.12
 -11  15   0    6.10    1.39
   0 -16   0    9.87    0.75
   0 -16   0    8.86    0.66
   0 -16   0    6.91    1.33
   0 -16   0    8.59    1.35
   0 -16   0    9.16    0.86
   0  16   0    9.29    0.68
   0  16   0    9.88    0.72
   0  16   0    9.28    0.81
   1 -16   0   86.79    3.98
  -1 -16   0   88.79    4.55
  -1 -16   0   76.17    4.74
   1 -16   0   85.23    4.40
   1 -16   0   87.65    3.82
  -1 -16   0   74.54    3.99
  -1 -16   0   86.59    4.59
  -1 -16   0   85.55    5.49
   1 -16   0   93.01    3.83
  -1 -16   0   76.63    4.03
  -1 -16   0   97.04    4.40
  -1 -16   0   81.06    5.37
  -1 -16   0   84.17    4.13
   1  16   0   91.87    4.21
  -1  16   0   86.35    4.04
  -1  16   0   89.49    3.95
   1  16   0   91.29    4.44
  -1  16   0   87.30    4.23
   1  16   0   84.30    4.07
   2 -16   0   38.15    2.44
  -2 -16   0   42.59    2.85
   2 -16   0   40.17    2.72
  -2 -16   0   38.27    3.57
  -2 -16   0   39.05    3.51
  -2 -16   0   40.01    2.30
  -2 -16   0   36.19    2.44
  -2 -16   0   37.40    3.04
  -2 -16   0   36.07    2.59
  -2 -16   0   40.85    2.83
   2 -16   0   40.34    1.97
  -2 -16   0   40.89    2.23
  -2 -16   0   34.70    3.17
   2  16   0   40.00    1.99
  -2  16   0   40.31    1.89
   2  16   0   38.69    2.66
   2  16   0   36.77    2.36
  -2  16   0   39.40    2.35
   2  16   0   37.02    2.53
  -2  16   0   40.88    1.96
   2  16   0   41.97    2.31
   2  16   0   37.70    2.08
  -3 -16   0   18.47    1.98
   3 -16   0   21.27    1.31
  -3 -16   0   20.93    3.30
   3 -16   0   17.59    1.94
  -3 -16   0   18.85    1.63
  -3 -16   0   23.99    2.01
   3 -16   0   20.52    1.18
  -3 -16   0   20.75    2.70
   3 -16   0   19.88    1.17
  -3 -16   0   20.78    1.47
  -3 -16   0   19.78    2.76
   3 -16   0   19.45    1.68
   3 -16   0   20.94    1.21
   3 -16   0   17.63    1.58
  -3 -16   0   20.15    2.14
   3  16   0   19.88    1.41
  -3  16   0   19.96    1.18
  -3  16   0   20.16    1.63
   3  16   0   19.40    3.06
   3  16   0   20.02    1.58
  -3  16   0   21.04    1.10
   3  16   0   22.82    2.36
  -4 -16   0   16.84    1.35
  -4 -16   0   16.09    2.68
   4 -16   0   14.01    2.10
  -4 -16   0   15.44    2.45
  -4 -16   0   13.59    2.40
  -4 -16   0   13.32    1.66
   4 -16   0   15.90    1.80
  -4 -16   0   12.04    2.61
  -4 -16   0   16.96    2.53
  -4 -16   0   18.73    3.70
   4 -16   0   17.45    1.19
   4 -16   0   14.88    1.61
   4 -16   0   16.66    1.19
   4 -16   0   15.44    1.08
   4 -16   0   15.03    1.85
   4  16   0   15.44    2.55
   4  16   0   16.98    1.49
   4  16   0   14.96    1.68
   4  16   0   16.30    1.35
   4  16   0   14.06    1.35
  -4  16   0   16.08    1.08
   4  16   0   16.05    3.33
   4  16   0   16.56    1.73
   5 -16   0    2.45    0.87
  -5 -16   0    2.09    1.38
  -5 -16   0    1.80    0.75
  -5 -16   0    2.71    1.43
   5 -16   0    1.75    0.96
   5 -16   0    2.64    0.55
  -5 -16   0    2.43    1.76
   5 -16   0    2.37    0.65
   5 -16   0    1.64    0.80
   5 -16   0    1.49    0.47
   5 -16   0    2.08    1.18
  -5 -16   0    3.99    1.56
   5 -16   0    2.44    0.65
   5 -16   0    2.12    0.52
  -5 -16   0    1.07    0.57
  -5 -16   0    1.34    0.91
   5  16   0    2.54    0.73
   5  16   0    1.53    0.98
   5  16   0    2.91    0.85
   5  16   0    2.71    0.94
   5  16   0    1.97    1.63
   5  16   0    1.82    0.64
  -5  16   0    2.75    0.57
  -5  16   0    3.46    0.57
   5  16   0    2.72    1.31
  -6 -16   0    1.92    1.41
   6 -16   0    0.85    0.65
  -6 -16   0    1.33    0.72
   6 -16   0    1.73    0.54
   6 -16   0    1.76    0.53
  -6 -16   0    2.91    0.82
   6 -16   0    1.51    1.40
  -6 -16   0    5.67    2.05
   6 -16   0    2.84    0.86
   6 -16   0    3.47    1.55
  -6 -16   0    4.68    2.24
   6 -16   0    2.73    0.81
   6 -16   0    1.24    0.79
  -6 -16   0    4.29    1.68
   6 -16   0    3.68    1.09
   6 -16   0    2.03    0.90
   6 -16   0    4.86    1.08
  -6 -16   0    2.81    1.17
  -6 -16   0    1.58    0.99
   6  16   0    2.79    0.86
   6  16   0    1.52    0.77
   6  16   0    3.44    1.09
   6  16   0    1.45    1.18
   6  16   0    2.85    1.25
   6  16   0    2.03    0.75
   6  16   0    3.94    2.10
  -6  16   0    2.29    0.56
   6  16   0    2.27    1.53
  -7 -16   0    1.60    0.88
   7 -16   0    1.37    0.99
   7 -16   0    2.58    0.88
   7 -16   0    1.16    0.78
   7 -16   0    1.22    0.71
   7 -16   0    6.52    2.44
   7 -16   0    1.40    1.55
  -7 -16   0    0.52    0.63
  -7 -16   0    1.93    2.51
   7 -16   0    2.46    1.14
   7 -16   0    0.20    0.73
   7 -16   0    2.05    1.18
   7  16   0    1.24    0.78
   7  16   0    0.52    1.07
  -7  16   0    0.48    0.48
   7  16   0    1.25    0.77
   7  16   0    0.64    0.65
   7  16   0    1.11    1.33
   8 -16   0    2.55    1.55
   8 -16   0    3.35    2.01
   8 -16   0   -0.28    1.11
   8 -16   0    1.39    0.98
   8 -16   0    3.30    1.68
   8 -16   0    1.63    1.17
   8 -16   0    1.60    1.97
  -8 -16   0    2.71    0.93
  -8 -16   0    3.72    1.18
   8 -16   0    3.72    1.32
   8 -16   0    3.72    1.14
   8  16   0    1.84    0.95
  -8  16   0    1.80    0.69
   8  16   0    2.98    1.19
   8  16   0    3.54    1.15
   9 -16   0    5.31    2.88
  -9 -16   0    0.61    0.79
   9 -16   0   -0.21    1.28
   9 -16   0    1.30    1.93
   9 -16   0    0.57    0.85
   9 -16   0    1.61    1.37
   9 -16   0    0.43    1.00
  -9 -16   0    1.30    1.00
   9  16   0    1.00    1.03
   9  16   0    2.56    1.12
   9  16   0    1.57    1.08
  -9  16   0    0.76    0.59
 -10 -16   0    3.41    1.47
  10 -16   0    3.49    1.37
 -10 -16   0    2.22    1.04
  10 -16   0    3.58    1.53
  10 -16   0    3.59    2.18
 -10  16   0    2.49    0.92
  10  16   0    2.37    1.28
  10  16   0    3.80    1.43
 -11 -16   0    0.63    0.68
  11 -16   0    1.20    1.19
 -11 -16   0   -0.59    0.87
  11  16   0    0.86    1.01
 -11  16   0    1.65    0.82
  11  16   0   -0.01    0.97
   0 -17   0    0.19    0.41
   0 -17   0   -0.25    0.20
   0 -17   0    0.25    0.19
   0 -17   0   -0.02    0.26
   0 -17   0    0.25    0.54
   0  17   0    0.09    0.22
   0  17   0   -0.05    0.16
   0  17   0    0.21    0.20
   1 -17   0    0.91    0.38
  -1 -17   0    0.64    0.49
   1 -17   0    0.53    0.17
  -1 -17   0    0.86    0.64
  -1 -17   0    0.63    0.43
   1 -17   0    0.58    0.18
  -1 -17   0    0.85    0.41
  -1 -17   0    0.91    0.67
   1 -17   0    0.33    0.17
  -1 -17   0    0.30    0.22
  -1 -17   0    0.57    0.37
   1 -17   0    0.26    0.32
   1 -17   0    0.19    0.21
  -1 -17   0    0.09    0.21
  -1 -17   0    0.21    0.21
   1  17   0    0.65    0.28
  -1  17   0    0.46    0.29
  -1  17   0    0.66    0.23
   1  17   0    0.54    0.22
  -1  17   0    0.73    0.19
   1  17   0    0.70    0.38
  -2 -17   0   20.05    1.43
  -2 -17   0   16.78    2.40
  -2 -17   0   19.53    1.84
  -2 -17   0   19.11    2.84
  -2 -17   0   20.81    2.96
  -2 -17   0   20.76    1.89
  -2 -17   0   19.61    2.11
  -2 -17   0   16.27    1.82
   2 -17   0   20.33    2.08
  -2 -17   0   20.33    1.63
   2 -17   0   21.74    1.62
  -2 -17   0   18.34    1.33
   2  17   0   19.04    1.40
   2  17   0   21.03    1.37
  -2  17   0   19.77    1.47
   2  17   0   21.04    1.01
  -2  17   0   20.24    1.11
  -2  17   0   19.84    1.04
   2  17   0   18.40    1.49
   3 -17   0    2.97    0.41
  -3 -17   0    3.67    1.03
  -3 -17   0    2.04    1.19
  -3 -17   0    3.36    1.23
   3 -17   0    3.08    0.45
  -3 -17   0    2.81    0.61
  -3 -17   0    2.66    0.90
  -3 -17   0    2.48    0.87
   3 -17   0    3.92    0.55
  -3 -17   0    1.96    0.67
   3 -17   0    1.77    0.72
   3 -17   0    1.96    0.62
   3 -17   0    2.85    0.75
   3 -17   0    2.86    0.42
  -3 -17   0    3.23    1.15
   3  17   0    2.91    0.58
  -3  17   0    3.18    0.35
  -3  17   0    2.96    0.72
  -3  17   0    3.43    0.43
   3  17   0    1.27    0.98
   3  17   0    3.24    0.75
  -4 -17   0   26.82    2.81
  -4 -17   0   24.94    2.02
   4 -17   0   22.43    1.44
   4 -17   0   25.08    1.56
  -4 -17   0   21.52    3.12
   4 -17   0   25.26    1.58
  -4 -17   0   34.78    5.23
   4 -17   0   26.00    2.09
  -4 -17   0   29.87    4.17
  -4 -17   0   21.12    2.85
   4 -17   0   23.66    2.06
  -4 -17   0   25.76    3.33
   4 -17   0   21.41    2.32
  -4 -17   0   24.36    1.77
   4 -17   0   24.28    2.51
   4  17   0   23.21    1.67
   4  17   0   24.88    1.60
   4  17   0   24.69    1.94
   4  17   0   20.45    3.67
   4  17   0   25.84    1.75
   4  17   0   22.14    1.75
  -4  17   0   24.79    1.45
   5 -17   0   62.65    3.46
   5 -17   0   60.78    3.43
  -5 -17   0   68.00    5.85
  -5 -17   0   69.43    4.83
   5 -17   0   57.38    3.27
   5 -17   0   54.71    4.97
  -5 -17   0   59.67    5.32
   5 -17   0   54.14    4.51
  -5 -17   0   67.46    6.76
  -5 -17   0   62.41    5.28
   5 -17   0   64.33    3.27
  -5 -17   0   61.39    5.00
   5 -17   0   65.45    3.32
  -5 -17   0   63.62    3.94
   5 -17   0   60.87    4.03
  -5 -17   0   64.79    3.66
   5 -17   0   63.92    4.06
   5  17   0   59.91    3.65
  -5  17   0   66.00    3.17
   5  17   0   59.75    3.58
   5  17   0   64.82    4.04
   5  17   0   54.54    6.06
  -5  17   0   59.39    3.19
   5  17   0   61.52    3.82
   5  17   0   56.92    4.41
  -6 -17   0   36.53    2.51
   6 -17   0   33.71    2.35
   6 -17   0   32.26    2.74
  -6 -17   0   41.96    5.45
   6 -17   0   31.54    2.83
   6 -17   0   31.39    2.69
  -6 -17   0   43.20    4.65
   6 -17   0   33.42    2.10
  -6 -17   0   31.74    3.16
   6 -17   0   32.66    2.47
   6 -17   0   30.58    2.15
   6 -17   0   35.72    2.55
   6 -17   0   33.61    4.96
  -6 -17   0   31.74    2.65
  -6 -17   0   34.87    4.90
   6 -17   0   31.14    2.73
  -6 -17   0   33.20    5.90
   6 -17   0   37.88    4.05
   6  17   0   29.78    4.01
   6  17   0   29.21    5.70
   6  17   0   33.10    2.48
   6  17   0   30.09    2.43
   6  17   0   33.98    2.64
  -6  17   0   32.69    2.04
   6  17   0   29.09    4.84
   7 -17   0   38.01    3.21
  -7 -17   0   38.43    3.18
  -7 -17   0   42.63    2.95
   7 -17   0   39.46    2.84
   7 -17   0   35.29    5.75
   7 -17   0   39.03    3.78
   7 -17   0   42.58    3.71
   7 -17   0   44.22    3.49
   7 -17   0   35.00    5.34
   7 -17   0   34.98    3.58
   7 -17   0   38.39    3.13
  -7  17   0   40.42    2.48
   7  17   0   35.74    4.89
   7  17   0   38.51    3.00
   7  17   0   41.03    3.13
   7  17   0   40.39    3.02
   8 -17   0   34.90    2.88
   8 -17   0   37.07    3.78
   8 -17   0   33.49    4.78
   8 -17   0   30.63    3.97
   8 -17   0   36.75    4.78
  -8 -17   0   41.55    3.33
   8 -17   0   34.45    5.92
   8 -17   0   33.34    4.67
   8 -17   0   38.09    3.49
   8 -17   0   42.30    6.99
  -8 -17   0   36.89    2.88
   8  17   0   37.45    3.12
  -8  17   0   34.78    2.42
   8  17   0   35.83    3.08
   8  17   0   34.31    3.04
   9 -17   0    8.85    3.03
   9 -17   0    5.49    2.07
  -9 -17   0    9.04    1.69
   9 -17   0   11.08    3.85
  -9 -17   0    7.42    1.75
   9 -17   0    7.83    3.44
   9 -17   0    8.22    1.96
   9 -17   0   10.32    1.88
   9  17   0   10.54    2.08
   9  17   0   11.64    2.15
  -9  17   0   10.07    1.39
   9  17   0    8.92    1.82
 -10 -17   0    5.76    1.53
  10 -17   0    4.84    1.50
  10 -17   0    3.83    2.18
 -10 -17   0    8.10    1.94
  10 -17   0    3.67    1.58
 -10  17   0    6.62    1.25
  10  17   0    5.20    1.63
  10  17   0    5.93    1.68
 -11 -17   0    5.00    1.49
  11 -17   0    3.58    1.44
  11  17   0    2.16    1.16
 -11  17   0    4.69    1.17
   0 -18   0    1.56    0.34
   0 -18   0    0.87    0.59
   0 -18   0    1.58    0.42
   0 -18   0    1.97    0.80
   0 -18   0    1.24    0.46
   0  18   0    1.81    0.44
   0  18   0    1.51    0.33
   0  18   0    1.76    0.35
  -1 -18   0   57.32    3.12
   1 -18   0   53.52    2.44
  -1 -18   0   47.38    3.88
  -1 -18   0   43.49    2.64
  -1 -18   0   50.80    3.37
  -1 -18   0   59.20    3.07
   1 -18   0   52.40    2.91
  -1 -18   0   50.36    3.11
   1 -18   0   48.65    2.44
   1 -18   0   46.40    2.80
   1 -18   0   44.62    3.00
   1 -18   0   54.70    2.43
  -1 -18   0   48.45    3.82
  -1 -18   0   50.79    2.61
  -1 -18   0   45.07    2.60
  -1  18   0   49.37    2.40
   1  18   0   50.55    2.88
   1  18   0   49.61    2.49
   1  18   0   53.42    2.69
  -1  18   0   50.18    2.67
  -1  18   0   49.89    2.51
  -2 -18   0    0.04    0.52
   2 -18   0    0.30    0.14
   2 -18   0   -0.06    0.42
  -2 -18   0    0.06    0.35
  -2 -18   0   -0.15    0.23
  -2 -18   0    0.79    0.72
  -2 -18   0    0.27    0.40
  -2 -18   0    0.12    0.58
  -2 -18   0   -0.19    0.20
  -2 -18   0    0.76    0.53
  -2 -18   0    0.90    0.67
   2 -18   0    0.06    0.13
  -2 -18   0   -0.32    0.38
   2 -18   0    0.05    0.34
   2  18   0    0.11    0.32
  -2  18   0    0.09    0.13
   2  18   0    0.23    0.31
   2  18   0    0.43    0.25
  -2  18   0   -0.21    0.28
  -2  18   0    0.32    0.18
  -3 -18   0    1.05    0.67
  -3 -18   0    0.09    0.29
  -3 -18   0    0.31    0.68
  -3 -18   0   -0.05    0.55
  -3 -18   0   -0.15    0.66
   3 -18   0    1.02    0.29
   3 -18   0    1.14    0.59
   3 -18   0    0.69    0.50
   3 -18   0    0.27    0.41
  -3 -18   0    0.00    0.38
   3 -18   0    0.29    0.23
  -3 -18   0    1.66    0.76
   3 -18   0    0.49    0.23
   3 -18   0    0.45    0.24
   3  18   0    0.52    0.42
  -3  18   0    0.16    0.15
   3  18   0    1.21    0.41
  -3  18   0    0.60    0.22
  -3  18   0    0.49    0.44
  -4 -18   0    1.11    0.89
  -4 -18   0    1.87    1.00
  -4 -18   0    1.60    0.89
   4 -18   0    0.90    0.41
  -4 -18   0    0.42    0.88
   4 -18   0    0.37    0.69
  -4 -18   0    0.84    0.47
  -4 -18   0    1.79    1.45
  -4 -18   0    0.93    0.60
   4 -18   0    1.79    0.73
   4 -18   0    0.37    0.47
   4 -18   0    0.90    0.37
   4 -18   0    0.67    0.29
   4 -18   0    0.09    0.49
  -4 -18   0    1.17    0.87
   4  18   0    0.51    0.44
   4  18   0    0.97    1.19
   4  18   0    1.78    0.65
  -4  18   0    1.02    0.27
   4  18   0    0.79    0.42
  -4  18   0    0.95    0.32
   5 -18   0    0.52    0.51
   5 -18   0    0.81    0.34
   5 -18   0    0.16    0.23
  -5 -18   0    0.99    1.45
   5 -18   0    0.66    0.86
   5 -18   0    0.56    0.62
   5 -18   0    2.90    1.17
  -5 -18   0    2.96    1.45
   5 -18   0    0.31    0.31
   5 -18   0    0.23    0.39
  -5 -18   0    1.35    1.08
  -5 -18   0   -0.22    0.89
  -5 -18   0   -0.51    0.46
  -5 -18   0    0.06    0.53
   5 -18   0    0.70    0.65
  -5 -18   0    0.60    0.85
  -5 -18   0    0.30    0.46
   5  18   0    0.87    0.51
   5  18   0    0.91    0.59
   5  18   0    0.74    0.56
  -5  18   0    0.64    0.33
  -5  18   0    0.09    0.16
   5  18   0    0.46    0.64
   5  18   0    0.29    1.31
  -6 -18   0    0.70    0.75
  -6 -18   0    4.24    1.80
   6 -18   0    3.05    1.07
  -6 -18   0    4.31    1.00
  -6 -18   0    1.61    1.95
   6 -18   0    2.15    0.88
  -6 -18   0    3.96    1.16
  -6 -18   0    4.85    1.97
   6 -18   0    2.61    0.85
   6 -18   0    3.30    0.82
  -6 -18   0    3.46    1.32
  -6 -18   0    3.06    1.63
   6 -18   0    4.99    1.27
   6 -18   0    2.56    0.59
   6 -18   0    5.95    1.05
   6 -18   0    3.71    1.03
   6 -18   0    2.28    1.44
   6 -18   0    2.97    1.67
   6  18   0    2.75    0.89
  -6  18   0    3.25    0.64
   6  18   0    3.48    1.38
   6  18   0    3.29    3.35
   6  18   0    2.54    0.87
   6  18   0    3.53    0.89
   7 -18   0    5.27    1.48
   7 -18   0    5.71    1.62
   7 -18   0    4.41    1.98
   7 -18   0    8.57    1.81
  -7 -18   0    5.65    1.33
   7 -18   0    5.67    1.60
   7 -18   0    6.71    1.25
   7 -18   0    7.83    2.78
   7 -18   0    5.19    1.33
   7 -18   0    2.70    0.97
  -7 -18   0    6.03    1.19
   7  18   0    4.03    1.12
  -7  18   0    5.14    0.87
   7  18   0    4.17    1.09
   7  18   0    4.38    1.13
   7  18   0    6.44    2.73
  -8 -18   0    0.43    0.71
   8 -18   0    0.51    0.70
  -8 -18   0    0.78    0.86
   8 -18   0    1.40    1.85
   8 -18   0    1.01    1.20
   8 -18   0    0.41    0.72
   8 -18   0   -0.40    0.97
   8 -18   0    1.49    0.93
   8 -18   0   -0.14    0.88
   8 -18   0    1.07    1.70
   8 -18   0   -0.69    0.97
   8  18   0    0.94    0.80
   8  18   0    0.84    0.81
  -8  18   0    0.02    0.45
   8  18   0    0.65    0.80
   9 -18   0    1.14    0.94
  -9 -18   0    1.11    0.90
   9 -18   0   -0.13    1.32
   9 -18   0    2.53    1.08
   9 -18   0    3.95    2.40
   9 -18   0    0.91    2.04
  -9 -18   0    0.70    0.77
   9 -18   0    0.14    1.07
  -9  18   0    0.40    0.57
   9  18   0   -0.12    0.75
   9  18   0    1.20    0.98
   9  18   0   -0.69    0.90
  10 -18   0    0.54    1.18
  10 -18   0    2.43    1.22
 -10 -18   0    0.62    0.97
 -10 -18   0    0.18    0.58
  10 -18   0    0.93    1.52
  10  18   0   -0.01    0.81
 -10  18   0    0.29    0.61
  10  18   0    0.92    0.91
   0 -19   0    0.31    0.39
   0 -19   0    0.31    0.53
   0 -19   0   -0.01    0.18
   0 -19   0    0.30    0.32
   0 -19   0    0.30    0.36
   0  19   0    0.29    0.20
   0  19   0    0.45    0.23
   0  19   0    0.25    0.24
   1 -19   0    2.18    0.37
  -1 -19   0    1.81    0.99
   1 -19   0    1.58    0.34
  -1 -19   0    2.82    0.87
  -1 -19   0    1.90    0.85
  -1 -19   0    1.21    0.56
   1 -19   0    1.78    0.32
  -1 -19   0    1.80    0.50
  -1 -19   0    2.08    0.49
   1 -19   0    1.95    0.53
  -1 -19   0    2.12    0.64
  -1 -19   0    1.81    0.42
   1 -19   0    1.20    0.58
   1 -19   0    2.05    0.55
   1  19   0    1.94    0.34
  -1  19   0    1.61    0.41
  -1  19   0    2.04    0.31
   1  19   0    3.05    0.53
  -1  19   0    1.29    0.31
   1  19   0    3.56    0.70
  -2 -19   0    4.58    1.36
   2 -19   0    5.18    0.45
  -2 -19   0    6.55    1.21
  -2 -19   0    5.32    0.80
  -2 -19   0    4.05    0.70
   2 -19   0    3.27    0.62
  -2 -19   0    5.63    1.64
  -2 -19   0    3.07    0.86
   2 -19   0    5.43    0.52
   2 -19   0    6.75    0.44
  -2 -19   0    3.47    1.13
  -2 -19   0    5.06    0.95
  -2 -19   0    6.29    1.19
  -2 -19   0    9.53    2.08
   2 -19   0    7.25    1.05
   2 -19   0    4.36    1.06
   2  19   0    5.87    0.86
  -2  19   0    4.98    0.80
   2  19   0    8.28    1.16
  -2  19   0    6.47    0.48
  -2  19   0    4.44    0.38
   2  19   0    8.43    0.72
  -3 -19   0   17.11    2.51
   3 -19   0   13.46    1.03
  -3 -19   0   11.29    2.49
   3 -19   0   15.24    1.00
  -3 -19   0   14.19    2.67
  -3 -19   0   17.98    2.43
  -3 -19   0   15.65    1.79
  -3 -19   0   13.92    1.21
  -3 -19   0   15.00    2.13
   3 -19   0   10.63    1.51
   3 -19   0   13.11    0.91
   3 -19   0   13.74    1.65
  -3 -19   0   14.40    2.50
   3 -19   0   15.64    1.95
   3 -19   0   14.79    0.94
  -3  19   0   14.86    0.81
  -3  19   0   14.83    0.88
   3  19   0   14.45    1.64
   3  19   0   13.73    1.05
  -3  19   0   15.70    1.39
   4 -19   0   35.44    2.86
  -4 -19   0   32.80    3.34
   4 -19   0   36.52    2.74
  -4 -19   0   44.59    3.97
   4 -19   0   31.63    3.13
   4 -19   0   35.47    2.13
   4 -19   0   37.70    2.04
  -4 -19   0   39.06    4.18
   4 -19   0   37.34    2.15
  -4 -19   0   38.30    2.77
  -4 -19   0   37.85    3.73
   4 -19   0   36.51    2.68
  -4 -19   0   41.15    2.48
  -4 -19   0   37.86    5.54
  -4 -19   0   41.33    3.67
   4  19   0   40.01    2.34
  -4  19   0   38.98    2.00
   4  19   0   36.17    2.63
   4  19   0   36.88    2.34
  -4  19   0   39.41    1.92
  -5 -19   0   61.40    4.05
   5 -19   0   59.51    4.58
  -5 -19   0   65.04    5.21
  -5 -19   0   57.58    7.79
   5 -19   0   61.52    3.19
   5 -19   0   65.27    4.22
   5 -19   0   63.30    3.43
  -5 -19   0   68.48    6.00
  -5 -19   0   61.81    4.86
   5 -19   0   65.15    3.49
  -5 -19   0   62.01    3.68
   5 -19   0   59.53    3.16
   5 -19   0   54.63    5.04
   5 -19   0   63.97    3.26
   5 -19   0   59.20    4.04
  -5 -19   0   57.77    5.23
   5 -19   0   68.89    3.19
  -5 -19   0   67.94    5.77
   5  19   0   62.93    3.72
   5  19   0   60.47    3.90
  -5  19   0   62.84    3.18
   5  19   0   61.32    3.60
   6 -19   0   35.72    2.87
   6 -19   0   37.76    2.62
  -6 -19   0   42.74    7.17
   6 -19   0   42.40    3.11
   6 -19   0   39.42    5.32
   6 -19   0   40.12    2.68
  -6 -19   0   40.27    5.54
   6 -19   0   39.24    3.05
   6 -19   0   41.26    3.25
  -6 -19   0   40.72    4.03
  -6 -19   0   45.87    2.91
  -6 -19   0   40.79    5.50
  -6 -19   0   36.84    5.25
   6 -19   0   35.64    3.12
  -6 -19   0   48.10    4.02
  -6 -19   0   40.33    3.18
   6 -19   0   39.87    2.42
   6 -19   0   40.56    4.27
   6  19   0   42.79    3.12
   6  19   0   38.59    2.80
  -6  19   0   41.45    2.33
   6  19   0   37.79    2.73
   7 -19   0   35.71    3.49
   7 -19   0   36.88    3.60
   7 -19   0   29.73    2.99
  -7 -19   0   32.26    2.86
   7 -19   0   30.11    3.14
   7 -19   0   31.24    4.94
   7 -19   0   32.20    3.05
   7 -19   0   28.75    5.20
   7 -19   0   32.45    2.50
   7 -19   0   28.07    2.60
  -7 -19   0   35.40    2.61
   7  19   0   30.05    3.12
   7  19   0   30.28    2.56
   7  19   0   30.41    2.59
  -7  19   0   29.99    2.02
   8 -19   0   37.49    4.88
  -8 -19   0   42.91    3.19
   8 -19   0   36.47    4.84
   8 -19   0   39.24    3.87
   8 -19   0   46.22    4.84
   8 -19   0   44.98    3.87
   8 -19   0   27.84    5.81
   8 -19   0   42.27    3.13
   8 -19   0   46.53    3.74
   8 -19   0   40.98    6.40
  -8 -19   0   45.68    3.67
   8  19   0   41.29    3.33
  -8  19   0   42.83    2.64
   8  19   0   39.00    3.24
   8  19   0   40.26    3.43
   9 -19   0   21.97    3.05
   9 -19   0   17.21    5.00
  -9 -19   0   14.05    2.53
   9 -19   0   14.25    3.11
   9 -19   0   16.05    3.86
   9 -19   0   18.66    4.84
  -9 -19   0   16.49    2.31
   9 -19   0   15.43    2.22
   9  19   0   19.89    2.80
   9  19   0   19.49    2.65
  -9  19   0   19.31    1.65
   9  19   0   19.13    2.73
  10 -19   0    9.47    3.26
  10 -19   0    8.69    1.84
 -10 -19   0    5.88    1.74
 -10 -19   0   10.63    1.94
  10  19   0    7.97    1.88
 -10  19   0    8.28    1.35
  10  19   0    4.82    1.63
   0 -20   0   46.88    3.79
   0 -20   0   48.20    2.52
   0 -20   0   54.12    3.03
   0 -20   0   55.11    2.77
   0 -20   0   47.51    3.48
   0  20   0   49.90    2.53
   0  20   0   48.32    2.69
   1 -20   0    0.32    0.20
   1 -20   0    1.71    0.67
  -1 -20   0    2.74    0.69
  -1 -20   0    0.25    0.40
  -1 -20   0    0.57    0.37
   1 -20   0    0.31    0.37
  -1 -20   0    0.23    0.35
   1 -20   0    4.71    0.80
  -1 -20   0    0.30    0.52
  -1 -20   0    1.64    0.87
  -1 -20   0    0.51    0.68
   1 -20   0    1.39    0.35
   1 -20   0    3.54    0.52
  -1 -20   0    0.34    0.27
  -1  20   0    0.98    0.24
   1  20   0    1.11    0.38
   1  20   0    1.78    0.54
  -1  20   0    1.48    0.31
   1  20   0    1.72    0.30
  -1  20   0    1.02    0.35
  -2 -20   0    2.76    0.82
   2 -20   0    3.65    0.77
  -2 -20   0    3.44    0.95
   2 -20   0    4.29    0.47
  -2 -20   0    3.62    1.21
   2 -20   0    5.00    0.51
  -2 -20   0    4.16    1.05
   2 -20   0    4.21    0.83
  -2 -20   0    4.33    1.41
  -2 -20   0    3.86    0.88
   2 -20   0    3.76    0.55
  -2 -20   0    3.91    0.68
  -2 -20   0    3.96    1.15
   2 -20   0    4.50    1.12
  -2 -20   0    2.92    0.64
  -2 -20   0    4.99    1.53
   2  20   0    4.41    0.57
  -2  20   0    4.25    0.35
   2  20   0    3.51    0.81
  -2  20   0    4.44    0.75
   2  20   0    6.19    0.87
  -2  20   0    4.50    0.45
  -3 -20   0    6.65    1.46
  -3 -20   0    5.68    1.07
   3 -20   0    6.08    0.70
   3 -20   0    5.65    1.12
  -3 -20   0    7.01    0.96
  -3 -20   0    5.15    1.54
   3 -20   0    4.26    0.63
  -3 -20   0    5.76    1.40
   3 -20   0    5.91    1.21
  -3 -20   0    5.32    1.74
   3 -20   0    5.79    0.59
  -3 -20   0    9.58    2.36
  -3 -20   0    5.23    1.47
   3 -20   0    5.86    0.63
   3 -20   0    5.11    1.02
   3  20   0    7.37    1.18
  -3  20   0    6.31    0.47
  -3  20   0    5.37    0.42
  -3  20   0    5.64    0.96
   3  20   0    5.93    0.66
   4 -20   0    7.11    0.72
  -4 -20   0    4.32    1.06
  -4 -20   0    8.02    2.02
  -4 -20   0    6.28    1.68
   4 -20   0    6.53    1.37
   4 -20   0    6.40    1.28
   4 -20   0    5.29    1.09
  -4 -20   0    5.50    1.58
   4 -20   0    3.73    1.29
   4 -20   0    6.01    0.81
  -4 -20   0    5.07    1.61
  -4 -20   0    7.10    2.48
  -4 -20   0    6.25    2.02
   4 -20   0    8.20    0.92
  -4 -20   0    6.00    0.99
   4  20   0    6.00    0.90
   4  20   0    6.96    0.94
   4  20   0    5.72    1.14
  -4  20   0    7.00    0.53
  -4  20   0    6.57    0.58
   5 -20   0    7.90    1.53
   5 -20   0    7.64    0.99
   5 -20   0    4.40    1.57
  -5 -20   0    7.14    1.16
  -5 -20   0    6.74    2.14
  -5 -20   0    8.06    3.09
   5 -20   0    6.52    1.38
   5 -20   0    7.57    0.69
   5 -20   0    7.93    1.04
  -5 -20   0    5.28    1.25
   5 -20   0    7.23    0.64
   5 -20   0    8.07    1.76
  -5 -20   0    8.74    2.50
   5 -20   0    6.41    0.64
  -5 -20   0    6.21    1.71
  -5 -20   0    8.68    2.37
  -5 -20   0    7.82    2.01
   5  20   0    6.76    1.04
   5  20   0    6.37    1.29
  -5  20   0    6.45    0.75
   5  20   0    8.04    1.20
  -5  20   0    7.55    0.65
  -6 -20   0    1.66    1.44
   6 -20   0    0.44    0.52
   6 -20   0    2.84    1.63
  -6 -20   0    1.00    1.03
  -6 -20   0    0.90    1.29
   6 -20   0    1.56    1.26
   6 -20   0    0.61    0.57
   6 -20   0    0.53    0.41
  -6 -20   0    1.68    1.86
   6 -20   0    0.21    0.63
   6 -20   0    0.54    0.33
  -6 -20   0    0.66    0.71
   6 -20   0    0.29    0.49
  -6 -20   0    1.48    1.40
   6 -20   0    0.23    0.72
  -6 -20   0    0.63    0.61
   6  20   0    0.99    0.76
   6  20   0    1.03    0.64
  -6  20   0    0.66    0.37
   6  20   0    0.30    0.51
   7 -20   0    1.73    1.03
   7 -20   0    1.76    0.92
   7 -20   0    2.88    0.89
   7 -20   0   -0.16    1.20
   7 -20   0    0.97    0.77
   7 -20   0    2.39    1.68
   7 -20   0    0.20    0.71
   7 -20   0    0.13    0.48
  -7 -20   0    0.54    0.72
   7 -20   0    0.82    0.99
  -7 -20   0    0.48    0.61
   7  20   0    0.78    0.71
  -7  20   0    0.06    0.37
   7  20   0    0.02    0.61
   7  20   0    2.56    0.95
   8 -20   0    0.01    0.93
   8 -20   0    0.02    0.69
   8 -20   0    1.61    1.71
   8 -20   0    0.61    1.12
   8 -20   0    0.28    1.06
  -8 -20   0   -0.07    0.64
   8 -20   0    0.65    1.07
  -8 -20   0    1.12    0.93
   8 -20   0    0.64    1.75
   8 -20   0    0.99    0.83
   8 -20   0    0.87    0.70
   8  20   0    1.86    0.90
  -8  20   0   -0.22    0.40
   8  20   0    0.61    0.85
   8  20   0    0.50    0.79
  -9 -20   0    0.63    0.95
   9 -20   0    1.34    2.39
   9 -20   0    1.93    1.02
   9 -20   0    4.22    2.85
  -9 -20   0    1.26    0.86
   9 -20   0    0.59    1.32
   9 -20   0    0.97    1.49
   9 -20   0    1.17    0.87
   9  20   0   -0.01    0.82
   9  20   0    2.03    0.98
  -9  20   0    1.63    0.68
 -10 -20   0    0.56    1.10
 -10 -20   0    0.82    0.93
  10 -20   0    1.22    0.95
  10  20   0   -0.73    0.79
  10  20   0    0.88    1.01
 -10  20   0    0.13    0.53
   0 -21   0    0.26    0.61
   0 -21   0    0.28    0.46
   0 -21   0    0.87    0.41
   0 -21   0    0.24    0.20
   0 -21   0    0.20    0.33
   0  21   0    0.30    0.18
   0  21   0    0.40    0.23
   0  21   0    0.53    0.30
   1 -21   0    6.96    0.74
   1 -21   0    5.50    0.96
  -1 -21   0    7.46    1.02
  -1 -21   0    6.47    0.77
   1 -21   0    6.05    0.95
  -1 -21   0    6.90    1.15
  -1 -21   0    5.09    0.96
  -1 -21   0    5.11    1.21
  -1 -21   0    5.72    1.13
   1 -21   0    6.06    1.30
   1 -21   0    6.51    0.78
  -1 -21   0    8.25    1.72
   1 -21   0    7.33    0.59
  -1 -21   0    6.48    1.61
   1  21   0    7.73    0.89
  -1  21   0    6.68    0.67
   1  21   0    7.00    0.54
   1  21   0    6.86    0.97
  -1  21   0    7.89    0.84
  -2 -21   0    6.88    1.19
   2 -21   0    6.39    1.06
   2 -21   0    6.34    0.63
  -2 -21   0    4.96    0.75
  -2 -21   0    5.14    1.07
  -2 -21   0    4.91    0.82
  -2 -21   0    4.43    1.33
  -2 -21   0    4.85    1.31
  -2 -21   0    4.83    1.14
   2 -21   0    3.97    0.61
  -2 -21   0    8.63    2.12
  -2 -21   0    5.16    1.56
   2 -21   0    5.69    1.21
   2 -21   0    4.00    0.96
  -2 -21   0    5.46    1.19
   2 -21   0    5.79    0.51
   2  21   0    5.69    0.88
   2  21   0    4.40    0.92
   2  21   0    5.73    0.64
  -2  21   0    4.78    0.39
  -2  21   0    5.65    0.44
  -2  21   0    6.48    0.90
   3 -21   0    8.26    1.42
  -3 -21   0   12.03    2.04
  -3 -21   0   10.42    1.82
   3 -21   0    9.97    0.76
   3 -21   0    8.20    0.76
  -3 -21   0   12.47    2.55
  -3 -21   0    8.53    2.31
   3 -21   0    7.98    1.30
  -3 -21   0    7.29    1.82
  -3 -21   0    7.50    1.76
  -3 -21   0    9.83    1.15
   3 -21   0    8.47    0.82
   3 -21   0   10.77    1.66
   3 -21   0    8.42    0.66
  -3 -21   0    9.16    1.44
   3  21   0   10.10    0.83
  -3  21   0    8.65    0.55
   3  21   0    9.33    1.38
  -3  21   0    9.78    1.25
  -3  21   0    9.74    0.59
   4 -21   0   28.98    2.98
   4 -21   0   26.34    2.28
  -4 -21   0   24.35    3.92
  -4 -21   0   33.27    4.13
   4 -21   0   31.00    1.86
   4 -21   0   28.35    1.70
  -4 -21   0   30.69    3.97
  -4 -21   0   33.63    5.54
   4 -21   0   32.08    3.13
  -4 -21   0   34.67    2.58
  -4 -21   0   36.61    3.49
   4 -21   0   29.50    2.50
  -4 -21   0   25.13    3.37
  -4 -21   0   33.08    2.21
   4  21   0   30.49    2.00
   4  21   0   31.03    1.96
   4  21   0   27.36    2.32
  -4  21   0   32.94    1.56
  -4  21   0   31.06    1.60
  -5 -21   0   30.31    2.62
   5 -21   0   33.94    1.81
  -5 -21   0   33.92    4.50
   5 -21   0   23.10    3.73
   5 -21   0   30.62    1.70
  -5 -21   0   31.66    4.03
   5 -21   0   33.91    2.75
   5 -21   0   31.74    2.07
   5 -21   0   26.60    2.90
  -5 -21   0   35.95    3.49
  -5 -21   0   29.09    4.39
  -5 -21   0   38.35    5.04
   5 -21   0   31.75    2.00
  -5 -21   0   29.16    5.49
   5 -21   0   34.03    2.84
  -5 -21   0   27.21    2.20
   5 -21   0   30.30    1.67
  -5  21   0   29.96    1.71
   5  21   0   31.82    2.56
   5  21   0   30.66    2.15
  -5  21   0   32.59    1.70
   5  21   0   28.34    2.15
  -6 -21   0   12.88    1.68
  -6 -21   0    8.85    2.64
   6 -21   0   11.07    2.52
  -6 -21   0   15.41    2.18
  -6 -21   0   15.62    3.62
   6 -21   0   13.31    1.57
   6 -21   0   10.97    2.90
  -6 -21   0   10.26    3.66
   6 -21   0   11.07    1.01
  -6 -21   0    9.77    2.87
   6 -21   0   10.96    1.12
   6 -21   0   11.43    1.70
   6 -21   0   12.61    1.68
   6 -21   0   11.66    1.98
   6 -21   0   14.74    2.21
   6  21   0   11.49    1.57
   6  21   0   12.55    1.90
  -6  21   0   11.21    0.97
   6  21   0   11.53    1.51
  -7 -21   0   34.69    3.64
   7 -21   0   29.89    3.77
   7 -21   0   30.42    4.92
   7 -21   0   33.87    3.16
  -7 -21   0   36.12    2.69
   7 -21   0   32.82    2.72
   7 -21   0   24.78    4.89
   7 -21   0   35.31    2.58
   7 -21   0   27.41    2.84
   7 -21   0   26.94    3.43
   7 -21   0   32.88    3.57
   7  21   0   31.18    2.59
  -7  21   0   33.78    2.02
   7  21   0   34.61    2.94
   7  21   0   28.82    2.55
   8 -21   0   21.19    3.09
  -8 -21   0   16.43    2.21
   8 -21   0   16.78    4.52
   8 -21   0   17.04    2.16
   8 -21   0   18.37    3.30
   8 -21   0   16.68    3.09
   8 -21   0   20.36    3.68
   8 -21   0   15.38    3.99
  -8 -21   0   19.47    2.82
   8 -21   0   23.17    3.66
   8 -21   0   20.86    2.87
   8  21   0   20.66    2.58
   8  21   0   17.54    2.60
  -8  21   0   16.55    1.44
   8  21   0   18.67    2.76
  -9 -21   0   28.89    3.59
   9 -21   0   23.68    2.80
   9 -21   0   19.04    4.69
   9 -21   0   28.64    6.21
   9 -21   0   23.91    3.32
   9 -21   0   19.23    5.40
   9 -21   0   18.91    3.68
  -9 -21   0   26.38    2.92
   9  21   0   23.45    3.05
   9  21   0   23.19    2.95
  -9  21   0   19.65    1.73
 -10 -21   0    5.94    1.58
 -10 -21   0    6.72    1.94
  10 -21   0    7.56    1.74
 -10  21   0    7.70    1.26
  10  21   0    6.86    1.90
  10  21   0    5.74    1.69
   0 -22   0   83.58    4.49
   0 -22   0   87.29    4.20
   0 -22   0   79.91    5.51
   0 -22   0   79.97    3.91
   0 -22   0   81.31    5.08
   0  22   0   78.77    3.87
   0  22   0   79.57    4.08
  -1 -22   0   95.01    5.47
   1 -22   0  102.09    5.07
  -1 -22   0  100.95    6.08
   1 -22   0  115.15    5.02
  -1 -22   0  106.52    5.83
  -1 -22   0   96.67    5.36
  -1 -22   0  103.13    6.85
   1 -22   0  103.11    4.82
  -1 -22   0  106.58    6.62
   1 -22   0  104.53    5.57
   1 -22   0   88.56    6.05
   1 -22   0   97.99    5.28
  -1 -22   0  104.05    5.57
  -1 -22   0  104.80    4.98
  -1  22   0  104.15    4.77
   1  22   0  102.58    4.72
   1  22   0  108.72    5.09
  -1  22   0  109.01    5.04
  -1  22   0  107.15    4.87
   1  22   0  100.61    5.28
  -2 -22   0   13.19    2.09
  -2 -22   0   15.11    2.67
  -2 -22   0   10.38    1.59
  -2 -22   0   11.49    2.10
  -2 -22   0   14.13    1.97
   2 -22   0   14.21    1.60
   2 -22   0   10.39    1.65
  -2 -22   0   15.52    2.81
   2 -22   0   13.21    1.08
  -2 -22   0   15.18    2.09
   2 -22   0   13.08    0.95
  -2 -22   0   15.21    1.77
   2 -22   0   15.05    0.96
  -2 -22   0   11.65    1.22
   2 -22   0   14.55    1.99
  -2 -22   0   11.71    1.35
  -2  22   0   13.89    0.74
   2  22   0   12.53    0.88
  -2  22   0   13.94    0.78
   2  22   0   10.60    1.47
   2  22   0   14.25    1.42
  -2  22   0   12.75    1.17
   3 -22   0   12.07    1.88
   3 -22   0   13.54    1.72
  -3 -22   0   13.20    2.30
  -3 -22   0   17.24    3.08
  -3 -22   0   16.95    1.98
  -3 -22   0   12.75    1.37
  -3 -22   0   15.20    2.45
  -3 -22   0   13.24    3.03
   3 -22   0   15.24    1.08
   3 -22   0   13.59    0.98
   3 -22   0   12.50    1.86
   3 -22   0   13.61    0.88
  -3 -22   0   18.17    2.86
  -3 -22   0   13.39    2.15
   3 -22   0   11.60    1.04
   3  22   0   13.63    1.70
   3  22   0   13.88    1.15
  -3  22   0   13.66    0.71
  -3  22   0   12.90    0.73
   3  22   0   14.59    1.02
  -4 -22   0    7.71    1.99
  -4 -22   0    8.20    1.44
  -4 -22   0    7.88    2.85
   4 -22   0    8.51    0.96
   4 -22   0    6.12    1.20
  -4 -22   0    7.70    1.15
   4 -22   0    7.21    1.70
  -4 -22   0    7.53    1.92
   4 -22   0    8.47    1.50
  -4 -22   0   12.06    2.48
  -4 -22   0    9.28    2.08
   4 -22   0    7.34    1.51
  -4 -22   0    7.92    2.31
   4  22   0    7.46    1.33
  -4  22   0    8.34    0.57
   4  22   0    7.05    0.90
   4  22   0    6.55    0.89
  -4  22   0    8.64    0.56
   5 -22   0    3.89    0.42
  -5 -22   0    7.51    2.25
  -5 -22   0    6.61    2.12
   5 -22   0    3.74    0.48
   5 -22   0    4.35    1.23
   5 -22   0    5.81    1.52
  -5 -22   0    5.14    1.25
   5 -22   0    3.52    0.57
   5 -22   0    4.21    1.64
   5 -22   0    4.19    0.81
  -5 -22   0    4.32    0.97
  -5 -22   0    3.70    1.50
  -5 -22   0    5.98    2.71
  -5 -22   0    5.17    1.62
   5 -22   0    3.62    1.17
  -5 -22   0    6.31    2.09
   5  22   0    4.15    0.82
   5  22   0    4.24    0.87
   5  22   0    3.84    1.04
  -5  22   0    4.43    0.54
  -6 -22   0    3.44    1.76
   6 -22   0    1.14    0.62
   6 -22   0    0.54    0.57
  -6 -22   0    1.93    1.43
   6 -22   0    1.30    0.98
   6 -22   0    1.00    0.81
   6 -22   0    0.21    0.27
  -6 -22   0   -0.36    0.47
   6 -22   0    1.15    0.43
   6 -22   0    0.59    0.56
   6 -22   0    1.13    1.32
  -6 -22   0    0.23    0.64
  -6 -22   0   -0.21    1.60
   6 -22   0    1.15    1.13
   6  22   0    0.75    0.62
   6  22   0   -0.02    0.48
   6  22   0    0.45    0.62
  -6  22   0    1.06    0.38
   7 -22   0    3.49    1.29
   7 -22   0    2.69    1.99
   7 -22   0    1.71    1.01
   7 -22   0    1.71    1.00
   7 -22   0    2.39    0.84
  -7 -22   0    2.37    0.90
   7 -22   0    2.34    0.86
   7 -22   0    3.09    1.43
  -7 -22   0    2.66    1.12
   7 -22   0    2.31    1.01
   7 -22   0    3.31    1.79
   7  22   0    3.13    1.15
   7  22   0    3.12    1.06
  -7  22   0    2.16    0.55
   7  22   0    2.49    0.95
   8 -22   0    1.09    1.17
   8 -22   0    4.40    2.42
  -8 -22   0    1.84    1.05
   8 -22   0    2.07    1.06
   8 -22   0    2.23    0.97
   8 -22   0    3.79    1.39
   8 -22   0    2.26    2.35
   8 -22   0    3.38    1.62
   8 -22   0    2.57    1.48
  -8 -22   0    3.08    1.04
   8  22   0    3.58    1.19
  -8  22   0    2.61    0.67
   8  22   0    3.63    1.29
  -9 -22   0    0.88    0.84
   9 -22   0    0.65    2.33
   9 -22   0    0.89    1.02
   9 -22   0    3.29    2.61
   9 -22   0    0.84    0.88
  -9 -22   0   -0.24    0.85
   9  22   0    1.84    1.01
   9  22   0    0.25    0.95
  -9  22   0    0.29    0.49
 -10 -22   0    6.67    1.94
  10 -22   0    6.90    1.68
 -10 -22   0    5.40    1.57
 -10  22   0    6.24    1.17
  10  22   0    7.34    2.07
  10  22   0    8.09    1.96
   0 -23   0    0.53    0.42
   0 -23   0    1.64    0.89
   0 -23   0    0.95    0.30
   0 -23   0    1.36    0.61
   0 -23   0    0.60    0.56
   0  23   0    1.08    0.37
   1 -23   0   26.42    1.92
  -1 -23   0   26.90    2.31
  -1 -23   0   28.82    2.17
   1 -23   0   22.95    2.59
   1 -23   0   28.45    1.52
  -1 -23   0   28.10    3.05
  -1 -23   0   29.85    1.68
   1 -23   0   26.34    2.12
  -1 -23   0   23.80    2.12
  -1 -23   0   25.18    2.50
  -1 -23   0   28.21    2.13
   1 -23   0   26.70    1.83
  -1 -23   0   27.70    2.87
   1 -23   0   31.75    1.75
  -1  23   0   26.49    1.45
   1  23   0   25.96    1.36
   1  23   0   24.40    1.85
   1  23   0   27.14    1.73
  -1  23   0   28.01    1.69
  -1  23   0   26.28    1.53
   2 -23   0   18.44    1.41
  -2 -23   0   23.05    3.53
  -2 -23   0   15.41    2.37
  -2 -23   0   16.70    2.85
   2 -23   0   20.84    1.75
  -2 -23   0   22.07    1.92
  -2 -23   0   17.40    2.30
   2 -23   0   15.94    2.24
   2 -23   0   20.33    1.30
  -2 -23   0   17.45    1.55
  -2 -23   0   18.18    1.40
   2 -23   0   20.62    1.28
   2 -23   0   15.86    2.23
  -2 -23   0   22.04    2.21
  -2 -23   0   16.50    2.59
   2  23   0   19.75    1.75
  -2  23   0   19.77    0.99
  -2  23   0   19.68    1.02
  -2  23   0   21.54    1.53
   2  23   0   21.35    1.55
   2  23   0   19.66    1.11
   3 -23   0   25.86    2.22
   3 -23   0   23.45    1.72
   3 -23   0   29.36    1.63
  -3 -23   0   24.27    1.83
  -3 -23   0   31.39    2.41
  -3 -23   0   29.26    2.97
   3 -23   0   29.70    3.06
  -3 -23   0   33.55    4.27
  -3 -23   0   27.26    3.41
  -3 -23   0   20.93    3.13
  -3 -23   0   27.46    2.81
   3 -23   0   24.22    2.56
  -3 -23   0   27.74    4.32
   3  23   0   27.19    1.57
   3  23   0   31.48    1.83
   3  23   0   27.78    2.25
   4 -23   0   29.78    2.55
   4 -23   0   25.63    2.96
  -4 -23   0   31.16    4.10
  -4 -23   0   30.49    3.24
  -4 -23   0   33.42    2.67
   4 -23   0   27.98    3.13
  -4 -23   0   33.51    4.60
  -4 -23   0   31.89    3.97
  -4 -23   0   30.01    2.16
  -4 -23   0   27.60    5.24
  -4 -23   0   30.41    4.09
   4 -23   0   29.23    1.85
   4 -23   0   27.81    2.34
  -4  23   0   32.31    1.47
  -4  23   0   29.91    1.45
   4  23   0   29.57    1.88
   4  23   0   32.36    2.57
   4  23   0   29.83    1.81
   5 -23   0    1.07    1.12
  -5 -23   0    0.90    1.15
   5 -23   0    0.53    0.18
   5 -23   0    1.36    0.93
   5 -23   0   -0.31    0.35
  -5 -23   0    0.29    0.89
  -5 -23   0    1.07    0.62
   5 -23   0    2.15    1.01
  -5 -23   0    2.06    1.39
   5 -23   0    0.21    0.17
   5 -23   0    0.19    0.66
  -5 -23   0    0.13    0.71
   5 -23   0    1.39    0.52
  -5 -23   0    0.81    1.13
  -5 -23   0   -0.04    0.63
  -5 -23   0    3.27    2.15
   5  23   0    1.33    0.53
   5  23   0    0.23    0.71
   5  23   0    1.21    0.52
  -5  23   0    0.82    0.25
  -6 -23   0   -0.18    0.58
   6 -23   0    0.13    0.46
   6 -23   0    0.64    0.56
   6 -23   0    0.03    0.91
   6 -23   0   -0.34    0.86
  -6 -23   0   -0.66    0.93
   6 -23   0   -0.29    0.39
  -6 -23   0    0.14    0.55
   6 -23   0   -0.67    0.79
   6 -23   0    0.15    0.25
   6 -23   0   -0.14    0.28
   6 -23   0   -0.09    0.63
   6  23   0   -0.01    0.68
   6  23   0   -0.35    0.45
  -6  23   0    0.00    0.23
   6  23   0   -0.12    0.47
   7 -23   0   10.93    1.70
   7 -23   0   11.50    3.03
   7 -23   0    9.68    3.00
   7 -23   0   11.51    2.25
   7 -23   0   10.55    1.91
   7 -23   0   11.16    2.09
  -7 -23   0   12.64    1.85
  -7 -23   0   15.67    2.49
   7 -23   0   10.12    1.52
   7 -23   0   10.89    2.06
   7 -23   0    7.16    1.81
   7  23   0   12.77    2.12
   7  23   0   10.64    1.69
  -7  23   0   12.09    1.03
   8 -23   0    3.53    2.29
   8 -23   0    1.84    2.02
   8 -23   0    4.27    1.79
  -8 -23   0    4.21    1.20
   8 -23   0    2.55    1.58
  -8 -23   0    1.84    1.12
   8 -23   0    2.95    1.87
   8 -23   0    4.50    1.57
   8 -23   0    2.03    0.98
   8 -23   0    3.60    1.36
  -8  23   0    3.30    0.70
   8  23   0    2.35    1.13
   8  23   0    2.61    1.05
   9 -23   0   10.23    4.31
   9 -23   0    7.13    4.40
   9 -23   0    6.20    1.50
  -9 -23   0    5.24    1.40
   9 -23   0    6.26    1.76
  -9 -23   0    5.03    1.81
   9  23   0    4.58    1.64
  -9  23   0    6.18    1.01
   9  23   0    5.28    1.65
  10 -23   0    2.98    1.28
   0 -24   0  133.17    6.55
   0 -24   0  140.67    6.46
   0 -24   0  130.58    6.59
   0 -24   0  140.07    7.80
   0 -24   0  142.69    8.43
   0 -24   0  148.37    7.17
   0  24   0  140.46    6.36
   0  24   0  141.49    6.64
  -1 -24   0   28.74    2.72
   1 -24   0   25.43    2.16
  -1 -24   0   29.31    2.39
  -1 -24   0   29.34    3.25
   1 -24   0   32.78    1.88
  -1 -24   0   28.46    2.26
  -1 -24   0   30.44    2.31
   1 -24   0   26.41    1.91
  -1 -24   0   28.20    2.89
   1 -24   0   26.47    2.80
   1 -24   0   26.44    1.55
  -1 -24   0   27.70    1.70
  -1 -24   0   28.55    2.44
   1  24   0   25.22    1.92
   1  24   0   27.92    1.79
  -1  24   0   28.64    1.52
  -1  24   0   28.88    1.73
   1  24   0   27.01    1.35
  -1  24   0   30.52    1.61
   2 -24   0   32.57    3.11
  -2 -24   0   32.26    3.18
  -2 -24   0   43.25    2.87
   2 -24   0   29.91    3.24
   2 -24   0   36.65    2.31
  -2 -24   0   34.78    2.22
  -2 -24   0   42.85    3.32
   2 -24   0   41.41    2.73
  -2 -24   0   35.26    3.44
  -2 -24   0   33.80    3.00
  -2 -24   0   41.83    3.89
   2 -24   0   44.49    2.21
  -2 -24   0   43.01    4.28
  -2 -24   0   34.75    2.45
  -2  24   0   37.97    1.75
   2  24   0   37.84    2.42
   2  24   0   37.61    2.62
  -2  24   0   37.72    1.74
   2  24   0   37.24    1.78
   2  24   0   35.98    1.80
  -3 -24   0   14.82    2.62
   3 -24   0   13.16    1.00
  -3 -24   0   11.62    2.19
   3 -24   0   16.08    2.19
  -3 -24   0   15.86    2.91
  -3 -24   0   11.79    2.96
   3 -24   0   11.39    1.11
   3 -24   0   12.40    1.73
  -3 -24   0   11.67    2.23
  -3 -24   0   13.89    1.43
  -3 -24   0   15.06    1.91
   3 -24   0   10.37    1.91
  -3 -24   0   14.64    2.40
   3  24   0   11.91    1.00
   3  24   0   11.07    1.62
   3  24   0   14.45    0.92
   4 -24   0   11.21    1.62
   4 -24   0    9.02    2.10
   4 -24   0   11.86    2.02
  -4 -24   0   13.53    1.91
  -4 -24   0   13.49    2.57
  -4 -24   0   14.28    2.73
  -4 -24   0    7.96    2.90
  -4 -24   0   11.01    2.52
  -4 -24   0    9.95    2.11
  -4 -24   0   17.23    3.15
   4 -24   0   10.76    1.01
  -4 -24   0   13.10    1.51
   4 -24   0   14.21    1.92
   4  24   0   10.57    0.98
   4  24   0   12.57    1.80
  -5 -24   0   14.88    4.19
   5 -24   0   10.48    0.71
   5 -24   0    7.79    2.32
   5 -24   0   12.29    2.08
  -5 -24   0    9.14    2.82
  -5 -24   0   11.28    1.52
  -5 -24   0    9.02    2.51
   5 -24   0   10.08    1.85
   5 -24   0    9.00    1.92
   5 -24   0   10.23    1.21
  -5 -24   0   12.87    1.97
  -5 -24   0   10.67    2.78
  -5 -24   0   11.09    2.42
   5 -24   0    9.56    0.65
  -5 -24   0   14.29    3.15
   5  24   0    7.95    1.38
   5  24   0   11.80    1.81
  -5  24   0    9.67    0.64
   5  24   0    9.67    1.21
   6 -24   0    0.60    0.29
   6 -24   0   -0.08    0.46
  -6 -24   0    0.83    0.65
  -6 -24   0    3.17    1.81
   6 -24   0    4.69    1.79
   6 -24   0    0.96    0.97
   6 -24   0    1.34    0.41
   6 -24   0    0.47    0.81
   6 -24   0    1.08    0.60
  -6 -24   0   -0.39    0.59
   6 -24   0    0.22    1.12
   6 -24   0    1.82    0.71
   6  24   0    1.25    0.63
   6  24   0    1.76    0.90
  -6  24   0    0.86    0.31
   7 -24   0   -0.23    0.60
   7 -24   0   -0.01    0.49
   7 -24   0    1.36    1.68
   7 -24   0    0.56    0.66
   7 -24   0    0.36    0.78
  -7 -24   0    0.21    0.64
   7 -24   0   -0.08    0.76
   7 -24   0    0.93    0.85
   7 -24   0   -0.86    1.17
  -7 -24   0    0.31    0.79
   7 -24   0   -0.57    0.85
   7  24   0    0.22    0.67
  -7  24   0   -0.09    0.32
   7  24   0    0.12    0.58
   8 -24   0    3.47    1.77
   8 -24   0    2.59    2.22
   8 -24   0    3.31    1.09
  -8 -24   0    2.06    0.97
   8 -24   0    1.77    1.40
   8 -24   0    3.37    2.28
  -8 -24   0    2.47    1.29
   8 -24   0    4.02    1.43
   8  24   0    1.17    1.04
  -8  24   0    1.68    0.54
   9 -24   0    4.18    3.13
   9 -24   0    2.06    1.03
  -9 -24   0    2.26    1.17
  -9 -24   0    0.39    0.94
   9  24   0    2.09    1.30
  -9  24   0    3.52    0.79
   0 -25   0    1.10    0.91
   0 -25   0    0.48    0.57
   0 -25   0    1.58    0.57
   0 -25   0    0.60    0.65
   0 -25   0    0.71    0.31
   0  25   0    0.81    0.38
   0  25   0    0.05    0.20
  -1 -25   0    4.10    0.98
  -1 -25   0    3.16    0.94
   1 -25   0    9.94    1.24
  -1 -25   0    4.94    1.16
  -1 -25   0    2.96    1.09
   1 -25   0    3.86    0.89
  -1 -25   0    8.68    1.35
  -1 -25   0    3.52    1.21
  -1 -25   0    5.68    1.66
  -1 -25   0    2.80    0.55
   1 -25   0    4.54    1.41
  -1  25   0    4.97    0.52
   1  25   0    4.82    0.75
   1  25   0    6.37    0.95
  -1  25   0    5.49    0.59
  -2 -25   0    2.50    0.92
  -2 -25   0    2.34    1.20
  -2 -25   0    1.06    0.69
   2 -25   0    1.82    0.83
   2 -25   0    1.90    0.48
   2 -25   0    1.95    0.64
   2 -25   0    1.53    0.48
  -2 -25   0    1.90    1.01
  -2 -25   0    0.78    0.47
  -2 -25   0    0.79    0.77
   2 -25   0    0.68    0.79
  -2 -25   0    1.60    0.89
  -2 -25   0    1.48    0.46
  -2 -25   0    0.58    0.85
   2  25   0    1.91    0.70
  -3 -25   0   -0.07    0.61
  -3 -25   0    4.58    1.97
  -3 -25   0    2.57    1.07
  -3 -25   0    5.71    1.61
   3 -25   0    2.47    0.97
   3 -25   0    2.82    1.16
   3 -25   0    3.26    0.58
  -3 -25   0    1.63    1.10
  -3 -25   0    2.85    0.88
  -3 -25   0    1.13    0.57
  -3 -25   0    2.87    1.42
   3 -25   0    2.84    0.62
   3 -25   0    3.72    1.03
   3  25   0    3.58    0.51
   3  25   0    3.75    0.99
   3  25   0    2.49    0.39
   4 -25   0   17.60    1.33
   4 -25   0   14.83    2.30
  -4 -25   0   15.95    2.71
  -4 -25   0   17.92    3.12
   4 -25   0   18.46    1.84
  -4 -25   0   18.08    3.07
   4 -25   0   15.15    2.65
   4 -25   0   18.30    2.28
  -4 -25   0   17.69    1.79
  -4 -25   0   14.65    3.08
  -4 -25   0   20.85    4.75
  -4 -25   0   17.70    3.22
  -4 -25   0   18.41    2.28
   4  25   0   15.58    1.21
   4  25   0   21.97    2.37
   4  25   0   15.65    1.43
   5 -25   0    3.37    1.24
  -5 -25   0    5.07    1.94
  -5 -25   0    2.80    2.28
   5 -25   0    5.95    0.95
  -5 -25   0    4.69    1.03
  -5 -25   0    9.67    2.75
  -5 -25   0    7.08    3.27
  -5 -25   0    4.72    1.34
   5 -25   0    3.83    1.81
   5 -25   0    7.12    1.58
  -5 -25   0    4.02    1.83
   5 -25   0    9.24    1.93
   5 -25   0    3.86    0.47
   5 -25   0    3.13    0.39
   5  25   0    4.96    1.25
   5  25   0    4.02    0.88
  -6 -25   0    5.61    1.51
   6 -25   0    3.25    0.58
   6 -25   0    4.32    1.44
   6 -25   0    3.68    1.95
   6 -25   0    2.72    0.82
  -6 -25   0    3.74    1.06
  -6 -25   0    4.29    2.65
   6 -25   0    4.57    0.99
   6 -25   0    4.00    1.09
   6 -25   0    3.17    0.54
   6 -25   0    4.63    1.43
  -6  25   0    3.48    0.43
   6  25   0    3.97    1.24
   7 -25   0   -0.56    0.60
   7 -25   0   -0.26    0.72
   7 -25   0    0.07    0.59
   7 -25   0    0.07    0.98
  -7 -25   0    0.16    0.68
   7 -25   0    0.04    0.51
   7 -25   0   -0.23    1.30
   7 -25   0    0.22    0.76
   7 -25   0    0.89    1.33
  -7 -25   0    0.69    0.93
   7  25   0    0.52    0.90
  -7  25   0   -0.18    0.26
   8 -25   0   -0.43    1.13
   8 -25   0   -0.86    1.65
   8 -25   0    0.17    0.66
   8 -25   0    0.48    1.26
  -8 -25   0    0.60    0.98
   8 -25   0    0.66    1.94
  -8 -25   0   -1.52    0.46
   8 -25   0    1.16    0.94
   8  25   0    0.13    0.93
  -8  25   0    0.46    0.38
   9 -25   0    1.67    0.90
   9 -25   0    3.37    2.74
  -9 -25   0    0.33    1.02
  -9 -25   0    0.53    0.92
   9  25   0    0.05    0.91
   0 -26   0   96.74    5.26
   0 -26   0  105.82    5.53
   0 -26   0   95.88    6.58
   0 -26   0  103.18    6.04
   0 -26   0   90.74    5.30
   0  26   0   91.58    4.67
   0  26   0  101.08    4.86
  -1 -26   0   61.46    4.27
  -1 -26   0   67.51    3.45
  -1 -26   0   71.64    4.54
  -1 -26   0   69.31    5.53
   1 -26   0   67.17    5.10
  -1 -26   0   65.47    4.69
  -1 -26   0   67.45    4.23
   1 -26   0   68.55    4.12
   1 -26   0   62.18    3.81
  -1 -26   0   73.36    5.08
  -1 -26   0   64.15    4.06
  -1  26   0   66.16    3.20
   1  26   0   68.19    3.76
  -1  26   0   68.64    3.27
  -2 -26   0   68.48    4.92
   2 -26   0   62.09    5.04
  -2 -26   0   72.87    5.00
  -2 -26   0   73.63    5.16
  -2 -26   0   75.61    4.46
  -2 -26   0   71.60    4.15
   2 -26   0   75.75    3.85
  -2 -26   0   70.73    5.32
   2 -26   0   76.28    4.93
   2 -26   0   72.59    3.97
  -2 -26   0   69.87    3.78
   2 -26   0   71.11    4.26
  -2 -26   0   77.25    5.69
  -2 -26   0   68.34    6.02
   2  26   0   69.55    4.18
  -3 -26   0   25.82    4.52
  -3 -26   0   23.87    3.32
   3 -26   0   25.09    2.95
  -3 -26   0   29.46    4.05
   3 -26   0   24.37    2.17
  -3 -26   0   22.48    3.16
   3 -26   0   21.76    1.72
  -3 -26   0   22.78    1.75
   3 -26   0   23.63    1.57
   3 -26   0   19.80    3.00
  -3 -26   0   22.55    3.10
  -3 -26   0   28.15    3.74
  -3 -26   0   24.61    2.24
   3  26   0   20.78    2.34
   3  26   0   23.93    1.23
   3  26   0   21.89    1.25
   4 -26   0    8.11    1.59
  -4 -26   0   13.13    2.48
  -4 -26   0    9.32    1.26
  -4 -26   0   14.82    2.08
  -4 -26   0    9.59    3.48
  -4 -26   0    8.86    2.41
   4 -26   0    8.09    1.43
   4 -26   0   10.71    1.98
  -4 -26   0   10.05    2.39
  -4 -26   0    7.73    2.31
   4 -26   0    9.16    1.09
   4 -26   0    6.95    1.97
  -4 -26   0   13.12    2.66
   4  26   0   10.77    1.30
   4  26   0   10.17    1.69
  -5 -26   0    5.51    1.10
  -5 -26   0    6.11    2.95
   5 -26   0    6.66    1.00
   5 -26   0    3.38    1.28
   5 -26   0    3.39    1.71
  -5 -26   0    6.02    2.30
  -5 -26   0    6.14    2.17
   5 -26   0    6.23    0.59
   5 -26   0    4.02    1.33
   5 -26   0    5.31    0.48
  -5 -26   0    5.37    2.13
  -5 -26   0    7.11    1.64
   5 -26   0    4.45    1.38
   5  26   0    5.79    1.40
   6 -26   0    2.37    1.19
   6 -26   0    0.50    0.87
   6 -26   0    0.52    1.20
   6 -26   0    1.74    1.54
  -6 -26   0    3.62    1.29
   6 -26   0    2.43    0.79
  -6 -26   0    1.77    0.82
   6 -26   0    2.45    0.91
   6 -26   0    3.28    0.88
   6 -26   0    2.63    0.54
   6 -26   0    3.02    0.52
   6  26   0    2.38    1.12
   7 -26   0   -0.58    0.93
   7 -26   0    0.87    0.71
   7 -26   0    0.39    0.75
  -7 -26   0    0.13    0.64
   7 -26   0    0.35    1.27
   7 -26   0    2.08    1.94
  -7 -26   0   -0.14    0.84
   7 -26   0    0.34    0.85
   7 -26   0   -0.64    0.72
   7  26   0   -0.71    0.70
   8 -26   0    1.18    1.87
   8 -26   0    2.21    0.97
  -8 -26   0   -0.04    0.87
  -8 -26   0   -0.11    0.74
   8 -26   0    1.97    2.32
   8 -26   0    1.21    1.55
   8 -26   0    2.36    1.23
   8 -26   0    1.45    1.46
   8  26   0    1.55    1.14
  -9 -26   0   -0.45    0.81
   9 -26   0    3.46    1.21
  -9 -26   0    2.78    1.51
   9 -26   0    2.63    3.04
   9  26   0    0.55    1.08
   0 -27   0    0.43    0.55
   0 -27   0    0.64    0.78
   0 -27   0    0.48    0.48
   0 -27   0    0.12    0.48
   0 -27   0    0.52    0.59
   0  27   0    0.65    0.33
  -1 -27   0    7.30    1.51
   1 -27   0    5.69    1.12
  -1 -27   0    7.57    1.39
  -1 -27   0    6.31    1.85
   1 -27   0    4.99    1.58
  -1 -27   0    4.75    1.40
  -1 -27   0    6.11    1.33
  -1 -27   0    6.99    1.33
  -1 -27   0    6.82    1.57
   1 -27   0    7.94    1.22
   1  27   0    5.90    0.96
  -1  27   0    6.28    0.56
  -1  27   0    6.62    0.54
   2 -27   0   18.68    1.55
  -2 -27   0   18.20    2.60
  -2 -27   0   19.13    3.00
  -2 -27   0   15.26    2.57
  -2 -27   0   15.15    3.09
   2 -27   0   12.70    2.45
  -2 -27   0   19.30    2.63
   2 -27   0   18.28    2.54
  -2 -27   0   21.06    2.81
  -2 -27   0   20.38    2.29
   2 -27   0   17.36    1.94
  -2 -27   0   19.52    1.43
   2 -27   0   17.50    1.45
  -2 -27   0   20.05    1.75
   2  27   0   17.03    1.93
  -3 -27   0    1.12    0.81
   3 -27   0    2.52    0.87
   3 -27   0    0.57    0.88
  -3 -27   0    1.49    0.84
   3 -27   0    2.14    0.53
  -3 -27   0    1.13    1.03
  -3 -27   0    2.55    1.23
  -3 -27   0    1.28    1.36
  -3 -27   0    1.08    0.96
   3 -27   0    1.21    0.89
  -3 -27   0    0.60    0.45
  -3 -27   0    0.82    0.99
   3 -27   0    1.21    0.48
   3  27   0    2.30    0.83
  -4 -27   0    2.23    1.94
   4 -27   0    1.44    1.08
   4 -27   0    0.44    0.41
  -4 -27   0    1.46    1.13
   4 -27   0    0.36    0.53
  -4 -27   0    1.19    1.30
  -4 -27   0    0.62    0.56
  -4 -27   0    0.41    0.90
  -4 -27   0   -0.04    0.90
  -4 -27   0    1.58    1.06
  -4 -27   0    0.37    0.64
   4 -27   0    0.73    0.80
   4 -27   0    0.58    0.76
   4  27   0    1.27    0.85
  -5 -27   0    5.39    2.18
   5 -27   0    5.94    0.71
  -5 -27   0    5.44    2.25
  -5 -27   0    6.84    1.62
   5 -27   0    6.71    1.60
   5 -27   0    7.42    1.77
   5 -27   0    2.44    1.46
   5 -27   0    4.63    0.49
  -5 -27   0    5.31    1.15
  -5 -27   0    7.61    3.48
   5 -27   0    3.79    1.33
   5 -27   0    8.34    1.17
   5  27   0    5.56    1.45
   6 -27   0    9.36    2.04
  -6 -27   0   15.15    2.37
  -6 -27   0   13.57    1.82
   6 -27   0    8.58    1.91
   6 -27   0    9.03    2.42
   6 -27   0   11.28    1.48
   6 -27   0   12.25    0.94
   6 -27   0   12.52    3.34
   6 -27   0   10.74    1.55
   6 -27   0    9.76    0.90
   6  27   0   11.09    2.01
   7 -27   0    6.65    1.74
   7 -27   0    8.85    3.26
   7 -27   0    9.48    1.60
   7 -27   0    9.49    1.74
   7 -27   0    6.79    1.94
  -7 -27   0    7.49    1.92
   7 -27   0   12.35    2.37
   7 -27   0    4.42    2.35
  -7 -27   0   11.91    1.84
   7  27   0    8.72    1.95
   8 -27   0   11.00    1.83
  -8 -27   0   12.85    1.98
   8 -27   0    7.35    2.32
  -8 -27   0   11.62    2.51
   8 -27   0    6.12    3.24
   8 -27   0   10.27    2.58
   8 -27   0    5.80    2.97
   8  27   0    9.41    2.13
  -9 -27   0    3.52    1.29
   9 -27   0    3.72    3.28
  -9 -27   0    2.34    1.46
   9  27   0    4.25    1.80
   0 -28   0   16.20    2.23
   0 -28   0   22.46    3.28
   0 -28   0   20.62    2.22
   0 -28   0   16.71    2.12
   0 -28   0   19.48    1.90
   0  28   0   20.50    1.40
  -1 -28   0   24.51    2.78
   1 -28   0   26.01    3.57
  -1 -28   0   25.71    2.55
   1 -28   0   26.15    2.13
  -1 -28   0   27.05    2.49
  -1 -28   0   28.18    2.36
   1 -28   0   24.94    2.22
  -1 -28   0   27.49    2.83
   1 -28   0   28.76    3.25
  -1 -28   0   30.73    2.77
  -1 -28   0   25.51    3.77
  -1  28   0   27.36    1.46
   1  28   0   28.16    2.01
  -1  28   0   26.02    1.42
  -2 -28   0   28.84    2.93
  -2 -28   0   28.28    2.88
  -2 -28   0   32.54    2.53
  -2 -28   0   29.20    3.00
   2 -28   0   27.72    3.21
   2 -28   0   30.80    3.32
  -2 -28   0   29.27    3.69
  -2 -28   0   28.02    4.40
   2 -28   0   27.90    2.08
  -2 -28   0   29.46    3.28
   2 -28   0   29.30    2.25
   2 -28   0   27.30    2.01
  -2 -28   0   27.45    2.23
   2  28   0   23.96    2.14
  -3 -28   0   19.62    2.97
  -3 -28   0   14.37    2.60
   3 -28   0   22.04    2.81
  -3 -28   0   21.03    3.20
  -3 -28   0   24.79    3.49
   3 -28   0   20.15    1.50
  -3 -28   0   25.42    2.25
  -3 -28   0   21.76    3.40
   3 -28   0   15.57    2.78
   3 -28   0   16.21    2.10
   3 -28   0   15.97    1.57
  -3 -28   0   14.60    3.41
   3  28   0   20.85    2.35
  -4 -28   0    2.71    1.40
  -4 -28   0    2.26    0.71
   4 -28   0    1.22    0.71
  -4 -28   0    2.87    1.49
   4 -28   0    1.81    0.58
  -4 -28   0    2.48    1.39
  -4 -28   0    2.34    1.56
   4 -28   0    2.64    1.39
   4 -28   0    1.35    0.96
   4 -28   0    2.24    0.99
  -4 -28   0    1.39    0.79
  -4 -28   0    2.23    1.34
  -4 -28   0    3.02    2.13
   4  28   0    2.14    0.99
  -5 -28   0    6.69    2.50
  -5 -28   0    7.30    1.25
  -5 -28   0    5.96    1.54
   5 -28   0    5.05    0.54
   5 -28   0    7.33    0.86
   5 -28   0    6.19    1.69
   5 -28   0    5.30    1.47
   5 -28   0    3.63    1.35
  -5 -28   0    9.42    2.78
  -5 -28   0    7.41    3.44
   5 -28   0    4.81    1.95
   5  28   0    6.66    1.55
  -6 -28   0    0.83    0.73
   6 -28   0    1.01    1.56
   6 -28   0   -0.22    0.90
   6 -28   0    0.58    0.33
  -6 -28   0    0.34    0.82
   6 -28   0    0.94    0.61
   6 -28   0   -0.17    0.73
   6 -28   0    0.68    0.31
   6 -28   0    0.55    1.22
   6  28   0    2.29    1.20
  -7 -28   0    1.92    1.20
  -7 -28   0    2.64    0.97
   7 -28   0    2.52    1.10
   7 -28   0    1.41    1.95
   7 -28   0    3.67    1.48
   7 -28   0    1.41    1.80
   7  28   0    1.69    1.17
  -8 -28   0    5.49    1.63
   8 -28   0    4.33    2.93
  -8 -28   0    4.76    1.80
   8 -28   0    4.04    2.67
   8  28   0    3.43    1.45
   0 -29   0    0.35    0.71
   0 -29   0   -0.18    0.29
   0 -29   0    0.35    0.37
   0 -29   0    0.18    0.50
   0 -29   0    0.15    0.48
   0 -29   0   -0.05    0.57
   0 -29   0    0.02    0.47
   0  29   0    0.58    0.33
   1 -29   0    1.40    0.96
   1 -29   0    2.54    0.82
  -1 -29   0    2.22    0.86
  -1 -29   0    3.99    1.56
   1 -29   0    2.89    1.35
   1 -29   0    2.27    0.82
  -1 -29   0    3.31    1.11
  -1 -29   0    2.37    1.04
  -1 -29   0    2.76    1.18
  -1 -29   0    3.16    1.12
  -1 -29   0    3.68    1.12
   1  29   0    3.32    0.74
  -1  29   0    3.36    0.40
   2 -29   0    8.67    1.28
   2 -29   0    6.50    1.09
  -2 -29   0    6.65    1.94
   2 -29   0    6.10    1.82
  -2 -29   0    7.10    1.68
  -2 -29   0    7.73    1.74
   2 -29   0    5.80    1.53
  -2 -29   0    7.14    1.69
  -2 -29   0    5.54    1.28
  -2 -29   0    6.76    1.25
  -2 -29   0    5.43    1.66
  -2 -29   0    7.67    2.39
   2  29   0    6.08    1.14
  -3 -29   0   15.83    2.62
  -3 -29   0   16.34    3.00
  -3 -29   0   10.61    2.40
   3 -29   0   13.66    2.32
  -3 -29   0   11.06    3.12
   3 -29   0   15.60    1.36
  -3 -29   0   15.84    2.85
   3 -29   0   13.25    2.66
  -3 -29   0   11.88    2.38
  -3 -29   0   19.05    2.33
   3 -29   0   15.24    1.50
   3  29   0   16.47    2.06
  -4 -29   0   13.61    2.95
   4 -29   0   14.83    2.46
  -4 -29   0   14.52    2.19
  -4 -29   0   17.40    3.34
  -4 -29   0   13.18    4.00
  -4 -29   0   13.77    2.96
   4 -29   0   13.56    1.98
   4 -29   0   11.92    2.75
  -4 -29   0   16.65    3.48
   4  29   0   13.83    2.13
  -5 -29   0    5.86    2.47
   5 -29   0    5.18    1.64
   5 -29   0    5.91    1.73
   5 -29   0    5.95    0.68
   5 -29   0    3.66    1.89
  -5 -29   0    8.78    4.41
  -5 -29   0    6.39    1.65
   5  29   0    5.90    1.59
   6 -29   0   14.80    1.16
   6 -29   0   16.48    3.28
   6 -29   0   13.85    3.51
   6 -29   0   15.24    2.61
  -6 -29   0   17.66    2.81
   6  29   0   20.80    2.80
   7 -29   0   17.48    2.94
   7 -29   0   10.27    3.66
   7 -29   0   21.90    2.64
   7 -29   0   14.16    3.58
  -7 -29   0   20.62    3.13
   7  29   0   17.77    2.81
  -8 -29   0    7.39    2.10
   8 -29   0    6.99    2.99
   8 -29   0    3.93    3.01
   8  29   0   11.86    2.48
   0 -30   0    1.59    0.79
   0 -30   0    1.59    0.78
   0 -30   0    3.22    1.43
   0 -30   0    1.01    0.57
   0 -30   0    1.21    0.75
   0 -30   0    2.24    0.75
   0 -30   0    1.92    0.87
   0  30   0    1.56    0.44
   1 -30   0    4.86    0.95
  -1 -30   0    4.76    0.66
   1 -30   0    4.47    1.66
  -1 -30   0    5.75    1.42
  -1 -30   0    4.86    1.32
   1 -30   0    6.09    1.20
   1 -30   0    5.14    0.93
   1 -30   0    4.18    1.36
   1 -30   0    6.94    1.32
  -1 -30   0    5.79    1.28
  -1 -30   0    4.79    0.71
  -1 -30   0    5.65    1.47
  -1 -30   0    5.52    1.47
  -1 -30   0    9.08    2.38
   1  30   0    6.71    1.00
  -1  30   0    5.77    0.41
  -2 -30   0    2.46    0.76
  -2 -30   0    1.97    1.14
   2 -30   0    0.99    0.52
  -2 -30   0    0.58    0.71
  -2 -30   0    1.40    0.80
  -2 -30   0    2.31    1.48
   2 -30   0    0.98    0.64
  -2 -30   0    2.57    1.18
  -2 -30   0    0.23    0.68
  -2 -30   0    1.20    1.04
   2 -30   0    1.10    0.92
   2 -30   0    1.97    1.20
   2  30   0    1.93    0.77
   3 -30   0    1.97    0.69
  -3 -30   0    0.70    0.89
  -3 -30   0    1.25    0.84
  -3 -30   0    0.80    0.93
  -3 -30   0    1.81    1.09
  -3 -30   0    1.50    1.09
   3 -30   0    2.09    1.07
  -3 -30   0    0.86    1.08
   3 -30   0   -0.23    0.95
  -3 -30   0    1.14    1.45
   3  30   0    2.39    0.90
  -4 -30   0    0.08    1.16
   4 -30   0    0.26    0.61
  -4 -30   0    0.14    1.00
  -4 -30   0   -0.64    0.99
  -4 -30   0    1.94    1.83
   4 -30   0   -0.37    0.77
  -4 -30   0    0.64    0.76
   4 -30   0    0.63    1.06
   4  30   0    0.28    0.72
   5 -30   0    3.22    1.35
  -5 -30   0    2.88    1.29
   5 -30   0    1.59    1.16
  -5 -30   0    1.69    1.63
   5 -30   0    2.39    1.53
   5  30   0    5.55    1.53
   6 -30   0    0.97    1.27
   6 -30   0    0.60    0.87
   6 -30   0    0.99    1.45
   6 -30   0    0.98    0.42
  -6 -30   0    0.68    0.92
   6  30   0    1.40    0.89
   7 -30   0    0.73    1.21
   7 -30   0    0.12    1.88
   7 -30   0    4.71    2.32
  -7 -30   0    1.40    1.17
   7  30   0    1.58    1.09
  -8 -30   0    0.95    1.16
   8 -30   0    0.68    2.15
   8  30   0    1.81    1.19
   0 -31   0    0.06    0.57
   0 -31   0    0.30    0.62
   0 -31   0    0.44    0.59
   0 -31   0    0.20    0.77
   0 -31   0    0.60    0.65
   0 -31   0    0.33    0.51
   0 -31   0    0.07    0.54
   0  31   0    0.67    0.34
   1 -31   0    7.84    1.41
  -1 -31   0    7.82    2.24
  -1 -31   0    9.94    2.05
   1 -31   0    7.20    1.17
   1 -31   0    6.92    1.27
  -1 -31   0    8.62    1.72
  -1 -31   0    7.17    0.94
  -1 -31   0    9.03    1.15
   1 -31   0   10.05    1.94
  -1 -31   0    7.24    1.62
   1 -31   0    6.38    1.89
   1 -31   0    7.96    1.41
  -1 -31   0    4.85    1.23
  -1 -31   0    7.75    1.77
   1  31   0    6.72    1.01
   2 -31   0    4.26    0.93
  -2 -31   0    3.20    1.29
  -2 -31   0    6.00    2.28
  -2 -31   0    4.86    1.49
   2 -31   0    2.71    1.12
  -2 -31   0    4.71    1.05
  -2 -31   0    4.43    1.21
   2 -31   0    5.19    1.88
  -2 -31   0    2.72    1.20
  -2 -31   0    4.04    1.40
  -2 -31   0    3.96    1.50
   2 -31   0    5.38    1.18
   2  31   0    6.48    1.15
   3 -31   0   19.85    1.92
  -3 -31   0   19.89    3.19
  -3 -31   0   20.25    2.99
   3 -31   0   18.94    3.34
  -3 -31   0   26.45    3.90
  -3 -31   0   22.94    2.70
  -3 -31   0   19.46    3.19
  -3 -31   0   21.81    3.45
   3 -31   0   19.45    2.82
   3  31   0   18.68    2.22
  -4 -31   0   20.30    4.97
   4 -31   0   11.69    2.35
  -4 -31   0   12.37    2.99
  -4 -31   0   16.59    2.40
   4 -31   0   13.78    3.05
  -4 -31   0   13.24    3.10
  -4 -31   0   17.03    3.54
   4 -31   0   16.33    2.27
   4  31   0   12.95    2.05
   5 -31   0   13.91    2.70
  -5 -31   0   21.73    2.90
   5 -31   0   13.22    3.21
  -5 -31   0   13.16    3.49
   5 -31   0   15.09    2.61
   5  31   0   21.98    2.78
   6 -31   0   10.58    3.27
   6 -31   0   15.23    3.27
  -6 -31   0   15.36    2.65
   6 -31   0   17.28    2.89
   6  31   0   13.54    2.50
   7 -31   0   33.64    6.14
   7 -31   0   33.49    5.54
  -7 -31   0   39.59    4.50
   7  31   0   29.27    3.87
   0 -32   0   11.05    1.89
   0 -32   0   13.52    1.88
   0 -32   0    9.77    1.57
   0 -32   0   15.28    2.23
   0 -32   0   10.74    1.94
   0 -32   0    9.83    2.33
   0 -32   0    9.55    1.70
   0  32   0   11.65    0.96
  -1 -32   0    2.96    1.20
  -1 -32   0    5.90    1.50
  -1 -32   0    4.74    0.87
  -1 -32   0    2.98    1.03
  -1 -32   0    4.39    1.85
   1 -32   0    3.63    1.07
   1 -32   0    2.56    1.34
   1 -32   0    6.00    1.58
  -1 -32   0    2.93    1.19
   1 -32   0    4.44    1.01
   1 -32   0    3.94    1.03
   1 -32   0    5.20    1.23
  -1 -32   0    3.91    1.28
   1  32   0    3.99    0.79
  -2 -32   0    5.12    1.11
   2 -32   0    4.85    1.04
   2 -32   0    3.60    0.57
  -2 -32   0    4.78    1.44
  -2 -32   0    4.52    1.57
   2 -32   0    2.96    0.58
   2 -32   0    3.30    1.58
  -2 -32   0    4.82    1.27
  -2 -32   0    3.42    1.41
  -2 -32   0    3.82    1.39
   2 -32   0    3.77    1.36
  -2 -32   0    5.26    1.51
  -2 -32   0    3.73    2.04
   2  32   0    2.22    0.80
  -3 -32   0    5.59    1.82
  -3 -32   0    3.53    1.54
   3 -32   0    3.47    0.97
   3 -32   0    6.24    2.08
  -3 -32   0    4.99    1.67
  -3 -32   0    5.64    1.82
   3 -32   0    4.78    1.55
   3  32   0    5.15    1.22
  -4 -32   0    0.11    0.74
  -4 -32   0    0.78    1.68
  -4 -32   0   -0.36    0.97
  -4 -32   0    0.58    1.21
   4 -32   0   -0.01    0.72
   4 -32   0    1.60    1.33
   4 -32   0    0.00    0.58
   4  32   0   -0.65    0.64
   5 -32   0    0.77    1.01
  -5 -32   0    0.62    1.94
  -5 -32   0    2.62    1.30
   5 -32   0    2.48    1.79
   5 -32   0    1.53    1.14
   5  32   0    2.18    1.08
   6 -32   0   -1.10    0.93
  -6 -32   0    1.80    1.11
   6 -32   0   -1.65    1.42
   6 -32   0   -0.26    1.10
   6  32   0    0.27    0.86
  -7 -32   0    0.80    1.40
   7 -32   0    4.86    2.36
   7  32   0    1.63    1.23
   0 -33   0    0.76    0.75
   0 -33   0    0.12    0.60
   0 -33   0    0.09    0.63
   0 -33   0    0.56    1.01
   0 -33   0    0.41    0.65
   0 -33   0    0.52    0.64
   0 -33   0    0.21    0.53
   0  33   0    0.45    0.31
   1 -33   0    5.58    1.35
  -1 -33   0    4.58    1.05
  -1 -33   0    2.83    1.18
  -1 -33   0    4.69    1.44
  -1 -33   0    4.35    1.86
   1 -33   0    3.39    0.95
  -1 -33   0    5.15    1.54
   1 -33   0    2.06    1.25
   1 -33   0    4.36    1.24
   1 -33   0    4.22    1.36
   1 -33   0    4.51    1.14
  -1 -33   0    3.79    1.15
  -1 -33   0    3.50    1.23
   1  33   0    3.34    0.76
  -2 -33   0    4.54    1.52
  -2 -33   0    4.29    1.21
   2 -33   0    5.43    0.90
  -2 -33   0    4.23    2.13
   2 -33   0    5.55    1.90
  -2 -33   0    5.86    1.65
  -2 -33   0    7.52    1.92
  -2 -33   0    4.40    1.54
   2 -33   0    6.42    1.69
   2 -33   0    5.42    1.16
  -2 -33   0    4.98    1.12
  -2 -33   0    7.51    1.98
   2  33   0    5.14    1.04
  -3 -33   0    8.31    1.75
  -3 -33   0   11.17    2.51
   3 -33   0   10.79    2.18
  -3 -33   0   11.45    2.57
   3 -33   0   13.36    1.84
  -3 -33   0   19.56    3.45
   3 -33   0   13.04    2.99
   3  33   0   13.59    1.86
   4 -33   0    8.47    2.62
  -4 -33   0   10.62    2.03
  -4 -33   0   13.90    3.09
  -4 -33   0    9.44    2.85
  -4 -33   0   10.90    4.00
   4 -33   0    8.20    1.74
   4 -33   0    6.42    1.80
   4  33   0    8.86    1.73
   5 -33   0    5.04    1.82
   5 -33   0    4.16    1.91
  -5 -33   0    4.16    1.45
   5 -33   0    3.18    1.42
   5  33   0    6.13    1.68
   6 -33   0   14.35    3.29
   6 -33   0   15.69    4.24
  -6 -33   0   23.52    3.30
   6  33   0   18.58    2.99
  -7 -33   0   25.91    3.75
   7 -33   0   22.41    5.15
   7  33   0   29.71    3.83
   0 -34   0   18.24    2.49
   0 -34   0   16.35    2.35
   0 -34   0   14.39    2.09
   0 -34   0   16.16    3.20
   0 -34   0   14.61    2.07
   0 -34   0   15.75    2.31
   0  34   0   17.25    1.49
  -1 -34   0   23.03    3.16
   1 -34   0   22.88    1.75
  -1 -34   0   27.85    4.42
   1 -34   0   24.23    2.33
  -1 -34   0   25.03    2.74
  -1 -34   0   25.23    3.30
   1 -34   0   23.51    2.30
  -1 -34   0   23.39    2.96
  -1 -34   0   23.37    3.04
   1 -34   0   28.75    4.11
   1 -34   0   27.39    3.40
   1 -34   0   21.65    1.82
  -1 -34   0   23.46    3.12
   1  34   0   20.51    1.66
   2 -34   0    9.57    2.55
  -2 -34   0    9.89    3.02
   2 -34   0   10.01    1.55
  -2 -34   0   10.26    1.76
  -2 -34   0    6.16    1.89
  -2 -34   0    9.04    2.21
  -2 -34   0   10.08    2.08
  -2 -34   0    5.25    1.67
   2 -34   0   11.02    2.22
  -2 -34   0    9.29    2.15
   2  34   0    7.23    1.22
   3 -34   0    6.03    1.82
   3 -34   0   10.04    2.54
  -3 -34   0    9.46    2.44
  -3 -34   0    9.65    2.46
  -3 -34   0    8.86    1.74
  -3 -34   0   11.48    2.62
   3 -34   0    7.79    1.48
   3  34   0    7.81    1.57
  -4 -34   0    4.15    3.76
  -4 -34   0    3.60    1.36
   4 -34   0    6.30    2.34
   4 -34   0    3.87    1.52
  -4 -34   0    2.69    1.83
   4 -34   0    2.46    1.14
   4  34   0    4.09    1.22
   5 -34   0    5.18    2.31
  -5 -34   0    1.67    1.21
   5 -34   0    3.59    1.67
   5  34   0    4.12    1.42
  -6 -34   0    2.43    1.32
   6 -34   0    0.58    1.50
   6  34   0    3.64    1.43
   0 -35   0    0.69    0.68
   0 -35   0    1.43    1.18
   0 -35   0   -0.18    0.65
   0 -35   0    0.63    0.61
   0 -35   0    1.11    0.74
  -1 -35   0    1.38    0.99
   1 -35   0    0.44    0.81
   1 -35   0    0.88    0.67
  -1 -35   0    0.73    0.80
   1 -35   0    1.45    0.72
  -1 -35   0    0.10    1.23
  -1 -35   0    1.15    0.94
   1 -35   0    1.52    0.93
  -1 -35   0   -0.10    0.74
   1 -35   0    1.73    1.17
  -1 -35   0    0.66    0.73
   1  35   0    1.22    0.49
   2 -35   0    2.15    1.26
  -2 -35   0    1.99    1.28
   2 -35   0    4.13    1.70
  -2 -35   0    3.64    1.50
  -2 -35   0    5.12    1.66
  -2 -35   0    2.80    1.96
  -2 -35   0    2.56    1.30
   2 -35   0    2.81    0.90
  -2 -35   0    3.56    1.20
  -2 -35   0    3.58    2.13
   2  35   0    4.38    1.03
  -3 -35   0    7.70    2.35
  -3 -35   0    9.89    3.68
  -3 -35   0    4.32    1.90
   3 -35   0    6.65    1.43
   3 -35   0    4.64    2.01
   3 -35   0    6.96    1.84
  -3 -35   0    4.54    1.29
   3  35   0    5.92    1.28
  -4 -35   0    1.83    1.19
   4 -35   0    2.75    1.18
   4 -35   0    2.77    1.95
   4 -35   0    0.41    1.08
  -4 -35   0    0.72    1.48
   4  35   0    3.00    1.18
   5 -35   0    2.71    1.57
  -5 -35   0    1.20    1.14
   5  35   0    2.53    1.24
  -6 -35   0   13.03    2.60
   6  35   0   10.78    2.31
   0 -36   0    8.87    1.62
   0 -36   0    7.47    1.55
   0 -36   0    6.69    1.54
   0 -36   0   10.97    1.95
   0 -36   0    8.41    2.53
  -1 -36   0   14.82    2.53
  -1 -36   0   12.07    1.90
   1 -36   0   10.66    1.59
   1 -36   0   11.32    1.85
  -1 -36   0   10.38    2.05
   1 -36   0   15.03    2.67
  -1 -36   0   13.03    3.11
  -1 -36   0   10.93    2.09
   1 -36   0   13.60    2.94
   1  36   0   12.02    1.27
  -2 -36   0   10.69    3.12
   2 -36   0   10.18    1.71
  -2 -36   0   10.62    2.37
   2 -36   0    9.30    2.53
   2 -36   0    8.22    2.00
  -2 -36   0    9.22    1.76
   2  36   0   10.26    1.44
  -3 -36   0   17.96    2.56
   3 -36   0   11.43    2.45
   3 -36   0   16.96    2.32
  -3 -36   0   20.35    4.14
   3 -36   0   20.97    4.06
  -3 -36   0   16.44    3.24
   3  36   0   13.48    1.93
   4 -36   0    8.10    1.89
   4 -36   0   12.43    3.27
  -4 -36   0   11.65    2.27
  -4 -36   0    9.77    2.81
   4  36   0   13.33    2.05
  -5 -36   0    0.05    0.81
   5 -36   0    1.41    1.40
   5  36   0   -0.08    0.85
   0 -37   0   -0.15    1.05
   0 -37   0   -0.14    0.58
   0 -37   0    0.56    0.78
   1 -37   0    4.98    1.28
  -1 -37   0    7.99    1.86
  -1 -37   0    7.19    1.60
   1 -37   0    5.66    2.00
  -1 -37   0    5.95    1.66
   1 -37   0    5.04    1.88
  -1 -37   0    4.47    1.46
   1 -37   0    6.03    1.46
  -1 -37   0    5.23    2.24
   2 -37   0    1.43    1.35
  -2 -37   0    1.41    1.19
   2 -37   0    0.06    0.58
  -2 -37   0    1.39    1.01
  -2 -37   0    1.81    1.73
   2  37   0    1.03    0.61
   3 -37   0    2.51    1.65
  -3 -37   0    2.73    1.19
   3 -37   0    1.18    0.92
   3  37   0    1.64    0.81
  -4 -37   0    0.99    1.08
   4 -37   0    1.57    1.16
   4  37   0    0.19    0.83
  -5 -37   0    1.98    1.33
   5  37   0    1.83    1.10
   0 -38   0   17.13    2.40
   0 -38   0   19.42    3.74
   0 -38   0   14.42    2.35
   1 -38   0   35.28    3.19
  -1 -38   0   33.07    5.24
  -1 -38   0   38.63    4.82
  -1 -38   0   38.95    3.29
  -1 -38   0   38.84    3.70
   1 -38   0   33.00    4.83
  -2 -38   0   26.85    5.01
  -2 -38   0   32.29    3.48
   2 -38   0   31.09    2.85
   2 -38   0   28.73    4.49
  -2 -38   0   29.92    5.36
   2  38   0   30.01    2.53
   3 -38   0   13.77    2.32
  -3 -38   0   19.21    2.68
   3  38   0   17.11    2.20
  -4 -38   0    0.48    0.88
   4  38   0    0.56    0.87
   0 -39   0   -0.08    0.65
   0 -39   0    0.04    1.23
   0 -39   0    0.28    0.73
  -1 -39   0    0.64    0.91
   1 -39   0    1.42    1.40
  -1 -39   0    0.49    1.51
   1 -39   0    0.13    0.67
  -2 -39   0   -0.19    1.50
   2 -39   0    0.56    0.74
  -2 -39   0    0.77    0.94
  -3 -39   0    1.72    1.08
   3  39   0    2.85    0.99
   0 -40   0    8.70    3.18
   0 -40   0    8.00    1.93
   1 -40   0   23.46    2.97
  -1 -40   0   18.22    4.04
  -1 -40   0   23.64    3.52
  -2 -40   0   17.05    4.15
  -2 -40   0   21.87    2.98
  12   0  -1    0.73    0.92
 -12   0   1    0.17    0.80
  12   0  -1    0.04    1.06
 -11   0   1   -0.76    0.70
  11   0  -1    0.98    0.85
  11   0  -1    1.25    1.14
 -11   0   1   -0.21    0.67
  11   0  -1    0.32    0.72
  10   0  -1    0.13    0.93
 -10   0   1    0.33    0.68
  10   0  -1   -0.59    0.47
  10   0  -1    1.12    0.96
 -10   0   1    0.09    0.64
  -9   0   1    0.05    0.62
   9   0  -1    0.04    0.37
   9   0  -1   -0.58    0.72
   9   0  -1   -0.79    0.67
  -9   0   1    0.14    0.55
   9   0  -1    0.87    0.73
  -8   0   1   -0.18    1.11
   8   0  -1   -0.06    0.59
   8   0  -1   -0.47    0.87
   8   0  -1    0.28    0.49
  -8   0   1    0.63    0.63
   8   0  -1    0.29    0.76
   8   0  -1    0.16    1.63
   8   0  -1    0.29    0.95
   8   0  -1    0.83    1.63
  -8   0   1    0.84    0.75
  -8   0   1   -0.07    0.61
   8   0  -1    0.17    0.91
   8   0  -1    0.77    0.73
   8   0  -1    0.21    1.01
  -8   0   1    1.24    0.65
  -8   0   1    0.58    0.66
   7   0  -1    0.65    1.11
   7   0  -1    1.13    1.50
   7   0  -1    0.81    0.62
  -7   0   1    0.97    0.76
  -7   0   1    0.44    0.98
  -7   0   1    0.94    0.76
  -7   0   1    0.38    0.43
  -7   0   1    0.71    0.64
   7   0  -1    0.67    1.56
   7   0  -1    0.48    0.47
   7   0  -1   -0.11    0.58
   7   0  -1    0.33    0.65
   7   0  -1    0.38    0.94
   7   0  -1   -0.13    0.64
  -7   0   1    0.25    0.36
   7   0  -1    0.43    0.83
  -7   0   1   -0.64    0.54
  -7   0   1    0.71    0.46
   6   0  -1   -0.01    0.67
   6   0  -1    0.14    1.04
  -6   0   1   -0.28    0.35
  -6   0   1    0.03    0.48
  -6   0   1   -0.01    0.23
   6   0  -1    0.68    0.50
   6   0  -1   -0.49    0.69
  -6   0   1    0.21    0.54
   6   0  -1    0.08    0.53
  -6   0   1    0.66    0.94
  -6   0   1   -0.11    0.33
   6   0  -1   -0.14    0.32
  -6   0   1    0.22    0.65
   6   0  -1   -0.45    0.58
  -6   0   1    0.82    0.49
   6   0  -1   -0.63    0.64
   6   0  -1   -0.32    0.51
  -6   0   1   -0.13    0.30
   6   0  -1   -0.14    0.65
  -6   0   1    0.05    0.51
  -5   0   1    1.37    0.55
   5   0  -1    1.16    0.43
  -5   0   1    1.32    0.58
   5   0  -1    1.14    1.19
  -5   0   1    0.40    0.37
   5   0  -1    1.36    0.91
   5   0  -1    3.90    1.57
   5   0  -1    0.83    0.67
  -5   0   1    0.36    0.35
   5   0  -1    3.45    1.20
   5   0  -1    0.06    0.41
  -5   0   1    0.40    0.27
  -5   0   1    6.03    1.69
  -5   0   1    0.76    0.66
   5   0  -1    1.20    0.52
  -4   0   1    0.39    0.48
  -4   0   1   -0.16    0.18
  -4   0   1    0.10    0.30
  -4   0   1    0.06    0.27
  -4   0   1    0.00    0.20
   4   0  -1    0.04    0.47
  -4   0   1    0.20    0.27
   4   0  -1   -0.18    0.66
  -4   0   1   -0.06    0.48
  -4   0   1   -0.06    0.38
   4   0  -1    0.00    0.44
  -4   0   1   -0.02    0.60
   4   0  -1   -0.31    0.69
   4   0  -1    0.47    0.62
  -4   0   1   -0.13    0.33
   4   0  -1   -0.22    0.31
   4   0  -1    0.13    0.24
   4   0  -1   -0.19    0.33
   4   0  -1   -0.19    0.22
   4   0  -1   -0.04    0.29
  -3   0   1    0.06    0.46
  -3   0   1   -0.03    0.19
  -3   0   1    1.40    0.57
  -3   0   1   -0.26    0.20
   3   0  -1    2.31    0.96
  -3   0   1    0.37    0.34
  -3   0   1    0.72    0.36
  -3   0   1    0.32    0.25
   3   0  -1    0.35    0.41
  -3   0   1    1.17    0.75
   3   0  -1   -0.03    0.17
   3   0  -1    2.64    0.81
  -3   0   1   -0.04    0.18
  -3   0   1    0.44    0.26
   3   0  -1    0.16    0.63
   3   0  -1    0.15    0.31
  -3   0   1    1.71    0.61
   3   0  -1    0.06    0.24
   3   0  -1    0.14    0.23
  -3   0   1   -0.07    0.18
   3   0  -1   -0.01    0.19
   3   0  -1   -0.04    0.44
   3   0  -1    0.16    0.32
   2   0  -1   -0.10    0.15
   2   0  -1   -0.19    0.12
  -2   0   1    0.11    0.18
  -2   0   1    0.12    0.29
  -2   0   1   -0.08    0.18
  -2   0   1    0.09    0.22
   2   0  -1    0.17    0.22
  -2   0   1    0.27    0.20
  -2   0   1    0.41    0.27
   2   0  -1   -0.05    0.19
  -2   0   1    0.20    0.32
  -2   0   1    0.04    0.42
   2   0  -1   -0.15    0.33
   2   0  -1   -0.06    0.09
   2   0  -1    0.29    0.35
   2   0  -1   -0.33    0.44
   2   0  -1   -0.14    0.13
  -2   0   1   -0.14    0.29
  -2   0   1    0.19    0.15
  -2   0   1    0.11    0.46
   2   0  -1    0.40    0.43
  -2   0   1    0.12    0.22
   2   0  -1    0.15    0.25
   2   0  -1   -0.04    0.21
   1   0  -1    0.95    0.18
   1   0  -1    1.66    0.21
  -1   0   1    1.20    0.18
   1   0  -1    0.31    0.21
   1   0  -1    1.44    0.41
   1   0  -1    3.45    0.78
   0   0   1    0.00    0.03
   0   0   1    0.06    0.06
   0   0  -1   -0.01    0.04
   0   0  -1    0.04    0.08
   0   0  -1   -0.02    0.02
   0   0   1    0.02    0.02
   0   0   1   -0.01    0.02
   0   0   1    0.01    0.02
   0   0  -1    0.01    0.04
   0   0   1   -0.01    0.05
   0   0   1    0.01    0.05
   0   0  -1   -0.02    0.02
   0   0   1   -0.01    0.04
   0   0  -1    0.01    0.03
   0   0  -1   -0.01    0.02
   0   0  -1    0.00    0.04
   0   0   1    0.00    0.02
   0   0  -1   -0.01    0.03
   0   0  -1   -0.03    0.03
  -1   0  -1    0.31    0.15
   1   0   1    0.21    0.15
   1   0   1    0.14    0.11
  -1   0  -1    0.47    0.14
  -1   0  -1    0.48    0.15
  -1   0  -1    0.26    0.16
  -1   0  -1    0.35    0.12
   1   0   1    0.97    0.18
  -1   0  -1    0.65    0.14
  -1   0  -1    0.03    0.11
   1   0   1    0.14    0.16
  -1   0  -1    0.70    0.18
   1   0   1    0.32    0.13
   1   0   1    0.86    0.20
   1   0   1    1.07    0.19
   1   0   1    0.09    0.15
   2   0   1   -0.25    0.24
  -2   0  -1   -0.01    0.24
  -2   0  -1    0.03    0.14
   2   0   1    0.16    0.28
  -2   0  -1   -0.10    0.12
   2   0   1    0.02    0.16
  -2   0  -1    0.08    0.17
   2   0   1    0.40    0.48
   2   0   1   -0.19    0.15
   2   0   1    0.27    0.21
   2   0   1    0.58    0.26
  -2   0  -1   -0.16    0.19
  -2   0  -1    0.11    0.47
   2   0   1    0.01    0.18
  -2   0  -1    0.36    0.28
  -2   0  -1   -0.06    0.10
   2   0   1    0.24    0.33
  -2   0  -1   -0.13    0.26
  -2   0  -1    0.24    0.22
  -2   0  -1    0.18    0.33
   2   0   1    0.17    0.18
   2   0   1   -0.07    0.32
  -2   0  -1   -0.17    0.12
   2   0   1   -0.20    0.32
  -3   0  -1    0.30    0.20
  -3   0  -1    2.84    0.74
   3   0   1    0.33    0.37
  -3   0  -1    2.88    0.75
  -3   0  -1    0.57    0.35
   3   0   1    0.59    0.38
   3   0   1    0.89    0.69
   3   0   1    3.52    0.97
   3   0   1    1.75    0.74
   3   0   1    0.28    0.25
   3   0   1    0.58    0.33
   3   0   1    1.34    0.45
  -3   0  -1    0.67    0.27
   3   0   1    3.01    1.17
  -3   0  -1    3.45    1.07
  -3   0  -1    1.36    0.39
   3   0   1    1.76    0.39
  -3   0  -1    0.29    0.22
  -3   0  -1    0.30    0.32
  -4   0  -1    0.19    0.36
  -4   0  -1    0.05    0.61
  -4   0  -1    0.19    0.22
   4   0   1    0.42    0.28
   4   0   1    0.07    0.39
   4   0   1    0.20    0.38
  -4   0  -1    0.49    0.42
   4   0   1    0.39    0.66
   4   0   1    1.39    0.50
   4   0   1    0.09    0.36
   4   0   1   -0.17    0.51
  -4   0  -1    0.20    0.31
  -4   0  -1   -0.06    0.41
   4   0   1    0.16    0.31
   4   0   1    0.40    0.48
  -4   0  -1   -0.10    0.17
  -4   0  -1    0.23    0.30
  -4   0  -1    0.14    0.34
  -4   0  -1   -0.03    0.38
   4   0   1   -0.07    0.68
   4   0   1   -0.03    0.49
  -5   0  -1    0.78    0.47
   5   0   1    1.42    0.59
  -5   0  -1    1.35    0.48
   5   0   1    1.06    0.73
   5   0   1    8.71    1.84
  -5   0  -1    1.13    0.58
   5   0   1    0.71    0.56
  -5   0  -1    0.66    0.31
   5   0   1    1.57    0.68
   5   0   1    2.79    0.76
   5   0   1    2.05    1.25
   5   0   1    2.71    0.61
  -5   0  -1    1.83    0.57
   5   0   1    4.28    0.93
   5   0   1   15.02    2.95
   6   0   1    0.03    0.34
   6   0   1   -0.20    0.49
   6   0   1   -0.36    0.58
  -6   0  -1    0.12    0.26
  -6   0  -1    0.02    0.33
  -6   0  -1    0.39    0.87
  -6   0  -1    0.37    0.41
  -6   0  -1    0.37    0.29
   6   0   1   -0.03    0.48
  -6   0  -1    0.28    0.48
   6   0   1    0.24    0.96
  -6   0  -1    0.06    0.41
   6   0   1    0.28    0.45
   6   0   1   -0.16    0.69
   6   0   1   -0.44    1.00
  -6   0  -1    0.38    0.53
  -6   0  -1    0.79    0.55
   6   0   1    0.09    0.59
   6   0   1    0.21    0.56
  -6   0  -1    0.30    0.47
   7   0   1    0.88    0.52
   7   0   1    1.35    0.76
   7   0   1    0.96    0.67
  -7   0  -1    0.01    0.32
   7   0   1   -0.53    1.16
  -7   0  -1    0.26    0.41
   7   0   1    0.11    0.83
   7   0   1   10.51    3.13
  -7   0  -1    1.29    0.60
   7   0   1    0.06    0.80
  -7   0  -1    1.49    0.89
  -7   0  -1   -0.26    0.41
   7   0   1    2.10    0.95
   7   0   1    2.28    1.21
   8   0   1    1.02    1.10
   8   0   1    0.94    0.84
   8   0   1   -0.05    0.66
   8   0   1   -0.09    1.00
  -8   0  -1    0.26    0.49
   8   0   1    0.11    0.50
  -8   0  -1    0.38    0.48
   8   0   1    2.10    1.81
   8   0   1    2.49    2.23
   8   0   1    0.68    1.18
   8   0   1    1.43    1.46
  -8   0  -1    0.36    0.53
   8   0   1    0.74    0.65
   9   0   1   -0.06    0.87
  -9   0  -1   -0.23    0.55
   9   0   1   -0.49    0.72
  -9   0  -1    0.75    0.72
   9   0   1    0.50    0.71
   9   0   1    1.06    0.71
  10   0   1    0.44    0.70
 -10   0  -1   -0.04    0.65
  10   0   1    0.08    0.70
  10   0   1    0.95    0.99
 -10   0  -1   -0.32    0.61
 -11   0  -1   -0.29    0.68
  11   0   1   -0.11    1.03
  11   0   1   -1.19    0.48
  11   0   1    0.48    1.03
  12  -1  -1    7.67    1.76
 -12  -1   1    8.68    1.90
  12  -1  -1    9.70    2.43
  12   1  -1   10.76    2.11
 -12   1   1    7.64    1.83
  12   1  -1    6.74    2.07
 -11  -1   1   10.10    1.95
  11  -1  -1   14.76    2.58
  11  -1  -1   14.52    2.41
 -11  -1   1    9.48    1.77
  11  -1  -1   12.80    2.10
  11   1  -1   16.33    2.68
  11   1  -1   10.28    2.32
 -11   1   1   12.35    2.07
  11   1  -1   12.10    2.13
  10  -1  -1   12.30    2.19
  10  -1  -1    9.77    2.00
  10  -1  -1   11.66    1.86
 -10  -1   1    7.46    1.53
 -10  -1   1   11.40    1.86
 -10   1   1    9.62    1.63
  10   1  -1    9.98    2.00
  10   1  -1    9.63    1.92
 -10   1   1   10.44    1.77
  10   1  -1   11.03    1.90
   9  -1  -1   10.96    2.16
  -9  -1   1   15.50    2.07
   9  -1  -1   17.46    2.52
   9  -1  -1   11.63    2.11
  -9  -1   1   15.05    1.99
   9  -1  -1   12.45    1.84
   9   1  -1   15.37    2.32
  -9   1   1   14.68    1.97
   9   1  -1   15.97    2.06
  -9   1   1   12.14    1.73
   9   1  -1   18.76    2.74
   9   1  -1   11.73    2.10
  -8  -1   1   52.13    5.62
  -8  -1   1   50.64    3.36
   8  -1  -1   46.33    7.05
   8  -1  -1   50.32    3.63
   8  -1  -1   52.31    3.86
   8  -1  -1   41.44    5.62
   8  -1  -1   46.26    3.53
  -8  -1   1   54.50    3.66
  -8  -1   1   52.38    3.76
  -8  -1   1   48.44    3.85
   8  -1  -1   52.29    6.77
  -8  -1   1   49.46    3.30
   8  -1  -1   48.77    5.03
  -8  -1   1   48.01    4.09
   8  -1  -1   49.04    5.11
   8  -1  -1   47.49    7.94
   8  -1  -1   51.02    3.29
  -8   1   1   46.86    3.30
  -8   1   1   40.83    5.65
   8   1  -1   47.25    3.27
  -8   1   1   53.74    3.36
   8   1  -1   47.54    8.03
  -8   1   1   47.20    3.64
   8   1  -1   52.71    5.30
  -8   1   1   49.25    3.25
   8   1  -1   41.73    5.49
   8   1  -1   48.02    3.56
   8   1  -1   44.41    3.53
   8   1  -1   57.47    7.04
   8   1  -1   51.12    5.26
   8   1  -1   53.21    7.58
   8   1  -1   50.81    3.86
  -7  -1   1   88.31    4.87
   7  -1  -1   88.99    5.32
  -7  -1   1   77.94    7.03
  -7  -1   1   79.25    5.69
   7  -1  -1   85.25    4.74
  -7  -1   1   90.67    4.70
   7  -1  -1   81.88    8.31
   7  -1  -1   80.95    6.38
   7  -1  -1   87.08    5.14
  -7  -1   1   88.06    5.18
  -7  -1   1   82.39    5.60
  -7  -1   1   95.38    6.22
   7  -1  -1   75.64    7.41
  -7  -1   1   87.07    4.79
   7  -1  -1   86.88    6.99
   7  -1  -1   83.47    6.68
   7  -1  -1   81.12    5.04
  -7  -1   1   86.22    4.83
  -7   1   1   94.16    4.71
  -7   1   1   84.28    5.06
  -7   1   1   89.15    6.98
  -7   1   1   94.01    5.00
   7   1  -1   77.76    8.17
   7   1  -1   91.49    5.20
  -7   1   1   88.12    4.79
  -7   1   1   87.44    4.79
  -7   1   1   98.73    5.94
  -7   1   1   84.84    5.38
   7   1  -1   83.77    4.76
   7   1  -1   77.37    4.97
   7   1  -1   79.73    7.60
   7   1  -1   72.64    6.68
   7   1  -1   68.93    6.25
   7   1  -1   88.87    5.33
   7   1  -1   85.00    6.58
   7   1  -1   82.64    6.55
  -6  -1   1   15.05    2.54
  -6  -1   1   16.80    1.48
  -6  -1   1   17.24    2.47
  -6  -1   1   17.50    1.45
   6  -1  -1   15.38    2.81
  -6  -1   1   17.04    1.60
  -6  -1   1   16.11    3.20
  -6  -1   1   17.37    1.98
   6  -1  -1   14.50    2.77
   6  -1  -1   16.53    1.96
   6  -1  -1   16.34    1.91
   6  -1  -1   15.95    1.87
  -6  -1   1   18.37    2.61
   6  -1  -1   14.16    3.52
  -6  -1   1   18.62    2.03
  -6  -1   1   15.60    1.49
   6  -1  -1   16.12    1.42
   6  -1  -1   18.61    2.81
   6  -1  -1   12.33    3.05
  -6   1   1   21.19    2.14
  -6   1   1   14.08    1.60
  -6   1   1   18.49    2.58
   6   1  -1   11.90    2.48
  -6   1   1   17.57    1.84
  -6   1   1   15.39    1.26
  -6   1   1   17.57    1.86
  -6   1   1   15.42    1.42
   6   1  -1   13.48    2.58
   6   1  -1   18.19    4.10
   6   1  -1   16.02    1.96
   6   1  -1   15.72    1.88
   6   1  -1   13.47    1.57
  -6   1   1   17.84    1.46
   6   1  -1   17.26    3.09
  -6   1   1   21.10    3.49
   6   1  -1   18.70    3.76
   6   1  -1   15.59    1.82
  -6   1   1   19.19    2.33
   5  -1  -1   30.46    3.07
   5  -1  -1   25.88    2.62
  -5  -1   1   25.50    2.12
  -5  -1   1   27.57    3.99
   5  -1  -1   31.33    2.13
   5  -1  -1   27.58    1.88
  -5  -1   1   30.36    3.01
  -5  -1   1   33.25    2.06
   5  -1  -1   28.31    2.17
  -5  -1   1   29.81    2.16
  -5  -1   1   25.78    2.61
  -5  -1   1   29.14    2.19
  -5  -1   1   26.25    2.62
   5  -1  -1   23.54    3.20
   5  -1  -1   27.01    2.07
  -5  -1   1   30.62    1.96
   5  -1  -1   29.56    4.19
  -5  -1   1   29.41    2.00
   5  -1  -1   26.36    2.88
   5  -1  -1   28.91    4.51
  -5   1   1   30.91    2.82
  -5   1   1   31.07    2.02
   5   1  -1   30.81    2.22
   5   1  -1   26.32    1.88
   5   1  -1   29.60    3.04
   5   1  -1   28.89    2.12
  -5   1   1   31.16    2.19
  -5   1   1   24.13    3.48
   5   1  -1   28.90    2.86
  -5   1   1   26.71    1.88
   5   1  -1   26.88    2.05
  -5   1   1   30.23    1.93
  -5   1   1   28.41    2.38
  -5   1   1   26.31    2.39
  -5   1   1   29.67    1.83
   5   1  -1   26.45    4.30
   5   1  -1   26.43    3.46
  -5   1   1   30.74    2.12
   5   1  -1   25.91    4.02
  -4  -1   1    2.07    0.51
  -4  -1   1    2.49    0.60
   4  -1  -1    7.22    1.43
  -4  -1   1    7.88    1.43
   4  -1  -1    1.66    0.42
   4  -1  -1    3.07    0.69
  -4  -1   1    6.45    1.69
   4  -1  -1    1.17    0.65
   4  -1  -1    7.78    1.52
  -4  -1   1    1.86    0.96
   4  -1  -1    2.19    0.59
   4  -1  -1    3.58    0.72
  -4  -1   1    1.59    0.58
   4  -1  -1    1.64    1.06
  -4  -1   1    1.58    0.48
   4  -1  -1    6.82    1.78
  -4  -1   1    2.07    0.53
   4  -1  -1    0.91    0.70
  -4  -1   1    0.90    0.46
   4   1  -1   10.32    1.80
  -4   1   1    1.41    0.39
  -4   1   1    1.48    0.52
  -4   1   1    1.58    0.48
  -4   1   1    1.93    0.48
   4   1  -1    2.09    0.61
   4   1  -1    1.33    1.13
   4   1  -1    1.10    0.73
  -4   1   1    2.85    0.63
   4   1  -1    8.93    2.04
  -4   1   1    2.16    0.57
   4   1  -1    2.79    0.65
   4   1  -1    2.85    0.65
  -4   1   1    1.50    0.46
  -4   1   1    1.58    0.81
  -4   1   1    5.67    1.03
   4   1  -1    1.85    0.47
   4   1  -1    2.64    0.93
   3  -1  -1   -0.27    0.34
  -3  -1   1    0.01    0.31
  -3  -1   1    0.07    0.20
  -3  -1   1    0.02    0.27
   3  -1  -1    1.07    0.59
   3  -1  -1    0.61    0.68
   3  -1  -1   -0.16    0.64
   3  -1  -1    0.02    0.21
  -3  -1   1    0.28    0.60
   3  -1  -1   -0.02    0.17
  -3  -1   1    1.17    0.57
  -3  -1   1   -0.09    0.23
   3  -1  -1    0.17    0.29
   3  -1  -1   -0.24    0.37
   3  -1  -1    0.40    0.31
  -3  -1   1    0.09    0.16
  -3  -1   1    0.07    0.18
  -3  -1   1    0.57    0.50
   3  -1  -1   -0.01    0.25
  -3  -1   1    0.22    0.64
  -3  -1   1   -0.13    0.29
   3  -1  -1    0.01    0.33
  -3  -1   1    0.04    0.23
  -3   1   1    0.04    0.16
  -3   1   1    0.08    0.22
  -3   1   1    0.27    0.31
  -3   1   1   -0.03    0.20
  -3   1   1   -0.06    0.27
   3   1  -1    0.33    0.54
  -3   1   1   -0.22    0.35
  -3   1   1   -0.09    0.16
  -3   1   1    0.45    0.33
   3   1  -1   -0.15    0.28
   3   1  -1   -0.17    0.33
   3   1  -1    0.39    0.22
   3   1  -1    0.16    0.30
  -3   1   1    0.87    0.44
  -3   1   1    0.45    0.24
   3   1  -1    0.10    0.20
   3   1  -1   -0.15    0.55
  -3   1   1    0.68    0.44
   3   1  -1   -0.02    0.46
  -3   1   1   -0.16    0.22
   3   1  -1    0.36    0.34
  -3   1   1    0.38    0.57
   3   1  -1    0.14    0.30
   2  -1  -1  132.08    6.94
   2  -1  -1  142.15    6.51
   2  -1  -1  150.34    6.47
  -2  -1   1  143.24    6.56
   2  -1  -1  136.26    6.84
  -2  -1   1  144.12    6.50
   2  -1  -1  146.86    6.45
  -2  -1   1  141.53    7.11
   2  -1  -1  140.10    6.60
  -2  -1   1  145.94    6.47
   2  -1  -1  130.55    7.62
  -2  -1   1  137.31    6.87
  -2  -1   1  144.98    7.14
   2  -1  -1  138.23    7.40
  -2  -1   1  140.80    7.54
   2  -1  -1  142.52    7.00
  -2  -1   1  142.89    6.47
  -2  -1   1  151.23    6.56
   2  -1  -1  127.96    6.99
  -2  -1   1  140.53    6.53
   2  -1  -1  133.15    6.53
  -2  -1   1  141.38    7.09
  -2  -1   1  131.19    7.57
   2  -1  -1  149.08    6.49
   2   1  -1  146.23    6.49
   2   1  -1  128.63    7.72
  -2   1   1  144.93    6.54
  -2   1   1  149.84    7.36
  -2   1   1  145.85    6.85
   2   1  -1  138.43    7.12
  -2   1   1  139.52    7.40
  -2   1   1  145.32    6.48
   2   1  -1  126.30    6.99
   2   1  -1  157.32    6.53
  -2   1   1  136.62    6.75
  -2   1   1  141.42    6.58
   2   1  -1  150.16    6.58
  -2   1   1  144.57    6.46
   2   1  -1  144.78    6.54
  -2   1   1  139.84    6.56
   2   1  -1  142.31    6.46
   2   1  -1  131.88    7.18
  -2   1   1  148.93    6.51
   2   1  -1  138.24    6.55
  -2   1   1  141.93    6.58
  -2   1   1  145.24    6.84
  -2   1   1  134.44    6.44
   1  -1  -1   58.74    2.64
  -1  -1   1   57.82    2.67
  -1  -1   1   60.12    2.65
  -1  -1   1   53.01    2.94
   1  -1  -1   57.29    2.67
   1  -1  -1   57.73    2.73
  -1  -1   1   54.77    3.17
   1  -1  -1   57.83    2.61
   1  -1  -1   57.00    2.65
  -1  -1   1   54.20    2.96
  -1  -1   1   60.02    2.68
   1  -1  -1   50.68    2.96
   1  -1  -1   49.46    3.28
  -1  -1   1   62.19    2.64
  -1  -1   1   57.95    2.63
   1  -1  -1   54.06    2.90
   1  -1  -1   58.86    2.63
  -1  -1   1   56.72    2.65
   1   1  -1   58.07    2.63
  -1   1   1   54.58    2.62
   1   1  -1   58.30    2.83
   1   1  -1   49.69    3.33
  -1   1   1   58.36    2.72
  -1   1   1   59.51    2.65
   1   1  -1   50.05    2.61
   1   1  -1   59.51    2.68
   1   1  -1   50.46    2.64
   1   1  -1   52.33    2.97
   1   1  -1   60.66    2.65
  -1   1   1   55.74    2.77
  -1   1   1   58.51    2.68
  -1   1   1   56.60    2.78
   1   1  -1   55.43    3.06
  -1   1   1   57.30    3.01
   1  -1   1   98.30    4.40
   1  -1   1  102.30    4.38
   1  -1   1  101.86    4.39
  -1  -1  -1   98.23    4.47
   1  -1   1   95.06    4.38
  -1  -1  -1  100.33    4.53
  -1  -1  -1  103.56    4.50
  -1  -1  -1   95.08    5.06
   1  -1   1   99.47    4.49
   1  -1   1   87.77    4.56
   1  -1   1  101.76    4.42
   1  -1   1   94.83    4.41
  -1  -1  -1   86.70    4.74
   1  -1   1   90.48    4.86
  -1  -1  -1   88.15    4.73
   1  -1   1  100.69    4.39
  -1  -1  -1  102.19    4.43
  -1  -1  -1  103.66    4.45
  -1  -1  -1   96.24    4.45
   1  -1   1   85.83    4.49
  -1  -1  -1  101.31    4.45
   1  -1   1   96.32    4.37
  -1  -1  -1  104.52    4.64
  -1  -1  -1   95.34    4.43
  -1   1  -1   96.88    4.38
   1   1   1  101.02    4.49
   1   1   1   99.57    4.45
  -1   1  -1   97.81    4.37
  -1   1  -1  103.31    4.40
   1   1   1   99.08    4.45
   1   1   1  100.10    4.42
   1   1   1   99.80    4.47
  -1   1  -1  101.72    4.39
  -1   1  -1   96.33    4.46
  -1   1  -1   92.89    4.34
  -1   1  -1   88.78    4.41
  -1   1  -1   88.89    4.78
   1   1   1   97.91    4.51
   1   1   1   94.33    4.43
   1   1   1   99.36    4.55
  -1   1  -1   96.36    4.42
   1   1   1   99.52    4.69
   2  -1   1  216.99   10.39
  -2  -1  -1  227.64   10.44
  -2  -1  -1  226.58   10.50
  -2  -1  -1  233.13   10.44
  -2  -1  -1  229.40   10.58
  -2  -1  -1  224.92   10.45
  -2  -1  -1  231.51   10.42
   2  -1   1  221.31   10.51
  -2  -1  -1  237.46   10.51
   2  -1   1  232.16   10.90
   2  -1   1  228.43   10.48
   2  -1   1  240.17   10.48
  -2  -1  -1  235.83   10.85
   2  -1   1  241.07   10.40
  -2  -1  -1  244.94   10.54
   2  -1   1  239.75   10.43
   2  -1   1  234.29   10.40
   2  -1   1  223.14   10.46
  -2   1  -1  216.10   10.37
  -2   1  -1  237.60   10.39
   2   1   1  232.13   11.17
  -2   1  -1  243.23   10.41
   2   1   1  244.61   10.44
   2   1   1  234.84   10.71
   2   1   1  232.27   10.44
  -2   1  -1  233.05   10.50
   2   1   1  243.86   10.50
   2   1   1  245.69   10.54
   2   1   1  224.76   10.55
  -2   1  -1  229.55   10.35
  -2   1  -1  219.91   10.39
   2   1   1  223.54   10.60
  -2   1  -1  240.26   10.45
   2   1   1  230.89   10.49
  -2   1  -1  231.42   10.33
  -2   1  -1  238.58   10.61
   3  -1   1   51.61    2.92
   3  -1   1   50.04    3.49
   3  -1   1   51.41    3.54
  -3  -1  -1   56.33    2.80
  -3  -1  -1   56.59    2.82
   3  -1   1   52.56    2.98
  -3  -1  -1   55.32    2.81
  -3  -1  -1   53.39    3.53
   3  -1   1   51.31    3.01
  -3  -1  -1   49.85    3.42
  -3  -1  -1   51.63    4.06
   3  -1   1   55.91    2.89
  -3  -1  -1   54.95    2.99
  -3  -1  -1   49.92    2.78
   3  -1   1   50.56    3.62
  -3  -1  -1   50.32    2.83
   3  -1   1   52.85    2.87
   3  -1   1   53.14    4.09
  -3  -1  -1   52.33    2.89
   3  -1   1   51.84    2.75
   3  -1   1   57.16    2.84
  -3  -1  -1   58.31    3.36
   3  -1   1   48.54    2.83
   3   1   1   52.38    2.90
  -3   1  -1   54.59    3.08
   3   1   1   53.54    3.04
   3   1   1   51.34    2.77
   3   1   1   50.87    2.86
  -3   1  -1   54.77    2.77
  -3   1  -1   53.92    2.71
  -3   1  -1   55.12    2.76
  -3   1  -1   54.39    2.83
   3   1   1   60.30    4.36
   3   1   1   53.76    3.26
   3   1   1   50.41    3.02
   3   1   1   55.21    3.69
  -3   1  -1   53.05    2.90
  -3   1  -1   52.73    2.75
  -3   1  -1   54.26    3.20
  -3   1  -1   49.67    3.77
  -3   1  -1   54.65    3.08
  -3   1  -1   54.42    2.67
   3   1   1   55.74    3.92
  -3   1  -1   55.58    2.82
   4  -1   1  309.04   13.64
   4  -1   1  292.10   13.62
   4  -1   1  302.70   13.80
  -4  -1  -1  279.68   14.37
  -4  -1  -1  330.16   14.35
  -4  -1  -1  307.51   13.68
   4  -1   1  287.45   15.65
   4  -1   1  304.70   14.18
   4  -1   1  288.82   13.69
   4  -1   1  294.53   15.31
   4  -1   1  298.08   13.45
  -4  -1  -1  290.20   13.44
  -4  -1  -1  304.42   13.73
  -4  -1  -1  293.72   13.49
   4  -1   1  264.40   14.58
  -4  -1  -1  276.73   14.43
   4  -1   1  304.03   13.82
  -4  -1  -1  272.29   15.38
  -4  -1  -1  303.91   13.47
  -4  -1  -1  294.18   13.54
   4  -1   1  277.39   14.71
  -4   1  -1  299.22   13.44
  -4   1  -1  288.54   13.41
   4   1   1  294.11   13.82
  -4   1  -1  279.96   14.00
  -4   1  -1  311.84   13.39
   4   1   1  302.95   13.66
   4   1   1  289.23   13.46
   4   1   1  297.24   13.63
  -4   1  -1  324.14   14.02
  -4   1  -1  279.01   13.79
   4   1   1  279.70   15.67
  -4   1  -1  305.91   13.31
   4   1   1  290.83   15.47
  -4   1  -1  295.34   13.49
   4   1   1  321.93   14.15
  -4   1  -1  267.18   14.99
   4   1   1  285.85   14.36
   4   1   1  282.61   14.81
  -4   1  -1  306.65   13.68
   4   1   1  300.74   13.71
   5  -1   1  147.54    7.62
   5  -1   1  159.92    8.03
  -5  -1  -1  160.76    8.18
  -5  -1  -1  148.84    8.38
   5  -1   1  151.87    7.32
  -5  -1  -1  150.24    7.37
  -5  -1  -1  143.71    9.46
  -5  -1  -1  144.71    8.21
  -5  -1  -1  144.63    7.28
  -5  -1  -1  151.82    7.58
  -5  -1  -1  157.67    7.39
  -5  -1  -1  154.02    7.28
   5  -1   1  140.18    8.80
   5  -1   1  148.60    7.50
   5  -1   1  152.57    7.74
   5  -1   1  129.48    8.58
   5  -1   1  150.92    8.40
   5  -1   1  136.34    9.62
   5  -1   1  144.77    9.61
   5  -1   1  158.09    7.58
  -5  -1  -1  150.19    7.57
  -5   1  -1  149.22    7.28
   5   1   1  154.21    9.93
  -5   1  -1  158.67    7.12
  -5   1  -1  161.60    7.63
  -5   1  -1  151.31    7.64
   5   1   1  137.64    8.77
   5   1   1  146.13    7.32
   5   1   1  148.26    8.59
  -5   1  -1  162.79    7.39
   5   1   1  144.14    9.83
   5   1   1  148.85    7.53
  -5   1  -1  166.99    7.96
   5   1   1  154.22    7.64
  -5   1  -1  138.57    9.05
   5   1   1  151.00    8.19
   5   1   1  149.16    7.53
  -5   1  -1  139.80    7.25
  -5   1  -1  152.92    7.19
  -5   1  -1  144.79    7.86
   5   1   1  157.24    7.79
   6  -1   1   49.17    2.86
  -6  -1  -1   50.98    3.19
   6  -1   1   43.27    3.56
   6  -1   1   36.62    5.40
   6  -1   1   43.31    3.11
   6  -1   1   46.73    4.07
  -6  -1  -1   45.10    3.65
  -6  -1  -1   44.44    3.42
  -6  -1  -1   47.36    3.05
   6  -1   1   48.52    3.29
  -6  -1  -1   46.45    2.81
  -6  -1  -1   45.73    2.83
  -6  -1  -1   44.54    2.70
  -6  -1  -1   42.60    3.44
  -6  -1  -1   39.83    2.74
   6  -1   1   35.79    3.93
   6  -1   1   46.72    6.06
  -6  -1  -1   49.44    4.89
   6  -1   1   44.65    3.01
   6  -1   1   41.52    2.98
   6  -1   1   36.82    3.90
  -6   1  -1   48.14    3.31
  -6   1  -1   46.41    2.65
  -6   1  -1   49.44    2.56
   6   1   1   41.33    2.95
   6   1   1   49.29    4.29
  -6   1  -1   45.91    2.80
   6   1   1   43.42    5.80
   6   1   1   40.77    4.00
  -6   1  -1   40.84    2.71
   6   1   1   44.85    2.83
  -6   1  -1   43.58    4.36
  -6   1  -1   45.11    2.79
   6   1   1   42.51    4.17
  -6   1  -1   43.93    3.21
  -6   1  -1   53.84    3.25
   6   1   1   40.77    5.93
  -6   1  -1   40.79    2.82
   6   1   1   40.85    2.97
   6   1   1   45.75    3.80
   6   1   1   46.60    3.17
   7  -1   1   29.52    2.23
  -7  -1  -1   29.35    2.74
   7  -1   1   29.71    3.79
  -7  -1  -1   30.23    2.69
   7  -1   1   28.55    4.19
  -7  -1  -1   25.07    2.14
   7  -1   1   26.78    2.42
   7  -1   1   28.06    2.43
  -7  -1  -1   33.23    2.22
   7  -1   1   26.57    5.15
  -7  -1  -1   28.66    4.67
  -7  -1  -1   28.47    2.86
   7  -1   1   28.33    4.19
  -7  -1  -1   27.32    2.17
   7  -1   1   29.22    4.19
  -7  -1  -1   30.46    2.37
   7  -1   1   29.80    5.13
   7  -1   1   31.57    2.65
  -7   1  -1   27.38    2.16
   7   1   1   25.44    3.88
  -7   1  -1   29.45    2.16
   7   1   1   27.17    2.43
   7   1   1   27.17    4.94
   7   1   1   29.93    4.35
   7   1   1   26.27    5.22
  -7   1  -1   28.76    2.10
   7   1   1   27.37    2.52
   7   1   1   32.18    2.50
   7   1   1   30.86    2.25
  -7   1  -1   26.57    2.39
  -7   1  -1   27.83    4.27
   7   1   1   28.22    3.84
  -7   1  -1   27.49    1.97
   8  -1   1   18.18    4.84
   8  -1   1   21.42    4.91
  -8  -1  -1   17.49    2.01
   8  -1   1   22.92    1.95
   8  -1   1   22.83    4.19
   8  -1   1   20.53    2.67
  -8  -1  -1   17.32    2.49
   8  -1   1   22.49    2.57
  -8  -1  -1   20.11    2.17
   8  -1   1   11.56    2.90
  -8  -1  -1   16.81    2.06
   8  -1   1   20.28    3.57
   8  -1   1   23.52    4.14
   8  -1   1   18.78    2.42
  -8  -1  -1   22.38    5.08
  -8   1  -1   18.93    2.14
   8   1   1   18.78    2.54
   8   1   1   18.72    2.47
   8   1   1   21.75    3.77
   8   1   1   18.20    3.85
   8   1   1   19.56    2.45
   8   1   1   18.86    2.19
  -8   1  -1   19.10    1.64
   8   1   1   18.96    3.52
   8   1   1   19.40    4.99
   8   1   1   23.38    5.08
  -8   1  -1   21.67    1.86
   9  -1   1   16.03    2.45
  -9  -1  -1   17.83    2.17
   9  -1   1   14.26    2.16
   9  -1   1   15.11    2.46
   9  -1   1   11.17    1.81
  -9  -1  -1   11.35    1.77
  -9   1  -1   15.75    1.97
  -9   1  -1   14.88    1.97
   9   1   1   11.81    2.10
   9   1   1   13.71    1.98
   9   1   1   15.65    2.27
   9   1   1   12.92    2.32
  10  -1   1    0.50    0.66
 -10  -1  -1    0.07    0.62
  10  -1   1    0.71    0.84
  10  -1   1   -0.18    0.77
 -10  -1  -1    0.65    0.77
 -10   1  -1    0.48    0.72
 -10   1  -1   -0.29    0.60
  10   1   1    0.89    0.78
  10   1   1    0.17    0.66
  10   1   1    1.67    1.20
  11  -1   1   -0.56    0.67
  11  -1   1    1.33    1.14
  11  -1   1    2.12    1.48
 -11  -1  -1    0.71    0.84
 -11   1  -1    1.13    0.94
  11   1   1   -1.40    0.53
  11   1   1    0.53    1.01
  11   1   1   -0.65    0.80
  12  -2  -1    3.12    1.51
  12  -2  -1    3.17    1.30
 -12  -2   1    3.61    1.30
  12   2  -1    1.79    1.14
 -12   2   1    3.45    1.29
  12   2  -1    3.41    1.68
 -11  -2   1   -0.06    0.80
 -11  -2   1    1.96    1.00
  11  -2  -1    1.51    1.21
  11  -2  -1    0.22    0.69
  11  -2  -1    1.86    0.98
  11   2  -1    1.64    1.11
 -11   2   1    0.71    0.85
  11   2  -1    0.55    0.77
  11   2  -1    1.25    1.01
  10  -2  -1   -0.34    0.77
  10  -2  -1    0.81    0.75
 -10  -2   1    0.00    0.70
  10  -2  -1    1.96    1.02
 -10  -2   1    0.72    0.84
  10   2  -1    0.01    0.81
  10   2  -1    1.90    0.95
 -10   2   1    1.02    0.84
 -10   2   1   -0.03    0.64
  10   2  -1    0.51    0.67
   9  -2  -1    0.89    0.63
  -9  -2   1    1.35    1.05
   9  -2  -1    0.18    0.79
   9  -2  -1    1.60    0.93
  -9  -2   1   -0.25    0.60
   9  -2  -1   -0.10    1.21
  -9  -2   1    0.16    0.62
   9  -2  -1   -0.54    0.77
   9   2  -1    0.33    0.88
  -9   2   1    0.58    0.59
   9   2  -1    2.15    1.09
   9   2  -1    0.57    0.76
   9   2  -1    0.77    0.68
  -9   2   1    0.81    0.71
  -8  -2   1    7.58    1.29
   8  -2  -1    9.72    1.40
   8  -2  -1    6.06    2.25
  -8  -2   1    8.77    2.06
  -8  -2   1    7.79    1.96
   8  -2  -1    4.66    1.41
   8  -2  -1    8.37    2.58
   8  -2  -1    5.69    2.93
   8  -2  -1    8.35    3.08
   8  -2  -1   11.80    3.20
  -8  -2   1    6.67    1.66
   8  -2  -1    5.51    2.06
  -8  -2   1    9.23    1.44
  -8  -2   1    8.59    2.78
  -8  -2   1    6.76    1.30
   8  -2  -1   10.66    1.75
  -8  -2   1    8.84    1.65
   8  -2  -1   10.72    1.76
   8   2  -1    7.24    2.66
   8   2  -1    9.54    1.66
   8   2  -1    5.51    2.11
  -8   2   1    7.56    1.68
   8   2  -1    6.39    2.22
  -8   2   1    6.87    1.17
   8   2  -1   10.04    1.83
  -8   2   1    6.07    1.13
  -8   2   1    8.50    1.36
   8   2  -1    8.37    1.34
   8   2  -1    5.75    3.04
   8   2  -1    9.29    1.65
   8   2  -1    9.44    2.53
  -7  -2   1    1.87    0.93
   7  -2  -1    1.77    1.38
  -7  -2   1    2.31    0.73
  -7  -2   1    3.52    1.27
   7  -2  -1    3.30    2.13
   7  -2  -1    1.17    1.51
   7  -2  -1    3.02    1.39
  -7  -2   1    1.17    0.85
   7  -2  -1    1.83    0.91
  -7  -2   1    2.26    0.69
  -7  -2   1    2.33    0.74
   7  -2  -1    3.62    1.01
   7  -2  -1    1.24    0.58
   7  -2  -1    1.70    1.03
  -7  -2   1    2.81    1.71
  -7  -2   1    1.66    0.70
   7  -2  -1    1.11    1.02
   7  -2  -1    2.45    0.91
  -7  -2   1    2.14    1.16
  -7   2   1    2.71    0.60
   7   2  -1    3.01    1.07
   7   2  -1    3.83    1.55
   7   2  -1    2.77    0.94
  -7   2   1    2.93    0.79
   7   2  -1    0.07    0.93
   7   2  -1    1.45    1.42
  -7   2   1    2.57    1.39
   7   2  -1    0.47    1.02
   7   2  -1    0.26    1.62
  -7   2   1    2.56    0.85
  -7   2   1    2.80    1.02
  -7   2   1    1.98    0.70
  -7   2   1    2.54    0.78
   7   2  -1    2.12    0.78
   7   2  -1    0.90    1.17
   7   2  -1    2.30    0.73
  -7   2   1    2.91    0.69
  -6  -2   1   20.57    1.64
  -6  -2   1   17.39    1.71
   6  -2  -1   11.43    3.17
  -6  -2   1   17.83    3.51
   6  -2  -1   18.87    1.51
   6  -2  -1   15.94    2.84
  -6  -2   1   20.18    2.22
  -6  -2   1   16.18    2.57
   6  -2  -1   14.90    1.86
   6  -2  -1   18.44    3.62
  -6  -2   1   21.09    3.06
   6  -2  -1   15.76    2.81
  -6  -2   1   17.38    1.53
  -6  -2   1   21.28    2.19
   6  -2  -1   16.70    2.59
  -6  -2   1   17.52    2.72
   6  -2  -1   19.09    2.15
   6  -2  -1   17.63    3.05
  -6  -2   1   16.39    1.79
   6  -2  -1   17.98    1.99
  -6   2   1   18.95    1.29
  -6   2   1   17.60    2.00
  -6   2   1   16.49    1.60
   6   2  -1   15.65    3.76
  -6   2   1   17.72    1.39
  -6   2   1   20.47    2.21
   6   2  -1   17.05    1.74
  -6   2   1   17.77    1.84
  -6   2   1   14.34    2.80
   6   2  -1   17.02    2.93
   6   2  -1   17.13    1.92
  -6   2   1   19.31    1.65
   6   2  -1   22.12    3.58
   6   2  -1   15.20    2.72
  -6   2   1   13.98    1.38
   6   2  -1   17.25    2.96
   6   2  -1   19.22    2.03
   6   2  -1   17.83    2.06
  -6   2   1   15.70    1.42
  -5  -2   1   59.88    4.63
   5  -2  -1   71.48    5.07
  -5  -2   1   71.10    4.00
   5  -2  -1   66.15    3.84
   5  -2  -1   60.08    4.81
   5  -2  -1   72.91    4.07
   5  -2  -1   69.74    3.68
   5  -2  -1   67.22    4.59
  -5  -2   1   73.59    3.93
   5  -2  -1   61.50    4.86
  -5  -2   1   59.26    5.43
  -5  -2   1   64.73    3.68
  -5  -2   1   66.35    3.77
  -5  -2   1   75.17    4.24
   5  -2  -1   62.23    5.88
   5  -2  -1   67.22    5.74
  -5  -2   1   69.03    5.14
   5  -2  -1   70.47    3.95
  -5  -2   1   67.64    4.82
  -5  -2   1   71.94    4.13
  -5   2   1   67.44    3.68
   5   2  -1   67.96    3.89
   5   2  -1   67.73    3.92
   5   2  -1   62.44    4.94
  -5   2   1   77.33    4.72
   5   2  -1   66.14    4.87
  -5   2   1   68.71    3.69
   5   2  -1   62.19    4.90
   5   2  -1   70.36    4.00
  -5   2   1   70.57    4.02
  -5   2   1   71.12    3.50
  -5   2   1   66.91    4.15
  -5   2   1   59.28    4.95
  -5   2   1   74.10    3.87
   5   2  -1   74.14    3.76
  -5   2   1   70.87    3.67
   5   2  -1   59.93    5.92
  -5   2   1   72.36    3.99
   5   2  -1   64.19    5.13
   4  -2  -1   24.82    3.61
   4  -2  -1   31.40    2.71
  -4  -2   1   32.77    1.96
  -4  -2   1   32.01    2.13
   4  -2  -1   26.93    1.96
  -4  -2   1   29.20    2.98
   4  -2  -1   27.95    1.92
  -4  -2   1   27.97    2.62
  -4  -2   1   28.21    3.15
  -4  -2   1   30.75    1.86
  -4  -2   1   31.58    2.18
   4  -2  -1   24.85    2.52
  -4  -2   1   31.86    2.37
   4  -2  -1   29.89    2.69
   4  -2  -1   27.87    3.11
   4  -2  -1   30.55    1.83
   4  -2  -1   31.12    2.43
  -4  -2   1   26.45    2.59
  -4  -2   1   30.43    2.04
   4  -2  -1   27.95    2.03
   4   2  -1   28.97    2.86
  -4   2   1   26.03    2.72
  -4   2   1   29.35    2.04
   4   2  -1   26.86    1.95
  -4   2   1   30.56    2.58
  -4   2   1   28.85    2.19
   4   2  -1   25.86    3.90
   4   2  -1   29.00    1.97
  -4   2   1   29.97    1.72
  -4   2   1   29.96    2.12
  -4   2   1   30.02    1.84
  -4   2   1   33.49    1.91
   4   2  -1   25.94    2.66
   4   2  -1   31.05    1.87
  -4   2   1   32.41    2.07
  -4   2   1   31.33    1.97
   4   2  -1   28.36    2.64
  -4   2   1   31.53    1.89
   4   2  -1   31.42    2.05
   4   2  -1   30.52    2.79
  -4   2   1   31.95    1.87
   3  -2  -1    5.76    0.95
  -3  -2   1    5.18    1.39
   3  -2  -1    9.24    0.79
   3  -2  -1    6.42    0.85
  -3  -2   1    5.11    0.70
  -3  -2   1    7.47    0.84
  -3  -2   1    7.25    0.87
  -3  -2   1    6.49    0.75
  -3  -2   1    5.90    0.70
   3  -2  -1    5.77    0.74
  -3  -2   1    5.08    0.88
  -3  -2   1    5.36    0.82
  -3  -2   1   14.90    2.18
   3  -2  -1    4.73    0.63
  -3  -2   1    4.65    0.99
   3  -2  -1    4.89    1.02
   3  -2  -1   15.72    2.13
   3  -2  -1    5.63    1.51
   3  -2  -1    5.15    0.77
   3   2  -1    4.65    1.18
   3   2  -1    5.76    0.69
  -3   2   1    8.02    0.84
  -3   2   1    7.63    0.77
   3   2  -1    6.63    0.84
   3   2  -1    8.74    0.94
  -3   2   1    5.11    1.09
  -3   2   1    5.27    0.66
   3   2  -1    4.95    1.10
  -3   2   1    7.01    0.87
  -3   2   1    6.50    0.77
  -3   2   1    4.99    0.51
  -3   2   1    8.07    0.68
   3   2  -1    7.39    0.86
  -3   2   1    5.40    0.71
   3   2  -1    6.50    1.69
  -3   2   1    6.24    0.79
  -2  -2   1    0.09    0.15
   2  -2  -1    0.28    0.56
  -2  -2   1    0.11    0.21
  -2  -2   1   -0.35    0.29
  -2  -2   1    0.02    0.36
   2  -2  -1    0.27    0.26
   2  -2  -1    0.14    0.30
  -2  -2   1    0.44    0.38
  -2  -2   1    0.19    0.19
  -2  -2   1   -0.04    0.20
   2  -2  -1    0.64    0.28
   2  -2  -1    0.33    0.19
  -2  -2   1    0.21    0.40
   2  -2  -1    0.03    0.26
  -2  -2   1    0.04    0.26
   2  -2  -1    0.12    0.16
   2  -2  -1    0.48    0.32
  -2  -2   1    0.30    0.21
   2  -2  -1    0.45    0.26
   2  -2  -1    0.05    0.17
  -2  -2   1    0.14    0.36
  -2  -2   1    1.11    0.61
   2  -2  -1    0.44    0.31
   2  -2  -1    0.58    0.44
   2   2  -1    0.29    0.20
   2   2  -1    0.28    0.39
  -2   2   1    0.17    0.13
  -2   2   1   -0.05    0.17
  -2   2   1    0.41    0.25
   2   2  -1    0.27    0.59
  -2   2   1   -0.03    0.15
   2   2  -1    0.14    0.19
   2   2  -1    0.19    0.26
  -2   2   1    0.26    0.24
  -2   2   1    0.32    0.28
   2   2  -1   -0.14    0.41
   2   2  -1    0.46    0.26
   2   2  -1    0.98    0.60
  -2   2   1    0.16    0.24
  -2   2   1   -0.02    0.16
  -2   2   1    0.20    0.20
  -2   2   1    0.18    0.36
  -2   2   1   -0.36    0.32
  -2   2   1   -0.09    0.15
   2   2  -1    0.45    0.39
   2   2  -1    0.54    0.24
   2   2  -1    0.02    0.12
  -2   2   1    0.29    0.20
   2   2  -1    0.48    0.42
  -1  -2   1  166.43    8.28
   1  -2  -1  181.91    7.92
  -1  -2   1  160.15    8.73
   1  -2  -1  165.25    8.18
  -1  -2   1  175.16    8.25
  -1  -2   1  179.09    8.22
   1  -2  -1  176.69    7.98
  -1  -2   1  174.89    8.53
  -1  -2   1  187.42    7.93
  -1  -2   1  189.97    7.96
  -1  -2   1  185.71    7.91
  -1  -2   1  178.95    7.90
  -1  -2   1  174.67    8.09
   1  -2  -1  184.47    8.25
  -1  -2   1  179.12    7.95
   1  -2  -1  174.31    8.06
   1  -2  -1  155.86    8.57
   1  -2  -1  190.60    7.99
   1  -2  -1  180.36    7.88
   1  -2  -1  186.16    7.91
  -1  -2   1  171.71    8.39
  -1  -2   1  178.93    7.90
   1  -2  -1  183.06    7.97
   1  -2  -1  175.59    8.02
   1  -2  -1  192.34    7.91
   1   2  -1  186.10    7.95
  -1   2   1  183.66    7.97
  -1   2   1  179.65    7.87
   1   2  -1  172.46    8.32
   1   2  -1  179.08    7.90
   1   2  -1  180.01    7.95
  -1   2   1  175.30    7.91
  -1   2   1  181.88    8.16
  -1   2   1  170.07    8.05
   1   2  -1  184.67    7.92
   1   2  -1  146.49    8.11
   1   2  -1  174.21    7.91
   1   2  -1  172.80    8.12
   1   2  -1  164.93    8.73
  -1   2   1  180.85    7.90
  -1   2   1  178.29    8.02
  -1   2   1  177.38    7.88
  -1   2   1  185.32    7.93
  -1   2   1  172.84    7.88
   1   2  -1  186.06    8.03
   1   2  -1  165.49    8.22
   1   2  -1  189.66    7.92
  -1   2   1  177.21    7.84
  -1   2   1  189.62    7.90
   1  -2   1    4.49    0.33
   1  -2   1    5.82    0.40
  -1  -2  -1    4.11    0.43
  -1  -2  -1    4.80    0.46
   1  -2   1    5.38    0.35
  -1  -2  -1    5.33    0.43
   1  -2   1    5.24    0.42
  -1  -2  -1    5.77    0.44
  -1  -2  -1    4.16    0.41
  -1  -2  -1    5.38    0.40
  -1  -2  -1    5.79    0.45
   1  -2   1    5.28    0.36
  -1  -2  -1    4.54    0.55
   1  -2   1    4.19    0.33
  -1   2  -1    5.28    0.35
  -1   2  -1    4.42    0.29
   1   2   1    5.64    0.44
   1   2   1    3.28    0.48
   1   2   1    7.34    0.66
   1   2   1    4.52    0.55
   1   2   1    4.40    0.44
   1   2   1    6.10    0.46
   1   2   1    4.06    0.64
  -1   2  -1    5.29    0.41
  -1   2  -1    5.52    0.35
   1   2   1    5.28    0.46
   1   2   1    5.61    0.42
  -2  -2  -1    2.97    0.54
   2  -2   1    2.08    0.33
  -2  -2  -1    3.12    0.50
  -2  -2  -1    2.39    0.53
   2  -2   1    2.47    0.36
  -2  -2  -1    2.37    0.60
   2  -2   1    3.16    0.48
  -2  -2  -1    3.07    0.77
   2  -2   1    3.42    0.43
   2  -2   1    2.71    0.56
  -2  -2  -1    3.27    0.47
   2  -2   1    2.33    0.32
  -2  -2  -1    2.66    0.43
   2  -2   1    2.62    0.55
  -2  -2  -1    2.28    0.90
   2  -2   1    2.87    0.46
   2  -2   1    3.00    0.46
   2  -2   1    3.17    0.43
  -2  -2  -1    3.49    0.83
   2  -2   1    3.70    0.94
   2  -2   1    2.59    0.58
  -2  -2  -1    3.06    0.46
  -2  -2  -1    2.87    0.43
   2   2   1    2.78    0.44
  -2   2  -1    3.20    0.41
   2   2   1    3.46    0.77
  -2   2  -1    2.63    0.33
   2   2   1    3.32    0.57
  -2   2  -1    2.74    0.38
   2   2   1    5.15    0.58
  -2   2  -1    2.72    0.37
  -2   2  -1    3.50    0.79
   2   2   1    5.12    0.58
  -2   2  -1    3.15    0.47
   2   2   1    2.48    0.53
  -2   2  -1    2.55    0.40
   2   2   1    4.01    0.89
   2   2   1    3.69    0.48
   2   2   1    2.71    0.51
  -2   2  -1    2.80    0.26
  -2   2  -1    3.03    0.47
   2   2   1    2.78    0.58
   3  -2   1   21.73    1.39
  -3  -2  -1   21.49    1.43
  -3  -2  -1   22.61    2.07
   3  -2   1   21.46    1.53
   3  -2   1   25.35    2.08
  -3  -2  -1   26.35    2.68
   3  -2   1   21.33    2.02
   3  -2   1   21.98    1.51
  -3  -2  -1   24.98    2.18
   3  -2   1   21.09    1.34
  -3  -2  -1   22.14    1.45
  -3  -2  -1   21.50    1.49
  -3  -2  -1   20.66    1.50
   3  -2   1   20.13    1.45
   3  -2   1   22.94    1.42
   3  -2   1   19.64    1.49
  -3  -2  -1   22.23    1.42
   3  -2   1   23.06    1.98
  -3  -2  -1   22.73    1.41
  -3  -2  -1   20.19    1.59
  -3  -2  -1   23.69    1.94
   3  -2   1   23.28    2.44
   3  -2   1   23.04    1.48
   3   2   1   21.90    1.88
  -3   2  -1   22.21    1.36
   3   2   1   22.04    2.04
  -3   2  -1   24.62    1.55
   3   2   1   21.18    1.63
  -3   2  -1   21.59    1.24
  -3   2  -1   22.46    1.16
  -3   2  -1   19.24    1.30
   3   2   1   20.53    1.67
  -3   2  -1   24.94    1.27
  -3   2  -1   21.37    1.52
  -3   2  -1   24.24    2.21
  -3   2  -1   20.63    1.29
  -3   2  -1   21.92    1.39
   3   2   1   21.43    1.52
   3   2   1   20.96    1.46
   3   2   1   25.77    2.65
  -3   2  -1   21.76    1.35
  -3   2  -1   22.66    1.50
   3   2   1   20.68    2.29
   3   2   1   21.46    1.41
   4  -2   1   41.71    2.30
   4  -2   1   36.58    2.67
  -4  -2  -1   44.29    3.34
  -4  -2  -1   38.76    3.16
  -4  -2  -1   40.79    2.46
   4  -2   1   39.77    2.46
   4  -2   1   39.07    2.56
   4  -2   1   38.12    3.48
  -4  -2  -1   44.22    2.66
  -4  -2  -1   41.42    3.92
   4  -2   1   38.10    3.77
   4  -2   1   39.31    3.20
  -4  -2  -1   37.74    2.28
  -4  -2  -1   40.36    2.50
   4  -2   1   40.69    2.50
   4  -2   1   42.75    2.58
  -4  -2  -1   39.28    2.37
   4  -2   1   37.99    3.20
  -4  -2  -1   40.02    2.36
  -4  -2  -1   40.03    2.97
   4  -2   1   42.18    2.48
   4   2   1   38.92    3.76
   4   2   1   41.04    2.36
   4   2   1   36.12    2.78
   4   2   1   33.55    3.10
  -4   2  -1   41.75    2.32
   4   2   1   39.39    3.09
  -4   2  -1   40.24    2.15
   4   2   1   45.22    4.13
  -4   2  -1   40.72    2.58
  -4   2  -1   37.01    2.44
   4   2   1   38.87    2.45
  -4   2  -1   44.89    3.54
   4   2   1   39.54    2.61
   4   2   1   40.22    2.51
  -4   2  -1   40.02    2.24
  -4   2  -1   41.62    2.24
  -4   2  -1   38.30    2.03
  -4   2  -1   37.92    2.26
  -4   2  -1   38.42    2.24
   4   2   1   36.95    2.44
  -4   2  -1   40.66    2.54
   5  -2   1    2.92    0.83
   5  -2   1    2.66    0.71
   5  -2   1    5.22    1.76
   5  -2   1    3.24    0.64
   5  -2   1    4.52    0.93
  -5  -2  -1    1.92    0.57
   5  -2   1    3.41    0.82
  -5  -2  -1    6.83    1.45
  -5  -2  -1    2.35    0.62
  -5  -2  -1    1.70    0.63
  -5  -2  -1    3.58    1.06
  -5  -2  -1    2.89    0.61
   5  -2   1    3.14    0.88
  -5  -2  -1    7.91    2.01
   5  -2   1    8.06    1.77
   5  -2   1    2.64    1.37
  -5  -2  -1    3.34    0.74
   5  -2   1    3.17    0.97
  -5  -2  -1    2.76    0.79
  -5  -2  -1    8.22    1.58
   5  -2   1    6.18    1.50
  -5   2  -1    3.21    0.44
  -5   2  -1    7.59    1.77
   5   2   1    3.04    0.68
   5   2   1    4.46    0.92
  -5   2  -1    2.73    0.61
   5   2   1    3.54    0.80
   5   2   1    2.44    0.94
  -5   2  -1    2.40    0.46
   5   2   1    1.14    0.67
   5   2   1    1.57    0.87
   5   2   1   10.19    2.51
   5   2   1    3.01    0.81
   5   2   1    3.65    1.58
  -5   2  -1    1.72    0.49
  -5   2  -1    2.84    0.76
  -5   2  -1    4.05    0.72
  -5   2  -1    2.63    0.71
   5   2   1    6.46    1.60
  -6  -2  -1   14.60    2.14
   6  -2   1   13.94    2.58
  -6  -2  -1   15.16    2.30
   6  -2   1   14.13    1.79
  -6  -2  -1   13.24    1.31
  -6  -2  -1   12.15    1.44
   6  -2   1    9.86    2.73
   6  -2   1   14.51    1.94
   6  -2   1   12.05    1.70
  -6  -2  -1   12.04    1.50
  -6  -2  -1   15.35    3.20
   6  -2   1   15.15    2.19
   6  -2   1   12.79    1.46
   6  -2   1   12.96    3.11
   6  -2   1   11.57    2.24
  -6  -2  -1   15.69    2.48
   6  -2   1   10.85    2.34
   6  -2   1   11.19    1.57
  -6  -2  -1   11.49    1.19
  -6  -2  -1   15.21    1.83
  -6  -2  -1   11.69    1.61
  -6   2  -1   13.08    1.07
   6   2   1   11.99    1.72
   6   2   1   15.23    3.34
   6   2   1   12.53    1.64
   6   2   1   14.18    2.68
  -6   2  -1   12.06    0.80
  -6   2  -1   14.79    1.56
  -6   2  -1   15.14    1.81
   6   2   1   15.74    3.53
  -6   2  -1   13.34    1.41
   6   2   1   11.11    1.58
   6   2   1   12.81    2.50
  -6   2  -1   15.11    1.24
  -6   2  -1   13.30    1.76
   6   2   1   11.72    2.24
   6   2   1   12.22    1.47
  -6   2  -1   12.79    2.59
  -6   2  -1   11.78    1.35
  -6   2  -1   12.45    0.83
   7  -2   1    0.88    0.55
  -7  -2  -1    1.61    0.91
   7  -2   1    2.80    1.95
   7  -2   1    2.40    0.99
  -7  -2  -1    0.76    0.49
   7  -2   1    0.89    0.68
  -7  -2  -1    2.64    1.49
  -7  -2  -1    0.91    0.60
   7  -2   1    2.71    1.43
  -7  -2  -1    0.65    0.66
   7  -2   1    4.53    2.28
   7  -2   1    2.46    1.33
   7  -2   1    1.57    0.87
   7  -2   1    0.27    0.84
  -7  -2  -1    0.25    0.53
   7  -2   1    1.79    1.03
  -7  -2  -1    2.22    0.91
  -7  -2  -1    1.35    0.78
   7   2   1    1.62    1.55
   7   2   1    3.61    1.98
   7   2   1    0.44    0.75
   7   2   1    1.59    1.14
  -7   2  -1    2.22    0.73
   7   2   1    1.05    0.97
  -7   2  -1    0.10    0.45
   7   2   1    2.23    0.81
   7   2   1    1.34    0.80
  -7   2  -1    2.28    1.30
   7   2   1    0.18    0.97
   7   2   1    1.05    0.58
   7   2   1    2.48    1.33
  -7   2  -1    1.47    0.49
   8  -2   1    7.34    2.51
   8  -2   1   12.90    3.85
  -8  -2  -1    7.18    1.30
   8  -2   1    6.00    2.30
  -8  -2  -1    6.71    2.65
   8  -2   1    8.39    1.68
  -8  -2  -1    8.86    1.94
  -8  -2  -1    8.62    1.45
   8  -2   1    7.23    1.62
   8  -2   1    7.45    1.52
   8  -2   1    5.92    2.17
  -8  -2  -1    5.07    1.16
   8  -2   1    9.25    1.47
   8  -2   1    8.25    3.35
   8  -2   1    8.69    2.34
   8   2   1    8.27    1.72
  -8   2  -1    7.91    1.35
   8   2   1    8.77    3.02
   8   2   1    9.01    2.47
   8   2   1    6.73    3.04
  -8   2  -1    8.41    1.27
   8   2   1    6.17    2.01
   8   2   1    7.66    2.55
   8   2   1   13.02    3.04
   8   2   1    5.50    1.39
  -8   2  -1    4.19    0.76
   8   2   1    9.57    1.67
   8   2   1    9.24    1.50
  -9  -2  -1    0.48    0.65
  -9  -2  -1    0.69    0.60
   9  -2   1   -0.67    0.77
   9  -2   1    0.64    0.55
   9  -2   1   -0.04    0.60
   9  -2   1   -0.30    0.76
   9   2   1   -0.48    0.58
   9   2   1    0.44    0.96
   9   2   1    0.49    0.61
  -9   2  -1    1.03    0.68
  -9   2  -1   -0.34    0.50
   9   2   1    0.54    0.89
  10  -2   1    3.32    1.43
 -10  -2  -1    6.08    1.43
  10  -2   1    5.40    1.37
 -10  -2  -1    5.54    1.38
  10  -2   1    3.17    1.24
 -10   2  -1    3.89    1.20
  10   2   1    5.18    1.33
  10   2   1    2.34    1.24
  10   2   1    2.55    1.24
  11  -2   1    3.04    1.39
  11  -2   1    2.67    1.22
  11  -2   1    5.74    1.77
 -11  -2  -1    2.82    1.12
  11   2   1    1.93    1.39
 -11   2  -1    2.50    1.13
  11   2   1    2.97    1.32
  11   2   1    2.14    1.35
 -12  -3   1   12.21    2.19
  12  -3  -1   10.46    2.51
 -12   3   1   12.73    2.18
  12   3  -1   10.78    2.21
  12   3  -1   14.18    2.63
  11  -3  -1   11.61    2.04
  11  -3  -1   13.41    2.37
 -11  -3   1    9.81    1.90
  11  -3  -1    9.36    2.11
 -11  -3   1   10.70    1.95
 -11   3   1    7.40    1.63
  11   3  -1   12.20    2.10
  11   3  -1   11.80    2.39
  11   3  -1   11.29    2.32
  10  -3  -1   11.29    1.84
  10  -3  -1    9.84    2.01
 -10  -3   1    8.85    1.75
  10  -3  -1   15.87    2.50
 -10  -3   1    9.13    1.66
  10   3  -1   11.04    1.87
  10   3  -1    6.64    1.76
 -10   3   1    9.89    1.71
  10   3  -1   11.84    2.10
 -10   3   1    9.82    1.58
  -9  -3   1    7.27    2.06
   9  -3  -1    7.85    1.41
  -9  -3   1    9.79    1.61
  -9  -3   1    8.74    1.63
   9  -3  -1    6.38    1.74
   9  -3  -1    8.24    2.74
   9  -3  -1    7.56    1.68
   9  -3  -1    8.77    1.83
   9   3  -1    6.14    1.54
  -9   3   1    8.91    1.42
   9   3  -1    4.74    1.59
   9   3  -1    9.56    1.77
   9   3  -1    5.09    1.20
  -9   3   1    7.56    1.44
   8  -3  -1   47.55    8.01
   8  -3  -1   49.01    7.20
   8  -3  -1   48.53    3.72
   8  -3  -1   54.14    6.81
   8  -3  -1   53.31    3.79
   8  -3  -1   51.03    3.39
  -8  -3   1   55.25    3.62
  -8  -3   1   58.01    3.69
  -8  -3   1   53.84    4.00
  -8  -3   1   56.70    4.77
  -8  -3   1   45.09    4.39
  -8  -3   1   59.31    6.27
  -8  -3   1   54.79    3.49
   8  -3  -1   53.62    5.47
   8  -3  -1   49.19    3.92
  -8  -3   1   52.59    4.51
   8  -3  -1   45.16    4.97
   8   3  -1   60.66    5.43
  -8   3   1   55.45    3.20
  -8   3   1   53.72    3.45
  -8   3   1   52.92    3.33
   8   3  -1   46.01    6.01
   8   3  -1   52.33    3.96
   8   3  -1   53.37    8.43
   8   3  -1   50.99    3.46
   8   3  -1   58.65    3.95
   8   3  -1   55.05    6.89
   8   3  -1   46.46    5.06
   8   3  -1   49.90    7.38
   8   3  -1   51.08    3.73
  -7  -3   1   42.20    3.95
  -7  -3   1   32.05    3.49
   7  -3  -1   38.46    2.56
   7  -3  -1   30.04    5.70
   7  -3  -1   34.16    3.71
   7  -3  -1   44.92    4.61
   7  -3  -1   35.33    4.68
   7  -3  -1   34.06    2.75
  -7  -3   1   37.82    3.04
  -7  -3   1   37.57    2.60
   7  -3  -1   28.64    4.28
  -7  -3   1   36.01    3.60
  -7  -3   1   43.99    6.08
   7  -3  -1   38.33    3.05
   7  -3  -1   37.57    2.85
  -7  -3   1   41.83    2.90
  -7  -3   1   37.18    2.58
  -7  -3   1   34.24    2.63
   7  -3  -1   35.59    5.53
   7   3  -1   37.54    4.67
  -7   3   1   36.71    2.42
  -7   3   1   34.87    3.88
  -7   3   1   33.67    2.41
   7   3  -1   39.79    4.23
   7   3  -1   33.05    6.22
   7   3  -1   36.74    4.70
   7   3  -1   39.29    2.62
   7   3  -1   40.48    3.07
  -7   3   1   34.98    2.52
   7   3  -1   35.38    2.79
  -7   3   1   39.96    2.26
   7   3  -1   37.07    5.14
  -7   3   1   34.93    2.56
   7   3  -1   32.05    2.69
   6  -3  -1   25.59    2.21
  -6  -3   1   33.82    3.44
   6  -3  -1   30.88    3.95
  -6  -3   1   27.11    2.14
  -6  -3   1   35.46    4.99
  -6  -3   1   29.27    2.09
   6  -3  -1   28.55    4.53
   6  -3  -1   28.44    2.03
   6  -3  -1   33.53    3.46
  -6  -3   1   29.62    2.50
   6  -3  -1   25.08    3.28
  -6  -3   1   29.25    3.09
   6  -3  -1   26.71    4.71
  -6  -3   1   32.37    2.51
   6  -3  -1   25.90    3.72
  -6  -3   1   26.56    2.31
   6  -3  -1   36.41    2.62
   6  -3  -1   26.83    2.22
  -6  -3   1   32.91    3.26
  -6  -3   1   28.60    2.17
   6   3  -1   28.73    2.37
   6   3  -1   33.32    3.39
  -6   3   1   31.00    3.31
  -6   3   1   32.01    2.30
  -6   3   1   27.25    2.03
   6   3  -1   19.91    3.93
  -6   3   1   29.33    2.05
   6   3  -1   25.25    4.77
  -6   3   1   25.53    1.95
  -6   3   1   30.08    2.35
   6   3  -1   30.60    2.32
  -6   3   1   31.03    1.87
   6   3  -1   29.25    3.89
   6   3  -1   29.25    3.90
  -6   3   1   29.75    1.67
   6   3  -1   26.86    2.06
   6   3  -1   25.08    3.88
   6   3  -1   28.90    2.29
  -6   3   1   29.74    1.87
  -6   3   1   35.88    2.80
  -5  -3   1    7.50    1.75
  -5  -3   1    6.69    1.13
   5  -3  -1    7.18    1.12
  -5  -3   1    9.68    1.41
  -5  -3   1    9.33    1.92
  -5  -3   1    8.66    1.10
   5  -3  -1    6.79    1.64
   5  -3  -1    6.78    1.18
  -5  -3   1    6.82    1.28
   5  -3  -1    7.90    2.12
   5  -3  -1    8.18    1.00
  -5  -3   1    8.47    1.25
  -5  -3   1   10.46    2.44
  -5  -3   1    8.03    1.92
   5  -3  -1    8.72    1.58
   5  -3  -1    7.77    1.76
   5  -3  -1    7.86    1.19
   5  -3  -1    6.00    2.10
  -5  -3   1    6.54    1.03
   5  -3  -1    5.72    1.49
  -5   3   1    8.61    0.79
   5   3  -1    6.37    1.10
   5   3  -1    8.90    2.64
  -5   3   1    9.77    1.30
   5   3  -1    7.57    1.78
   5   3  -1    7.64    1.92
   5   3  -1    8.44    1.23
  -5   3   1    7.79    1.43
   5   3  -1    8.46    1.92
  -5   3   1    7.54    0.96
   5   3  -1    7.40    1.16
  -5   3   1    8.81    1.08
   5   3  -1    8.32    1.05
   5   3  -1    7.62    1.79
  -5   3   1    7.32    0.97
  -5   3   1    8.22    1.04
   5   3  -1    4.46    1.74
  -5   3   1    8.44    1.86
  -5   3   1    8.88    0.69
  -5   3   1    8.14    1.19
   4  -3  -1   20.03    1.56
   4  -3  -1   22.51    1.89
  -4  -3   1   22.71    1.78
  -4  -3   1   21.67    2.28
  -4  -3   1   19.31    1.40
  -4  -3   1   15.89    2.74
   4  -3  -1   19.34    2.38
  -4  -3   1   22.77    3.10
   4  -3  -1   17.76    2.27
  -4  -3   1   18.79    1.45
   4  -3  -1   20.00    1.36
  -4  -3   1   20.25    1.92
   4  -3  -1   18.51    1.48
   4  -3  -1   21.71    3.11
   4  -3  -1   19.64    2.10
  -4  -3   1   19.35    1.56
   4  -3  -1   20.25    1.63
  -4  -3   1   17.86    1.65
   4  -3  -1   16.75    2.95
  -4  -3   1   22.15    2.72
   4   3  -1   20.73    1.56
   4   3  -1   19.26    2.67
   4   3  -1   20.89    2.59
  -4   3   1   21.24    1.59
  -4   3   1   20.60    1.40
  -4   3   1   20.28    1.44
  -4   3   1   21.29    1.61
  -4   3   1   20.26    1.17
  -4   3   1   18.38    1.35
   4   3  -1   21.45    2.66
   4   3  -1   15.42    2.97
  -4   3   1   22.61    1.44
  -4   3   1   21.97    2.25
  -4   3   1   20.68    1.60
   4   3  -1   16.45    1.46
   4   3  -1   18.40    1.37
  -4   3   1   20.74    1.96
   4   3  -1   18.84    2.44
   4   3  -1   20.53    3.12
  -4   3   1   20.08    1.36
  -4   3   1   20.98    1.31
   4   3  -1   21.51    1.59
   3  -3  -1   20.34    1.46
   3  -3  -1   24.29    1.90
  -3  -3   1   20.34    1.91
  -3  -3   1   25.99    2.25
   3  -3  -1   18.26    1.48
  -3  -3   1   21.09    1.41
  -3  -3   1   21.13    2.80
   3  -3  -1   22.46    1.42
  -3  -3   1   19.66    1.73
   3  -3  -1   23.33    1.40
  -3  -3   1   27.39    2.73
   3  -3  -1   19.40    1.30
  -3  -3   1   20.58    1.55
  -3  -3   1   25.85    2.25
   3  -3  -1   20.82    1.81
   3  -3  -1   17.49    2.56
  -3  -3   1   21.18    1.48
   3  -3  -1   22.03    1.62
   3  -3  -1   24.15    1.88
  -3  -3   1   22.54    1.39
   3  -3  -1   25.97    2.44
  -3   3   1   21.64    1.37
  -3   3   1   21.88    1.88
   3   3  -1   19.63    2.45
  -3   3   1   22.70    1.37
  -3   3   1   22.24    1.54
  -3   3   1   19.74    1.14
   3   3  -1   20.77    2.02
   3   3  -1   25.78    2.19
  -3   3   1   23.12    1.32
  -3   3   1   25.21    2.10
  -3   3   1   22.78    1.36
  -3   3   1   21.99    1.34
   3   3  -1   22.40    1.37
   3   3  -1   22.01    1.49
   3   3  -1   26.65    2.15
   3   3  -1   21.67    1.47
  -3   3   1   18.86    1.25
  -3   3   1   22.97    1.47
  -3   3   1   21.34    1.48
   3   3  -1   20.84    3.06
   3   3  -1   26.58    2.67
  -3   3   1   18.20    1.27
   3   3  -1   21.68    1.46
   3   3  -1   20.92    1.52
  -2  -3   1   53.73    2.55
  -2  -3   1   56.50    2.65
   2  -3  -1   48.10    2.70
   2  -3  -1   47.59    2.64
  -2  -3   1   49.77    2.60
  -2  -3   1   51.55    2.52
   2  -3  -1   51.85    2.49
   2  -3  -1   49.09    2.81
   2  -3  -1   51.61    2.50
   2  -3  -1   46.74    3.41
  -2  -3   1   53.61    2.54
   2  -3  -1   48.54    3.13
  -2  -3   1   54.04    3.22
  -2  -3   1   48.41    2.54
   2  -3  -1   49.57    2.61
   2  -3  -1   50.12    2.47
  -2  -3   1   52.95    3.18
   2  -3  -1   49.79    2.60
  -2  -3   1   50.74    3.56
   2  -3  -1   53.66    2.54
   2  -3  -1   50.60    2.68
   2   3  -1   50.94    2.56
   2   3  -1   41.74    3.02
  -2   3   1   51.50    3.06
  -2   3   1   40.47    2.40
   2   3  -1   51.42    2.52
   2   3  -1   48.29    2.87
  -2   3   1   50.57    2.45
   2   3  -1   48.92    3.46
  -2   3   1   50.59    2.45
   2   3  -1   47.34    3.73
   2   3  -1   47.36    3.22
  -2   3   1   47.33    2.46
   2   3  -1   53.21    3.03
   2   3  -1   50.56    3.07
   2   3  -1   50.93    2.59
  -2   3   1   52.98    2.48
  -2   3   1   47.37    2.58
  -2   3   1   53.00    2.48
   2   3  -1   53.19    2.56
  -2   3   1   50.26    2.28
  -2   3   1   49.65    2.30
   2   3  -1   49.16    2.58
  -2   3   1   52.20    2.94
  -2   3   1   50.82    2.66
  -2   3   1   50.57    2.42
   2   3  -1   53.32    2.55
  -1  -3   1    7.33    0.46
   1  -3  -1    8.32    0.51
   1  -3  -1    7.68    0.57
   1  -3  -1    7.12    0.46
  -1  -3   1    6.42    0.47
   1  -3  -1   10.42    0.73
  -1  -3   1    7.00    0.49
   1  -3  -1    6.61    0.45
   1  -3  -1    7.01    0.45
   1  -3  -1    6.65    0.43
   1  -3  -1    6.57    0.59
  -1  -3   1    7.19    0.57
   1  -3  -1    8.47    0.62
   1  -3  -1    6.84    0.40
  -1  -3   1    6.65    0.82
  -1  -3   1    9.57    0.58
   1  -3  -1    7.99    0.49
  -1  -3   1    5.67    0.81
  -1  -3   1    7.36    0.49
  -1  -3   1    6.27    1.10
   1  -3  -1    5.67    0.95
  -1  -3   1    7.35    0.54
   1  -3  -1    6.95    0.47
   1   3  -1    8.35    0.54
  -1   3   1    6.80    0.89
   1   3  -1    8.01    0.50
  -1   3   1    8.40    0.48
  -1   3   1    6.48    0.40
  -1   3   1    5.89    0.44
   1   3  -1    6.79    0.48
  -1   3   1    9.72    0.63
   1   3  -1    7.07    1.13
  -1   3   1    8.22    0.49
   1   3  -1    7.82    0.48
   1   3  -1    6.87    0.64
  -1   3   1    7.18    0.56
   1   3  -1    6.91    0.72
   1   3  -1    6.86    0.47
   1   3  -1    6.65    0.43
  -1   3   1    6.86    0.45
  -1   3   1    9.41    0.64
   0  -3  -1   66.57    3.09
   0  -3  -1   64.73    3.02
   0  -3  -1   64.73    3.05
   0  -3  -1   70.90    3.20
   0  -3  -1   67.67    3.08
   0  -3  -1   62.78    3.07
   0  -3  -1   67.76    3.57
   0  -3  -1   70.53    3.16
   0  -3   1   66.13    2.94
   0  -3  -1   64.42    3.23
   0  -3  -1   71.22    3.14
   0  -3  -1   68.47    3.28
   0  -3  -1   68.75    3.08
   0   3  -1   65.60    2.94
   0   3   1   65.55    3.13
   0   3   1   65.82    3.09
   0   3   1   65.62    3.06
   0   3   1   69.24    3.15
   0   3   1   66.01    3.18
   0   3   1   66.23    3.15
  -1  -3  -1   89.52    4.43
  -1  -3  -1   79.15    3.92
  -1  -3  -1   79.33    3.82
  -1  -3  -1   93.77    4.15
  -1  -3  -1   79.29    3.77
   1  -3   1   76.74    3.77
  -1  -3  -1   83.15    3.87
  -1  -3  -1   95.60    4.20
   1  -3   1   79.12    3.67
  -1  -3  -1   80.30    3.81
   1  -3   1   81.91    3.66
   1   3   1   81.96    3.83
   1   3   1   75.88    4.20
   1   3   1   76.81    3.77
   1   3   1   78.44    4.02
   1   3   1   77.55    3.82
   1   3   1   85.57    4.05
   1   3   1   76.71    3.89
   1   3   1   90.94    4.10
  -1   3  -1   77.18    3.66
   1   3   1   95.00    4.45
   1   3   1   81.57    3.84
   1   3   1   76.13    3.92
  -1   3  -1   80.30    3.77
   2  -3   1  111.05    6.24
   2  -3   1  126.89    5.49
  -2  -3  -1  118.43    6.26
  -2  -3  -1  125.68    5.61
  -2  -3  -1  121.35    6.84
  -2  -3  -1  120.50    5.57
  -2  -3  -1  123.11    5.71
  -2  -3  -1  115.39    5.68
   2  -3   1  117.57    5.37
   2  -3   1  117.18    5.61
  -2  -3  -1  116.30    5.63
   2  -3   1  115.91    5.42
   2  -3   1  123.80    5.50
   2  -3   1  118.31    5.74
   2  -3   1  112.50    5.66
   2  -3   1  119.09    5.48
  -2  -3  -1  123.65    5.83
   2  -3   1  123.61    5.53
  -2  -3  -1  120.60    5.81
  -2  -3  -1  118.90    5.62
  -2  -3  -1  120.55    6.19
   2  -3   1  113.87    5.50
   2  -3   1  117.85    5.47
   2  -3   1  112.59    5.64
  -2  -3  -1  117.23    6.30
   2   3   1  118.18    5.63
  -2   3  -1  124.30    5.52
  -2   3  -1  125.89    5.49
  -2   3  -1  121.83    5.40
  -2   3  -1  122.18    5.63
   2   3   1  117.38    5.59
   2   3   1  112.02    6.12
   2   3   1  128.70    5.60
  -2   3  -1  114.63    5.46
   2   3   1  125.93    5.92
   2   3   1  120.14    5.78
  -2   3  -1  113.81    5.83
  -2   3  -1  125.42    5.43
   2   3   1  122.64    6.54
   2   3   1  117.02    6.09
   2   3   1  126.03    5.66
   2   3   1  123.77    6.08
   2   3   1  123.33    5.69
  -3  -3  -1   18.04    1.29
   3  -3   1   16.51    1.20
  -3  -3  -1   18.56    1.22
   3  -3   1   17.75    1.18
   3  -3   1   19.96    1.27
  -3  -3  -1   20.36    1.38
   3  -3   1   17.34    1.13
   3  -3   1   16.69    1.28
  -3  -3  -1   16.90    1.43
  -3  -3  -1   16.69    1.23
   3  -3   1   15.77    1.66
   3  -3   1   17.28    1.12
   3  -3   1   20.93    1.41
  -3  -3  -1   15.94    1.68
  -3  -3  -1   16.18    1.34
   3  -3   1   19.41    1.31
   3   3   1   17.77    1.72
  -3   3  -1   18.18    1.30
  -3   3  -1   17.70    1.14
   3   3   1   19.71    1.36
  -3   3  -1   15.02    0.92
   3   3   1   17.55    1.55
  -3   3  -1   19.36    1.16
   3   3   1   16.67    1.27
  -3   3  -1   15.91    1.11
  -3   3  -1   15.37    1.06
   3   3   1   17.52    1.22
   3   3   1   17.73    1.45
  -3   3  -1   18.49    1.26
   3   3   1   18.97    2.54
  -4  -3  -1   49.89    3.02
  -4  -3  -1   48.87    2.87
   4  -3   1   53.08    4.44
  -4  -3  -1   51.11    3.00
  -4  -3  -1   47.90    2.80
  -4  -3  -1   48.13    3.80
   4  -3   1   51.97    3.70
   4  -3   1   53.68    2.99
   4  -3   1   54.58    2.97
  -4  -3  -1   47.38    3.10
  -4  -3  -1   50.37    2.90
  -4  -3  -1   50.56    3.83
   4  -3   1   51.77    3.05
   4  -3   1   47.65    3.95
   4  -3   1   48.94    2.88
  -4  -3  -1   53.28    4.62
   4  -3   1   53.90    3.08
   4  -3   1   56.19    3.85
   4  -3   1   48.93    3.12
   4  -3   1   51.49    2.77
  -4  -3  -1   52.19    3.63
  -4   3  -1   53.49    3.00
  -4   3  -1   52.80    3.00
   4   3   1   51.29    2.87
   4   3   1   58.48    3.96
  -4   3  -1   51.42    2.50
  -4   3  -1   46.62    2.72
   4   3   1   48.66    2.95
   4   3   1   51.40    3.02
   4   3   1   47.59    3.67
   4   3   1   48.07    3.79
  -4   3  -1   60.87    4.00
  -4   3  -1   47.61    2.68
   4   3   1   51.52    3.49
  -4   3  -1   53.39    2.68
  -4   3  -1   50.55    2.78
   4   3   1   53.63    3.03
   4   3   1   45.41    3.05
   4   3   1   48.11    4.37
   5  -3   1   23.73    1.85
  -5  -3  -1   22.81    1.87
   5  -3   1   26.63    3.28
  -5  -3  -1   21.47    1.69
  -5  -3  -1   24.28    2.04
  -5  -3  -1   17.96    2.63
  -5  -3  -1   25.87    2.45
   5  -3   1   21.25    1.87
   5  -3   1   22.97    2.23
   5  -3   1   27.07    4.04
   5  -3   1   24.31    1.66
   5  -3   1   24.82    1.89
  -5  -3  -1   25.03    1.86
  -5  -3  -1   29.53    4.24
  -5  -3  -1   20.62    2.84
   5  -3   1   23.15    1.95
   5  -3   1   16.90    3.04
   5  -3   1   24.07    3.07
  -5  -3  -1   24.34    1.78
   5  -3   1   24.18    2.03
  -5  -3  -1   23.77    1.71
  -5   3  -1   22.62    1.36
  -5   3  -1   23.09    1.60
   5   3   1   25.46    3.29
   5   3   1   25.36    3.19
   5   3   1   25.37    4.07
  -5   3  -1   24.36    1.59
  -5   3  -1   24.44    1.91
  -5   3  -1   21.25    2.91
   5   3   1   22.16    1.85
   5   3   1   22.39    1.71
   5   3   1   22.02    1.88
   5   3   1   21.49    1.79
   5   3   1   25.15    3.24
   5   3   1   24.65    2.46
  -5   3  -1   20.76    1.60
  -5   3  -1   22.71    1.84
  -6  -3  -1   25.09    1.91
   6  -3   1   26.88    3.34
  -6  -3  -1   26.27    2.25
  -6  -3  -1   25.17    1.96
   6  -3   1   23.49    4.19
   6  -3   1   26.00    2.21
   6  -3   1   22.07    3.36
  -6  -3  -1   26.60    3.37
  -6  -3  -1   24.93    3.28
   6  -3   1   21.15    3.25
   6  -3   1   22.94    2.05
  -6  -3  -1   29.36    2.73
   6  -3   1   29.24    2.56
   6  -3   1   22.92    4.14
   6  -3   1   24.90    1.86
  -6  -3  -1   25.60    2.00
   6  -3   1   23.97    2.07
  -6  -3  -1   25.49    1.91
   6  -3   1   29.83    2.42
  -6  -3  -1   25.96    2.79
  -6  -3  -1   25.05    4.29
  -6   3  -1   24.86    2.12
  -6   3  -1   23.17    3.33
  -6   3  -1   24.55    2.08
   6   3   1   21.59    4.21
  -6   3  -1   23.78    1.64
   6   3   1   23.40    3.21
   6   3   1   23.28    2.07
   6   3   1   26.43    3.64
   6   3   1   21.87    4.12
   6   3   1   20.24    3.25
   6   3   1   23.80    3.38
   6   3   1   26.79    2.24
  -6   3  -1   24.79    1.48
   6   3   1   24.37    2.04
   6   3   1   24.84    1.91
  -6   3  -1   24.56    1.78
  -6   3  -1   25.94    1.88
   7  -3   1    8.72    2.33
  -7  -3  -1    7.54    1.23
  -7  -3  -1    7.67    1.31
  -7  -3  -1    6.75    1.20
  -7  -3  -1    4.07    1.44
   7  -3   1    6.53    1.15
   7  -3   1    7.43    1.43
   7  -3   1    4.75    1.83
   7  -3   1    7.62    2.76
  -7  -3  -1    7.09    1.83
  -7  -3  -1   11.63    3.18
   7  -3   1    3.58    2.21
   7  -3   1    7.39    1.82
   7  -3   1    6.19    1.29
  -7  -3  -1    6.89    1.38
   7  -3   1    6.76    1.42
  -7  -3  -1    8.73    1.84
   7  -3   1   12.03    2.60
   7   3   1    8.23    2.38
   7   3   1    8.23    1.44
   7   3   1   10.18    1.69
  -7   3  -1    6.22    0.76
   7   3   1    6.32    1.94
   7   3   1    9.47    2.23
  -7   3  -1    7.34    1.16
   7   3   1    5.38    2.51
   7   3   1    7.92    1.30
   7   3   1    7.70    2.90
   7   3   1    5.47    1.86
  -7   3  -1    6.73    1.06
   7   3   1    7.16    1.43
   8  -3   1   18.31    3.59
  -8  -3  -1   16.10    2.02
  -8  -3  -1   14.89    2.46
  -8  -3  -1   18.17    2.95
   8  -3   1   15.51    2.17
  -8  -3  -1   16.94    2.18
   8  -3   1   18.84    3.58
   8  -3   1   18.13    4.75
   8  -3   1   18.47    2.06
   8  -3   1   17.34    2.46
   8  -3   1   20.37    3.90
  -8  -3  -1   18.63    2.05
   8  -3   1   15.54    2.19
   8  -3   1   14.22    2.91
  -8  -3  -1   22.15    5.38
   8  -3   1   18.78    4.39
   8   3   1   14.23    3.12
   8   3   1   19.72    2.57
  -8   3  -1   17.26    1.13
   8   3   1   18.91    3.53
   8   3   1   18.06    2.35
   8   3   1   21.34    4.21
   8   3   1   16.96    3.50
  -8   3  -1   14.38    1.86
   8   3   1   15.77    4.55
   8   3   1   16.68    2.01
  -8   3  -1   16.02    1.54
   8   3   1   16.34    2.29
   9  -3   1    0.12    0.80
   9  -3   1    1.02    0.69
   9  -3   1    0.83    0.83
   9  -3   1    0.61    1.24
  -9  -3  -1   -0.07    0.60
   9  -3   1   -0.38    0.85
  -9  -3  -1    0.13    0.62
  -9   3  -1    0.02    0.56
   9   3   1   -0.04    0.69
   9   3   1    0.18    0.80
   9   3   1    0.05    0.58
  -9   3  -1   -0.53    0.43
   9   3   1   -0.87    0.75
  10  -3   1    0.56    0.68
  10  -3   1   -0.22    0.62
 -10  -3  -1   -0.41    0.60
 -10  -3  -1    1.18    0.90
  10  -3   1   -1.20    0.79
  10   3   1   -0.37    0.67
 -10   3  -1    0.26    0.64
  10   3   1   -0.13    0.81
  10   3   1    0.84    0.77
  11  -3   1    0.68    0.90
  11  -3   1    0.62    1.13
  11  -3   1   -0.29    0.86
 -11  -3  -1   -0.40    0.41
 -11  -3  -1    0.77    0.91
  11   3   1    0.72    1.23
  11   3   1    0.80    0.95
 -11   3  -1    0.43    0.79
  11   3   1   -0.68    0.98
  12  -4  -1    2.85    1.50
 -12  -4   1    3.61    1.30
 -12   4   1    2.09    1.19
  12   4  -1    4.65    1.59
  12   4  -1    1.58    1.28
 -11  -4   1    0.75    0.72
  11  -4  -1    1.34    1.13
  11  -4  -1    0.93    0.91
  11  -4  -1    2.38    1.20
 -11  -4   1    1.24    0.95
  11   4  -1    2.31    1.36
 -11   4   1    2.42    1.08
  11   4  -1   -0.12    0.76
  11   4  -1    0.66    0.97
  10  -4  -1    5.35    1.51
 -10  -4   1    3.21    1.12
  10  -4  -1    3.07    1.27
  10  -4  -1    2.68    1.02
 -10  -4   1    3.65    1.28
  10   4  -1    2.38    1.11
 -10   4   1    3.87    1.14
  10   4  -1    2.22    1.02
  10   4  -1    2.62    1.23
   9  -4  -1   -1.64    1.70
   9  -4  -1    1.44    0.95
   9  -4  -1    0.29    1.26
   9  -4  -1   -0.12    0.89
  -9  -4   1    0.03    0.62
  -9  -4   1    3.26    2.47
   9  -4  -1    0.69    0.81
   9  -4  -1    1.16    0.67
  -9  -4   1   -0.39    0.59
   9  -4  -1    0.99    2.06
   9   4  -1   -0.64    0.83
  -9   4   1    0.13    0.58
   9   4  -1    1.11    0.84
  -9   4   1    0.16    0.53
   9   4  -1   -0.22    0.75
   9   4  -1    0.86    0.65
  -8  -4   1   10.75    1.67
  -8  -4   1   15.53    3.86
   8  -4  -1   11.57    3.90
  -8  -4   1   14.18    2.65
   8  -4  -1   18.53    4.42
   8  -4  -1   13.47    3.13
  -8  -4   1   14.84    2.20
  -8  -4   1   10.75    1.67
  -8  -4   1   11.63    2.42
   8  -4  -1   12.93    2.00
   8  -4  -1   12.06    1.61
  -8  -4   1   10.93    2.46
  -8  -4   1   11.45    1.63
   8  -4  -1    9.28    2.58
   8  -4  -1   12.40    1.95
   8  -4  -1   13.36    3.00
   8  -4  -1    7.95    2.60
   8  -4  -1   11.62    1.99
  -8   4   1   10.36    1.42
   8   4  -1   15.06    3.19
   8   4  -1   18.22    4.42
   8   4  -1   10.83    1.58
  -8   4   1   12.74    1.65
   8   4  -1   14.59    2.08
   8   4  -1   16.41    4.64
   8   4  -1   11.65    3.17
   8   4  -1    7.37    2.40
   8   4  -1   12.27    1.86
  -8   4   1   11.73    1.07
   8   4  -1   15.15    3.17
   8   4  -1   13.80    2.14
   7  -4  -1   14.35    1.63
  -7  -4   1   10.62    2.39
   7  -4  -1   12.52    2.76
   7  -4  -1   15.82    1.99
  -7  -4   1   11.55    1.72
   7  -4  -1   13.35    3.37
   7  -4  -1   12.26    1.84
  -7  -4   1   15.85    3.62
  -7  -4   1   12.62    2.48
  -7  -4   1   12.03    2.46
   7  -4  -1   14.65    3.14
  -7  -4   1   11.98    1.65
  -7  -4   1   11.86    1.93
   7  -4  -1   11.93    1.75
   7  -4  -1   11.47    2.42
   7  -4  -1    8.97    3.21
  -7  -4   1   12.11    1.56
  -7  -4   1   13.06    1.64
   7  -4  -1   10.91    2.59
  -7   4   1   12.01    1.51
   7   4  -1   11.66    1.74
  -7   4   1   11.37    2.42
   7   4  -1   12.46    1.89
  -7   4   1   13.26    1.13
   7   4  -1   12.30    2.58
   7   4  -1    8.93    2.40
   7   4  -1   15.11    3.64
   7   4  -1   12.91    1.80
   7   4  -1   11.41    3.77
  -7   4   1   11.71    1.07
  -7   4   1   14.46    1.33
   7   4  -1   11.30    2.61
   7   4  -1   10.90    1.52
   7   4  -1   14.16    3.25
  -6  -4   1   47.38    3.32
  -6  -4   1   48.47    3.51
  -6  -4   1   44.74    2.98
  -6  -4   1   44.23    2.91
   6  -4  -1   40.57    3.99
  -6  -4   1   46.31    4.12
  -6  -4   1   43.15    4.00
   6  -4  -1   43.70    6.17
   6  -4  -1   38.83    5.42
  -6  -4   1   48.03    3.32
   6  -4  -1   42.92    2.69
   6  -4  -1   44.01    3.16
   6  -4  -1   33.30    3.70
  -6  -4   1   48.92    4.38
  -6  -4   1   42.96    2.77
   6  -4  -1   47.57    3.83
   6  -4  -1   41.62    2.95
   6  -4  -1   44.46    4.13
  -6  -4   1   45.60    5.93
   6  -4  -1   44.08    3.04
  -6   4   1   43.34    2.74
   6   4  -1   39.48    5.50
   6   4  -1   45.06    4.22
   6   4  -1   36.85    3.87
  -6   4   1   47.70    2.41
  -6   4   1   44.59    3.07
  -6   4   1   47.07    2.71
   6   4  -1   43.87    2.79
  -6   4   1   49.51    3.34
  -6   4   1   46.06    2.60
   6   4  -1   43.26    2.99
   6   4  -1   42.63    3.98
   6   4  -1   49.77    3.20
  -6   4   1   42.80    2.61
   6   4  -1   48.56    4.64
   6   4  -1   36.97    5.90
   6   4  -1   41.82    2.96
  -6   4   1   35.35    3.65
   5  -4  -1   76.70    5.46
  -5  -4   1   85.46    4.68
   5  -4  -1   89.73    5.25
  -5  -4   1   84.84    5.81
   5  -4  -1   85.25    4.65
  -5  -4   1   85.72    4.89
  -5  -4   1   78.88    4.36
   5  -4  -1   72.35    6.18
  -5  -4   1   81.16    6.60
  -5  -4   1   85.16    4.53
  -5  -4   1   78.50    5.68
  -5  -4   1   86.90    5.13
   5  -4  -1   72.45    5.39
   5  -4  -1   83.70    5.63
   5  -4  -1   83.29    4.53
  -5  -4   1   88.87    6.24
  -5  -4   1   84.48    4.77
   5  -4  -1   87.84    4.78
   5  -4  -1   68.78    6.41
   5  -4  -1   83.33    4.32
   5   4  -1   87.52    4.68
  -5   4   1   92.39    4.76
  -5   4   1   87.71    4.39
   5   4  -1   94.86    6.96
  -5   4   1   82.00    5.53
  -5   4   1   84.92    4.06
   5   4  -1   86.97    4.64
  -5   4   1   91.94    5.05
  -5   4   1   89.08    4.27
  -5   4   1   81.06    4.29
  -5   4   1   85.99    4.30
   5   4  -1   83.10    4.58
   5   4  -1   77.40    5.53
   5   4  -1   85.22    4.43
   5   4  -1   78.83    5.68
   5   4  -1   77.57    6.97
   5   4  -1   73.53    5.84
   5   4  -1   78.07    5.65
  -4  -4   1   21.61    1.60
  -4  -4   1   18.19    2.54
   4  -4  -1   22.83    2.15
  -4  -4   1   20.53    3.02
   4  -4  -1   19.67    2.93
   4  -4  -1   24.22    1.80
   4  -4  -1   23.60    2.21
   4  -4  -1   22.99    1.63
  -4  -4   1   21.48    2.10
   4  -4  -1   22.25    1.48
  -4  -4   1   23.16    3.45
   4  -4  -1   24.08    1.74
  -4  -4   1   22.73    1.72
  -4  -4   1   27.14    2.07
  -4  -4   1   25.49    1.93
   4  -4  -1   23.01    1.88
   4  -4  -1   21.05    3.26
  -4  -4   1   22.56    1.53
   4  -4  -1   22.21    2.15
  -4  -4   1   23.25    2.90
  -4   4   1   22.19    1.74
  -4   4   1   23.53    1.46
  -4   4   1   21.88    1.45
   4   4  -1   22.17    2.35
  -4   4   1   25.37    1.77
  -4   4   1   21.13    2.14
  -4   4   1   23.27    1.53
   4   4  -1   23.29    1.69
   4   4  -1   23.45    1.71
   4   4  -1   23.20    1.69
  -4   4   1   23.24    1.48
   4   4  -1   17.91    3.00
   4   4  -1   23.98    2.33
   4   4  -1   21.51    3.54
   4   4  -1   20.45    2.70
   4   4  -1   22.83    1.54
  -4   4   1   22.68    1.95
  -4   4   1   23.51    1.52
  -4   4   1   25.28    1.33
   4   4  -1   24.75    3.12
   3  -4  -1   46.16    2.94
   3  -4  -1   48.60    2.55
   3  -4  -1   51.85    2.49
   3  -4  -1   42.99    2.87
  -3  -4   1   49.16    3.37
   3  -4  -1   50.90    2.76
  -3  -4   1   45.14    2.51
  -3  -4   1   46.16    3.90
   3  -4  -1   40.36    2.80
  -3  -4   1   46.19    3.41
  -3  -4   1   48.75    2.69
   3  -4  -1   50.81    2.53
   3  -4  -1   46.00    3.76
  -3  -4   1   46.70    2.59
   3  -4  -1   41.06    3.37
  -3  -4   1   50.08    3.15
   3  -4  -1   50.06    2.71
   3  -4  -1   44.03    2.63
  -3  -4   1   46.32    3.40
  -3   4   1   43.93    3.00
   3   4  -1   48.48    2.62
  -3   4   1   50.10    2.44
  -3   4   1   46.26    2.47
   3   4  -1   44.26    3.13
   3   4  -1   43.18    3.44
   3   4  -1   48.33    2.66
   3   4  -1   50.83    2.76
   3   4  -1   42.90    3.18
  -3   4   1   47.30    2.26
  -3   4   1   50.68    3.01
   3   4  -1   43.45    3.29
  -3   4   1   48.68    2.67
   3   4  -1   43.58    4.04
  -3   4   1   51.68    2.51
  -3   4   1   52.07    2.48
  -3   4   1   45.61    2.32
  -3   4   1   51.57    2.76
   3   4  -1   45.46    2.62
   3   4  -1   50.55    2.56
   3   4  -1   48.52    3.87
   2  -4  -1   25.27    1.30
   2  -4  -1   22.43    1.24
  -2  -4   1   22.88    1.41
   2  -4  -1   24.18    1.33
   2  -4  -1   22.63    1.25
  -2  -4   1   18.98    2.55
  -2  -4   1   21.54    2.16
   2  -4  -1   22.51    1.37
  -2  -4   1   23.82    1.36
   2  -4  -1   23.42    1.32
  -2  -4   1   21.49    1.95
   2  -4  -1   22.48    1.45
   2  -4  -1   23.87    1.47
  -2  -4   1   22.71    1.31
  -2  -4   1   23.25    1.88
  -2  -4   1   24.45    1.34
   2  -4  -1   24.06    1.28
   2  -4  -1   23.59    1.44
   2  -4  -1   21.27    1.73
   2  -4  -1   21.57    1.29
  -2  -4   1   19.87    1.73
   2  -4  -1   20.90    2.01
  -2  -4   1   23.75    1.44
  -2   4   1   24.19    1.23
   2   4  -1   24.46    1.66
  -2   4   1   25.53    1.28
   2   4  -1   20.66    1.57
  -2   4   1   21.73    1.07
   2   4  -1   22.80    1.38
   2   4  -1   18.91    1.77
  -2   4   1   19.48    1.54
   2   4  -1   24.46    1.36
   2   4  -1   22.39    1.30
   2   4  -1   21.69    2.09
  -2   4   1   22.92    1.23
  -2   4   1   22.67    1.50
  -2   4   1   22.47    1.11
   2   4  -1   22.33    1.33
  -2   4   1   22.41    1.45
  -2   4   1   22.48    1.41
  -2   4   1   22.58    1.27
   2   4  -1   23.77    1.72
   2   4  -1   21.14    1.91
   2   4  -1   20.64    1.37
   2   4  -1   23.62    1.35
   2   4  -1   21.23    2.72
   1  -4  -1  137.50    6.01
  -1  -4   1  132.16    6.51
   1  -4  -1  132.63    6.21
   1  -4  -1  138.01    6.06
  -1  -4   1  145.54    6.11
  -1  -4   1  116.98    6.92
   1  -4  -1  144.50    6.07
   1  -4  -1  139.01    6.08
  -1  -4   1  140.20    6.72
  -1  -4   1  135.34    6.14
   1  -4  -1  133.64    6.20
  -1  -4   1  131.90    6.24
  -1  -4   1  133.36    6.38
   1  -4  -1  133.71    6.26
  -1  -4   1  134.95    6.04
  -1  -4   1  132.89    6.09
  -1  -4   1  134.46    6.17
   1  -4  -1  140.83    6.09
   1  -4  -1  119.78    6.66
  -1  -4   1  136.36    6.09
  -1  -4   1  133.81    6.02
   1   4  -1  139.08    6.25
  -1   4   1  141.33    6.03
  -1   4   1  144.08    6.05
   1   4  -1  142.80    6.12
  -1   4   1  129.23    6.35
   1   4  -1  136.47    6.11
   1   4  -1  137.82    6.10
  -1   4   1  139.16    6.02
  -1   4   1  139.61    6.23
  -1   4   1  137.48    6.09
   1   4  -1  136.40    6.08
   1   4  -1  129.42    6.43
   1   4  -1  135.49    6.12
   1   4  -1  135.42    6.05
  -1   4   1  135.93    6.25
   1   4  -1  126.23    6.86
  -1   4   1  136.43    6.07
   0  -4  -1   16.69    1.00
   0  -4   1   16.41    0.76
   0  -4  -1   16.52    0.86
   0  -4  -1   16.51    1.08
   0  -4  -1   18.78    0.99
   0  -4  -1   15.83    0.90
   0  -4  -1   15.77    0.94
   0  -4  -1   16.32    1.36
   0  -4  -1   19.02    0.93
   0  -4  -1   16.29    0.91
   0  -4   1   16.73    0.76
   0  -4  -1   16.80    1.01
   0  -4  -1   15.01    1.01
   0   4   1   15.62    0.96
   0   4   1   17.32    0.96
   0   4   1   16.21    1.00
   0   4   1   15.64    0.92
   0   4   1   17.06    1.33
   0   4  -1   16.57    0.76
   0   4   1   17.50    0.87
   0   4   1   16.37    1.03
   0   4   1   15.97    0.87
   0   4   1   15.79    0.84
   0   4   1   15.19    0.95
  -1  -4  -1  157.60    8.18
  -1  -4  -1  179.76    7.78
  -1  -4  -1  158.23    7.62
  -1  -4  -1  175.11    7.63
  -1  -4  -1  168.72    7.57
   1  -4   1  171.43    7.42
   1  -4   1  171.24    7.60
   1  -4   1  171.49    7.43
  -1  -4  -1  180.63    7.70
   1  -4   1  161.18    7.58
  -1  -4  -1  160.79    7.84
  -1  -4  -1  166.59    7.82
  -1  -4  -1  160.27    7.86
  -1  -4  -1  175.86    8.08
  -1   4  -1  162.75    7.42
   1   4   1  164.94    7.66
   1   4   1  167.07    7.83
   1   4   1  173.90    8.22
   1   4   1  168.48    8.18
   1   4   1  163.64    7.92
   1   4   1  161.30    7.63
   1   4   1  171.15    7.64
  -1   4  -1  170.82    7.60
   1   4   1  178.29    7.87
   1   4   1  169.12    7.69
   1   4   1  166.97    7.84
   1   4   1  177.28    7.59
   2  -4   1    0.32    0.09
   2  -4   1    0.08    0.13
  -2  -4  -1    0.33    0.39
   2  -4   1    0.14    0.17
   2  -4   1    0.33    0.12
  -2  -4  -1   -0.02    0.19
  -2  -4  -1    0.14    0.21
  -2  -4  -1    0.58    0.35
  -2  -4  -1    0.24    0.23
  -2  -4  -1    0.30    0.28
  -2  -4  -1   -0.04    0.44
   2  -4   1    0.50    0.17
  -2  -4  -1    0.29    0.22
  -2  -4  -1    0.16    0.20
   2  -4   1    0.07    0.08
  -2  -4  -1    1.02    0.42
   2  -4   1    0.25    0.23
  -2  -4  -1   -0.05    0.22
   2  -4   1    0.17    0.27
   2  -4   1    0.33    0.21
  -2  -4  -1    0.04    0.36
   2  -4   1    0.26    0.18
   2  -4   1    0.16    0.33
   2   4   1    0.12    0.21
   2   4   1    0.31    0.30
   2   4   1    0.41    0.33
  -2   4  -1    0.24    0.10
   2   4   1    0.16    0.42
  -2   4  -1    0.28    0.10
   2   4   1    0.59    0.43
  -2   4  -1    0.29    0.16
   2   4   1    0.14    0.32
  -2   4  -1    0.27    0.24
   2   4   1    0.32    0.34
   2   4   1    0.44    0.23
   2   4   1    0.17    0.20
   2   4   1   -0.01    0.42
   2   4   1   -0.02    0.26
  -2   4  -1    0.52    0.18
  -2   4  -1    0.07    0.06
  -3  -4  -1   28.12    2.53
   3  -4   1   25.80    2.01
  -3  -4  -1   26.67    2.34
  -3  -4  -1   30.06    2.05
   3  -4   1   30.48    2.69
  -3  -4  -1   31.79    2.60
  -3  -4  -1   28.40    2.97
   3  -4   1   27.54    1.73
  -3  -4  -1   27.66    1.84
   3  -4   1   28.20    1.80
   3  -4   1   29.65    1.63
   3  -4   1   30.19    1.74
  -3  -4  -1   27.19    1.81
   3  -4   1   24.54    1.89
   3  -4   1   26.52    1.81
   3  -4   1   28.32    1.56
   3  -4   1   28.25    1.66
  -3  -4  -1   26.28    1.74
   3  -4   1   31.13    2.29
  -3  -4  -1   28.27    1.97
   3  -4   1   30.47    1.67
  -3  -4  -1   30.37    1.73
   3   4   1   29.42    2.33
  -3   4  -1   27.58    1.52
  -3   4  -1   30.61    1.65
  -3   4  -1   28.24    2.06
   3   4   1   28.01    2.36
  -3   4  -1   28.55    1.81
   3   4   1   33.23    2.99
   3   4   1   26.55    1.90
   3   4   1   29.34    2.21
  -3   4  -1   26.67    1.59
   3   4   1   32.58    3.11
   3   4   1   26.46    2.33
   3   4   1   30.63    1.86
  -3   4  -1   30.10    1.67
   3   4   1   29.29    1.85
   3   4   1   27.61    1.72
  -4  -4  -1   17.50    1.27
   4  -4   1   24.29    3.16
  -4  -4  -1   15.63    1.31
   4  -4   1   13.83    1.33
  -4  -4  -1   16.50    2.19
   4  -4   1   19.93    1.43
   4  -4   1   16.89    1.18
  -4  -4  -1   28.45    3.67
  -4  -4  -1   15.25    1.54
  -4  -4  -1   15.76    1.44
   4  -4   1   17.25    1.44
   4  -4   1   16.26    2.40
  -4  -4  -1   25.15    2.45
   4  -4   1   24.56    2.18
   4  -4   1   17.28    1.39
  -4  -4  -1   17.27    1.80
  -4  -4  -1   27.11    2.51
  -4  -4  -1   15.05    1.31
   4  -4   1   14.96    1.38
   4  -4   1   15.12    1.20
   4   4   1   13.15    2.12
  -4   4  -1   15.57    1.34
  -4   4  -1   14.10    1.06
   4   4   1   12.89    2.54
  -4   4  -1   13.79    1.20
   4   4   1   15.50    1.25
   4   4   1   28.96    3.73
   4   4   1   16.21    1.39
   4   4   1   14.08    1.49
   4   4   1   14.30    2.00
  -4   4  -1   16.30    1.17
  -4   4  -1   15.24    1.16
  -4   4  -1   13.45    0.77
   4   4   1   17.04    1.41
   5  -4   1    3.66    0.89
  -5  -4  -1    3.29    1.25
  -5  -4  -1    3.10    0.75
  -5  -4  -1    5.83    2.02
  -5  -4  -1    3.83    0.92
  -5  -4  -1    3.95    0.86
   5  -4   1    4.59    1.35
   5  -4   1    3.46    0.80
   5  -4   1    4.64    0.92
   5  -4   1    3.41    0.86
   5  -4   1    3.52    1.23
  -5  -4  -1    4.64    0.85
  -5  -4  -1    2.48    1.12
   5  -4   1    2.83    0.77
   5  -4   1    3.44    0.94
   5  -4   1    4.98    1.66
   5  -4   1    5.46    0.81
  -5  -4  -1    5.02    0.84
   5  -4   1    3.82    1.62
  -5  -4  -1    4.27    1.23
  -5  -4  -1    4.82    1.08
  -5   4  -1    1.44    0.63
  -5   4  -1    3.19    0.38
  -5   4  -1    3.04    1.06
   5   4   1    4.21    0.85
   5   4   1    5.03    1.47
   5   4   1    5.57    1.58
   5   4   1    2.33    0.77
   5   4   1    3.78    1.18
   5   4   1    3.88    1.23
   5   4   1    0.72    0.79
  -5   4  -1    3.54    0.67
  -5   4  -1    4.16    0.79
   5   4   1    1.59    1.24
  -5   4  -1    3.96    0.66
   5   4   1    3.53    0.84
   5   4   1    4.45    0.80
  -6  -4  -1    5.67    1.28
   6  -4   1    6.53    1.78
  -6  -4  -1    5.38    1.59
   6  -4   1   11.06    2.84
  -6  -4  -1    8.45    2.51
   6  -4   1    3.75    1.26
  -6  -4  -1    6.34    1.07
   6  -4   1    5.45    1.13
  -6  -4  -1    4.09    0.89
   6  -4   1    3.44    0.78
   6  -4   1    5.04    1.08
   6  -4   1    5.00    1.18
   6  -4   1    4.49    1.10
  -6  -4  -1    4.42    0.93
   6  -4   1   10.94    2.28
  -6  -4  -1    4.40    1.35
  -6  -4  -1    3.92    0.88
   6  -4   1    3.86    1.90
   6  -4   1    4.44    1.14
  -6   4  -1    4.43    0.48
   6   4   1    7.15    1.88
   6   4   1   10.50    2.22
  -6   4  -1    6.74    1.65
  -6   4  -1    5.87    1.14
   6   4   1    4.88    1.02
   6   4   1    3.00    1.87
   6   4   1    5.12    1.18
   6   4   1    3.73    1.34
  -6   4  -1    5.13    0.91
   6   4   1    4.65    1.07
  -6   4  -1    4.66    0.80
   6   4   1    5.64    1.01
   6   4   1    5.72    1.86
   7  -4   1    9.90    2.44
   7  -4   1   11.32    3.23
  -7  -4  -1   11.18    3.24
   7  -4   1   10.59    1.79
  -7  -4  -1   14.59    1.79
   7  -4   1   12.65    1.81
  -7  -4  -1   12.59    1.58
  -7  -4  -1   14.11    2.43
   7  -4   1   11.27    2.63
   7  -4   1    9.64    1.62
  -7  -4  -1   10.97    1.47
  -7  -4  -1    9.67    2.15
   7  -4   1   13.80    2.36
  -7  -4  -1   11.06    2.30
  -7  -4  -1   12.04    1.83
   7  -4   1   15.46    1.70
   7  -4   1   11.41    3.41
   7  -4   1   12.35    2.63
  -7  -4  -1   12.55    1.68
  -7   4  -1    9.82    1.37
   7   4   1   11.56    2.53
   7   4   1   11.07    2.76
   7   4   1   11.47    3.43
  -7   4  -1   11.39    0.69
   7   4   1   12.37    1.80
   7   4   1    9.43    1.63
   7   4   1   12.95    2.67
   7   4   1   11.65    2.59
   7   4   1   14.31    1.97
   7   4   1   12.23    1.62
  -7   4  -1   11.54    1.34
   8  -4   1   40.87    4.13
   8  -4   1   36.64    6.68
   8  -4   1   37.16    3.01
  -8  -4  -1   38.18    3.88
   8  -4   1   32.60    3.07
  -8  -4  -1   39.85    3.13
  -8  -4  -1   34.89    2.79
   8  -4   1   33.10    4.94
  -8  -4  -1   35.10    2.70
   8  -4   1   27.70    4.61
  -8  -4  -1   42.78    3.91
   8  -4   1   30.80    4.84
   8  -4   1   29.35    5.76
   8  -4   1   38.60    2.73
   8  -4   1   31.28    2.85
   8   4   1   34.09    4.89
   8   4   1   31.59    6.27
   8   4   1   35.82    6.92
  -8   4  -1   38.11    2.48
   8   4   1   38.05    3.20
   8   4   1   37.63    4.96
   8   4   1   39.01    2.81
   8   4   1   35.90    3.02
   8   4   1   34.07    4.91
  -8   4  -1   39.55    2.73
   8   4   1   35.70    2.97
   8   4   1   30.17    5.14
  -9  -4  -1   18.75    2.32
   9  -4   1   18.29    2.53
  -9  -4  -1   19.34    2.30
   9  -4   1   18.55    2.72
   9  -4   1   20.85    2.74
   9  -4   1   15.84    3.49
   9  -4   1   20.23    2.33
   9   4   1   16.62    2.28
   9   4   1   20.11    2.82
  -9   4  -1   18.81    1.75
   9   4   1   18.36    2.58
  -9   4  -1   21.36    2.32
   9   4   1   18.43    2.58
  10  -4   1   18.60    2.38
 -10  -4  -1   17.66    2.34
  10  -4   1   12.64    2.43
 -10  -4  -1   13.89    2.14
  10  -4   1   12.35    2.20
  10   4   1   19.54    2.76
 -10   4  -1   14.41    2.07
  10   4   1   12.61    2.41
  10   4   1   16.60    2.34
  11  -4   1   11.00    2.38
  11  -4   1   10.81    2.43
 -11  -4  -1   12.13    2.08
 -11  -4  -1   10.14    1.93
  11  -4   1   14.14    2.55
 -11   4  -1   10.10    1.86
  11   4   1   11.19    2.43
  11   4   1   11.02    2.19
 -12  -5   1    2.59    1.28
  12  -5  -1    5.12    1.79
 -12  -5   1    4.84    1.60
 -12   5   1    2.32    1.19
  12   5  -1    3.41    1.50
  12   5  -1    3.46    1.65
  11  -5  -1   -0.11    0.72
 -11  -5   1    0.11    0.77
  11  -5  -1    0.69    1.05
  11  -5  -1    0.36    0.91
 -11  -5   1    0.73    0.85
  11   5  -1    1.79    1.02
 -11   5   1    0.71    0.81
  11   5  -1    0.09    1.00
  11   5  -1    0.84    1.06
  10  -5  -1    0.94    0.78
 -10  -5   1    2.27    1.07
  10  -5  -1    1.90    1.07
 -10  -5   1   -0.53    0.62
  10  -5  -1    0.19    0.79
  10   5  -1    0.69    0.65
  10   5  -1    1.55    1.12
 -10   5   1    0.58    0.70
  10   5  -1    1.63    1.09
   9  -5  -1    3.46    2.92
   9  -5  -1    2.88    0.94
   9  -5  -1    4.93    2.62
   9  -5  -1    3.51    1.23
   9  -5  -1    2.09    1.17
  -9  -5   1    2.71    1.05
  -9  -5   1    3.34    0.96
   9  -5  -1    3.09    1.22
   9  -5  -1    3.05    1.87
   9   5  -1    3.28    1.20
   9   5  -1    4.26    1.32
   9   5  -1    5.32    1.23
  -9   5   1    2.76    0.97
   9   5  -1    2.66    1.29
  -9   5   1    2.50    0.80
  -8  -5   1    5.41    1.89
   8  -5  -1    4.77    1.36
   8  -5  -1    4.69    2.37
  -8  -5   1    4.59    1.72
  -8  -5   1    4.50    1.42
   8  -5  -1    4.77    2.77
   8  -5  -1    4.22    1.21
   8  -5  -1    5.09    1.33
   8  -5  -1    3.83    1.88
  -8  -5   1    4.76    2.92
  -8  -5   1    4.83    1.20
   8  -5  -1    4.31    1.02
   8  -5  -1    4.88    1.94
   8  -5  -1    5.12    2.02
  -8  -5   1    7.21    2.14
  -8  -5   1    4.96    1.19
  -8  -5   1    4.69    1.09
   8  -5  -1    7.79    2.45
   8   5  -1    4.08    1.05
   8   5  -1    2.86    1.58
   8   5  -1    5.05    1.89
  -8   5   1    4.65    0.47
  -8   5   1    3.75    0.89
  -8   5   1    3.73    0.40
   8   5  -1    6.67    1.47
   8   5  -1    5.71    3.05
  -8   5   1    4.43    1.02
   8   5  -1    6.30    1.54
   8   5  -1    4.16    2.32
   8   5  -1    7.28    2.46
   8   5  -1    5.83    1.27
   8   5  -1    2.72    1.82
   7  -5  -1    2.48    1.02
   7  -5  -1    7.51    2.54
  -7  -5   1    2.07    0.73
  -7  -5   1    1.71    0.76
  -7  -5   1    2.43    0.78
   7  -5  -1    1.71    1.12
   7  -5  -1    1.67    0.64
   7  -5  -1    0.30    1.37
  -7  -5   1    2.52    1.30
   7  -5  -1    1.77    1.20
   7  -5  -1    6.78    2.01
   7  -5  -1    1.91    0.83
  -7  -5   1    2.25    0.82
   7  -5  -1    7.12    2.00
  -7  -5   1    1.62    1.01
  -7  -5   1    4.93    1.61
   7  -5  -1    2.42    0.91
  -7  -5   1    6.36    2.46
  -7   5   1    1.36    0.37
   7   5  -1    0.92    0.69
   7   5  -1    1.67    0.66
   7   5  -1    2.49    2.14
   7   5  -1    1.37    0.82
   7   5  -1    1.54    1.37
   7   5  -1    7.76    2.08
   7   5  -1    6.40    1.81
   7   5  -1    1.68    1.33
  -7   5   1    3.17    0.81
  -7   5   1    1.94    0.65
   7   5  -1    7.27    2.61
   7   5  -1    2.16    0.93
   6  -5  -1    2.62    1.45
  -6  -5   1    1.44    0.61
   6  -5  -1    1.21    1.02
  -6  -5   1    0.73    0.96
   6  -5  -1    2.30    1.20
   6  -5  -1    1.14    0.50
   6  -5  -1    1.42    0.76
  -6  -5   1    1.04    0.65
   6  -5  -1    0.96    1.18
   6  -5  -1    1.10    0.61
   6  -5  -1    1.37    0.89
   6  -5  -1    1.34    0.91
  -6  -5   1    1.51    0.64
  -6  -5   1    1.81    1.38
  -6  -5   1    2.16    1.14
  -6  -5   1    2.52    0.99
  -6  -5   1    0.59    0.52
  -6  -5   1    1.08    1.01
   6  -5  -1    1.66    0.72
  -6   5   1    1.52    0.90
   6   5  -1    0.68    0.63
   6   5  -1    0.82    0.65
  -6   5   1    2.72    0.82
  -6   5   1    1.57    0.58
  -6   5   1    1.10    0.60
  -6   5   1    1.29    0.23
   6   5  -1    1.44    0.65
   6   5  -1    1.60    1.03
  -6   5   1    1.23    0.37
   6   5  -1    0.79    1.26
  -6   5   1    1.10    0.22
   6   5  -1    1.43    0.53
   6   5  -1    1.13    1.36
   6   5  -1    1.53    1.08
  -6   5   1    0.92    0.46
   6   5  -1    2.09    1.46
   6   5  -1    1.83    1.02
   5  -5  -1    9.92    1.35
  -5  -5   1   11.95    2.63
  -5  -5   1   11.27    2.16
  -5  -5   1    8.29    1.41
  -5  -5   1   11.93    2.47
   5  -5  -1   12.53    2.61
  -5  -5   1   11.23    2.16
   5  -5  -1   11.39    1.38
   5  -5  -1    8.90    2.46
   5  -5  -1   11.67    1.50
  -5  -5   1    9.35    1.64
  -5  -5   1    9.95    1.25
   5  -5  -1    9.47    1.79
  -5  -5   1    8.23    1.09
  -5  -5   1    9.63    1.35
  -5  -5   1   13.32    1.70
   5  -5  -1   15.77    2.33
   5  -5  -1   13.88    2.19
   5  -5  -1    9.44    1.09
   5  -5  -1    7.92    1.45
  -5   5   1    9.36    0.60
   5   5  -1   14.44    2.22
  -5   5   1    9.46    0.78
   5   5  -1   11.38    2.58
   5   5  -1   10.55    1.36
   5   5  -1    9.92    2.12
   5   5  -1    9.00    1.27
   5   5  -1    5.75    2.20
   5   5  -1   11.69    2.12
  -5   5   1   10.94    1.43
   5   5  -1   11.46    1.30
   5   5  -1    7.04    1.88
   5   5  -1    8.69    1.27
  -5   5   1   10.41    1.42
  -5   5   1   13.89    1.99
  -5   5   1    8.84    1.29
  -5   5   1   10.50    1.18
  -5   5   1    9.31    0.63
  -5   5   1    9.26    1.03
  -4  -5   1   20.88    1.92
   4  -5  -1   18.72    3.05
  -4  -5   1   18.20    2.60
  -4  -5   1   21.19    3.29
   4  -5  -1   20.44    1.51
  -4  -5   1   23.11    1.84
  -4  -5   1   23.00    2.20
  -4  -5   1   15.25    2.39
   4  -5  -1   22.46    2.03
   4  -5  -1   21.63    1.72
  -4  -5   1   22.15    1.50
   4  -5  -1   21.61    2.01
  -4  -5   1   24.90    3.35
  -4  -5   1   20.10    1.61
   4  -5  -1   19.85    1.38
   4  -5  -1   22.52    1.74
   4  -5  -1   20.82    2.00
   4  -5  -1   19.27    2.84
   4  -5  -1   22.93    1.67
  -4  -5   1   23.74    1.62
   4   5  -1   18.99    1.55
   4   5  -1   19.11    2.45
   4   5  -1   19.52    1.45
   4   5  -1   19.03    2.42
   4   5  -1   17.75    2.98
  -4   5   1   23.19    1.77
  -4   5   1   19.85    1.66
  -4   5   1   23.51    1.47
  -4   5   1   21.02    1.35
   4   5  -1   20.23    3.47
  -4   5   1   20.70    1.11
   4   5  -1   24.13    1.69
  -4   5   1   21.46    1.21
   4   5  -1   21.11    2.89
  -4   5   1   25.55    1.74
   4   5  -1   20.46    2.65
  -4   5   1   20.55    1.95
  -4   5   1   20.75    1.41
   4   5  -1   19.25    1.54
  -3  -5   1    0.29    0.32
   3  -5  -1    2.32    0.85
   3  -5  -1    0.79    0.35
   3  -5  -1    0.40    0.29
   3  -5  -1    0.13    0.52
   3  -5  -1    1.76    0.51
   3  -5  -1    0.28    0.22
   3  -5  -1    0.06    0.24
  -3  -5   1    0.23    0.26
  -3  -5   1   -0.01    0.28
   3  -5  -1    0.27    0.26
   3  -5  -1    1.07    0.42
  -3  -5   1    0.13    0.32
   3  -5  -1    0.25    0.23
  -3  -5   1    2.41    0.88
   3  -5  -1    0.15    0.27
   3  -5  -1    0.05    0.19
  -3  -5   1    0.20    0.42
  -3  -5   1    0.28    0.25
  -3  -5   1    2.42    0.84
  -3  -5   1    1.13    0.88
   3   5  -1    1.43    0.58
  -3   5   1    0.42    0.30
   3   5  -1    0.50    0.28
  -3   5   1    1.32    0.46
   3   5  -1    0.21    0.73
  -3   5   1    0.18    0.21
  -3   5   1   -0.05    0.27
   3   5  -1    2.66    1.07
  -3   5   1   -0.02    0.15
   3   5  -1    2.87    0.79
   3   5  -1   -0.09    0.24
  -3   5   1    0.20    0.27
   3   5  -1    0.70    0.31
   3   5  -1    0.40    0.22
  -3   5   1    0.41    0.25
   3   5  -1   -0.34    0.38
   3   5  -1    0.44    0.59
   3   5  -1   -0.33    0.35
  -3   5   1    0.05    0.20
   3   5  -1    0.65    0.37
  -2  -5   1    0.95    0.76
   2  -5  -1    1.20    0.27
   2  -5  -1    0.96    0.19
   2  -5  -1    1.04    0.26
   2  -5  -1    1.11    0.16
  -2  -5   1    1.34    0.37
   2  -5  -1    1.36    0.30
  -2  -5   1    1.42    0.43
  -2  -5   1    0.52    0.47
  -2  -5   1    0.89    0.30
   2  -5  -1    0.98    0.38
   2  -5  -1    0.93    0.14
   2  -5  -1    0.74    0.33
   2  -5  -1    1.22    0.25
   2  -5  -1    1.26    0.32
  -2  -5   1    1.20    0.69
   2  -5  -1    0.83    0.22
  -2  -5   1    0.84    0.45
  -2  -5   1    0.52    0.52
   2  -5  -1    0.62    0.37
  -2  -5   1    1.48    0.33
  -2  -5   1    1.37    0.33
   2  -5  -1    0.46    0.51
   2  -5  -1    1.71    0.30
  -2  -5   1    1.79    0.61
   2   5  -1    1.32    0.32
  -2   5   1    1.25    0.22
   2   5  -1    0.93    0.39
   2   5  -1    1.25    0.32
  -2   5   1    0.89    0.25
   2   5  -1    1.58    0.36
  -2   5   1    1.37    0.25
   2   5  -1    1.19    0.27
   2   5  -1    1.27    0.44
  -2   5   1    1.20    0.40
   2   5  -1    0.85    0.73
  -2   5   1    0.75    0.33
   2   5  -1    0.82    0.51
   2   5  -1    1.18    0.39
   2   5  -1    0.72    0.52
   2   5  -1    0.66    0.32
   2   5  -1    0.92    0.63
  -2   5   1    1.00    0.26
  -2   5   1    1.05    0.31
  -1  -5   1    3.56    0.38
  -1  -5   1    3.50    0.43
  -1  -5   1    4.45    0.37
   1  -5  -1    4.06    0.53
   1  -5  -1    3.75    0.37
   1  -5  -1    4.31    0.35
  -1  -5   1    3.12    0.46
  -1  -5   1    4.15    0.63
  -1  -5   1    4.60    0.43
   1  -5  -1    4.31    0.33
   1  -5  -1    3.93    0.52
   1  -5  -1    4.15    0.35
  -1  -5   1    4.02    0.37
   1  -5  -1    3.73    0.75
  -1  -5   1    3.31    0.87
  -1  -5   1    3.55    0.35
   1  -5  -1    4.05    0.33
  -1   5   1    4.19    0.31
   1   5  -1    4.16    0.35
  -1   5   1    3.64    0.38
   1   5  -1    3.69    0.81
  -1   5   1    3.47    0.50
   1   5  -1    4.08    0.35
   1   5  -1    4.37    0.39
   1   5  -1    4.28    0.31
  -1   5   1    3.84    0.24
   1   5  -1    5.28    0.40
  -1   5   1    4.10    0.53
   1   5  -1    4.21    0.61
   0  -5  -1   29.36    1.41
   0  -5  -1   26.73    1.96
   0  -5   1   27.47    1.28
   0  -5  -1   25.62    1.44
   0  -5  -1   24.84    1.38
   0  -5  -1   25.62    1.35
   0  -5  -1   29.95    1.59
   0  -5  -1   29.51    1.51
   0  -5   1   28.75    1.26
   0  -5  -1   25.62    1.57
   0  -5  -1   26.40    1.48
   0  -5   1   27.08    1.26
   0  -5  -1   30.32    1.56
   0  -5  -1   28.08    1.42
   0   5  -1   27.54    1.26
   0   5   1   29.34    1.55
   0   5   1   26.55    1.85
   0   5   1   28.87    1.50
   0   5   1   27.57    1.43
   0   5   1   27.14    1.61
   0   5   1   28.40    1.37
   0   5   1   29.21    1.37
  -1  -5  -1   35.78    1.89
  -1  -5  -1   36.25    1.84
  -1  -5  -1   33.20    1.76
  -1  -5  -1   36.41    2.07
   1  -5   1   35.34    1.83
  -1  -5  -1   35.30    2.04
   1  -5   1   34.55    1.60
  -1  -5  -1   32.73    1.96
  -1  -5  -1   39.65    2.46
  -1  -5  -1   35.14    1.96
   1  -5   1   34.25    1.79
  -1  -5  -1   33.05    2.04
   1  -5   1   33.89    1.60
  -1  -5  -1   36.60    2.29
  -1  -5  -1   38.10    1.89
   1   5   1   35.45    2.39
  -1   5  -1   33.21    1.59
   1   5   1   31.89    2.03
   1   5   1   33.68    1.84
   1   5   1   35.89    1.88
   1   5   1   34.86    2.00
   1   5   1   34.76    2.01
   1   5   1   33.68    2.14
   1   5   1   35.77    1.84
  -1   5  -1   35.19    1.83
   1   5   1   34.20    1.78
   1   5   1   33.34    1.78
   1   5   1   38.29    2.39
  -2  -5  -1    1.50    0.82
  -2  -5  -1    2.53    0.44
  -2  -5  -1    3.17    0.58
   2  -5   1    2.12    0.45
  -2  -5  -1    2.99    0.64
   2  -5   1    2.83    0.36
   2  -5   1    2.75    0.39
  -2  -5  -1    3.33    0.79
   2  -5   1    2.93    0.49
  -2  -5  -1    2.81    0.49
   2  -5   1    3.04    0.37
   2  -5   1    1.94    0.50
  -2  -5  -1    2.93    0.57
  -2  -5  -1    2.64    0.45
   2  -5   1    2.91    0.34
  -2  -5  -1    2.17    0.69
   2  -5   1    2.27    0.34
  -2  -5  -1    2.70    0.50
   2   5   1    3.57    0.71
   2   5   1    2.53    0.71
  -2   5  -1    2.74    0.35
   2   5   1    2.88    0.65
  -2   5  -1    2.94    0.36
   2   5   1    2.57    0.46
   2   5   1    2.77    0.90
   2   5   1    3.04    0.55
   2   5   1    2.82    0.86
   2   5   1    3.29    0.75
  -2   5  -1    2.59    0.46
   2   5   1    2.82    0.56
   2   5   1    3.39    0.52
   2   5   1    2.58    0.51
  -3  -5  -1   63.87    3.72
  -3  -5  -1   65.11    4.26
   3  -5   1   79.42    3.69
  -3  -5  -1   63.43    3.47
   3  -5   1   59.39    3.14
  -3  -5  -1   57.35    3.49
   3  -5   1   80.34    4.59
   3  -5   1   59.36    3.44
   3  -5   1   62.12    3.42
   3  -5   1   60.56    3.26
  -3  -5  -1   61.11    3.31
   3  -5   1   65.13    3.21
  -3  -5  -1   61.95    3.64
   3  -5   1   61.98    3.22
  -3  -5  -1   83.97    4.61
   3  -5   1   77.48    3.46
  -3  -5  -1   81.83    5.32
  -3  -5  -1   57.86    3.36
  -3  -5  -1   80.34    4.62
   3  -5   1   61.70    3.79
   3  -5   1   58.71    3.07
   3  -5   1   62.86    3.28
   3   5   1   82.06    4.32
   3   5   1   60.53    3.94
   3   5   1   65.28    4.79
  -3   5  -1   60.07    3.39
   3   5   1   58.50    4.10
   3   5   1   63.31    3.45
  -3   5  -1   77.01    3.42
  -3   5  -1   62.12    3.04
   3   5   1   82.28    4.22
  -3   5  -1   66.22    3.22
   3   5   1   62.45    3.37
  -3   5  -1   65.91    3.13
  -3   5  -1   60.02    3.18
  -3   5  -1   61.18    3.02
   4  -5   1    3.01    0.68
   4  -5   1    3.64    0.59
  -4  -5  -1    3.29    0.68
   4  -5   1    3.15    0.67
  -4  -5  -1    4.24    0.96
  -4  -5  -1    3.92    1.52
  -4  -5  -1    2.87    0.59
  -4  -5  -1    2.88    0.73
   4  -5   1    3.16    0.73
  -4  -5  -1    3.26    0.74
  -4  -5  -1    4.25    1.30
  -4  -5  -1    4.85    1.37
   4  -5   1    3.85    0.72
   4  -5   1    3.05    0.89
   4  -5   1    3.21    0.92
  -4  -5  -1    4.44    0.78
   4  -5   1    3.92    1.22
   4  -5   1    3.30    0.55
   4  -5   1    2.75    1.20
   4  -5   1    2.74    0.61
  -4  -5  -1    3.45    1.08
  -4   5  -1    2.22    0.49
   4   5   1    4.78    1.63
   4   5   1    2.44    0.55
   4   5   1    3.48    1.10
   4   5   1    2.87    0.72
  -4   5  -1    3.66    0.73
  -4   5  -1    2.81    0.52
  -4   5  -1    3.71    0.52
  -4   5  -1    3.45    0.82
   4   5   1    3.96    1.15
   4   5   1    3.46    1.44
   4   5   1    3.21    0.98
   4   5   1    3.04    0.96
   4   5   1    4.25    0.84
  -4   5  -1    4.75    0.67
  -5  -5  -1    9.13    1.23
   5  -5   1    7.76    0.99
   5  -5   1    5.68    1.08
  -5  -5  -1    9.48    1.37
  -5  -5  -1    9.22    1.15
   5  -5   1    6.08    1.22
   5  -5   1    9.31    1.29
  -5  -5  -1   10.11    1.92
   5  -5   1   11.86    2.06
  -5  -5  -1    8.56    1.43
  -5  -5  -1   10.69    2.69
  -5  -5  -1    8.43    1.90
   5  -5   1    8.33    1.80
  -5  -5  -1    8.27    1.28
   5  -5   1    9.35    1.23
  -5  -5  -1   12.90    2.31
   5  -5   1    9.05    1.33
  -5  -5  -1    9.16    1.27
   5  -5   1    7.94    2.06
   5  -5   1   13.03    2.61
   5  -5   1    7.61    1.23
   5   5   1    8.15    1.73
   5   5   1    9.01    1.29
   5   5   1    7.29    2.24
  -5   5  -1   11.50    1.76
   5   5   1    9.14    1.28
  -5   5  -1    7.76    1.00
  -5   5  -1    7.74    0.88
  -5   5  -1    8.25    0.92
   5   5   1   10.82    1.98
  -5   5  -1    9.20    1.28
   5   5   1    7.64    1.08
   5   5   1    7.70    1.89
   5   5   1   12.08    2.78
   5   5   1    8.10    1.24
   5   5   1    8.18    1.81
   6  -5   1    0.82    0.72
   6  -5   1    0.53    0.53
  -6  -5  -1    0.13    0.61
   6  -5   1    0.95    0.47
  -6  -5  -1    0.79    0.81
  -6  -5  -1    0.98    0.84
   6  -5   1    2.58    1.59
   6  -5   1    1.89    0.79
   6  -5   1    0.87    0.72
  -6  -5  -1    2.93    1.24
   6  -5   1    0.34    0.62
  -6  -5  -1    0.43    0.43
   6  -5   1    0.89    1.13
  -6  -5  -1    1.06    0.62
  -6  -5  -1    0.86    0.50
   6  -5   1    1.73    1.11
   6  -5   1    1.16    0.66
  -6  -5  -1    0.14    0.43
  -6  -5  -1    2.91    1.73
   6  -5   1    1.81    1.08
   6   5   1    2.59    1.58
   6   5   1    1.47    1.03
   6   5   1    1.22    0.63
   6   5   1    1.14    0.96
  -6   5  -1    0.69    0.48
   6   5   1    0.41    0.55
  -6   5  -1    0.71    0.60
   6   5   1   -0.02    0.42
  -6   5  -1    0.35    0.35
   6   5   1    0.72    0.92
   6   5   1    0.22    0.69
   6   5   1    0.09    0.84
   6   5   1    0.31    1.19
  -7  -5  -1    0.84    1.34
  -7  -5  -1    0.75    1.00
  -7  -5  -1    0.14    0.68
  -7  -5  -1    0.68    0.72
   7  -5   1   -1.20    1.04
  -7  -5  -1   -0.19    0.39
   7  -5   1    0.06    0.89
   7  -5   1   -0.66    0.52
   7  -5   1    0.47    0.65
  -7  -5  -1    0.17    0.51
   7  -5   1    0.17    0.95
   7  -5   1    0.37    0.46
   7  -5   1    0.46    0.59
   7  -5   1    0.82    0.90
   7  -5   1   -0.23    1.26
  -7  -5  -1    0.14    0.84
  -7  -5  -1    0.04    0.40
  -7  -5  -1    0.77    0.56
   7  -5   1    0.61    0.71
   7   5   1   -1.28    0.89
   7   5   1    0.75    0.88
   7   5   1   -0.28    1.10
   7   5   1    0.92    0.51
  -7   5  -1    1.03    0.55
  -7   5  -1    0.18    0.36
   7   5   1   -0.09    0.91
   7   5   1   -0.31    0.78
   7   5   1   -0.08    0.91
   7   5   1    1.10    0.79
   7   5   1    0.16    0.56
   7   5   1    0.08    0.57
  -8  -5  -1    2.85    0.92
   8  -5   1    1.88    0.86
   8  -5   1    1.42    0.69
   8  -5   1    1.92    1.00
   8  -5   1    2.57    1.40
   8  -5   1    1.39    1.35
  -8  -5  -1    1.32    1.21
  -8  -5  -1    2.38    1.23
   8  -5   1    1.45    1.37
   8  -5   1    2.24    2.04
   8  -5   1    2.04    0.97
  -8  -5  -1    1.22    1.15
   8  -5   1    1.05    1.48
  -8  -5  -1    1.74    0.75
   8  -5   1    3.30    2.33
  -8  -5  -1    1.87    1.05
  -8  -5  -1    3.08    1.01
   8   5   1    0.68    1.55
  -8   5  -1    1.28    0.69
   8   5   1    1.07    0.84
  -8   5  -1    1.74    0.65
   8   5   1    2.69    1.04
   8   5   1    1.86    0.80
   8   5   1    2.58    1.53
   8   5   1    1.90    1.46
   8   5   1    0.70    0.89
   8   5   1    2.72    1.57
   9  -5   1    6.56    1.74
   9  -5   1    9.36    1.56
   9  -5   1    9.87    5.91
  -9  -5  -1    7.87    1.58
   9  -5   1    6.97    1.66
   9  -5   1    6.31    2.25
  -9  -5  -1    7.68    1.47
   9  -5   1    6.45    1.57
   9   5   1    8.70    1.62
   9   5   1    6.00    1.68
   9   5   1    8.13    1.68
  -9   5  -1    7.55    1.40
   9   5   1    8.08    1.73
  10  -5   1    0.53    0.65
 -10  -5  -1    0.80    0.84
 -10  -5  -1    1.40    0.89
  10  -5   1    1.60    1.23
  10  -5   1    1.17    1.00
 -10   5  -1    1.67    0.91
  10   5   1    2.50    1.20
  10   5   1    1.14    0.83
  11  -5   1    1.42    1.16
 -11  -5  -1    0.76    0.89
 -11  -5  -1    0.34    0.96
  11  -5   1    1.66    1.13
 -11   5  -1    0.99    0.82
  11   5   1   -0.01    0.98
  11   5   1    0.26    0.91
 -12  -6   1    1.58    1.10
 -12  -6   1    3.06    1.67
  12  -6  -1    3.03    1.50
  12   6  -1    2.26    1.28
  12   6  -1    2.01    1.40
 -12   6   1    0.54    0.97
  11  -6  -1    1.95    1.23
  11  -6  -1    2.79    1.34
  11  -6  -1    0.20    0.86
 -11  -6   1   -0.22    0.89
 -11  -6   1    1.49    0.98
  11   6  -1    1.14    0.89
 -11   6   1    1.20    0.93
  11   6  -1   -0.46    0.93
 -10  -6   1    1.11    0.88
  10  -6  -1    0.99    0.94
  10  -6  -1    1.05    0.87
  10  -6  -1    0.04    0.61
 -10  -6   1   -0.02    0.70
  10   6  -1   -0.53    0.75
 -10   6   1   -0.46    0.63
  10   6  -1   -0.13    0.61
  10   6  -1    0.50    0.93
   9  -6  -1    0.88    0.68
   9  -6  -1    1.93    1.01
   9  -6  -1    2.10    2.45
  -9  -6   1    1.02    0.80
   9  -6  -1    0.87    0.89
   9  -6  -1   -0.37    1.30
   9  -6  -1    0.71    0.92
  -9  -6   1    1.19    0.84
   9  -6  -1    0.54    1.44
   9   6  -1    0.87    0.86
  -9   6   1    0.46    0.66
  -9   6   1    0.65    0.62
   9   6  -1    1.27    0.66
   9   6  -1    0.82    0.85
   9   6  -1    0.20    0.92
   8  -6  -1   27.77    4.70
  -8  -6   1   25.37    2.16
   8  -6  -1   24.87    5.73
   8  -6  -1   24.75    4.23
   8  -6  -1   28.46    2.52
  -8  -6   1   24.00    3.91
   8  -6  -1   21.38    2.75
  -8  -6   1   18.95    2.37
   8  -6  -1   21.61    1.97
   8  -6  -1   24.77    4.20
  -8  -6   1   24.45    4.02
  -8  -6   1   25.47    2.46
   8  -6  -1   21.02    4.54
  -8  -6   1   25.18    3.95
   8  -6  -1   24.76    3.95
   8  -6  -1   23.26    2.76
  -8  -6   1   27.06    3.19
   8   6  -1   25.57    2.98
   8   6  -1   27.49    2.90
   8   6  -1   30.24    5.55
   8   6  -1   27.04    4.51
   8   6  -1   21.58    3.56
   8   6  -1   21.95    6.48
   8   6  -1   25.22    3.75
  -8   6   1   23.50    1.85
   8   6  -1   23.75    2.49
   8   6  -1   21.30    4.27
   8   6  -1   22.26    3.71
  -8   6   1   24.18    2.05
   8   6  -1   23.35    2.76
   7  -6  -1   10.19    1.67
  -7  -6   1    8.42    1.43
   7  -6  -1    8.81    2.42
   7  -6  -1    7.15    1.39
   7  -6  -1   10.24    1.36
  -7  -6   1    6.36    2.03
   7  -6  -1    8.99    2.03
   7  -6  -1    8.22    1.54
   7  -6  -1    4.04    2.04
  -7  -6   1    6.30    1.30
  -7  -6   1    9.08    1.36
  -7  -6   1   12.34    2.78
  -7  -6   1    7.02    2.68
  -7  -6   1   10.36    2.52
  -7  -6   1   11.58    1.86
   7  -6  -1    8.98    2.32
   7  -6  -1    8.60    3.04
   7  -6  -1    5.19    1.86
  -7  -6   1   10.28    1.92
  -7   6   1    7.87    1.22
   7   6  -1    8.96    2.90
   7   6  -1    9.59    2.18
   7   6  -1    8.16    1.52
   7   6  -1   10.83    3.63
   7   6  -1    6.00    2.06
   7   6  -1    8.49    2.29
  -7   6   1    8.24    1.13
   7   6  -1    9.88    1.65
   7   6  -1    7.59    1.42
   7   6  -1    4.32    1.96
   7   6  -1    8.82    1.35
   6  -6  -1   50.27    3.52
   6  -6  -1   54.04    4.59
   6  -6  -1   59.10    3.55
  -6  -6   1   51.60    3.26
  -6  -6   1   52.44    4.73
   6  -6  -1   56.00    3.22
  -6  -6   1   49.58    5.47
  -6  -6   1   54.35    4.81
   6  -6  -1   51.81    5.33
  -6  -6   1   58.21    3.72
  -6  -6   1   58.28    3.51
  -6  -6   1   58.66    5.12
   6  -6  -1   53.86    3.67
   6  -6  -1   47.45    4.37
  -6  -6   1   73.52    4.38
   6  -6  -1   51.77    5.76
   6  -6  -1   54.60    4.15
   6  -6  -1   51.52    4.53
  -6  -6   1   63.96    4.05
  -6   6   1   57.56    4.16
   6   6  -1   50.34    3.44
   6   6  -1   56.10    3.56
   6   6  -1   52.63    4.39
  -6   6   1   57.94    3.29
   6   6  -1   59.56    5.79
   6   6  -1   56.04    6.23
   6   6  -1   54.47    3.33
  -6   6   1   58.75    3.12
   6   6  -1   51.35    4.48
   6   6  -1   52.51    4.75
   6   6  -1   47.96    4.91
  -6   6   1   63.57    4.20
   6   6  -1   59.29    3.66
   5  -6  -1   44.97    3.81
  -5  -6   1   51.56    3.08
   5  -6  -1   49.25    3.92
   5  -6  -1   53.73    3.60
  -5  -6   1   44.77    4.90
  -5  -6   1   55.46    3.38
   5  -6  -1   48.12    4.95
   5  -6  -1   56.54    3.38
  -5  -6   1   54.60    4.50
  -5  -6   1   61.40    5.06
   5  -6  -1   50.21    4.71
   5  -6  -1   53.30    3.20
   5  -6  -1   56.64    3.47
  -5  -6   1   59.02    3.71
   5  -6  -1   44.96    3.84
   5  -6  -1   54.96    3.02
  -5  -6   1   55.99    4.55
  -5  -6   1   53.34    3.22
  -5  -6   1   56.12    3.97
  -5  -6   1   54.99    3.62
   5   6  -1   54.09    5.59
   5   6  -1   49.69    4.55
  -5   6   1   61.68    3.48
  -5   6   1   61.00    3.35
   5   6  -1   54.71    3.28
   5   6  -1   57.33    3.37
  -5   6   1   58.33    2.93
   5   6  -1   54.49    3.13
   5   6  -1   55.28    3.31
   5   6  -1   46.82    4.21
   5   6  -1   56.63    4.14
   5   6  -1   58.18    5.27
  -5   6   1   57.45    3.45
  -5   6   1   53.79    3.71
   5   6  -1   48.18    4.05
  -5   6   1   52.21    3.03
  -4  -6   1  128.74    7.42
   4  -6  -1  122.51    6.57
  -4  -6   1  124.53    7.66
  -4  -6   1  138.31    6.62
   4  -6  -1  133.17    7.00
  -4  -6   1  136.55    7.15
  -4  -6   1  139.26    6.84
  -4  -6   1  127.16    6.32
   4  -6  -1  126.22    7.83
   4  -6  -1  123.91    6.86
  -4  -6   1  114.31    8.07
   4  -6  -1  128.54    6.55
  -4  -6   1  135.20    7.84
   4  -6  -1  120.41    8.13
  -4  -6   1  132.27    6.46
  -4  -6   1  126.37    8.51
   4  -6  -1  129.13    6.53
   4  -6  -1  133.54    6.24
   4  -6  -1  133.55    6.37
   4  -6  -1  135.73    7.03
   4   6  -1  125.46    6.50
   4   6  -1  129.77    6.46
   4   6  -1  128.09    7.33
   4   6  -1  135.03    7.16
  -4   6   1  143.47    6.30
   4   6  -1  125.87    7.56
  -4   6   1  131.43    6.55
   4   6  -1  133.33    8.41
  -4   6   1  136.77    6.16
   4   6  -1  132.37    7.22
   4   6  -1  121.40    7.75
  -4   6   1  145.76    6.54
   4   6  -1  126.43    6.45
  -4   6   1  131.47    6.77
   4   6  -1  132.98    8.96
  -4   6   1  139.39    6.67
   4   6  -1  122.89    6.32
  -4   6   1  132.42    6.11
  -4   6   1  130.21    6.26
   3  -6  -1   80.73    4.30
  -3  -6   1   82.98    4.18
   3  -6  -1   83.07    4.31
  -3  -6   1   81.93    4.10
   3  -6  -1   84.85    3.99
  -3  -6   1   83.54    5.83
  -3  -6   1   78.84    5.00
   3  -6  -1   79.73    3.99
   3  -6  -1   84.11    4.07
  -3  -6   1   80.08    5.09
   3  -6  -1   81.23    4.27
   3  -6  -1   85.92    4.05
   3  -6  -1   78.97    4.12
   3  -6  -1   86.79    4.13
   3  -6  -1   68.63    5.14
  -3  -6   1   87.60    4.32
  -3  -6   1   79.24    5.68
   3  -6  -1   81.62    4.96
   3  -6  -1   77.86    4.23
  -3   6   1   82.20    3.87
   3   6  -1   83.55    4.61
   3   6  -1   82.93    4.15
  -3   6   1   86.62    4.04
   3   6  -1   84.32    4.12
   3   6  -1   92.12    4.40
   3   6  -1   76.90    5.87
  -3   6   1   80.84    4.17
   3   6  -1   84.16    4.22
  -3   6   1   89.98    4.15
  -3   6   1   85.96    4.34
  -3   6   1   87.11    3.90
   3   6  -1   79.10    4.69
   3   6  -1   86.94    5.64
   3   6  -1   72.60    4.88
  -3   6   1   89.50    4.03
   3   6  -1   86.72    4.64
  -3   6   1   85.21    4.29
   3   6  -1   75.48    5.11
  -2  -6   1  162.58    7.55
  -2  -6   1  150.10    9.04
   2  -6  -1  168.32    7.43
   2  -6  -1  164.42    7.47
   2  -6  -1  169.46    7.50
  -2  -6   1  154.75    8.51
  -2  -6   1  167.68    7.60
  -2  -6   1  153.94    8.32
   2  -6  -1  149.04    8.33
  -2  -6   1  169.05    7.62
  -2  -6   1  171.23    7.75
  -2  -6   1  183.05    8.29
   2  -6  -1  168.49    7.48
  -2  -6   1  179.41    7.72
   2  -6  -1  168.38    7.36
   2  -6  -1  166.29    7.89
   2  -6  -1  156.57    7.32
   2  -6  -1  166.06    7.76
   2  -6  -1  167.10    7.36
   2  -6  -1  171.32    7.51
  -2  -6   1  168.76    8.86
   2  -6  -1  164.82    7.74
  -2  -6   1  165.31    8.08
   2   6  -1  168.75    7.60
  -2   6   1  167.12    7.30
  -2   6   1  155.01    7.30
  -2   6   1  171.83    7.33
  -2   6   1  170.92    7.51
  -2   6   1  162.40    7.74
   2   6  -1  150.84    8.21
   2   6  -1  164.75    7.57
   2   6  -1  167.60    7.59
   2   6  -1  176.05    7.87
  -2   6   1  171.79    7.47
   2   6  -1  169.62    7.76
   2   6  -1  172.76    8.43
  -2   6   1  164.43    7.31
  -2   6   1  169.09    7.75
   2   6  -1  171.41    7.63
   2   6  -1  146.83    8.95
   2   6  -1  173.12    7.61
   2   6  -1  153.24    8.05
   2   6  -1  163.23    7.53
  -1  -6   1   31.75    1.71
  -1  -6   1   29.78    2.45
  -1  -6   1   36.03    1.74
  -1  -6   1   33.64    1.69
   1  -6  -1   32.44    1.87
   1  -6  -1   34.83    1.68
  -1  -6   1   31.33    2.05
   1  -6  -1   33.94    1.63
   1  -6  -1   30.61    1.85
   1  -6  -1   34.94    1.64
   1  -6  -1   27.78    2.10
   1  -6  -1   35.26    1.64
  -1  -6   1   33.67    1.69
   1  -6  -1   35.05    1.69
  -1  -6   1   34.51    1.94
  -1  -6   1   32.93    1.67
  -1   6   1   32.10    1.83
   1   6  -1   35.70    1.71
   1   6  -1   31.00    2.19
  -1   6   1   35.21    1.69
   1   6  -1   34.69    1.68
  -1   6   1   35.19    1.61
   1   6  -1   33.88    1.66
   1   6  -1   33.01    1.57
   1   6  -1   35.59    1.93
   1   6  -1   32.02    1.65
   0  -6  -1   28.36    1.66
   0  -6  -1   26.92    1.39
   0  -6   1   28.76    1.30
   0  -6  -1   30.99    1.61
   0  -6  -1   29.10    1.42
   0  -6  -1   26.38    1.52
   0  -6  -1   27.80    1.59
   0  -6  -1   29.95    1.55
   0  -6  -1   28.63    1.46
   0  -6  -1   26.88    2.04
   0  -6   1   27.87    1.29
   0  -6   1   25.99    1.31
   0   6   1   27.60    1.40
   0   6  -1   27.72    1.30
   0   6   1   28.48    1.37
   0   6   1   27.87    1.68
   0   6   1   27.83    1.56
   0   6   1   26.03    1.85
   0   6   1   26.97    1.53
   0   6   1   29.62    1.44
  -1  -6  -1  189.12    8.40
   1  -6   1  184.24    8.40
  -1  -6  -1  175.22    8.77
   1  -6   1  192.64    8.18
  -1  -6  -1  191.01    9.21
  -1  -6  -1  187.65    8.53
  -1  -6  -1  190.21    9.07
  -1  -6  -1  196.87    8.76
  -1  -6  -1  193.97    8.59
   1  -6   1  189.17    8.18
   1  -6   1  183.46    8.47
  -1  -6  -1  181.40    8.69
  -1  -6  -1  195.40    8.53
  -1  -6  -1  182.12    8.71
  -1  -6  -1  191.67    8.47
   1   6   1  186.54    8.34
   1   6   1  188.81    8.41
   1   6   1  185.04    8.53
   1   6   1  191.86    9.13
   1   6   1  190.22    8.70
   1   6   1  176.55    9.16
   1   6   1  182.10    8.62
  -1   6  -1  180.24    8.16
   1   6   1  186.36    8.87
   1   6   1  189.20    8.51
   1   6   1  187.81    8.44
   1   6   1  184.12    8.43
   1   6   1  173.58    8.69
   2  -6   1   34.89    1.95
  -2  -6  -1   37.20    3.04
  -2  -6  -1   30.17    1.88
   2  -6   1   35.99    1.63
  -2  -6  -1   30.11    2.50
  -2  -6  -1   33.36    1.84
  -2  -6  -1   36.70    2.21
  -2  -6  -1   36.81    2.09
   2  -6   1   33.78    1.70
   2  -6   1   34.00    1.69
  -2  -6  -1   35.06    2.17
   2  -6   1   29.25    1.83
   2  -6   1   31.69    1.91
  -2  -6  -1   31.61    2.30
  -2  -6  -1   32.56    2.38
   2  -6   1   33.87    1.69
   2   6   1   31.75    2.78
   2   6   1   34.78    2.38
  -2   6  -1   34.71    1.70
  -2   6  -1   33.87    1.92
   2   6   1   33.05    2.17
   2   6   1   35.65    1.89
   2   6   1   32.77    1.93
   2   6   1   34.50    1.92
   2   6   1   32.74    2.20
   2   6   1   33.60    2.48
   2   6   1   36.52    2.71
  -2   6  -1   34.46    1.70
   2   6   1   38.22    2.15
   3  -6   1    1.27    0.64
  -3  -6  -1    1.18    0.82
  -3  -6  -1    0.03    0.34
   3  -6   1    0.50    0.23
  -3  -6  -1    0.03    0.18
   3  -6   1    0.40    0.10
   3  -6   1    0.46    0.16
  -3  -6  -1    0.43    0.32
  -3  -6  -1    0.12    0.28
   3  -6   1    0.65    0.28
  -3  -6  -1    0.01    0.39
  -3  -6  -1    1.27    0.74
   3  -6   1    0.20    0.26
   3  -6   1    0.57    0.25
   3  -6   1    0.92    0.39
   3  -6   1    0.09    0.29
  -3  -6  -1    0.16    0.42
  -3  -6  -1    0.87    0.58
   3  -6   1    0.80    0.23
  -3  -6  -1    0.29    0.28
   3  -6   1    0.15    0.29
   3   6   1    0.76    0.39
   3   6   1    0.13    0.36
   3   6   1    0.43    0.51
   3   6   1    0.55    0.47
   3   6   1    0.67    0.31
  -3   6  -1    0.53    0.24
   3   6   1   -0.19    0.52
  -3   6  -1    0.33    0.21
  -3   6  -1    0.32    0.32
   3   6   1    0.86    0.51
   3   6   1    0.80    0.72
   4  -6   1   20.44    2.90
  -4  -6  -1   18.51    2.51
  -4  -6  -1   20.94    1.88
  -4  -6  -1   21.60    1.66
  -4  -6  -1   17.72    1.72
  -4  -6  -1   23.44    3.54
  -4  -6  -1   19.63    1.53
   4  -6   1   21.77    1.59
   4  -6   1   20.57    1.65
  -4  -6  -1   18.56    1.62
   4  -6   1   20.13    2.22
   4  -6   1   19.45    1.77
   4  -6   1   19.47    1.34
   4  -6   1   18.40    1.84
   4  -6   1   20.50    1.48
  -4  -6  -1   22.10    2.96
  -4  -6  -1   20.51    1.49
  -4  -6  -1   20.06    2.75
   4  -6   1   19.51    1.31
   4  -6   1   19.43    1.50
   4  -6   1   19.28    1.58
  -4   6  -1   22.18    1.21
  -4   6  -1   21.51    1.37
   4   6   1   20.49    2.77
   4   6   1   21.08    3.38
  -4   6  -1   21.61    1.51
  -4   6  -1   21.43    1.17
  -4   6  -1   21.50    1.61
  -4   6  -1   21.25    1.39
   4   6   1   20.50    2.51
   4   6   1   20.13    1.52
   4   6   1   17.10    2.34
  -4   6  -1   21.25    1.28
   4   6   1   23.05    2.17
   4   6   1   18.76    1.58
  -5  -6  -1    0.41    0.68
  -5  -6  -1    0.31    0.36
   5  -6   1    0.28    0.43
   5  -6   1    0.26    0.57
   5  -6   1    0.56    0.36
  -5  -6  -1    0.70    0.52
   5  -6   1    0.70    0.48
   5  -6   1    0.73    0.53
  -5  -6  -1    1.43    0.90
  -5  -6  -1    0.37    0.99
   5  -6   1    0.83    0.85
  -5  -6  -1    0.04    0.37
  -5  -6  -1    0.48    0.65
   5  -6   1   -0.53    0.60
  -5  -6  -1    0.55    0.47
   5  -6   1    0.54    0.65
  -5  -6  -1    0.28    0.38
   5  -6   1   -0.15    0.36
   5  -6   1    0.52    0.37
   5  -6   1    0.48    0.52
  -5  -6  -1    0.34    0.63
   5   6   1    0.38    0.73
  -5   6  -1    0.21    0.37
  -5   6  -1    0.05    0.44
  -5   6  -1    0.71    0.30
   5   6   1    0.53    0.48
  -5   6  -1   -0.01    0.39
   5   6   1   -0.21    0.36
   5   6   1    0.08    0.56
   5   6   1    0.93    0.67
   5   6   1    0.31    0.54
  -5   6  -1    0.54    0.38
   5   6   1    0.49    0.65
  -5   6  -1    0.47    0.28
   5   6   1   -0.58    0.71
   5   6   1    0.39    0.39
  -6  -6  -1   13.28    2.60
   6  -6   1   14.30    2.55
   6  -6   1   11.23    1.66
   6  -6   1    9.50    2.63
   6  -6   1   12.03    1.70
   6  -6   1   11.21    1.98
   6  -6   1   12.50    1.64
  -6  -6  -1   13.41    1.94
  -6  -6  -1   12.12    1.57
   6  -6   1   13.18    3.05
  -6  -6  -1   11.07    2.96
  -6  -6  -1   13.07    1.73
   6  -6   1   10.72    1.65
  -6  -6  -1   12.27    2.31
   6  -6   1   10.49    1.28
   6  -6   1   15.45    2.70
  -6  -6  -1   11.35    1.56
   6  -6   1   13.64    1.72
  -6  -6  -1    9.86    2.23
  -6  -6  -1   13.81    1.56
  -6   6  -1   11.55    1.01
   6   6   1   12.10    1.70
   6   6   1   13.26    1.79
   6   6   1   14.25    1.76
   6   6   1   16.60    3.56
   6   6   1   13.33    2.81
   6   6   1   13.89    3.50
   6   6   1   13.29    2.59
  -6   6  -1   12.16    1.37
   6   6   1   11.16    2.19
  -6   6  -1   12.33    1.67
   6   6   1   16.85    2.76
   6   6   1   10.83    1.47
   7  -6   1   35.91    3.80
   7  -6   1   40.09    3.16
  -7  -6  -1   40.39    3.78
  -7  -6  -1   37.46    2.67
  -7  -6  -1   34.35    4.49
   7  -6   1   37.06    2.85
   7  -6   1   33.73    5.52
  -7  -6  -1   39.38    2.92
   7  -6   1   38.79    6.14
  -7  -6  -1   39.50    4.09
  -7  -6  -1   37.21    3.20
   7  -6   1   37.62    3.38
   7  -6   1   36.00    3.02
  -7  -6  -1   41.04    2.82
  -7  -6  -1   38.41    6.05
   7  -6   1   37.93    2.90
   7  -6   1   31.32    4.38
   7  -6   1   36.48    2.55
   7  -6   1   33.43    4.52
  -7  -6  -1   32.46    2.67
   7   6   1   39.87    3.97
   7   6   1   39.12    2.93
   7   6   1   33.68    6.14
   7   6   1   33.41    4.98
   7   6   1   36.80    4.81
  -7   6  -1   37.60    2.57
   7   6   1   38.86    2.74
  -7   6  -1   38.30    2.29
   7   6   1   41.35    4.09
   7   6   1   38.12    2.94
   7   6   1   52.85    6.94
   7   6   1   34.90    2.94
  -8  -6  -1   11.82    1.67
  -8  -6  -1   11.87    2.69
   8  -6   1   15.21    3.44
   8  -6   1   15.53    3.34
  -8  -6  -1   11.84    2.70
  -8  -6  -1   11.17    1.74
   8  -6   1    9.86    1.91
  -8  -6  -1   11.84    2.48
   8  -6   1   12.27    2.62
   8  -6   1   11.65    3.82
   8  -6   1   15.61    4.12
   8  -6   1   14.83    1.82
   8  -6   1    8.63    2.56
   8  -6   1   16.15    2.24
   8  -6   1   13.73    2.01
  -8  -6  -1   13.28    1.92
  -8  -6  -1   13.53    2.17
   8   6   1   17.73    3.25
   8   6   1   12.59    2.03
   8   6   1   12.33    1.96
   8   6   1   13.54    2.91
  -8   6  -1   12.22    1.32
   8   6   1   12.44    1.81
   8   6   1   11.63    2.00
  -8   6  -1   10.63    1.56
  -9  -6  -1   26.68    2.95
   9  -6   1   20.78    2.83
  -9  -6  -1   26.82    2.78
   9  -6   1   27.70    4.40
   9  -6   1   31.36    6.98
   9  -6   1   27.83    2.38
   9  -6   1   25.25    3.20
   9  -6   1   17.29    4.26
   9  -6   1   34.38    3.49
   9   6   1   30.49    3.08
   9   6   1   22.08    3.06
  -9   6  -1   26.42    2.29
   9   6   1   24.94    3.07
 -10  -6  -1   39.44    3.18
  10  -6   1   37.40    3.99
  10  -6   1   36.88    3.49
 -10  -6  -1   38.49    3.23
  10  -6   1   38.51    3.04
  10   6   1   36.78    3.77
 -10   6  -1   30.17    2.82
  10   6   1   33.32    3.83
 -11  -6  -1   22.81    2.86
  11  -6   1   23.06    3.29
 -11  -6  -1   24.22    3.05
  11  -6   1   26.11    3.91
  11   6   1   25.27    3.30
 -11   6  -1   27.05    2.98
  11   6   1   23.01    3.30
 -12  -7   1    0.92    1.14
 -12  -7   1    0.50    0.89
  12  -7  -1    0.15    1.02
  12   7  -1    0.16    0.96
 -12   7   1    0.35    0.91
  12   7  -1    0.37    1.15
  11  -7  -1    2.17    1.23
  11  -7  -1    1.14    1.14
 -11  -7   1    1.33    1.13
 -11  -7   1    0.92    0.87
  11   7  -1    1.30    1.16
 -11   7   1    0.87    0.79
  11   7  -1    1.47    1.02
 -10  -7   1    0.42    0.80
 -10  -7   1    0.27    0.74
  10  -7  -1    0.35    0.80
  10  -7  -1    0.01    0.63
  10  -7  -1    1.64    1.08
  10   7  -1    1.68    1.08
  10   7  -1    2.30    1.02
 -10   7   1   -0.07    0.74
  -9  -7   1    3.59    1.19
   9  -7  -1    5.79    2.28
   9  -7  -1    5.01    1.47
   9  -7  -1    3.45    1.42
   9  -7  -1    3.93    1.01
   9  -7  -1    2.85    1.25
   9  -7  -1    4.95    2.50
   9  -7  -1    4.05    2.92
  -9  -7   1    4.05    1.13
  -9  -7   1    4.69    1.49
   9   7  -1    3.74    1.11
   9   7  -1    5.55    1.45
   9   7  -1    7.49    1.82
   9   7  -1    4.56    1.39
  -9   7   1    4.13    1.10
  -8  -7   1    3.65    1.84
  -8  -7   1    4.02    1.77
   8  -7  -1    3.71    1.84
   8  -7  -1    2.54    1.14
  -8  -7   1    3.30    1.04
   8  -7  -1    2.62    0.82
   8  -7  -1    0.85    1.64
   8  -7  -1    4.15    2.05
  -8  -7   1    3.56    1.14
   8  -7  -1    3.25    1.12
   8  -7  -1    3.24    1.83
  -8  -7   1    2.14    0.84
   8  -7  -1    1.44    1.29
  -8  -7   1    3.33    1.69
  -8  -7   1    4.06    1.00
   8  -7  -1    1.40    2.03
   8  -7  -1    1.95    0.99
  -8   7   1    2.91    0.73
   8   7  -1    2.55    1.43
   8   7  -1    3.15    1.07
   8   7  -1    2.63    1.07
  -8   7   1    2.04    0.77
   8   7  -1    3.51    2.61
   8   7  -1    3.08    1.56
   8   7  -1    3.44    1.98
   8   7  -1    3.10    1.10
   8   7  -1    3.05    0.93
   8   7  -1    2.12    1.73
   8   7  -1    3.83    1.71
  -7  -7   1    2.20    1.24
  -7  -7   1    0.88    1.02
   7  -7  -1    0.45    0.42
   7  -7  -1    0.79    0.68
  -7  -7   1    0.90    0.72
   7  -7  -1    1.63    1.24
  -7  -7   1    0.24    0.47
   7  -7  -1   -0.02    0.66
   7  -7  -1    2.24    1.72
  -7  -7   1   -0.03    0.48
   7  -7  -1    0.59    0.72
   7  -7  -1    2.38    1.34
  -7  -7   1   -0.33    0.84
  -7  -7   1    0.39    0.97
  -7  -7   1    0.79    1.37
   7  -7  -1   -0.43    1.20
  -7  -7   1    0.17    0.51
   7  -7  -1    0.63    0.70
   7  -7  -1   -0.01    0.76
   7   7  -1    3.85    1.99
   7   7  -1   -0.02    0.84
  -7   7   1    0.47    0.47
   7   7  -1    0.48    0.53
  -7   7   1    0.12    0.37
   7   7  -1    1.12    1.65
   7   7  -1    1.29    1.14
   7   7  -1    1.42    0.81
   7   7  -1    0.42    0.69
   7   7  -1    0.04    0.69
   7   7  -1    0.69    0.65
   7   7  -1   -0.62    0.96
   7   7  -1   -0.17    0.78
   6  -7  -1    7.08    1.80
   6  -7  -1    8.27    1.32
   6  -7  -1    6.61    1.30
  -6  -7   1    8.45    1.62
   6  -7  -1    6.25    1.73
   6  -7  -1    7.71    1.07
   6  -7  -1    6.95    1.80
  -6  -7   1    7.74    1.15
  -6  -7   1    6.61    1.15
   6  -7  -1    7.83    2.63
  -6  -7   1    6.13    1.90
  -6  -7   1    5.61    1.23
   6  -7  -1    4.97    1.13
  -6  -7   1    8.37    2.22
   6  -7  -1    4.72    1.89
  -6  -7   1    6.87    1.93
  -6  -7   1    5.80    1.43
   6  -7  -1    8.48    1.68
  -6  -7   1    7.53    2.54
   6   7  -1    8.25    2.94
   6   7  -1    7.49    1.30
   6   7  -1    6.69    1.09
   6   7  -1    8.03    1.95
   6   7  -1    6.87    2.02
   6   7  -1   10.65    1.51
  -6   7   1    7.67    1.12
   6   7  -1    9.57    2.38
   6   7  -1    8.52    1.83
   6   7  -1    5.27    1.13
  -6   7   1    7.71    0.93
   6   7  -1    7.27    2.36
   6   7  -1    8.77    1.91
  -5  -7   1    9.07    2.46
   5  -7  -1    2.86    0.72
   5  -7  -1    1.46    0.59
  -5  -7   1    0.48    0.61
  -5  -7   1    7.50    1.82
   5  -7  -1    0.47    0.45
   5  -7  -1    1.00    0.53
  -5  -7   1    1.14    0.63
  -5  -7   1    2.04    0.59
   5  -7  -1    3.03    1.51
  -5  -7   1    1.74    0.79
  -5  -7   1    1.45    1.12
   5  -7  -1    1.32    0.70
   5  -7  -1    1.28    0.45
   5  -7  -1    8.59    1.57
   5  -7  -1    8.40    2.02
  -5  -7   1    0.94    0.53
  -5  -7   1    0.41    0.38
  -5   7   1    0.67    0.52
   5   7  -1    7.86    2.15
   5   7  -1    0.85    0.77
   5   7  -1    3.14    0.74
  -5   7   1    0.24    0.28
   5   7  -1    2.16    0.68
   5   7  -1    0.53    0.89
   5   7  -1    1.03    0.47
   5   7  -1    1.40    1.33
   5   7  -1    3.38    0.79
  -5   7   1    1.11    0.40
   5   7  -1    0.49    0.65
   5   7  -1    8.84    1.70
  -5   7   1    0.49    0.36
  -5   7   1    2.97    0.83
  -5   7   1    1.98    0.53
   4  -7  -1    8.98    1.07
  -4  -7   1   10.29    1.97
   4  -7  -1   10.55    0.90
  -4  -7   1   12.60    1.82
  -4  -7   1    9.04    1.85
   4  -7  -1   10.45    2.02
   4  -7  -1   10.83    2.27
   4  -7  -1   10.49    1.29
  -4  -7   1   12.65    1.42
  -4  -7   1   10.84    1.14
   4  -7  -1    9.49    1.33
   4  -7  -1   10.49    1.01
   4  -7  -1   12.35    1.11
  -4  -7   1    9.94    1.18
  -4  -7   1   10.18    2.36
   4  -7  -1   11.39    1.47
  -4  -7   1    8.91    1.70
  -4  -7   1   11.04    1.47
   4  -7  -1   11.07    1.34
   4  -7  -1    9.13    1.34
   4   7  -1   13.06    1.77
  -4   7   1   10.39    1.03
   4   7  -1    9.77    2.21
   4   7  -1   11.69    1.09
   4   7  -1    8.96    1.16
   4   7  -1    9.94    1.63
  -4   7   1   10.91    0.80
   4   7  -1    8.98    1.94
  -4   7   1    7.94    1.15
  -4   7   1   11.28    0.91
   4   7  -1   11.33    1.17
  -4   7   1   11.52    1.38
  -4   7   1   10.63    0.91
   4   7  -1   10.59    1.95
  -4   7   1   11.44    0.78
   4   7  -1    5.19    1.98
   4   7  -1   12.88    1.76
  -4   7   1   10.54    0.92
   3  -7  -1    7.98    0.68
   3  -7  -1    7.75    0.71
   3  -7  -1    7.85    0.76
  -3  -7   1    8.12    1.86
   3  -7  -1    6.27    0.51
  -3  -7   1    7.14    0.86
  -3  -7   1    7.95    1.45
  -3  -7   1    7.05    1.48
   3  -7  -1    5.81    0.88
   3  -7  -1    7.74    0.80
   3  -7  -1    7.80    1.31
   3  -7  -1    6.39    0.58
   3  -7  -1    6.15    1.42
   3  -7  -1    7.38    0.97
  -3  -7   1    8.26    0.86
  -3  -7   1    7.09    0.93
  -3  -7   1    6.35    1.64
   3  -7  -1    6.16    0.76
   3  -7  -1    7.83    0.65
  -3  -7   1    9.66    1.58
  -3   7   1    6.30    0.47
   3   7  -1    7.42    0.83
   3   7  -1    6.67    0.88
   3   7  -1    5.67    1.34
   3   7  -1    7.60    0.84
   3   7  -1    6.90    1.06
   3   7  -1    8.12    1.12
   3   7  -1    7.67    0.99
   3   7  -1    5.27    1.20
  -3   7   1    7.97    0.51
  -3   7   1    6.89    0.95
  -3   7   1    6.54    0.72
  -3   7   1    7.08    0.94
  -3   7   1    6.82    0.51
   3   7  -1    9.55    1.30
  -3   7   1    6.88    0.70
  -3   7   1    7.12    0.54
   3   7  -1    6.82    1.84
   2  -7  -1    4.08    0.29
  -2  -7   1    3.58    1.23
   2  -7  -1    4.64    0.67
  -2  -7   1    5.17    0.57
   2  -7  -1    4.37    0.92
  -2  -7   1    3.53    0.75
   2  -7  -1    3.67    0.62
  -2  -7   1    4.45    1.04
  -2  -7   1    3.82    0.77
  -2  -7   1    4.17    0.76
  -2  -7   1    5.80    0.74
   2  -7  -1    5.50    0.54
  -2  -7   1    3.28    0.58
  -2  -7   1    4.87    0.67
  -2  -7   1    3.78    0.54
   2  -7  -1    4.02    0.45
   2  -7  -1    4.63    0.42
   2  -7  -1    4.33    0.33
   2  -7  -1    4.65    0.51
  -2  -7   1    4.07    0.95
  -2  -7   1    4.91    1.20
   2  -7  -1    4.69    0.69
   2   7  -1    4.04    0.60
  -2   7   1    4.23    0.48
  -2   7   1    4.24    0.65
   2   7  -1    4.74    0.59
   2   7  -1    3.08    0.77
   2   7  -1    2.94    0.62
   2   7  -1    4.57    0.58
   2   7  -1    4.41    0.60
   2   7  -1    4.64    0.96
   2   7  -1    4.99    1.33
   2   7  -1    4.61    0.55
  -2   7   1    3.73    0.63
   2   7  -1    4.28    0.59
   2   7  -1    4.74    0.52
  -2   7   1    5.03    0.48
   1  -7  -1   11.10    0.69
   1  -7  -1   10.42    0.67
  -1  -7   1   11.59    0.75
  -1  -7   1   10.83    0.70
   1  -7  -1   10.57    1.10
  -1  -7   1   10.11    0.67
   1  -7  -1   11.88    0.66
   1  -7  -1   10.86    0.65
  -1  -7   1   10.63    1.55
  -1  -7   1   11.00    1.02
  -1  -7   1   10.51    0.81
   1  -7  -1   11.45    0.92
   1  -7  -1   11.08    0.89
  -1  -7   1   10.31    0.71
  -1   7   1   10.78    0.69
   1   7  -1    8.94    0.64
   1   7  -1   10.12    0.57
   1   7  -1    9.61    0.98
   1   7  -1   10.72    0.71
  -1   7   1   11.11    0.85
   1   7  -1   10.45    0.63
  -1   7   1   11.47    0.63
   1   7  -1   11.18    0.85
   1   7  -1   11.26    0.69
   0  -7  -1   67.82    4.16
   0  -7  -1   80.28    3.64
   0  -7  -1   74.89    3.77
   0  -7   1   75.95    3.30
   0  -7  -1   67.23    3.50
   0  -7  -1   68.70    3.53
   0  -7   1   72.47    3.32
   0  -7  -1   71.38    3.40
   0  -7   1   73.54    3.29
   0  -7  -1   79.73    3.58
   0  -7  -1   75.91    3.47
   0   7   1   75.35    3.33
   0   7   1   76.58    3.38
   0   7   1   69.43    3.55
   0   7   1   68.65    3.68
   0   7   1   82.54    3.44
   0   7  -1   75.51    3.33
   0   7   1   68.55    3.81
   0   7   1   73.57    3.59
  -1  -7  -1   32.00    2.27
  -1  -7  -1   33.20    1.99
   1  -7   1   31.85    1.44
  -1  -7  -1   34.84    1.89
  -1  -7  -1   34.55    2.41
  -1  -7  -1   31.30    1.97
  -1  -7  -1   30.79    1.79
  -1  -7  -1   29.15    1.64
  -1  -7  -1   35.33    1.82
  -1  -7  -1   29.06    1.68
  -1  -7  -1   31.69    2.08
  -1  -7  -1   31.89    1.96
   1  -7   1   29.31    1.76
   1  -7   1   31.97    1.43
   1  -7   1   32.42    1.68
  -1  -7  -1   32.21    1.72
  -1   7  -1   30.93    1.40
   1   7   1   27.24    1.97
   1   7   1   31.03    1.67
   1   7   1   28.94    2.33
  -1   7  -1   30.01    1.41
   1   7   1   33.89    1.84
   1   7   1   32.32    1.78
   1   7   1   32.16    1.70
   1   7   1   32.76    2.30
   1   7   1   29.28    1.78
   1   7   1   28.42    1.83
   1   7   1   32.91    1.90
   2  -7   1   33.47    1.92
   2  -7   1   32.25    1.65
  -2  -7  -1   34.78    2.36
   2  -7   1   33.71    1.65
  -2  -7  -1   35.67    2.71
  -2  -7  -1   32.13    1.90
  -2  -7  -1   36.84    2.38
   2  -7   1   33.64    1.52
   2  -7   1   33.65    1.53
   2  -7   1   31.48    1.92
  -2  -7  -1   32.21    1.83
  -2  -7  -1   30.31    2.12
  -2  -7  -1   39.00    2.23
  -2  -7  -1   30.52    2.31
   2   7   1   31.35    1.89
   2   7   1   32.02    2.35
   2   7   1   32.20    2.60
   2   7   1   31.38    2.85
   2   7   1   31.14    2.45
   2   7   1   31.70    2.15
  -2   7  -1   33.23    1.92
   2   7   1   32.46    1.90
  -2   7  -1   32.28    1.64
   2   7   1   33.58    2.17
   2   7   1   33.41    1.87
  -3  -7  -1   28.13    1.83
   3  -7   1   28.95    1.88
   3  -7   1   29.57    1.60
  -3  -7  -1   29.02    2.13
   3  -7   1   26.38    1.49
   3  -7   1   29.01    1.89
   3  -7   1   28.22    1.65
  -3  -7  -1   29.11    1.76
   3  -7   1   27.06    1.59
   3  -7   1   28.51    1.99
  -3  -7  -1   28.85    2.07
   3  -7   1   26.94    1.39
  -3  -7  -1   27.47    1.87
  -3  -7  -1   28.99    2.23
   3   7   1   38.08    2.48
   3   7   1   31.28    1.91
  -3   7  -1   30.56    1.62
   3   7   1   27.74    2.39
  -3   7  -1   28.85    1.60
   3   7   1   27.41    1.78
   3   7   1   37.60    2.39
   3   7   1   27.30    2.54
  -3   7  -1   27.46    1.83
   3   7   1   27.40    3.00
   4  -7   1   17.47    1.33
   4  -7   1   18.28    1.37
  -4  -7  -1   16.68    1.53
  -4  -7  -1   16.78    1.67
   4  -7   1   16.28    2.52
  -4  -7  -1   18.31    2.62
   4  -7   1   16.90    1.47
  -4  -7  -1   19.78    2.03
   4  -7   1   15.70    1.15
   4  -7   1   17.22    1.48
   4  -7   1   15.03    1.58
  -4  -7  -1   18.36    3.18
  -4  -7  -1   15.27    2.35
   4  -7   1   14.97    2.14
  -4  -7  -1   19.32    1.54
   4  -7   1   15.44    1.55
   4  -7   1   15.93    1.08
  -4  -7  -1   15.22    1.34
   4  -7   1   14.28    1.17
  -4  -7  -1   17.28    1.33
  -4  -7  -1   17.91    2.67
   4   7   1   18.09    1.87
  -4   7  -1   17.09    1.21
  -4   7  -1   17.76    1.44
   4   7   1   16.91    2.64
   4   7   1   13.90    2.84
   4   7   1   15.86    2.32
   4   7   1   18.50    2.69
   4   7   1   20.22    2.03
  -4   7  -1   16.51    1.17
   4   7   1   18.41    1.37
   4   7   1   15.78    1.41
   5  -7   1   15.81    2.80
  -5  -7  -1   20.84    2.06
   5  -7   1   17.31    1.37
   5  -7   1   18.78    1.73
   5  -7   1   21.36    2.21
  -5  -7  -1   18.64    1.84
  -5  -7  -1   21.45    3.76
   5  -7   1   19.60    3.30
   5  -7   1   18.36    1.47
  -5  -7  -1   19.11    1.71
   5  -7   1   17.95    1.89
   5  -7   1   15.55    1.82
  -5  -7  -1   22.84    3.16
  -5  -7  -1   17.65    1.60
  -5  -7  -1   22.02    2.40
  -5  -7  -1   20.35    1.57
  -5  -7  -1   16.98    2.61
  -5  -7  -1   20.37    3.07
   5  -7   1   21.05    1.79
   5  -7   1   22.52    2.76
   5  -7   1   18.59    1.60
   5   7   1   20.51    1.62
   5   7   1   20.46    2.63
  -5   7  -1   19.81    1.95
   5   7   1   21.22    1.75
   5   7   1   16.33    2.58
  -5   7  -1   18.17    1.38
  -5   7  -1   20.94    1.47
  -5   7  -1   18.24    1.12
  -5   7  -1   17.96    1.14
   5   7   1   15.16    3.27
   5   7   1   19.09    1.69
  -5   7  -1   17.59    1.45
   5   7   1   13.35    2.59
   5   7   1   22.78    2.82
  -6  -7  -1    1.27    1.02
   6  -7   1    0.24    0.45
   6  -7   1    1.39    0.77
   6  -7   1    1.49    0.78
   6  -7   1    0.40    0.62
  -6  -7  -1    0.19    0.44
   6  -7   1    0.28    0.56
  -6  -7  -1    0.56    0.47
   6  -7   1   -0.50    0.74
  -6  -7  -1    1.24    1.02
  -6  -7  -1   -0.28    1.08
  -6  -7  -1    0.79    0.54
   6  -7   1    1.04    1.20
   6  -7   1    0.22    0.48
   6  -7   1    0.27    0.72
  -6  -7  -1    0.77    0.80
   6  -7   1    0.62    0.41
  -6  -7  -1    0.93    0.44
  -6  -7  -1    1.15    0.90
   6  -7   1    0.77    0.91
   6   7   1    1.00    0.79
   6   7   1    0.24    0.55
   6   7   1    1.85    1.66
   6   7   1    0.59    0.82
   6   7   1    0.99    1.04
  -6   7  -1    0.43    0.30
  -6   7  -1    1.09    0.48
   6   7   1    0.41    0.82
   6   7   1    0.51    0.45
   6   7   1    1.01    0.90
  -6   7  -1    0.80    0.75
   7  -7   1   13.69    2.79
   7  -7   1   10.00    1.71
  -7  -7  -1   12.63    2.70
   7  -7   1   10.72    1.40
  -7  -7  -1   10.90    2.29
  -7  -7  -1   16.57    3.96
   7  -7   1    9.00    1.80
  -7  -7  -1   10.49    1.58
  -7  -7  -1   10.66    1.57
   7  -7   1   10.54    1.81
  -7  -7  -1   10.29    1.92
   7  -7   1   12.18    3.22
   7  -7   1   10.18    2.26
  -7  -7  -1   12.30    2.69
   7  -7   1   11.26    1.73
  -7  -7  -1    9.80    1.57
   7  -7   1    9.68    1.61
  -7  -7  -1   12.41    1.61
   7  -7   1   10.45    3.20
   7   7   1   11.61    2.71
   7   7   1   14.35    4.20
   7   7   1   11.38    2.42
   7   7   1   12.44    1.68
   7   7   1    9.43    2.71
  -7   7  -1   10.43    1.38
   7   7   1   13.91    1.90
   7   7   1   11.40    2.28
  -7   7  -1   11.50    1.00
   7   7   1    9.45    1.66
   8  -7   1    0.87    1.22
   8  -7   1    2.24    1.63
   8  -7   1   -0.79    1.25
   8  -7   1   -0.38    0.69
  -8  -7  -1    0.33    0.61
   8  -7   1    0.18    0.77
  -8  -7  -1    1.04    1.10
   8  -7   1    0.89    0.75
   8  -7   1    0.70    1.28
  -8  -7  -1   -0.19    0.54
   8  -7   1    0.37    0.65
  -8  -7  -1    0.28    1.08
   8  -7   1    2.04    0.76
   8  -7   1    2.17    1.96
  -8  -7  -1    0.83    0.66
  -8   7  -1    1.21    0.51
  -8   7  -1    1.17    0.63
   8   7   1    0.81    0.89
   8   7   1    0.13    1.07
   8   7   1   -0.59    0.96
   8   7   1    0.23    0.75
   8   7   1    1.06    0.62
   9  -7   1    0.35    1.17
   9  -7   1    0.35    0.87
   9  -7   1    1.14    2.03
  -9  -7  -1    0.74    0.81
   9  -7   1    0.73    0.62
   9  -7   1    1.94    1.39
  -9  -7  -1    2.01    0.90
   9  -7   1    2.53    1.94
   9  -7   1    1.78    0.97
   9   7   1    1.00    0.77
  -9   7  -1    0.57    0.58
   9   7   1    0.66    0.98
   9   7   1    1.64    1.02
  10  -7   1    0.29    1.03
  10  -7   1   -0.39    0.61
 -10  -7  -1    0.83    0.81
 -10  -7  -1    0.72    0.85
  10  -7   1    0.91    0.83
  10   7   1    0.80    0.94
  10   7   1    0.66    0.86
 -10   7  -1    1.86    0.84
 -11  -7  -1    0.76    0.92
 -11  -7  -1    2.96    1.34
  11  -7   1    2.56    1.45
 -11   7  -1    2.29    1.13
  11   7   1    2.40    1.38
  11   7   1    1.23    1.06
  12  -8  -1    2.75    1.50
 -12  -8   1    5.17    1.58
 -12   8   1    3.08    1.26
  12   8  -1    6.42    1.94
 -11  -8   1    0.98    0.78
  11  -8  -1    3.02    1.42
  11  -8  -1    0.68    1.14
 -11   8   1    1.09    0.87
  11   8  -1    0.22    0.80
  11   8  -1    0.71    1.24
 -10  -8   1    0.82    0.84
 -10  -8   1    0.56    0.82
  10  -8  -1   -0.34    0.55
  10  -8  -1    0.93    0.98
  10  -8  -1    0.95    0.96
  10   8  -1    1.37    1.03
 -10   8   1   -0.67    0.64
  10   8  -1   -0.17    0.44
  -9  -8   1    8.37    1.72
   9  -8  -1    8.18    3.66
   9  -8  -1    7.57    4.66
  -9  -8   1    6.83    1.58
   9  -8  -1    8.90    1.83
   9  -8  -1    9.26    2.08
  -9  -8   1    8.40    1.49
   9  -8  -1    7.83    1.36
   9  -8  -1    9.09    1.86
   9  -8  -1    8.77    3.16
   9  -8  -1    3.41    1.91
   9   8  -1    9.24    1.61
  -9   8   1    8.97    1.51
   9   8  -1    5.91    1.63
   9   8  -1    6.05    1.51
   8  -8  -1    2.04    2.36
  -8  -8   1    3.33    1.08
   8  -8  -1    4.87    1.34
   8  -8  -1    7.48    2.74
   8  -8  -1    3.34    0.88
  -8  -8   1    5.40    2.10
  -8  -8   1    4.68    1.09
   8  -8  -1    5.48    1.28
   8  -8  -1    5.54    1.40
  -8  -8   1    2.26    0.94
   8  -8  -1    7.34    2.31
   8  -8  -1    8.06    2.45
   8  -8  -1    3.02    1.58
   8  -8  -1    6.53    2.35
  -8  -8   1    5.09    1.38
   8   8  -1    3.18    1.11
   8   8  -1    6.15    1.91
   8   8  -1    3.47    1.60
  -8   8   1    4.12    0.98
   8   8  -1    6.88    2.12
   8   8  -1    3.86    1.04
   8   8  -1    1.11    2.21
   8   8  -1    3.42    1.23
  -8   8   1    4.90    0.82
  -7  -8   1   24.11    1.96
   7  -8  -1   21.44    2.48
  -7  -8   1   27.09    4.10
   7  -8  -1   15.99    3.70
   7  -8  -1   21.53    2.57
   7  -8  -1   29.51    4.16
   7  -8  -1   21.87    2.38
  -7  -8   1   21.78    2.79
   7  -8  -1   12.89    3.75
   7  -8  -1   19.78    3.38
  -7  -8   1   24.43    2.25
  -7  -8   1   28.32    4.28
   7  -8  -1   17.11    2.78
   7  -8  -1   18.87    3.26
  -7  -8   1   18.62    3.41
   7  -8  -1   23.89    1.83
  -7  -8   1   22.90    4.68
  -7  -8   1   17.93    2.15
   7   8  -1   21.94    1.93
   7   8  -1   18.32    3.66
   7   8  -1   22.25    5.09
   7   8  -1   22.73    3.21
   7   8  -1   23.52    4.58
   7   8  -1   19.78    2.34
   7   8  -1   19.06    3.07
   7   8  -1   26.74    2.66
   7   8  -1   20.55    3.62
  -7   8   1   20.55    1.77
   7   8  -1   22.05    3.34
  -7   8   1   23.77    1.57
   7   8  -1   21.05    2.44
   6  -8  -1   37.68    3.54
  -6  -8   1   40.39    3.03
  -6  -8   1   34.24    4.54
   6  -8  -1   32.19    2.73
  -6  -8   1   33.52    4.63
   6  -8  -1   37.15    2.36
   6  -8  -1   30.50    3.26
  -6  -8   1   36.76    4.61
  -6  -8   1   35.52    2.58
  -6  -8   1   34.31    5.28
   6  -8  -1   27.14    4.90
   6  -8  -1   37.80    2.61
   6  -8  -1   38.86    3.15
   6  -8  -1   37.65    5.23
   6  -8  -1   34.00    3.44
  -6  -8   1   36.07    3.22
   6  -8  -1   39.79    2.84
  -6  -8   1   36.79    3.09
  -6  -8   1   37.90    2.50
   6   8  -1   34.19    5.78
   6   8  -1   37.08    3.35
  -6   8   1   39.48    2.13
   6   8  -1   33.41    2.59
   6   8  -1   33.56    4.31
   6   8  -1   38.01    2.75
   6   8  -1   34.18    3.41
   6   8  -1   41.52    5.63
   6   8  -1   38.58    3.40
   6   8  -1   36.02    2.71
  -6   8   1   36.88    2.39
   6   8  -1   42.82    5.26
   6   8  -1   38.77    2.55
   5  -8  -1   54.33    3.43
  -5  -8   1   49.29    5.14
   5  -8  -1   51.83    3.83
   5  -8  -1   46.02    3.23
  -5  -8   1   60.41    3.49
   5  -8  -1   54.94    2.97
   5  -8  -1   47.99    4.53
   5  -8  -1   40.64    4.61
  -5  -8   1   49.64    3.03
  -5  -8   1   50.50    3.19
  -5  -8   1   57.00    3.72
  -5  -8   1   55.28    5.03
   5  -8  -1   55.90    3.19
  -5  -8   1   46.01    4.31
   5  -8  -1   57.63    3.46
  -5  -8   1   46.27    4.34
   5  -8  -1   54.35    3.86
  -5  -8   1   50.85    4.04
   5  -8  -1   50.50    3.71
   5   8  -1   47.87    5.35
   5   8  -1   53.89    4.43
   5   8  -1   44.66    4.36
  -5   8   1   54.32    3.34
   5   8  -1   51.98    3.25
  -5   8   1   57.45    2.72
   5   8  -1   52.84    3.83
   5   8  -1   51.99    3.10
  -5   8   1   55.52    3.00
   5   8  -1   57.77    3.95
  -5   8   1   57.02    2.83
   5   8  -1   54.41    3.26
  -5   8   1   49.60    3.04
  -5   8   1   55.23    3.43
   5   8  -1   51.63    3.97
  -5   8   1   59.60    2.90
  -5   8   1   53.21    2.99
   5   8  -1   50.27    4.97
   4  -8  -1   60.55    3.12
   4  -8  -1   61.35    3.21
  -4  -8   1   63.37    4.55
  -4  -8   1   59.06    3.23
   4  -8  -1   57.38    4.77
   4  -8  -1   62.10    3.55
   4  -8  -1   58.00    3.58
  -4  -8   1   62.29    3.39
  -4  -8   1   65.59    3.79
   4  -8  -1   59.26    3.30
  -4  -8   1   62.98    5.30
  -4  -8   1   58.45    4.49
  -4  -8   1   58.35    3.47
   4  -8  -1   56.76    3.44
   4  -8  -1   64.34    4.50
  -4  -8   1   58.91    4.07
   4  -8  -1   56.42    3.53
  -4  -8   1   61.13    5.10
   4  -8  -1   60.52    3.24
   4  -8  -1   60.78    3.45
   4   8  -1   54.86    3.30
   4   8  -1   58.70    5.40
  -4   8   1   62.42    3.17
  -4   8   1   61.53    2.90
  -4   8   1   59.96    2.97
   4   8  -1   54.84    4.44
   4   8  -1   59.90    3.80
  -4   8   1   61.02    2.85
   4   8  -1   54.00    4.22
  -4   8   1   60.21    3.46
   4   8  -1   63.48    4.00
  -4   8   1   60.99    3.13
   4   8  -1   58.39    3.32
   4   8  -1   61.41    3.29
   4   8  -1   55.72    3.74
  -4   8   1   59.09    2.83
  -4   8   1   57.97    3.49
   3  -8  -1  117.69    5.21
   3  -8  -1  117.15    5.89
   3  -8  -1  117.06    5.50
   3  -8  -1  110.91    5.21
   3  -8  -1  106.11    6.72
   3  -8  -1  118.02    5.55
  -3  -8   1  117.91    7.45
  -3  -8   1  121.54    6.60
  -3  -8   1  118.18    5.73
  -3  -8   1  116.37    5.61
   3  -8  -1  119.96    5.55
  -3  -8   1  116.96    6.68
  -3  -8   1  110.48    7.48
   3  -8  -1  120.89    5.52
  -3  -8   1  111.48    6.60
  -3  -8   1  116.26    6.91
  -3  -8   1  125.92    5.92
   3  -8  -1  115.73    5.85
   3  -8  -1  125.52    5.56
   3  -8  -1  113.96    6.27
   3  -8  -1  119.46    5.53
  -3   8   1  124.33    5.92
   3   8  -1  118.68    6.81
   3   8  -1  108.77    6.40
   3   8  -1  119.51    5.97
   3   8  -1  126.68    5.95
   3   8  -1  118.78    5.65
  -3   8   1  122.55    5.87
  -3   8   1  123.20    5.55
   3   8  -1  108.64    7.55
   3   8  -1  115.46    6.70
   3   8  -1  115.47    5.70
   3   8  -1  118.81    5.85
   3   8  -1  114.76    5.64
   3   8  -1  115.57    6.05
  -2  -8   1  230.83   10.91
  -2  -8   1  206.25    9.43
   2  -8  -1  196.13    9.45
  -2  -8   1  192.75   11.04
   2  -8  -1  200.74    9.59
   2  -8  -1  211.20    9.23
   2  -8  -1  187.57   10.02
  -2  -8   1  183.15   10.34
  -2  -8   1  211.90    9.36
  -2  -8   1  212.74    9.79
  -2  -8   1  189.37   10.18
  -2  -8   1  214.63    9.92
  -2  -8   1  220.08    9.53
   2  -8  -1  209.02    9.61
   2  -8  -1  214.98    9.30
  -2  -8   1  204.34    9.81
   2  -8  -1  211.33    9.25
   2  -8  -1  201.91    9.25
   2   8  -1  203.82    9.29
  -2   8   1  205.80    9.58
   2   8  -1  202.02    9.45
   2   8  -1  193.44    9.73
   2   8  -1  204.04    9.39
   2   8  -1  207.48    9.39
  -2   8   1  204.17    9.28
   2   8  -1  212.78    9.43
   2   8  -1  204.42    9.35
   2   8  -1  208.86    9.28
   2   8  -1  205.81    9.40
  -2   8   1  212.34    9.62
  -2   8   1  221.99    9.23
   2   8  -1  227.81   10.23
  -1  -8   1   86.96    3.90
   1  -8  -1   82.80    4.23
   1  -8  -1   84.87    3.85
   1  -8  -1   82.36    4.15
   1  -8  -1   89.44    3.85
  -1  -8   1   82.09    4.40
  -1  -8   1   72.40    4.79
   1  -8  -1   90.72    3.94
  -1  -8   1   82.50    3.89
   1  -8  -1   83.61    3.83
   1  -8  -1   84.23    3.92
  -1  -8   1   87.05    3.94
  -1  -8   1   81.70    3.95
  -1  -8   1   88.44    3.86
  -1  -8   1   90.39    3.94
   1  -8  -1   70.11    4.34
   1   8  -1   82.85    3.74
  -1   8   1   81.19    4.09
   1   8  -1   81.98    3.90
   1   8  -1   80.13    3.77
  -1   8   1   89.70    3.83
   1   8  -1   85.10    3.93
  -1   8   1   85.29    3.92
   0  -8  -1   52.63    3.52
   0  -8  -1   52.59    2.77
   0  -8   1   60.97    2.64
   0  -8   1   57.29    2.62
   0  -8  -1   62.55    2.91
   0  -8  -1   64.57    2.99
   0  -8  -1   53.81    2.79
   0  -8   1   55.29    2.66
   0  -8  -1   59.50    3.15
   0  -8  -1   62.42    2.81
   0  -8  -1   56.87    2.73
   0   8   1   55.50    2.93
   0   8  -1   58.75    2.68
   0   8   1   57.36    2.91
   0   8   1   53.21    2.86
   0   8   1   64.10    2.77
   0   8   1   58.98    2.61
   0   8   1   57.81    2.63
   0   8   1   55.88    2.90
  -1  -8  -1   39.77    2.13
  -1  -8  -1   40.74    2.09
  -1  -8  -1   37.29    2.11
  -1  -8  -1   35.60    1.92
  -1  -8  -1   40.87    2.03
  -1  -8  -1   33.84    2.53
   1  -8   1   37.57    2.10
  -1  -8  -1   36.89    2.25
  -1  -8  -1   37.83    2.42
   1  -8   1   35.79    1.93
  -1  -8  -1   36.59    1.98
  -1  -8  -1   37.17    2.71
  -1  -8  -1   36.95    2.25
   1  -8   1   37.76    1.69
   1  -8   1   37.56    1.68
  -1  -8  -1   37.29    2.30
   1   8   1   33.88    2.63
   1   8   1   39.15    2.11
   1   8   1   35.53    2.07
   1   8   1   37.27    1.94
   1   8   1   33.59    2.16
   1   8   1   36.16    2.05
   1   8   1   36.04    2.58
   1   8   1   37.95    1.95
  -2  -8  -1   28.05    2.25
  -2  -8  -1   32.81    2.25
  -2  -8  -1   34.85    2.45
  -2  -8  -1   30.99    1.93
  -2  -8  -1   31.92    2.68
  -2  -8  -1   28.85    2.65
  -2  -8  -1   31.82    2.28
  -2  -8  -1   32.66    1.85
   2  -8   1   35.08    1.66
   2  -8   1   28.87    1.88
  -2  -8  -1   36.61    2.22
   2  -8   1   34.15    1.99
   2  -8   1   34.85    1.65
   2   8   1   32.46    1.91
   2   8   1   32.79    1.94
  -2   8  -1   34.11    1.64
   2   8   1   33.39    2.16
   2   8   1   33.93    1.90
   2   8   1   33.93    2.10
   2   8   1   30.28    1.81
   2   8   1   34.48    2.19
   2   8   1   31.01    2.49
   2   8   1   33.68    2.65
   2   8   1   36.17    3.06
   2   8   1   35.85    2.44
  -2   8  -1   37.82    2.04
  -3  -8  -1    4.39    1.13
   3  -8   1    3.32    0.64
  -3  -8  -1    3.07    1.06
   3  -8   1    3.82    0.71
  -3  -8  -1    6.13    1.67
   3  -8   1    3.53    0.82
   3  -8   1    4.05    0.71
  -3  -8  -1    3.58    1.04
  -3  -8  -1    2.43    0.63
  -3  -8  -1    3.46    0.88
  -3  -8  -1    3.04    0.61
   3  -8   1    3.38    0.25
   3  -8   1    3.49    0.51
  -3  -8  -1    4.07    0.86
   3  -8   1    4.48    0.53
   3  -8   1    4.03    0.50
  -3  -8  -1    3.56    0.62
   3   8   1    3.59    0.80
   3   8   1    3.11    1.06
  -3   8  -1    2.98    0.44
   3   8   1    3.87    0.85
  -3   8  -1    3.44    0.47
   3   8   1    3.70    0.68
   3   8   1    2.45    1.17
   3   8   1    2.78    0.59
  -3   8  -1    3.42    0.65
   3   8   1    3.57    0.99
   3   8   1    2.74    1.00
   4  -8   1    1.30    0.43
   4  -8   1    2.50    0.98
   4  -8   1    0.09    0.15
   4  -8   1   -0.11    0.15
   4  -8   1    0.25    0.39
   4  -8   1    0.29    0.23
  -4  -8  -1   -0.37    0.31
  -4  -8  -1    0.03    0.34
  -4  -8  -1    0.59    0.71
   4  -8   1    0.16    0.29
   4  -8   1   -0.02    0.26
   4  -8   1    0.67    0.59
  -4  -8  -1    2.25    1.24
  -4  -8  -1   -0.07    0.31
  -4  -8  -1    0.06    0.28
   4  -8   1    2.06    0.60
  -4  -8  -1    1.85    0.92
   4  -8   1    0.31    0.36
   4  -8   1    0.18    0.34
  -4  -8  -1    0.18    0.46
  -4  -8  -1    0.28    0.28
  -4  -8  -1    1.12    0.77
   4   8   1    0.52    0.44
   4   8   1    0.71    0.55
  -4   8  -1   -0.01    0.35
   4   8   1    0.17    0.30
  -4   8  -1    0.17    0.28
   4   8   1   -0.04    0.56
   4   8   1    0.46    0.47
   4   8   1    0.18    0.59
   4   8   1    3.11    1.22
   4   8   1    0.25    0.84
  -4   8  -1    0.29    0.26
   5  -8   1    0.38    0.37
   5  -8   1    1.99    1.14
   5  -8   1    0.95    0.55
  -5  -8  -1    2.37    1.48
   5  -8   1    0.42    0.28
  -5  -8  -1    0.63    0.44
   5  -8   1    0.62    0.73
  -5  -8  -1    1.35    1.00
  -5  -8  -1    0.42    0.43
  -5  -8  -1    0.32    0.39
  -5  -8  -1    0.54    0.53
   5  -8   1    3.08    0.96
   5  -8   1    1.15    0.60
   5  -8   1    0.97    0.52
  -5  -8  -1    0.10    0.60
   5  -8   1    0.51    0.35
  -5  -8  -1    0.18    0.43
   5  -8   1    0.34    0.48
  -5  -8  -1    1.85    1.01
  -5  -8  -1    0.39    0.69
   5  -8   1    2.20    0.87
   5   8   1    2.24    1.00
   5   8   1    0.34    0.51
   5   8   1    4.03    1.60
   5   8   1    0.55    0.48
   5   8   1    0.00    0.62
   5   8   1    2.02    0.91
   5   8   1   -0.10    0.94
   5   8   1    0.53    0.42
  -5   8  -1    1.08    0.41
  -5   8  -1   -0.06    0.48
  -5   8  -1    0.65    0.35
   5   8   1    0.89    0.93
  -6  -8  -1   15.11    1.67
  -6  -8  -1   15.78    1.63
   6  -8   1   13.56    1.80
   6  -8   1   17.72    2.35
  -6  -8  -1   16.82    3.72
   6  -8   1   15.64    1.95
  -6  -8  -1   11.42    1.63
  -6  -8  -1   18.35    3.14
   6  -8   1   13.60    2.39
   6  -8   1   16.37    3.30
  -6  -8  -1   15.61    2.91
   6  -8   1   16.61    2.76
  -6  -8  -1   19.51    2.99
   6  -8   1   13.39    1.70
   6  -8   1   11.77    2.92
  -6  -8  -1   16.14    2.10
  -6  -8  -1   16.26    2.26
   6  -8   1   15.50    1.59
   6  -8   1   15.42    1.34
   6  -8   1   12.70    1.81
   6   8   1   21.56    2.96
  -6   8  -1   13.45    0.87
   6   8   1   16.27    1.82
  -6   8  -1   14.71    0.92
   6   8   1   14.77    2.40
   6   8   1   15.91    3.15
   6   8   1   18.94    3.40
  -6   8  -1   14.31    1.50
   6   8   1   13.37    1.82
   6   8   1   13.77    2.72
   6   8   1   16.86    3.85
   6   8   1   14.55    1.86
  -7  -8  -1   41.43    4.53
  -7  -8  -1   49.00    3.33
   7  -8   1   43.45    2.89
   7  -8   1   44.96    6.24
  -7  -8  -1   46.38    3.44
  -7  -8  -1   44.67    3.76
   7  -8   1   51.74    3.83
   7  -8   1   44.79    3.46
  -7  -8  -1   43.35    4.65
   7  -8   1   47.65    3.54
  -7  -8  -1   43.12    3.15
   7  -8   1   42.56    4.41
  -7  -8  -1   51.96    4.53
   7  -8   1   47.95    3.39
  -7  -8  -1   51.10    7.05
  -7  -8  -1   47.13    3.08
   7  -8   1   44.59    3.20
   7  -8   1   45.67    4.58
   7  -8   1   49.78    4.40
   7  -8   1   39.40    6.20
   7   8   1   41.26    3.09
   7   8   1   51.71    4.50
   7   8   1   47.47    3.45
   7   8   1   46.38    5.90
   7   8   1   39.30    6.72
  -7   8  -1   43.08    2.89
   7   8   1   45.88    4.76
   7   8   1   43.47    3.28
  -7   8  -1   47.85    2.39
   7   8   1   51.33    4.36
   8  -8   1   40.45    6.48
  -8  -8  -1   32.31    2.85
  -8  -8  -1   38.58    3.07
   8  -8   1   47.61    5.83
  -8  -8  -1   35.92    2.74
   8  -8   1   39.82    3.90
   8  -8   1   34.36    4.97
   8  -8   1   38.92    5.23
   8  -8   1   31.13    3.06
   8  -8   1   27.03    5.79
   8  -8   1   35.55    2.99
   8  -8   1   35.24    2.59
   8  -8   1   30.92    2.79
   8   8   1   31.66    2.69
  -8   8  -1   32.77    2.50
   8   8   1   40.33    3.23
   8   8   1   37.93    3.97
   8   8   1   32.77    2.90
   8   8   1   41.16    5.01
   9  -8   1   24.66    3.05
   9  -8   1   21.55    2.88
  -9  -8  -1   29.98    3.19
  -9  -8  -1   27.53    2.42
   9  -8   1   27.80    4.46
   9  -8   1   27.60    4.99
   9  -8   1   24.04    6.06
   9  -8   1   24.33    2.62
   9   8   1   28.15    3.46
  -9   8  -1   29.15    2.34
   9   8   1   25.84    3.09
   9   8   1   24.74    2.88
  10  -8   1   33.50    3.68
 -10  -8  -1   27.89    3.22
  10  -8   1   29.36    3.51
 -10  -8  -1   30.77    3.18
  10   8   1   23.77    3.23
  10   8   1   29.84    3.38
 -10   8  -1   31.14    2.60
  11  -8   1   12.61    2.50
 -11  -8  -1   11.83    2.21
 -11  -8  -1    8.96    1.76
  11   8   1    5.06    1.73
 -11   8  -1    8.18    1.69
  11   8   1   14.09    2.53
 -11  -9   1    7.21    1.85
  11  -9  -1    5.10    1.82
 -11  -9   1    6.26    1.54
 -11   9   1    3.66    1.21
  11   9  -1    4.40    1.57
  11   9  -1    4.67    1.52
  10  -9  -1   21.45    2.92
  10  -9  -1   20.41    2.44
 -10  -9   1   18.56    2.69
  10  -9  -1   19.17    2.83
 -10  -9   1   18.58    2.38
 -10   9   1   17.39    2.24
  10   9  -1   15.53    2.57
  10   9  -1   17.79    2.50
   9  -9  -1   26.88    2.27
   9  -9  -1   25.73    3.34
   9  -9  -1   25.12    5.63
  -9  -9   1   30.77    2.70
   9  -9  -1   25.47    3.00
   9  -9  -1   28.54    5.24
   9  -9  -1   32.46    7.20
  -9  -9   1   27.00    2.82
   9  -9  -1   24.76    4.50
   9  -9  -1   28.86    3.27
   9   9  -1   18.93    2.83
  -9   9   1   23.07    2.48
   9   9  -1   23.43    3.02
   9   9  -1   28.25    2.93
   8  -9  -1   29.13    3.33
  -8  -9   1   31.76    2.56
   8  -9  -1   33.22    2.46
  -8  -9   1   34.82    3.19
   8  -9  -1   31.55    2.73
   8  -9  -1   34.41    5.23
   8  -9  -1   37.57    3.05
  -8  -9   1   32.43    2.74
  -8  -9   1   36.74    2.97
   8  -9  -1   29.32    6.12
   8  -9  -1   28.56    4.42
   8  -9  -1   33.48    4.84
   8  -9  -1   26.56    5.21
   8  -9  -1   30.06    4.30
   8   9  -1   33.75    4.24
   8   9  -1   35.41    2.73
   8   9  -1   33.57    4.38
   8   9  -1   36.25    3.76
   8   9  -1   30.22    2.77
  -8   9   1   30.20    2.40
  -8   9   1   36.16    2.60
   8   9  -1   33.29    3.04
  -7  -9   1   23.72    3.92
  -7  -9   1   26.25    2.31
   7  -9  -1   30.93    4.13
   7  -9  -1   26.01    4.69
   7  -9  -1   23.88    3.30
  -7  -9   1   28.34    4.39
  -7  -9   1   29.69    2.25
  -7  -9   1   29.15    5.32
  -7  -9   1   26.87    4.19
  -7  -9   1   28.03    2.84
   7  -9  -1   28.02    2.39
   7  -9  -1   28.80    4.09
   7  -9  -1   25.77    5.14
  -7  -9   1   29.86    2.65
   7  -9  -1   27.36    2.85
   7  -9  -1   27.96    2.59
   7  -9  -1   32.22    4.15
   7  -9  -1   27.85    2.07
   7   9  -1   31.21    3.17
   7   9  -1   27.07    3.54
   7   9  -1   30.65    6.01
   7   9  -1   26.64    2.36
   7   9  -1   28.56    2.27
   7   9  -1   31.59    3.93
   7   9  -1   26.09    2.44
  -7   9   1   27.86    1.68
   7   9  -1   31.26    4.45
   7   9  -1   30.66    4.77
  -7   9   1   24.66    2.05
  -6  -9   1   17.71    3.11
  -6  -9   1   19.54    3.35
   6  -9  -1   14.42    1.75
  -6  -9   1   16.42    3.21
  -6  -9   1   16.40    1.74
  -6  -9   1   15.75    2.19
   6  -9  -1   13.17    1.81
   6  -9  -1   12.82    1.82
  -6  -9   1   14.25    2.16
   6  -9  -1   15.66    2.53
  -6  -9   1   14.80    3.52
   6  -9  -1   12.03    2.27
   6  -9  -1   15.76    1.34
   6  -9  -1   19.77    2.78
   6  -9  -1   16.42    2.18
   6  -9  -1   15.68    3.15
   6  -9  -1   11.28    3.07
  -6  -9   1   14.86    1.77
  -6  -9   1   14.30    2.31
   6   9  -1   14.12    1.76
   6   9  -1   19.21    2.75
   6   9  -1   15.43    3.91
   6   9  -1   13.69    3.03
   6   9  -1   15.99    1.74
  -6   9   1   15.72    1.04
   6   9  -1   14.31    2.81
   6   9  -1   16.40    1.94
   6   9  -1   13.56    2.26
  -6   9   1   16.84    1.41
   6   9  -1   18.22    2.51
   5  -9  -1    2.05    0.64
   5  -9  -1    6.49    1.23
  -5  -9   1   -0.08    0.32
   5  -9  -1    1.53    0.66
   5  -9  -1    2.86    0.82
   5  -9  -1    0.61    0.43
  -5  -9   1   -0.21    0.48
  -5  -9   1    1.32    0.84
   5  -9  -1    0.52    0.56
   5  -9  -1    5.50    1.67
   5  -9  -1    5.19    1.18
  -5  -9   1    0.96    0.74
  -5  -9   1    0.47    0.56
   5  -9  -1    0.62    0.97
  -5  -9   1    4.21    1.35
   5  -9  -1    1.30    0.42
  -5  -9   1    1.93    0.58
  -5  -9   1    0.41    0.50
  -5   9   1    0.86    0.40
[truncated: 5,078,280 more chars]
