# Supplementary material
Source: MDPI journal article supplement (https://www.mdpi.com/2073-4352/11/2/179)
Supplement: s1 [file s1 › 2_rf1615.cif]

 
data_rf1615
 
_audit_creation_method            'SHELXL-2016/6'
_shelx_SHELXL_version_number      '2016/6'
_chemical_name_systematic         ?
_chemical_name_common             '[PrL3(bipy)2]'
_chemical_melting_point           ?
_chemical_formula_moiety          'C62 H40 F9 N4 O6 Pr'
_chemical_formula_sum
 'C62 H40 F9 N4 O6 Pr' 
_chemical_formula_weight          1248.89

loop_
 _atom_type_symbol
 _atom_type_description
 _atom_type_scat_dispersion_real
 _atom_type_scat_dispersion_imag
 _atom_type_scat_source
 'C'  'C'   0.0033   0.0016
 'International Tables Vol C Tables 4.2.6.8 and 6.1.1.4'
 'H'  'H'   0.0000   0.0000
 'International Tables Vol C Tables 4.2.6.8 and 6.1.1.4'
 'N'  'N'   0.0061   0.0033
 'International Tables Vol C Tables 4.2.6.8 and 6.1.1.4'
 'O'  'O'   0.0106   0.0060
 'International Tables Vol C Tables 4.2.6.8 and 6.1.1.4'
 'F'  'F'   0.0171   0.0103
 'International Tables Vol C Tables 4.2.6.8 and 6.1.1.4'
 'Pr'  'Pr'  -0.2180   2.8214
 'International Tables Vol C Tables 4.2.6.8 and 6.1.1.4'
 
_space_group_crystal_system       triclinic
_space_group_IT_number            2
_space_group_name_H-M_alt         'P -1'
_space_group_name_Hall            '-P 1'
 
_shelx_space_group_comment
;
The symmetry employed for this shelxl refinement is uniquely defined
by the following loop, which should always be used as a source of
symmetry information in preference to the above space-group names.
They are only intended as comments.
;
 
loop_
 _space_group_symop_operation_xyz
 'x, y, z'
 '-x, -y, -z'
 
_cell_length_a                    11.9059(4)
_cell_length_b                    15.3694(5)
_cell_length_c                    16.5675(6)
_cell_angle_alpha                 79.097(2)
_cell_angle_beta                  70.308(2)
_cell_angle_gamma                 67.575(2)
_cell_volume                      2632.08(16)
_cell_formula_units_Z             2
_cell_measurement_temperature     100(2)
_cell_measurement_reflns_used     9221
_cell_measurement_theta_min       2.70
_cell_measurement_theta_max       29.75

_exptl_crystal_description        prism
_exptl_crystal_colour             yellow
_exptl_crystal_density_meas       ?
_exptl_crystal_density_method     ?
_exptl_crystal_density_diffrn     1.576          
_exptl_crystal_F_000              1256
_exptl_transmission_factor_min    ?
_exptl_transmission_factor_max    ?
_exptl_crystal_size_max           0.320
_exptl_crystal_size_mid           0.270
_exptl_crystal_size_min           0.220
_exptl_absorpt_coefficient_mu     1.016
_shelx_estimated_absorpt_T_min    0.737
_shelx_estimated_absorpt_T_max    0.807
_exptl_absorpt_correction_type    multi-scan
_exptl_absorpt_correction_T_min   0.7015
_exptl_absorpt_correction_T_max   0.8423
_exptl_absorpt_process_details    'SADABS'
_exptl_absorpt_special_details    ?
_diffrn_ambient_temperature       100(2)
_diffrn_radiation_wavelength      0.71073
_diffrn_radiation_type            MoK\a
_diffrn_source                    ?
_diffrn_measurement_device_type   'Bruker APEX-II CCD'
_diffrn_measurement_method        '\w-scans'
_diffrn_detector_area_resol_mean  ?
_diffrn_reflns_number             95375
_diffrn_reflns_av_unetI/netI      0.0397
_diffrn_reflns_av_R_equivalents   0.0642
_diffrn_reflns_limit_h_min        -15
_diffrn_reflns_limit_h_max        15
_diffrn_reflns_limit_k_min        -19
_diffrn_reflns_limit_k_max        19
_diffrn_reflns_limit_l_min        -21
_diffrn_reflns_limit_l_max        21
_diffrn_reflns_theta_min          2.618
_diffrn_reflns_theta_max          27.000
_diffrn_reflns_theta_full         27.000
_diffrn_measured_fraction_theta_max   0.999
_diffrn_measured_fraction_theta_full  0.999
_diffrn_reflns_Laue_measured_fraction_max    0.999
_diffrn_reflns_Laue_measured_fraction_full   0.999
_diffrn_reflns_point_group_measured_fraction_max   0.999
_diffrn_reflns_point_group_measured_fraction_full  0.999
_reflns_number_total              11469
_reflns_number_gt                 10457
_reflns_threshold_expression      'I > 2\s(I)'
_reflns_Friedel_coverage          0.000
_reflns_Friedel_fraction_max      .
_reflns_Friedel_fraction_full     .
 
_reflns_special_details
;
 Reflections were merged by SHELXL according to the crystal
 class for the calculation of statistics and refinement.
 
 _reflns_Friedel_fraction is defined as the number of unique
 Friedel pairs measured divided by the number that would be
 possible theoretically, ignoring centric projections and
 systematic absences.
;
 
_computing_data_collection        'Bruker APEX2'
_computing_cell_refinement        'Bruker SAINT'
_computing_data_reduction         'Bruker SAINT'
_computing_structure_solution     'SHELXT 2014/4 (Sheldrick, 2014)'
_computing_structure_refinement 'SHELXL-2016/6 (Sheldrick, 2016)'
_computing_molecular_graphics     'Bruker SHELXTL'
_computing_publication_material   'Bruker SHELXTL'
_refine_special_details           ?
_refine_ls_structure_factor_coef  Fsqd
_refine_ls_matrix_type            full
_refine_ls_weighting_scheme       calc
_refine_ls_weighting_details
'w=1/[\s^2^(Fo^2^)+(0.0401P)^2^+1.5451P] where P=(Fo^2^+2Fc^2^)/3'
_atom_sites_solution_primary      ?
_atom_sites_solution_secondary    ?
_atom_sites_solution_hydrogens    geom
_refine_ls_hydrogen_treatment     constr
_refine_ls_extinction_method      none
_refine_ls_extinction_coef        .
_refine_ls_number_reflns          11469
_refine_ls_number_parameters      767
_refine_ls_number_restraints      66
_refine_ls_R_factor_all           0.0318
_refine_ls_R_factor_gt            0.0276
_refine_ls_wR_factor_ref          0.0728
_refine_ls_wR_factor_gt           0.0697
_refine_ls_goodness_of_fit_ref    0.991
_refine_ls_restrained_S_all       1.134
_refine_ls_shift/su_max           0.003
_refine_ls_shift/su_mean          0.000
 
loop_
 _atom_site_label
 _atom_site_type_symbol
 _atom_site_fract_x
 _atom_site_fract_y
 _atom_site_fract_z
 _atom_site_U_iso_or_equiv
 _atom_site_adp_type
 _atom_site_occupancy
 _atom_site_site_symmetry_order  
 _atom_site_calc_flag
 _atom_site_refinement_flags_posn
 _atom_site_refinement_flags_adp
 _atom_site_refinement_flags_occupancy
 _atom_site_disorder_assembly
 _atom_site_disorder_group
Pr1 Pr 0.69910(2) 0.66351(2) 0.23321(2) 0.01117(4) Uani 1 1 d . . . . .
F1 F 0.45297(17) 0.58367(11) 0.07562(11) 0.0423(4) Uani 1 1 d . . . . .
N1 N 0.94101(17) 0.57948(12) 0.12532(12) 0.0169(4) Uani 1 1 d . . . . .
C1 C 0.4596(2) 0.52569(17) 0.14530(15) 0.0233(5) Uani 1 1 d . . . . .
O1 O 0.57865(14) 0.60034(10) 0.17430(10) 0.0171(3) Uani 1 1 d . . . . .
F2 F 0.34929(16) 0.55572(19) 0.20484(13) 0.0716(7) Uani 1 1 d . . . . .
N2 N 0.75355(17) 0.68982(12) 0.05767(11) 0.0155(4) Uani 1 1 d . . . . .
C2 C 0.5688(2) 0.52167(15) 0.17759(13) 0.0163(4) Uani 1 1 d . . . . .
O2 O 0.77114(14) 0.48996(10) 0.24634(9) 0.0162(3) Uani 1 1 d . . . . .
F3 F 0.46999(17) 0.44324(11) 0.12352(12) 0.0443(4) Uani 1 1 d . . . . .
N3 N 0.63553(16) 0.58786(11) 0.40336(11) 0.0138(3) Uani 1 1 d . . . . .
C3 C 0.6389(2) 0.43371(15) 0.20810(14) 0.0185(4) Uani 1 1 d . . . . .
H3 H 0.619055 0.379898 0.206437 0.022 Uiso 1 1 calc R U . . .
O3 O 0.54919(14) 0.81787(10) 0.19663(9) 0.0157(3) Uani 1 1 d . . . . .
F4 F 0.47772(14) 0.98092(11) 0.09900(9) 0.0360(4) Uani 1 1 d . . . . .
N4 N 0.44510(17) 0.68970(12) 0.33543(11) 0.0159(4) Uani 1 1 d . . . . .
C4 C 0.7387(2) 0.42259(14) 0.24145(13) 0.0141(4) Uani 1 1 d . . . . .
O4 O 0.62893(14) 0.77464(10) 0.34351(9) 0.0146(3) Uani 1 1 d . . . . .
O6 O 0.81209(14) 0.77689(10) 0.17181(9) 0.0159(3) Uani 1 1 d . . . . .
F6 F 0.31381(14) 0.94531(10) 0.17473(10) 0.0336(4) Uani 1 1 d . . . . .
C6 C 0.9079(2) 0.31936(15) 0.30624(14) 0.0179(4) Uani 1 1 d . . . . .
H6 H 0.925290 0.374745 0.306381 0.021 Uiso 1 1 calc R U . . .
O5 O 0.86526(14) 0.63582(10) 0.30074(10) 0.0188(3) Uani 1 1 d . . . . .
F5 F 0.35242(15) 1.05501(9) 0.21155(9) 0.0339(4) Uani 1 1 d . . . . .
C5 C 0.81286(19) 0.32620(14) 0.27362(13) 0.0154(4) Uani 1 1 d . . . . .
C9 C 1.1449(2) 0.14008(17) 0.4074(2) 0.0331(6) Uani 1 1 d . . . . .
H9 H 1.209933 0.136180 0.430389 0.040 Uiso 1 1 calc R U . . .
C8 C 1.0768(2) 0.22514(16) 0.37531(17) 0.0265(5) Uani 1 1 d . . . . .
H8 H 1.094173 0.280095 0.377011 0.032 Uiso 1 1 calc R U . . .
C7 C 0.9811(2) 0.23236(15) 0.33974(14) 0.0182(4) Uani 1 1 d . . . . .
C10 C 1.1192(2) 0.05795(16) 0.40644(19) 0.0305(6) Uani 1 1 d . . . . .
H10 H 1.166063 -0.000722 0.429684 0.037 Uiso 1 1 calc R U . . .
C11 C 1.0273(2) 0.06224(16) 0.37235(17) 0.0261(5) Uani 1 1 d . . . . .
H11 H 1.011405 0.006417 0.371455 0.031 Uiso 1 1 calc R U . . .
C12 C 0.9554(2) 0.14959(15) 0.33827(14) 0.0189(5) Uani 1 1 d . . . . .
C13 C 0.8572(2) 0.15821(15) 0.30331(15) 0.0220(5) Uani 1 1 d . . . . .
H13 H 0.839233 0.103500 0.301809 0.026 Uiso 1 1 calc R U . . .
C15 C 0.4082(2) 0.96977(15) 0.17970(14) 0.0199(5) Uani 1 1 d . . . . .
C14 C 0.7886(2) 0.24298(15) 0.27199(14) 0.0193(5) Uani 1 1 d . . . . .
H14 H 0.723882 0.246572 0.248830 0.023 Uiso 1 1 calc R U . . .
C018 C 0.3519(2) 0.74089(15) 0.29955(15) 0.0192(5) Uani 1 1 d . . . . .
H018 H 0.370019 0.741144 0.239117 0.023 Uiso 1 1 calc R U . . .
C18 C 0.54205(19) 0.85045(14) 0.36859(13) 0.0132(4) Uani 1 1 d . . . . .
C17 C 0.4749(2) 0.91655(14) 0.31342(14) 0.0152(4) Uani 1 1 d . . . . .
H17 H 0.420561 0.977388 0.332183 0.018 Uiso 1 1 calc R U . . .
C16 C 0.4869(2) 0.89423(14) 0.23319(13) 0.0148(4) Uani 1 1 d . . . . .
C19 C 0.5081(2) 0.86698(14) 0.46155(13) 0.0136(4) Uani 1 1 d . . . . .
C01R C 0.2308(2) 0.79333(16) 0.34593(16) 0.0230(5) Uani 1 1 d . . . . .
H01R H 0.167714 0.828679 0.317956 0.028 Uiso 1 1 calc R U . . .
C01Y C 0.2041(2) 0.79296(16) 0.43385(16) 0.0232(5) Uani 1 1 d . . . . .
H01Y H 0.122539 0.829345 0.467309 0.028 Uiso 1 1 calc R U . . .
C20 C 0.5775(2) 0.80003(14) 0.51100(13) 0.0148(4) Uani 1 1 d . . . . .
H20 H 0.648211 0.748626 0.484265 0.018 Uiso 1 1 calc R U . . .
C21 C 0.5461(2) 0.80601(14) 0.60054(14) 0.0160(4) Uani 1 1 d . . . . .
C23 C 0.5780(2) 0.74122(17) 0.73943(15) 0.0264(5) Uani 1 1 d . . . . .
H23 H 0.624326 0.693525 0.773396 0.032 Uiso 1 1 calc R U . . .
C22 C 0.6137(2) 0.73545(16) 0.65281(15) 0.0221(5) Uani 1 1 d . . . . .
H22 H 0.684592 0.683621 0.627001 0.026 Uiso 1 1 calc R U . . .
C24 C 0.4726(2) 0.81774(18) 0.77914(15) 0.0256(5) Uani 1 1 d . . . . .
H24 H 0.447542 0.820610 0.839702 0.031 Uiso 1 1 calc R U . . .
C25 C 0.4065(2) 0.88773(16) 0.73057(15) 0.0219(5) Uani 1 1 d . . . . .
H25 H 0.337204 0.939676 0.757604 0.026 Uiso 1 1 calc R U . . .
C27 C 0.3720(2) 0.95296(15) 0.58783(14) 0.0187(4) Uani 1 1 d . . . . .
H27 H 0.302929 1.006029 0.613088 0.022 Uiso 1 1 calc R U . . .
C26 C 0.4405(2) 0.88343(15) 0.64044(14) 0.0172(4) Uani 1 1 d . . . . .
C28 C 0.4042(2) 0.94461(14) 0.50151(14) 0.0167(4) Uani 1 1 d . . . . .
H28 H 0.356354 0.991422 0.467870 0.020 Uiso 1 1 calc R U . . .
C30 C 0.9196(2) 0.68808(19) 0.30860(17) 0.0286(6) Uani 1 1 d . . . . .
C31 C 0.9263(3) 0.7724(2) 0.26466(17) 0.0339(6) Uani 1 1 d . . . . .
H31 H 0.969224 0.804369 0.280524 0.041 Uiso 1 1 calc R U . . .
C32 C 0.8709(2) 0.81347(15) 0.19613(14) 0.0180(4) Uani 1 1 d . . . . .
C33 C 0.8787(2) 0.90683(15) 0.15133(14) 0.0174(4) Uani 1 1 d . . . . .
C34 C 0.8014(2) 0.95272(15) 0.09946(14) 0.0175(4) Uani 1 1 d . . . . .
H34 H 0.749489 0.923119 0.091264 0.021 Uiso 1 1 calc R U . . .
C35 C 0.7972(2) 1.04297(15) 0.05791(14) 0.0182(4) Uani 1 1 d . . . . .
C36 C 0.7166(2) 1.09154(16) 0.00516(14) 0.0218(5) Uani 1 1 d . . . . .
H36 H 0.664123 1.062995 -0.003877 0.026 Uiso 1 1 calc R U . . .
C37 C 0.7140(2) 1.17913(16) -0.03276(16) 0.0261(5) Uani 1 1 d . . . . .
H37 H 0.660045 1.210797 -0.068229 0.031 Uiso 1 1 calc R U . . .
C38 C 0.7908(3) 1.22300(16) -0.01970(16) 0.0284(6) Uani 1 1 d . . . . .
H38 H 0.786998 1.284341 -0.045581 0.034 Uiso 1 1 calc R U . . .
C39 C 0.8704(2) 1.17765(16) 0.02998(16) 0.0254(5) Uani 1 1 d . . . . .
H39 H 0.922491 1.207445 0.037729 0.031 Uiso 1 1 calc R U . . .
C40 C 0.8763(2) 1.08632(15) 0.07020(14) 0.0195(5) Uani 1 1 d . . . . .
C41 C 0.9578(2) 1.03658(16) 0.12191(15) 0.0220(5) Uani 1 1 d . . . . .
H41 H 1.012718 1.064104 0.129051 0.026 Uiso 1 1 calc R U . . .
C42 C 0.9593(2) 0.95001(16) 0.16171(14) 0.0199(5) Uani 1 1 d . . . . .
H42 H 1.014256 0.918414 0.196495 0.024 Uiso 1 1 calc R U . . .
C43 C 0.9768(2) 0.60942(14) 0.04205(14) 0.0165(4) Uani 1 1 d . . . . .
C44 C 1.1037(2) 0.58051(17) -0.00727(15) 0.0244(5) Uani 1 1 d . . . . .
H44 H 1.126811 0.602272 -0.066051 0.029 Uiso 1 1 calc R U . . .
C45 C 1.1958(2) 0.51983(17) 0.03010(16) 0.0263(5) Uani 1 1 d . . . . .
H45 H 1.282913 0.500157 -0.002432 0.032 Uiso 1 1 calc R U . . .
C46 C 1.1595(2) 0.48834(16) 0.11525(16) 0.0227(5) Uani 1 1 d . . . . .
H46 H 1.220576 0.446387 0.142499 0.027 Uiso 1 1 calc R U . . .
C47 C 1.0317(2) 0.51944(15) 0.15987(15) 0.0212(5) Uani 1 1 d . . . . .
H47 H 1.006654 0.497065 0.218317 0.025 Uiso 1 1 calc R U . . .
C48 C 0.8726(2) 0.67282(14) 0.00505(14) 0.0165(4) Uani 1 1 d . . . . .
C49 C 0.8973(2) 0.70956(16) -0.08013(15) 0.0243(5) Uani 1 1 d . . . . .
H49 H 0.982373 0.697598 -0.115601 0.029 Uiso 1 1 calc R U . . .
C50 C 0.7968(3) 0.76367(17) -0.11265(16) 0.0292(6) Uani 1 1 d . . . . .
H50 H 0.811869 0.789815 -0.170379 0.035 Uiso 1 1 calc R U . . .
C51 C 0.6745(2) 0.77887(16) -0.05961(15) 0.0235(5) Uani 1 1 d . . . . .
H51 H 0.603624 0.814508 -0.080357 0.028 Uiso 1 1 calc R U . . .
C52 C 0.6575(2) 0.74102(15) 0.02447(14) 0.0195(5) Uani 1 1 d . . . . .
H52 H 0.573117 0.751884 0.060790 0.023 Uiso 1 1 calc R U . . .
C53 C 0.5195(2) 0.62245(14) 0.45915(13) 0.0145(4) Uani 1 1 d . . . . .
C54 C 0.4950(2) 0.59716(15) 0.54727(14) 0.0189(4) Uani 1 1 d . . . . .
H54 H 0.412262 0.623078 0.585286 0.023 Uiso 1 1 calc R U . . .
C55 C 0.5927(2) 0.53382(15) 0.57856(14) 0.0207(5) Uani 1 1 d . . . . .
H55 H 0.578091 0.515869 0.638271 0.025 Uiso 1 1 calc R U . . .
C56 C 0.7115(2) 0.49728(15) 0.52144(15) 0.0200(5) Uani 1 1 d . . . . .
H56 H 0.779994 0.452919 0.540802 0.024 Uiso 1 1 calc R U . . .
C57 C 0.7285(2) 0.52698(14) 0.43482(14) 0.0174(4) Uani 1 1 d . . . . .
H57 H 0.810838 0.502633 0.395848 0.021 Uiso 1 1 calc R U . . .
C58 C 0.4167(2) 0.68670(14) 0.42148(14) 0.0151(4) Uani 1 1 d . . . . .
C59 C 0.2977(2) 0.73880(15) 0.47254(15) 0.0194(5) Uani 1 1 d . . . . .
H59 H 0.281176 0.737155 0.532950 0.023 Uiso 1 1 calc R U . . .
C29 C 0.9854(3) 0.6487(2) 0.3804(2) 0.0547(10) Uani 1 1 d D . . . .
F9 F 1.1028(6) 0.6058(8) 0.3500(5) 0.074(3) Uani 0.266(7) 1 d D U P A 1
F8 F 0.9836(8) 0.7298(4) 0.4142(4) 0.042(2) Uani 0.266(7) 1 d D U P A 1
F7 F 0.9295(10) 0.6073(6) 0.4486(6) 0.057(3) Uani 0.266(7) 1 d D U P A 1
F7B F 0.9022(3) 0.6415(3) 0.45571(18) 0.0474(9) Uani 0.734(7) 1 d D U P A 2
F8B F 1.0623(5) 0.6876(3) 0.3840(3) 0.0927(15) Uani 0.734(7) 1 d D U P A 2
F9B F 1.0653(3) 0.5543(2) 0.3640(2) 0.0683(11) Uani 0.734(7) 1 d D U P A 2
 
loop_
 _atom_site_aniso_label
 _atom_site_aniso_U_11
 _atom_site_aniso_U_22
 _atom_site_aniso_U_33
 _atom_site_aniso_U_23
 _atom_site_aniso_U_13
 _atom_site_aniso_U_12
Pr1 0.01104(7) 0.01263(6) 0.00982(6) 0.00057(4) -0.00402(5) -0.00383(4)
F1 0.0545(11) 0.0408(9) 0.0541(11) 0.0189(8) -0.0441(9) -0.0264(8)
N1 0.0149(9) 0.0161(8) 0.0179(9) 0.0005(7) -0.0029(7) -0.0058(7)
C1 0.0229(12) 0.0300(12) 0.0221(12) -0.0008(9) -0.0102(10) -0.0117(10)
O1 0.0187(8) 0.0201(8) 0.0159(7) 0.0008(6) -0.0069(6) -0.0096(6)
F2 0.0196(9) 0.155(2) 0.0498(12) -0.0498(13) 0.0030(8) -0.0315(11)
N2 0.0158(9) 0.0182(9) 0.0142(9) -0.0015(7) -0.0051(7) -0.0067(7)
C2 0.0155(11) 0.0268(11) 0.0090(9) -0.0021(8) -0.0012(8) -0.0114(9)
O2 0.0166(8) 0.0157(7) 0.0174(8) -0.0015(6) -0.0054(6) -0.0063(6)
F3 0.0612(11) 0.0331(8) 0.0658(12) 0.0041(8) -0.0474(10) -0.0238(8)
N3 0.0139(9) 0.0131(8) 0.0134(8) 0.0004(6) -0.0042(7) -0.0042(7)
C3 0.0216(12) 0.0199(10) 0.0167(11) -0.0004(8) -0.0046(9) -0.0113(9)
O3 0.0164(8) 0.0165(7) 0.0133(7) -0.0006(6) -0.0058(6) -0.0035(6)
F4 0.0357(9) 0.0386(8) 0.0176(7) 0.0132(6) -0.0063(6) -0.0041(7)
N4 0.0140(9) 0.0172(9) 0.0165(9) 0.0003(7) -0.0054(7) -0.0054(7)
C4 0.0134(10) 0.0164(10) 0.0097(9) -0.0028(7) 0.0018(8) -0.0058(8)
O4 0.0151(7) 0.0145(7) 0.0137(7) 0.0001(5) -0.0058(6) -0.0037(6)
O6 0.0162(8) 0.0177(7) 0.0162(7) 0.0004(6) -0.0058(6) -0.0082(6)
F6 0.0320(8) 0.0349(8) 0.0416(9) 0.0088(7) -0.0274(7) -0.0106(7)
C6 0.0180(11) 0.0144(10) 0.0199(11) -0.0032(8) -0.0020(9) -0.0062(8)
O5 0.0155(8) 0.0220(8) 0.0202(8) 0.0032(6) -0.0088(6) -0.0068(6)
F5 0.0494(10) 0.0163(6) 0.0318(8) 0.0011(6) -0.0249(7) 0.0032(6)
C5 0.0145(11) 0.0164(10) 0.0126(10) -0.0027(8) 0.0016(8) -0.0062(8)
C9 0.0184(13) 0.0221(12) 0.0586(19) 0.0033(12) -0.0172(13) -0.0045(10)
C8 0.0200(12) 0.0162(11) 0.0436(15) -0.0008(10) -0.0103(11) -0.0065(9)
C7 0.0126(11) 0.0159(10) 0.0207(11) -0.0031(8) 0.0006(9) -0.0031(8)
C10 0.0173(12) 0.0168(11) 0.0503(17) 0.0028(10) -0.0100(12) -0.0005(9)
C11 0.0206(12) 0.0137(10) 0.0388(14) -0.0032(9) -0.0034(11) -0.0043(9)
C12 0.0138(11) 0.0153(10) 0.0220(11) -0.0038(8) 0.0016(9) -0.0040(8)
C13 0.0257(13) 0.0150(10) 0.0257(12) -0.0054(9) -0.0028(10) -0.0098(9)
C15 0.0220(12) 0.0190(10) 0.0174(11) 0.0014(8) -0.0084(9) -0.0046(9)
C14 0.0202(12) 0.0210(11) 0.0190(11) -0.0046(8) -0.0040(9) -0.0096(9)
C018 0.0173(11) 0.0225(11) 0.0206(11) 0.0023(9) -0.0082(9) -0.0093(9)
C18 0.0125(10) 0.0143(9) 0.0141(10) -0.0011(7) -0.0032(8) -0.0066(8)
C17 0.0153(11) 0.0114(9) 0.0176(10) 0.0007(8) -0.0057(9) -0.0032(8)
C16 0.0124(10) 0.0163(10) 0.0154(10) 0.0039(8) -0.0044(8) -0.0066(8)
C19 0.0151(10) 0.0142(9) 0.0135(10) -0.0002(8) -0.0042(8) -0.0073(8)
C01R 0.0150(11) 0.0226(11) 0.0318(13) 0.0020(9) -0.0103(10) -0.0057(9)
C01Y 0.0144(11) 0.0206(11) 0.0289(13) -0.0043(9) -0.0005(10) -0.0038(9)
C20 0.0163(11) 0.0142(9) 0.0151(10) -0.0016(8) -0.0046(8) -0.0064(8)
C21 0.0196(11) 0.0172(10) 0.0161(10) -0.0005(8) -0.0075(9) -0.0098(9)
C23 0.0359(14) 0.0314(13) 0.0195(12) 0.0059(10) -0.0168(11) -0.0158(11)
C22 0.0253(13) 0.0224(11) 0.0212(11) -0.0002(9) -0.0106(10) -0.0084(9)
C24 0.0317(14) 0.0397(14) 0.0137(11) -0.0020(10) -0.0057(10) -0.0219(11)
C25 0.0234(12) 0.0276(12) 0.0175(11) -0.0061(9) -0.0020(9) -0.0131(10)
C27 0.0166(11) 0.0181(10) 0.0194(11) -0.0052(8) -0.0006(9) -0.0059(9)
C26 0.0200(11) 0.0212(11) 0.0155(10) -0.0021(8) -0.0049(9) -0.0125(9)
C28 0.0158(11) 0.0147(10) 0.0191(11) 0.0001(8) -0.0057(9) -0.0048(8)
C30 0.0281(14) 0.0423(14) 0.0274(13) 0.0132(11) -0.0188(11) -0.0229(12)
C31 0.0443(17) 0.0471(16) 0.0330(14) 0.0165(12) -0.0261(13) -0.0360(14)
C32 0.0161(11) 0.0241(11) 0.0165(10) 0.0000(8) -0.0043(9) -0.0108(9)
C33 0.0179(11) 0.0206(10) 0.0149(10) -0.0027(8) -0.0021(9) -0.0096(9)
C34 0.0200(11) 0.0214(11) 0.0150(10) -0.0023(8) -0.0041(9) -0.0118(9)
C35 0.0208(12) 0.0194(10) 0.0139(10) -0.0025(8) -0.0019(9) -0.0086(9)
C36 0.0225(12) 0.0264(12) 0.0176(11) -0.0008(9) -0.0043(9) -0.0113(10)
C37 0.0286(13) 0.0251(12) 0.0217(12) 0.0022(9) -0.0086(10) -0.0068(10)
C38 0.0368(15) 0.0185(11) 0.0281(13) 0.0027(9) -0.0080(11) -0.0107(10)
C39 0.0309(14) 0.0201(11) 0.0274(13) -0.0023(9) -0.0058(11) -0.0130(10)
C40 0.0213(12) 0.0202(11) 0.0169(11) -0.0043(8) -0.0014(9) -0.0093(9)
C41 0.0237(12) 0.0263(12) 0.0217(12) -0.0057(9) -0.0051(10) -0.0142(10)
C42 0.0208(12) 0.0252(11) 0.0172(11) -0.0024(9) -0.0060(9) -0.0107(9)
C43 0.0173(11) 0.0155(10) 0.0171(11) -0.0039(8) -0.0027(9) -0.0068(8)
C44 0.0183(12) 0.0333(13) 0.0179(11) -0.0046(9) 0.0006(9) -0.0086(10)
C45 0.0123(11) 0.0314(13) 0.0297(13) -0.0101(10) 0.0022(10) -0.0051(10)
C46 0.0160(11) 0.0192(11) 0.0308(13) -0.0042(9) -0.0074(10) -0.0021(9)
C47 0.0173(11) 0.0192(11) 0.0232(12) 0.0023(9) -0.0046(9) -0.0051(9)
C48 0.0198(11) 0.0159(10) 0.0151(10) -0.0020(8) -0.0041(9) -0.0081(8)
C49 0.0249(13) 0.0281(12) 0.0152(11) -0.0002(9) -0.0004(10) -0.0095(10)
C50 0.0379(15) 0.0293(13) 0.0157(11) 0.0042(9) -0.0073(11) -0.0096(11)
C51 0.0265(13) 0.0235(11) 0.0190(11) -0.0001(9) -0.0108(10) -0.0039(10)
C52 0.0203(12) 0.0214(11) 0.0173(11) -0.0019(8) -0.0064(9) -0.0067(9)
C53 0.0171(11) 0.0134(9) 0.0143(10) -0.0005(8) -0.0043(9) -0.0073(8)
C54 0.0207(12) 0.0202(10) 0.0147(10) -0.0011(8) -0.0022(9) -0.0085(9)
C55 0.0309(13) 0.0229(11) 0.0126(10) 0.0023(8) -0.0082(10) -0.0139(10)
C56 0.0239(12) 0.0190(10) 0.0198(11) 0.0051(8) -0.0125(10) -0.0080(9)
C57 0.0188(11) 0.0154(10) 0.0173(11) 0.0002(8) -0.0063(9) -0.0049(8)
C58 0.0163(11) 0.0133(9) 0.0166(10) 0.0001(8) -0.0030(9) -0.0080(8)
C59 0.0178(11) 0.0191(10) 0.0184(11) -0.0017(8) -0.0010(9) -0.0070(9)
C29 0.068(2) 0.075(2) 0.058(2) 0.0403(19) -0.050(2) -0.058(2)
F9 0.064(4) 0.092(5) 0.064(4) -0.007(3) -0.040(3) -0.004(3)
F8 0.046(4) 0.063(4) 0.038(3) 0.011(2) -0.032(3) -0.032(3)
F7 0.069(5) 0.052(5) 0.057(4) 0.007(3) -0.033(3) -0.022(3)
F7B 0.070(2) 0.053(2) 0.0305(14) 0.0156(13) -0.0361(13) -0.0235(16)
F8B 0.114(3) 0.109(3) 0.126(3) 0.080(2) -0.109(2) -0.091(2)
F9B 0.0503(17) 0.076(2) 0.079(2) 0.0275(16) -0.0507(15) -0.0098(14)
 
_geom_special_details
;
 All esds (except the esd in the dihedral angle between two l.s. planes)
 are estimated using the full covariance matrix.  The cell esds are taken
 into account individually in the estimation of esds in distances, angles
 and torsion angles; correlations between esds in cell parameters are only
 used when they are defined by crystal symmetry.  An approximate (isotropic)
 treatment of cell esds is used for estimating esds involving l.s. planes.
;
 
loop_
 _geom_bond_atom_site_label_1
 _geom_bond_atom_site_label_2
 _geom_bond_distance
 _geom_bond_site_symmetry_2
 _geom_bond_publ_flag
Pr1 O5 2.4527(15) . ?
Pr1 O4 2.4531(14) . ?
Pr1 O2 2.4614(14) . ?
Pr1 O6 2.4651(14) . ?
Pr1 O3 2.4770(14) . ?
Pr1 O1 2.5131(15) . ?
Pr1 N2 2.7434(17) . ?
Pr1 N1 2.7792(18) . ?
Pr1 N3 2.8045(17) . ?
Pr1 N4 2.8378(18) . ?
F1 C1 1.323(3) . ?
N1 C47 1.342(3) . ?
N1 C43 1.345(3) . ?
C1 F2 1.322(3) . ?
C1 F3 1.332(3) . ?
C1 C2 1.542(3) . ?
O1 C2 1.248(3) . ?
N2 C52 1.342(3) . ?
N2 C48 1.345(3) . ?
C2 C3 1.394(3) . ?
O2 C4 1.259(3) . ?
N3 C57 1.337(3) . ?
N3 C53 1.345(3) . ?
C3 C4 1.414(3) . ?
C3 H3 0.9500 . ?
O3 C16 1.263(3) . ?
F4 C15 1.333(3) . ?
N4 C018 1.343(3) . ?
N4 C58 1.346(3) . ?
C4 C5 1.509(3) . ?
O4 C18 1.255(2) . ?
O6 C32 1.243(3) . ?
F6 C15 1.344(3) . ?
C6 C5 1.373(3) . ?
C6 C7 1.418(3) . ?
C6 H6 0.9500 . ?
O5 C30 1.254(3) . ?
F5 C15 1.341(3) . ?
C5 C14 1.421(3) . ?
C9 C8 1.367(3) . ?
C9 C10 1.412(4) . ?
C9 H9 0.9500 . ?
C8 C7 1.410(3) . ?
C8 H8 0.9500 . ?
C7 C12 1.424(3) . ?
C10 C11 1.367(4) . ?
C10 H10 0.9500 . ?
C11 C12 1.420(3) . ?
C11 H11 0.9500 . ?
C12 C13 1.424(3) . ?
C13 C14 1.361(3) . ?
C13 H13 0.9500 . ?
C15 C16 1.534(3) . ?
C14 H14 0.9500 . ?
C018 C01R 1.386(3) . ?
C018 H018 0.9500 . ?
C18 C17 1.424(3) . ?
C18 C19 1.500(3) . ?
C17 C16 1.383(3) . ?
C17 H17 0.9500 . ?
C19 C20 1.379(3) . ?
C19 C28 1.419(3) . ?
C01R C01Y 1.382(3) . ?
C01R H01R 0.9500 . ?
C01Y C59 1.385(3) . ?
C01Y H01Y 0.9500 . ?
C20 C21 1.414(3) . ?
C20 H20 0.9500 . ?
C21 C22 1.422(3) . ?
C21 C26 1.425(3) . ?
C23 C22 1.363(3) . ?
C23 C24 1.415(4) . ?
C23 H23 0.9500 . ?
C22 H22 0.9500 . ?
C24 C25 1.370(3) . ?
C24 H24 0.9500 . ?
C25 C26 1.417(3) . ?
C25 H25 0.9500 . ?
C27 C28 1.368(3) . ?
C27 C26 1.424(3) . ?
C27 H27 0.9500 . ?
C28 H28 0.9500 . ?
C30 C31 1.378(3) . ?
C30 C29 1.546(3) . ?
C31 C32 1.427(3) . ?
C31 H31 0.9500 . ?
C32 C33 1.507(3) . ?
C33 C34 1.375(3) . ?
C33 C42 1.424(3) . ?
C34 C35 1.418(3) . ?
C34 H34 0.9500 . ?
C35 C36 1.418(3) . ?
C35 C40 1.425(3) . ?
C36 C37 1.367(3) . ?
C36 H36 0.9500 . ?
C37 C38 1.413(4) . ?
C37 H37 0.9500 . ?
C38 C39 1.367(4) . ?
C38 H38 0.9500 . ?
C39 C40 1.422(3) . ?
C39 H39 0.9500 . ?
C40 C41 1.417(3) . ?
C41 C42 1.365(3) . ?
C41 H41 0.9500 . ?
C42 H42 0.9500 . ?
C43 C44 1.394(3) . ?
C43 C48 1.492(3) . ?
C44 C45 1.384(3) . ?
C44 H44 0.9500 . ?
C45 C46 1.379(4) . ?
C45 H45 0.9500 . ?
C46 C47 1.382(3) . ?
C46 H46 0.9500 . ?
C47 H47 0.9500 . ?
C48 C49 1.394(3) . ?
C49 C50 1.385(3) . ?
C49 H49 0.9500 . ?
C50 C51 1.379(4) . ?
C50 H50 0.9500 . ?
C51 C52 1.383(3) . ?
C51 H51 0.9500 . ?
C52 H52 0.9500 . ?
C53 C54 1.397(3) . ?
C53 C58 1.491(3) . ?
C54 C55 1.386(3) . ?
C54 H54 0.9500 . ?
C55 C56 1.380(3) . ?
C55 H55 0.9500 . ?
C56 C57 1.391(3) . ?
C56 H56 0.9500 . ?
C57 H57 0.9500 . ?
C58 C59 1.395(3) . ?
C59 H59 0.9500 . ?
C29 F9 1.262(6) . ?
C29 F8B 1.291(3) . ?
C29 F7 1.292(6) . ?
C29 F7B 1.323(4) . ?
C29 F9B 1.416(4) . ?
C29 F8 1.450(5) . ?
 
loop_
 _geom_angle_atom_site_label_1
 _geom_angle_atom_site_label_2
 _geom_angle_atom_site_label_3
 _geom_angle
 _geom_angle_site_symmetry_1
 _geom_angle_site_symmetry_3
 _geom_angle_publ_flag
O5 Pr1 O4 68.48(5) . . ?
O5 Pr1 O2 82.29(5) . . ?
O4 Pr1 O2 129.62(5) . . ?
O5 Pr1 O6 69.09(5) . . ?
O4 Pr1 O6 73.64(5) . . ?
O2 Pr1 O6 132.82(5) . . ?
O5 Pr1 O3 127.10(5) . . ?
O4 Pr1 O3 68.65(5) . . ?
O2 Pr1 O3 150.40(5) . . ?
O6 Pr1 O3 70.27(5) . . ?
O5 Pr1 O1 149.92(5) . . ?
O4 Pr1 O1 132.03(5) . . ?
O2 Pr1 O1 67.63(5) . . ?
O6 Pr1 O1 132.25(5) . . ?
O3 Pr1 O1 82.95(5) . . ?
O5 Pr1 N2 119.55(5) . . ?
O4 Pr1 N2 131.44(5) . . ?
O2 Pr1 N2 98.44(5) . . ?
O6 Pr1 N2 67.42(5) . . ?
O3 Pr1 N2 71.63(5) . . ?
O1 Pr1 N2 66.88(5) . . ?
O5 Pr1 N1 67.85(5) . . ?
O4 Pr1 N1 129.51(5) . . ?
O2 Pr1 N1 66.60(5) . . ?
O6 Pr1 N1 68.10(5) . . ?
O3 Pr1 N1 123.53(5) . . ?
O1 Pr1 N1 98.31(5) . . ?
N2 Pr1 N1 58.10(5) . . ?
O5 Pr1 N3 68.52(5) . . ?
O4 Pr1 N3 64.84(5) . . ?
O2 Pr1 N3 66.57(5) . . ?
O6 Pr1 N3 128.69(5) . . ?
O3 Pr1 N3 116.98(5) . . ?
O1 Pr1 N3 98.46(5) . . ?
N2 Pr1 N3 162.82(5) . . ?
N1 Pr1 N3 118.55(5) . . ?
O5 Pr1 N4 120.44(5) . . ?
O4 Pr1 N4 68.44(5) . . ?
O2 Pr1 N4 95.42(5) . . ?
O6 Pr1 N4 131.20(5) . . ?
O3 Pr1 N4 68.04(5) . . ?
O1 Pr1 N4 65.27(5) . . ?
N2 Pr1 N4 119.62(5) . . ?
N1 Pr1 N4 159.96(5) . . ?
N3 Pr1 N4 56.80(5) . . ?
C47 N1 C43 117.87(19) . . ?
C47 N1 Pr1 119.03(14) . . ?
C43 N1 Pr1 121.97(13) . . ?
F2 C1 F1 107.8(2) . . ?
F2 C1 F3 107.0(2) . . ?
F1 C1 F3 105.30(19) . . ?
F2 C1 C2 110.63(19) . . ?
F1 C1 C2 111.49(19) . . ?
F3 C1 C2 114.29(19) . . ?
C2 O1 Pr1 135.03(14) . . ?
C52 N2 C48 117.61(18) . . ?
C52 N2 Pr1 117.84(14) . . ?
C48 N2 Pr1 122.82(13) . . ?
O1 C2 C3 129.5(2) . . ?
O1 C2 C1 113.45(19) . . ?
C3 C2 C1 117.06(19) . . ?
C4 O2 Pr1 141.16(13) . . ?
C57 N3 C53 117.72(18) . . ?
C57 N3 Pr1 118.76(14) . . ?
C53 N3 Pr1 122.44(13) . . ?
C2 C3 C4 121.7(2) . . ?
C2 C3 H3 119.2 . . ?
C4 C3 H3 119.2 . . ?
C16 O3 Pr1 134.53(13) . . ?
C018 N4 C58 117.63(19) . . ?
C018 N4 Pr1 117.60(14) . . ?
C58 N4 Pr1 119.29(13) . . ?
O2 C4 C3 123.42(19) . . ?
O2 C4 C5 116.39(18) . . ?
C3 C4 C5 120.19(18) . . ?
C18 O4 Pr1 139.81(13) . . ?
C32 O6 Pr1 136.78(14) . . ?
C5 C6 C7 122.2(2) . . ?
C5 C6 H6 118.9 . . ?
C7 C6 H6 118.9 . . ?
C30 O5 Pr1 132.40(14) . . ?
C6 C5 C14 118.84(19) . . ?
C6 C5 C4 117.90(18) . . ?
C14 C5 C4 123.26(19) . . ?
C8 C9 C10 120.3(2) . . ?
C8 C9 H9 119.8 . . ?
C10 C9 H9 119.8 . . ?
C9 C8 C7 120.8(2) . . ?
C9 C8 H8 119.6 . . ?
C7 C8 H8 119.6 . . ?
C8 C7 C6 122.5(2) . . ?
C8 C7 C12 119.0(2) . . ?
C6 C7 C12 118.4(2) . . ?
C11 C10 C9 120.5(2) . . ?
C11 C10 H10 119.8 . . ?
C9 C10 H10 119.8 . . ?
C10 C11 C12 120.4(2) . . ?
C10 C11 H11 119.8 . . ?
C12 C11 H11 119.8 . . ?
C11 C12 C13 122.7(2) . . ?
C11 C12 C7 118.9(2) . . ?
C13 C12 C7 118.4(2) . . ?
C14 C13 C12 121.6(2) . . ?
C14 C13 H13 119.2 . . ?
C12 C13 H13 119.2 . . ?
F4 C15 F5 107.18(18) . . ?
F4 C15 F6 106.24(18) . . ?
F5 C15 F6 105.98(18) . . ?
F4 C15 C16 111.97(18) . . ?
F5 C15 C16 114.14(18) . . ?
F6 C15 C16 110.84(17) . . ?
C13 C14 C5 120.6(2) . . ?
C13 C14 H14 119.7 . . ?
C5 C14 H14 119.7 . . ?
N4 C018 C01R 123.5(2) . . ?
N4 C018 H018 118.2 . . ?
C01R C018 H018 118.2 . . ?
O4 C18 C17 122.48(19) . . ?
O4 C18 C19 116.52(18) . . ?
C17 C18 C19 120.96(18) . . ?
C16 C17 C18 121.54(19) . . ?
C16 C17 H17 119.2 . . ?
C18 C17 H17 119.2 . . ?
O3 C16 C17 130.13(19) . . ?
O3 C16 C15 112.41(18) . . ?
C17 C16 C15 117.35(18) . . ?
C20 C19 C28 118.95(19) . . ?
C20 C19 C18 117.71(18) . . ?
C28 C19 C18 123.23(18) . . ?
C01Y C01R C018 118.4(2) . . ?
C01Y C01R H01R 120.8 . . ?
C018 C01R H01R 120.8 . . ?
C01R C01Y C59 119.1(2) . . ?
C01R C01Y H01Y 120.5 . . ?
C59 C01Y H01Y 120.5 . . ?
C19 C20 C21 121.62(19) . . ?
C19 C20 H20 119.2 . . ?
C21 C20 H20 119.2 . . ?
C20 C21 C22 122.2(2) . . ?
C20 C21 C26 119.10(19) . . ?
C22 C21 C26 118.7(2) . . ?
C22 C23 C24 120.5(2) . . ?
C22 C23 H23 119.8 . . ?
C24 C23 H23 119.8 . . ?
C23 C22 C21 120.8(2) . . ?
C23 C22 H22 119.6 . . ?
C21 C22 H22 119.6 . . ?
C25 C24 C23 120.2(2) . . ?
C25 C24 H24 119.9 . . ?
C23 C24 H24 119.9 . . ?
C24 C25 C26 120.7(2) . . ?
C24 C25 H25 119.7 . . ?
C26 C25 H25 119.7 . . ?
C28 C27 C26 121.1(2) . . ?
C28 C27 H27 119.5 . . ?
C26 C27 H27 119.5 . . ?
C25 C26 C27 122.6(2) . . ?
C25 C26 C21 119.1(2) . . ?
C27 C26 C21 118.33(19) . . ?
C27 C28 C19 120.9(2) . . ?
C27 C28 H28 119.6 . . ?
C19 C28 H28 119.6 . . ?
O5 C30 C31 129.9(2) . . ?
O5 C30 C29 112.0(2) . . ?
C31 C30 C29 118.1(2) . . ?
C30 C31 C32 122.3(2) . . ?
C30 C31 H31 118.9 . . ?
C32 C31 H31 118.9 . . ?
O6 C32 C31 123.0(2) . . ?
O6 C32 C33 116.80(19) . . ?
C31 C32 C33 120.1(2) . . ?
C34 C33 C42 119.1(2) . . ?
C34 C33 C32 117.46(19) . . ?
C42 C33 C32 123.41(19) . . ?
C33 C34 C35 121.8(2) . . ?
C33 C34 H34 119.1 . . ?
C35 C34 H34 119.1 . . ?
C34 C35 C36 122.3(2) . . ?
C34 C35 C40 118.6(2) . . ?
C36 C35 C40 119.1(2) . . ?
C37 C36 C35 120.5(2) . . ?
C37 C36 H36 119.8 . . ?
C35 C36 H36 119.8 . . ?
C36 C37 C38 120.6(2) . . ?
C36 C37 H37 119.7 . . ?
C38 C37 H37 119.7 . . ?
C39 C38 C37 120.3(2) . . ?
C39 C38 H38 119.8 . . ?
C37 C38 H38 119.8 . . ?
C38 C39 C40 120.7(2) . . ?
C38 C39 H39 119.7 . . ?
C40 C39 H39 119.7 . . ?
C41 C40 C39 122.6(2) . . ?
C41 C40 C35 118.7(2) . . ?
C39 C40 C35 118.7(2) . . ?
C42 C41 C40 121.5(2) . . ?
C42 C41 H41 119.2 . . ?
C40 C41 H41 119.2 . . ?
C41 C42 C33 120.3(2) . . ?
C41 C42 H42 119.8 . . ?
C33 C42 H42 119.8 . . ?
N1 C43 C44 121.7(2) . . ?
N1 C43 C48 116.24(19) . . ?
C44 C43 C48 122.1(2) . . ?
C45 C44 C43 119.5(2) . . ?
C45 C44 H44 120.3 . . ?
C43 C44 H44 120.3 . . ?
C46 C45 C44 119.0(2) . . ?
C46 C45 H45 120.5 . . ?
C44 C45 H45 120.5 . . ?
C45 C46 C47 118.2(2) . . ?
C45 C46 H46 120.9 . . ?
C47 C46 H46 120.9 . . ?
N1 C47 C46 123.7(2) . . ?
N1 C47 H47 118.1 . . ?
C46 C47 H47 118.1 . . ?
N2 C48 C49 121.9(2) . . ?
N2 C48 C43 116.21(18) . . ?
C49 C48 C43 121.8(2) . . ?
C50 C49 C48 119.5(2) . . ?
C50 C49 H49 120.3 . . ?
C48 C49 H49 120.3 . . ?
C51 C50 C49 118.7(2) . . ?
C51 C50 H50 120.6 . . ?
C49 C50 H50 120.6 . . ?
C50 C51 C52 118.5(2) . . ?
C50 C51 H51 120.8 . . ?
C52 C51 H51 120.8 . . ?
N2 C52 C51 123.7(2) . . ?
N2 C52 H52 118.1 . . ?
C51 C52 H52 118.1 . . ?
N3 C53 C54 122.15(19) . . ?
N3 C53 C58 116.34(18) . . ?
C54 C53 C58 121.48(19) . . ?
C55 C54 C53 119.2(2) . . ?
C55 C54 H54 120.4 . . ?
C53 C54 H54 120.4 . . ?
C56 C55 C54 118.8(2) . . ?
C56 C55 H55 120.6 . . ?
C54 C55 H55 120.6 . . ?
C55 C56 C57 118.4(2) . . ?
C55 C56 H56 120.8 . . ?
C57 C56 H56 120.8 . . ?
N3 C57 C56 123.7(2) . . ?
N3 C57 H57 118.2 . . ?
C56 C57 H57 118.2 . . ?
N4 C58 C59 122.2(2) . . ?
N4 C58 C53 115.76(18) . . ?
C59 C58 C53 121.99(19) . . ?
C01Y C59 C58 119.0(2) . . ?
C01Y C59 H59 120.5 . . ?
C58 C59 H59 120.5 . . ?
F9 C29 F7 114.9(5) . . ?
F8B C29 F7B 112.7(3) . . ?
F8B C29 F9B 103.0(3) . . ?
F7B C29 F9B 104.2(3) . . ?
F9 C29 F8 102.1(5) . . ?
F7 C29 F8 102.1(5) . . ?
F9 C29 C30 111.5(5) . . ?
F8B C29 C30 116.9(2) . . ?
F7 C29 C30 117.8(6) . . ?
F7B C29 C30 111.1(3) . . ?
F9B C29 C30 107.6(3) . . ?
F8 C29 C30 106.3(3) . . ?
 
loop_
 _geom_torsion_atom_site_label_1
 _geom_torsion_atom_site_label_2
 _geom_torsion_atom_site_label_3
 _geom_torsion_atom_site_label_4
 _geom_torsion
 _geom_torsion_site_symmetry_1
 _geom_torsion_site_symmetry_2
 _geom_torsion_site_symmetry_3
 _geom_torsion_site_symmetry_4
 _geom_torsion_publ_flag
Pr1 O1 C2 C3 -9.8(4) . . . . ?
Pr1 O1 C2 C1 168.03(14) . . . . ?
F2 C1 C2 O1 -78.6(3) . . . . ?
F1 C1 C2 O1 41.4(3) . . . . ?
F3 C1 C2 O1 160.6(2) . . . . ?
F2 C1 C2 C3 99.6(3) . . . . ?
F1 C1 C2 C3 -140.5(2) . . . . ?
F3 C1 C2 C3 -21.2(3) . . . . ?
O1 C2 C3 C4 -0.4(4) . . . . ?
C1 C2 C3 C4 -178.2(2) . . . . ?
Pr1 O2 C4 C3 11.6(3) . . . . ?
Pr1 O2 C4 C5 -168.36(14) . . . . ?
C2 C3 C4 O2 0.2(3) . . . . ?
C2 C3 C4 C5 -179.78(19) . . . . ?
C7 C6 C5 C14 -1.2(3) . . . . ?
C7 C6 C5 C4 178.61(19) . . . . ?
O2 C4 C5 C6 0.7(3) . . . . ?
C3 C4 C5 C6 -179.3(2) . . . . ?
O2 C4 C5 C14 -179.57(19) . . . . ?
C3 C4 C5 C14 0.5(3) . . . . ?
C10 C9 C8 C7 -0.9(4) . . . . ?
C9 C8 C7 C6 179.7(2) . . . . ?
C9 C8 C7 C12 0.5(4) . . . . ?
C5 C6 C7 C8 -178.4(2) . . . . ?
C5 C6 C7 C12 0.7(3) . . . . ?
C8 C9 C10 C11 1.0(4) . . . . ?
C9 C10 C11 C12 -0.7(4) . . . . ?
C10 C11 C12 C13 -179.0(2) . . . . ?
C10 C11 C12 C7 0.4(4) . . . . ?
C8 C7 C12 C11 -0.3(3) . . . . ?
C6 C7 C12 C11 -179.4(2) . . . . ?
C8 C7 C12 C13 179.1(2) . . . . ?
C6 C7 C12 C13 -0.1(3) . . . . ?
C11 C12 C13 C14 179.2(2) . . . . ?
C7 C12 C13 C14 -0.2(3) . . . . ?
C12 C13 C14 C5 -0.2(3) . . . . ?
C6 C5 C14 C13 0.9(3) . . . . ?
C4 C5 C14 C13 -178.9(2) . . . . ?
C58 N4 C018 C01R 2.8(3) . . . . ?
Pr1 N4 C018 C01R -150.95(18) . . . . ?
Pr1 O4 C18 C17 -24.9(3) . . . . ?
Pr1 O4 C18 C19 152.79(15) . . . . ?
O4 C18 C17 C16 10.8(3) . . . . ?
C19 C18 C17 C16 -166.81(19) . . . . ?
Pr1 O3 C16 C17 -4.9(4) . . . . ?
Pr1 O3 C16 C15 179.06(13) . . . . ?
C18 C17 C16 O3 2.8(4) . . . . ?
C18 C17 C16 C15 178.68(19) . . . . ?
F4 C15 C16 O3 -50.7(3) . . . . ?
F5 C15 C16 O3 -172.70(18) . . . . ?
F6 C15 C16 O3 67.7(2) . . . . ?
F4 C15 C16 C17 132.7(2) . . . . ?
F5 C15 C16 C17 10.7(3) . . . . ?
F6 C15 C16 C17 -108.9(2) . . . . ?
O4 C18 C19 C20 2.4(3) . . . . ?
C17 C18 C19 C20 -179.81(19) . . . . ?
O4 C18 C19 C28 -173.76(19) . . . . ?
C17 C18 C19 C28 4.0(3) . . . . ?
N4 C018 C01R C01Y -0.1(3) . . . . ?
C018 C01R C01Y C59 -1.5(3) . . . . ?
C28 C19 C20 C21 1.3(3) . . . . ?
C18 C19 C20 C21 -175.08(19) . . . . ?
C19 C20 C21 C22 177.4(2) . . . . ?
C19 C20 C21 C26 -0.3(3) . . . . ?
C24 C23 C22 C21 0.1(4) . . . . ?
C20 C21 C22 C23 -177.4(2) . . . . ?
C26 C21 C22 C23 0.3(3) . . . . ?
C22 C23 C24 C25 -1.1(4) . . . . ?
C23 C24 C25 C26 1.6(4) . . . . ?
C24 C25 C26 C27 178.0(2) . . . . ?
C24 C25 C26 C21 -1.2(3) . . . . ?
C28 C27 C26 C25 -177.3(2) . . . . ?
C28 C27 C26 C21 1.9(3) . . . . ?
C20 C21 C26 C25 178.0(2) . . . . ?
C22 C21 C26 C25 0.2(3) . . . . ?
C20 C21 C26 C27 -1.2(3) . . . . ?
C22 C21 C26 C27 -179.0(2) . . . . ?
C26 C27 C28 C19 -0.9(3) . . . . ?
C20 C19 C28 C27 -0.6(3) . . . . ?
C18 C19 C28 C27 175.5(2) . . . . ?
Pr1 O5 C30 C31 -17.4(4) . . . . ?
Pr1 O5 C30 C29 161.53(18) . . . . ?
O5 C30 C31 C32 -2.5(5) . . . . ?
C29 C30 C31 C32 178.6(3) . . . . ?
Pr1 O6 C32 C31 22.5(4) . . . . ?
Pr1 O6 C32 C33 -155.72(14) . . . . ?
C30 C31 C32 O6 0.7(4) . . . . ?
C30 C31 C32 C33 178.8(2) . . . . ?
O6 C32 C33 C34 12.1(3) . . . . ?
C31 C32 C33 C34 -166.2(2) . . . . ?
O6 C32 C33 C42 -169.4(2) . . . . ?
C31 C32 C33 C42 12.4(3) . . . . ?
C42 C33 C34 C35 -1.7(3) . . . . ?
C32 C33 C34 C35 176.84(19) . . . . ?
C33 C34 C35 C36 -179.2(2) . . . . ?
C33 C34 C35 C40 0.5(3) . . . . ?
C34 C35 C36 C37 179.0(2) . . . . ?
C40 C35 C36 C37 -0.6(3) . . . . ?
C35 C36 C37 C38 -0.4(4) . . . . ?
C36 C37 C38 C39 1.1(4) . . . . ?
C37 C38 C39 C40 -0.8(4) . . . . ?
C38 C39 C40 C41 179.7(2) . . . . ?
C38 C39 C40 C35 -0.1(3) . . . . ?
C34 C35 C40 C41 1.3(3) . . . . ?
C36 C35 C40 C41 -179.0(2) . . . . ?
C34 C35 C40 C39 -178.8(2) . . . . ?
C36 C35 C40 C39 0.9(3) . . . . ?
C39 C40 C41 C42 178.2(2) . . . . ?
C35 C40 C41 C42 -1.9(3) . . . . ?
C40 C41 C42 C33 0.6(3) . . . . ?
C34 C33 C42 C41 1.2(3) . . . . ?
C32 C33 C42 C41 -177.3(2) . . . . ?
C47 N1 C43 C44 -0.8(3) . . . . ?
Pr1 N1 C43 C44 166.97(16) . . . . ?
C47 N1 C43 C48 177.48(19) . . . . ?
Pr1 N1 C43 C48 -14.8(2) . . . . ?
N1 C43 C44 C45 -0.3(3) . . . . ?
C48 C43 C44 C45 -178.5(2) . . . . ?
C43 C44 C45 C46 0.9(4) . . . . ?
C44 C45 C46 C47 -0.3(4) . . . . ?
C43 N1 C47 C46 1.3(3) . . . . ?
Pr1 N1 C47 C46 -166.77(18) . . . . ?
C45 C46 C47 N1 -0.8(4) . . . . ?
C52 N2 C48 C49 2.5(3) . . . . ?
Pr1 N2 C48 C49 -162.24(16) . . . . ?
C52 N2 C48 C43 -175.32(18) . . . . ?
Pr1 N2 C48 C43 20.0(2) . . . . ?
N1 C43 C48 N2 -3.0(3) . . . . ?
C44 C43 C48 N2 175.2(2) . . . . ?
N1 C43 C48 C49 179.2(2) . . . . ?
C44 C43 C48 C49 -2.6(3) . . . . ?
N2 C48 C49 C50 -1.3(3) . . . . ?
C43 C48 C49 C50 176.3(2) . . . . ?
C48 C49 C50 C51 -0.6(4) . . . . ?
C49 C50 C51 C52 1.4(4) . . . . ?
C48 N2 C52 C51 -1.7(3) . . . . ?
Pr1 N2 C52 C51 163.78(17) . . . . ?
C50 C51 C52 N2 -0.2(4) . . . . ?
C57 N3 C53 C54 0.4(3) . . . . ?
Pr1 N3 C53 C54 -167.51(15) . . . . ?
C57 N3 C53 C58 -177.29(18) . . . . ?
Pr1 N3 C53 C58 14.8(2) . . . . ?
N3 C53 C54 C55 -0.5(3) . . . . ?
C58 C53 C54 C55 177.08(19) . . . . ?
C53 C54 C55 C56 -0.2(3) . . . . ?
C54 C55 C56 C57 1.1(3) . . . . ?
C53 N3 C57 C56 0.5(3) . . . . ?
Pr1 N3 C57 C56 168.86(16) . . . . ?
C55 C56 C57 N3 -1.2(3) . . . . ?
C018 N4 C58 C59 -3.9(3) . . . . ?
Pr1 N4 C58 C59 149.42(17) . . . . ?
C018 N4 C58 C53 174.83(18) . . . . ?
Pr1 N4 C58 C53 -31.9(2) . . . . ?
N3 C53 C58 N4 11.6(3) . . . . ?
C54 C53 C58 N4 -166.16(19) . . . . ?
N3 C53 C58 C59 -169.72(19) . . . . ?
C54 C53 C58 C59 12.5(3) . . . . ?
C01R C01Y C59 C58 0.4(3) . . . . ?
N4 C58 C59 C01Y 2.3(3) . . . . ?
C53 C58 C59 C01Y -176.3(2) . . . . ?
O5 C30 C29 F9 99.2(6) . . . . ?
C31 C30 C29 F9 -81.7(7) . . . . ?
O5 C30 C29 F8B 168.2(4) . . . . ?
C31 C30 C29 F8B -12.7(5) . . . . ?
O5 C30 C29 F7 -36.7(6) . . . . ?
C31 C30 C29 F7 142.4(6) . . . . ?
O5 C30 C29 F7B -60.5(4) . . . . ?
C31 C30 C29 F7B 118.6(3) . . . . ?
O5 C30 C29 F9B 52.9(3) . . . . ?
C31 C30 C29 F9B -128.0(3) . . . . ?
O5 C30 C29 F8 -150.4(4) . . . . ?
C31 C30 C29 F8 28.7(5) . . . . ?
 
_refine_diff_density_max    1.085
_refine_diff_density_min   -0.968
_refine_diff_density_rms    0.076

_shelx_res_file
;
TITL RF1615  [PrL3(bipy)2]  in P-1
    rf1615.res
    created by SHELXL-2016/6 at 14:16:57 on 14-Jul-2020
CELL  0.71073  11.9059  15.3694  16.5675   79.097   70.308   67.575
ZERR    2.000   0.0004   0.0005   0.0006    0.002    0.002    0.002
LATT  1
SFAC C H N O F PR
UNIT 124 80 8 12 18 2

L.S. 20
BOND $H
LIST 6
CONF
HTAB
ACTA 54
OMIT -3 54
OMIT  0  1  1
OMIT  0  1  0
OMIT  0  0  1
FMAP 2
SADI 0.01 C29 F7 C29 F8 C29 F9 C29 F7b C29 F8b C29 F9b
SADI 0.01 F7 F8 F8 F9 F9 F7 F7b F8b F8b F9b F9b F7b
ISOR 0.002 F7 F8 F8 F9 F9 F7 F7b F8b F8b F9b F9b F7b
PLAN 12

TEMP -173.15
SIZE 0.32 0.27 0.22

WGHT    0.040100    1.545100
FVAR       0.32335   0.26551
PR1   6    0.699098    0.663514    0.233206    11.00000    0.01104    0.01263 =
         0.00982    0.00057   -0.00402   -0.00383
F1    5    0.452970    0.583672    0.075622    11.00000    0.05450    0.04081 =
         0.05406    0.01887   -0.04408   -0.02640
N1    3    0.941011    0.579478    0.125325    11.00000    0.01493    0.01609 =
         0.01786    0.00047   -0.00295   -0.00579
C1    1    0.459569    0.525694    0.145299    11.00000    0.02292    0.03000 =
         0.02210   -0.00079   -0.01021   -0.01174
O1    4    0.578653    0.600343    0.174297    11.00000    0.01867    0.02007 =
         0.01592    0.00075   -0.00693   -0.00958
F2    5    0.349294    0.555722    0.204839    11.00000    0.01957    0.15487 =
         0.04980   -0.04979    0.00299   -0.03154
N2    3    0.753546    0.689817    0.057667    11.00000    0.01579    0.01818 =
         0.01416   -0.00152   -0.00511   -0.00666
C2    1    0.568823    0.521666    0.177587    11.00000    0.01548    0.02676 =
         0.00901   -0.00209   -0.00120   -0.01137
O2    4    0.771142    0.489963    0.246340    11.00000    0.01663    0.01567 =
         0.01739   -0.00150   -0.00540   -0.00630
F3    5    0.469988    0.443239    0.123525    11.00000    0.06119    0.03313 =
         0.06581    0.00408   -0.04742   -0.02380
N3    3    0.635535    0.587860    0.403362    11.00000    0.01387    0.01307 =
         0.01343    0.00045   -0.00417   -0.00415
C3    1    0.638893    0.433707    0.208097    11.00000    0.02161    0.01990 =
         0.01666   -0.00044   -0.00460   -0.01134
AFIX  43
H3    2    0.619055    0.379898    0.206437    11.00000   -1.20000
AFIX   0
O3    4    0.549185    0.817871    0.196631    11.00000    0.01636    0.01652 =
         0.01333   -0.00065   -0.00577   -0.00351
F4    5    0.477717    0.980918    0.099002    11.00000    0.03574    0.03860 =
         0.01764    0.01322   -0.00629   -0.00406
N4    3    0.445099    0.689704    0.335428    11.00000    0.01401    0.01720 =
         0.01647    0.00033   -0.00536   -0.00536
C4    1    0.738739    0.422585    0.241448    11.00000    0.01337    0.01642 =
         0.00970   -0.00276    0.00182   -0.00583
O4    4    0.628925    0.774641    0.343511    11.00000    0.01506    0.01447 =
         0.01369    0.00009   -0.00576   -0.00370
O6    4    0.812094    0.776890    0.171809    11.00000    0.01620    0.01767 =
         0.01624    0.00038   -0.00575   -0.00815
F6    5    0.313810    0.945305    0.174732    11.00000    0.03195    0.03486 =
         0.04162    0.00883   -0.02737   -0.01060
C6    1    0.907945    0.319357    0.306241    11.00000    0.01800    0.01437 =
         0.01993   -0.00317   -0.00202   -0.00620
AFIX  43
H6    2    0.925290    0.374745    0.306381    11.00000   -1.20000
AFIX   0
O5    4    0.865257    0.635818    0.300742    11.00000    0.01546    0.02201 =
         0.02018    0.00318   -0.00879   -0.00681
F5    5    0.352418    1.055007    0.211548    11.00000    0.04935    0.01626 =
         0.03183    0.00112   -0.02490    0.00318
C5    1    0.812863    0.326199    0.273621    11.00000    0.01445    0.01638 =
         0.01259   -0.00268    0.00158   -0.00624
C9    1    1.144947    0.140076    0.407371    11.00000    0.01835    0.02208 =
         0.05863    0.00333   -0.01722   -0.00451
AFIX  43
H9    2    1.209933    0.136180    0.430389    11.00000   -1.20000
AFIX   0
C8    1    1.076843    0.225144    0.375313    11.00000    0.01999    0.01622 =
         0.04363   -0.00084   -0.01025   -0.00647
AFIX  43
H8    2    1.094173    0.280095    0.377011    11.00000   -1.20000
AFIX   0
C7    1    0.981147    0.232361    0.339740    11.00000    0.01257    0.01587 =
         0.02074   -0.00310    0.00058   -0.00311
C10   1    1.119175    0.057949    0.406442    11.00000    0.01727    0.01676 =
         0.05029    0.00276   -0.00997   -0.00050
AFIX  43
H10   2    1.166063   -0.000722    0.429684    11.00000   -1.20000
AFIX   0
C11   1    1.027277    0.062241    0.372355    11.00000    0.02058    0.01367 =
         0.03875   -0.00321   -0.00338   -0.00428
AFIX  43
H11   2    1.011405    0.006417    0.371455    11.00000   -1.20000
AFIX   0
C12   1    0.955358    0.149591    0.338272    11.00000    0.01380    0.01535 =
         0.02201   -0.00384    0.00161   -0.00396
C13   1    0.857225    0.158211    0.303310    11.00000    0.02568    0.01504 =
         0.02573   -0.00544   -0.00277   -0.00978
AFIX  43
H13   2    0.839233    0.103500    0.301809    11.00000   -1.20000
AFIX   0
C15   1    0.408160    0.969773    0.179700    11.00000    0.02203    0.01904 =
         0.01737    0.00137   -0.00837   -0.00461
C14   1    0.788587    0.242985    0.271988    11.00000    0.02021    0.02098 =
         0.01901   -0.00462   -0.00401   -0.00965
AFIX  43
H14   2    0.723882    0.246572    0.248830    11.00000   -1.20000
AFIX   0
C018  1    0.351913    0.740888    0.299545    11.00000    0.01731    0.02251 =
         0.02057    0.00225   -0.00823   -0.00926
AFIX  43
H018  2    0.370019    0.741144    0.239117    11.00000   -1.20000
AFIX   0
C18   1    0.542050    0.850446    0.368592    11.00000    0.01247    0.01432 =
         0.01414   -0.00114   -0.00322   -0.00664
C17   1    0.474898    0.916545    0.313419    11.00000    0.01530    0.01138 =
         0.01755    0.00073   -0.00574   -0.00321
AFIX  43
H17   2    0.420561    0.977388    0.332183    11.00000   -1.20000
AFIX   0
C16   1    0.486943    0.894231    0.233187    11.00000    0.01239    0.01629 =
         0.01544    0.00394   -0.00438   -0.00663
C19   1    0.508086    0.866976    0.461554    11.00000    0.01511    0.01416 =
         0.01353   -0.00023   -0.00422   -0.00733
C01R  1    0.230816    0.793325    0.345934    11.00000    0.01501    0.02259 =
         0.03182    0.00197   -0.01034   -0.00566
AFIX  43
H01R  2    0.167714    0.828679    0.317956    11.00000   -1.20000
AFIX   0
C01Y  1    0.204050    0.792958    0.433850    11.00000    0.01442    0.02064 =
         0.02892   -0.00429   -0.00053   -0.00380
AFIX  43
H01Y  2    0.122539    0.829345    0.467309    11.00000   -1.20000
AFIX   0
C20   1    0.577525    0.800027    0.511004    11.00000    0.01628    0.01424 =
         0.01510   -0.00162   -0.00457   -0.00636
AFIX  43
H20   2    0.648211    0.748626    0.484265    11.00000   -1.20000
AFIX   0
C21   1    0.546098    0.806006    0.600538    11.00000    0.01958    0.01724 =
         0.01614   -0.00046   -0.00747   -0.00984
C23   1    0.578045    0.741222    0.739427    11.00000    0.03591    0.03141 =
         0.01948    0.00586   -0.01675   -0.01580
AFIX  43
H23   2    0.624326    0.693525    0.773396    11.00000   -1.20000
AFIX   0
C22   1    0.613684    0.735448    0.652805    11.00000    0.02528    0.02239 =
         0.02120   -0.00020   -0.01055   -0.00837
AFIX  43
H22   2    0.684592    0.683621    0.627001    11.00000   -1.20000
AFIX   0
C24   1    0.472603    0.817744    0.779144    11.00000    0.03173    0.03973 =
         0.01375   -0.00200   -0.00573   -0.02189
AFIX  43
H24   2    0.447542    0.820610    0.839702    11.00000   -1.20000
AFIX   0
C25   1    0.406512    0.887729    0.730573    11.00000    0.02337    0.02764 =
         0.01751   -0.00614   -0.00204   -0.01306
AFIX  43
H25   2    0.337204    0.939676    0.757604    11.00000   -1.20000
AFIX   0
C27   1    0.372049    0.952963    0.587829    11.00000    0.01662    0.01806 =
         0.01944   -0.00521   -0.00060   -0.00592
AFIX  43
H27   2    0.302929    1.006029    0.613088    11.00000   -1.20000
AFIX   0
C26   1    0.440464    0.883428    0.640442    11.00000    0.02000    0.02117 =
         0.01552   -0.00207   -0.00486   -0.01255
C28   1    0.404213    0.944610    0.501511    11.00000    0.01583    0.01466 =
         0.01913    0.00013   -0.00565   -0.00481
AFIX  43
H28   2    0.356354    0.991422    0.467870    11.00000   -1.20000
AFIX   0
C30   1    0.919570    0.688084    0.308596    11.00000    0.02808    0.04230 =
         0.02742    0.01320   -0.01883   -0.02293
C31   1    0.926268    0.772434    0.264657    11.00000    0.04431    0.04711 =
         0.03298    0.01651   -0.02613   -0.03601
AFIX  43
H31   2    0.969224    0.804369    0.280524    11.00000   -1.20000
AFIX   0
C32   1    0.870888    0.813466    0.196132    11.00000    0.01606    0.02407 =
         0.01648    0.00002   -0.00434   -0.01079
C33   1    0.878745    0.906829    0.151335    11.00000    0.01792    0.02057 =
         0.01488   -0.00269   -0.00205   -0.00959
C34   1    0.801433    0.952718    0.099464    11.00000    0.01999    0.02143 =
         0.01497   -0.00228   -0.00414   -0.01179
AFIX  43
H34   2    0.749489    0.923119    0.091264    11.00000   -1.20000
AFIX   0
C35   1    0.797153    1.042974    0.057906    11.00000    0.02081    0.01944 =
         0.01387   -0.00247   -0.00191   -0.00859
C36   1    0.716615    1.091535    0.005162    11.00000    0.02248    0.02640 =
         0.01756   -0.00080   -0.00431   -0.01130
AFIX  43
H36   2    0.664123    1.062995   -0.003877    11.00000   -1.20000
AFIX   0
C37   1    0.714001    1.179135   -0.032761    11.00000    0.02858    0.02514 =
         0.02171    0.00223   -0.00859   -0.00681
AFIX  43
H37   2    0.660045    1.210797   -0.068229    11.00000   -1.20000
AFIX   0
C38   1    0.790771    1.222999   -0.019698    11.00000    0.03675    0.01850 =
         0.02807    0.00272   -0.00797   -0.01068
AFIX  43
H38   2    0.786998    1.284341   -0.045581    11.00000   -1.20000
AFIX   0
C39   1    0.870448    1.177646    0.029983    11.00000    0.03087    0.02013 =
         0.02742   -0.00231   -0.00583   -0.01302
AFIX  43
H39   2    0.922491    1.207445    0.037729    11.00000   -1.20000
AFIX   0
C40   1    0.876260    1.086316    0.070202    11.00000    0.02129    0.02019 =
         0.01691   -0.00428   -0.00142   -0.00925
C41   1    0.957802    1.036579    0.121911    11.00000    0.02371    0.02630 =
         0.02172   -0.00568   -0.00507   -0.01415
AFIX  43
H41   2    1.012718    1.064104    0.129051    11.00000   -1.20000
AFIX   0
C42   1    0.959263    0.950012    0.161709    11.00000    0.02084    0.02515 =
         0.01717   -0.00242   -0.00604   -0.01072
AFIX  43
H42   2    1.014256    0.918414    0.196495    11.00000   -1.20000
AFIX   0
C43   1    0.976769    0.609419    0.042045    11.00000    0.01731    0.01550 =
         0.01712   -0.00392   -0.00272   -0.00685
C44   1    1.103712    0.580508   -0.007265    11.00000    0.01832    0.03329 =
         0.01785   -0.00463    0.00064   -0.00857
AFIX  43
H44   2    1.126811    0.602272   -0.066051    11.00000   -1.20000
AFIX   0
C45   1    1.195845    0.519833    0.030103    11.00000    0.01234    0.03138 =
         0.02969   -0.01014    0.00219   -0.00505
AFIX  43
H45   2    1.282913    0.500157   -0.002432    11.00000   -1.20000
AFIX   0
C46   1    1.159453    0.488343    0.115248    11.00000    0.01601    0.01920 =
         0.03081   -0.00424   -0.00738   -0.00209
AFIX  43
H46   2    1.220576    0.446387    0.142499    11.00000   -1.20000
AFIX   0
C47   1    1.031705    0.519445    0.159872    11.00000    0.01732    0.01924 =
         0.02317    0.00227   -0.00461   -0.00510
AFIX  43
H47   2    1.006654    0.497065    0.218317    11.00000   -1.20000
AFIX   0
C48   1    0.872630    0.672820    0.005049    11.00000    0.01980    0.01595 =
         0.01509   -0.00196   -0.00413   -0.00809
C49   1    0.897314    0.709563   -0.080125    11.00000    0.02494    0.02809 =
         0.01523   -0.00015   -0.00038   -0.00953
AFIX  43
H49   2    0.982373    0.697598   -0.115601    11.00000   -1.20000
AFIX   0
C50   1    0.796835    0.763670   -0.112645    11.00000    0.03794    0.02927 =
         0.01569    0.00425   -0.00726   -0.00961
AFIX  43
H50   2    0.811869    0.789815   -0.170379    11.00000   -1.20000
AFIX   0
C51   1    0.674537    0.778869   -0.059611    11.00000    0.02655    0.02346 =
         0.01897   -0.00011   -0.01078   -0.00390
AFIX  43
H51   2    0.603624    0.814508   -0.080357    11.00000   -1.20000
AFIX   0
C52   1    0.657533    0.741024    0.024470    11.00000    0.02031    0.02142 =
         0.01735   -0.00191   -0.00640   -0.00674
AFIX  43
H52   2    0.573117    0.751884    0.060790    11.00000   -1.20000
AFIX   0
C53   1    0.519506    0.622447    0.459146    11.00000    0.01715    0.01344 =
         0.01434   -0.00052   -0.00430   -0.00725
C54   1    0.494953    0.597160    0.547266    11.00000    0.02070    0.02023 =
         0.01467   -0.00110   -0.00217   -0.00847
AFIX  43
H54   2    0.412262    0.623078    0.585286    11.00000   -1.20000
AFIX   0
C55   1    0.592655    0.533819    0.578559    11.00000    0.03092    0.02291 =
         0.01259    0.00230   -0.00818   -0.01387
AFIX  43
H55   2    0.578091    0.515869    0.638271    11.00000   -1.20000
AFIX   0
C56   1    0.711482    0.497283    0.521435    11.00000    0.02392    0.01899 =
         0.01980    0.00511   -0.01254   -0.00802
AFIX  43
H56   2    0.779994    0.452919    0.540802    11.00000   -1.20000
AFIX   0
C57   1    0.728522    0.526981    0.434816    11.00000    0.01883    0.01539 =
         0.01731    0.00019   -0.00630   -0.00493
AFIX  43
H57   2    0.810838    0.502633    0.395848    11.00000   -1.20000
AFIX   0
C58   1    0.416678    0.686699    0.421483    11.00000    0.01626    0.01328 =
         0.01656    0.00013   -0.00299   -0.00795
C59   1    0.297710    0.738798    0.472541    11.00000    0.01775    0.01913 =
         0.01844   -0.00169   -0.00097   -0.00698
AFIX  43
H59   2    0.281176    0.737155    0.532950    11.00000   -1.20000
AFIX   0
C29   1    0.985371    0.648711    0.380388    11.00000    0.06836    0.07464 =
         0.05832    0.04034   -0.04988   -0.05825
PART 1

F9    5    1.102832    0.605809    0.350021    21.00000    0.06365    0.09176 =
         0.06372   -0.00701   -0.04020   -0.00356
F8    5    0.983572    0.729807    0.414201    21.00000    0.04644    0.06266 =
         0.03836    0.01124   -0.03174   -0.03219
F7    5    0.929504    0.607255    0.448558    21.00000    0.06859    0.05172 =
         0.05740    0.00703   -0.03318   -0.02160
PART 0
PART 2

F7B   5    0.902159    0.641467    0.455710   -21.00000    0.06997    0.05320 =
         0.03051    0.01558   -0.03613   -0.02349
F8B   5    1.062276    0.687595    0.383951   -21.00000    0.11358    0.10925 =
         0.12628    0.08049   -0.10895   -0.09135
F9B   5    1.065323    0.554342    0.363989   -21.00000    0.05034    0.07603 =
         0.07872    0.02752   -0.05069   -0.00978
PART 0
HKLF 4


REM  RF1615  [PrL3(bipy)2]  in P-1
REM R1 =  0.0276 for   10457 Fo > 4sig(Fo)  and  0.0318 for all   11469 data
REM    767 parameters refined using     66 restraints

END

WGHT      0.0204      2.7323

REM Instructions for potential hydrogen bonds
HTAB C018 O1
EQIV $1 -x+2, -y+1, -z+1
HTAB C56 F9_$1

REM Highest difference peak  1.085,  deepest hole -0.968,  1-sigma level  0.076
Q1    1   1.1222  0.6555  0.3387  11.00000  0.05    1.09
Q2    1   0.6539  0.6425  0.2853  11.00000  0.05    0.87
Q3    1   1.0673  0.6158  0.3666  11.00000  0.05    0.77
Q4    1   0.7470  0.6853  0.1808  11.00000  0.05    0.71
Q5    1   0.6959  0.6405  0.1824  11.00000  0.05    0.67
Q6    1   0.9598  0.7700  0.4225  11.00000  0.05    0.65
Q7    1   1.0956  0.5299  0.3224  11.00000  0.05    0.58
Q8    1   0.9620  0.6700  0.4416  11.00000  0.05    0.58
Q9    1   0.9830  0.6341  0.4285  11.00000  0.05    0.53
Q10   1   0.7604  0.6180  0.2741  11.00000  0.05    0.51
Q11   1   0.6599  0.6791  0.1934  11.00000  0.05    0.50
Q12   1   0.7016  0.6997  0.2732  11.00000  0.05    0.49
;
_shelx_res_checksum   15222

_shelx_hkl_file
;
  -2   0   0  137.19   10.80
  -2   0   0  145.99   10.40
  -2   0   0  134.09   11.20
  -2   0   0  176.08   11.80
  -2   0   0  164.18   11.60
  -2   0   0  142.09   11.20
  -2   0   0  136.19   11.70
  -2   0   0  142.49   11.20
  -2   0   0  136.89   12.10
   2   0   0  151.98   11.90
   2   0   0  142.09   11.10
   2   0   0  147.59   11.10
   2   0   0  137.49   10.60
   2   0   0  147.79   11.40
   2   0   0  136.39   11.00
   2   0   0  161.98   11.20
   2   0   0  152.48   11.00
   2   0   0  140.29   11.20
   2   0   0  137.39   10.30
   2   0   0  144.09   10.40
  -3   0   0   60.99    5.90
  -3   0   0   79.59    9.00
  -3   0   0   68.79    7.00
  -3   0   0   57.79    8.20
  -3   0   0   65.89    6.90
  -3   0   0   80.19    9.90
  -3   0   0   78.19    6.80
  -3   0   0   56.99    7.60
   3   0   0   70.29    7.20
   3   0   0   67.79    6.80
   3   0   0   71.09    6.80
   3   0   0   71.19    7.10
   3   0   0   88.19    9.70
   3   0   0   71.69    5.90
   3   0   0   68.79    6.60
   3   0   0   72.59    6.80
   3   0   0   63.39    7.30
   3   0   0   65.09    6.10
   3   0   0   62.79    5.90
  -4   0   0    1.40    2.20
  -4   0   0    3.80    2.20
  -4   0   0    0.20    1.40
  -4   0   0    0.10    2.90
  -4   0   0    4.00    3.30
  -4   0   0    0.30    1.60
  -4   0   0    2.30    2.40
   4   0   0    3.10    1.90
   4   0   0    2.40    1.80
   4   0   0    0.70    1.70
   4   0   0    3.40    2.00
   4   0   0    1.20    2.00
   4   0   0    1.60    1.50
   4   0   0    0.00    0.90
   4   0   0    1.10    1.40
   4   0   0    1.70    1.80
   4   0   0    1.30    1.80
   4   0   0   -1.20    1.90
  -5   0   0  708.03   53.69
  -5   0   0  670.43   50.39
  -5   0   0  624.04   53.79
  -5   0   0  767.32   53.39
  -5   0   0  755.12   52.29
  -5   0   0  693.73   55.29
   5   0   0  774.32   51.39
   5   0   0  695.43   50.69
   5   0   0  675.13   52.39
   5   0   0  832.62   54.59
   5   0   0  791.82   52.89
   5   0   0  784.62   52.79
   5   0   0  743.53   51.89
   5   0   0  841.62   52.79
   5   0   0  815.32   52.39
   5   0   0  754.62   50.69
   5   0   0  731.83   50.89
  -6   0   0   30.20    8.70
  -6   0   0   55.09    9.00
  -6   0   0   43.30    9.00
  -6   0   0   33.20    9.50
  -6   0   0   49.99    8.10
  -6   0   0   32.40    5.50
   6   0   0   52.59    9.60
   6   0   0   54.59    8.50
   6   0   0   48.00    7.20
   6   0   0   55.39    6.50
   6   0   0   48.00    7.20
   6   0   0   53.69    8.50
   6   0   0   50.59    6.30
   6   0   0   51.29    7.90
   6   0   0   55.89    6.80
  -7   0   0  131.39   21.10
  -7   0   0  169.68   14.90
  -7   0   0  158.68   18.40
  -7   0   0  185.28   18.30
  -7   0   0  144.69   22.60
  -7   0   0  195.28   22.50
   7   0   0  174.98   17.20
   7   0   0  187.28   15.90
   7   0   0  193.48   16.60
   7   0   0  183.68   15.40
   7   0   0  164.28   16.80
   7   0   0  196.98   18.80
   7   0   0  193.88   15.20
   7   0   0  200.38   16.60
   7   0   0  194.58   14.80
  -8   0   0  397.76   31.30
  -8   0   0  338.67   26.10
  -8   0   0  258.07   31.00
  -8   0   0  299.57   31.10
  -8   0   0  314.17   28.70
  -8   0   0  320.47   33.90
   8   0   0  349.37   26.50
   8   0   0  349.27   26.50
   8   0   0  364.96   30.30
   8   0   0  347.17   24.80
   8   0   0  368.86   26.40
   8   0   0  356.46   27.60
   8   0   0  344.07   28.70
  -9   0   0    3.90    5.10
  -9   0   0    4.50    6.80
  -9   0   0    3.10    4.00
  -9   0   0    1.10    3.00
  -9   0   0    3.20    4.80
  -9   0   0    4.60    5.90
  -9   0   0    3.00    6.70
   9   0   0    7.50    5.30
   9   0   0    3.20    1.50
   9   0   0   -0.10    1.90
   9   0   0    6.10    3.60
   9   0   0    1.30    3.80
   9   0   0    1.50    2.60
 -10   0   0  317.47   36.40
 -10   0   0  262.47   27.40
 -10   0   0  209.48   33.00
 -10   0   0  162.18   29.90
 -10   0   0  275.07   22.10
 -10   0   0  257.37   24.70
 -10   0   0  270.07   30.20
  10   0   0  342.67   25.80
 -11   0   0   15.20   11.00
 -11   0   0   50.89   17.60
 -11   0   0   67.79   14.70
 -11   0   0   41.40   10.40
  11   0   0   38.80    8.60
 -12   0   0  409.06   34.80
 -12   0   0  245.18   41.00
 -12   0   0  281.77   45.80
  12   0   0  404.46   30.10
  12   0   0  424.16   37.00
 -13   0   0   10.80   12.20
 -13   0   0   20.40   14.20
 -13   0   0   15.70    9.20
  13   0   0   23.80   17.00
 -14   0   0   22.90   16.60
 -14   0   0   29.30   17.60
 -14   1   0   27.30   19.00
 -14   1   0   22.00   16.30
  13  -1   0  127.79   22.50
 -13   1   0   45.00   19.10
 -13   1   0  117.19   19.20
 -13   1   0   94.49   24.90
  12  -1   0   37.70    8.30
  12  -1   0   69.69   16.10
 -12   1   0   34.80   16.20
 -12   1   0   44.10   12.20
 -12   1   0   30.40   16.20
  11  -1   0   49.40   13.00
  11  -1   0   43.10    8.00
 -11   1   0   45.00   12.20
 -11   1   0   15.10    8.20
 -11   1   0   17.90   13.40
 -11   1   0   27.40   13.30
  10  -1   0   22.00    6.60
 -10   1   0   19.00    5.30
 -10   1   0   23.70   11.80
 -10   1   0    3.60    7.90
 -10   1   0   20.30    8.70
 -10   1   0    9.90    7.80
 -10   1   0   28.90    8.70
   9  -1   0  127.49   15.10
   9  -1   0   92.09   15.90
  -9   1   0  110.39   17.30
  -9   1   0  103.89   11.90
  -9   1   0   67.99   16.50
  -9   1   0  150.28   21.70
  -9   1   0  109.29   16.60
  -9   1   0  102.49   21.30
  -9   1   0  111.19   15.20
   8  -1   0  366.46   26.70
   8  -1   0  293.07   26.90
   8  -1   0  344.37   24.10
   8  -1   0  359.56   29.20
   8  -1   0  340.17   22.70
   8  -1   0  305.47   25.10
   8  -1   0  332.87   24.20
  -8   1   0  300.47   24.80
  -8   1   0  315.47   29.50
  -8   1   0  345.97   31.40
  -8   1   0  241.38   34.70
  -8   1   0  359.16   29.20
  -8   1   0  265.47   30.90
  -8   1   0  328.87   27.60
   7  -1   0    2.70    3.00
   7  -1   0    6.60    2.30
   7  -1   0   -3.00    3.10
   7  -1   0    2.50    2.80
   7  -1   0    9.60    3.60
   7  -1   0    5.90    3.80
   7  -1   0    2.90    2.70
   7  -1   0    3.00    3.10
  -7   1   0    5.20    3.80
  -7   1   0    2.40    5.40
  -7   1   0   10.70    7.40
  -7   1   0    0.90    3.30
  -7   1   0    4.90    3.80
  -7   1   0    3.10    4.30
  -7   1   0    1.90    2.40
   6  -1   0  198.58   15.80
   6  -1   0  194.18   18.50
   6  -1   0  183.68   17.00
   6  -1   0  198.48   16.30
   6  -1   0  189.08   16.10
   6  -1   0  201.68   15.30
   6  -1   0  183.68   15.20
   6  -1   0  186.28   14.60
   6  -1   0  190.88   17.00
  -6   1   0  189.78   18.10
  -6   1   0  200.68   18.80
  -6   1   0  142.69   20.40
  -6   1   0  164.68   14.80
  -6   1   0  169.28   22.70
  -6   1   0  199.18   17.20
  -6   1   0  205.28   17.60
   5  -1   0   58.89    6.80
   5  -1   0   57.99    6.40
   5  -1   0   54.39    7.90
   5  -1   0   43.80    6.00
   5  -1   0   63.99    8.20
   5  -1   0   45.30    7.50
   5  -1   0   50.19    6.20
   5  -1   0   50.49    6.90
   5  -1   0   50.29    6.90
   5  -1   0   55.09    9.30
  -5   1   0   46.10    9.40
  -5   1   0   55.69    8.50
  -5   1   0   53.69   11.10
  -5   1   0   53.09    7.70
  -5   1   0   48.80    8.30
  -5   1   0   48.50    6.00
  -5   1   0   67.09    8.70
   4  -1   0  350.26   25.30
   4  -1   0  305.17   23.60
   4  -1   0  333.97   22.60
   4  -1   0  312.37   22.10
   4  -1   0  302.67   23.50
   4  -1   0  323.47   23.50
   4  -1   0  332.97   24.00
   4  -1   0  320.37   22.90
   4  -1   0  301.17   22.80
   4  -1   0  327.07   22.10
   4  -1   0  299.57   21.90
  -4   1   0  320.07   24.10
  -4   1   0  307.87   23.30
  -4   1   0  290.67   23.30
  -4   1   0  299.97   21.90
  -4   1   0  266.57   25.50
  -4   1   0  300.57   24.00
  -4   1   0  288.77   24.80
  -4   1   0  307.27   23.30
  -4   1   0  250.57   24.50
   3  -1   0   39.00    5.00
   3  -1   0   42.00    5.50
   3  -1   0   34.00    5.40
   3  -1   0   32.70    4.80
   3  -1   0   39.50    5.70
   3  -1   0   43.90    4.80
   3  -1   0   36.80    4.20
   3  -1   0   37.40    5.50
   3  -1   0   38.10    4.40
   3  -1   0   38.80    6.60
   3  -1   0   47.00    5.40
  -3   1   0   54.99    8.00
  -3   1   0   40.30    5.60
  -3   1   0   33.00    5.00
  -3   1   0   29.90    5.20
  -3   1   0   38.50    4.40
  -3   1   0   38.00    6.80
  -3   1   0   31.80    5.30
  -3   1   0   37.60    5.50
  -3   1   0   43.50    4.50
  -3   1   0   32.10    6.70
  -3   1   0   42.10    5.50
   2  -1   0    2.10    1.10
   2  -1   0    1.00    1.20
   2  -1   0    2.70    2.10
   2  -1   0    2.00    1.80
   2  -1   0    0.80    1.30
   2  -1   0    0.90    1.00
   2  -1   0    1.90    1.10
   2  -1   0    0.10    1.10
   2  -1   0    0.60    1.10
   2  -1   0    2.00    1.10
   2  -1   0    3.50    1.60
  -2   1   0    2.00    1.10
  -2   1   0   -0.40    0.90
  -2   1   0    3.80    1.80
  -2   1   0    1.20    1.00
  -2   1   0    3.30    2.40
  -2   1   0    1.20    1.30
  -2   1   0    1.50    1.90
  -2   1   0    0.80    1.20
  -2   1   0    0.20    1.20
  -2   1   0    2.10    1.40
  -2   1   0    1.40    2.20
  -2   1   0    1.20    1.20
   1  -1   0  980.40   60.49
   1  -1   0  932.91   60.39
   1  -1   0  794.72   59.79
   1  -1   0  821.72   60.29
   1  -1   0  968.40   60.09
   1  -1   0  959.00   60.19
   1  -1   0  965.60   60.59
   1  -1   0  930.11   60.49
   1  -1   0  922.61   60.19
   1  -1   0  955.70   59.69
  -1   1   0  952.10   60.59
  -1   1   0  742.83   60.89
  -1   1   0  849.52   59.69
  -1   1   0  914.81   60.39
  -1   1   0  747.23   60.59
  -1   1   0  909.21   59.89
  -1   1   0  917.51   60.39
  -1   1   0  939.91   60.59
  -1   1   0 1032.20   60.39
  -1   1   0  988.20   60.89
  -1   1   0  930.21   60.59
   0  -1   0    0.00    0.10
   0  -1   0    0.10    0.10
   0  -1   0   -0.10    0.20
   0  -1   0    0.10    0.10
   0  -1   0    0.00    0.20
   0  -1   0    0.00    0.10
   0  -1   0    0.00    0.20
   0  -1   0    0.00    0.20
   0  -1   0   -0.10    0.20
   0  -1   0    0.10    0.20
   0  -1   0    0.00    0.20
   0  -1   0   -0.10    0.20
   0  -1   0   -0.10    0.10
   0  -1   0    0.30    0.30
   0   1   0    0.20    0.20
   0   1   0    0.10    0.20
   0   1   0    0.00    0.10
   0   1   0   -0.30    0.30
   0   1   0    0.00    0.20
   0   1   0   -0.10    0.20
   0   1   0    0.10    0.20
   0   1   0    0.00    0.10
   0   1   0    0.00    0.30
   0   1   0   -0.10    0.10
   0   1   0   -0.10    0.20
   0   1   0    0.10    0.30
   0   1   0    0.30    0.30
   0   1   0   -0.10    0.30
  -2  -1   0  782.42   51.99
  -2  -1   0  769.92   52.39
  -2  -1   0  768.12   52.79
  -2  -1   0  763.72   51.59
  -2  -1   0  799.32   53.19
  -2  -1   0  830.92   52.59
  -2  -1   0  765.02   51.99
   2   1   0  698.13   52.69
   2   1   0  791.52   52.39
   2   1   0  783.12   52.29
   2   1   0  824.92   52.69
   2   1   0  772.32   51.89
   2   1   0  749.53   52.29
   2   1   0  911.61   53.39
   2   1   0  786.72   51.59
   2   1   0  686.13   51.89
  -3  -1   0  829.12   54.99
  -3  -1   0  762.22   56.09
  -3  -1   0  825.42   56.89
  -3  -1   0  853.71   55.89
  -3  -1   0  743.43   55.39
  -3  -1   0  795.12   54.29
   3   1   0  808.32   54.69
   3   1   0  824.52   55.49
   3   1   0  846.12   55.79
   3   1   0  925.61   56.89
   3   1   0  787.32   55.09
   3   1   0  812.52   54.39
   3   1   0  819.82   55.89
   3   1   0  785.52   55.39
  -4  -1   0 1097.89   72.39
  -4  -1   0 1005.50   73.89
  -4  -1   0 1031.00   72.99
  -4  -1   0  976.00   71.09
  -4  -1   0 1023.70   74.69
  -4  -1   0 1058.89   74.19
  -4  -1   0 1068.29   73.29
   4   1   0 1090.39   72.99
   4   1   0 1147.79   74.29
   4   1   0 1014.00   72.49
   4   1   0 1085.29   71.79
   4   1   0 1082.49   71.49
   4   1   0 1042.30   72.19
   4   1   0 1147.29   73.29
   4   1   0 1130.69   73.19
   4   1   0 1119.49   73.29
  -5  -1   0  355.66   33.30
  -5  -1   0  399.56   33.70
  -5  -1   0  407.96   30.40
  -5  -1   0  428.96   31.90
  -5  -1   0  449.16   33.00
  -5  -1   0  410.96   34.70
   5   1   0  419.66   30.90
   5   1   0  454.75   30.60
   5   1   0  454.35   30.90
   5   1   0  538.75   33.20
   5   1   0  408.16   31.90
   5   1   0  471.95   32.30
   5   1   0  423.16   31.50
   5   1   0  433.56   32.50
   5   1   0  465.65   32.90
   5   1   0  424.16   33.60
   5   1   0  453.85   32.60
  -6  -1   0  892.81   64.49
  -6  -1   0  868.31   66.09
  -6  -1   0  761.32   65.29
  -6  -1   0  847.62   61.39
  -6  -1   0  922.71   63.59
  -6  -1   0  890.71   67.39
   6   1   0  912.81   61.89
   6   1   0  931.31   64.09
   6   1   0  976.90   65.79
   6   1   0  878.31   63.99
   6   1   0  923.91   61.49
   6   1   0  995.70   63.99
   6   1   0  920.71   61.99
   6   1   0  870.71   62.99
   6   1   0  983.30   63.89
  -7  -1   0  226.38   28.70
  -7  -1   0  246.28   20.10
  -7  -1   0  222.98   24.80
  -7  -1   0  241.98   24.80
  -7  -1   0  245.58   23.10
  -7  -1   0  252.67   22.20
   7   1   0  272.17   20.70
   7   1   0  263.37   20.10
   7   1   0  252.87   21.80
   7   1   0  271.97   20.30
   7   1   0  274.37   22.10
   7   1   0  251.67   21.30
   7   1   0  273.37   24.20
   7   1   0  317.67   23.50
   7   1   0  275.97   23.00
  -8  -1   0   -1.40    2.30
  -8  -1   0   -0.10    4.80
  -8  -1   0   -1.60    3.10
  -8  -1   0   -2.20    5.40
  -8  -1   0    1.80    3.60
  -8  -1   0   -3.10    5.40
   8   1   0    2.10    2.00
   8   1   0    0.00    3.30
   8   1   0    2.50    3.00
   8   1   0    0.50    3.00
   8   1   0   -4.20    3.40
   8   1   0    0.50    2.70
   8   1   0   -0.90    2.60
  -9  -1   0  167.48   27.60
  -9  -1   0  177.48   26.80
  -9  -1   0  223.88   22.90
  -9  -1   0  206.28   24.00
  -9  -1   0  149.59   25.60
  -9  -1   0  221.68   18.70
   9   1   0  231.28   21.60
   9   1   0  239.88   17.30
   9   1   0  226.08   22.60
   9   1   0  239.88   18.90
   9   1   0  218.68   18.80
   9   1   0  239.78   20.60
   9   1   0  249.38   21.10
 -10  -1   0   16.60    7.70
 -10  -1   0   33.20    6.60
 -10  -1   0   27.10    9.00
 -10  -1   0   59.29   14.60
 -10  -1   0   20.00   10.40
 -10  -1   0   27.60   12.20
  10   1   0   39.30    9.00
  10   1   0   29.10    4.60
 -11  -1   0  109.99   24.70
 -11  -1   0  187.88   24.90
 -11  -1   0  121.29   24.80
 -11  -1   0  187.38   21.50
  11   1   0  162.88   19.60
 -12  -1   0   86.89   14.80
 -12  -1   0   50.69   18.80
 -12  -1   0   46.80   17.10
  12   1   0   92.39   16.20
  12   1   0   93.19   13.20
 -13  -1   0    6.80   12.10
 -13  -1   0   -7.90    8.70
 -13  -1   0   -2.60    6.00
  13   1   0    1.70    3.90
 -14  -1   0   94.39   25.70
 -14  -1   0  153.78   32.60
 -15  -1   0   58.29   22.80
 -14   2   0   47.60   20.50
 -14   2   0   97.39   28.70
  13  -2   0   -3.50    8.90
 -13   2   0   -5.60   12.10
 -13   2   0   -3.00   10.80
  12  -2   0  406.76   40.40
 -12   2   0  202.08   37.40
 -12   2   0  215.28   37.20
 -12   2   0  348.77   30.60
  11  -2   0  253.37   19.70
  11  -2   0  278.17   32.50
 -11   2   0  217.08   35.70
 -11   2   0  255.17   28.60
 -11   2   0  157.08   30.00
  10  -2   0  145.79   14.70
 -10   2   0  101.59   21.90
 -10   2   0  171.58   23.70
 -10   2   0  154.38   19.60
 -10   2   0   85.39   22.10
   9  -2   0   98.59   13.30
  -9   2   0  110.89   17.60
  -9   2   0   84.59   19.80
  -9   2   0   76.39   15.90
  -9   2   0  117.29   12.40
  -9   2   0  110.49   16.90
  -9   2   0   68.19   17.30
  -9   2   0   89.69   14.50
   8  -2   0   30.70    7.30
   8  -2   0   42.70    9.10
   8  -2   0   42.40    7.20
  -8   2   0   43.30   10.00
  -8   2   0   14.90    9.50
  -8   2   0   50.89   10.80
  -8   2   0   41.10    6.70
  -8   2   0   24.50   12.00
  -8   2   0   41.90   10.60
  -8   2   0   36.40    8.70
   7  -2   0  301.37   25.20
   7  -2   0  270.07   23.40
   7  -2   0  307.77   22.80
   7  -2   0  297.07   21.00
   7  -2   0  280.67   20.60
   7  -2   0  274.47   21.50
   7  -2   0  297.27   19.50
  -7   2   0  241.98   25.00
  -7   2   0  246.98   24.90
  -7   2   0  257.27   32.70
  -7   2   0  284.57   24.90
  -7   2   0  206.18   28.20
  -7   2   0  277.47   24.10
  -7   2   0  242.18   21.10
   6  -2   0  474.95   36.40
   6  -2   0  474.85   38.30
   6  -2   0  577.44   38.00
   6  -2   0  488.55   36.40
   6  -2   0  504.75   38.60
   6  -2   0  545.95   36.70
   6  -2   0  541.55   35.70
   6  -2   0  580.54   40.70
   6  -2   0  590.44   37.40
  -6   2   0  403.56   42.00
  -6   2   0  527.75   40.50
  -6   2   0  377.06   40.40
  -6   2   0  517.75   39.00
  -6   2   0  579.14   40.00
  -6   2   0  498.65   39.10
  -6   2   0  541.45   40.50
  -6   2   0  498.15   36.40
   5  -2   0   34.60    4.70
   5  -2   0   36.00    6.00
   5  -2   0   34.00    6.40
   5  -2   0   39.10    8.10
   5  -2   0   40.30    5.80
   5  -2   0   33.40    4.80
   5  -2   0   36.40    5.10
   5  -2   0   38.50    5.20
   5  -2   0   36.50    6.40
   5  -2   0   48.20    6.50
  -5   2   0   36.80    6.70
  -5   2   0   19.80    7.80
  -5   2   0   38.70    7.30
  -5   2   0   32.20    6.90
  -5   2   0   33.40    6.70
  -5   2   0   39.40    5.40
  -5   2   0   34.50    4.90
  -5   2   0   37.80    7.00
  -5   2   0   22.80    7.50
   4  -2   0  480.15   32.10
   4  -2   0  500.25   35.40
   4  -2   0  471.95   31.90
   4  -2   0  459.85   32.70
   4  -2   0  450.15   32.00
   4  -2   0  471.25   33.20
   4  -2   0  447.56   32.40
   4  -2   0  491.45   34.30
   4  -2   0  479.55   31.90
   4  -2   0  424.06   33.40
   4  -2   0  487.55   33.80
  -4   2   0  358.36   35.50
  -4   2   0  475.85   33.90
  -4   2   0  430.96   33.40
  -4   2   0  428.86   33.60
  -4   2   0  445.26   33.50
  -4   2   0  452.65   34.40
  -4   2   0  472.45   31.80
  -4   2   0  457.85   32.10
   3  -2   0   83.29    7.50
   3  -2   0   87.09    8.30
   3  -2   0  100.29   11.30
   3  -2   0   78.49    6.80
   3  -2   0   62.99    8.40
   3  -2   0   78.29    7.40
   3  -2   0   85.49    7.10
   3  -2   0   91.59    7.50
   3  -2   0   76.69    7.90
   3  -2   0   88.19    9.70
   3  -2   0   86.59    7.10
  -3   2   0   72.89    9.10
  -3   2   0   78.99    9.00
  -3   2   0   73.29   11.10
  -3   2   0   68.49    8.60
  -3   2   0   79.49    6.80
  -3   2   0   86.59    8.50
  -3   2   0   87.19    8.80
  -3   2   0   60.69    9.70
  -3   2   0   87.99    7.20
  -3   2   0   77.99    7.90
   2  -2   0 1518.05  104.99
   2  -2   0 1650.93  105.59
   2  -2   0 1579.44  105.19
   2  -2   0 1599.74  104.09
   2  -2   0 1622.14  104.09
   2  -2   0 1428.56  105.09
   2  -2   0 1719.03  104.89
   2  -2   0 1587.54  104.59
   2  -2   0 1656.63  105.29
   2  -2   0 1594.74  103.79
   2  -2   0 1629.54  104.59
   2  -2   0 1433.76  106.09
   2  -2   0 1606.54  104.29
  -2   2   0 1487.95  105.09
  -2   2   0 1614.94  105.09
  -2   2   0 1510.85  104.99
  -2   2   0 1585.34  104.19
  -2   2   0 1672.53  104.99
  -2   2   0 1541.15  103.79
  -2   2   0 1609.54  105.69
  -2   2   0 1590.14  105.49
  -2   2   0 1544.75  106.19
   1  -2   0 2513.45  172.38
   1  -2   0 2574.44  172.08
   1  -2   0 2713.93  172.48
   1  -2   0 2623.64  172.88
   1  -2   0 2715.53  172.38
   1  -2   0 2835.72  173.28
   1  -2   0 2591.44  172.08
   1  -2   0 2499.45  172.68
   1  -2   0 2572.44  172.88
   1  -2   0 2795.12  173.08
   1  -2   0 2601.94  171.78
  -1   2   0 2601.44  173.18
  -1   2   0 2652.83  172.78
  -1   2   0 2740.73  173.18
  -1   2   0 2607.84  171.88
  -1   2   0 2532.55  173.58
  -1   2   0 2553.74  172.68
  -1   2   0 2587.84  172.88
  -1   2   0 2669.03  172.08
  -1   2   0 2668.03  173.08
  -1   2   0 2625.94  172.18
  -1   2   0 2687.13  172.58
   0  -2   0  227.58   15.60
   0  -2   0  209.68   15.20
   0  -2   0  185.98   15.40
   0  -2   0  212.98   15.70
   0  -2   0  218.68   15.10
   0  -2   0  219.48   15.60
   0  -2   0  212.28   15.30
   0  -2   0  216.78   15.80
   0  -2   0  207.58   15.10
   0  -2   0  225.78   14.90
   0  -2   0  215.08   15.80
   0  -2   0  217.78   16.00
   0  -2   0  244.28   16.20
   0  -2   0  207.48   15.40
   0   2   0  242.38   15.30
   0   2   0  233.28   15.60
   0   2   0  215.28   15.80
   0   2   0  216.58   15.20
   0   2   0  239.98   15.80
   0   2   0  214.28   14.90
   0   2   0  228.18   16.30
   0   2   0  222.08   15.20
   0   2   0  214.78   15.30
   0   2   0  203.68   15.70
   0   2   0  215.68   15.60
   0   2   0  224.28   15.80
  -1  -2   0  857.71   55.99
  -1  -2   0  880.41   56.49
  -1  -2   0  820.82   56.09
  -1  -2   0  909.11   56.79
  -1  -2   0  846.12   56.49
  -1  -2   0  685.73   57.19
  -1  -2   0  859.51   56.09
  -1  -2   0  881.11   56.99
  -1  -2   0  798.62   56.09
   1   2   0  856.91   56.19
   1   2   0  771.92   57.49
   1   2   0  875.61   56.09
   1   2   0  962.00   56.89
   1   2   0  878.01   56.69
   1   2   0  870.81   56.09
   1   2   0  855.71   56.09
   1   2   0  712.33   56.29
   1   2   0  922.71   57.09
  -2  -2   0   30.50    3.80
  -2  -2   0   28.50    5.10
  -2  -2   0   20.70    3.50
  -2  -2   0   22.20    2.90
  -2  -2   0   31.00    4.40
  -2  -2   0   23.30    4.30
  -2  -2   0   27.40    3.60
  -2  -2   0   26.00    4.20
  -2  -2   0   28.90    3.70
   2   2   0   28.80    4.60
   2   2   0   29.70    3.60
   2   2   0   28.60    4.20
   2   2   0   16.70    4.20
   2   2   0   23.70    3.70
   2   2   0   28.90    3.00
   2   2   0   26.70    3.30
  -3  -2   0  389.46   29.10
  -3  -2   0  380.66   27.80
  -3  -2   0  434.36   28.90
  -3  -2   0  369.46   27.20
  -3  -2   0  395.86   29.50
  -3  -2   0  388.76   28.40
  -3  -2   0  387.56   27.00
   3   2   0  336.37   27.40
   3   2   0  401.46   28.50
   3   2   0  402.76   29.70
   3   2   0  402.86   28.00
   3   2   0  402.06   28.70
   3   2   0  410.76   27.40
   3   2   0  394.56   28.20
   3   2   0  447.06   29.70
  -4  -2   0 1379.86   90.49
  -4  -2   0 1298.67   90.59
  -4  -2   0 1351.66   91.59
  -4  -2   0 1338.97   93.29
  -4  -2   0 1352.96   93.99
  -4  -2   0 1309.07   92.29
   4   2   0 1353.66   92.29
   4   2   0 1401.06   91.29
   4   2   0 1355.46   90.89
   4   2   0 1286.37   91.59
   4   2   0 1375.26   91.89
   4   2   0 1327.57   93.09
   4   2   0 1597.04   94.19
   4   2   0 1373.36   92.29
   4   2   0 1423.26   92.69
  -5  -2   0  190.48   14.30
  -5  -2   0  164.98   15.80
  -5  -2   0  171.38   17.00
  -5  -2   0  201.78   15.60
  -5  -2   0  180.18   18.00
   5   2   0  169.58   15.60
   5   2   0  201.08   17.40
   5   2   0  166.08   16.00
   5   2   0  183.48   14.70
   5   2   0  222.78   16.80
   5   2   0  173.78   14.30
   5   2   0  175.68   15.20
   5   2   0  168.38   15.50
  -6  -2   0  430.26   38.60
  -6  -2   0  454.15   33.90
  -6  -2   0  497.35   35.80
  -6  -2   0  359.96   37.30
  -6  -2   0  470.45   38.40
  -6  -2   0  435.96   36.30
   6   2   0  444.86   35.60
   6   2   0  528.25   37.00
   6   2   0  488.15   36.70
   6   2   0  556.24   38.70
   6   2   0  529.35   34.70
   6   2   0  494.95   36.40
   6   2   0  543.65   36.80
   6   2   0  496.05   34.70
  -7  -2   0    2.10    4.50
  -7  -2   0    0.70    4.60
  -7  -2   0    1.10    4.50
  -7  -2   0    2.20    3.20
  -7  -2   0    4.50    3.80
  -7  -2   0    5.00    2.90
   7   2   0    4.60    3.20
   7   2   0    3.10    2.30
   7   2   0    7.70    3.10
   7   2   0    4.50    3.40
   7   2   0    1.70    3.00
   7   2   0    4.30    3.60
   7   2   0    8.20    6.90
   7   2   0   -1.40    3.50
  -8  -2   0  925.21   77.09
  -8  -2   0 1004.50   74.59
  -8  -2   0 1002.00   70.49
  -8  -2   0  960.70   78.09
  -8  -2   0 1052.99   73.59
  -8  -2   0  800.72   75.19
   8   2   0 1203.88   74.09
   8   2   0 1115.89   70.79
   8   2   0 1034.60   72.29
   8   2   0 1041.20   71.19
   8   2   0 1025.20   73.89
   8   2   0 1133.59   75.99
  -9  -2   0  383.46   34.80
  -9  -2   0  327.87   37.80
  -9  -2   0  369.76   30.40
  -9  -2   0  319.97   40.20
  -9  -2   0  297.17   35.70
  -9  -2   0  439.66   34.50
   9   2   0  457.55   36.10
   9   2   0  433.06   32.70
   9   2   0  430.46   31.90
   9   2   0  451.25   30.30
   9   2   0  386.46   33.60
   9   2   0  477.25   33.80
   9   2   0  436.16   31.70
 -10  -2   0   48.50    8.20
 -10  -2   0   56.79   15.50
 -10  -2   0   64.69   17.30
 -10  -2   0   33.10   12.30
 -10  -2   0   60.99   12.80
 -10  -2   0   57.49   11.90
  10   2   0   63.79   11.30
  10   2   0   47.40   10.40
  10   2   0   61.79    7.00
  10   2   0   63.69    8.70
 -11  -2   0  207.98   32.80
 -11  -2   0  300.77   29.20
 -11  -2   0  254.27   37.70
  11   2   0  297.57   26.40
 -12  -2   0   93.79   24.20
 -12  -2   0   87.59   21.40
 -12  -2   0  104.49   17.00
  12   2   0  159.28   18.60
 -13  -2   0  150.68   32.50
 -13  -2   0  160.78   30.90
 -13  -2   0  236.88   27.00
  13   2   0  227.08   20.70
 -14  -2   0   31.00   10.50
 -14  -2   0   11.00   13.00
 -14  -2   0   13.30   15.30
 -15  -2   0   28.30   17.80
 -15  -2   0   37.70   19.80
 -13   3   0   -3.80   11.20
 -13   3   0   33.50   17.10
  12  -3   0   41.60   14.00
 -12   3   0   19.10   13.00
 -12   3   0   34.80   12.40
 -12   3   0   29.60   16.80
  11  -3   0   21.50   10.50
 -11   3   0   14.40   11.80
 -11   3   0   -0.50    5.20
 -11   3   0    6.20   11.40
  10  -3   0  767.32   50.89
  10  -3   0  777.72   59.89
 -10   3   0  750.02   55.99
 -10   3   0  680.43   58.79
 -10   3   0  500.95   59.99
   9  -3   0    0.60    3.60
  -9   3   0   11.30    9.10
  -9   3   0   18.40   10.70
  -9   3   0    8.90    6.20
  -9   3   0   11.50    6.50
  -9   3   0    2.10    5.50
  -9   3   0   10.90    4.20
   8  -3   0   59.59    9.20
   8  -3   0   17.10    6.20
  -8   3   0   45.90   14.50
  -8   3   0   48.50   11.10
  -8   3   0   25.50   11.00
  -8   3   0   64.99   11.10
  -8   3   0   48.00   11.40
  -8   3   0   49.10    7.40
  -8   3   0   49.50   11.40
   7  -3   0  210.58   18.50
   7  -3   0  255.77   21.60
   7  -3   0  223.08   19.70
   7  -3   0  207.88   18.60
  -7   3   0  232.38   18.10
  -7   3   0  226.48   22.40
  -7   3   0  174.98   27.20
  -7   3   0  223.18   21.00
  -7   3   0  162.18   25.40
  -7   3   0  208.88   20.60
  -7   3   0  235.78   24.70
  -7   3   0  258.37   23.40
   6  -3   0   46.10    8.30
   6  -3   0   64.49    5.20
   6  -3   0   57.79    5.00
   6  -3   0   57.99    8.00
   6  -3   0   55.09    8.70
   6  -3   0   46.50    9.40
   6  -3   0   56.49    6.00
   6  -3   0   73.39    7.90
   6  -3   0   62.49    7.30
  -6   3   0   53.09    9.60
  -6   3   0   58.99   10.40
  -6   3   0   52.49    7.40
  -6   3   0   48.80    7.00
  -6   3   0   48.30    9.50
  -6   3   0   52.19   10.00
  -6   3   0   57.69    9.60
  -6   3   0   33.40   10.30
  -6   3   0   30.40   11.00
   5  -3   0  653.43   51.99
   5  -3   0  782.82   51.29
   5  -3   0  751.22   49.70
   5  -3   0  763.62   49.10
   5  -3   0  757.62   50.59
   5  -3   0  738.73   50.69
   5  -3   0  763.02   50.49
   5  -3   0  793.72   51.79
   5  -3   0  774.12   52.79
   5  -3   0  811.92   54.59
  -5   3   0  754.12   53.39
  -5   3   0  716.53   50.39
  -5   3   0  747.03   53.49
  -5   3   0  731.13   50.89
  -5   3   0  735.23   54.29
  -5   3   0  648.24   52.69
  -5   3   0  687.43   52.59
  -5   3   0  545.25   55.19
   4  -3   0    3.60    2.60
   4  -3   0    5.30    2.00
   4  -3   0    2.80    2.50
   4  -3   0    1.50    2.30
   4  -3   0    1.30    1.40
   4  -3   0    2.70    1.90
   4  -3   0    1.50    1.70
   4  -3   0    5.00    3.80
   4  -3   0    3.50    1.80
   4  -3   0    3.00    2.10
  -4   3   0   -2.80    2.80
  -4   3   0   13.30    4.10
  -4   3   0    3.10    2.60
  -4   3   0    1.30    1.80
  -4   3   0    3.20    4.60
  -4   3   0    3.80    2.00
  -4   3   0    1.50    2.40
  -4   3   0    0.80    2.50
  -4   3   0    3.90    2.50
   3  -3   0  672.33   46.90
   3  -3   0  680.63   48.50
   3  -3   0  627.74   45.40
   3  -3   0  706.73   45.40
   3  -3   0  701.13   45.90
   3  -3   0  638.94   46.80
   3  -3   0  651.33   45.00
   3  -3   0  681.53   45.60
   3  -3   0  709.23   47.80
   3  -3   0  677.13   46.70
   3  -3   0  632.34   46.00
   3  -3   0  660.13   47.00
   3  -3   0  660.63   45.50
  -3   3   0  638.74   45.60
  -3   3   0  702.93   46.90
  -3   3   0  668.83   47.20
  -3   3   0  673.13   47.00
  -3   3   0  676.33   47.60
  -3   3   0  664.53   47.90
  -3   3   0  690.13   47.50
  -3   3   0  636.44   45.10
   2  -3   0    2.50    1.70
   2  -3   0    6.00    1.80
   2  -3   0    3.60    1.80
   2  -3   0    1.80    1.40
   2  -3   0    4.90    2.60
   2  -3   0    3.60    1.60
   2  -3   0    3.70    2.20
   2  -3   0    2.00    1.80
   2  -3   0    2.00    1.30
   2  -3   0    4.00    2.40
   2  -3   0    4.60    2.20
   2  -3   0    1.80    1.40
   2  -3   0    8.00    3.70
  -2   3   0    3.40    1.60
  -2   3   0    2.80    3.30
  -2   3   0    3.20    2.30
  -2   3   0    2.70    1.40
  -2   3   0    5.10    2.50
  -2   3   0    4.60    2.40
  -2   3   0    8.30    5.20
  -2   3   0    1.80    1.50
  -2   3   0    5.40    3.40
  -2   3   0    4.30    2.50
  -2   3   0    5.40    2.20
   1  -3   0   70.29    7.30
   1  -3   0   66.49    6.30
   1  -3   0   57.09    6.90
   1  -3   0   67.29    6.10
   1  -3   0   56.89    8.50
   1  -3   0   77.29    6.60
   1  -3   0   71.69    5.70
   1  -3   0   83.19    7.30
   1  -3   0   75.79    7.00
   1  -3   0   75.99    8.20
   1  -3   0   53.69    7.70
   1  -3   0   71.29    6.10
   1  -3   0   71.59    5.90
   1  -3   0   76.39    6.60
  -1   3   0   78.29    6.90
  -1   3   0   55.69    7.70
  -1   3   0   77.99    9.20
  -1   3   0   71.39    8.60
  -1   3   0   80.79    9.50
  -1   3   0   66.59    7.90
  -1   3   0   67.09    7.90
  -1   3   0   71.29    5.90
  -1   3   0   72.79    6.20
  -1   3   0   71.99    6.90
  -1   3   0   70.09    6.00
  -1   3   0   70.99    6.50
   0  -3   0  201.88   15.70
   0  -3   0  214.58   15.00
   0  -3   0  225.78   16.40
   0  -3   0  209.58   15.30
   0  -3   0  212.98   16.10
   0  -3   0  207.48   15.30
   0  -3   0  191.88   15.90
   0  -3   0  214.68   15.70
   0  -3   0  230.18   16.80
   0  -3   0  218.78   16.60
   0  -3   0  209.38   16.20
   0  -3   0  225.68   16.00
   0  -3   0  216.58   16.40
   0  -3   0  220.98   16.40
   0  -3   0  212.98   15.50
   0   3   0  197.58   16.10
   0   3   0  219.58   16.40
   0   3   0  235.78   16.30
   0   3   0  189.38   16.70
   0   3   0  212.48   15.50
   0   3   0  212.08   15.60
   0   3   0  223.58   15.20
   0   3   0  203.48   15.40
   0   3   0  239.68   16.30
   0   3   0  225.18   15.50
   0   3   0  231.78   16.10
   0   3   0  216.68   16.50
  -1  -3   0  640.04   44.10
  -1  -3   0  636.74   44.00
  -1  -3   0  688.33   44.60
  -1  -3   0  651.93   43.10
  -1  -3   0  642.74   43.70
  -1  -3   0  676.53   43.50
  -1  -3   0  664.13   44.60
  -1  -3   0  724.03   44.20
  -1  -3   0  612.24   45.30
  -1  -3   0  617.24   43.30
  -1  -3   0  629.74   43.50
  -1  -3   0  627.54   43.60
  -1  -3   0  678.33   44.30
   1   3   0  625.54   44.30
   1   3   0  701.33   44.90
   1   3   0  635.34   43.40
   1   3   0  663.83   43.80
   1   3   0  621.54   43.60
   1   3   0  549.45   43.70
   1   3   0  724.13   44.60
   1   3   0  663.83   44.10
   1   3   0  603.14   45.40
   1   3   0  626.94   43.50
   1   3   0  653.73   43.60
   1   3   0  626.94   43.10
   1   3   0  642.94   43.70
  -2  -3   0 1191.78   83.19
  -2  -3   0 1305.17   83.59
  -2  -3   0 1263.07   83.29
  -2  -3   0 1323.17   84.09
  -2  -3   0 1252.27   82.79
  -2  -3   0 1341.47   84.59
  -2  -3   0 1234.18   83.39
  -2  -3   0 1105.39   85.49
  -2  -3   0 1366.96   85.09
   2   3   0 1078.29   85.39
   2   3   0 1268.67   83.49
   2   3   0 1166.58   82.99
   2   3   0 1264.77   83.49
   2   3   0 1224.18   82.79
   2   3   0 1389.76   85.09
   2   3   0 1265.07   83.99
   2   3   0 1249.97   83.19
   2   3   0 1188.18   83.29
   2   3   0 1372.46   84.59
  -3  -3   0 3666.73  277.87
  -3  -3   0 4068.59  275.37
  -3  -3   0 4524.25  277.57
  -3  -3   0 4205.78  276.67
  -3  -3   0 4237.88  275.47
  -3  -3   0 4053.49  275.97
  -3  -3   0 4286.07  274.87
   3   3   0 4130.29  274.47
   3   3   0 4503.15  276.67
   3   3   0 4120.69  275.37
   3   3   0 3927.21  277.87
   3   3   0 4402.66  275.07
   3   3   0 4617.84  277.47
   3   3   0 4111.49  275.97
  -4  -3   0   57.89    9.00
  -4  -3   0   40.00    7.30
  -4  -3   0   35.80    6.00
  -4  -3   0   33.40    4.80
  -4  -3   0   41.80    5.00
  -4  -3   0   37.30    5.70
  -4  -3   0   30.30    7.40
  -4  -3   0   39.80    5.90
   4   3   0   39.10    5.80
   4   3   0   46.30    7.70
   4   3   0   36.60    5.20
   4   3   0   48.60    6.80
   4   3   0   39.40    7.50
   4   3   0   48.50    7.40
   4   3   0   37.00    5.40
  -5  -3   0 1130.89   76.59
  -5  -3   0 1152.98   81.09
  -5  -3   0 1120.29   77.89
  -5  -3   0 1138.69   78.99
  -5  -3   0 1078.59   76.69
  -5  -3   0 1143.29   80.29
   5   3   0 1163.88   77.49
   5   3   0 1161.08   80.29
   5   3   0 1247.48   79.49
   5   3   0 1084.59   78.59
   5   3   0 1191.98   77.19
   5   3   0 1240.38   85.49
   5   3   0 1065.99   77.89
  -6  -3   0   16.80    4.60
  -6  -3   0   19.10    5.30
  -6  -3   0   17.70    4.00
  -6  -3   0   17.70    6.70
  -6  -3   0   18.10    6.80
   6   3   0   20.80    5.80
   6   3   0   21.70    4.50
   6   3   0   24.00    4.60
   6   3   0   35.70    7.00
  -7  -3   0  100.99   16.10
  -7  -3   0  104.49   14.30
  -7  -3   0  107.29   11.40
  -7  -3   0  118.19   18.20
  -7  -3   0   92.29   12.50
   7   3   0  122.99   11.10
   7   3   0   97.79   13.60
   7   3   0  117.99   14.60
   7   3   0  105.49   13.50
   7   3   0  109.49   11.80
  -8  -3   0  453.15   35.10
  -8  -3   0  443.86   36.30
  -8  -3   0  419.56   39.30
  -8  -3   0  356.96   37.30
  -8  -3   0  419.76   32.40
   8   3   0  437.16   32.80
   8   3   0  455.25   33.40
   8   3   0  435.96   34.50
   8   3   0  529.65   36.70
   8   3   0  471.05   36.20
  -9  -3   0   77.29   12.40
  -9  -3   0   72.59   16.50
  -9  -3   0   66.59   12.50
  -9  -3   0   61.69    9.30
  -9  -3   0   49.70   13.80
   9   3   0   87.79   10.00
   9   3   0   79.09   12.30
   9   3   0   83.99   11.10
   9   3   0   68.19   10.70
   9   3   0   76.39   12.50
 -10  -3   0  323.57   26.30
 -10  -3   0  331.67   31.10
 -10  -3   0  331.47   29.90
 -10  -3   0  280.87   38.20
 -10  -3   0  279.47   36.80
  10   3   0  348.47   25.40
  10   3   0  329.17   27.10
  10   3   0  331.27   29.80
  10   3   0  382.26   29.80
 -11  -3   0  128.19   20.20
 -11  -3   0  135.69   19.50
 -11  -3   0   89.29   20.80
 -11  -3   0   93.99   21.60
  11   3   0  127.89   12.20
  11   3   0  121.39   17.30
 -12  -3   0   45.90   16.40
 -12  -3   0   30.50   14.30
  12   3   0   45.10   10.60
 -13  -3   0   83.79   22.50
 -13  -3   0   97.29   25.10
  13   3   0  185.08   20.50
 -14  -3   0    9.00    8.00
 -14  -3   0   -4.60   10.70
 -14  -3   0   -3.00    9.50
  14   3   0   -0.90    4.70
 -15  -3   0  207.78   39.70
 -15  -3   0  162.48   35.60
 -13   4   0   55.39   23.00
 -13   4   0   42.40   18.60
  12  -4   0    0.40    8.40
 -12   4   0    1.60   12.50
 -12   4   0    5.30   11.90
  11  -4   0  337.77   38.90
 -11   4   0  254.87   39.40
 -11   4   0  367.26   32.20
 -11   4   0  272.97   42.60
  10  -4   0    2.00    1.80
  10  -4   0    6.80    7.60
  10  -4   0   -5.90    3.60
 -10   4   0   14.00    7.00
 -10   4   0   -4.50    8.30
 -10   4   0    4.00    6.60
 -10   4   0   13.30   11.10
   9  -4   0   -3.30    4.60
   9  -4   0   -2.10    2.80
   9  -4   0    0.90    3.40
  -9   4   0   -1.40    4.50
  -9   4   0   -1.90    5.40
  -9   4   0    3.50    8.10
  -9   4   0    2.10    5.30
  -9   4   0    4.20    3.60
  -9   4   0   -8.00    7.70
   8  -4   0   44.50    7.40
   8  -4   0   26.20    6.70
   8  -4   0   35.90    7.20
  -8   4   0   27.20    8.40
  -8   4   0   28.50    9.50
  -8   4   0   41.40    6.80
  -8   4   0   32.60   12.80
  -8   4   0   28.40    9.10
  -8   4   0   48.20   11.60
  -8   4   0   25.30    7.80
  -8   4   0   20.00   11.20
   7  -4   0  201.58   16.30
   7  -4   0  179.78   16.50
   7  -4   0  153.98   15.00
  -7   4   0  169.18   21.90
  -7   4   0  174.88   15.20
  -7   4   0  128.09   22.40
  -7   4   0  190.08   21.20
  -7   4   0  164.28   19.80
  -7   4   0  142.29   24.60
  -7   4   0  183.18   22.30
  -7   4   0  177.78   21.40
   6  -4   0  243.28   19.50
   6  -4   0  271.47   17.00
   6  -4   0  260.67   20.30
   6  -4   0  216.48   18.70
   6  -4   0  293.47   23.20
   6  -4   0  232.38   20.70
  -6   4   0  250.87   22.60
  -6   4   0  250.27   19.80
  -6   4   0  218.38   21.60
  -6   4   0  242.18   22.50
  -6   4   0  144.39   24.30
  -6   4   0  213.58   29.40
  -6   4   0  223.18   23.10
  -6   4   0  240.48   23.00
  -6   4   0  252.17   19.40
   5  -4   0  561.44   41.30
   5  -4   0  543.15   41.00
   5  -4   0  669.33   41.30
   5  -4   0  620.44   40.60
   5  -4   0  599.14   39.60
   5  -4   0  588.94   40.80
   5  -4   0  596.74   44.70
   5  -4   0  594.44   39.50
   5  -4   0  599.94   42.10
   5  -4   0  530.95   42.60
   5  -4   0  629.84   43.40
  -5   4   0  434.76   46.20
  -5   4   0  593.64   45.50
  -5   4   0  577.84   41.10
  -5   4   0  578.54   41.60
  -5   4   0  602.84   43.90
  -5   4   0  528.05   43.90
  -5   4   0  622.54   45.00
  -5   4   0  592.94   43.90
   4  -4   0 1505.75   97.09
   4  -4   0 1420.56   95.49
   4  -4   0 1477.15   97.19
   4  -4   0 1383.56   95.19
   4  -4   0 1332.27   97.79
   4  -4   0 1378.86   95.69
   4  -4   0 1440.76   99.89
   4  -4   0 1430.06   96.29
   4  -4   0 1400.86   96.49
   4  -4   0 1452.15   96.29
   4  -4   0 1498.95   95.09
   4  -4   0 1564.34   98.49
  -4   4   0 1478.45   98.59
  -4   4   0 1508.65   98.59
  -4   4   0 1417.46   99.09
  -4   4   0 1417.56   96.59
  -4   4   0 1434.86  100.09
  -4   4   0 1438.66   96.09
  -4   4   0 1409.16   99.19
   3  -4   0  670.63   42.40
   3  -4   0  664.03   44.40
   3  -4   0  622.14   44.10
   3  -4   0  636.14   43.30
   3  -4   0  617.54   42.50
   3  -4   0  649.74   42.50
   3  -4   0  618.74   42.00
   3  -4   0  609.14   41.90
   3  -4   0  647.14   42.90
   3  -4   0  598.04   45.70
   3  -4   0  619.74   43.70
   3  -4   0  633.54   44.40
   3  -4   0  583.34   42.60
  -3   4   0  581.24   42.20
  -3   4   0  559.94   44.60
  -3   4   0  631.74   44.00
  -3   4   0  627.04   45.70
  -3   4   0  591.24   44.00
  -3   4   0  638.74   42.90
  -3   4   0  617.14   44.90
  -3   4   0  513.25   46.30
   2  -4   0    1.70    3.10
   2  -4   0    1.70    1.80
   2  -4   0    1.20    2.10
   2  -4   0    1.50    1.20
   2  -4   0    1.00    1.20
   2  -4   0    5.50    2.80
   2  -4   0    1.40    1.80
   2  -4   0    1.00    1.40
   2  -4   0    0.50    1.30
   2  -4   0    3.00    1.70
   2  -4   0   -0.80    1.10
   2  -4   0    0.90    1.80
   2  -4   0    2.70    2.50
   2  -4   0    1.30    1.40
  -2   4   0   -0.40    1.30
  -2   4   0    1.70    1.40
  -2   4   0    0.60    1.60
  -2   4   0    1.20    2.00
  -2   4   0    2.40    1.40
  -2   4   0   -0.80    2.20
  -2   4   0    2.00    2.10
  -2   4   0   -0.90    2.90
  -2   4   0    0.30    1.40
  -2   4   0    6.80    3.00
  -2   4   0   -1.00    2.50
   1  -4   0  739.03   50.89
   1  -4   0  761.02   50.89
   1  -4   0  749.92   50.29
   1  -4   0  742.63   49.70
   1  -4   0  825.92   52.49
   1  -4   0  765.62   51.29
   1  -4   0  743.13   51.59
   1  -4   0  741.23   50.79
   1  -4   0  718.83   49.99
   1  -4   0  686.83   51.59
   1  -4   0  818.52   52.09
   1  -4   0  688.73   50.49
  -1   4   0  699.13   51.99
  -1   4   0  742.03   50.39
  -1   4   0  787.42   51.29
  -1   4   0  663.03   51.59
  -1   4   0  766.42   52.69
  -1   4   0  758.32   50.09
  -1   4   0  782.02   51.79
  -1   4   0  764.92   51.09
  -1   4   0  714.33   51.99
  -1   4   0  777.92   52.89
  -1   4   0  745.53   50.49
   0  -4   0   58.89    6.70
   0  -4   0   60.99    7.80
   0  -4   0   79.39    8.80
   0  -4   0   63.29    6.70
   0  -4   0   63.29    7.50
   0  -4   0   62.29    8.10
   0  -4   0   69.99    6.10
   0  -4   0   64.99    7.70
   0  -4   0   69.49    6.20
   0  -4   0   64.89    7.20
   0  -4   0   70.19    5.80
   0  -4   0   72.69    8.80
   0  -4   0   64.69    6.50
   0  -4   0   77.99    7.80
   0  -4   0   75.19    7.30
   0   4   0   62.69    6.90
   0   4   0   73.79    8.10
   0   4   0   64.89    6.60
   0   4   0   79.59    8.80
   0   4   0   69.39    6.40
   0   4   0   67.49    7.80
   0   4   0   66.99    6.80
   0   4   0   72.79    6.50
   0   4   0   58.19    5.80
   0   4   0   79.59    7.20
   0   4   0   49.90    8.00
  -1  -4   0  684.13   45.10
  -1  -4   0  616.74   45.40
  -1  -4   0  730.63   45.60
  -1  -4   0  614.04   44.80
  -1  -4   0  736.33   45.80
  -1  -4   0  637.74   44.80
  -1  -4   0  603.54   45.30
  -1  -4   0  603.44   46.90
  -1  -4   0  667.03   44.50
  -1  -4   0  638.04   44.70
  -1  -4   0  679.23   46.40
  -1  -4   0  701.03   46.50
  -1  -4   0  668.63   45.70
  -1  -4   0  692.73   46.00
   1   4   0  669.33   45.10
   1   4   0  655.73   45.30
   1   4   0  690.93   46.20
   1   4   0  597.34   47.30
   1   4   0  670.23   45.00
   1   4   0  635.24   44.50
   1   4   0  651.33   45.50
   1   4   0  676.93   45.20
   1   4   0  716.43   48.20
   1   4   0  665.23   45.50
   1   4   0  646.24   46.10
   1   4   0  689.53   45.70
  -2  -4   0 1515.55   96.89
  -2  -4   0 1488.75   96.49
  -2  -4   0 1362.06   99.29
  -2  -4   0 1425.06   96.29
  -2  -4   0 1429.66   97.19
  -2  -4   0 1463.95   97.69
  -2  -4   0 1397.56   96.19
  -2  -4   0 1437.56   96.69
  -2  -4   0 1502.75   98.29
  -2  -4   0 1468.85   96.59
   2   4   0 1428.46   96.49
   2   4   0 1497.25   97.79
   2   4   0 1434.06   96.69
   2   4   0 1480.95   97.59
   2   4   0 1460.05   96.29
   2   4   0 1472.25   96.69
   2   4   0 1469.95   96.39
   2   4   0 1559.24   97.99
   2   4   0 1398.16   97.19
   2   4   0 1470.45   96.49
   2   4   0 1532.45   99.99
   2   4   0 1260.47   99.09
  -3  -4   0 1728.93  134.19
  -3  -4   0 1910.91  131.89
  -3  -4   0 1985.90  130.59
  -3  -4   0 2057.19  133.39
  -3  -4   0 2004.00  131.29
  -3  -4   0 1971.80  131.09
  -3  -4   0 1977.80  130.89
  -3  -4   0 2054.59  132.79
   3   4   0 2024.30  132.09
   3   4   0 2167.68  132.79
   3   4   0 2001.00  130.09
   3   4   0 2001.30  130.59
   3   4   0 2018.70  131.29
   3   4   0 2075.49  130.99
   3   4   0 2004.30  131.29
   3   4   0 1910.51  131.19
   3   4   0 1700.03  133.89
  -4  -4   0 1948.21  126.99
  -4  -4   0 1640.34  130.09
  -4  -4   0 1799.92  127.59
  -4  -4   0 1953.70  129.49
  -4  -4   0 2000.30  126.29
  -4  -4   0 1889.31  128.69
   4   4   0 1734.63  129.89
   4   4   0 1931.01  126.89
   4   4   0 2092.79  128.69
   4   4   0 1973.50  126.39
   4   4   0 1897.31  125.69
   4   4   0 1930.11  127.79
  -5  -4   0 2443.66  185.18
  -5  -4   0 2675.23  181.28
  -5  -4   0 2692.33  182.38
  -5  -4   0 2719.43  180.18
  -5  -4   0 2815.42  184.58
  -5  -4   0 2598.64  183.28
   5   4   0 2690.93  184.58
   5   4   0 2884.21  181.18
   5   4   0 2915.11  180.68
   5   4   0 2741.03  182.28
   5   4   0 2832.82  181.58
  -6  -4   0   39.80    7.70
  -6  -4   0   61.69   11.60
  -6  -4   0   49.40    7.90
  -6  -4   0   31.80    5.70
  -6  -4   0   66.29   11.10
  -6  -4   0   42.20   10.30
   6   4   0   51.49    8.80
   6   4   0   67.99    7.90
   6   4   0   62.19    7.90
   6   4   0   55.79    8.80
   6   4   0   57.19   10.30
   6   4   0   36.10    6.90
  -7  -4   0  694.23   53.39
  -7  -4   0  652.73   50.89
  -7  -4   0  587.64   53.99
  -7  -4   0  706.43   48.20
  -7  -4   0  630.54   53.59
  -7  -4   0  715.53   50.19
   7   4   0  717.83   50.99
   7   4   0  729.53   52.59
   7   4   0  697.83   48.70
   7   4   0  658.33   49.70
   7   4   0  711.23   50.79
   7   4   0  694.73   48.90
  -8  -4   0   29.70   10.10
  -8  -4   0   27.10    9.30
  -8  -4   0   29.10    7.80
  -8  -4   0   19.90    5.00
  -8  -4   0   14.10    8.00
  -8  -4   0   17.70    6.00
   8   4   0   27.20    6.10
   8   4   0   17.80    4.80
   8   4   0   12.90    6.00
   8   4   0   20.00    6.20
   8   4   0   23.90    6.70
   8   4   0   22.30    6.80
  -9  -4   0   73.89   13.10
  -9  -4   0   78.39   10.60
  -9  -4   0   94.79   17.50
  -9  -4   0   87.59   13.80
  -9  -4   0   70.89   16.00
  -9  -4   0   90.59   18.40
   9   4   0   89.59   14.00
   9   4   0   90.79   10.90
   9   4   0   96.49   13.50
   9   4   0   75.69   13.30
   9   4   0   95.79   11.90
 -10  -4   0  164.38   17.40
 -10  -4   0  156.18   26.60
 -10  -4   0  128.29   23.30
 -10  -4   0  199.88   24.30
 -10  -4   0  159.68   20.90
 -10  -4   0  149.19   25.70
  10   4   0  178.98   15.60
  10   4   0  154.38   20.40
  10   4   0  200.98   19.60
  10   4   0  172.18   18.40
  10   4   0  184.58   17.60
 -11  -4   0   67.29   13.50
 -11  -4   0   51.59   15.90
 -11  -4   0   67.79   14.30
 -11  -4   0   53.69   17.10
  11   4   0   58.99    8.10
  11   4   0   64.19   10.30
  11   4   0   68.79   13.30
 -12  -4   0   85.69   20.60
 -12  -4   0  112.89   24.00
  12   4   0   99.19   16.30
 -13  -4   0  -14.40    5.20
 -13  -4   0    9.80   11.50
  13   4   0    1.40    5.60
 -14  -4   0   67.89   21.70
 -14  -4   0   86.99   25.50
  14   4   0  129.99   16.60
 -15  -4   0   23.10   15.60
 -15  -4   0  -11.60   10.90
 -13   5   0   -0.50   11.60
 -13   5   0  -11.70   13.70
 -12   5   0   77.99   22.70
 -12   5   0   73.49   23.70
  11  -5   0  186.08   27.60
 -11   5   0  190.58   23.80
 -11   5   0   83.39   25.60
 -11   5   0  104.69   24.60
  10  -5   0  107.99   13.60
  10  -5   0  103.99   20.00
 -10   5   0   31.40   16.50
 -10   5   0   74.39   20.50
 -10   5   0   88.39   15.40
   9  -5   0  154.98   12.30
   9  -5   0  159.78   16.90
   9  -5   0  150.98   23.40
  -9   5   0  118.89   18.00
  -9   5   0   96.99   23.30
  -9   5   0  191.28   25.50
  -9   5   0   76.59   19.90
   8  -5   0    2.70    5.00
   8  -5   0   -2.40    4.60
   8  -5   0   -0.90    2.80
   8  -5   0    0.40    3.00
  -8   5   0    5.40    6.50
  -8   5   0    0.00    4.10
  -8   5   0   13.30    6.40
  -8   5   0    2.30    3.00
  -8   5   0    5.60    8.20
  -8   5   0   -2.80    4.70
  -8   5   0   -3.70    7.80
   7  -5   0  606.24   45.70
   7  -5   0  684.63   47.50
   7  -5   0  623.04   45.30
  -7   5   0  615.64   48.80
  -7   5   0  621.94   51.19
  -7   5   0  594.54   44.70
  -7   5   0  625.74   50.39
  -7   5   0  644.44   48.60
  -7   5   0  599.24   45.30
  -7   5   0  636.84   49.70
   6  -5   0  542.95   42.00
   6  -5   0  604.84   41.70
   6  -5   0  570.44   41.10
  -6   5   0  563.94   45.40
  -6   5   0  623.64   44.40
  -6   5   0  565.14   41.20
  -6   5   0  564.54   44.60
  -6   5   0  579.54   44.50
  -6   5   0  553.34   40.60
  -6   5   0  571.94   46.30
  -6   5   0  495.95   48.40
   5  -5   0  136.69   19.90
   5  -5   0  119.19   10.80
   5  -5   0  131.09    9.90
   5  -5   0  139.99   12.00
   5  -5   0  122.19   15.90
   5  -5   0  109.09   11.70
   5  -5   0  142.39   10.20
   5  -5   0  119.19   14.10
  -5   5   0  113.99   16.50
  -5   5   0  131.29   11.50
  -5   5   0  137.99   17.40
  -5   5   0   79.09   17.10
  -5   5   0  121.99   15.00
  -5   5   0   82.49   16.30
  -5   5   0  110.09   14.60
  -5   5   0  135.89   12.10
  -5   5   0  137.39   16.70
   4  -5   0  631.44   41.20
   4  -5   0  615.64   42.50
   4  -5   0  582.04   45.00
   4  -5   0  582.24   41.90
   4  -5   0  598.24   44.10
   4  -5   0  621.64   41.90
   4  -5   0  568.64   40.80
   4  -5   0  591.74   40.10
   4  -5   0  566.44   43.10
   4  -5   0  594.34   41.60
   4  -5   0  691.33   44.10
   4  -5   0  565.44   40.20
  -4   5   0  603.04   45.00
  -4   5   0  475.45   46.30
  -4   5   0  540.75   44.60
  -4   5   0  610.84   44.00
  -4   5   0  564.54   45.50
  -4   5   0  599.64   43.80
  -4   5   0  601.64   41.50
  -4   5   0  628.54   42.30
   3  -5   0   93.49   10.60
   3  -5   0   73.69    9.80
   3  -5   0   77.19   10.30
   3  -5   0   69.69    7.10
   3  -5   0   80.89    7.20
   3  -5   0   84.39    8.50
   3  -5   0   76.69   12.10
   3  -5   0   79.49    7.00
   3  -5   0   99.39    8.30
   3  -5   0   77.69    9.70
   3  -5   0   94.49    8.20
   3  -5   0   95.29    7.60
   3  -5   0   69.09    8.40
  -3   5   0   71.39   10.70
  -3   5   0   65.09    8.30
  -3   5   0   65.99    7.80
  -3   5   0  104.09   13.10
  -3   5   0   59.49   10.10
  -3   5   0   77.29   10.10
  -3   5   0   51.19   10.70
  -3   5   0   83.29   13.60
  -3   5   0   91.99   10.40
   2  -5   0 1247.78   84.39
   2  -5   0 1288.27   85.69
   2  -5   0 1280.57   83.99
   2  -5   0 1315.67   84.09
   2  -5   0 1223.58   85.49
   2  -5   0 1256.77   83.19
   2  -5   0 1407.36   86.09
   2  -5   0 1250.07   84.69
   2  -5   0 1211.88   83.39
   2  -5   0 1323.27   84.79
   2  -5   0 1313.17   84.49
  -2   5   0 1224.78   83.69
  -2   5   0 1139.19   86.09
  -2   5   0 1303.77   85.39
  -2   5   0 1052.29   86.29
  -2   5   0 1247.38   83.99
  -2   5   0 1274.97   85.29
  -2   5   0 1227.38   87.29
  -2   5   0 1268.07   84.39
  -2   5   0 1266.37   87.89
  -2   5   0 1197.18   86.29
   1  -5   0 1126.89   78.89
   1  -5   0 1179.78   81.39
   1  -5   0 1124.89   78.69
   1  -5   0 1172.88   79.79
   1  -5   0 1182.68   79.59
   1  -5   0 1245.28   79.89
   1  -5   0 1158.78   80.09
   1  -5   0 1198.38   79.69
   1  -5   0 1340.87   81.39
   1  -5   0 1151.78   80.59
   1  -5   0 1230.68   78.39
   1  -5   0 1093.09   80.49
  -1   5   0 1159.28   78.79
  -1   5   0 1212.08   81.39
  -1   5   0 1186.38   79.39
  -1   5   0 1165.38   80.19
  -1   5   0 1208.88   79.49
  -1   5   0 1208.58   81.59
  -1   5   0 1099.49   80.89
  -1   5   0 1175.48   79.79
  -1   5   0 1126.29   82.09
  -1   5   0 1222.48   81.29
  -1   5   0 1241.18   80.99
   0  -5   0    2.30    1.90
   0  -5   0    4.70    1.80
   0  -5   0    1.70    2.20
   0  -5   0    6.20    2.80
   0  -5   0   11.50    4.00
   0  -5   0    4.50    2.80
   0  -5   0    3.90    1.90
   0  -5   0    8.30    3.30
   0  -5   0    5.20    2.60
   0  -5   0    7.20    2.30
   0  -5   0    8.30    3.10
   0  -5   0    3.60    2.20
   0  -5   0    8.30    3.50
   0  -5   0    7.50    1.90
   0  -5   0    6.00    2.40
   0   5   0    7.10    2.30
   0   5   0    3.10    2.20
   0   5   0    5.30    2.90
   0   5   0    4.50    2.00
   0   5   0    5.80    3.20
   0   5   0    3.90    2.00
   0   5   0    5.20    2.10
   0   5   0    4.80    2.70
   0   5   0    6.70    1.90
   0   5   0    3.70    2.50
   0   5   0    8.20    2.90
  -1  -5   0  782.92   58.09
  -1  -5   0  812.22   57.29
  -1  -5   0  843.52   58.99
  -1  -5   0  834.82   59.89
  -1  -5   0  828.02   57.29
  -1  -5   0  835.32   58.09
  -1  -5   0  862.41   59.19
  -1  -5   0  927.41   57.99
  -1  -5   0  878.41   58.29
  -1  -5   0  784.82   58.09
  -1  -5   0  848.12   57.19
  -1  -5   0  922.61   58.39
  -1  -5   0  850.01   56.79
  -1  -5   0  867.01   58.49
   1   5   0  845.52   56.89
   1   5   0  781.62   58.69
   1   5   0  841.52   57.99
   1   5   0  837.02   58.19
   1   5   0  835.22   58.09
   1   5   0  935.41   57.89
   1   5   0  789.72   57.29
   1   5   0  838.82   60.79
   1   5   0  868.71   58.89
   1   5   0  882.51   57.69
  -2  -5   0   13.70    3.20
  -2  -5   0   16.60    3.20
  -2  -5   0   18.50    3.00
  -2  -5   0   18.00    3.70
  -2  -5   0   10.70    4.50
  -2  -5   0   17.40    3.80
  -2  -5   0   18.80    4.80
  -2  -5   0   11.60    2.90
  -2  -5   0   18.00    4.00
  -2  -5   0   18.00    3.40
  -2  -5   0   16.30    4.20
   2   5   0   13.70    3.30
   2   5   0   19.30    4.00
   2   5   0   12.00    3.10
   2   5   0   18.50    3.80
   2   5   0   18.70    3.60
   2   5   0   12.50    3.80
   2   5   0   17.40    1.90
   2   5   0   11.50    3.30
   2   5   0   14.30    3.20
   2   5   0   19.10    4.60
   2   5   0   11.50    4.90
   2   5   0   16.20    3.50
  -3  -5   0 1451.35  101.39
  -3  -5   0 1536.45  103.09
  -3  -5   0 1554.14  101.29
  -3  -5   0 1498.25  100.69
  -3  -5   0 1511.65  101.49
  -3  -5   0 1396.66  105.09
  -3  -5   0 1492.55  103.59
  -3  -5   0 1533.65  100.89
   3   5   0 1546.65  101.09
   3   5   0 1479.45  101.49
   3   5   0 1578.54  102.59
   3   5   0 1507.65  102.69
   3   5   0 1656.23  103.39
   3   5   0 1534.95  101.59
   3   5   0 1503.65  100.59
   3   5   0 1553.34  101.59
   3   5   0 1570.84  101.29
   3   5   0 1330.57  104.79
  -4  -5   0  516.95   36.60
  -4  -5   0  555.64   37.20
  -4  -5   0  519.95   37.40
  -4  -5   0  552.94   40.20
  -4  -5   0  514.95   41.80
  -4  -5   0  506.75   39.10
  -4  -5   0  511.05   38.30
   4   5   0  538.55   38.50
   4   5   0  551.14   36.50
   4   5   0  465.45   40.80
   4   5   0  539.05   37.50
   4   5   0  529.45   37.00
   4   5   0  500.45   37.30
   4   5   0  506.25   37.30
   4   5   0  520.75   35.80
  -5  -5   0  231.78   24.30
  -5  -5   0  255.27   19.50
  -5  -5   0  235.08   20.90
  -5  -5   0  246.28   20.10
  -5  -5   0  240.68   19.10
  -5  -5   0  237.98   22.70
  -5  -5   0  259.07   22.50
   5   5   0  280.27   20.00
   5   5   0  248.58   18.40
   5   5   0  218.88   23.00
   5   5   0  243.08   20.00
   5   5   0  270.17   21.40
   5   5   0  266.87   18.80
  -6  -5   0  706.03   54.79
  -6  -5   0  607.84   55.49
  -6  -5   0  687.43   53.79
  -6  -5   0  754.12   51.59
  -6  -5   0  701.93   52.49
  -6  -5   0  733.33   50.19
   6   5   0  759.12   52.79
   6   5   0  738.23   50.59
   6   5   0  694.13   54.79
   6   5   0  702.83   51.29
   6   5   0  774.62   51.19
  -7  -5   0    5.20    3.70
  -7  -5   0    4.00    5.10
  -7  -5   0   11.30    7.00
  -7  -5   0    6.90    4.00
  -7  -5   0   13.30    7.30
  -7  -5   0   -0.80    0.90
   7   5   0    2.80    2.90
   7   5   0    0.60    3.10
   7   5   0    1.90    3.20
   7   5   0    6.10    3.70
   7   5   0    4.10    3.30
   7   5   0    3.10    4.50
  -8  -5   0   91.19   13.90
  -8  -5   0   93.19   13.20
  -8  -5   0  112.69   18.60
  -8  -5   0   72.19   16.20
  -8  -5   0   95.79   16.70
   8   5   0  110.69   12.50
   8   5   0  123.09   17.20
   8   5   0   97.29   13.90
   8   5   0  108.59   12.40
   8   5   0   69.09   11.50
   8   5   0   94.09   13.60
  -9  -5   0   33.80    9.30
  -9  -5   0   35.40    8.50
  -9  -5   0   51.09   13.70
  -9  -5   0   50.49   13.90
  -9  -5   0   49.30   14.30
   9   5   0   82.39   12.60
   9   5   0   62.69   12.30
   9   5   0   42.20    8.30
   9   5   0   65.99    9.20
   9   5   0   49.60   10.70
 -10  -5   0   65.19   12.80
 -10  -5   0   26.00   11.50
 -10  -5   0   45.80   10.10
 -10  -5   0   26.80   11.60
 -10  -5   0   13.20   10.60
  10   5   0   40.60   10.10
  10   5   0   57.29   11.80
  10   5   0   51.09   10.00
  10   5   0   49.20    7.90
  10   5   0   44.80    9.00
 -11  -5   0  534.15   45.00
 -11  -5   0  509.65   43.10
 -11  -5   0  454.05   48.50
 -11  -5   0  410.46   46.30
  11   5   0  498.95   43.00
  11   5   0  608.44   39.00
  11   5   0  542.75   40.90
 -12  -5   0   43.40   16.50
 -12  -5   0   73.59   20.10
  12   5   0  105.49   16.50
  12   5   0   89.59   12.10
 -13  -5   0   92.79   23.20
 -13  -5   0  107.39   26.40
  13   5   0  133.89   19.00
 -14  -5   0  123.09   29.20
 -14  -5   0  161.28   31.70
  14   5   0  165.98   21.20
 -15  -5   0   18.90   16.80
 -15  -5   0   46.70   19.00
  15   5   0   69.09   17.50
 -12   6   0   42.50   20.20
 -12   6   0    1.50   13.70
 -11   6   0   36.00   18.10
 -11   6   0   40.70   16.20
  10  -6   0  115.49   22.50
 -10   6   0  145.39   20.70
 -10   6   0  102.69   25.00
 -10   6   0  101.79   23.00
   9  -6   0   18.10    9.60
   9  -6   0   17.00    5.60
  -9   6   0    2.10    6.00
  -9   6   0    8.50    9.70
  -9   6   0   -0.90   10.20
  -9   6   0   24.80   11.30
  -9   6   0    9.90    7.10
   8  -6   0  307.97   34.30
   8  -6   0  289.67   23.20
   8  -6   0  275.67   21.00
  -8   6   0  245.68   28.90
  -8   6   0  334.77   31.50
  -8   6   0  211.98   33.90
  -8   6   0  235.58   27.30
  -8   6   0  286.67   28.80
  -8   6   0  175.98   30.80
  -8   6   0  260.07   22.40
   7  -6   0  969.50   66.69
   7  -6   0 1074.49   67.49
   7  -6   0 1085.49   68.29
   7  -6   0 1011.00   74.19
  -7   6   0  723.73   72.29
  -7   6   0  695.03   73.29
  -7   6   0 1050.09   74.89
  -7   6   0  968.00   70.09
  -7   6   0  957.00   66.49
  -7   6   0  903.91   72.39
  -7   6   0  948.61   66.99
  -7   6   0  822.72   69.99
  -7   6   0 1070.39   72.49
   6  -6   0   13.20    5.60
   6  -6   0   13.10    5.10
   6  -6   0   16.10    7.40
   6  -6   0   16.00    4.70
  -6   6   0   17.90   10.20
  -6   6   0   19.70    8.50
  -6   6   0   22.60    7.10
  -6   6   0   11.00    4.20
  -6   6   0   11.90    8.70
  -6   6   0   14.10    6.70
  -6   6   0    1.50    5.10
  -6   6   0   18.80    4.80
  -6   6   0   23.90    7.50
   5  -6   0  543.95   39.90
   5  -6   0  545.55   38.90
   5  -6   0  569.44   39.30
   5  -6   0  486.65   37.30
  -5   6   0  532.75   43.00
  -5   6   0  566.04   44.40
  -5   6   0  565.14   41.30
  -5   6   0  569.64   41.70
  -5   6   0  553.14   42.60
  -5   6   0  483.75   45.50
  -5   6   0  400.06   42.70
  -5   6   0  556.84   39.20
  -5   6   0  552.24   38.50
   4  -6   0  376.66   25.70
   4  -6   0  283.47   22.00
   4  -6   0  298.27   20.70
   4  -6   0  300.47   20.80
   4  -6   0  335.27   22.60
   4  -6   0  276.47   25.10
   4  -6   0  302.27   23.40
   4  -6   0  285.57   26.10
   4  -6   0  282.87   24.20
   4  -6   0  288.27   23.60
   4  -6   0  323.17   22.00
  -4   6   0  290.77   25.00
  -4   6   0  262.67   28.30
  -4   6   0  316.17   25.30
  -4   6   0  289.07   26.70
  -4   6   0  349.77   27.20
  -4   6   0  286.87   23.40
  -4   6   0  244.88   27.00
  -4   6   0  299.67   27.50
  -4   6   0  309.07   23.00
   3  -6   0  222.08   17.80
   3  -6   0  203.98   14.10
   3  -6   0  200.08   17.30
   3  -6   0  209.58   19.40
   3  -6   0  199.88   15.60
   3  -6   0  204.78   14.60
   3  -6   0  157.08   20.20
   3  -6   0  203.08   14.30
   3  -6   0  207.38   15.80
   3  -6   0  198.08   16.10
   3  -6   0  190.38   16.40
   3  -6   0  202.78   16.60
   3  -6   0  180.18   17.60
   3  -6   0  191.68   14.70
   3  -6   0  167.08   14.60
  -3   6   0  189.28   16.10
  -3   6   0  192.68   19.60
  -3   6   0  168.88   20.20
  -3   6   0  206.48   17.50
  -3   6   0  204.18   17.50
  -3   6   0  204.08   18.80
  -3   6   0  185.08   22.90
  -3   6   0  168.38   19.10
  -3   6   0  179.08   15.40
   2  -6   0  458.85   31.40
   2  -6   0  413.06   31.50
   2  -6   0  479.05   31.70
   2  -6   0  496.25   31.00
   2  -6   0  415.86   30.00
   2  -6   0  478.75   31.50
   2  -6   0  488.05   33.10
   2  -6   0  327.07   31.50
   2  -6   0  455.45   34.30
   2  -6   0  410.26   32.50
   2  -6   0  331.97   33.20
   2  -6   0  413.76   32.40
   2  -6   0  430.46   30.80
   2  -6   0  441.86   30.00
  -2   6   0  464.55   32.40
  -2   6   0  441.56   31.00
  -2   6   0  440.56   32.40
  -2   6   0  429.56   34.80
  -2   6   0  420.26   34.50
  -2   6   0  425.96   34.00
  -2   6   0  430.06   33.70
  -2   6   0  419.36   30.60
  -2   6   0  442.86   31.40
  -2   6   0  395.56   33.10
   1  -6   0   88.19   13.20
   1  -6   0   90.49   12.30
   1  -6   0  107.79   11.90
   1  -6   0  114.39   13.40
   1  -6   0  118.79    9.60
   1  -6   0  121.09    9.10
   1  -6   0  127.39   11.80
   1  -6   0  111.39   11.40
   1  -6   0  112.79   10.50
   1  -6   0  114.99   10.50
   1  -6   0  111.79   10.30
   1  -6   0   98.49    9.50
   1  -6   0  109.29   11.20
   1  -6   0  114.59   10.40
  -1   6   0  127.39   12.50
  -1   6   0   91.29   12.50
  -1   6   0  126.79   12.10
  -1   6   0  112.29    9.60
  -1   6   0  104.99   13.10
  -1   6   0  113.09   14.40
  -1   6   0  110.09   10.00
  -1   6   0  107.49   10.40
  -1   6   0  104.89   10.70
  -1   6   0  108.69   10.20
   0  -6   0  198.78   16.40
   0  -6   0  198.18   16.60
   0  -6   0  208.48   16.80
   0  -6   0  198.28   17.40
   0  -6   0  207.38   17.50
   0  -6   0  191.58   17.70
   0  -6   0  229.18   18.40
   0  -6   0  219.48   15.90
   0  -6   0  198.38   16.70
   0  -6   0  195.28   16.80
   0  -6   0  194.58   17.80
   0  -6   0  236.88   15.50
   0  -6   0  169.88   16.90
   0  -6   0  219.48   16.00
   0   6   0  214.28   17.10
   0   6   0  214.08   15.70
   0   6   0  229.38   16.70
   0   6   0  213.48   17.70
   0   6   0  194.68   16.10
   0   6   0  201.38   17.20
   0   6   0  206.58   17.00
   0   6   0  216.48   19.60
   0   6   0  212.98   16.30
   0   6   0  168.98   17.30
  -1  -6   0   42.50    6.00
  -1  -6   0   63.29    8.30
  -1  -6   0   58.59    6.80
  -1  -6   0   58.29    6.10
  -1  -6   0   66.29    9.70
  -1  -6   0   63.89    8.00
  -1  -6   0   56.09    6.50
  -1  -6   0   56.89    7.70
  -1  -6   0   48.60    7.10
  -1  -6   0   72.29    8.70
  -1  -6   0   50.89    7.40
  -1  -6   0   43.30    7.50
  -1  -6   0   58.29    7.80
   1   6   0   45.80    7.70
   1   6   0   66.89    7.40
   1   6   0   63.39    7.50
   1   6   0   44.20    5.80
   1   6   0   64.49    7.70
   1   6   0   54.59    7.40
   1   6   0   51.69    7.60
   1   6   0   52.39    7.20
   1   6   0   65.49   10.80
  -2  -6   0  613.94   43.50
  -2  -6   0  625.74   45.20
  -2  -6   0  604.54   44.20
  -2  -6   0  696.03   46.10
  -2  -6   0  620.04   47.70
  -2  -6   0  678.53   44.50
  -2  -6   0  624.74   46.30
  -2  -6   0  596.84   45.40
  -2  -6   0  627.14   44.70
  -2  -6   0  615.44   43.90
   2   6   0  560.34   47.90
   2   6   0  686.03   45.10
   2   6   0  695.43   44.60
   2   6   0  666.03   44.80
   2   6   0  601.74   45.30
   2   6   0  652.23   44.50
   2   6   0  623.44   44.70
   2   6   0  638.94   46.00
   2   6   0  663.93   45.50
  -3  -6   0  415.56   35.90
  -3  -6   0  436.66   31.60
  -3  -6   0  443.66   32.10
  -3  -6   0  451.15   34.40
  -3  -6   0  465.75   33.90
  -3  -6   0  440.26   31.50
  -3  -6   0  425.26   31.10
  -3  -6   0  440.96   32.40
   3   6   0  428.56   36.40
   3   6   0  427.36   33.20
   3   6   0  478.75   32.50
   3   6   0  479.75   32.10
   3   6   0  424.06   33.00
   3   6   0  435.36   32.20
   3   6   0  412.66   33.30
   3   6   0  439.46   31.50
   3   6   0  466.85   32.00
   3   6   0  451.55   32.20
  -4  -6   0   56.89    7.90
  -4  -6   0   72.29    7.90
  -4  -6   0   56.29    8.60
  -4  -6   0   62.79   11.80
  -4  -6   0   73.79   11.20
  -4  -6   0   47.80    7.50
  -4  -6   0   69.59   10.40
   4   6   0   56.59    7.90
   4   6   0   59.79    8.90
   4   6   0   60.29    6.70
   4   6   0   61.29    7.80
   4   6   0   66.89    9.50
   4   6   0   55.99    8.00
   4   6   0   74.89    9.00
   4   6   0   57.79    7.20
   4   6   0   57.69   11.30
  -5  -6   0  882.71   62.09
  -5  -6   0  877.31   63.19
  -5  -6   0  787.22   65.69
  -5  -6   0  827.82   59.59
  -5  -6   0  872.51   60.79
  -5  -6   0  848.62   63.79
  -5  -6   0  861.51   60.29
   5   6   0  871.21   60.79
   5   6   0  809.72   65.19
   5   6   0  889.01   60.89
   5   6   0  909.91   62.29
   5   6   0  912.31   60.39
   5   6   0  904.11   59.39
   5   6   0  872.91   58.69
  -6  -6   0    5.70    3.00
  -6  -6   0    1.80    2.50
  -6  -6   0    4.20    3.10
  -6  -6   0    4.80    3.20
  -6  -6   0    5.00    4.80
  -6  -6   0    1.10    4.60
  -6  -6   0    4.00    4.60
   6   6   0   -1.20    1.50
   6   6   0    2.30    4.40
   6   6   0    2.50    3.10
   6   6   0    4.30    3.20
   6   6   0    2.90    1.90
   6   6   0   -0.50    1.50
   6   6   0    4.00    2.90
  -7  -6   0  456.25   44.80
  -7  -6   0  542.05   44.00
  -7  -6   0  581.64   40.20
  -7  -6   0  531.95   38.00
  -7  -6   0  532.05   41.10
  -7  -6   0  473.95   42.20
   7   6   0  558.94   39.00
   7   6   0  574.14   41.40
   7   6   0  479.55   42.90
   7   6   0  547.85   39.20
   7   6   0  475.05   39.20
  -8  -6   0  452.05   36.70
  -8  -6   0  447.86   33.20
  -8  -6   0  355.56   37.30
  -8  -6   0  375.56   40.60
  -8  -6   0  450.05   35.30
  -8  -6   0  408.66   39.20
   8   6   0  482.65   36.80
   8   6   0  465.85   36.50
   8   6   0  481.95   34.50
   8   6   0  509.75   39.70
   8   6   0  417.36   34.80
   8   6   0  465.55   34.20
  -9  -6   0   17.70    6.40
  -9  -6   0    8.60    5.60
  -9  -6   0   32.00   11.10
  -9  -6   0   16.60    9.80
  -9  -6   0   12.60    8.10
  -9  -6   0   13.60    4.60
   9   6   0   15.50    6.10
   9   6   0   15.60    5.00
   9   6   0   22.30    7.40
   9   6   0   10.50    6.90
   9   6   0   21.90    6.20
   9   6   0   16.00    6.50
 -10  -6   0  166.68   22.50
 -10  -6   0  155.58   24.60
 -10  -6   0  177.88   21.10
 -10  -6   0  140.39   26.60
 -10  -6   0  145.19   25.50
 -10  -6   0  184.48   18.00
  10   6   0  163.18   20.50
  10   6   0  186.88   23.20
  10   6   0  189.98   16.90
  10   6   0  175.08   22.10
  10   6   0  153.68   18.10
 -11  -6   0   87.29   16.10
 -11  -6   0   55.89   15.70
 -11  -6   0   61.49   12.10
 -11  -6   0   27.90   13.20
  11   6   0   57.79    8.90
  11   6   0   37.70   10.60
  11   6   0   46.90   10.30
 -12  -6   0  306.87   41.30
 -12  -6   0  267.07   40.50
 -12  -6   0  356.46   32.20
  12   6   0  332.17   31.60
  12   6   0  334.17   28.30
 -13  -6   0  321.27   44.80
 -13  -6   0  347.07   48.40
  13   6   0  399.86   35.20
 -14  -6   0   -0.80   11.20
 -14  -6   0    6.30   11.30
  14   6   0   -4.40    5.70
 -15  -6   0   43.60   19.50
 -15  -6   0   74.49   24.30
  15   6   0  122.69   17.00
 -12   7   0   13.30   16.00
 -12   7   0   15.00   14.60
 -11   7   0  131.19   27.80
 -11   7   0   94.19   26.80
 -10   7   0  147.49   21.70
 -10   7   0  144.69   29.40
 -10   7   0  118.99   25.40
   9  -7   0   91.69   13.10
   9  -7   0   79.29   18.50
  -9   7   0   87.19   16.80
  -9   7   0   89.99   22.10
  -9   7   0   48.60   18.20
  -9   7   0  125.59   18.30
   8  -7   0  283.97   33.40
   8  -7   0  238.58   21.90
  -8   7   0  303.97   35.60
  -8   7   0  258.87   29.80
  -8   7   0  202.38   31.60
  -8   7   0  275.97   37.70
  -8   7   0  225.98   21.90
  -8   7   0  268.27   28.40
   7  -7   0    9.80    3.90
   7  -7   0    7.70    4.50
   7  -7   0    2.70    3.70
   7  -7   0    8.60    7.10
  -7   7   0   12.90    8.60
  -7   7   0    0.70    4.70
  -7   7   0    6.90    4.30
  -7   7   0    6.20    6.50
  -7   7   0    2.10    5.30
  -7   7   0    8.80    9.60
  -7   7   0    7.60    6.50
  -7   7   0    6.60    4.20
   6  -7   0  855.91   67.69
   6  -7   0  863.81   61.59
   6  -7   0  947.31   63.29
   6  -7   0  918.31   61.79
  -6   7   0  900.71   65.49
  -6   7   0  873.91   61.19
  -6   7   0  886.21   68.69
  -6   7   0  971.20   65.19
  -6   7   0  789.62   66.39
  -6   7   0  770.52   69.09
  -6   7   0  874.71   66.09
  -6   7   0  704.23   66.99
  -6   7   0  873.81   61.79
   5  -7   0   51.49    8.80
   5  -7   0   55.89    8.50
   5  -7   0   56.99   11.90
   5  -7   0   56.89    8.50
  -5   7   0   43.10    7.40
  -5   7   0   47.60   11.70
  -5   7   0   60.79   11.00
  -5   7   0   57.59   10.00
  -5   7   0   56.19   12.80
  -5   7   0   57.59    8.70
  -5   7   0   45.10   10.30
  -5   7   0   81.69   16.90
  -5   7   0   45.10   12.10
   4  -7   0  135.59   18.40
   4  -7   0  130.29   13.40
   4  -7   0  105.19   15.80
   4  -7   0  117.59   12.40
   4  -7   0  136.79   11.30
   4  -7   0  140.09    9.90
   4  -7   0  112.79   13.20
   4  -7   0  142.99   16.90
  -4   7   0  114.19   16.70
  -4   7   0  124.39   17.60
  -4   7   0  111.39   18.00
  -4   7   0  154.28   14.90
  -4   7   0  124.39   18.30
  -4   7   0  121.29   13.70
  -4   7   0  130.99   12.20
  -4   7   0  133.29   15.50
  -4   7   0  144.49   20.70
   3  -7   0  775.02   52.39
   3  -7   0  878.41   53.89
   3  -7   0  754.32   54.99
   3  -7   0  814.62   58.99
   3  -7   0  867.41   56.59
   3  -7   0  677.63   57.39
   3  -7   0  762.32   54.39
   3  -7   0  768.62   56.79
   3  -7   0  785.52   55.09
   3  -7   0  832.22   52.69
   3  -7   0  776.92   53.09
   3  -7   0  771.52   55.89
   3  -7   0  743.73   54.79
  -3   7   0  845.12   56.39
  -3   7   0  751.12   58.19
  -3   7   0  749.92   54.69
  -3   7   0  717.93   58.29
  -3   7   0  798.62   54.19
  -3   7   0  765.12   59.49
  -3   7   0  765.72   56.19
  -3   7   0  765.72   59.49
  -3   7   0  727.23   57.59
   2  -7   0  185.28   17.50
   2  -7   0  188.38   17.50
   2  -7   0  223.18   15.90
   2  -7   0  151.08   16.70
   2  -7   0  202.98   16.30
   2  -7   0  193.48   15.00
   2  -7   0  207.28   15.10
   2  -7   0  223.58   16.30
   2  -7   0  185.28   16.60
   2  -7   0  187.38   20.90
   2  -7   0  197.98   15.90
   2  -7   0  194.68   16.70
   2  -7   0  208.68   15.20
   2  -7   0  228.78   18.30
   2  -7   0  171.98   21.20
  -2   7   0  176.28   16.70
  -2   7   0  206.18   21.70
  -2   7   0  221.88   20.30
  -2   7   0  204.78   17.70
  -2   7   0  196.48   20.30
  -2   7   0  187.98   16.00
  -2   7   0  205.78   16.10
  -2   7   0  188.48   19.00
  -2   7   0  178.18   20.60
  -2   7   0  205.38   16.70
   1  -7   0    6.60    3.90
   1  -7   0   10.00    4.00
   1  -7   0   18.50    3.20
   1  -7   0   10.80    3.30
   1  -7   0   20.60    4.70
   1  -7   0   15.50    4.60
   1  -7   0   16.40    5.30
   1  -7   0   13.90    4.00
   1  -7   0   15.70    4.10
   1  -7   0   14.10    4.90
   1  -7   0   15.90    4.40
   1  -7   0    2.60    4.40
   1  -7   0    7.60    3.30
   1  -7   0   17.40    3.30
  -1   7   0   11.30    3.40
  -1   7   0   15.00    3.90
  -1   7   0   21.70    6.50
  -1   7   0   20.30    6.00
  -1   7   0   21.40    6.20
  -1   7   0   13.30    4.10
  -1   7   0   16.10    5.30
  -1   7   0   12.90    3.80
  -1   7   0   10.00    4.60
  -1   7   0    8.80    2.90
   0  -7   0 1322.57   90.59
   0  -7   0 1276.77   89.29
   0  -7   0 1203.38   90.69
   0  -7   0 1334.77   89.49
   0  -7   0 1402.76   91.39
   0  -7   0 1206.48   89.09
   0  -7   0 1277.87   89.39
   0  -7   0 1235.18   87.99
   0  -7   0 1214.88   90.29
   0  -7   0 1302.37   89.19
   0  -7   0 1270.27   90.59
   0  -7   0 1276.87   87.99
   0  -7   0 1339.07   87.49
   0   7   0 1322.17   88.99
   0   7   0 1345.57   88.19
   0   7   0 1345.27   91.29
   0   7   0 1361.06   93.59
   0   7   0 1367.66   88.89
   0   7   0 1417.86   89.39
   0   7   0 1400.36   89.89
   0   7   0 1303.67   89.89
   0   7   0 1334.87   90.69
   0   7   0 1380.16   90.39
  -1  -7   0  517.75   40.00
  -1  -7   0  623.84   41.70
  -1  -7   0  518.05   38.60
  -1  -7   0  577.34   40.70
  -1  -7   0  554.94   41.10
  -1  -7   0  576.54   38.20
  -1  -7   0  523.55   40.30
  -1  -7   0  519.45   39.90
  -1  -7   0  566.54   40.30
  -1  -7   0  556.94   40.00
  -1  -7   0  542.05   38.60
  -1  -7   0  512.45   41.60
  -1  -7   0  556.94   40.00
  -1  -7   0  558.94   39.20
   1   7   0  531.25   39.30
   1   7   0  568.34   39.90
   1   7   0  574.14   38.50
   1   7   0  561.14   40.40
   1   7   0  564.74   40.00
   1   7   0  484.35   42.90
   1   7   0  562.34   39.30
   1   7   0  536.45   41.00
  -2  -7   0 2278.17  146.09
  -2  -7   0 2252.57  149.49
  -2  -7   0 2135.09  148.29
  -2  -7   0 2248.77  147.99
  -2  -7   0 2299.57  151.18
  -2  -7   0 2227.38  147.69
  -2  -7   0 2127.59  146.69
  -2  -7   0 2263.07  146.59
  -2  -7   0 2096.99  148.29
  -2  -7   0 2170.68  146.69
  -2  -7   0 2202.08  147.99
   2   7   0 2228.58  147.69
   2   7   0 2225.88  148.19
   2   7   0 2160.38  147.49
   2   7   0 2229.38  149.19
   2   7   0 2116.59  146.99
   2   7   0 2210.98  148.39
   2   7   0 2384.66  147.69
   2   7   0 2055.49  151.78
   2   7   0 2308.97  147.19
  -3  -7   0   98.29   14.40
  -3  -7   0   84.79   10.00
  -3  -7   0   80.69    9.20
  -3  -7   0   78.49    9.50
  -3  -7   0  103.79   12.50
  -3  -7   0   96.39    8.40
  -3  -7   0  103.39   13.40
   3   7   0   87.09   10.60
   3   7   0   87.89    9.20
   3   7   0   79.69    9.80
   3   7   0   94.69   11.70
   3   7   0   81.99   10.90
   3   7   0   79.89   11.50
   3   7   0   87.09   10.20
   3   7   0   88.59   14.40
   3   7   0   83.79    9.70
   3   7   0   88.99    6.30
   3   7   0   96.69   10.80
  -4  -7   0  473.75   34.30
  -4  -7   0  429.46   38.50
  -4  -7   0  443.56   33.70
  -4  -7   0  444.16   32.90
  -4  -7   0  473.15   35.10
  -4  -7   0  489.25   37.00
  -4  -7   0  475.65   36.00
  -4  -7   0  464.65   33.10
   4   7   0  426.26   34.80
   4   7   0  480.85   33.40
   4   7   0  463.85   34.00
   4   7   0  387.46   38.00
   4   7   0  505.45   33.90
   4   7   0  441.56   33.90
   4   7   0  455.75   32.70
   4   7   0  464.85   35.40
   4   7   0  479.45   35.80
   4   7   0  448.66   33.90
  -5  -7   0    4.10    2.80
  -5  -7   0   10.50    6.00
  -5  -7   0   -3.80    2.20
  -5  -7   0    1.60    2.50
  -5  -7   0    2.90    2.90
  -5  -7   0   -0.20    3.60
  -5  -7   0   -0.10    2.30
   5   7   0    2.10    2.10
   5   7   0    4.10    2.80
   5   7   0    5.30    3.20
   5   7   0    3.10    3.50
   5   7   0    2.60    2.90
   5   7   0   -0.60    3.60
   5   7   0    1.00    1.60
   5   7   0    1.20    2.40
   5   7   0    2.80    2.50
  -6  -7   0  493.95   43.40
  -6  -7   0  544.55   40.00
  -6  -7   0  458.95   46.30
  -6  -7   0  557.24   40.90
  -6  -7   0  560.84   41.40
  -6  -7   0  556.94   37.00
  -6  -7   0  568.54   42.90
  -6  -7   0  571.14   45.20
   6   7   0  542.05   41.10
   6   7   0  617.74   41.20
   6   7   0  570.94   43.60
   6   7   0  565.74   38.70
   6   7   0  608.74   43.30
   6   7   0  529.95   41.10
   6   7   0  525.65   46.30
   6   7   0  618.84   39.90
  -7  -7   0  406.66   33.50
  -7  -7   0  424.56   36.40
  -7  -7   0  421.56   31.30
  -7  -7   0  380.36   31.70
  -7  -7   0  376.76   30.20
  -7  -7   0  389.46   35.00
  -7  -7   0  372.26   38.10
   7   7   0  460.55   32.20
   7   7   0  332.17   35.10
   7   7   0  416.16   31.40
   7   7   0  432.76   33.80
   7   7   0  396.36   28.80
   7   7   0  434.06   32.40
  -8  -7   0   22.90   10.10
  -8  -7   0    9.90    5.10
  -8  -7   0   10.00    7.60
  -8  -7   0    5.50    3.90
  -8  -7   0    7.40    4.00
  -8  -7   0    3.50    6.00
   8   7   0    8.40    3.90
   8   7   0   12.50    3.40
   8   7   0    5.70    6.10
   8   7   0   12.20    4.90
   8   7   0   10.10    4.90
   8   7   0   10.50    5.60
  -9  -7   0   58.49   15.90
  -9  -7   0   89.99   18.30
  -9  -7   0  102.19   12.20
  -9  -7   0   85.89   13.30
  -9  -7   0  120.89   16.80
  -9  -7   0   80.39   17.00
   9   7   0  107.49   13.50
   9   7   0   84.09   11.90
   9   7   0   91.49   13.70
   9   7   0   98.89   15.50
   9   7   0   88.69   14.80
   9   7   0  111.29   18.50
 -10  -7   0  441.76   36.40
 -10  -7   0  492.95   39.80
 -10  -7   0  446.56   52.89
 -10  -7   0  433.66   43.60
 -10  -7   0  583.44   43.10
 -10  -7   0  418.66   44.20
  10   7   0  468.55   38.00
  10   7   0  569.74   38.40
  10   7   0  408.06   38.20
  10   7   0  523.85   43.20
  10   7   0  540.85   40.90
 -11  -7   0   32.70    9.40
 -11  -7   0   26.80   12.90
 -11  -7   0   40.20   14.00
 -11  -7   0   18.80    8.30
  11   7   0   30.80    8.90
  11   7   0   23.40    6.60
  11   7   0   23.00    9.00
 -12  -7   0  320.57   34.70
 -12  -7   0  258.47   38.70
 -12  -7   0  293.17   42.60
  12   7   0  352.06   32.60
  12   7   0  347.27   29.50
 -13  -7   0   -1.20    8.70
 -13  -7   0   -2.20    9.90
  13   7   0    6.70    6.40
 -14  -7   0  155.48   31.70
 -14  -7   0  103.29   26.10
  14   7   0  171.28   23.20
 -15  -7   0   31.60   17.50
 -15  -7   0   37.00   17.40
  15   7   0   53.49   12.90
 -11   8   0   86.09   25.20
 -11   8   0   93.09   24.50
 -10   8   0   -7.90    8.60
 -10   8   0   -4.70   11.50
   9  -8   0  127.59   23.50
  -9   8   0   88.19   22.10
  -9   8   0  136.69   27.80
  -9   8   0  123.09   21.10
  -9   8   0  103.69   17.90
   8  -8   0   41.00    8.50
   8  -8   0   30.70   12.20
  -8   8   0   27.30   10.00
  -8   8   0   36.70    8.20
  -8   8   0   29.40   13.60
  -8   8   0   45.20   14.40
  -8   8   0   41.30   11.00
  -8   8   0   24.30   13.60
   7  -8   0  141.19   14.20
   7  -8   0  131.59   15.70
   7  -8   0  116.19   20.80
   7  -8   0  136.49   11.30
  -7   8   0  124.79   22.80
  -7   8   0  131.59   15.90
  -7   8   0  116.69   19.60
  -7   8   0  115.09   22.10
  -7   8   0  116.49   17.80
  -7   8   0  143.59   17.70
  -7   8   0  149.59   25.80
   6  -8   0  553.84   48.70
   6  -8   0  578.94   41.70
   6  -8   0  618.84   43.10
   6  -8   0  542.25   42.50
  -6   8   0  552.64   42.70
  -6   8   0  600.64   45.50
  -6   8   0  462.95   47.80
  -6   8   0  595.84   42.40
  -6   8   0  507.15   46.20
  -6   8   0  580.24   50.09
  -6   8   0  548.45   50.79
  -6   8   0  650.73   47.30
   5  -8   0  207.08   18.90
   5  -8   0  203.68   20.50
   5  -8   0  212.28   26.50
   5  -8   0  215.38   19.00
  -5   8   0  162.18   24.90
  -5   8   0  251.27   21.80
  -5   8   0  227.28   27.30
  -5   8   0  218.88   21.50
  -5   8   0  199.28   28.60
  -5   8   0  178.18   25.90
  -5   8   0  171.18   23.50
  -5   8   0  230.88   19.40
  -5   8   0  248.78   19.10
   4  -8   0  267.37   24.30
   4  -8   0  307.57   24.20
   4  -8   0  273.17   23.80
   4  -8   0  302.87   28.20
  -4   8   0  322.27   29.40
  -4   8   0  332.37   29.30
  -4   8   0  279.77   25.70
  -4   8   0  345.37   31.00
  -4   8   0  330.07   23.90
  -4   8   0  282.67   24.00
  -4   8   0  271.77   28.70
  -4   8   0  301.57   25.70
  -4   8   0  272.97   27.10
   3  -8   0   -1.60    2.50
   3  -8   0    4.30    2.80
   3  -8   0   -3.50    2.00
   3  -8   0   -1.40    3.60
   3  -8   0    0.80    2.70
   3  -8   0   -1.60    4.10
   3  -8   0    0.40    2.00
   3  -8   0   -1.50    1.00
   3  -8   0    2.00    4.20
   3  -8   0    1.30    2.20
   3  -8   0   -0.20    1.10
  -3   8   0    1.80    2.70
  -3   8   0    4.50    3.50
  -3   8   0    2.50    4.60
  -3   8   0    0.90    2.90
  -3   8   0    3.80    3.50
  -3   8   0    0.80    5.00
  -3   8   0    6.30    5.80
  -3   8   0   -4.60    4.20
  -3   8   0   -0.70    2.90
   2  -8   0  314.27   22.90
   2  -8   0  337.17   22.30
   2  -8   0  307.67   24.70
   2  -8   0  311.17   25.60
   2  -8   0  283.47   26.90
   2  -8   0  300.87   22.30
   2  -8   0  318.47   22.80
   2  -8   0  292.57   22.40
   2  -8   0  346.67   24.10
   2  -8   0  300.97   23.50
   2  -8   0  314.87   24.70
   2  -8   0  308.27   25.80
   2  -8   0  354.96   26.30
   2  -8   0  236.28   24.00
  -2   8   0  297.17   24.30
  -2   8   0  296.27   26.90
  -2   8   0  301.67   25.50
  -2   8   0  316.67   24.10
  -2   8   0  351.76   28.30
  -2   8   0  330.67   25.30
  -2   8   0  269.57   26.50
  -2   8   0  307.87   29.30
  -2   8   0  283.47   27.00
  -2   8   0  319.07   23.80
   1  -8   0  560.34   39.30
   1  -8   0  518.45   36.60
   1  -8   0  534.95   35.30
   1  -8   0  526.25   37.20
   1  -8   0  481.45   38.30
   1  -8   0  371.76   38.70
   1  -8   0  505.95   37.60
   1  -8   0  476.65   39.30
   1  -8   0  481.85   37.90
   1  -8   0  491.55   37.50
   1  -8   0  475.15   37.20
   1  -8   0  511.15   36.20
   1  -8   0  505.15   35.60
  -1   8   0  528.65   39.50
  -1   8   0  468.25   41.30
  -1   8   0  549.35   37.40
  -1   8   0  523.55   40.00
  -1   8   0  492.25   38.10
  -1   8   0  513.15   38.80
  -1   8   0  521.75   37.00
  -1   8   0  538.95   36.50
  -1   8   0  529.85   37.60
  -1   8   0  539.95   40.00
   0  -8   0  614.64   42.50
   0  -8   0  533.35   38.90
   0  -8   0  502.05   41.10
   0  -8   0  542.65   38.70
   0  -8   0  551.04   40.50
   0  -8   0  526.45   40.10
   0  -8   0  567.64   40.40
   0  -8   0  528.65   41.60
   0  -8   0  548.85   40.20
   0  -8   0  580.44   38.30
   0  -8   0  516.85   40.00
   0  -8   0  566.34   41.60
   0   8   0  534.85   44.50
   0   8   0  583.24   39.90
   0   8   0  573.54   41.30
   0   8   0  539.45   40.80
   0   8   0  511.65   41.90
   0   8   0  563.04   39.90
   0   8   0  536.85   41.60
   0   8   0  549.15   39.90
   0   8   0  521.05   38.80
   0   8   0  592.84   40.90
  -1  -8   0  974.00   67.99
  -1  -8   0  981.10   66.59
  -1  -8   0  967.70   63.39
  -1  -8   0  917.71   63.99
  -1  -8   0  955.90   65.59
  -1  -8   0  882.51   65.39
  -1  -8   0  916.61   64.69
  -1  -8   0  933.01   66.79
  -1  -8   0  857.31   65.49
  -1  -8   0  967.80   65.89
  -1  -8   0  886.31   63.89
  -1  -8   0 1002.60   67.09
   1   8   0  972.30   65.49
   1   8   0  924.81   65.59
   1   8   0  888.21   69.79
   1   8   0  951.50   64.79
   1   8   0  966.40   65.19
   1   8   0  891.11   63.69
   1   8   0  983.00   66.39
   1   8   0  883.61   66.89
  -2  -8   0  114.29   11.10
  -2  -8   0  101.79   13.30
  -2  -8   0  115.99   15.10
  -2  -8   0  123.19   10.60
  -2  -8   0  108.49   13.10
  -2  -8   0  127.09   13.00
  -2  -8   0  132.99   11.30
  -2  -8   0   88.59   12.40
  -2  -8   0  142.69   17.00
  -2  -8   0  123.09   11.40
  -2  -8   0  130.39   12.50
   2   8   0  127.09   14.00
   2   8   0  130.69   12.30
   2   8   0  110.19   10.60
   2   8   0  125.19   11.80
   2   8   0  134.99   14.40
   2   8   0  129.09   13.10
   2   8   0  126.79   12.80
   2   8   0  125.89   15.20
   2   8   0  131.89   18.50
  -3  -8   0  282.77   22.60
  -3  -8   0  297.97   25.20
  -3  -8   0  299.67   22.00
  -3  -8   0  274.27   24.00
  -3  -8   0  272.47   26.40
  -3  -8   0  274.57   22.20
  -3  -8   0  289.57   21.40
   3   8   0  300.27   22.60
   3   8   0  286.57   19.40
   3   8   0  298.17   24.70
   3   8   0  269.57   22.50
   3   8   0  226.88   29.20
   3   8   0  320.67   23.30
   3   8   0  272.97   22.40
   3   8   0  273.67   23.60
   3   8   0  268.47   23.50
   3   8   0  289.17   22.90
  -4  -8   0  939.51   67.69
  -4  -8   0  966.40   66.19
  -4  -8   0  950.70   68.79
  -4  -8   0  868.01   70.59
  -4  -8   0  944.81   66.89
  -4  -8   0  931.51   65.49
  -4  -8   0  948.11   64.69
  -4  -8   0  931.71   64.99
  -4  -8   0  916.91   64.19
   4   8   0  936.61   67.19
   4   8   0  927.11   67.19
   4   8   0  920.31   65.59
   4   8   0  907.11   65.69
   4   8   0  848.82   71.09
   4   8   0  907.11   67.49
   4   8   0  956.30   65.89
   4   8   0  937.81   64.79
   4   8   0 1022.20   65.59
   4   8   0 1076.59   65.99
  -5  -8   0   92.89   11.60
  -5  -8   0   99.69   15.30
  -5  -8   0  101.79   11.10
  -5  -8   0   93.59   12.90
  -5  -8   0   83.89   11.50
  -5  -8   0   87.09   16.10
  -5  -8   0   91.59   14.10
   5   8   0   81.69   11.30
   5   8   0  116.29   13.00
   5   8   0  100.19    9.20
   5   8   0   91.89   11.20
   5   8   0  111.19   14.60
   5   8   0  106.49   13.90
   5   8   0   89.59   13.00
   5   8   0   80.59   15.70
   5   8   0   81.99   10.30
   5   8   0  102.29   12.50
  -6  -8   0  517.95   40.20
  -6  -8   0  521.85   39.00
  -6  -8   0  555.84   44.50
  -6  -8   0  501.15   41.40
  -6  -8   0  550.14   40.30
  -6  -8   0  488.65   42.60
  -6  -8   0  569.64   47.70
   6   8   0  468.15   45.20
   6   8   0  562.74   37.80
   6   8   0  547.05   40.40
   6   8   0  500.45   40.10
   6   8   0  576.54   38.90
   6   8   0  551.44   40.40
   6   8   0  541.15   39.90
   6   8   0  613.04   43.30
   6   8   0  547.85   42.10
  -7  -8   0   32.40    2.90
  -7  -8   0   40.10    6.90
  -7  -8   0   20.10    8.50
  -7  -8   0   28.50   10.60
  -7  -8   0   16.30    7.70
  -7  -8   0   27.40    6.80
  -7  -8   0   33.00    8.30
  -7  -8   0   37.00    7.40
   7   8   0   26.70    9.70
   7   8   0   33.50    4.90
   7   8   0   19.30    7.10
   7   8   0   37.00    7.60
   7   8   0   31.80    8.00
   7   8   0   32.10    5.70
   7   8   0   21.30    6.10
  -8  -8   0  540.35   51.19
  -8  -8   0  634.84   46.60
  -8  -8   0  596.34   48.80
  -8  -8   0  621.74   47.40
  -8  -8   0  595.84   50.99
  -8  -8   0  570.74   54.49
  -8  -8   0  611.54   45.40
  -8  -8   0  608.34   42.30
   8   8   0  633.84   46.90
   8   8   0  658.63   49.40
   8   8   0  733.03   47.50
   8   8   0  651.33   43.30
   8   8   0  651.93   50.39
   8   8   0  608.24   47.30
   8   8   0  673.83   53.69
  -9  -8   0  421.36   51.69
  -9  -8   0  485.35   38.30
  -9  -8   0  455.85   44.20
  -9  -8   0  516.65   40.90
  -9  -8   0  495.15   46.00
  -9  -8   0  529.85   42.90
   9   8   0  564.34   46.60
   9   8   0  525.05   42.50
   9   8   0  470.75   40.30
   9   8   0  503.35   42.20
   9   8   0  567.54   40.30
   9   8   0  531.35   36.10
   9   8   0  556.34   40.20
 -10  -8   0   -0.60    5.90
 -10  -8   0    0.20    6.60
 -10  -8   0   -3.70    3.80
 -10  -8   0    4.80    5.50
 -10  -8   0    7.60   10.20
 -10  -8   0    4.60    3.80
  10   8   0   -0.40    4.60
  10   8   0    5.00    6.80
  10   8   0    2.40    3.80
  10   8   0    2.50    4.30
  10   8   0    2.90    2.50
 -11  -8   0   89.09   20.60
 -11  -8   0  133.09   18.60
 -11  -8   0   73.49   18.20
  11   8   0   85.09   15.40
  11   8   0  111.89   14.10
 -12  -8   0    5.00    6.70
 -12  -8   0    5.60    9.70
 -12  -8   0    9.80    9.80
  12   8   0   12.40    6.90
  12   8   0   -1.10    5.90
 -13  -8   0   45.40   17.70
 -13  -8   0   88.69   24.20
  13   8   0  127.19   19.60
 -14  -8   0  126.79   29.50
 -14  -8   0  102.19   25.50
  14   8   0  190.78   24.70
 -15  -8   0  -14.60   10.20
 -15  -8   0  -11.90   10.40
  15   8   0   -7.50    7.00
 -11   9   0   -8.00   11.40
 -11   9   0   -8.00   10.40
 -10   9   0  120.99   22.50
 -10   9   0   72.99   21.40
 -10   9   0  165.98   32.10
  -9   9   0   38.40   11.60
  -9   9   0   30.40   16.00
  -9   9   0   47.10   13.40
  -9   9   0   19.60   13.10
   8  -9   0  180.68   21.40
   8  -9   0  110.29   22.40
  -8   9   0  148.59   26.60
  -8   9   0  186.78   31.10
  -8   9   0  141.09   20.40
  -8   9   0  154.48   24.00
   7  -9   0   55.19   14.90
   7  -9   0   38.80    8.50
  -7   9   0   30.20   13.90
  -7   9   0   42.10   11.70
  -7   9   0   41.50    8.70
  -7   9   0   45.00   14.20
  -7   9   0   35.20   13.50
  -7   9   0   36.90   10.40
   6  -9   0   38.90    6.50
   6  -9   0   53.19    9.50
   6  -9   0   50.09   14.00
  -6   9   0   49.70   11.90
  -6   9   0   25.00    8.80
  -6   9   0   44.50    8.30
  -6   9   0   39.60   10.80
  -6   9   0   52.09    9.30
  -6   9   0   49.00   14.10
  -6   9   0   47.60   13.50
  -6   9   0   36.80   13.50
   5  -9   0  410.66   32.20
   5  -9   0  427.96   30.90
   5  -9   0  349.77   35.60
   5  -9   0  350.76   30.70
  -5   9   0  408.66   33.00
  -5   9   0  410.46   35.80
  -5   9   0  393.56   44.60
  -5   9   0  401.26   34.10
  -5   9   0  375.86   31.00
  -5   9   0  345.07   37.10
  -5   9   0  437.36   39.00
  -5   9   0  354.76   30.10
  -5   9   0  378.46   36.40
   4  -9   0   47.50    8.20
   4  -9   0   34.10    9.50
   4  -9   0   17.90    7.20
   4  -9   0   31.40    7.30
  -4   9   0   24.20   10.10
  -4   9   0   40.30   12.10
  -4   9   0   49.99   11.50
  -4   9   0   32.80    8.30
  -4   9   0   41.40    7.20
  -4   9   0   47.80    9.70
  -4   9   0   37.70   10.90
  -4   9   0   47.90    8.40
  -4   9   0   42.50   11.90
   3  -9   0   35.20    9.70
   3  -9   0   54.89    9.00
   3  -9   0   44.30   10.70
   3  -9   0   62.39    5.30
   3  -9   0   33.60    5.20
   3  -9   0   49.30    8.50
   3  -9   0   57.79    9.40
   3  -9   0   65.69    9.30
  -3   9   0   77.09   10.70
  -3   9   0   62.69   13.90
  -3   9   0   37.00   11.10
  -3   9   0   56.29   10.00
  -3   9   0   61.59   11.80
  -3   9   0   61.79   12.30
  -3   9   0   62.59    9.30
  -3   9   0   52.29   12.50
  -3   9   0   44.00    7.60
   2  -9   0  265.27   30.00
   2  -9   0  285.47   27.30
   2  -9   0  352.76   24.10
   2  -9   0  378.86   30.10
   2  -9   0  386.86   26.00
   2  -9   0  344.97   25.40
   2  -9   0  375.96   28.60
   2  -9   0  397.56   29.90
   2  -9   0  343.77   28.50
   2  -9   0  380.16   26.20
   2  -9   0  364.96   27.00
   2  -9   0  362.56   31.70
  -2   9   0  372.26   29.10
  -2   9   0  393.16   30.20
  -2   9   0  368.76   31.60
  -2   9   0  432.16   32.10
  -2   9   0  346.87   31.50
  -2   9   0  359.86   27.80
  -2   9   0  383.06   27.80
  -2   9   0  385.66   31.80
  -2   9   0  376.76   34.30
  -2   9   0  338.87   28.10
   1  -9   0    5.70    4.40
   1  -9   0    5.20    3.30
   1  -9   0   -1.30    4.50
   1  -9   0    2.50    2.00
   1  -9   0    1.20    3.30
   1  -9   0    2.50    3.40
   1  -9   0    2.60    2.00
   1  -9   0   -0.20    2.20
   1  -9   0    3.90    3.50
   1  -9   0    3.20    2.80
   1  -9   0   -0.70    3.90
   1  -9   0    1.30    3.00
   1  -9   0    3.20    3.70
   1  -9   0    5.20    3.00
  -1   9   0    0.00    2.20
  -1   9   0    8.20    5.20
  -1   9   0   -2.20    2.60
  -1   9   0    1.10    4.70
  -1   9   0    0.20    3.50
  -1   9   0    1.20    2.90
  -1   9   0    1.50    2.50
  -1   9   0    6.30    4.50
  -1   9   0   -1.90    2.10
  -1   9   0    0.00    3.70
   0  -9   0  266.47   22.50
   0  -9   0  283.87   20.20
   0  -9   0  286.97   24.20
   0  -9   0  304.77   22.80
   0  -9   0  303.17   24.10
   0  -9   0  265.87   20.60
   0  -9   0  277.67   22.50
   0  -9   0  270.87   22.10
   0  -9   0  229.68   22.80
   0  -9   0  259.57   23.90
   0  -9   0  190.08   22.00
   0  -9   0  261.07   22.70
   0  -9   0  234.58   24.10
   0  -9   0  285.17   21.20
   0   9   0  285.97   21.20
   0   9   0  278.97   22.90
   0   9   0  270.37   24.10
   0   9   0  300.17   23.80
   0   9   0  256.07   26.70
   0   9   0  254.37   24.10
   0   9   0  249.08   21.60
   0   9   0  283.27   22.20
   0   9   0  267.77   23.10
   0   9   0  282.97   22.30
  -1  -9   0  264.87   22.00
  -1  -9   0  213.98   19.20
  -1  -9   0  235.48   18.90
  -1  -9   0  202.18   17.50
  -1  -9   0  217.58   19.10
  -1  -9   0  214.78   17.60
  -1  -9   0  197.58   18.90
  -1  -9   0  221.68   19.70
  -1  -9   0  219.38   16.90
  -1  -9   0  207.78   20.10
  -1  -9   0  227.08   20.20
  -1  -9   0  195.08   20.00
   1   9   0  199.58   17.30
   1   9   0  214.98   20.70
   1   9   0  187.18   25.10
   1   9   0  206.98   19.70
   1   9   0  205.88   19.10
   1   9   0  224.88   18.60
   1   9   0  252.17   19.40
   1   9   0  231.98   19.20
  -2  -9   0  330.27   24.30
  -2  -9   0  256.67   24.80
  -2  -9   0  317.07   26.70
  -2  -9   0  312.97   23.60
  -2  -9   0  321.57   25.50
  -2  -9   0  284.07   25.00
  -2  -9   0  309.97   25.10
  -2  -9   0  310.37   22.90
  -2  -9   0  325.47   23.90
  -2  -9   0  295.87   25.40
  -2  -9   0  353.66   28.70
   2   9   0  291.57   26.20
   2   9   0  296.37   29.80
   2   9   0  315.47   25.00
   2   9   0  304.87   25.60
   2   9   0  293.87   24.20
   2   9   0  286.67   25.00
   2   9   0  280.67   23.00
   2   9   0  308.07   24.40
   2   9   0  327.37   25.50
  -3  -9   0  114.39   13.50
  -3  -9   0  179.08   21.10
  -3  -9   0  141.49   16.00
  -3  -9   0  147.19   15.20
  -3  -9   0  147.99   12.50
  -3  -9   0  150.28   13.10
  -3  -9   0  144.09   18.00
  -3  -9   0  151.18   14.30
  -3  -9   0  134.99   13.00
   3   9   0  116.09   19.40
   3   9   0  140.59   13.60
   3   9   0  136.99   14.70
   3   9   0  146.39   10.60
   3   9   0  126.09   15.50
   3   9   0  129.69   16.10
   3   9   0  160.28   18.20
   3   9   0  154.38   16.00
   3   9   0  134.99   16.20
   3   9   0  130.29   13.60
  -4  -9   0  110.49   11.70
  -4  -9   0  108.79   11.30
  -4  -9   0   91.69   11.50
  -4  -9   0  101.79   15.10
  -4  -9   0  105.59   12.20
  -4  -9   0   98.29   14.20
  -4  -9   0   85.59   15.40
   4   9   0   99.19   12.00
   4   9   0   84.89   16.90
   4   9   0   95.09   12.20
   4   9   0   89.99   12.20
   4   9   0   93.09   13.90
   4   9   0   93.89   13.20
   4   9   0  116.09   12.80
   4   9   0  111.59   14.10
   4   9   0  102.99   12.70
  -5  -9   0  431.26   35.20
  -5  -9   0  355.16   36.50
  -5  -9   0  416.66   30.40
  -5  -9   0  403.06   29.80
  -5  -9   0  392.56   31.00
  -5  -9   0  363.56   32.10
  -5  -9   0  432.76   32.10
  -5  -9   0  375.26   33.40
   5   9   0  409.26   30.50
   5   9   0  363.06   31.00
   5   9   0  426.86   30.10
   5   9   0  436.46   33.40
   5   9   0  397.96   33.30
   5   9   0  434.16   31.40
   5   9   0  403.76   33.20
   5   9   0  299.07   35.50
   5   9   0  448.46   32.00
   5   9   0  405.16   31.50
  -6  -9   0  328.77   35.80
  -6  -9   0  369.66   33.70
  -6  -9   0  346.67   32.30
  -6  -9   0  354.56   28.60
  -6  -9   0  408.96   32.00
  -6  -9   0  387.86   30.50
  -6  -9   0  368.06   29.80
   6   9   0  351.46   29.80
   6   9   0  360.06   31.80
   6   9   0  358.76   30.00
   6   9   0  380.16   28.70
   6   9   0  398.56   32.50
   6   9   0  408.06   30.10
   6   9   0  382.96   30.20
   6   9   0  406.56   32.20
   6   9   0  401.06   27.80
   6   9   0  332.17   35.70
  -7  -9   0   24.30    6.20
  -7  -9   0   31.80    7.90
  -7  -9   0   34.60   10.00
  -7  -9   0   39.00   11.00
  -7  -9   0   23.70    6.40
  -7  -9   0   35.00   12.10
  -7  -9   0   33.90    7.80
   7   9   0   46.90    9.90
   7   9   0   22.70    6.10
   7   9   0   27.70    6.80
   7   9   0   15.00    8.50
   7   9   0   33.10    8.40
   7   9   0   31.30    4.80
   7   9   0   18.70    5.00
   7   9   0   23.50    6.50
  -8  -9   0  463.05   35.20
  -8  -9   0  437.96   39.10
  -8  -9   0  392.96   42.30
  -8  -9   0  399.66   39.30
  -8  -9   0  419.76   33.30
  -8  -9   0  393.86   34.70
  -8  -9   0  434.36   37.00
   8   9   0  415.06   36.70
   8   9   0  462.25   32.70
   8   9   0  441.46   35.40
   8   9   0  456.75   41.90
   8   9   0  474.25   35.00
   8   9   0  467.35   35.20
   8   9   0  439.56   30.80
   8   9   0  416.16   37.90
  -9  -9   0    1.80    3.90
  -9  -9   0   12.20    7.90
  -9  -9   0    8.10    7.60
  -9  -9   0   12.20   10.40
  -9  -9   0    6.60    5.40
  -9  -9   0    9.50    5.40
   9   9   0    4.10    4.70
   9   9   0   10.50    6.30
   9   9   0   17.60    6.40
   9   9   0    7.10    2.10
   9   9   0   13.00    7.90
   9   9   0   10.70    4.70
 -10  -9   0  432.76   54.89
 -10  -9   0  537.35   49.10
 -10  -9   0  486.25   43.70
 -10  -9   0  527.95   42.50
 -10  -9   0  453.95   46.10
  10   9   0  578.04   44.60
  10   9   0  492.45   41.90
  10   9   0  548.35   35.70
  10   9   0  530.65   41.00
 -11  -9   0    4.80    9.00
 -11  -9   0   15.90   10.10
 -11  -9   0   11.30    7.30
  11   9   0    6.70    5.60
  11   9   0   15.10    7.40
  11   9   0   10.20    5.60
 -12  -9   0   27.30   13.90
 -12  -9   0   24.30   13.80
 -12  -9   0   23.10    9.50
  12   9   0   23.70    8.80
 -13  -9   0   95.59   24.50
 -13  -9   0  114.59   19.90
 -13  -9   0   94.79   23.00
  13   9   0  134.59   18.40
  13   9   0  142.79   22.20
 -14  -9   0   15.90   14.70
 -14  -9   0   23.50   15.10
  14   9   0   16.00   10.20
 -15  -9   0  118.09   30.40
 -15  -9   0   99.29   26.60
  15   9   0  151.48   22.60
 -10  10   0   71.79   22.70
 -10  10   0   90.29   22.50
 -10  10   0   80.99   19.10
  -9  10   0   24.60   15.00
  -9  10   0   19.50   12.50
  -9  10   0    5.90    9.40
  -8  10   0  175.58   29.30
  -8  10   0  123.09   21.80
  -8  10   0  121.59   19.00
  -8  10   0   99.39   22.30
   7 -10   0   10.40    6.40
   7 -10   0   12.20    9.80
  -7  10   0   22.70   12.10
  -7  10   0    9.30    7.50
  -7  10   0   16.10   15.60
  -7  10   0    6.20    6.70
  -7  10   0   27.70   12.90
   6 -10   0  350.26   30.60
   6 -10   0  351.76   41.70
  -6  10   0  363.86   32.80
  -6  10   0  386.66   31.10
  -6  10   0  369.36   35.60
  -6  10   0  395.66   37.90
  -6  10   0  373.66   44.10
  -6  10   0  357.06   43.90
   5 -10   0   10.90    4.60
   5 -10   0   14.90    5.70
   5 -10   0   17.90    9.30
  -5  10   0   12.30    6.10
  -5  10   0    6.10    7.70
  -5  10   0   11.60    4.90
  -5  10   0   18.50    5.90
  -5  10   0    7.90    8.60
  -5  10   0    6.10    5.70
  -5  10   0   20.00    8.60
  -5  10   0   11.50    8.90
   4 -10   0  510.35   40.10
   4 -10   0  466.65   44.10
   4 -10   0  527.65   39.70
   4 -10   0  487.65   42.10
  -4  10   0  566.84   41.90
  -4  10   0  529.55   39.30
  -4  10   0  459.05   43.20
  -4  10   0  559.14   42.80
  -4  10   0  523.25   44.50
  -4  10   0  512.85   47.60
  -4  10   0  542.65   40.20
  -4  10   0  449.66   44.00
  -4  10   0  605.64   47.00
   3 -10   0 1214.88   86.29
   3 -10   0 1081.79   89.59
   3 -10   0 1196.48   86.09
  -3  10   0 1252.67   85.89
  -3  10   0 1205.78   84.89
  -3  10   0 1099.79   89.59
  -3  10   0 1269.87   90.49
  -3  10   0 1256.67   87.09
  -3  10   0 1289.07   88.29
  -3  10   0 1185.68   93.39
  -3  10   0 1370.46   91.59
  -3  10   0 1316.37   90.19
   2 -10   0   52.79    8.10
   2 -10   0   59.99    5.80
   2 -10   0   58.69    7.80
   2 -10   0   46.90   11.50
   2 -10   0   69.79    7.90
   2 -10   0   72.69    6.20
   2 -10   0   67.29   10.50
   2 -10   0   68.39   11.00
   2 -10   0   73.49   10.20
   2 -10   0   57.79   12.40
  -2  10   0   72.09   11.60
  -2  10   0   63.39   10.00
  -2  10   0   74.39   13.30
  -2  10   0   66.59    9.60
  -2  10   0   53.59   13.60
  -2  10   0   63.39   12.10
  -2  10   0   60.29    8.90
  -2  10   0   70.89   12.90
  -2  10   0   52.99    9.90
  -2  10   0   64.89   12.90
   1 -10   0  175.78   14.80
   1 -10   0  172.78   21.40
   1 -10   0  127.29   17.80
   1 -10   0  211.78   15.30
   1 -10   0  181.58   18.30
   1 -10   0  205.78   16.90
   1 -10   0  191.68   16.00
   1 -10   0  146.29   21.40
   1 -10   0  190.78   22.90
   1 -10   0  213.38   17.90
   1 -10   0  198.98   15.10
   1 -10   0  192.68   15.80
   1 -10   0  181.28   19.60
  -1  10   0  193.38   17.50
  -1  10   0  217.88   19.30
  -1  10   0  193.28   16.60
  -1  10   0  177.68   19.00
  -1  10   0  160.38   16.40
  -1  10   0  158.08   24.00
  -1  10   0  154.68   21.10
  -1  10   0  196.78   19.10
  -1  10   0  187.48   22.40
  -1  10   0  203.08   18.00
   0 -10   0  179.28   16.30
   0 -10   0  218.38   18.10
   0 -10   0  150.98   24.00
   0 -10   0  201.28   18.50
   0 -10   0  177.98   16.90
   0 -10   0  224.58   18.40
   0 -10   0  181.38   22.70
   0 -10   0  185.98   15.30
   0 -10   0  177.98   18.10
   0 -10   0  207.48   19.60
   0 -10   0  192.78   18.10
   0 -10   0  192.38   19.00
   0 -10   0  174.78   21.00
   0 -10   0  197.58   15.80
   0  10   0  155.48   21.20
   0  10   0  172.18   24.90
   0  10   0  231.18   18.20
   0  10   0  201.58   22.30
   0  10   0  181.18   17.20
   0  10   0  170.58   16.20
   0  10   0  182.68   18.60
   0  10   0  186.68   18.50
   0  10   0  199.68   17.60
   0  10   0  213.58   18.80
  -1 -10   0  249.08   21.50
  -1 -10   0  219.88   19.60
  -1 -10   0  243.38   22.70
  -1 -10   0  227.48   22.40
  -1 -10   0  251.37   21.60
  -1 -10   0  284.17   21.50
  -1 -10   0  251.17   21.50
  -1 -10   0  230.78   22.20
  -1 -10   0  257.17   19.10
  -1 -10   0  213.18   21.50
  -1 -10   0  243.08   19.60
  -1 -10   0  252.47   23.60
   1  10   0  266.17   20.10
   1  10   0  241.28   21.80
   1  10   0  245.98   21.30
   1  10   0  245.58   30.20
   1  10   0  248.88   21.00
   1  10   0  223.48   25.60
   1  10   0  252.97   21.30
   1  10   0  218.08   22.00
  -2 -10   0  359.46   32.60
  -2 -10   0  414.66   30.70
  -2 -10   0  420.56   32.70
  -2 -10   0  501.95   35.10
  -2 -10   0  374.26   33.40
  -2 -10   0  420.66   30.80
  -2 -10   0  400.66   32.30
  -2 -10   0  423.36   33.00
  -2 -10   0  402.46   29.80
  -2 -10   0  384.66   32.60
  -2 -10   0  395.96   31.30
  -2 -10   0  446.76   35.80
   2  10   0  431.46   32.70
   2  10   0  355.56   37.00
   2  10   0  381.06   32.70
   2  10   0  437.26   32.80
   2  10   0  439.06   32.00
   2  10   0  467.55   33.60
   2  10   0  354.16   29.90
   2  10   0  381.86   33.90
   2  10   0  413.16   31.90
  -3 -10   0    8.40    3.90
  -3 -10   0   15.50    3.80
  -3 -10   0   15.30    4.60
  -3 -10   0   13.70    5.20
  -3 -10   0   17.80    5.70
  -3 -10   0   15.10    6.20
  -3 -10   0   21.70    6.80
  -3 -10   0   20.80    5.10
  -3 -10   0   19.70    7.90
   3  10   0   12.70    4.90
   3  10   0   21.20    6.90
   3  10   0    6.60    4.70
   3  10   0   19.10    3.20
   3  10   0   16.90    5.60
   3  10   0   14.00    5.40
   3  10   0   14.00    8.00
   3  10   0   17.10    5.20
   3  10   0   10.80    4.60
  -4 -10   0  460.55   35.60
  -4 -10   0  442.56   41.60
  -4 -10   0  517.75   35.50
  -4 -10   0  470.95   36.30
  -4 -10   0  534.35   38.20
  -4 -10   0  507.55   40.40
  -4 -10   0  469.15   36.70
  -4 -10   0  443.86   38.50
  -4 -10   0  509.75   36.30
   4  10   0  465.15   37.00
   4  10   0  487.25   37.00
   4  10   0  489.75   39.30
   4  10   0  510.75   38.90
   4  10   0  477.05   31.80
   4  10   0  521.55   37.10
   4  10   0  480.65   36.80
   4  10   0  538.15   39.10
   4  10   0  497.85   37.40
   4  10   0  380.76   41.90
  -5 -10   0  377.46   31.30
  -5 -10   0  369.16   29.00
  -5 -10   0  371.66   29.60
  -5 -10   0  336.67   35.20
  -5 -10   0  349.07   32.90
  -5 -10   0  350.36   32.10
  -5 -10   0  423.06   28.70
  -5 -10   0  397.06   28.90
   5  10   0  318.27   39.10
   5  10   0  321.77   31.30
   5  10   0  369.36   30.00
   5  10   0  400.06   30.50
   5  10   0  374.16   30.10
   5  10   0  365.76   31.40
   5  10   0  410.46   30.20
   5  10   0  420.56   32.60
   5  10   0  346.97   28.90
  -6 -10   0   24.90    7.30
  -6 -10   0   38.00    7.60
  -6 -10   0   25.50   10.80
  -6 -10   0   23.40    5.90
  -6 -10   0   29.70    9.50
  -6 -10   0   38.80    6.70
  -6 -10   0   25.10    8.60
  -6 -10   0   36.00    8.10
   6  10   0   30.40    8.60
   6  10   0   38.10    7.70
   6  10   0   32.60    7.40
   6  10   0   24.70    7.80
   6  10   0   34.20    6.40
   6  10   0   20.80    6.30
   6  10   0   30.20    7.30
   6  10   0   40.80   12.90
   6  10   0   32.20    8.40
  -7 -10   0  291.27   25.10
  -7 -10   0  293.67   23.40
  -7 -10   0  297.57   24.90
  -7 -10   0  288.97   26.20
  -7 -10   0  298.97   36.70
  -7 -10   0  286.37   28.10
  -7 -10   0  282.77   28.80
   7  10   0  238.98   33.40
   7  10   0  275.47   29.60
   7  10   0  285.97   24.40
   7  10   0  302.17   27.20
   7  10   0  288.47   24.70
   7  10   0  291.67   26.70
   7  10   0  271.77   22.50
   7  10   0  284.27   24.70
   7  10   0  222.88   23.60
  -8 -10   0   18.80    6.50
  -8 -10   0   18.20    8.80
  -8 -10   0   16.80   10.90
  -8 -10   0   11.80    6.10
  -8 -10   0   32.30    8.20
  -8 -10   0   15.40    8.80
  -8 -10   0   18.40    5.80
   8  10   0    0.90    2.70
   8  10   0   12.10    5.90
   8  10   0   27.60    4.30
   8  10   0   21.10    7.60
   8  10   0   23.20   10.30
   8  10   0   32.40    7.90
   8  10   0   30.70    6.00
  -9 -10   0  335.57   30.30
  -9 -10   0  325.27   26.30
  -9 -10   0  297.87   32.00
  -9 -10   0  290.17   36.60
  -9 -10   0  281.37   39.70
  -9 -10   0  306.67   28.00
   9  10   0  348.37   39.50
   9  10   0  353.26   28.30
   9  10   0  324.37   30.30
   9  10   0  284.27   27.50
   9  10   0  316.77   27.60
 -10 -10   0   23.70   10.80
 -10 -10   0   12.70    9.40
 -10 -10   0   25.70    7.90
  10  10   0   19.20    7.20
  10  10   0   29.60    8.50
 -11 -10   0   43.50   11.30
 -11 -10   0   27.70   12.80
 -11 -10   0   33.60   13.70
  11  10   0   37.50   10.10
  11  10   0   37.10   11.00
 -12 -10   0  645.74   59.39
 -12 -10   0  656.73   51.19
 -12 -10   0  469.95   53.69
  12  10   0  601.44   49.80
  12  10   0  691.03   51.69
 -13 -10   0   14.10    7.90
 -13 -10   0   -5.10    8.50
 -13 -10   0    6.70   12.30
  13  10   0    7.50    6.40
  13  10   0    7.30    7.90
 -14 -10   0   95.29   24.90
 -14 -10   0   97.19   26.00
  14  10   0  113.79   20.40
 -15 -10   0   14.00   14.70
 -15 -10   0   26.60   16.90
  15  10   0   36.90   12.70
  -9  11   0  151.48   28.50
  -9  11   0  119.99   23.20
  -9  11   0  128.09   27.90
  -8  11   0    9.50    8.90
  -8  11   0    7.40   10.00
  -8  11   0   -0.70   10.90
  -7  11   0   49.60   12.30
  -7  11   0   43.40   15.60
  -7  11   0   31.90   12.40
  -7  11   0   60.49   16.50
   6 -11   0   89.49   13.60
   6 -11   0   62.59   16.60
  -6  11   0   65.79   16.90
  -6  11   0   66.19   15.90
  -6  11   0  110.89   23.70
  -6  11   0  114.19   22.00
  -6  11   0   99.89   16.10
   5 -11   0   45.50   13.30
   5 -11   0   37.80    8.60
   5 -11   0   43.10    6.70
  -5  11   0   39.50   11.90
  -5  11   0   42.70   14.10
  -5  11   0   39.70   13.70
  -5  11   0   36.70    8.70
  -5  11   0   32.80    9.10
  -5  11   0   65.59   15.10
   4 -11   0  170.48   25.00
   4 -11   0  186.68   21.00
   4 -11   0  188.58   17.80
  -4  11   0  212.48   24.50
  -4  11   0  163.38   19.10
  -4  11   0  189.48   29.40
  -4  11   0  228.28   28.60
  -4  11   0  189.08   26.10
  -4  11   0  176.58   20.20
  -4  11   0  214.18   22.60
  -4  11   0  202.38   25.60
   3 -11   0    0.10    3.80
   3 -11   0    3.20    5.40
   3 -11   0    1.10    3.50
  -3  11   0    2.20    5.90
  -3  11   0   -0.70    3.70
  -3  11   0    1.70    4.60
  -3  11   0   -0.90    3.20
  -3  11   0    0.50    5.40
  -3  11   0    0.40    3.50
  -3  11   0   -6.10    5.00
  -3  11   0    6.40    5.00
  -3  11   0   -6.20    4.80
   2 -11   0  354.16   33.50
   2 -11   0  361.96   30.30
   2 -11   0  365.86   30.60
   2 -11   0  370.06   30.40
   2 -11   0  277.17   31.30
   2 -11   0  362.86   25.60
  -2  11   0  389.36   32.60
  -2  11   0  350.96   28.80
  -2  11   0  369.96   33.90
  -2  11   0  356.96   29.00
  -2  11   0  369.46   30.50
  -2  11   0  389.96   32.00
  -2  11   0  414.46   38.40
  -2  11   0  367.66   33.60
  -2  11   0  400.06   33.50
  -2  11   0  368.96   30.00
   1 -11   0  303.97   27.50
   1 -11   0  224.78   30.50
   1 -11   0  307.87   28.00
   1 -11   0  372.56   27.80
   1 -11   0  352.36   25.90
   1 -11   0  329.27   24.30
   1 -11   0  327.57   23.80
   1 -11   0  338.17   22.50
   1 -11   0  343.57   22.80
   1 -11   0  319.27   24.20
   1 -11   0  328.97   30.60
   1 -11   0  241.48   25.60
  -1  11   0  363.96   27.70
  -1  11   0  298.77   25.70
  -1  11   0  310.77   26.40
  -1  11   0  311.87   37.20
  -1  11   0  373.16   29.50
  -1  11   0  329.67   27.50
  -1  11   0  363.06   30.00
  -1  11   0  354.86   29.20
  -1  11   0  265.07   31.80
  -1  11   0  370.36   31.20
   0 -11   0  591.94   43.20
   0 -11   0  617.14   44.60
   0 -11   0  565.64   48.10
   0 -11   0  644.64   47.80
   0 -11   0  706.03   46.90
   0 -11   0  663.33   45.80
   0 -11   0  626.34   43.10
   0 -11   0  539.95   48.40
   0 -11   0  647.74   47.30
   0 -11   0  602.64   45.50
   0  11   0  551.84   46.70
   0  11   0  586.34   48.80
   0  11   0  669.43   46.20
   0  11   0  603.74   47.30
   0  11   0  674.33   49.10
   0  11   0  617.44   46.70
   0  11   0  504.95   51.49
   0  11   0  624.94   44.70
   0  11   0  607.54   45.70
  -1 -11   0  146.69   17.30
  -1 -11   0  177.18   17.00
  -1 -11   0  153.18   19.70
  -1 -11   0  190.98   20.70
  -1 -11   0  138.49   19.10
  -1 -11   0  219.58   20.30
  -1 -11   0  178.68   15.20
  -1 -11   0  170.48   17.10
  -1 -11   0  163.38   14.40
  -1 -11   0  156.18   19.40
   1  11   0  197.58   27.00
   1  11   0  188.58   18.80
   1  11   0  163.38   18.50
   1  11   0  166.18   17.40
   1  11   0  166.48   15.40
   1  11   0  186.98   17.40
   1  11   0  167.28   21.20
   1  11   0  174.18   20.10
  -2 -11   0    8.70    4.50
  -2 -11   0   13.90    5.80
  -2 -11   0    6.40    3.60
  -2 -11   0    6.20    3.40
  -2 -11   0    0.00    3.50
  -2 -11   0    5.90    5.80
  -2 -11   0    5.20    4.00
  -2 -11   0    2.50    4.10
  -2 -11   0    6.60    5.00
  -2 -11   0   13.70    6.60
  -2 -11   0    3.90    2.80
  -2 -11   0    4.10    3.60
   2  11   0    5.90    4.90
   2  11   0    8.30    3.40
   2  11   0    4.00    6.30
   2  11   0    7.70    4.40
   2  11   0    6.00    4.70
   2  11   0    3.80    4.00
   2  11   0    0.00    3.50
   2  11   0    2.10    3.50
   2  11   0    5.80    4.00
  -3 -11   0  408.76   33.30
  -3 -11   0  450.85   37.10
  -3 -11   0  392.86   34.20
  -3 -11   0  365.16   32.10
  -3 -11   0  417.46   31.20
  -3 -11   0  388.86   30.50
  -3 -11   0  372.16   30.10
  -3 -11   0  408.86   32.70
  -3 -11   0  382.76   29.50
   3  11   0  396.36   34.30
   3  11   0  420.36   32.90
   3  11   0  398.26   31.60
   3  11   0  417.76   31.90
   3  11   0  402.76   28.00
   3  11   0  349.27   37.80
   3  11   0  416.36   32.50
   3  11   0  393.56   32.10
   3  11   0  383.06   33.00
  -4 -11   0  121.99   17.80
  -4 -11   0  158.38   22.20
  -4 -11   0  126.79   14.00
  -4 -11   0  141.19   16.90
  -4 -11   0  106.49   13.90
  -4 -11   0  142.79   16.20
  -4 -11   0  115.39   16.70
  -4 -11   0  111.09   12.70
  -4 -11   0  120.59   16.10
  -4 -11   0  120.49   14.20
   4  11   0  121.49   15.30
   4  11   0  125.79   15.90
   4  11   0   90.69   19.80
   4  11   0  119.89   14.90
   4  11   0  130.79    9.10
   4  11   0  121.69   15.10
   4  11   0  124.59   16.60
   4  11   0  119.89   16.40
   4  11   0  132.29   18.00
  -5 -11   0    3.80    5.00
  -5 -11   0    3.70    3.60
  -5 -11   0    2.10    2.60
  -5 -11   0    3.90    3.50
  -5 -11   0    3.40    3.20
  -5 -11   0   -3.10    5.30
  -5 -11   0   11.80    5.40
  -5 -11   0    8.00    5.90
  -5 -11   0    3.80    3.80
   5  11   0    6.00    5.20
   5  11   0   -1.80    2.80
   5  11   0    0.90    6.30
   5  11   0    4.80    4.30
   5  11   0   -1.80    3.00
   5  11   0    2.50    4.20
   5  11   0    6.60    4.70
   5  11   0    5.10    4.00
   5  11   0    9.10    4.60
  -6 -11   0   94.29   16.90
  -6 -11   0   92.79   13.00
  -6 -11   0  112.69   12.80
  -6 -11   0   54.29   11.20
  -6 -11   0   80.89   17.80
  -6 -11   0   76.99   15.00
  -6 -11   0   98.99   11.80
  -6 -11   0  112.79   15.40
   6  11   0  104.99   12.70
   6  11   0  101.99   15.70
   6  11   0  121.39   14.70
   6  11   0  112.29   16.70
   6  11   0  138.59   16.00
   6  11   0   90.39   19.10
   6  11   0  101.09   13.80
   6  11   0  107.59   14.10
   6  11   0  100.89   15.70
  -7 -11   0  557.74   45.30
  -7 -11   0  592.54   54.49
  -7 -11   0  628.64   46.80
  -7 -11   0  576.64   43.80
  -7 -11   0  552.84   50.09
  -7 -11   0  502.55   48.10
  -7 -11   0  602.64   44.40
  -7 -11   0  622.04   48.00
   7  11   0  644.64   44.40
   7  11   0  672.13   47.00
   7  11   0  517.05   52.69
   7  11   0  622.64   46.30
   7  11   0  560.14   45.90
   7  11   0  659.63   46.40
   7  11   0  638.64   49.20
   7  11   0  648.64   48.90
  -8 -11   0  432.56   36.50
  -8 -11   0  384.96   37.80
  -8 -11   0  406.26   35.20
  -8 -11   0  389.86   34.00
  -8 -11   0  365.46   38.30
  -8 -11   0  433.26   43.60
  -8 -11   0  378.76   32.30
   8  11   0  400.46   34.30
   8  11   0  402.46   46.90
   8  11   0  426.76   34.60
   8  11   0  439.16   32.10
   8  11   0  486.55   35.10
   8  11   0  393.96   36.60
   8  11   0  485.35   38.00
  -9 -11   0   74.69   20.60
  -9 -11   0   97.39   16.10
  -9 -11   0   69.09   16.20
  -9 -11   0  107.39   14.80
  -9 -11   0  106.39   15.60
  -9 -11   0   67.79   17.10
   9  11   0   94.49   11.70
   9  11   0  119.19   17.90
   9  11   0   84.69   13.80
 -10 -11   0   14.60   10.00
 -10 -11   0   29.70   12.30
 -10 -11   0   15.30    6.70
  10  11   0   17.00    7.00
 -11 -11   0  293.87   40.70
 -11 -11   0  384.06   33.10
 -11 -11   0  333.87   43.40
  11  11   0  363.76   32.60
  11  11   0  349.07   33.90
 -12 -11   0  101.99   23.10
 -12 -11   0  112.09   25.60
 -12 -11   0  121.79   19.60
  12  11   0  122.39   19.10
  12  11   0  117.09   19.90
 -13 -11   0   76.79   21.70
 -13 -11   0   88.29   17.70
 -13 -11   0   90.99   22.80
  13  11   0  107.09   17.70
 -14 -11   0   49.30   19.60
 -14 -11   0   86.49   18.00
 -14 -11   0   89.89   25.50
  14  11   0  130.09   21.70
 -15 -11   0    4.30   12.70
 -15 -11   0   38.60   19.20
  15  11   0   34.90   13.20
  -9  12   0   58.89   20.40
  -9  12   0   68.19   20.60
  -9  12   0   57.99   16.80
  -8  12   0   38.60   16.70
  -8  12   0   32.30   14.30
  -8  12   0   16.70   11.00
  -7  12   0  214.58   31.80
  -7  12   0  220.58   33.30
  -7  12   0  155.78   26.90
   6 -12   0    3.40    5.50
  -6  12   0    4.50    7.50
  -6  12   0   20.50   10.90
  -6  12   0    4.10    6.80
  -6  12   0    3.40    8.70
   5 -12   0  309.17   38.00
   5 -12   0  278.57   27.40
  -5  12   0  269.27   35.30
  -5  12   0  300.17   32.10
  -5  12   0  340.97   34.50
  -5  12   0  305.77   43.20
  -5  12   0  339.07   29.80
   4 -12   0   16.60    8.30
   4 -12   0   19.40    6.90
   4 -12   0   13.30    5.10
  -4  12   0   13.60   10.10
  -4  12   0   20.50   10.20
  -4  12   0   12.00    7.60
  -4  12   0   18.20    6.70
  -4  12   0    6.40    7.20
  -4  12   0   14.00    6.90
   3 -12   0  139.19   17.40
   3 -12   0  105.09   19.70
   3 -12   0  120.19   15.40
  -3  12   0  125.39   16.20
  -3  12   0  140.29   20.40
  -3  12   0  119.19   15.00
  -3  12   0  158.88   26.80
  -3  12   0  143.09   20.80
  -3  12   0  119.49   21.10
  -3  12   0  101.59   18.50
  -3  12   0  148.59   18.00
   2 -12   0  241.78   30.10
   2 -12   0  259.17   23.90
   2 -12   0  223.18   25.50
  -2  12   0  306.37   26.70
  -2  12   0  285.27   31.90
  -2  12   0  238.88   29.70
  -2  12   0  318.67   26.70
  -2  12   0  260.87   23.60
  -2  12   0  232.38   22.10
  -2  12   0  255.47   22.60
  -2  12   0  205.38   32.20
  -2  12   0  282.77   27.00
  -2  12   0  250.07   23.60
   1 -12   0   30.50    8.10
   1 -12   0   26.30    7.90
   1 -12   0   22.50    5.80
   1 -12   0   20.90    8.40
   1 -12   0   26.20    4.10
   1 -12   0   22.80    3.50
   1 -12   0   22.50    5.10
   1 -12   0   27.90    7.00
  -1  12   0   34.90    7.50
  -1  12   0   14.10    6.20
  -1  12   0    1.00    6.70
  -1  12   0   34.00   10.20
  -1  12   0   34.10    8.70
  -1  12   0   31.80    8.70
  -1  12   0   36.70    8.20
  -1  12   0   40.70   10.40
  -1  12   0   20.00    5.60
  -1  12   0    2.90    6.00
   0 -12   0  380.16   28.60
   0 -12   0  371.36   28.30
   0 -12   0  270.07   29.80
   0 -12   0  364.26   30.40
   0 -12   0  374.26   32.00
   0 -12   0  409.66   27.70
   0 -12   0  376.56   33.60
   0 -12   0  353.56   31.40
   0 -12   0  272.47   32.20
   0 -12   0  376.06   27.40
   0 -12   0  392.26   29.80
   0  12   0  368.86   43.10
   0  12   0  355.06   30.30
   0  12   0  374.26   29.30
   0  12   0  403.96   32.70
   0  12   0  419.76   31.10
   0  12   0  408.76   34.80
   0  12   0  392.56   31.60
   0  12   0  396.16   33.60
  -1 -12   0    2.40    3.60
  -1 -12   0    7.60    4.60
  -1 -12   0   14.90    6.10
  -1 -12   0    3.00    4.50
  -1 -12   0   11.10    3.60
  -1 -12   0    9.30    3.50
  -1 -12   0    8.10    6.10
  -1 -12   0    8.40    5.60
  -1 -12   0    5.70    4.80
   1  12   0    8.30    7.60
   1  12   0    3.20    4.30
   1  12   0   -4.20    3.30
   1  12   0    3.30    3.20
   1  12   0    6.10    4.50
   1  12   0    4.90    3.80
   1  12   0   10.70    5.90
   1  12   0   12.10    6.30
   1  12   0    3.80    4.30
  -2 -12   0  374.66   30.50
  -2 -12   0  352.66   31.10
  -2 -12   0  319.87   30.50
  -2 -12   0  375.56   27.10
  -2 -12   0  350.06   27.60
  -2 -12   0  350.86   31.60
  -2 -12   0  349.87   30.90
  -2 -12   0  377.96   30.00
   2  12   0  395.66   30.90
   2  12   0  309.97   31.50
   2  12   0  373.76   43.00
   2  12   0  357.16   30.10
   2  12   0  306.57   29.80
   2  12   0  361.46   31.20
   2  12   0  367.06   29.70
   2  12   0  336.97   29.00
  -3 -12   0  260.97   26.90
  -3 -12   0  306.57   27.60
  -3 -12   0  385.46   30.00
  -3 -12   0  249.58   27.70
  -3 -12   0  317.47   30.70
  -3 -12   0  309.57   27.30
  -3 -12   0  318.77   25.20
  -3 -12   0  296.47   25.00
  -3 -12   0  309.57   24.20
   3  12   0  322.17   27.40
   3  12   0  316.37   26.60
   3  12   0  336.17   28.70
   3  12   0  309.77   27.10
   3  12   0  297.87   28.90
   3  12   0  314.87   26.40
   3  12   0  300.07   38.30
   3  12   0  314.47   23.40
   3  12   0  319.17   27.50
  -4 -12   0   14.80    5.20
  -4 -12   0   12.90    5.60
  -4 -12   0   13.20    6.80
  -4 -12   0   22.70    7.20
  -4 -12   0   32.00   10.50
  -4 -12   0   18.10    5.00
  -4 -12   0   12.80    5.70
  -4 -12   0   15.80    7.10
  -4 -12   0    9.10    4.70
   4  12   0   24.40    8.20
   4  12   0   19.90    6.50
   4  12   0   25.90    7.20
   4  12   0   15.80    6.30
   4  12   0    9.40    8.40
   4  12   0   25.30    6.90
   4  12   0   19.10    6.40
   4  12   0   21.80    7.30
   4  12   0   18.60    2.80
  -5 -12   0  778.32   58.29
  -5 -12   0  779.02   61.59
  -5 -12   0  785.92   62.89
  -5 -12   0  828.12   57.69
  -5 -12   0  760.72   60.29
  -5 -12   0  794.32   65.99
  -5 -12   0  862.01   60.59
  -5 -12   0  800.72   58.89
  -5 -12   0  828.12   57.29
   5  12   0  832.52   58.99
   5  12   0  764.62   59.29
   5  12   0  857.61   62.99
   5  12   0  860.21   62.09
   5  12   0  852.71   59.59
   5  12   0  816.12   59.49
   5  12   0  699.73   66.89
  -6 -12   0  169.58   18.30
  -6 -12   0  170.88   19.60
  -6 -12   0  186.58   18.70
  -6 -12   0  167.38   20.70
  -6 -12   0  178.78   25.00
  -6 -12   0  147.09   25.40
  -6 -12   0  186.88   22.20
  -6 -12   0  203.48   24.90
   6  12   0  205.18   24.50
   6  12   0  185.88   21.40
   6  12   0  202.88   18.10
   6  12   0  180.68   22.70
   6  12   0  174.08   18.60
   6  12   0  192.98   21.00
   6  12   0  198.88   19.10
   6  12   0  182.88   29.60
  -7 -12   0  169.98   20.90
  -7 -12   0  215.78   28.20
  -7 -12   0  227.78   32.00
  -7 -12   0  217.58   19.20
  -7 -12   0  183.38   18.10
  -7 -12   0  221.18   25.00
  -7 -12   0  177.38   25.60
   7  12   0  206.88   20.50
   7  12   0  165.48   24.00
   7  12   0  225.38   26.10
   7  12   0  218.18   21.10
   7  12   0  220.68   19.20
   7  12   0  255.57   24.10
   7  12   0  186.98   30.00
   7  12   0  217.58   26.00
  -8 -12   0  116.59   20.90
  -8 -12   0  145.09   20.30
  -8 -12   0  112.79   15.00
  -8 -12   0  138.29   17.40
  -8 -12   0  131.99   21.50
   8  12   0   98.69   22.30
   8  12   0  161.58   16.10
   8  12   0  119.79   17.10
   8  12   0  163.08   21.30
   8  12   0  135.09   20.20
  -9 -12   0    3.50    7.60
  -9 -12   0   10.20    8.50
  -9 -12   0   -2.60    3.80
   9  12   0   12.50    5.80
   9  12   0   12.70    4.80
   9  12   0   11.00    7.20
   9  12   0    9.50    6.80
 -10 -12   0   15.10    6.90
 -10 -12   0   24.00   11.90
 -10 -12   0   19.10   11.10
  10  12   0   31.90   11.00
  10  12   0   18.10    7.50
 -11 -12   0   38.70   14.90
 -11 -12   0   29.20   13.60
 -11 -12   0   40.30   10.70
  11  12   0   55.39   12.20
 -12 -12   0   87.79   21.80
 -12 -12   0   90.89   16.90
 -12 -12   0   97.79   23.80
  12  12   0   98.69   18.40
  12  12   0   81.39   15.30
 -13 -12   0  196.38   26.10
 -13 -12   0  151.58   31.10
 -13 -12   0  155.98   29.90
  13  12   0  185.08   24.30
  13  12   0  154.48   23.10
 -14 -12   0    1.30   11.40
 -14 -12   0   -4.30   10.70
 -14 -12   0   -2.00    7.50
 -15 -12   0   61.59   22.80
 -15 -12   0   46.40   19.30
  15  12   0   79.09   18.90
  -8  13   0  237.28   34.80
  -8  13   0  138.59   28.50
  -8  13   0  185.68   30.10
  -7  13   0   17.40   11.80
  -7  13   0   11.80   11.40
  -7  13   0    6.60    9.60
  -6  13   0   54.89   16.40
  -6  13   0   64.29   16.60
  -6  13   0   66.69   17.50
   5 -13   0   53.79   11.30
  -5  13   0   68.69   16.50
  -5  13   0   55.89   15.30
  -5  13   0   55.49   12.90
  -5  13   0   53.09   15.50
   4 -13   0   75.09   17.30
   4 -13   0   90.99    8.50
   4 -13   0   69.59   13.20
  -4  13   0   69.49   16.70
  -4  13   0   83.89   17.20
  -4  13   0   80.79   14.50
  -4  13   0   82.99   17.50
   3 -13   0  363.16   33.60
   3 -13   0  426.46   32.00
   3 -13   0  385.66   42.70
  -3  13   0  420.26   37.70
  -3  13   0  421.86   34.80
  -3  13   0  407.46   48.70
  -3  13   0  379.76   33.00
  -3  13   0  326.47   39.80
  -3  13   0  377.66   35.90
   2 -13   0   -2.20    3.20
   2 -13   0   -0.90    4.10
   2 -13   0   -1.80    5.10
  -2  13   0   -4.80    3.40
  -2  13   0   -2.30    3.90
  -2  13   0   -2.20    6.70
  -2  13   0   -9.10    3.90
  -2  13   0    0.10    3.90
  -2  13   0    0.70    5.10
  -2  13   0    0.80    5.50
   1 -13   0  257.27   27.90
   1 -13   0  222.38   29.10
   1 -13   0  241.88   24.10
  -1  13   0  307.47   26.30
  -1  13   0  267.27   23.90
  -1  13   0  280.07   31.10
  -1  13   0  246.08   22.40
  -1  13   0  251.57   30.70
  -1  13   0  246.28   25.00
  -1  13   0  221.08   34.00
  -1  13   0  245.08   25.50
  -1  13   0  275.47   23.40
   0 -13   0  195.88   15.10
   0 -13   0  190.88   17.30
   0 -13   0  181.48   18.50
   0 -13   0  152.28   21.00
   0 -13   0  176.08   23.50
   0 -13   0  177.98   21.90
   0 -13   0  187.68   15.70
   0  13   0  185.18   23.20
   0  13   0  202.18   21.50
   0  13   0  166.98   24.40
   0  13   0  196.38   19.90
   0  13   0  167.28   29.00
   0  13   0  182.28   23.60
   0  13   0  194.48   19.90
   0  13   0  201.58   21.30
  -1 -13   0    7.10    3.20
  -1 -13   0    6.20    3.50
  -1 -13   0   12.60    6.80
  -1 -13   0    5.40    5.60
  -1 -13   0   12.10    5.20
  -1 -13   0    6.80    4.50
  -1 -13   0   18.60    6.20
  -1 -13   0    5.50    5.40
  -1 -13   0   14.40    7.10
   1  13   0   12.60    6.50
   1  13   0   19.70    7.70
   1  13   0    5.10    3.90
   1  13   0    4.80    5.80
   1  13   0   10.50    5.30
   1  13   0   15.00    6.40
   1  13   0   16.00    6.40
   1  13   0   22.10   10.90
   1  13   0    7.00    5.30
  -2 -13   0  768.02   52.69
  -2 -13   0  690.83   57.09
  -2 -13   0  720.03   52.99
  -2 -13   0  760.42   56.09
  -2 -13   0  786.12   58.19
  -2 -13   0  789.42   58.59
  -2 -13   0  730.53   55.09
  -2 -13   0  700.53   56.19
   2  13   0  726.33   55.69
   2  13   0  708.43   56.79
   2  13   0  737.83   56.69
   2  13   0  804.62   57.09
   2  13   0  789.52   55.89
   2  13   0  760.52   59.49
   2  13   0  674.13   63.99
   2  13   0  794.72   58.19
  -3 -13   0    4.50    3.30
  -3 -13   0    8.90    5.50
  -3 -13   0   -1.40    2.80
  -3 -13   0    7.50    6.90
  -3 -13   0    4.70    5.40
  -3 -13   0    4.90    5.20
  -3 -13   0   -3.50    4.60
   3  13   0    0.90    4.80
   3  13   0    0.10    4.30
   3  13   0   -1.50    4.40
   3  13   0   11.10    6.70
   3  13   0    5.00    4.60
   3  13   0   -2.20    6.50
   3  13   0    0.00    4.70
  -4 -13   0  229.28   24.60
  -4 -13   0  205.48   22.00
  -4 -13   0  212.48   20.10
  -4 -13   0  252.07   22.80
  -4 -13   0  226.88   23.50
  -4 -13   0  233.18   28.00
  -4 -13   0  234.08   19.40
   4  13   0  205.48   32.50
   4  13   0  251.17   28.30
   4  13   0  241.68   22.50
   4  13   0  238.78   16.70
   4  13   0  195.38   22.80
   4  13   0  225.98   23.50
   4  13   0  205.48   21.00
   4  13   0  220.68   25.70
  -5 -13   0  273.17   23.50
  -5 -13   0  228.08   29.10
  -5 -13   0  341.67   36.30
  -5 -13   0  254.37   21.30
  -5 -13   0  255.47   22.50
  -5 -13   0  264.97   24.80
  -5 -13   0  268.87   26.30
  -5 -13   0  266.27   24.90
  -5 -13   0  244.18   23.30
   5  13   0  277.27   26.10
   5  13   0  209.98   24.10
   5  13   0  270.47   37.70
   5  13   0  262.67   23.90
   5  13   0  235.58   23.50
   5  13   0  229.48   28.20
   5  13   0  230.28   23.00
  -6 -13   0    2.00    9.10
  -6 -13   0    7.80    5.70
  -6 -13   0   -5.40    4.80
  -6 -13   0   -1.30    3.60
  -6 -13   0    4.70    3.80
  -6 -13   0    3.00    3.90
  -6 -13   0   -1.60    3.50
  -6 -13   0   -2.60    5.10
   6  13   0    0.90    3.70
   6  13   0    3.40    4.80
   6  13   0    0.20    3.80
   6  13   0   -0.40    7.70
   6  13   0   -2.30    4.60
   6  13   0   -2.60    3.70
   6  13   0   -3.10    2.90
  -7 -13   0  196.58   19.60
  -7 -13   0  129.89   23.10
  -7 -13   0  179.68   20.20
  -7 -13   0  172.58   30.10
  -7 -13   0  222.58   27.20
  -7 -13   0  206.78   29.70
   7  13   0  205.18   25.60
   7  13   0  166.28   22.90
   7  13   0  198.48   27.40
   7  13   0  164.48   20.90
   7  13   0  195.68   19.60
   7  13   0  136.29   27.10
   7  13   0  156.58   18.60
  -8 -13   0   16.90    9.20
  -8 -13   0    8.60   10.50
  -8 -13   0    5.40    7.30
  -8 -13   0    4.40    4.90
   8  13   0    7.40    6.20
   8  13   0   16.20    5.30
   8  13   0    6.50    5.20
   8  13   0    3.50    4.50
  -9 -13   0  315.27   27.40
  -9 -13   0  239.28   34.30
  -9 -13   0  261.77   34.30
   9  13   0  285.97   33.40
   9  13   0  272.07   26.50
   9  13   0  289.67   24.00
 -10 -13   0  207.78   31.90
 -10 -13   0  219.68   25.20
 -10 -13   0  147.79   27.00
  10  13   0  231.38   26.30
  10  13   0  201.58   27.30
 -11 -13   0    2.30    5.90
 -11 -13   0    7.60   10.60
 -11 -13   0    0.70    8.80
  11  13   0    4.80    5.80
  11  13   0    3.90    7.20
 -12 -13   0  231.78   38.20
 -12 -13   0  195.18   33.90
 -12 -13   0  241.18   29.80
  12  13   0  271.07   27.90
  12  13   0  268.77   33.80
  12  13   0  304.87   30.60
 -13 -13   0   -0.80    6.70
 -13 -13   0   11.00   12.30
 -13 -13   0    4.30   10.40
  13  13   0    0.80    7.10
  13  13   0   16.70   10.10
  13  13   0    7.60    7.30
 -14 -13   0  119.09   27.50
 -14 -13   0   81.39   24.90
 -14 -13   0  127.69   21.80
  14  13   0  152.18   25.50
 -15 -13   0   80.39   24.70
 -15 -13   0  116.69   30.20
 -15 -13   0  125.19   22.50
  15  13   0  188.28   28.10
  -7  14   0  152.18   27.10
  -7  14   0  122.99   25.60
  -7  14   0  176.88   30.30
  -6  14   0  205.18   31.00
  -6  14   0  188.28   29.30
  -6  14   0  191.18   29.80
  -5  14   0   10.00    8.80
  -5  14   0   -1.20    6.70
  -5  14   0   -2.00    7.80
   4 -14   0  134.09   19.80
  -4  14   0  120.69   23.10
  -4  14   0  150.28   24.90
  -4  14   0  189.18   23.10
  -4  14   0  162.78   24.30
   3 -14   0   11.30    6.60
   3 -14   0    3.30    4.10
   3 -14   0    0.50    7.10
  -3  14   0    4.10    7.20
  -3  14   0    8.90    7.40
  -3  14   0   -4.40    5.20
  -3  14   0    8.00    6.00
   2 -14   0   84.19   13.10
   2 -14   0   85.79   17.30
   2 -14   0  103.49   16.00
  -2  14   0   64.79   14.70
  -2  14   0   51.19   17.70
  -2  14   0  113.29   20.20
  -2  14   0   92.99   15.30
  -2  14   0  100.79   17.00
   1 -14   0   33.70   10.90
   1 -14   0   53.99   11.20
   1 -14   0   41.40   10.30
  -1  14   0   50.09   12.90
  -1  14   0   24.60    9.00
  -1  14   0   41.60   12.00
  -1  14   0   56.09   17.90
  -1  14   0   61.89   11.30
   0 -14   0   69.49    6.20
   0 -14   0   73.19   15.10
   0 -14   0   63.09   12.90
   0 -14   0   63.59    8.70
   0 -14   0   67.09    5.90
   0 -14   0   77.29   13.60
   0  14   0   54.39   12.30
   0  14   0   66.69   12.90
   0  14   0   82.89   13.20
   0  14   0   80.59   15.50
   0  14   0   39.50   15.80
   0  14   0   50.49   13.40
  -1 -14   0  520.35   41.80
  -1 -14   0  501.25   42.90
  -1 -14   0  463.05   41.10
  -1 -14   0  478.45   36.60
  -1 -14   0  510.85   35.70
  -1 -14   0  458.05   37.80
   1  14   0  517.45   40.10
   1  14   0  487.75   43.80
   1  14   0  511.55   39.20
   1  14   0  458.65   40.60
   1  14   0  483.85   55.99
   1  14   0  534.75   45.60
   1  14   0  505.25   42.20
   1  14   0  494.85   40.30
  -2 -14   0  174.38   15.10
  -2 -14   0  154.78   19.20
  -2 -14   0  162.48   21.80
  -2 -14   0  160.18   21.90
  -2 -14   0  129.49   19.90
  -2 -14   0  160.38   19.80
  -2 -14   0  140.29   17.30
  -2 -14   0  158.78   20.00
   2  14   0  164.38   21.10
   2  14   0  142.79   27.50
   2  14   0  164.78   23.50
   2  14   0  159.18   19.30
   2  14   0  140.69   20.40
   2  14   0  169.78   21.80
   2  14   0  163.88   17.60
  -3 -14   0   17.80    6.80
  -3 -14   0   36.80    7.50
  -3 -14   0   17.60    7.50
  -3 -14   0   23.80    8.90
  -3 -14   0   26.20    7.80
  -3 -14   0   15.70    5.30
  -3 -14   0   15.60    8.10
  -3 -14   0   28.20    8.70
   3  14   0   26.50    8.10
   3  14   0   33.20   10.60
   3  14   0   34.70    9.50
   3  14   0   25.20    7.50
   3  14   0    7.80    6.30
   3  14   0   27.10   12.30
   3  14   0   18.90    8.20
  -4 -14   0  206.68   23.60
  -4 -14   0  191.68   19.30
  -4 -14   0  195.28   26.40
  -4 -14   0  206.38   25.40
  -4 -14   0  262.67   24.60
  -4 -14   0  238.88   22.90
  -4 -14   0  256.17   26.20
   4  14   0  200.58   21.50
   4  14   0  227.68   26.60
   4  14   0  194.98   22.80
   4  14   0  182.48   23.00
   4  14   0  240.98   22.20
   4  14   0  189.58   32.40
   4  14   0  246.48   28.90
  -5 -14   0   -5.80    4.80
  -5 -14   0   -4.60    2.60
  -5 -14   0   -0.20    5.10
  -5 -14   0    4.00    6.30
  -5 -14   0   -3.50    4.00
   5  14   0   -5.50    2.90
   5  14   0   -3.50    3.30
   5  14   0    1.70    4.60
   5  14   0    0.00    7.60
   5  14   0    6.80    5.20
   5  14   0    2.20    5.00
   5  14   0   -1.10    4.00
  -6 -14   0  124.79   20.60
  -6 -14   0  132.79   17.80
  -6 -14   0  155.48   18.10
  -6 -14   0  183.58   21.50
  -6 -14   0  128.89   21.50
   6  14   0  162.48   20.20
   6  14   0  157.28   19.90
   6  14   0  170.08   29.70
   6  14   0  149.59   22.20
   6  14   0  142.49   18.10
  -7 -14   0   10.40    8.30
  -7 -14   0   13.20    8.60
  -7 -14   0    9.20    5.50
   7  14   0    8.90    5.70
   7  14   0    6.50    4.70
   7  14   0    1.90    6.20
   7  14   0   14.90    6.60
  -8 -14   0  444.26   46.00
  -8 -14   0  537.15   41.70
  -8 -14   0  475.65   45.40
   8  14   0  503.95   42.40
   8  14   0  527.55   40.00
   8  14   0  564.14   43.00
   8  14   0  505.85   45.30
  -9 -14   0   77.49   14.20
  -9 -14   0   88.09   19.60
  -9 -14   0   83.29   19.70
   9  14   0  111.29   13.80
   9  14   0   91.99   15.60
   9  14   0  107.39   19.20
 -10 -14   0    2.90    8.30
 -10 -14   0   -2.60    4.40
 -10 -14   0    6.50    8.90
  10  14   0   -1.50    4.40
  10  14   0    1.80    6.80
  10  14   0   -0.10    3.50
 -11 -14   0  153.08   28.20
 -11 -14   0  128.89   20.70
 -11 -14   0  158.28   29.50
  11  14   0  196.88   24.40
  11  14   0  197.38   27.10
 -12 -14   0    3.40   11.10
 -12 -14   0   10.40    7.90
 -12 -14   0    4.00   11.00
  12  14   0   20.50   10.50
  12  14   0   10.90    7.60
 -13 -14   0   46.20   17.90
 -13 -14   0   55.59   19.30
 -13 -14   0   47.00   13.60
  13  14   0   67.49   14.90
  13  14   0   72.59   16.50
  13  14   0   26.20   12.30
 -14 -14   0   73.19   22.60
 -14 -14   0   54.79   15.10
 -14 -14   0   27.40   17.20
  14  14   0   33.70   13.80
  14  14   0   46.90   13.10
  -6  15   0    9.00    9.90
  -6  15   0    4.80    8.50
  -6  15   0    5.40    9.90
  -5  15   0  166.48   28.70
  -5  15   0  148.09   26.80
  -5  15   0  227.78   30.10
  -4  15   0   35.30   13.70
  -4  15   0   33.20   13.80
  -4  15   0   35.80   12.40
   3 -15   0  146.79   20.70
  -3  15   0  129.19   22.80
  -3  15   0  142.89   24.70
  -3  15   0  149.39   22.70
  -3  15   0  153.58   21.00
   2 -15   0  161.08   23.20
   2 -15   0  201.38   29.30
   2 -15   0  198.18   19.20
  -2  15   0  216.48   27.20
  -2  15   0  187.08   28.10
  -2  15   0  212.48   27.50
   1 -15   0   13.00    7.00
   1 -15   0   14.90    7.80
   1 -15   0   33.20   11.40
  -1  15   0   21.30    9.00
  -1  15   0   24.60    9.10
  -1  15   0   15.70    9.30
   0 -15   0  171.78   25.20
   0 -15   0  159.78   21.50
   0 -15   0  202.68   24.80
   0  15   0  166.08   23.60
   0  15   0  196.28   23.50
   0  15   0  146.49   24.40
  -1 -15   0  242.48   18.10
  -1 -15   0  240.98   18.60
  -1 -15   0  217.48   20.30
  -1 -15   0  213.98   28.40
  -1 -15   0  253.87   25.20
  -1 -15   0  290.17   30.00
   1  15   0  164.38   32.60
   1  15   0  248.38   24.30
   1  15   0  235.18   27.80
   1  15   0  204.68   28.90
   1  15   0  251.27   32.40
  -2 -15   0    1.90    5.30
  -2 -15   0    8.90    7.30
  -2 -15   0   16.20    5.90
  -2 -15   0   15.30    4.60
  -2 -15   0   13.00    6.40
   2  15   0   17.70    8.40
   2  15   0   10.30    7.70
   2  15   0    9.50    6.10
   2  15   0   11.70    6.60
   2  15   0   25.90   13.50
  -3 -15   0  187.58   25.30
  -3 -15   0  182.88   22.60
  -3 -15   0  201.48   25.00
  -3 -15   0  197.38   21.30
  -3 -15   0  188.18   17.50
  -3 -15   0  172.78   22.50
   3  15   0  244.98   36.60
   3  15   0  215.78   24.50
   3  15   0  207.78   24.50
   3  15   0  194.98   20.60
   3  15   0  173.88   25.60
  -4 -15   0   15.90    7.50
  -4 -15   0   20.20    9.00
  -4 -15   0    7.70    7.00
  -4 -15   0   -1.10    5.40
  -4 -15   0   13.10    5.20
  -4 -15   0    6.90    7.10
   4  15   0    5.30    5.80
   4  15   0   10.20    5.70
   4  15   0    7.70    6.30
   4  15   0    7.10    5.50
  -5 -15   0   48.90   13.40
  -5 -15   0   57.59   11.90
  -5 -15   0   34.70    8.40
  -5 -15   0   44.90   11.00
  -5 -15   0   67.29   14.60
  -5 -15   0   35.70   11.30
   5  15   0   42.40   12.40
   5  15   0   68.49   12.10
   5  15   0   39.80   10.40
   5  15   0   47.20   11.00
  -6 -15   0   82.89   16.60
  -6 -15   0   66.89   16.00
  -6 -15   0   69.89   12.80
  -6 -15   0   62.89   11.40
   6  15   0   82.49   14.40
   6  15   0   79.69   13.00
   6  15   0   81.09   14.20
   6  15   0   58.89   14.70
  -7 -15   0  206.98   28.50
  -7 -15   0  203.78   23.20
  -7 -15   0  223.28   30.40
   7  15   0  206.48   28.30
   7  15   0  221.88   23.10
   7  15   0  207.08   22.70
   7  15   0  242.38   24.50
  -8 -15   0  258.77   34.40
  -8 -15   0  286.67   27.50
  -8 -15   0  305.47   38.20
   8  15   0  325.57   29.30
   8  15   0  295.57   26.60
   8  15   0  312.17   29.40
   8  15   0  343.07   37.30
  -9 -15   0   99.39   15.50
  -9 -15   0  108.29   21.50
  -9 -15   0  108.49   22.00
   9  15   0   73.49   17.30
   9  15   0   92.29   16.20
   9  15   0   94.09   13.80
 -10 -15   0  269.87   36.30
 -10 -15   0  276.57   38.70
 -10 -15   0  256.47   29.40
  10  15   0  312.27   25.50
  10  15   0  271.87   28.20
  10  15   0  303.17   36.30
 -11 -15   0   28.40   14.10
 -11 -15   0   39.60   15.20
 -11 -15   0   18.30    9.10
  11  15   0   40.00   13.30
  11  15   0   27.00    9.20
 -12 -15   0   34.70   16.20
 -12 -15   0    8.00    8.10
 -12 -15   0   18.70   13.70
  12  15   0   20.80    9.50
  12  15   0   25.70   12.50
 -13 -15   0   82.59   23.20
 -13 -15   0   78.99   23.00
 -13 -15   0   72.09   16.70
  13  15   0  124.99   20.80
  13  15   0  110.09   21.70
  13  15   0  152.28   23.70
 -14 -15   0   -0.20   11.60
 -14 -15   0   11.40   14.50
 -14 -15   0    8.10   10.10
  14  15   0    9.40   10.80
  14  15   0   15.20   10.00
  -5  16   0   98.69   21.90
  -5  16   0  103.79   23.00
  -5  16   0   73.59   18.50
  -4  16   0   17.10   10.10
  -4  16   0    4.90    9.30
  -4  16   0    4.10    8.80
  -3  16   0  122.79   21.70
  -3  16   0  117.79   22.40
  -3  16   0  126.09   23.70
   2 -16   0   -5.40    6.30
  -2  16   0    9.10    8.30
  -2  16   0    5.40    7.70
  -2  16   0   14.90    8.90
   1 -16   0   74.89   16.20
   1 -16   0  113.39   15.50
   1 -16   0   92.39   19.70
  -1  16   0  100.19   18.10
  -1  16   0   71.39   17.70
  -1  16   0  113.99   20.00
   0 -16   0   59.79   15.60
   0 -16   0   74.99   15.00
   0 -16   0   59.39   12.60
   0  16   0   59.19   13.60
   0  16   0   86.09   16.20
   0  16   0   57.09   15.80
  -1 -16   0   91.09   17.50
  -1 -16   0   79.29   15.40
  -1 -16   0   42.10   12.50
   1  16   0   66.89   14.00
   1  16   0   82.69   17.90
   1  16   0   56.79   13.20
  -2 -16   0  383.56   29.10
  -2 -16   0  420.46   38.40
  -2 -16   0  381.06   32.80
  -2 -16   0  370.76   29.80
  -2 -16   0  364.06   35.90
   2  16   0  443.06   40.30
   2  16   0  441.96   36.10
   2  16   0  421.96   36.70
  -3 -16   0   15.50    5.10
  -3 -16   0   12.50    8.20
  -3 -16   0   13.50    8.60
  -3 -16   0   14.00    6.70
  -3 -16   0   10.00    7.00
   3  16   0   32.10   10.10
   3  16   0   21.40    7.90
   3  16   0   50.79   13.60
   3  16   0   28.60    9.60
  -4 -16   0   47.30    8.80
  -4 -16   0   56.49   13.30
  -4 -16   0   49.60   11.90
  -4 -16   0   52.29   13.60
  -4 -16   0   55.49   11.20
  -4 -16   0   46.60   12.10
   4  16   0   47.80   11.30
   4  16   0   60.99   12.40
   4  16   0   76.29   16.30
   4  16   0   55.79   12.30
  -5 -16   0   25.60   10.40
  -5 -16   0   20.20    8.80
  -5 -16   0   30.80   10.70
  -5 -16   0   20.00    8.70
  -5 -16   0   30.20   11.70
  -5 -16   0   20.90    6.70
   5  16   0   27.00    9.20
   5  16   0   33.00    9.80
   5  16   0   29.60    8.90
   5  16   0   36.80   11.90
  -6 -16   0   50.09   11.20
  -6 -16   0   76.39   15.40
  -6 -16   0   66.79   11.40
  -6 -16   0   59.99   15.60
   6  16   0   61.19   12.80
   6  16   0   36.70    9.80
   6  16   0   42.10   12.80
   6  16   0   59.69   13.00
  -7 -16   0  170.98   27.20
  -7 -16   0  152.68   19.60
  -7 -16   0  175.68   25.90
   7  16   0  219.38   25.40
   7  16   0  173.78   21.00
   7  16   0  150.88   22.00
   7  16   0  192.18   26.70
  -8 -16   0    1.50    4.80
  -8 -16   0   -2.20    7.70
  -8 -16   0    1.70    7.60
   8  16   0    0.40    5.70
   8  16   0    3.50    5.70
   8  16   0   -1.20    3.70
   8  16   0    0.60    5.30
  -9 -16   0   95.69   20.20
  -9 -16   0   94.29   15.60
  -9 -16   0  116.19   23.10
   9  16   0  124.39   16.00
   9  16   0  120.89   19.00
   9  16   0  109.99   18.20
   9  16   0  129.89   22.70
 -10 -16   0  335.47   43.20
 -10 -16   0  287.47   38.90
 -10 -16   0  303.77   32.60
  10  16   0  334.77   27.90
  10  16   0  281.47   37.30
  10  16   0  319.97   31.30
 -11 -16   0   38.90   11.70
 -11 -16   0   49.30   17.30
 -11 -16   0   51.89   19.10
  11  16   0   54.39   13.50
  11  16   0   21.60   11.10
 -12 -16   0  185.78   34.40
 -12 -16   0  129.79   27.80
 -12 -16   0  171.18   23.90
  12  16   0  158.78   26.90
  12  16   0  176.98   24.90
 -13 -16   0    9.90    8.90
 -13 -16   0   -4.00    9.50
 -13 -16   0   -2.20   12.10
  13  16   0   24.50   11.40
  13  16   0    6.50    9.90
  13  16   0    8.50    9.90
  -4  17   0  231.58   30.80
  -4  17   0  173.48   28.70
  -4  17   0  124.09   26.70
  -3  17   0   54.39   14.80
  -3  17   0   84.49   18.60
  -3  17   0   39.80   15.80
   2 -17   0  132.09   24.20
  -2  17   0  104.89   21.10
  -2  17   0  150.18   22.90
  -2  17   0  103.29   22.70
   1 -17   0  147.09   14.90
   1 -17   0   93.69   18.80
  -1  17   0  144.29   22.10
  -1  17   0  131.19   22.60
  -1  17   0  114.09   23.30
   0 -17   0    7.50    6.80
   0 -17   0    6.00    8.20
   0 -17   0    7.50    8.00
   0  17   0   -4.10    5.30
   0  17   0    2.30    6.50
   0  17   0   -0.50    6.50
  -1 -17   0  200.88   29.20
  -1 -17   0  230.18   27.00
   1  17   0  157.78   28.00
   1  17   0  228.88   28.00
   1  17   0  248.38   29.90
  -2 -17   0   77.29   17.20
  -2 -17   0   48.80   12.80
   2  17   0   27.20   11.80
   2  17   0   60.99   13.70
   2  17   0   55.49   12.90
  -3 -17   0   63.29   14.60
  -3 -17   0   45.60    7.40
  -3 -17   0   44.00    8.60
  -3 -17   0   62.39   14.60
   3  17   0   64.89   13.80
   3  17   0   35.90   12.80
   3  17   0   55.79   13.60
  -4 -17   0  149.79   23.00
  -4 -17   0  155.78   19.40
  -4 -17   0  199.58   27.20
  -4 -17   0  193.78   22.80
  -4 -17   0  186.18   16.90
   4  17   0  123.39   20.40
   4  17   0  174.28   23.10
   4  17   0  186.78   24.40
   4  17   0  167.48   26.80
  -5 -17   0   27.80   10.60
  -5 -17   0   25.10   10.90
  -5 -17   0   29.10    9.40
  -5 -17   0   28.60    7.40
  -5 -17   0   36.80   11.60
  -5 -17   0   17.00    9.00
   5  17   0   35.10   11.00
   5  17   0   49.30   14.00
   5  17   0   44.30   11.00
   5  17   0   33.30    9.80
  -6 -17   0  164.48   23.10
  -6 -17   0  175.68   23.00
  -6 -17   0  140.29   17.70
  -6 -17   0  124.09   20.70
  -6 -17   0  137.39   23.90
   6  17   0  153.58   21.50
   6  17   0  113.79   21.50
   6  17   0  152.98   19.70
   6  17   0  131.79   20.40
  -7 -17   0   46.40   10.00
  -7 -17   0   36.20   12.90
  -7 -17   0   47.80   14.80
   7  17   0   46.60   11.90
   7  17   0   44.20   10.40
   7  17   0   55.89   12.90
   7  17   0   24.80   11.20
  -8 -17   0   36.00    9.40
  -8 -17   0   30.20   13.40
  -8 -17   0   36.90   14.00
   8  17   0   31.60   10.60
   8  17   0   29.30   11.70
   8  17   0   38.00   11.40
   8  17   0   48.50   11.00
  -9 -17   0  178.58   21.50
  -9 -17   0  136.39   25.90
  -9 -17   0  119.19   23.60
   9  17   0  175.98   19.90
   9  17   0  181.88   27.50
   9  17   0  138.79   21.40
   9  17   0  150.38   22.20
 -10 -17   0    7.10   10.50
 -10 -17   0    9.30   11.50
 -10 -17   0    2.80    6.50
  10  17   0   -4.00    5.40
  10  17   0    1.60    6.20
  10  17   0    0.50    4.50
 -11 -17   0  217.88   26.60
 -11 -17   0  184.68   31.90
 -11 -17   0  243.98   37.00
  11  17   0  206.78   27.90
  11  17   0  206.58   31.10
  11  17   0  203.08   22.40
 -12 -17   0   -9.80    9.70
 -12 -17   0   -0.70   10.80
 -12 -17   0   -5.70    6.20
  12  17   0    1.50    8.50
  12  17   0   -0.70    6.90
 -13 -17   0   54.19   20.00
 -13 -17   0   35.80   18.50
 -13 -17   0   90.09   17.30
  13  17   0   62.79   15.70
  13  17   0   22.30   12.70
  -3  18   0   57.59   19.30
  -3  18   0   77.39   19.00
  -3  18   0   82.99   19.10
  -2  18   0  142.59   25.40
  -2  18   0  150.98   24.40
  -2  18   0  136.09   27.10
   1 -18   0   78.39   17.10
  -1  18   0   50.29   13.70
  -1  18   0   49.60   15.30
  -1  18   0   59.59   17.60
   0 -18   0   94.89   14.30
   0  18   0   73.29   17.90
   0  18   0  138.79   21.60
   0  18   0  110.69   22.10
  -1 -18   0   58.69   13.30
   1  18   0   93.49   17.30
   1  18   0   54.19   14.20
   1  18   0   92.79   20.30
  -2 -18   0  113.89   19.00
  -2 -18   0   51.79   15.40
   2  18   0   96.19   17.30
   2  18   0   97.69   18.30
   2  18   0   80.39   19.50
  -3 -18   0  219.88   15.50
  -3 -18   0  208.18   15.60
  -3 -18   0  232.88   30.50
  -3 -18   0  252.07   30.50
   3  18   0  233.18   30.30
   3  18   0  240.68   33.10
   3  18   0  203.88   26.60
  -4 -18   0    1.30    3.90
  -4 -18   0    5.90    5.60
  -4 -18   0    7.40    8.70
  -4 -18   0    5.40    8.50
   4  18   0   14.70    8.70
   4  18   0   25.70    9.40
   4  18   0   21.60    7.80
  -5 -18   0  101.09   13.10
  -5 -18   0   66.99   17.50
  -5 -18   0   83.99   16.10
  -5 -18   0   92.09   14.80
  -5 -18   0   94.09   17.70
   5  18   0  104.29   17.40
   5  18   0  135.49   23.90
   5  18   0  103.69   18.50
   5  18   0   97.29   17.50
  -6 -18   0   53.29   15.10
  -6 -18   0   60.79   14.50
  -6 -18   0   45.70    9.30
   6  18   0   68.39   17.00
   6  18   0   67.49   14.90
   6  18   0   66.89   14.20
   6  18   0   44.00   11.50
  -7 -18   0   12.30    6.60
  -7 -18   0    5.10    8.60
  -7 -18   0   24.50   12.30
  -7 -18   0   19.60   11.60
   7  18   0    6.40    7.10
   7  18   0   16.70   10.20
   7  18   0   20.80    8.20
   7  18   0    7.10    7.50
  -8 -18   0  174.58   27.10
  -8 -18   0  180.38   29.50
  -8 -18   0  149.19   20.30
   8  18   0  166.88   24.30
   8  18   0  167.48   27.80
   8  18   0  170.78   21.80
   8  18   0  193.58   26.10
  -9 -18   0    3.80   10.40
  -9 -18   0    2.10    5.90
  -9 -18   0    0.60    9.80
   9  18   0    1.40    6.60
   9  18   0    5.20    6.80
   9  18   0   11.10   10.30
   9  18   0   -0.10    5.00
 -10 -18   0  174.98   30.10
 -10 -18   0  189.08   33.20
 -10 -18   0  208.78   25.30
  10  18   0  215.78   28.40
  10  18   0  229.48   23.90
  10  18   0  220.38   31.80
 -11 -18   0   59.99   13.80
 -11 -18   0   81.49   23.70
 -11 -18   0   60.49   19.50
  11  18   0   61.79   12.00
  11  18   0   69.39   18.40
  11  18   0   88.09   17.60
 -12 -18   0   55.89   13.70
 -12 -18   0   40.40   16.90
 -12 -18   0   61.49   21.70
  12  18   0   46.60   16.20
  12  18   0   38.30   13.10
  -1  19   0   61.49   18.60
  -1  19   0   76.59   17.40
  -1  19   0   64.99   17.60
   0  19   0   10.70   10.80
   0  19   0    5.40    8.00
   0  19   0    5.60    7.40
  -1 -19   0   15.40    7.80
   1  19   0   15.90    9.30
   1  19   0   17.20   11.60
   1  19   0   26.80   11.60
  -2 -19   0   68.99   14.50
   2  19   0   86.29   17.80
   2  19   0   51.39   13.90
   2  19   0   71.69   18.20
  -3 -19   0    4.00    8.40
  -3 -19   0    2.50    9.40
   3  19   0    6.00    7.40
   3  19   0   -2.20    7.10
   3  19   0    8.60    7.50
  -4 -19   0  276.97   34.20
  -4 -19   0  248.18   18.70
  -4 -19   0  252.17   18.90
  -4 -19   0  252.47   32.80
   4  19   0  310.27   34.90
   4  19   0  287.37   38.20
   4  19   0  271.47   28.60
  -5 -19   0  130.89   14.50
  -5 -19   0  160.48   26.30
  -5 -19   0  116.79   16.00
   5  19   0  135.69   22.10
   5  19   0  176.18   28.80
   5  19   0  153.68   22.90
  -6 -19   0    0.70    4.60
  -6 -19   0   -0.80    8.30
   6  19   0   -0.40    5.80
   6  19   0    6.20    6.70
   6  19   0   11.60   10.00
   6  19   0    6.70    7.10
  -7 -19   0  223.68   24.10
  -7 -19   0  216.78   30.20
  -7 -19   0  241.38   34.40
   7  19   0  247.88   31.10
   7  19   0  293.47   37.50
   7  19   0  216.78   29.40
   7  19   0  249.97   28.50
  -8 -19   0    5.50    9.80
  -8 -19   0    6.60    9.50
  -8 -19   0    6.60    6.30
   8  19   0    8.10    7.80
   8  19   0   13.60    9.40
   8  19   0    6.30    6.90
   8  19   0   -4.70    5.00
  -9 -19   0   61.59   17.50
  -9 -19   0   62.49   13.10
  -9 -19   0   83.89   22.20
   9  19   0   50.49   14.10
   9  19   0   69.19   15.40
   9  19   0   88.69   21.00
   9  19   0   75.69   13.60
 -10 -19   0   57.19   17.50
 -10 -19   0   68.59   21.10
 -10 -19   0   70.69   14.80
  10  19   0   99.49   18.50
  10  19   0   81.59   20.60
  10  19   0   84.19   14.20
 -11 -19   0   17.30    9.20
 -11 -19   0    9.10   14.20
 -11 -19   0    5.40   12.30
  11  19   0   17.20    9.10
  11  19   0   28.40   13.40
  11  19   0   19.10    7.40
   1  20   0   62.69   16.40
   1  20   0   37.30   15.50
   1  20   0   60.89   15.30
  -2 -20   0   21.70    9.60
   2  20   0   29.40   11.10
   2  20   0    9.60    9.50
   2  20   0   31.10   13.90
  -3 -20   0   17.90   10.20
   3  20   0   16.60    8.70
   3  20   0   13.80   11.90
   3  20   0   10.90    8.80
  -4 -20   0   43.90   13.80
   4  20   0   45.00   15.70
   4  20   0   48.00   12.90
   4  20   0   42.60   14.10
  -5 -20   0   33.10   13.70
  -5 -20   0   12.80    3.30
  -5 -20   0   15.10    2.90
   5  20   0   15.20    9.40
   5  20   0   24.50   10.70
   5  20   0   14.00   12.20
  -6 -20   0  279.87   36.30
  -6 -20   0  279.67   22.50
  -6 -20   0  235.18   23.50
   6  20   0  246.28   32.50
   6  20   0  248.28   37.30
  -7 -20   0   59.69   10.70
  -7 -20   0   61.89   18.20
   7  20   0   77.09   17.10
   7  20   0   66.09   14.50
   7  20   0   70.69   16.80
   7  20   0   71.79   19.50
  -8 -20   0   24.80    7.80
  -8 -20   0   14.20   13.00
   8  20   0   37.70   10.70
   8  20   0   25.10   10.60
   8  20   0   17.90   12.10
   8  20   0   40.00   13.20
  -9 -20   0  119.69   17.10
  -9 -20   0   93.19   24.10
   9  20   0  116.99   18.00
   9  20   0   95.19   23.00
   9  20   0  112.49   20.60
   9  20   0  115.89   21.20
 -10 -20   0    6.60    7.30
 -10 -20   0  -13.40   10.40
  10  20   0    8.70    8.30
  10  20   0   -5.10    8.00
  10  20   0    1.00    5.70
  -4 -21   0  -13.80    8.30
   4  21   0    4.40    7.30
   4  21   0   13.60    9.40
   4  21   0   24.30   13.70
  -5 -21   0  150.98   25.20
   5  21   0  154.08   25.30
   5  21   0  103.99   25.10
   5  21   0  177.38   26.90
  -6 -21   0  127.79   24.90
   6  21   0  141.79   23.80
   6  21   0  158.18   25.20
   6  21   0  188.78   32.10
  -7 -21   0   -4.00    6.70
  -7 -21   0    0.70   11.40
  -7 -21   0    3.30    4.80
   7  21   0    7.80    8.30
   7  21   0   16.80   10.10
   7  21   0   14.90   11.60
   6  21  -1   39.00   12.70
   6  21  -1   43.90   13.00
  -6 -21   1   45.40   16.60
  -6 -21   1   27.50    7.70
   5  21  -1   14.80   10.10
   5  21  -1   19.60   12.40
   5  21  -1   14.20    9.40
  -5 -21   1    2.50    3.60
  -5 -21   1    4.30   10.70
  -5 -21   1    2.70    4.40
   4  21  -1  147.29   24.50
   9  20  -1   24.50    9.30
   9  20  -1   34.10   12.10
   9  20  -1   27.40   14.60
   9  20  -1   35.90   12.20
  -9 -20   1   31.50   10.60
  -9 -20   1   27.50   15.30
  -9 -20   1   35.20   16.80
   8  20  -1   50.09   17.30
   8  20  -1   49.30   14.80
   8  20  -1   61.89   15.30
   8  20  -1   79.39   14.30
  -8 -20   1   80.39   20.80
  -8 -20   1   60.69   22.10
  -8 -20   1   60.39   12.30
   7  20  -1  127.59   19.60
   7  20  -1  123.89   21.90
   7  20  -1  134.19   26.60
   7  20  -1  130.89   22.60
  -7 -20   1  108.79   16.30
  -7 -20   1  117.89   25.40
   6  20  -1   10.00    8.00
   6  20  -1   28.10   12.40
   6  20  -1   -8.00    5.80
   6  20  -1   10.20    7.80
  -6 -20   1   -6.70    4.30
  -6 -20   1    3.60   10.00
   5  20  -1  145.29   29.00
   5  20  -1  191.28   28.40
   5  20  -1  212.78   28.80
  -5 -20   1  208.48   19.30
  -5 -20   1  237.88   33.10
   4  20  -1   24.30   11.10
   4  20  -1   17.30   11.50
   4  20  -1   26.60   10.90
  -4 -20   1   30.90    6.70
  -4 -20   1   16.00    4.90
  -4 -20   1   34.50   13.70
   3  20  -1  109.49   19.90
   3  20  -1   67.69   18.80
   3  20  -1  112.69   20.80
  -3 -20   1  132.89   22.50
   2  20  -1   53.39   14.80
   2  20  -1   51.79   16.00
   2  20  -1   12.50   10.50
  -2 -20   1   51.79   14.20
   1  20  -1    1.40    7.80
   1  20  -1   12.70   11.20
   1  20  -1    4.10    7.10
  -1 -20   1    2.70    7.60
  11  19  -1  177.18   19.50
 -11 -19   1   99.39   25.20
 -11 -19   1  140.79   21.50
  10  19  -1   39.70   12.80
  10  19  -1   72.29   19.70
  10  19  -1   61.29   11.70
 -10 -19   1   86.69   23.80
 -10 -19   1   39.30   11.80
 -10 -19   1   30.40   15.20
   9  19  -1    9.70    8.40
   9  19  -1    5.60    6.90
   9  19  -1   -1.00    5.30
   9  19  -1    6.40    8.60
  -9 -19   1    7.10   11.40
  -9 -19   1    9.10    7.60
  -9 -19   1   14.00   12.10
   8  19  -1   71.19   13.90
   8  19  -1   66.29   15.30
   8  19  -1   69.79   17.90
   8  19  -1   77.19   16.70
  -8 -19   1   47.70   12.00
  -8 -19   1   74.89   20.80
  -8 -19   1   47.50   16.00
   7  19  -1    3.70    9.30
   7  19  -1   13.00    8.10
   7  19  -1   20.10    9.50
   7  19  -1   23.10    9.30
  -7 -19   1    7.50    6.30
  -7 -19   1   19.30   11.50
  -7 -19   1   38.30   15.50
   6  19  -1   19.10    9.60
   6  19  -1   19.60    9.80
   6  19  -1   28.20   13.00
   6  19  -1   20.10    9.30
  -6 -19   1   21.70    7.60
  -6 -19   1   31.60   15.00
  -6 -19   1   21.90   11.50
   5  19  -1   44.90   13.40
   5  19  -1   79.99   15.10
   5  19  -1   56.09   13.80
   5  19  -1   46.40   15.80
  -5 -19   1   54.09   16.80
  -5 -19   1   42.30    9.30
   4  19  -1   50.49   15.80
   4  19  -1   63.39   17.10
   4  19  -1   62.19   15.30
   4  19  -1   91.49   17.10
  -4 -19   1   83.19   11.50
  -4 -19   1   53.29   16.80
  -4 -19   1   64.09   12.30
   3  19  -1  156.88   25.30
   3  19  -1  171.48   25.40
   3  19  -1  173.98   29.60
  -3 -19   1  235.68   30.80
  -3 -19   1  203.48   16.80
  -3 -19   1  171.38   15.50
  -3 -19   1  186.78   27.80
   2  19  -1   -0.50    8.20
   2  19  -1   12.10    8.20
   2  19  -1   -0.30    7.80
  -2 -19   1    9.20    9.20
   1  19  -1   80.79   20.60
   1  19  -1   99.19   19.80
   1  19  -1  122.09   20.90
  -1 -19   1   97.29   18.50
   0  19  -1   73.79   17.70
   0  19  -1   43.50   13.30
   0  19  -1   68.19   19.80
   0 -19   1   60.09   13.30
  -1  19  -1   -1.60    9.20
  -1  19  -1   24.20   10.90
  -1  19  -1   26.60   11.80
  12  18  -1   44.30   13.60
  12  18  -1   46.30   15.40
 -12 -18   1   22.70   10.40
 -12 -18   1   26.20   16.60
 -12 -18   1   30.80   17.40
  11  18  -1  111.99   20.20
  11  18  -1  139.29   23.90
 -11 -18   1   75.69   23.30
 -11 -18   1   96.99   24.00
 -11 -18   1  133.59   20.50
  10  18  -1    2.40    4.80
  10  18  -1    2.20    6.40
  10  18  -1   17.60   10.10
 -10 -18   1   -7.30    8.10
 -10 -18   1    7.70    6.90
 -10 -18   1   -6.40    9.50
   9  18  -1  319.77   31.80
   9  18  -1  332.17   28.70
   9  18  -1  296.97   39.00
  -9 -18   1  261.47   40.00
  -9 -18   1  275.67   31.30
  -9 -18   1  341.57   41.20
   8  18  -1   37.30   11.40
   8  18  -1   37.80   11.50
   8  18  -1   44.60   14.40
   8  18  -1   24.40    8.80
  -8 -18   1   48.20   16.20
  -8 -18   1   38.20   15.00
  -8 -18   1   29.70    9.40
   7  18  -1  187.08   26.20
   7  18  -1  201.08   26.00
   7  18  -1  153.88   27.20
   7  18  -1  168.98   22.00
  -7 -18   1  151.48   25.60
  -7 -18   1  171.38   21.60
  -7 -18   1  200.28   30.90
   6  18  -1  142.99   22.10
   6  18  -1  155.88   20.90
   6  18  -1  113.29   23.20
   6  18  -1  145.79   22.20
  -6 -18   1  162.58   24.60
  -6 -18   1  133.39   18.20
  -6 -18   1  165.38   27.30
  -6 -18   1  149.19   24.00
   5  18  -1    6.10    7.20
   5  18  -1    2.20    7.70
   5  18  -1    8.80    6.90
   5  18  -1   -9.40    4.90
  -5 -18   1    2.10    7.60
  -5 -18   1  -10.40    6.50
  -5 -18   1    0.30    4.70
   4  18  -1    0.40    6.00
   4  18  -1    0.20    6.60
   4  18  -1   -4.00    6.90
   4  18  -1   -1.90    6.10
  -4 -18   1   -3.00    6.60
  -4 -18   1   -4.20    5.60
  -4 -18   1   26.50   13.70
  -4 -18   1    3.90    4.60
  -4 -18   1    3.60    8.40
   3  18  -1    0.50    5.60
   3  18  -1    5.90    6.60
   3  18  -1    0.20    7.30
   3  18  -1   -0.60    6.30
  -3 -18   1   -6.10    5.70
  -3 -18   1    1.40    5.40
  -3 -18   1   -8.50    7.00
  -3 -18   1    1.20    4.10
   2  18  -1  215.58   26.40
   2  18  -1  105.59   23.30
   2  18  -1  192.28   26.50
  -2 -18   1  185.88   27.30
  -2 -18   1  175.38   26.00
  -2 -18   1  170.28   15.30
  -2 -18   1  168.18   14.50
   1  18  -1   73.09   16.00
   1  18  -1   57.69   17.00
   1  18  -1   82.69   17.40
  -1 -18   1   72.19   20.50
  -1 -18   1   89.49   17.50
   0  18  -1    5.60    9.70
   0  18  -1    5.30    8.00
   0  18  -1   10.00    7.70
   0 -18   1   -2.70    6.90
  -1  18  -1   29.60   12.70
  -1  18  -1   61.39   15.00
  -1  18  -1   90.49   19.00
   1 -18   1   57.79   12.40
  -2  18  -1   20.70   12.60
  -2  18  -1   25.90   11.40
  -2  18  -1   34.30   13.10
  -3  18  -1   58.69   19.40
  -3  18  -1   87.29   18.70
  -3  18  -1   67.99   19.10
  12  17  -1   75.09   17.00
  12  17  -1  121.59   23.00
 -12 -17   1   94.09   26.20
 -12 -17   1   58.99   20.20
 -12 -17   1   88.39   17.50
  11  17  -1   19.20   10.10
  11  17  -1   25.30   10.60
 -11 -17   1   23.40   15.10
 -11 -17   1   31.70   11.90
 -11 -17   1   13.00   13.10
  10  17  -1  248.18   22.50
  10  17  -1  216.58   28.20
  10  17  -1  232.98   32.20
 -10 -17   1  208.28   33.50
 -10 -17   1  217.78   35.30
 -10 -17   1  238.28   27.80
   9  17  -1   11.80    9.20
   9  17  -1   10.10    7.50
   9  17  -1   14.10    6.30
  -9 -17   1   20.10    8.90
  -9 -17   1   20.60   12.40
  -9 -17   1   17.70   11.40
   8  17  -1  262.27   27.40
   8  17  -1  297.27   25.40
   8  17  -1  216.48   32.20
   8  17  -1  281.97   27.70
  -8 -17   1  235.28   27.60
  -8 -17   1  212.08   33.80
  -8 -17   1  230.08   33.00
   7  17  -1  144.29   21.30
   7  17  -1  143.79   18.80
   7  17  -1  140.79   24.50
   7  17  -1  114.99   19.60
  -7 -17   1  145.19   23.90
  -7 -17   1  117.49   17.60
  -7 -17   1  131.59   25.10
   6  17  -1    2.10    6.00
   6  17  -1   -2.00    5.10
   6  17  -1    1.00    5.50
   6  17  -1    0.70    6.60
  -6 -17   1   -6.10    6.60
  -6 -17   1    4.20    5.40
  -6 -17   1   -2.90    8.50
  -6 -17   1    4.80    9.00
   5  17  -1  228.68   28.30
   5  17  -1  269.27   28.70
   5  17  -1  247.88   32.80
   5  17  -1  284.17   27.00
  -5 -17   1  295.97   29.00
  -5 -17   1  161.78   25.90
  -5 -17   1  236.48   28.40
  -5 -17   1  212.78   23.70
  -5 -17   1  238.88   32.70
   4  17  -1  249.68   28.80
   4  17  -1  208.88   26.70
   4  17  -1  218.38   26.40
   4  17  -1  216.48   30.40
  -4 -17   1  185.58   26.00
  -4 -17   1  231.08   28.40
  -4 -17   1  222.98   20.90
  -4 -17   1  215.48   27.10
  -4 -17   1  225.58   30.20
   3  17  -1   31.60   12.10
   3  17  -1   35.20   11.20
   3  17  -1   47.10   12.20
   3  17  -1   28.30    9.40
  -3 -17   1   27.50    9.90
  -3 -17   1   47.70   14.20
  -3 -17   1   10.50    7.60
  -3 -17   1   24.50   10.00
  -3 -17   1   30.10    7.30
   2  17  -1  164.38   23.70
   2  17  -1  137.49   23.90
   2  17  -1  153.18   22.20
   2  17  -1  162.88   27.10
  -2 -17   1  167.68   15.10
  -2 -17   1  137.89   22.80
  -2 -17   1  154.58   24.10
  -2 -17   1  145.99   25.50
  -2 -17   1  139.69   16.90
   1  17  -1    1.40    6.60
   1  17  -1    4.50    6.00
   1  17  -1   12.60    8.80
  -1 -17   1    4.10    3.00
  -1 -17   1   12.30    8.60
  -1 -17   1    4.20    7.80
  -1 -17   1   -6.00    6.30
  -1 -17   1    0.80    3.50
   0  17  -1  150.58   26.30
   0  17  -1  146.89   24.10
   0  17  -1  203.88   25.90
   0 -17   1  157.18   26.10
   0 -17   1  198.28   27.00
   0 -17   1  192.78   25.00
  -1  17  -1   57.69   17.30
  -1  17  -1   76.79   16.90
  -1  17  -1   71.29   15.70
   1 -17   1   62.39   16.30
   1 -17   1   71.39   14.40
  -2  17  -1  199.18   33.00
  -2  17  -1  254.97   33.90
  -2  17  -1  251.37   31.30
   2 -17   1  250.97   23.70
   2 -17   1  240.78   30.80
  -3  17  -1   52.59   15.60
  -3  17  -1   35.50   14.40
  -3  17  -1   71.29   16.90
  -4  17  -1   -7.70    7.50
  -4  17  -1   -0.60    8.20
  -4  17  -1   -7.40    6.20
  13  16  -1  105.79   19.50
  13  16  -1   79.39   20.00
 -13 -16   1   77.99   23.00
 -13 -16   1   50.09   21.20
 -13 -16   1  100.29   19.20
  12  16  -1   27.10   11.80
  12  16  -1   -1.10    6.20
 -12 -16   1   -2.60    9.80
 -12 -16   1   13.60   12.60
 -12 -16   1    2.50    7.80
  11  16  -1   68.29   15.00
  11  16  -1   76.19   17.80
 -11 -16   1   52.79   19.00
 -11 -16   1   79.19   15.30
 -11 -16   1   25.50   15.40
  10  16  -1  189.28   24.90
  10  16  -1  198.68   28.70
  10  16  -1  141.29   18.10
 -10 -16   1  160.58   29.10
 -10 -16   1  166.68   28.60
 -10 -16   1  186.18   23.90
   9  16  -1  130.39   19.10
   9  16  -1   92.79   19.20
   9  16  -1  113.69   15.00
  -9 -16   1  106.39   17.10
  -9 -16   1   71.39   19.20
  -9 -16   1  119.19   24.30
   8  16  -1  453.65   39.70
   8  16  -1  396.06   38.80
   8  16  -1  467.65   37.20
   8  16  -1  437.26   42.60
  -8 -16   1  460.05   38.70
  -8 -16   1  533.35   47.50
  -8 -16   1  478.75   44.60
   7  16  -1   -3.60    5.10
   7  16  -1   -2.40    5.30
   7  16  -1   10.10    5.90
   7  16  -1    5.60    5.90
  -7 -16   1   -1.70    6.90
  -7 -16   1   -4.40    4.10
  -7 -16   1   -3.80    6.00
   6  16  -1   89.39   14.30
   6  16  -1   63.69   13.50
   6  16  -1   82.99   16.80
   6  16  -1   73.19   14.20
  -6 -16   1   64.49   12.80
  -6 -16   1   76.99   13.10
  -6 -16   1   73.59   17.80
  -6 -16   1   72.79   16.60
   5  16  -1   81.59   15.10
   5  16  -1   56.99   14.50
   5  16  -1   77.39   14.70
   5  16  -1   80.09   14.00
  -5 -16   1   62.39   12.70
  -5 -16   1   74.99   16.50
  -5 -16   1   51.29   15.10
  -5 -16   1   48.90   13.90
  -5 -16   1   53.39   10.90
   4  16  -1    2.10    4.80
   4  16  -1    8.20    6.40
   4  16  -1    3.20    6.00
   4  16  -1    1.70    6.00
  -4 -16   1   14.00    7.30
  -4 -16   1    6.00   11.20
  -4 -16   1    0.70    7.00
  -4 -16   1    2.60    4.30
  -4 -16   1   13.60    8.80
  -4 -16   1   -1.30    6.50
   3  16  -1  117.99   20.70
   3  16  -1  119.29   18.10
   3  16  -1  118.49   18.40
   3  16  -1  121.89   17.90
  -3 -16   1   77.79   13.90
  -3 -16   1   77.39   16.00
  -3 -16   1   67.59   16.10
  -3 -16   1   93.89   13.10
  -3 -16   1   99.69   17.00
  -3 -16   1   88.29   15.80
   2  16  -1    5.10    6.10
   2  16  -1    1.70    4.90
   2  16  -1   -3.80    5.70
   2  16  -1   -3.20    5.80
  -2 -16   1    2.80    5.80
  -2 -16   1    1.60    3.40
  -2 -16   1    3.20    6.40
  -2 -16   1    3.60    5.90
  -2 -16   1   -4.80    5.40
   1  16  -1  167.98   23.70
   1  16  -1  165.18   25.90
   1  16  -1  178.68   27.40
   1  16  -1  159.98   22.20
  -1 -16   1  164.48   24.80
  -1 -16   1  167.78   17.80
  -1 -16   1  176.28   18.90
  -1 -16   1  185.08   15.90
  -1 -16   1  173.28   24.40
  -1 -16   1  211.48   26.00
   0  16  -1  205.18   26.00
   0  16  -1  159.18   26.90
   0  16  -1  197.58   27.20
   0 -16   1  182.38   24.90
   0 -16   1  225.98   15.20
   0 -16   1  197.28   15.20
   0 -16   1  219.98   29.50
   0 -16   1  192.78   26.40
  -1  16  -1   26.50   10.30
  -1  16  -1    4.70    6.40
  -1  16  -1    0.60    7.40
   1 -16   1    1.40    6.60
   1 -16   1   -7.20    5.20
   1 -16   1   15.40    8.00
  -2  16  -1  290.67   37.50
  -2  16  -1  242.58   33.10
  -2  16  -1  277.17   29.10
   2 -16   1  272.17   26.50
   2 -16   1  291.27   32.90
  -3  16  -1   25.50   10.80
  -3  16  -1   11.00    8.70
  -3  16  -1   17.40   10.50
   3 -16   1   33.50   10.70
   3 -16   1   15.30    6.60
  -4  16  -1   92.69   19.10
  -4  16  -1   85.09   20.00
  -4  16  -1   98.89   22.10
  -5  16  -1   64.59   18.70
  -5  16  -1   83.89   19.20
  -5  16  -1   48.30   14.90
 -14 -15   1   29.60   17.00
  13  15  -1   11.20    8.40
  13  15  -1    5.60    8.70
 -13 -15   1   -6.50   10.60
 -13 -15   1    5.20    8.60
 -13 -15   1    6.60   12.80
  12  15  -1  236.58   32.40
  12  15  -1  208.48   28.70
  12  15  -1  246.48   29.10
 -12 -15   1  190.48   33.80
 -12 -15   1  172.58   33.50
 -12 -15   1  263.67   30.10
  11  15  -1  139.99   20.80
  11  15  -1  109.19   21.60
 -11 -15   1  108.29   24.10
 -11 -15   1  137.69   20.40
 -11 -15   1  120.19   25.90
  10  15  -1   39.50    8.30
  10  15  -1   50.29   12.00
  10  15  -1   52.19   14.50
 -10 -15   1   25.70   13.10
 -10 -15   1   29.90   13.90
 -10 -15   1   40.60   10.90
   9  15  -1  472.85   36.70
   9  15  -1  460.95   40.10
   9  15  -1  417.26   42.10
  -9 -15   1  439.66   44.50
  -9 -15   1  490.85   40.00
  -9 -15   1  482.55   46.90
   8  15  -1   40.90   12.30
   8  15  -1   51.19   11.60
   8  15  -1   40.80    8.80
   8  15  -1   31.60    9.80
  -8 -15   1   51.99   11.40
  -8 -15   1   53.29   14.70
  -8 -15   1   35.90   13.40
   7  15  -1  103.19   14.70
   7  15  -1  129.99   20.80
   7  15  -1  123.79   18.30
   7  15  -1  119.09   17.80
  -7 -15   1   96.29   15.40
  -7 -15   1  118.89   20.90
  -7 -15   1  108.49   21.00
   6  15  -1  294.67   28.10
   6  15  -1  293.87   34.50
   6  15  -1  304.17   26.90
   6  15  -1  334.97   29.10
  -6 -15   1  256.67   34.40
  -6 -15   1  307.67   31.30
  -6 -15   1  283.77   26.60
  -6 -15   1  282.27   26.70
   5  15  -1   -5.20    4.80
   5  15  -1   -6.20    3.40
   5  15  -1    1.70    4.50
   5  15  -1    0.80    4.20
  -5 -15   1    3.90    4.60
  -5 -15   1    2.30    6.60
  -5 -15   1    2.10    6.80
  -5 -15   1    4.90    5.10
   4  15  -1  387.66   36.50
   4  15  -1  382.36   32.90
   4  15  -1  339.67   32.70
   4  15  -1  364.76   32.70
  -4 -15   1  399.66   36.90
  -4 -15   1  345.07   34.00
  -4 -15   1  387.76   35.40
  -4 -15   1  347.97   30.50
  -4 -15   1  372.26   33.80
  -4 -15   1  406.76   33.80
   3  15  -1  274.87   29.60
   3  15  -1  273.27   26.40
   3  15  -1  277.37   33.20
   3  15  -1  292.07   27.50
  -3 -15   1  266.27   24.00
  -3 -15   1  226.78   27.60
  -3 -15   1  270.57   30.60
  -3 -15   1  310.07   29.40
  -3 -15   1  269.57   32.50
  -3 -15   1  286.97   27.80
   2  15  -1   44.30   11.90
   2  15  -1   48.20   13.90
   2  15  -1   44.30   10.70
   2  15  -1   54.39   12.30
  -2 -15   1   60.39   13.30
  -2 -15   1   58.89    9.30
  -2 -15   1   52.69   13.30
  -2 -15   1   48.50   10.70
  -2 -15   1   43.70   12.00
  -2 -15   1   56.49   13.40
  -2 -15   1   73.29   13.30
   1  15  -1    8.10    6.20
   1  15  -1    5.60    6.00
   1  15  -1   15.70    8.30
   1  15  -1   18.20    9.10
  -1 -15   1    5.70    6.80
  -1 -15   1    9.20    5.30
  -1 -15   1   -0.80    5.80
  -1 -15   1    4.30    5.70
  -1 -15   1   11.90    7.90
  -1 -15   1    4.60    3.70
  -1 -15   1    9.50    7.40
   0  15  -1  213.88   26.80
   0  15  -1  169.38   25.50
   0  15  -1  181.28   23.20
   0  15  -1  186.68   24.70
   0 -15   1  175.18   24.00
   0 -15   1  186.18   25.90
   0 -15   1  185.38   24.50
   0 -15   1  169.18   17.80
   0 -15   1  179.88   15.30
   0 -15   1  165.38   16.00
  -1  15  -1  123.49   19.50
  -1  15  -1  139.09   23.60
  -1  15  -1  126.69   20.60
   1 -15   1  135.19   20.20
   1 -15   1  131.99   19.60
   1 -15   1  105.39   20.40
  -2  15  -1   15.20    8.20
  -2  15  -1   23.50    9.90
  -2  15  -1    9.70    7.10
   2 -15   1   18.40   10.50
   2 -15   1   18.80    8.90
   2 -15   1   27.10    9.00
  -3  15  -1  116.99   19.90
  -3  15  -1   78.99   18.30
  -3  15  -1   72.09   17.20
   3 -15   1   93.39   14.30
   3 -15   1   90.39   16.50
  -4  15  -1  117.89   23.40
  -4  15  -1  170.68   25.00
  -4  15  -1  125.69   23.00
   4 -15   1  138.89   20.90
   4 -15   1  124.99   17.50
  -5  15  -1   12.80    9.00
  -5  15  -1    6.90    8.90
  -5  15  -1   -1.40    7.20
  -6  15  -1  183.38   30.40
  -6  15  -1  180.28   28.30
  -6  15  -1  162.28   29.20
 -14 -14   1   20.50   11.60
 -14 -14   1   18.40   14.60
 -14 -14   1   50.09   19.50
  13  14  -1   35.30   13.30
  13  14  -1   31.80   11.00
 -13 -14   1   40.20   17.70
 -13 -14   1   26.50   17.40
 -13 -14   1   27.00   11.20
  12  14  -1  130.69   20.50
  12  14  -1  138.49   23.10
  12  14  -1  168.48   23.90
 -12 -14   1  116.69   26.00
 -12 -14   1  122.79   27.10
 -12 -14   1  107.99   19.40
  11  14  -1    8.60    8.30
  11  14  -1    2.20    5.90
 -11 -14   1   -4.00    5.40
 -11 -14   1    4.20   10.20
 -11 -14   1   13.80   12.40
  10  14  -1  200.88   26.70
  10  14  -1  196.68   24.30
 -10 -14   1  176.18   23.30
 -10 -14   1  195.28   30.90
 -10 -14   1  144.59   26.90
   9  14  -1  124.19   20.80
   9  14  -1  136.19   19.30
   9  14  -1  142.69   16.10
  -9 -14   1  136.69   24.80
  -9 -14   1  123.59   18.40
  -9 -14   1  140.59   24.30
   8  14  -1  246.98   23.80
   8  14  -1  201.58   27.60
   8  14  -1  241.78   21.10
  -8 -14   1  184.38   23.50
  -8 -14   1  209.58   31.20
  -8 -14   1  254.47   31.60
   7  14  -1  203.78   20.60
   7  14  -1  157.78   23.00
   7  14  -1  161.18   21.40
   7  14  -1  182.98   22.00
  -7 -14   1  155.68   19.90
  -7 -14   1  169.88   26.20
  -7 -14   1  157.38   24.20
   6  14  -1   -0.20    4.50
   6  14  -1    0.30    5.20
   6  14  -1    1.70    3.90
   6  14  -1   -1.70    3.90
  -6 -14   1    1.40    9.40
  -6 -14   1    1.20    3.90
  -6 -14   1    5.00    7.40
  -6 -14   1   -5.90    4.50
  -6 -14   1   -1.80    3.50
   5  14  -1  305.97   50.89
   5  14  -1  350.46   34.80
   5  14  -1  358.46   32.60
   5  14  -1  468.25   43.00
   5  14  -1  363.26   31.70
   5  14  -1  401.96   33.20
  -5 -14   1  414.66   32.70
  -5 -14   1  367.56   35.10
  -5 -14   1  352.96   35.80
  -5 -14   1  392.26   31.70
  -5 -14   1  354.56   34.70
   4  14  -1  127.09   17.10
   4  14  -1  110.99   16.40
   4  14  -1   84.19   21.40
   4  14  -1   99.99   18.40
   4  14  -1  138.49   17.60
   4  14  -1  112.39   17.10
   4  14  -1  133.19   19.10
  -4 -14   1  115.69   19.40
  -4 -14   1  130.39   19.20
  -4 -14   1  101.09   16.70
  -4 -14   1  144.59   18.20
  -4 -14   1  115.49   15.10
   3  14  -1  143.29   28.60
   3  14  -1  184.98   23.00
   3  14  -1  230.48   24.00
   3  14  -1  149.39   23.30
   3  14  -1  175.18   20.90
   3  14  -1  191.78   19.80
   3  14  -1  182.58   23.40
  -3 -14   1  169.18   22.70
  -3 -14   1  192.28   19.90
  -3 -14   1  190.38   23.20
  -3 -14   1  197.88   26.00
  -3 -14   1  169.98   21.90
  -3 -14   1  236.78   27.00
   2  14  -1  176.58   22.50
   2  14  -1  190.78   23.30
   2  14  -1  182.18   25.30
   2  14  -1  188.48   19.60
   2  14  -1  196.08   21.60
   2  14  -1  227.18   30.90
   2  14  -1  189.48   31.50
  -2 -14   1  162.48   23.10
  -2 -14   1  163.88   22.30
  -2 -14   1  219.78   21.40
  -2 -14   1  221.98   26.80
  -2 -14   1  164.28   18.50
  -2 -14   1  156.48   20.50
  -2 -14   1  182.88   23.60
   1  14  -1   10.60    6.70
   1  14  -1    5.00    9.00
   1  14  -1    6.30    4.90
   1  14  -1   10.90    6.20
   1  14  -1    5.20    4.80
   1  14  -1    8.30    6.80
  -1 -14   1    9.00    6.90
  -1 -14   1    8.90    6.60
  -1 -14   1    2.80    5.20
  -1 -14   1    9.20    4.30
  -1 -14   1    6.70    5.80
  -1 -14   1    9.00    6.70
  -1 -14   1   -3.40    5.00
   0  14  -1   93.39   17.60
   0  14  -1   73.89   13.40
   0  14  -1   80.49   14.90
   0  14  -1  102.59   22.90
   0  14  -1   70.19   12.40
   0  14  -1   72.29   15.30
   0 -14   1   74.69   14.50
   0 -14   1   75.79   12.30
   0 -14   1   77.79   11.40
   0 -14   1   77.49   15.40
   0 -14   1   99.99   16.20
   0 -14   1   68.39    9.50
   0 -14   1   71.99   11.90
  -1  14  -1   85.99   16.60
  -1  14  -1   65.59   15.40
  -1  14  -1   64.79   14.40
  -1  14  -1   74.89   20.40
  -1  14  -1  103.29   16.30
   1 -14   1  100.89   18.20
   1 -14   1   74.49    8.90
   1 -14   1   88.69   11.90
   1 -14   1   84.69   15.00
   1 -14   1   98.39   10.20
   1 -14   1   76.89   14.50
  -2  14  -1  108.49   18.90
  -2  14  -1  127.59   22.00
  -2  14  -1  127.29   19.50
   2 -14   1  107.29   19.90
   2 -14   1  106.69   17.40
   2 -14   1  112.89   17.60
  -3  14  -1  307.07   32.10
  -3  14  -1  290.97   36.90
  -3  14  -1  330.67   30.10
  -3  14  -1  301.67   31.00
   3 -14   1  332.47   29.00
   3 -14   1  269.57   36.40
   3 -14   1  322.97   29.90
  -4  14  -1   -0.20    6.00
  -4  14  -1   -7.80    5.70
  -4  14  -1    1.60    6.90
  -4  14  -1   -7.10    4.70
   4 -14   1    2.90    6.20
   4 -14   1   -0.10    4.70
  -5  14  -1  169.68   26.90
  -5  14  -1  132.79   22.80
  -5  14  -1  136.59   24.90
   5 -14   1  127.69   20.30
  -6  14  -1   74.99   18.90
  -6  14  -1   67.89   18.00
  -6  14  -1   56.59   16.90
  -7  14  -1   11.50   11.10
  -7  14  -1   10.60    9.50
  -7  14  -1   32.00   13.00
 -14 -13   1    8.90   12.70
 -14 -13   1    5.80   11.80
  13  13  -1  139.39   24.00
  13  13  -1  107.89   19.00
 -13 -13   1  164.88   24.10
 -13 -13   1  114.89   27.50
 -13 -13   1   93.49   24.50
  12  13  -1   21.90    8.70
  12  13  -1   13.90    8.60
  12  13  -1   11.30    8.50
 -12 -13   1   18.60   13.40
 -12 -13   1   21.40    9.20
 -12 -13   1   -5.50    8.70
  11  13  -1  170.88   22.30
  11  13  -1  155.18   23.40
 -11 -13   1  136.09   27.00
 -11 -13   1  141.79   28.30
 -11 -13   1  149.49   21.80
  10  13  -1   28.60    9.10
  10  13  -1   42.90   12.20
 -10 -13   1   27.90    9.80
 -10 -13   1   42.80   14.80
 -10 -13   1   45.30   15.30
   9  13  -1   12.30    7.70
   9  13  -1   12.80    6.20
   9  13  -1   14.70    4.90
  -9 -13   1   10.50    6.40
  -9 -13   1    2.70    7.50
  -9 -13   1    9.60    9.30
   8  13  -1  336.97   25.70
   8  13  -1  291.17   27.50
   8  13  -1  273.87   32.60
  -8 -13   1  284.87   31.50
  -8 -13   1  258.47   35.20
  -8 -13   1  322.57   28.10
   7  13  -1    3.10    3.80
   7  13  -1    1.50    5.20
   7  13  -1    6.90    4.60
   7  13  -1    1.50    4.60
   7  13  -1    3.20    5.90
  -7 -13   1    1.70    6.30
  -7 -13   1    8.90    7.70
  -7 -13   1   13.60    9.80
  -7 -13   1   -1.60    3.60
  -7 -13   1    8.20   10.10
   6  13  -1  100.09   13.70
   6  13  -1   75.29   13.50
   6  13  -1   97.99   14.90
   6  13  -1   79.79   15.40
   6  13  -1   69.39   19.30
   6  13  -1   76.39   13.20
   6  13  -1  126.89   18.10
  -6 -13   1   91.99   20.30
  -6 -13   1   94.59   14.00
  -6 -13   1  101.39   13.40
  -6 -13   1  126.89   14.60
  -6 -13   1  135.19   18.30
  -6 -13   1  104.69   18.90
  -6 -13   1  110.49   18.90
  -6 -13   1   98.59   18.10
   5  13  -1  589.34   52.09
   5  13  -1  691.83   50.69
   5  13  -1  714.33   53.09
   5  13  -1  661.13   50.59
   5  13  -1  662.73   49.99
   5  13  -1  727.93   49.99
   5  13  -1  585.04   58.69
  -5 -13   1  597.44   50.69
  -5 -13   1  637.14   54.09
  -5 -13   1  713.13   58.59
  -5 -13   1  645.74   49.20
  -5 -13   1  646.34   48.40
  -5 -13   1  648.44   47.80
  -5 -13   1  655.03   52.99
  -5 -13   1  686.83   49.60
  -5 -13   1  575.94   50.79
   4  13  -1   77.09   14.50
   4  13  -1   78.89   13.20
   4  13  -1   83.89   19.60
   4  13  -1   88.19   14.90
   4  13  -1   32.80    9.40
   4  13  -1   83.89   13.00
   4  13  -1   73.19   12.40
   4  13  -1   75.29    8.70
  -4 -13   1   76.19   11.60
  -4 -13   1   76.19   14.30
  -4 -13   1   86.19   16.00
  -4 -13   1   62.79   11.60
  -4 -13   1   75.59   11.30
  -4 -13   1   80.89   10.60
  -4 -13   1   88.69   17.80
  -4 -13   1   92.79   14.40
   3  13  -1  567.24   41.00
   3  13  -1  538.05   42.80
   3  13  -1  460.15   42.80
   3  13  -1  449.36   48.60
   3  13  -1  502.85   40.90
   3  13  -1  486.35   40.30
   3  13  -1  461.25   40.60
  -3 -13   1  538.85   41.80
  -3 -13   1  571.74   50.89
  -3 -13   1  599.14   44.70
  -3 -13   1  519.55   43.90
  -3 -13   1  468.55   41.60
  -3 -13   1  549.25   38.20
  -3 -13   1  512.65   39.20
  -3 -13   1  455.85   40.80
   2  13  -1  171.48   21.40
   2  13  -1  140.09   26.70
   2  13  -1  156.38   18.10
   2  13  -1  170.08   18.30
   2  13  -1  175.38   23.60
   2  13  -1  208.28   21.10
   2  13  -1  196.58   23.00
   2  13  -1  174.08   21.30
  -2 -13   1  197.28   23.20
  -2 -13   1  183.68   23.60
  -2 -13   1  190.38   20.10
  -2 -13   1  191.08   22.20
  -2 -13   1  158.78   20.20
  -2 -13   1  171.08   20.90
  -2 -13   1  198.28   24.70
  -2 -13   1  161.88   15.60
  -2 -13   1  178.98   17.00
   1  13  -1  356.76   33.20
   1  13  -1  328.17   30.30
   1  13  -1  397.26   34.70
   1  13  -1  411.96   33.40
   1  13  -1  443.26   33.30
   1  13  -1  434.56   35.10
   1  13  -1  417.06   42.30
   1  13  -1  359.06   35.40
  -1 -13   1  376.76   32.50
  -1 -13   1  421.16   29.90
  -1 -13   1  346.97   33.90
  -1 -13   1  348.77   34.30
  -1 -13   1  358.96   33.90
  -1 -13   1  403.26   30.70
  -1 -13   1  374.06   34.40
  -1 -13   1  415.36   33.60
  -1 -13   1  456.55   34.30
   0  13  -1  408.96   34.90
   0  13  -1  391.46   36.30
   0  13  -1  437.86   36.30
   0  13  -1  421.06   35.20
   0  13  -1  381.66   47.20
   0  13  -1  408.56   33.80
   0  13  -1  465.15   33.90
   0 -13   1  397.36   33.30
   0 -13   1  359.06   29.90
   0 -13   1  371.06   34.60
   0 -13   1  382.56   34.40
   0 -13   1  423.46   33.20
   0 -13   1  399.26   29.60
   0 -13   1  380.76   35.50
   0 -13   1  390.76   31.80
   0 -13   1  326.27   32.30
  -1  13  -1    2.00    4.80
  -1  13  -1    1.30    5.40
  -1  13  -1   -0.40    7.10
  -1  13  -1   10.40    5.50
  -1  13  -1    3.70    5.60
  -1  13  -1    4.80    5.60
  -1  13  -1   12.20    7.60
  -1  13  -1    6.80    4.30
   1 -13   1    5.40    4.70
   1 -13   1    0.30    5.50
   1 -13   1    5.50    4.50
   1 -13   1    7.40    5.60
   1 -13   1    7.70    3.40
   1 -13   1    8.40    6.70
   1 -13   1    3.10    4.30
   1 -13   1    5.40    3.90
  -2  13  -1   54.29   10.60
  -2  13  -1   53.79   10.50
  -2  13  -1   39.40   10.70
  -2  13  -1   30.90   10.70
  -2  13  -1   40.90   15.10
  -2  13  -1   35.70   11.90
  -2  13  -1   47.70   12.60
   2 -13   1   50.59   11.40
   2 -13   1   45.10    5.40
   2 -13   1   51.69    8.10
   2 -13   1   55.39   11.40
   2 -13   1   47.90   13.10
   2 -13   1   49.99    5.90
  -3  13  -1   17.30    8.30
  -3  13  -1   17.00    9.20
  -3  13  -1   11.40    6.90
  -3  13  -1   15.90   11.30
  -3  13  -1   12.10    8.60
   3 -13   1    8.30    8.60
   3 -13   1   27.40    9.00
   3 -13   1   13.40    6.10
  -4  13  -1   78.69   17.00
  -4  13  -1   73.59   17.70
  -4  13  -1   91.89   18.30
  -4  13  -1  110.59   16.40
   4 -13   1   91.99   15.30
   4 -13   1  101.99   14.70
   4 -13   1   69.39   17.20
  -5  13  -1  108.79   17.90
  -5  13  -1  120.09   20.90
  -5  13  -1  105.89   21.00
  -5  13  -1  106.89   20.90
   5 -13   1   87.89   16.00
   5 -13   1  123.89   14.50
  -6  13  -1    6.50    9.00
  -6  13  -1    5.50    8.50
  -6  13  -1    1.50    7.70
  -7  13  -1  152.48   26.20
  -7  13  -1  102.69   22.00
  -7  13  -1  125.99   25.70
  -8  13  -1    6.90   10.90
  -8  13  -1   11.30   12.30
  -8  13  -1    9.00   10.70
 -15 -12   1   21.70   17.80
  14  12  -1  215.18   28.60
 -14 -12   1  178.28   33.60
 -14 -12   1  132.09   31.60
  13  12  -1   54.39   14.70
 -13 -12   1   42.90   18.10
 -13 -12   1   58.99   15.00
 -13 -12   1   51.69   18.60
  12  12  -1  182.38   25.70
  12  12  -1  164.78   22.80
  12  12  -1  172.38   22.90
 -12 -12   1  133.29   27.20
 -12 -12   1  126.79   27.10
 -12 -12   1  138.09   21.90
  11  12  -1  105.39   18.30
  11  12  -1  113.99   19.10
  11  12  -1  100.99   17.10
 -11 -12   1   73.49   15.20
 -11 -12   1   98.49   22.10
 -11 -12   1   79.19   21.20
  10  12  -1   19.30    9.40
  10  12  -1   14.10    7.00
 -10 -12   1   24.40   11.20
 -10 -12   1   20.90   11.60
 -10 -12   1   18.70    7.90
   9  12  -1  225.78   27.70
   9  12  -1  208.88   22.00
   9  12  -1  240.28   19.60
  -9 -12   1  222.78   25.00
  -9 -12   1  225.68   30.50
  -9 -12   1  171.58   28.70
   8  12  -1    8.40    6.40
   8  12  -1   11.80    6.10
   8  12  -1   11.70    4.60
   8  12  -1   12.80    6.70
  -8 -12   1   17.10    9.10
  -8 -12   1   19.60    8.30
  -8 -12   1    7.20   10.80
  -8 -12   1    8.60    5.20
  -8 -12   1   13.80    9.10
   7  12  -1   38.50    9.40
   7  12  -1   30.00    9.40
   7  12  -1   44.80    8.10
   7  12  -1   69.99   18.30
   7  12  -1   60.59   11.00
   7  12  -1   55.89   12.10
   7  12  -1   58.09   11.00
  -7 -12   1   43.10    8.20
  -7 -12   1   57.29   11.70
  -7 -12   1   43.10   13.00
  -7 -12   1   59.79   10.10
  -7 -12   1   76.19   12.30
  -7 -12   1   53.79   13.30
  -7 -12   1   50.89   16.00
   6  12  -1   36.20    8.80
   6  12  -1   32.80    9.60
   6  12  -1   36.20    7.70
   6  12  -1   33.00    8.20
   6  12  -1   48.00   10.00
   6  12  -1   30.50   12.90
   6  12  -1   43.20   11.10
  -6 -12   1   59.69   10.60
  -6 -12   1   54.89   11.40
  -6 -12   1   31.60   11.00
  -6 -12   1   43.40   10.10
  -6 -12   1   40.90    8.40
  -6 -12   1   42.30    7.70
  -6 -12   1   48.60   14.40
  -6 -12   1   25.10    9.90
   5  12  -1   22.40    6.40
   5  12  -1   14.50    9.80
   5  12  -1   28.80    8.30
   5  12  -1   25.20    7.30
   5  12  -1   19.50    6.50
   5  12  -1   19.50    7.70
   5  12  -1   27.60    7.60
  -5 -12   1   24.30    8.90
  -5 -12   1   20.60    6.40
  -5 -12   1   14.20    6.10
  -5 -12   1   22.80    6.30
  -5 -12   1   27.70    9.30
  -5 -12   1   24.00    5.80
  -5 -12   1   46.90   13.50
  -5 -12   1   22.20    6.40
   4  12  -1  631.94   47.80
   4  12  -1  714.13   48.60
   4  12  -1  641.74   48.20
   4  12  -1  627.84   42.10
   4  12  -1  646.34   48.60
   4  12  -1  511.65   54.49
   4  12  -1  632.24   50.79
   4  12  -1  650.03   50.09
  -4 -12   1  655.53   46.10
  -4 -12   1  566.24   50.69
  -4 -12   1  653.73   54.69
  -4 -12   1  578.14   46.90
  -4 -12   1  613.24   46.50
  -4 -12   1  646.54   48.00
  -4 -12   1  685.83   50.99
  -4 -12   1  691.53   49.90
   3  12  -1   98.59   14.70
   3  12  -1  117.69   15.70
   3  12  -1   78.29   14.30
   3  12  -1   74.59   11.80
   3  12  -1   55.09   15.80
   3  12  -1   73.89   12.20
   3  12  -1   79.19   12.30
   3  12  -1   72.39   12.10
   3  12  -1   89.09    8.60
  -3 -12   1   86.69   15.20
  -3 -12   1  100.29   15.40
  -3 -12   1   76.39   12.70
  -3 -12   1   77.19   12.50
  -3 -12   1   89.99   10.70
  -3 -12   1   86.09   11.40
  -3 -12   1   84.09   11.60
  -3 -12   1   41.50   11.10
  -3 -12   1   81.29   13.60
  -3 -12   1   67.69   14.90
   2  12  -1  264.47   30.90
   2  12  -1  301.77   24.70
   2  12  -1  335.07   40.30
   2  12  -1  296.27   26.00
   2  12  -1  327.67   27.40
   2  12  -1  323.37   28.10
   2  12  -1  284.37   26.80
   2  12  -1  314.57   27.60
   2  12  -1  292.27   26.10
  -2 -12   1  305.77   29.00
  -2 -12   1  337.67   31.00
  -2 -12   1  315.77   27.20
  -2 -12   1  360.96   28.50
  -2 -12   1  275.17   24.60
  -2 -12   1  319.07   25.20
  -2 -12   1  321.67   28.40
  -2 -12   1  309.57   27.70
  -2 -12   1  273.07   26.90
  -2 -12   1  285.27   23.70
  -2 -12   1  283.67   28.50
   1  12  -1  884.81   67.99
   1  12  -1  934.11   73.19
   1  12  -1 1003.60   71.99
   1  12  -1  995.30   69.89
   1  12  -1  957.60   71.19
   1  12  -1 1041.70   70.79
   1  12  -1 1057.69   70.89
   1  12  -1  971.40   79.29
   1  12  -1 1010.30   72.09
  -1 -12   1  899.71   67.89
  -1 -12   1  934.91   72.19
  -1 -12   1  970.00   70.59
  -1 -12   1 1009.50   71.19
  -1 -12   1 1015.30   67.29
  -1 -12   1  951.20   71.99
  -1 -12   1  948.41   72.49
  -1 -12   1  991.20   71.79
  -1 -12   1  935.41   70.49
   0  12  -1    0.70    1.80
   0  12  -1    3.50    5.10
   0  12  -1   32.10    7.50
   0  12  -1    5.70    5.10
   0  12  -1    3.70    7.30
   0  12  -1    8.40    6.70
   0  12  -1    3.90    4.20
   0  12  -1   22.20    7.30
   0  12  -1   10.00    6.50
   0 -12   1    8.30    7.10
   0 -12   1   -0.10    4.90
   0 -12   1    5.50    6.00
   0 -12   1    7.50    5.50
   0 -12   1   18.50    4.70
   0 -12   1    7.20    4.90
   0 -12   1   16.60    7.30
   0 -12   1   16.20    6.60
   0 -12   1    1.20    3.10
  -1  12  -1  120.49   22.90
  -1  12  -1  108.49   18.30
  -1  12  -1  122.69   17.40
  -1  12  -1  153.78   20.10
  -1  12  -1  141.59   16.00
  -1  12  -1  109.69   18.30
  -1  12  -1  118.09   17.10
  -1  12  -1  155.38   17.30
  -1  12  -1  112.99   15.50
   1 -12   1  141.39   16.60
   1 -12   1  131.19   17.40
   1 -12   1  117.89   18.10
   1 -12   1  154.18   18.00
   1 -12   1  131.89   14.90
   1 -12   1  132.29   19.80
   1 -12   1  140.49   17.20
   1 -12   1  138.39   12.30
   1 -12   1  137.39   12.70
  -2  12  -1    0.80    3.10
  -2  12  -1    2.00    5.30
  -2  12  -1    2.80    3.60
  -2  12  -1   -1.50    6.40
  -2  12  -1   -2.80    3.60
  -2  12  -1    9.40    6.20
  -2  12  -1    0.80    3.30
  -2  12  -1    1.00    4.50
  -2  12  -1   -0.90    6.00
  -2  12  -1    1.20    3.10
   2 -12   1    3.80    3.70
   2 -12   1   -0.90    4.30
   2 -12   1    3.10    4.30
   2 -12   1    2.30    4.10
   2 -12   1    0.40    2.80
   2 -12   1    0.20    5.10
   2 -12   1   -2.90    2.00
  -3  12  -1  185.38   27.90
  -3  12  -1  234.88   24.70
  -3  12  -1  250.87   25.60
  -3  12  -1  195.68   24.30
  -3  12  -1  295.57   33.50
  -3  12  -1  235.38   34.80
  -3  12  -1  262.57   26.90
   3 -12   1  262.97   24.50
   3 -12   1  228.88   25.70
   3 -12   1  243.78   30.40
   3 -12   1  266.67   19.70
  -4  12  -1  255.87   27.00
  -4  12  -1  277.67   32.90
  -4  12  -1  212.88   34.70
  -4  12  -1  264.17   27.00
  -4  12  -1  219.28   30.40
  -4  12  -1  264.27   25.90
   4 -12   1  236.08   26.00
   4 -12   1  221.48   23.00
   4 -12   1  223.18   30.30
  -5  12  -1    8.00    6.10
  -5  12  -1   -1.50    4.70
  -5  12  -1    4.60    7.10
  -5  12  -1    6.50    8.30
   5 -12   1    7.40    6.00
   5 -12   1    4.50    5.30
   5 -12   1   -0.50    6.90
  -6  12  -1  404.96   40.60
  -6  12  -1  440.16   39.80
  -6  12  -1  357.36   42.70
  -6  12  -1  387.86   34.80
   6 -12   1  367.96   29.10
   6 -12   1  376.56   33.80
  -7  12  -1   65.39   18.50
  -7  12  -1  124.59   23.30
  -7  12  -1   69.79   17.90
  -8  12  -1    4.00    9.00
  -8  12  -1   -5.00    9.20
  -8  12  -1   -1.90    9.00
  -9  12  -1  124.79   27.00
  -9  12  -1   77.29   20.20
  -9  12  -1  106.49   24.60
  15  11  -1  107.79   18.70
 -15 -11   1  101.29   29.30
 -15 -11   1   86.99   25.40
  14  11  -1   46.80   13.80
 -14 -11   1    3.20   12.60
 -14 -11   1   20.60   15.40
  13  11  -1  159.38   24.50
 -13 -11   1  160.78   31.60
 -13 -11   1  118.19   24.00
 -13 -11   1  136.09   28.40
  12  11  -1  210.98   25.10
  12  11  -1  205.78   24.90
 -12 -11   1  171.08   24.30
 -12 -11   1  169.98   30.30
 -12 -11   1  182.48   32.80
  11  11  -1   29.80    9.30
  11  11  -1   25.60    9.40
 -11 -11   1    5.40    6.00
 -11 -11   1   22.90   12.30
 -11 -11   1    8.60   10.20
  10  11  -1    0.90    5.30
  10  11  -1    8.70    5.40
 -10 -11   1    9.20    9.10
 -10 -11   1   16.50   10.20
 -10 -11   1    5.50    5.70
   9  11  -1  254.37   24.70
   9  11  -1  268.47   30.00
  -9 -11   1  266.97   25.30
  -9 -11   1  275.77   34.00
  -9 -11   1  232.68   32.10
  -9 -11   1  292.87   35.80
   8  11  -1   65.89   11.70
   8  11  -1   63.59   16.40
   8  11  -1   86.69   10.40
   8  11  -1  105.09   16.20
   8  11  -1   61.49   12.90
   8  11  -1   55.49   10.90
  -8 -11   1   58.59   14.80
  -8 -11   1   59.39   15.50
  -8 -11   1   60.79   10.20
  -8 -11   1   94.59   20.70
  -8 -11   1   81.19   14.30
  -8 -11   1   63.69   11.90
   7  11  -1  493.85   39.30
   7  11  -1  474.65   47.10
   7  11  -1  480.15   39.40
   7  11  -1  459.75   39.30
   7  11  -1  525.95   37.60
   7  11  -1  551.14   42.50
   7  11  -1  480.35   41.60
  -7 -11   1  542.45   38.30
  -7 -11   1  488.05   40.20
  -7 -11   1  513.05   43.70
  -7 -11   1  505.25   38.40
  -7 -11   1  520.45   39.90
  -7 -11   1  467.45   44.00
  -7 -11   1  551.14   49.90
  -7 -11   1  485.55   41.50
   6  11  -1  124.49   23.50
   6  11  -1  182.88   17.60
   6  11  -1  148.69   18.30
   6  11  -1  157.78   16.80
   6  11  -1  183.78   22.00
   6  11  -1  165.58   20.50
   6  11  -1  181.58   19.10
  -6 -11   1  169.98   22.30
  -6 -11   1  153.58   25.80
  -6 -11   1  152.58   18.30
  -6 -11   1  116.89   20.30
  -6 -11   1  164.08   17.20
  -6 -11   1  182.78   17.50
  -6 -11   1  141.29   18.60
  -6 -11   1  184.08   21.40
   5  11  -1  401.06   34.00
   5  11  -1  397.66   31.90
   5  11  -1  353.66   31.30
   5  11  -1  399.56   30.90
   5  11  -1  374.76   33.00
   5  11  -1  437.76   32.00
   5  11  -1  306.87   41.00
   5  11  -1  387.76   33.20
  -5 -11   1  408.16   30.70
  -5 -11   1  423.66   34.90
  -5 -11   1  362.06   37.80
  -5 -11   1  394.56   29.90
  -5 -11   1  335.17   34.00
  -5 -11   1  407.96   30.40
  -5 -11   1  384.86   31.20
  -5 -11   1  395.56   32.60
   4  11  -1   49.60   10.00
   4  11  -1   32.60    7.50
   4  11  -1   39.50    8.20
   4  11  -1   30.20    2.70
   4  11  -1   52.19   10.20
   4  11  -1   33.50    7.80
   4  11  -1   44.30    8.30
   4  11  -1   29.20    8.50
   4  11  -1   28.10   11.00
   4  11  -1   39.80    2.70
  -4 -11   1   42.50    7.70
  -4 -11   1   45.90    8.30
  -4 -11   1   24.10    8.70
  -4 -11   1   32.90    7.10
  -4 -11   1   40.20    6.90
  -4 -11   1   43.30   10.30
  -4 -11   1   43.60    8.00
  -4 -11   1   39.00   12.00
   3  11  -1  238.08   33.10
   3  11  -1  296.07   23.50
   3  11  -1  288.97   23.70
   3  11  -1  230.78   22.80
   3  11  -1  281.17   23.10
   3  11  -1  312.37   25.40
   3  11  -1  234.88   27.10
   3  11  -1  295.87   24.60
  -3 -11   1  280.57   24.70
  -3 -11   1  278.47   22.60
  -3 -11   1  241.58   20.90
  -3 -11   1  246.18   23.40
  -3 -11   1  234.48   26.60
  -3 -11   1  248.98   21.70
  -3 -11   1  265.97   25.70
  -3 -11   1  269.77   27.70
  -3 -11   1  285.57   23.60
  -3 -11   1  245.48   24.40
  -3 -11   1  219.88   21.60
   2  11  -1  432.86   35.90
   2  11  -1  530.75   36.70
   2  11  -1  438.06   43.40
   2  11  -1  378.06   37.50
   2  11  -1  465.65   37.70
   2  11  -1  494.75   37.40
   2  11  -1  516.55   35.20
   2  11  -1  513.35   37.80
   2  11  -1  485.25   37.30
  -2 -11   1  543.65   40.20
  -2 -11   1  481.75   35.20
  -2 -11   1  409.46   38.10
  -2 -11   1  455.65   35.20
  -2 -11   1  422.96   37.00
  -2 -11   1  458.75   37.60
  -2 -11   1  446.86   34.00
  -2 -11   1  527.95   41.60
  -2 -11   1  412.66   36.40
  -2 -11   1  495.25   38.00
  -2 -11   1  465.45   37.20
  -2 -11   1  441.06   37.70
   1  11  -1    7.80    5.20
   1  11  -1    1.30    3.50
   1  11  -1    7.50    4.60
   1  11  -1    0.00    1.70
   1  11  -1    3.10    4.30
   1  11  -1    8.10    7.60
   1  11  -1    0.00    3.50
   1  11  -1    9.90    5.30
   1  11  -1    5.20    4.40
  -1 -11   1    0.30    3.50
  -1 -11   1    5.00    5.50
  -1 -11   1   12.70    5.10
  -1 -11   1    2.60    4.30
  -1 -11   1    0.40    2.70
  -1 -11   1    8.80    6.70
  -1 -11   1    2.50    4.80
  -1 -11   1   15.00    6.30
  -1 -11   1   10.20    4.40
  -1 -11   1    2.60    2.60
  -1 -11   1   -2.50    4.10
   0  11  -1   78.89   11.90
   0  11  -1   97.09   14.60
   0  11  -1   57.19   15.30
   0  11  -1   77.19   14.00
   0  11  -1   69.89   11.70
   0  11  -1   81.39   13.00
   0  11  -1   85.29   13.00
   0  11  -1   85.19   11.70
   0 -11   1   80.39   11.90
   0 -11   1   78.09   12.40
   0 -11   1   76.79    9.20
   0 -11   1   94.09   10.90
   0 -11   1   69.09   12.80
   0 -11   1   88.89   12.60
   0 -11   1   89.79   14.10
   0 -11   1   65.59   13.20
   0 -11   1   64.99   12.30
   0 -11   1   68.79   11.70
  -1  11  -1  442.16   34.30
  -1  11  -1  370.26   34.40
  -1  11  -1  404.96   34.60
  -1  11  -1  390.86   31.10
  -1  11  -1  426.96   33.20
  -1  11  -1  416.56   31.70
  -1  11  -1  336.87   41.70
  -1  11  -1  418.46   30.70
  -1  11  -1  345.77   32.10
   1 -11   1  395.16   28.70
   1 -11   1  330.87   31.70
   1 -11   1  399.16   32.10
   1 -11   1  421.76   31.90
   1 -11   1  394.16   30.90
   1 -11   1  355.46   29.00
   1 -11   1  382.56   32.40
   1 -11   1  387.26   34.30
   1 -11   1  369.96   33.10
  -2  11  -1    9.20    4.90
  -2  11  -1   13.70    4.90
  -2  11  -1   15.50    5.30
  -2  11  -1   31.20   11.40
  -2  11  -1    0.70    5.40
  -2  11  -1   14.90    5.30
  -2  11  -1    9.60    6.20
  -2  11  -1   13.60    7.20
  -2  11  -1   -0.10    6.20
  -2  11  -1   -0.30    2.50
   2 -11   1    4.50    4.70
   2 -11   1    2.80    5.10
   2 -11   1    2.70    5.40
   2 -11   1   14.50    4.90
   2 -11   1    8.70    4.90
   2 -11   1   12.10    3.70
   2 -11   1   11.10    5.50
   2 -11   1   10.20    5.20
   2 -11   1    7.00    3.20
  -3  11  -1  409.16   32.90
  -3  11  -1  406.16   37.10
  -3  11  -1  378.36   45.40
  -3  11  -1  390.56   35.50
  -3  11  -1  418.96   36.80
  -3  11  -1  388.36   37.00
  -3  11  -1  388.46   31.80
  -3  11  -1  421.86   32.30
  -3  11  -1  403.96   33.60
   3 -11   1  420.16   37.70
   3 -11   1  430.56   30.90
   3 -11   1  399.96   34.40
   3 -11   1  424.06   29.20
   3 -11   1  393.36   34.20
   3 -11   1  395.16   28.80
   3 -11   1  383.26   33.40
  -4  11  -1   32.50    7.90
  -4  11  -1   38.90    7.90
  -4  11  -1   25.60   10.10
  -4  11  -1   22.90    7.70
  -4  11  -1   27.00   12.50
  -4  11  -1   30.60   10.00
  -4  11  -1   29.30   12.30
  -4  11  -1   26.90   11.20
  -4  11  -1   32.20   10.90
   4 -11   1   20.70    6.80
   4 -11   1   17.90    9.30
   4 -11   1   31.00    8.30
  -5  11  -1  729.03   66.79
  -5  11  -1  792.82   63.59
  -5  11  -1  876.51   59.59
  -5  11  -1  713.93   56.49
  -5  11  -1  808.42   62.59
  -5  11  -1  678.43   61.19
   5 -11   1  812.12   57.49
   5 -11   1  721.93   62.99
   5 -11   1  716.13   57.09
  -6  11  -1   -0.30    6.90
  -6  11  -1    1.90    7.40
  -6  11  -1   -3.50    5.00
  -6  11  -1    4.00    5.60
   6 -11   1    7.50    5.70
   6 -11   1    2.70    4.60
   6 -11   1   10.80    8.90
  -7  11  -1   43.00   16.00
  -7  11  -1   22.60   10.40
  -7  11  -1   10.90    7.20
  -7  11  -1   38.20   13.60
   7 -11   1   23.40    8.40
  -8  11  -1   81.79   19.60
  -8  11  -1   60.09   16.30
  -8  11  -1   82.39   21.50
  -9  11  -1   -0.20    7.70
  -9  11  -1  -12.40    8.00
  -9  11  -1    1.40   10.80
  15  10  -1   92.19   16.90
 -15 -10   1   83.89   25.90
 -15 -10   1   81.99   26.00
  14  10  -1   37.10   11.80
 -14 -10   1   26.20   16.60
 -14 -10   1   15.10   13.20
  13  10  -1  250.47   30.60
 -13 -10   1  231.98   38.50
 -13 -10   1  233.38   37.00
  12  10  -1    2.10    5.60
 -12 -10   1    3.50    6.00
 -12 -10   1  -10.00    7.70
 -12 -10   1   -0.70    7.50
  11  10  -1  242.48   24.10
  11  10  -1  246.78   24.60
 -11 -10   1  194.48   32.70
 -11 -10   1  201.48   32.10
 -11 -10   1  236.88   27.60
  10  10  -1  318.77   30.10
  10  10  -1  364.96   32.20
 -10 -10   1  352.86   31.40
 -10 -10   1  310.67   40.20
 -10 -10   1  349.47   36.10
   9  10  -1   -2.80    2.80
   9  10  -1    2.30    7.40
  -9 -10   1   -3.50    7.20
  -9 -10   1    4.90    7.80
  -9 -10   1   -0.60    3.90
  -9 -10   1   -0.60    3.50
  -9 -10   1    2.70    4.80
  -9 -10   1   -1.40    6.60
   8  10  -1  562.94   41.70
   8  10  -1  599.74   47.10
   8  10  -1  594.14   52.19
   8  10  -1  530.15   44.30
   8  10  -1  636.84   47.50
   8  10  -1  605.74   44.60
  -8 -10   1  518.65   52.79
  -8 -10   1  582.04   47.10
  -8 -10   1  552.94   48.70
  -8 -10   1  575.94   43.20
  -8 -10   1  577.44   45.10
  -8 -10   1  546.85   49.70
  -8 -10   1  650.13   48.20
   7  10  -1  236.98   21.60
   7  10  -1  209.18   21.10
   7  10  -1  255.07   23.70
   7  10  -1  221.28   30.80
   7  10  -1  242.08   26.50
   7  10  -1  228.08   29.70
   7  10  -1  252.57   19.80
  -7 -10   1  215.08   31.90
  -7 -10   1  251.97   23.90
  -7 -10   1  217.28   28.60
  -7 -10   1  226.18   20.50
  -7 -10   1  252.47   25.70
  -7 -10   1  230.38   21.80
  -7 -10   1  246.68   22.50
   6  10  -1  139.99   15.50
   6  10  -1  143.39   15.40
   6  10  -1  157.48   19.10
   6  10  -1  139.89   23.70
   6  10  -1  159.78   17.40
   6  10  -1  158.98   15.80
   6  10  -1  182.88   21.20
   6  10  -1  153.08   19.50
  -6 -10   1  156.78   21.00
  -6 -10   1  149.99   17.40
  -6 -10   1  156.88   19.20
  -6 -10   1  136.19   17.50
  -6 -10   1  147.79   16.20
  -6 -10   1  144.49   21.30
  -6 -10   1  160.48   25.20
  -6 -10   1  153.48   15.70
   5  10  -1  166.98   19.10
   5  10  -1  112.49   14.10
   5  10  -1  134.49   16.30
   5  10  -1  157.58   16.80
   5  10  -1  160.38   15.30
   5  10  -1  131.19   22.40
   5  10  -1  135.69   17.80
   5  10  -1  152.68   18.70
  -5 -10   1  125.59   19.10
  -5 -10   1  117.89   14.60
  -5 -10   1  165.68   17.10
  -5 -10   1  151.88   13.50
  -5 -10   1  127.99   16.80
  -5 -10   1  137.69   14.40
  -5 -10   1  110.89   20.40
  -5 -10   1  161.58   20.10
   4  10  -1   28.90    7.50
   4  10  -1   30.10    7.20
   4  10  -1   13.20    5.10
   4  10  -1   29.10    6.80
   4  10  -1   22.10    7.20
   4  10  -1   19.40    9.60
   4  10  -1   23.70    6.30
   4  10  -1   20.30    7.00
  -4 -10   1   25.40    6.00
  -4 -10   1   25.50    5.40
  -4 -10   1   22.00    9.10
  -4 -10   1   22.90    7.70
  -4 -10   1   19.90    5.40
  -4 -10   1   17.80    5.50
  -4 -10   1   23.30    8.00
  -4 -10   1   23.60    6.90
   3  10  -1  550.44   41.30
   3  10  -1  492.45   46.40
   3  10  -1  507.15   39.80
   3  10  -1  526.95   41.30
   3  10  -1  485.25   39.80
   3  10  -1  505.05   39.60
   3  10  -1  571.94   40.00
   3  10  -1  569.94   42.60
  -3 -10   1  516.55   38.80
  -3 -10   1  584.04   41.60
  -3 -10   1  521.15   39.80
  -3 -10   1  539.85   43.10
  -3 -10   1  502.15   41.40
  -3 -10   1  521.75   39.10
  -3 -10   1  563.64   42.20
  -3 -10   1  572.34   38.50
  -3 -10   1  462.55   38.80
  -3 -10   1  564.44   45.60
   2  10  -1  191.98   16.20
   2  10  -1  157.88   18.40
   2  10  -1  176.08   16.50
   2  10  -1  129.29   16.70
   2  10  -1  143.89   18.90
   2  10  -1  154.98   18.00
   2  10  -1  166.88   15.80
   2  10  -1  168.38   14.60
   2  10  -1  164.28   24.00
  -2 -10   1  158.88   17.90
  -2 -10   1  160.48   17.00
  -2 -10   1  162.08   15.00
  -2 -10   1  153.78   14.90
  -2 -10   1  167.38   21.80
  -2 -10   1  172.98   14.30
  -2 -10   1  152.28   18.10
  -2 -10   1  144.29   18.50
  -2 -10   1  186.28   18.70
  -2 -10   1  152.68   16.30
  -2 -10   1  167.08   15.10
   1  10  -1  383.56   28.80
   1  10  -1  370.06   28.00
   1  10  -1  333.47   28.80
   1  10  -1  362.96   28.20
   1  10  -1  344.47   28.60
   1  10  -1  315.07   33.60
   1  10  -1  307.97   28.60
   1  10  -1  274.97   28.90
  -1 -10   1  364.06   30.30
  -1 -10   1  311.57   28.60
  -1 -10   1  356.26   28.80
  -1 -10   1  361.26   26.00
  -1 -10   1  341.07   28.90
  -1 -10   1  316.47   26.50
  -1 -10   1  393.96   28.20
  -1 -10   1  401.36   32.30
  -1 -10   1  346.37   29.00
  -1 -10   1  355.76   27.00
  -1 -10   1  303.77   28.40
  -1 -10   1  352.86   30.60
   0  10  -1  136.99   15.10
   0  10  -1  143.99   16.90
   0  10  -1  123.59   16.60
   0  10  -1  113.79   12.80
   0  10  -1  101.09   19.00
   0  10  -1  102.89   16.00
   0  10  -1  125.19   14.30
   0  10  -1  115.39   14.80
   0  10  -1  144.09   16.50
   0 -10   1  133.89   14.10
   0 -10   1  146.29   14.20
   0 -10   1  110.39   14.10
   0 -10   1  127.79   17.20
   0 -10   1   99.79   12.30
   0 -10   1  114.99   16.10
   0 -10   1  100.49   15.30
   0 -10   1   99.09   13.80
   0 -10   1  129.89   15.50
   0 -10   1  117.89   17.00
   0 -10   1  109.99   15.00
   0 -10   1  139.49   11.40
  -1  10  -1  163.98   16.30
  -1  10  -1  178.78   20.00
  -1  10  -1  177.18   17.20
  -1  10  -1  135.79   21.90
  -1  10  -1  129.29   18.70
  -1  10  -1  138.29   16.00
  -1  10  -1  136.79   15.70
  -1  10  -1  153.08   15.50
  -1  10  -1  123.39   18.10
   1 -10   1  150.28   18.60
   1 -10   1  180.18   20.00
   1 -10   1  116.29   15.50
   1 -10   1  149.29   15.30
   1 -10   1  134.39   18.00
   1 -10   1  146.29   12.70
   1 -10   1  114.89   17.30
   1 -10   1  132.39   16.50
   1 -10   1  127.79   15.40
   1 -10   1  156.08   13.50
  -2  10  -1  330.67   31.60
  -2  10  -1  273.07   36.80
  -2  10  -1  376.46   28.90
  -2  10  -1  358.86   29.70
  -2  10  -1  349.37   32.30
  -2  10  -1  390.96   32.00
  -2  10  -1  363.86   32.90
  -2  10  -1  362.66   29.10
  -2  10  -1  417.96   30.10
   2 -10   1  393.76   31.80
   2 -10   1  372.16   30.10
   2 -10   1  379.86   27.20
   2 -10   1  329.47   29.70
   2 -10   1  390.16   28.80
   2 -10   1  373.66   32.80
   2 -10   1  342.07   29.60
   2 -10   1  363.16   27.50
   2 -10   1  390.06   29.70
  -3  10  -1   11.70    8.40
  -3  10  -1   32.50    6.50
  -3  10  -1   28.10    7.80
  -3  10  -1   27.70    8.90
  -3  10  -1   22.80    7.90
  -3  10  -1   13.80    8.80
  -3  10  -1   27.80    6.70
  -3  10  -1   16.70    6.60
  -3  10  -1   19.50    8.50
  -3  10  -1   26.80    6.30
   3 -10   1   24.30    5.10
   3 -10   1   13.70    3.80
   3 -10   1   36.20    5.80
   3 -10   1   27.30    6.70
   3 -10   1   24.70    8.90
   3 -10   1   10.60    8.30
   3 -10   1   32.40    6.70
   3 -10   1   28.00    5.70
   3 -10   1   22.80    7.80
   3 -10   1   33.70    5.70
   3 -10   1   22.20    7.20
   3 -10   1   19.20    6.30
  -4  10  -1  155.68   20.90
  -4  10  -1  193.28   24.80
  -4  10  -1  173.18   23.90
  -4  10  -1  169.58   19.20
  -4  10  -1  182.48   24.80
  -4  10  -1  182.38   28.00
  -4  10  -1  196.28   21.10
  -4  10  -1  221.28   27.10
  -4  10  -1  194.78   19.20
   4 -10   1  176.98   13.30
   4 -10   1  170.38   13.10
   4 -10   1  228.18   26.70
   4 -10   1  183.58   21.40
   4 -10   1  163.18   19.30
   4 -10   1  193.08   15.20
  -5  10  -1   52.69   10.30
  -5  10  -1   71.09   12.20
  -5  10  -1   62.39   10.20
  -5  10  -1   77.29   15.70
  -5  10  -1   71.19   17.50
  -5  10  -1   60.29   13.90
  -5  10  -1   71.99   15.40
  -5  10  -1   56.89   15.10
   5 -10   1   66.99   11.90
   5 -10   1   53.49   10.60
   5 -10   1   69.29   15.50
  -6  10  -1    6.40    4.60
  -6  10  -1   -1.40    5.00
  -6  10  -1   -4.50    6.00
  -6  10  -1   -2.20    5.30
  -6  10  -1   -2.20    7.10
  -6  10  -1   -1.90    6.10
   6 -10   1    6.20    5.40
   6 -10   1    5.90    4.50
   6 -10   1    4.90    6.80
  -7  10  -1   96.79   16.70
  -7  10  -1  190.38   28.40
  -7  10  -1  140.59   24.10
  -7  10  -1  106.99   20.40
   7 -10   1   90.29   20.30
   7 -10   1  125.29   13.00
   7 -10   1  113.89   16.30
  -8  10  -1  105.99   17.80
  -8  10  -1  121.89   24.60
  -8  10  -1  112.99   21.10
  -8  10  -1   83.29   20.30
  -9  10  -1   55.59   18.30
  -9  10  -1   75.89   20.60
  -9  10  -1   75.39   17.70
 -10  10  -1   31.40   16.00
 -10  10  -1   51.59   18.50
 -10  10  -1   55.49   16.80
  15   9  -1   19.70    9.00
 -15  -9   1   -8.80   10.30
 -15  -9   1    4.30   12.90
  14   9  -1  334.17   30.20
 -14  -9   1  177.38   35.80
 -14  -9   1  232.48   40.20
  13   9  -1  139.09   21.00
 -13  -9   1   83.39   22.60
 -13  -9   1  100.69   25.30
  12   9  -1    6.70    7.70
  12   9  -1    8.20    5.70
 -12  -9   1   12.30   11.60
 -12  -9   1   -6.30    6.20
 -12  -9   1    2.40    6.20
  11   9  -1  373.86   33.00
 -11  -9   1  368.36   45.60
 -11  -9   1  344.87   38.60
 -11  -9   1  408.56   34.60
  10   9  -1    3.60    4.70
  10   9  -1   -5.40    3.80
 -10  -9   1   -2.00    3.40
 -10  -9   1   -2.40    6.20
 -10  -9   1    2.20    4.80
 -10  -9   1   -0.10    7.30
   9   9  -1  496.65   38.40
   9   9  -1  422.46   42.40
   9   9  -1  531.55   37.70
   9   9  -1  514.35   40.10
  -9  -9   1  375.56   40.60
  -9  -9   1  480.75   44.20
  -9  -9   1  494.15   38.60
  -9  -9   1  446.06   52.39
  -9  -9   1  456.95   40.00
  -9  -9   1  436.36   35.70
   8   9  -1  149.69   18.30
   8   9  -1  185.08   21.40
   8   9  -1  146.89   23.70
   8   9  -1  185.48   18.80
   8   9  -1  157.28   17.90
  -8  -9   1  151.68   16.70
  -8  -9   1  205.38   20.60
  -8  -9   1  102.69   22.20
  -8  -9   1  162.48   22.90
  -8  -9   1  159.08   23.80
  -8  -9   1  152.78   20.40
   7   9  -1  208.38   23.20
   7   9  -1  209.08   20.80
   7   9  -1  184.48   18.20
   7   9  -1  231.48   21.10
   7   9  -1  202.48   16.80
   7   9  -1  218.88   24.40
   7   9  -1  174.88   18.30
   7   9  -1  179.88   26.60
  -7  -9   1  214.88   22.60
  -7  -9   1  189.98   22.60
  -7  -9   1  188.18   25.60
  -7  -9   1  172.18   20.20
  -7  -9   1  200.18   17.90
  -7  -9   1  207.98   19.20
  -7  -9   1  211.78   29.20
   6   9  -1  243.38   20.70
   6   9  -1  219.68   20.50
   6   9  -1  224.88   25.00
   6   9  -1  208.18   24.00
   6   9  -1  241.98   22.30
   6   9  -1  214.58   20.30
   6   9  -1  230.58   19.10
   6   9  -1  197.38   28.70
  -6  -9   1  260.47   21.40
  -6  -9   1  231.58   22.20
  -6  -9   1  198.58   26.10
  -6  -9   1  247.38   20.10
  -6  -9   1  259.77   21.70
  -6  -9   1  212.78   29.50
  -6  -9   1  281.77   24.90
   5   9  -1  467.65   35.10
   5   9  -1  440.66   36.70
   5   9  -1  479.95   35.00
   5   9  -1  425.96   34.70
   5   9  -1  500.55   37.40
   5   9  -1  457.25   35.10
   5   9  -1  371.86   40.00
   5   9  -1  450.15   36.40
   5   9  -1  448.96   33.70
  -5  -9   1  472.75   33.70
  -5  -9   1  501.25   39.40
  -5  -9   1  488.75   36.00
  -5  -9   1  444.86   34.00
  -5  -9   1  431.36   34.70
  -5  -9   1  459.95   37.70
  -5  -9   1  435.96   41.40
   4   9  -1 1067.09   86.69
   4   9  -1 1116.59   80.29
   4   9  -1 1132.49   80.19
   4   9  -1 1186.38   79.69
   4   9  -1 1167.88   81.89
   4   9  -1 1181.58   81.99
   4   9  -1 1121.39   81.99
   4   9  -1 1212.28   80.19
  -4  -9   1 1235.08   79.59
  -4  -9   1 1114.29   82.29
  -4  -9   1 1102.09   86.29
  -4  -9   1 1168.08   78.79
  -4  -9   1 1179.38   79.29
  -4  -9   1 1147.19   79.99
  -4  -9   1 1138.89   80.89
  -4  -9   1 1163.98   83.79
   3   9  -1   61.29   13.90
   3   9  -1   74.99   11.90
   3   9  -1   78.99   11.50
   3   9  -1   69.49   10.20
   3   9  -1   89.99   11.20
   3   9  -1   79.09   10.30
   3   9  -1   75.69   11.30
   3   9  -1   65.59    9.80
  -3  -9   1   68.99   10.60
  -3  -9   1   69.99    9.60
  -3  -9   1   61.79   10.90
  -3  -9   1   77.59   12.40
  -3  -9   1   83.99   11.70
  -3  -9   1   76.19    9.00
  -3  -9   1   81.99   10.40
  -3  -9   1   73.39    9.40
  -3  -9   1   95.39   15.80
  -3  -9   1   70.49   12.50
   2   9  -1  496.95   40.20
   2   9  -1  495.15   38.70
   2   9  -1  513.25   44.70
   2   9  -1  580.24   39.80
   2   9  -1  549.05   38.40
   2   9  -1  553.24   39.30
   2   9  -1  559.34   40.10
   2   9  -1  497.25   38.20
  -2  -9   1  512.85   38.90
  -2  -9   1  488.05   37.40
  -2  -9   1  538.15   43.00
  -2  -9   1  504.65   39.20
  -2  -9   1  510.95   36.90
  -2  -9   1  501.65   39.80
  -2  -9   1  517.75   39.80
  -2  -9   1  507.65   39.40
  -2  -9   1  523.25   38.00
  -2  -9   1  489.05   37.60
  -2  -9   1  509.95   40.90
   1   9  -1  847.92   61.19
   1   9  -1  788.12   61.79
   1   9  -1  879.71   59.79
   1   9  -1  819.42   60.89
   1   9  -1  816.32   60.49
   1   9  -1  802.82   60.09
   1   9  -1  882.21   60.29
   1   9  -1  817.42   66.09
  -1  -9   1  804.92   59.39
  -1  -9   1  862.51   58.19
  -1  -9   1  884.81   61.39
  -1  -9   1  826.72   59.09
  -1  -9   1  972.10   63.49
  -1  -9   1  833.92   60.69
  -1  -9   1  866.71   61.29
  -1  -9   1  859.11   61.19
  -1  -9   1  785.92   60.69
  -1  -9   1  830.52   58.89
  -1  -9   1  903.51   64.09
  -1  -9   1  842.02   62.39
   0   9  -1   10.40    3.50
   0   9  -1   15.50    5.00
   0   9  -1   10.40    4.10
   0   9  -1   10.10    4.50
   0   9  -1    8.60    4.20
   0   9  -1    8.70    6.50
   0   9  -1    1.60    3.80
   0   9  -1    6.50    3.60
   0   9  -1    5.80    4.70
   0  -9   1    7.30    4.30
   0  -9   1    6.50    3.20
   0  -9   1    4.40    3.90
   0  -9   1    8.20    4.20
   0  -9   1    7.70    4.40
   0  -9   1    3.90    3.10
   0  -9   1   17.50    3.90
   0  -9   1   12.90    4.20
   0  -9   1   10.00    5.10
   0  -9   1    4.20    5.00
   0  -9   1    3.90    4.10
   0  -9   1   12.80    4.60
  -1   9  -1  367.46   28.70
  -1   9  -1  331.07   33.80
  -1   9  -1  397.56   30.40
  -1   9  -1  380.96   28.10
  -1   9  -1  329.57   28.50
  -1   9  -1  367.86   28.70
  -1   9  -1  387.06   31.80
  -1   9  -1  355.76   30.60
  -1   9  -1  358.26   31.40
   1  -9   1  345.37   29.20
   1  -9   1  350.66   29.30
   1  -9   1  368.76   27.70
   1  -9   1  380.86   28.10
   1  -9   1  376.56   29.50
   1  -9   1  349.77   30.50
   1  -9   1  392.16   27.00
   1  -9   1  371.86   29.50
   1  -9   1  444.56   32.30
   1  -9   1  320.87   30.60
   1  -9   1  377.26   29.50
   1  -9   1  351.56   30.90
  -2   9  -1  376.46   33.40
  -2   9  -1  416.46   33.40
  -2   9  -1  387.16   36.80
  -2   9  -1  390.86   30.90
  -2   9  -1  392.86   34.00
  -2   9  -1  397.86   30.60
  -2   9  -1  356.36   29.80
  -2   9  -1  410.26   34.60
  -2   9  -1  395.36   31.40
   2  -9   1  408.26   33.10
   2  -9   1  389.66   30.60
   2  -9   1  429.06   31.60
   2  -9   1  432.06   32.70
   2  -9   1  401.36   34.20
   2  -9   1  384.76   29.40
   2  -9   1  405.06   31.70
   2  -9   1  434.36   32.10
   2  -9   1  437.46   33.50
   2  -9   1  366.96   32.00
   2  -9   1  381.86   28.70
  -3   9  -1  348.37   31.70
  -3   9  -1  363.06   28.60
  -3   9  -1  368.76   29.60
  -3   9  -1  363.06   31.80
  -3   9  -1  359.36   27.00
  -3   9  -1  251.37   34.50
  -3   9  -1  320.17   30.10
  -3   9  -1  327.17   30.40
  -3   9  -1  375.66   27.20
  -3   9  -1  365.86   27.70
   3  -9   1  361.56   26.30
   3  -9   1  350.66   27.00
   3  -9   1  262.07   30.60
   3  -9   1  370.06   28.30
   3  -9   1  343.97   25.40
   3  -9   1  360.46   27.40
   3  -9   1  284.37   28.10
   3  -9   1  336.97   25.20
   3  -9   1  326.57   30.80
   3  -9   1  373.76   29.80
   3  -9   1  315.17   27.60
  -4   9  -1  823.12   63.69
  -4   9  -1  848.72   57.99
  -4   9  -1  799.52   59.49
  -4   9  -1  764.12   65.49
  -4   9  -1  815.52   62.89
  -4   9  -1  732.63   61.99
  -4   9  -1  865.11   64.49
  -4   9  -1  825.32   60.99
  -4   9  -1  846.12   58.59
   4  -9   1  841.42   56.99
   4  -9   1  834.32   59.09
   4  -9   1  803.92   55.09
   4  -9   1  705.03   62.09
   4  -9   1  810.22   58.79
   4  -9   1  777.92   57.89
   4  -9   1  786.62   63.19
   4  -9   1  829.92   55.49
   4  -9   1  834.42   60.29
  -5   9  -1  191.48   26.10
  -5   9  -1  135.09   21.90
  -5   9  -1  134.89   20.50
  -5   9  -1  149.79   22.10
  -5   9  -1  147.79   18.20
  -5   9  -1  141.49   19.60
  -5   9  -1  116.89   15.70
  -5   9  -1  156.08   16.60
  -5   9  -1  181.18   26.50
   5  -9   1  162.08   11.60
   5  -9   1  137.49   17.90
   5  -9   1  119.99   20.30
   5  -9   1  165.68   17.90
  -6   9  -1  196.18   30.40
  -6   9  -1  253.17   32.20
  -6   9  -1  238.78   21.10
  -6   9  -1  243.48   25.40
  -6   9  -1  215.38   20.50
  -6   9  -1  249.78   30.90
  -6   9  -1  215.08   27.30
   6  -9   1  218.58   28.70
   6  -9   1  217.48   21.30
   6  -9   1  223.18   21.10
  -7   9  -1   30.50   12.60
  -7   9  -1   42.10    8.60
  -7   9  -1   43.50   12.00
  -7   9  -1   27.40   12.90
  -7   9  -1   48.70   10.90
  -7   9  -1   28.30   13.50
   7  -9   1   45.80    9.10
   7  -9   1   45.90   14.10
   7  -9   1   53.69   10.00
  -8   9  -1  153.18   25.30
  -8   9  -1  176.18   28.60
  -8   9  -1  198.98   32.60
  -8   9  -1  196.68   24.20
   8  -9   1  208.78   16.70
   8  -9   1  180.28   21.30
   8  -9   1  200.18   30.10
  -9   9  -1  218.68   27.90
  -9   9  -1  261.67   38.20
  -9   9  -1  266.27   33.80
  -9   9  -1  253.97   36.40
 -10   9  -1   -3.30   10.80
 -10   9  -1   -1.20    6.60
 -10   9  -1   -1.50    9.10
 -11   9  -1   44.90   19.30
 -11   9  -1   45.40   19.80
  15   8  -1  177.78   20.10
 -15  -8   1  117.29   29.80
 -15  -8   1   99.79   28.40
  14   8  -1   36.50   10.90
 -14  -8   1   43.40   19.20
 -14  -8   1   40.90   17.90
  13   8  -1   35.80   10.50
 -13  -8   1   17.40   12.60
 -13  -8   1   14.80   12.40
  12   8  -1  213.38   20.20
  12   8  -1  223.28   27.30
 -12  -8   1  194.48   31.80
 -12  -8   1  159.78   30.80
  11   8  -1    7.80    5.60
 -11  -8   1    8.20    6.30
 -11  -8   1    1.90    8.00
 -11  -8   1    4.80    8.50
  10   8  -1   53.59   10.70
  10   8  -1   57.79   11.30
 -10  -8   1   32.00    9.10
 -10  -8   1   31.90   12.80
 -10  -8   1   58.59   12.30
 -10  -8   1   58.69   10.90
 -10  -8   1   46.30   17.00
 -10  -8   1   48.40   14.20
   9   8  -1  119.79   17.30
   9   8  -1  140.19   21.50
   9   8  -1  159.18   16.90
   9   8  -1  107.79   15.80
  -9  -8   1  128.49   21.60
  -9  -8   1  120.99   14.50
  -9  -8   1  140.19   25.10
  -9  -8   1  121.69   17.90
  -9  -8   1  128.79   21.00
  -9  -8   1  130.39   17.20
   8   8  -1  161.98   17.80
   8   8  -1  176.88   21.00
   8   8  -1  200.98   23.00
   8   8  -1  176.48   24.50
   8   8  -1  187.58   16.60
   8   8  -1  167.58   17.00
  -8  -8   1  156.68   23.60
  -8  -8   1  148.89   18.30
  -8  -8   1  165.88   22.90
  -8  -8   1  138.39   19.30
  -8  -8   1  160.78   12.40
  -8  -8   1  154.98   16.80
  -8  -8   1  169.58   27.10
   7   8  -1  386.36   28.50
   7   8  -1  351.36   30.00
   7   8  -1  308.77   32.80
   7   8  -1  366.16   28.20
   7   8  -1  416.36   32.20
   7   8  -1  343.47   28.40
  -7  -8   1  357.66   23.30
  -7  -8   1  372.36   27.70
  -7  -8   1  317.97   32.10
  -7  -8   1  346.17   28.70
  -7  -8   1  281.77   37.90
  -7  -8   1  354.06   32.10
  -7  -8   1  278.37   29.00
   6   8  -1   36.20    8.40
   6   8  -1   36.80    7.30
   6   8  -1   56.59    8.60
   6   8  -1   61.19   10.60
   6   8  -1   33.50   10.70
   6   8  -1   41.70    6.50
   6   8  -1   40.60    7.60
  -6  -8   1   48.30   10.50
  -6  -8   1   51.09    8.80
  -6  -8   1   41.60    7.30
  -6  -8   1   50.29   11.30
  -6  -8   1   41.20    8.10
  -6  -8   1   42.60    9.00
  -6  -8   1   49.80   12.80
   5   8  -1  306.37   25.80
   5   8  -1  246.18   32.20
   5   8  -1  339.07   27.90
   5   8  -1  317.17   25.90
   5   8  -1  380.06   28.20
   5   8  -1  319.17   25.60
   5   8  -1  311.87   24.50
   5   8  -1  351.06   26.20
   5   8  -1  307.77   27.10
  -5  -8   1  336.87   25.30
  -5  -8   1  333.07   26.10
  -5  -8   1  350.46   26.70
  -5  -8   1  298.27   26.90
  -5  -8   1  343.67   32.80
  -5  -8   1  320.47   29.20
  -5  -8   1  315.27   28.10
   4   8  -1   20.80    5.10
   4   8  -1   13.30    4.70
   4   8  -1   16.10    5.50
   4   8  -1   14.10    7.20
   4   8  -1   16.60    4.80
   4   8  -1   12.00    5.00
   4   8  -1   21.00    5.20
   4   8  -1   19.70    4.70
   4   8  -1   19.40    5.00
  -4  -8   1   11.00    6.60
  -4  -8   1   17.50    4.80
  -4  -8   1   17.90    5.50
  -4  -8   1   19.50    4.10
  -4  -8   1   22.70    7.00
  -4  -8   1   12.40    4.00
  -4  -8   1   30.10    8.20
  -4  -8   1   20.30    4.40
   3   8  -1   91.09   11.30
   3   8  -1   84.99   12.30
   3   8  -1   85.99   11.10
   3   8  -1   79.59   11.40
   3   8  -1  118.69   11.90
   3   8  -1   98.39   12.70
   3   8  -1   98.59   16.50
   3   8  -1   97.49   11.40
  -3  -8   1   99.29   10.70
  -3  -8   1   94.09    9.90
  -3  -8   1  102.19   12.60
  -3  -8   1  104.59   16.00
  -3  -8   1   85.39   12.80
  -3  -8   1   93.59   10.60
  -3  -8   1   91.19   10.90
  -3  -8   1   88.79   11.80
  -3  -8   1   97.99   14.20
  -3  -8   1   74.19   11.80
   2   8  -1  220.28   19.80
   2   8  -1  240.28   18.40
   2   8  -1  206.78   18.00
   2   8  -1  219.08   19.20
   2   8  -1  205.48   18.80
   2   8  -1  231.78   18.90
   2   8  -1  219.18   18.50
   2   8  -1  196.38   25.00
  -2  -8   1  224.98   17.70
  -2  -8   1  214.98   16.90
  -2  -8   1  203.78   19.20
  -2  -8   1  232.98   19.30
  -2  -8   1  205.08   21.70
  -2  -8   1  210.58   20.20
  -2  -8   1  237.68   18.20
  -2  -8   1  195.98   18.00
  -2  -8   1  216.88   19.60
  -2  -8   1  192.88   17.30
   1   8  -1   35.90    6.70
   1   8  -1   28.80    5.90
   1   8  -1   16.00    7.00
   1   8  -1   23.30    5.80
   1   8  -1   31.60    5.80
   1   8  -1   28.40    5.80
   1   8  -1   27.30    6.20
   1   8  -1   23.80    6.50
  -1  -8   1   19.50    6.40
  -1  -8   1   25.90    5.90
  -1  -8   1   24.10    5.10
  -1  -8   1   31.20    6.80
  -1  -8   1   25.30    6.80
  -1  -8   1   31.40    6.40
  -1  -8   1   24.20    5.00
  -1  -8   1   33.50    4.90
  -1  -8   1   28.50    6.40
  -1  -8   1   27.20    5.20
  -1  -8   1   22.20    6.10
   0   8  -1  226.18   18.30
   0   8  -1  225.58   19.40
   0   8  -1  219.08   19.40
   0   8  -1  191.58   19.30
   0   8  -1  210.68   17.30
   0   8  -1  230.88   18.70
   0   8  -1  169.78   21.00
   0   8  -1  243.58   23.80
   0   8  -1  220.58   18.90
   0  -8   1  222.38   20.30
   0  -8   1  248.08   21.50
   0  -8   1  218.58   19.30
   0  -8   1  209.58   18.80
   0  -8   1  225.78   18.50
   0  -8   1  220.38   19.00
   0  -8   1  220.58   17.80
   0  -8   1  212.88   20.80
   0  -8   1  204.68   19.30
   0  -8   1  207.08   19.50
   0  -8   1  208.38   17.60
   0  -8   1  220.48   16.90
  -1   8  -1   44.00    9.20
  -1   8  -1   55.69   12.00
  -1   8  -1   54.39   10.20
  -1   8  -1   42.40    8.90
  -1   8  -1   52.09    7.30
  -1   8  -1   53.99    7.80
  -1   8  -1   53.99    8.00
  -1   8  -1   44.60    8.50
  -1   8  -1   54.49    7.90
   1  -8   1   41.50    7.40
   1  -8   1   42.50    6.70
   1  -8   1   56.49   10.00
   1  -8   1   39.50    9.50
   1  -8   1   44.10    8.20
   1  -8   1   62.79   10.10
   1  -8   1   47.60    8.00
   1  -8   1   47.70    7.90
   1  -8   1   53.59    7.50
   1  -8   1   49.90    9.20
   1  -8   1   46.80    8.40
   1  -8   1   58.39    6.50
  -2   8  -1  251.87   20.30
  -2   8  -1  269.87   22.80
  -2   8  -1  268.77   21.00
  -2   8  -1  238.78   25.70
  -2   8  -1  239.48   19.40
  -2   8  -1  234.78   19.70
  -2   8  -1  286.07   23.80
  -2   8  -1  195.68   23.70
  -2   8  -1  233.68   27.80
   2  -8   1  237.88   22.80
   2  -8   1  212.68   20.20
   2  -8   1  211.38   21.40
   2  -8   1  266.57   21.00
   2  -8   1  215.28   21.40
   2  -8   1  266.07   20.70
   2  -8   1  228.28   21.10
   2  -8   1  240.38   18.40
   2  -8   1  264.47   22.50
   2  -8   1  230.78   18.90
   2  -8   1  227.38   20.30
   2  -8   1  244.48   19.60
  -3   8  -1  536.35   37.30
  -3   8  -1  535.95   38.10
  -3   8  -1  501.95   41.30
  -3   8  -1  483.25   36.20
  -3   8  -1  527.85   39.00
  -3   8  -1  511.55   41.20
  -3   8  -1  431.66   41.80
  -3   8  -1  508.85   40.50
  -3   8  -1  539.35   40.90
   3  -8   1  444.36   38.30
   3  -8   1  546.45   37.80
   3  -8   1  390.86   37.90
   3  -8   1  533.15   37.40
   3  -8   1  524.35   35.20
   3  -8   1  531.15   37.80
   3  -8   1  420.86   39.70
   3  -8   1  478.55   35.30
   3  -8   1  464.55   37.30
   3  -8   1  512.35   38.90
   3  -8   1  580.84   39.90
   3  -8   1  506.85   36.30
   3  -8   1  389.46   40.20
  -4   8  -1   14.40    7.30
  -4   8  -1   16.80    4.80
  -4   8  -1    3.20    4.00
  -4   8  -1    7.30    4.00
  -4   8  -1   11.70    5.50
  -4   8  -1    9.40    6.60
  -4   8  -1    7.40    4.50
  -4   8  -1   14.30    7.90
  -4   8  -1   10.50    7.10
   4  -8   1   13.60    5.00
   4  -8   1   13.80    3.40
   4  -8   1    9.30    3.70
   4  -8   1    7.10    7.00
   4  -8   1   10.50    3.40
   4  -8   1   16.30    4.00
   4  -8   1   14.30    3.90
   4  -8   1    6.30    4.80
   4  -8   1    5.50    5.00
   4  -8   1   13.60    5.10
   4  -8   1   10.40    6.40
   4  -8   1   15.00    4.80
  -5   8  -1   17.80    5.50
  -5   8  -1   35.00   10.30
  -5   8  -1   28.30    9.00
  -5   8  -1   23.30    9.70
  -5   8  -1   25.00   10.60
  -5   8  -1   38.40    8.20
  -5   8  -1   20.80    6.00
  -5   8  -1   33.10   11.50
  -5   8  -1   29.20    8.30
   5  -8   1   31.50    4.20
   5  -8   1   30.40    4.30
   5  -8   1   35.50    5.90
   5  -8   1   19.20    8.10
   5  -8   1   29.70    6.30
   5  -8   1   29.80    8.20
   5  -8   1   27.40    6.90
   5  -8   1   46.60    8.40
   5  -8   1   33.70   10.30
  -6   8  -1  228.38   30.10
  -6   8  -1  244.78   33.30
  -6   8  -1  263.47   30.10
  -6   8  -1  243.38   22.10
  -6   8  -1  287.77   25.20
  -6   8  -1  249.28   31.40
  -6   8  -1  285.07   23.30
  -6   8  -1  280.07   26.50
  -6   8  -1  255.57   33.10
   6  -8   1  242.68   30.90
   6  -8   1  283.67   24.50
   6  -8   1  260.97   23.10
  -7   8  -1   19.80   10.50
  -7   8  -1   10.90    6.40
  -7   8  -1    5.20    5.80
  -7   8  -1   30.00   11.80
  -7   8  -1   23.10    6.20
  -7   8  -1   21.00   11.90
   7  -8   1   11.00    8.40
   7  -8   1   19.10    6.40
   7  -8   1   13.50    5.50
  -8   8  -1   90.49   21.30
  -8   8  -1  110.99   23.90
  -8   8  -1  132.49   18.40
  -8   8  -1  101.09   21.30
  -8   8  -1  139.89   21.20
   8  -8   1  109.69   13.90
   8  -8   1   91.49   14.00
   8  -8   1  157.38   24.40
  -9   8  -1    0.80    5.80
  -9   8  -1    1.40    9.40
  -9   8  -1    2.40    9.70
  -9   8  -1   -0.80    6.70
   9  -8   1    2.00    5.10
   9  -8   1    5.30    7.70
 -10   8  -1  177.98   30.80
 -10   8  -1  159.28   31.50
 -11   8  -1   47.00   19.30
 -11   8  -1   91.69   24.70
 -15  -7   1   69.89   24.00
 -15  -7   1   70.59   23.60
  14   7  -1    7.00    7.10
 -14  -7   1  -11.70    8.30
 -14  -7   1   -0.70   10.00
  13   7  -1  246.08   27.00
 -13  -7   1  149.69   30.20
 -13  -7   1  217.28   37.20
  12   7  -1   83.49   15.30
 -12  -7   1  130.89   25.50
 -12  -7   1   46.30   16.20
  11   7  -1  487.75   38.90
  11   7  -1  439.76   35.10
 -11  -7   1  424.46   37.60
 -11  -7   1  360.46   41.30
 -11  -7   1  429.86   44.50
 -11  -7   1  445.26   40.20
  10   7  -1   92.79   12.90
  10   7  -1   89.39    7.70
  10   7  -1   76.99   14.90
  10   7  -1   99.19   14.30
 -10  -7   1   84.89   18.20
 -10  -7   1   71.49   18.90
 -10  -7   1   71.99   13.60
 -10  -7   1   82.89   18.90
 -10  -7   1   63.59   13.70
   9   7  -1   73.09   12.50
   9   7  -1   94.09   11.90
   9   7  -1   88.39   13.70
   9   7  -1   93.99    7.80
   9   7  -1  110.29   17.90
   9   7  -1  103.59   13.20
  -9  -7   1   91.59   18.50
  -9  -7   1  110.19   16.40
  -9  -7   1  102.09   21.30
  -9  -7   1   68.09   15.90
  -9  -7   1   92.09   13.60
   8   7  -1 1163.68   86.29
   8   7  -1 1195.58   78.29
   8   7  -1 1117.69   83.49
   8   7  -1 1241.28   82.89
   8   7  -1 1155.08   87.89
   8   7  -1 1314.77   82.99
   8   7  -1 1296.37   85.69
   8   7  -1 1266.57   85.39
  -8  -7   1 1150.48   83.89
  -8  -7   1 1100.19   87.29
  -8  -7   1 1088.29   91.39
  -8  -7   1 1163.38   88.99
  -8  -7   1 1169.78   79.49
  -8  -7   1 1156.98   85.69
   7   7  -1  108.99   13.90
   7   7  -1   98.29   15.00
   7   7  -1  104.89   17.30
   7   7  -1   96.49    7.70
   7   7  -1  128.99   15.70
   7   7  -1  127.09   13.60
   7   7  -1  132.79   14.00
  -7  -7   1  100.29   16.30
  -7  -7   1  112.59    8.70
  -7  -7   1  107.79   14.00
  -7  -7   1   97.69   12.00
  -7  -7   1  102.89   14.70
  -7  -7   1  102.19   17.20
  -7  -7   1  117.19   20.60
   6   7  -1  435.26   32.30
   6   7  -1  422.56   31.70
   6   7  -1  377.76   36.40
   6   7  -1  439.06   31.70
   6   7  -1  417.26   30.10
   6   7  -1  435.56   33.60
   6   7  -1  458.35   34.70
  -6  -7   1  425.96   27.80
  -6  -7   1  431.36   33.10
  -6  -7   1  416.56   35.90
  -6  -7   1  342.57   37.20
  -6  -7   1  398.26   32.00
  -6  -7   1  373.06   30.70
  -6  -7   1  416.36   34.90
  -6  -7   1  394.86   33.30
   5   7  -1  201.98   20.20
   5   7  -1  130.99   20.50
   5   7  -1  171.08   14.20
   5   7  -1  178.08   15.40
   5   7  -1  169.48   15.50
   5   7  -1  157.18   15.30
   5   7  -1  164.78   16.40
  -5  -7   1  198.98   18.50
  -5  -7   1  164.48   16.50
  -5  -7   1  207.88   19.60
  -5  -7   1  180.98   15.80
  -5  -7   1  158.38   14.70
  -5  -7   1  145.89   22.10
  -5  -7   1  199.98   16.20
   4   7  -1   14.30    7.00
   4   7  -1   25.70    6.30
   4   7  -1   24.00    5.90
   4   7  -1   22.60    5.10
   4   7  -1   27.50    5.70
   4   7  -1   19.70    4.40
   4   7  -1   24.30    5.20
   4   7  -1   17.30    5.20
   4   7  -1   23.70    5.20
  -4  -7   1   25.90    4.20
  -4  -7   1   22.80    4.90
  -4  -7   1   30.70    7.70
  -4  -7   1   31.30    5.90
  -4  -7   1   27.80    5.90
  -4  -7   1   28.30    7.10
  -4  -7   1   22.90    8.20
   3   7  -1  861.11   58.09
   3   7  -1  760.02   57.79
   3   7  -1  817.32   52.99
   3   7  -1  866.91   56.69
   3   7  -1  866.71   58.19
   3   7  -1  808.52   56.59
   3   7  -1  781.92   56.69
   3   7  -1  805.62   56.29
   3   7  -1  746.13   61.49
  -3  -7   1  767.92   58.19
  -3  -7   1  787.62   55.99
  -3  -7   1  836.52   56.79
  -3  -7   1  844.32   56.09
  -3  -7   1  852.91   57.49
  -3  -7   1  768.32   58.99
  -3  -7   1  761.72   61.19
  -3  -7   1  848.32   55.69
  -3  -7   1  793.22   57.69
   2   7  -1  460.95   39.00
   2   7  -1  455.15   34.30
   2   7  -1  472.85   34.10
   2   7  -1  511.15   35.40
   2   7  -1  474.65   35.70
   2   7  -1  465.55   34.30
   2   7  -1  489.15   34.10
   2   7  -1  441.76   34.90
  -2  -7   1  432.16   34.60
  -2  -7   1  472.75   35.60
  -2  -7   1  484.15   34.10
  -2  -7   1  454.35   36.20
  -2  -7   1  425.16   34.60
  -2  -7   1  475.75   38.30
  -2  -7   1  462.45   35.30
  -2  -7   1  486.95   34.30
  -2  -7   1  490.25   33.10
  -2  -7   1  452.55   33.50
   1   7  -1  482.55   38.30
   1   7  -1  531.85   38.20
   1   7  -1  505.25   38.70
   1   7  -1  475.85   42.20
   1   7  -1  540.35   39.10
   1   7  -1  537.15   38.70
   1   7  -1  550.24   38.00
   1   7  -1  521.85   39.80
  -1  -7   1  534.45   41.50
  -1  -7   1  557.44   39.60
  -1  -7   1  538.85   37.80
  -1  -7   1  532.15   40.20
  -1  -7   1  562.14   37.10
  -1  -7   1  521.35   38.90
  -1  -7   1  510.55   38.90
  -1  -7   1  532.85   38.80
  -1  -7   1  534.55   37.80
  -1  -7   1  532.25   37.60
   0   7  -1  510.85   36.60
   0   7  -1  499.35   36.40
   0   7  -1  494.95   35.30
   0   7  -1  466.45   39.70
   0   7  -1  476.05   37.30
   0   7  -1  465.45   36.60
   0   7  -1  461.55   34.40
   0   7  -1  481.45   35.50
   0   7  -1  492.75   35.80
   0  -7   1  499.15   38.20
   0  -7   1  460.75   37.00
   0  -7   1  457.85   34.70
   0  -7   1  519.55   34.20
   0  -7   1  462.75   35.80
   0  -7   1  554.44   38.60
   0  -7   1  486.25   34.90
   0  -7   1  485.85   36.10
   0  -7   1  502.05   36.50
   0  -7   1  470.15   36.50
   0  -7   1  482.85   36.70
   0  -7   1  470.55   35.20
  -1   7  -1  103.29   10.80
  -1   7  -1   87.49   10.40
  -1   7  -1   81.49   10.00
  -1   7  -1   95.79   12.50
  -1   7  -1  105.79   12.60
  -1   7  -1  102.69   15.30
  -1   7  -1   64.29   11.30
  -1   7  -1   88.39   12.40
  -1   7  -1   71.49    9.10
   1  -7   1  101.19    9.10
   1  -7   1   92.09   12.50
   1  -7   1   90.39    9.90
   1  -7   1   94.99   11.30
   1  -7   1   99.59    8.40
   1  -7   1   95.69   13.60
   1  -7   1  106.99   13.30
   1  -7   1   94.59   11.10
   1  -7   1   69.29   10.00
   1  -7   1   83.39   11.90
   1  -7   1   91.39   11.40
   1  -7   1   96.19   12.00
  -2   7  -1  973.60   64.39
  -2   7  -1  980.00   65.49
  -2   7  -1  940.41   67.99
  -2   7  -1 1029.50   68.59
  -2   7  -1  936.91   64.69
  -2   7  -1  917.01   67.59
  -2   7  -1  996.50   67.59
  -2   7  -1  935.21   64.89
  -2   7  -1  960.40   70.29
   2  -7   1  914.51   63.29
   2  -7   1  824.82   66.69
   2  -7   1  888.61   65.79
   2  -7   1  977.00   65.69
   2  -7   1  941.31   67.09
   2  -7   1  942.61   64.19
   2  -7   1  898.81   65.19
   2  -7   1  932.31   65.69
   2  -7   1  731.33   69.39
   2  -7   1  963.60   65.79
   2  -7   1 1035.30   67.69
   2  -7   1  955.20   64.59
  -3   7  -1   86.29   14.90
  -3   7  -1   75.49   10.80
  -3   7  -1   73.19   12.80
  -3   7  -1   75.59   10.40
  -3   7  -1   82.69   14.00
  -3   7  -1   75.29    9.50
  -3   7  -1   77.79   13.00
  -3   7  -1   90.99    9.80
  -3   7  -1   56.69   11.20
   3  -7   1   62.59   11.70
   3  -7   1   89.79   12.10
   3  -7   1   72.29   10.00
   3  -7   1   89.69   10.40
   3  -7   1   82.29   10.70
   3  -7   1   72.09    8.10
   3  -7   1   74.79   11.30
   3  -7   1   81.39    8.90
   3  -7   1   57.19   12.80
   3  -7   1   79.59   11.70
   3  -7   1   95.89   12.30
   3  -7   1   72.29    9.40
   3  -7   1   87.99   10.60
  -4   7  -1  216.28   26.20
  -4   7  -1  300.07   28.00
  -4   7  -1  259.57   26.90
  -4   7  -1  264.67   23.10
  -4   7  -1  247.48   23.30
  -4   7  -1  280.57   26.70
  -4   7  -1  276.67   22.10
  -4   7  -1  260.27   28.40
  -4   7  -1  273.97   21.60
   4  -7   1  255.57   22.00
   4  -7   1  283.07   21.30
   4  -7   1  311.67   22.20
   4  -7   1  285.87   22.20
   4  -7   1  274.37   22.80
   4  -7   1  269.47   20.50
   4  -7   1  232.78   28.50
   4  -7   1  255.87   23.60
   4  -7   1  270.27   23.70
   4  -7   1  263.07   23.70
   4  -7   1  251.27   20.30
   4  -7   1  298.57   24.40
  -5   7  -1  180.78   24.20
  -5   7  -1  146.89   17.60
  -5   7  -1  158.68   21.90
  -5   7  -1  123.49   14.60
  -5   7  -1  140.79   20.40
  -5   7  -1  148.89   15.90
  -5   7  -1  213.28   23.00
  -5   7  -1  170.58   23.80
  -5   7  -1  138.19   18.00
   5  -7   1  167.28   14.20
   5  -7   1  170.68   11.80
   5  -7   1  159.08   21.70
   5  -7   1  134.19   15.50
   5  -7   1  161.58   12.90
   5  -7   1  139.39   17.70
   5  -7   1  137.29   12.30
   5  -7   1  155.68   15.30
   5  -7   1  153.58   15.10
   5  -7   1  132.89   12.90
  -6   7  -1   13.20    6.40
  -6   7  -1   12.00    4.60
  -6   7  -1   32.60    9.30
  -6   7  -1   20.00   10.60
  -6   7  -1   19.60    7.30
  -6   7  -1   41.20   11.90
  -6   7  -1   18.90    5.60
  -6   7  -1   27.60    9.90
  -6   7  -1   26.10   10.40
   6  -7   1   26.50    4.40
   6  -7   1   20.90    4.40
   6  -7   1   37.10    7.40
   6  -7   1   20.30    2.10
   6  -7   1   32.50    6.90
   6  -7   1   17.50    2.10
   6  -7   1   23.50    7.50
   6  -7   1   28.70    9.80
  -7   7  -1  663.33   55.29
  -7   7  -1  717.73   50.89
  -7   7  -1  657.03   59.79
  -7   7  -1  677.93   51.09
  -7   7  -1  802.42   60.69
  -7   7  -1  594.04   57.19
  -7   7  -1  762.02   54.29
  -7   7  -1  697.03   58.09
  -7   7  -1  674.83   55.49
   7  -7   1  684.23   51.39
   7  -7   1  692.33   57.99
   7  -7   1  757.92   52.89
  -8   7  -1  136.49   23.40
  -8   7  -1   88.19   21.90
  -8   7  -1  147.89   24.70
  -8   7  -1  140.09   18.90
  -8   7  -1  126.59   15.70
  -8   7  -1  109.89   18.60
   8  -7   1  132.29   16.00
   8  -7   1  107.99   20.50
   8  -7   1  118.09   15.40
  -9   7  -1  106.19   23.60
  -9   7  -1  147.09   22.60
  -9   7  -1  139.39   20.20
  -9   7  -1  147.99   28.20
   9  -7   1  140.19   17.70
   9  -7   1  171.98   15.20
   9  -7   1  174.58   26.80
 -10   7  -1  234.58   27.50
 -10   7  -1  195.18   32.50
 -10   7  -1  207.88   35.80
 -11   7  -1    1.00   11.40
 -11   7  -1    6.00   13.20
 -12   7  -1   74.29   23.90
 -12   7  -1   79.49   23.60
 -15  -6   1   -7.00   10.20
 -15  -6   1   -2.80   11.30
  14   6  -1  115.89   15.80
 -14  -6   1   95.39   25.20
 -14  -6   1  137.09   30.20
  13   6  -1   36.80    9.90
 -13  -6   1   35.40   16.60
 -13  -6   1   31.20   15.20
  12   6  -1  154.88   20.60
 -12  -6   1  128.59   26.20
 -12  -6   1  137.09   27.10
  11   6  -1  221.68   19.50
  11   6  -1  226.08   23.00
  11   6  -1  234.78   18.40
 -11  -6   1  189.98   26.20
 -11  -6   1  199.98   30.50
 -11  -6   1  195.58   24.60
 -11  -6   1  152.88   28.90
  10   6  -1   12.50    5.40
  10   6  -1    7.90    5.60
  10   6  -1   11.90    6.90
 -10  -6   1   17.40    5.10
 -10  -6   1   18.60   10.10
 -10  -6   1   19.20    7.00
 -10  -6   1    9.00   10.50
 -10  -6   1   20.30    7.90
 -10  -6   1    4.70    8.30
   9   6  -1  175.58   18.70
   9   6  -1  203.58   17.30
   9   6  -1  226.28   18.90
   9   6  -1  193.08   23.40
  -9  -6   1  187.68   19.30
  -9  -6   1  202.68   22.10
  -9  -6   1  195.48   26.20
  -9  -6   1  209.18   28.20
  -9  -6   1  169.08   27.10
  -9  -6   1  193.08   23.30
   8   6  -1    3.50    3.70
   8   6  -1   -2.70    3.20
   8   6  -1    2.90    5.40
   8   6  -1    3.20    3.20
   8   6  -1    0.90    3.70
   8   6  -1    1.10    3.30
  -8  -6   1   -7.30    4.00
  -8  -6   1   -1.80    2.90
  -8  -6   1    2.80    3.00
  -8  -6   1    7.30    6.20
  -8  -6   1    5.50    4.30
  -8  -6   1    5.90    7.40
   7   6  -1  749.82   58.99
   7   6  -1  733.53   55.09
   7   6  -1  818.52   56.79
   7   6  -1  781.92   51.39
   7   6  -1  819.52   56.79
   7   6  -1  841.32   54.69
   7   6  -1  803.52   54.59
  -7  -6   1  719.33   56.59
  -7  -6   1  747.43   59.49
  -7  -6   1  657.33   60.99
  -7  -6   1  714.23   58.09
  -7  -6   1  732.93   55.29
   6   6  -1  759.42   58.99
   6   6  -1  744.93   54.59
   6   6  -1  727.03   53.89
   6   6  -1  804.92   56.09
   6   6  -1  821.02   54.29
   6   6  -1  803.12   56.89
   6   6  -1  754.42   50.89
  -6  -6   1  769.62   51.29
  -6  -6   1  752.12   54.79
  -6  -6   1  813.22   58.99
  -6  -6   1  761.72   57.59
  -6  -6   1  680.73   60.19
  -6  -6   1  779.02   56.39
   5   6  -1   16.80    4.50
   5   6  -1   19.60    4.70
   5   6  -1   17.20    5.00
   5   6  -1   16.60    6.40
   5   6  -1   18.30    4.30
   5   6  -1   23.40    6.10
   5   6  -1   13.70    3.20
   5   6  -1   16.00    2.30
  -5  -6   1   18.50    7.70
  -5  -6   1   15.30    4.70
  -5  -6   1   22.50    6.70
  -5  -6   1   17.20    4.50
  -5  -6   1   10.60    3.80
  -5  -6   1    3.20    2.10
  -5  -6   1   16.40    2.00
  -5  -6   1   13.90    5.80
   4   6  -1  148.89   13.10
   4   6  -1  132.59   12.00
   4   6  -1  139.19   11.10
   4   6  -1   73.99   11.20
   4   6  -1  129.89   11.90
   4   6  -1  119.79   13.90
   4   6  -1  122.49   14.20
   4   6  -1  110.59   16.50
   4   6  -1  127.59   11.60
  -4  -6   1  116.99   12.90
  -4  -6   1  136.99   13.80
  -4  -6   1  102.99   16.40
  -4  -6   1  131.59   11.40
  -4  -6   1  140.99   12.20
  -4  -6   1  143.79   16.90
   3   6  -1 1461.15   94.49
   3   6  -1 1406.06   92.79
   3   6  -1 1330.17   94.09
   3   6  -1 1114.59   96.49
   3   6  -1 1350.86   92.99
   3   6  -1 1456.25   93.19
   3   6  -1 1350.16   92.89
   3   6  -1 1419.86   94.19
   3   6  -1 1444.76   92.59
  -3  -6   1 1456.45   94.99
  -3  -6   1 1455.05   93.49
  -3  -6   1 1259.67   97.29
  -3  -6   1 1367.66   94.09
  -3  -6   1 1377.46   95.49
  -3  -6   1 1328.97   91.79
  -3  -6   1 1428.66   93.19
  -3  -6   1 1351.46   92.39
   2   6  -1  858.01   59.79
   2   6  -1  838.72   58.89
   2   6  -1  861.91   59.09
   2   6  -1  913.21   58.89
   2   6  -1  848.12   60.09
   2   6  -1  865.61   58.79
   2   6  -1  875.01   59.89
   2   6  -1  803.42   62.99
  -2  -6   1  822.62   60.79
  -2  -6   1  892.71   58.89
  -2  -6   1  812.22   59.89
  -2  -6   1  811.52   59.59
  -2  -6   1  879.11   59.59
  -2  -6   1  865.31   60.49
  -2  -6   1  899.81   63.29
  -2  -6   1  840.12   58.39
  -2  -6   1  850.01   58.59
  -2  -6   1  852.01   57.89
  -2  -6   1  855.61   60.29
   1   6  -1  997.40   69.09
   1   6  -1  984.30   69.59
   1   6  -1  917.51   71.99
   1   6  -1 1005.40   68.89
   1   6  -1 1008.00   68.69
   1   6  -1 1033.30   68.89
   1   6  -1  983.80   67.99
   1   6  -1  999.10   68.19
  -1  -6   1  967.60   68.49
  -1  -6   1 1007.80   67.89
  -1  -6   1 1068.99   67.39
  -1  -6   1 1005.30   67.79
  -1  -6   1  993.90   70.19
  -1  -6   1 1007.00   69.39
  -1  -6   1  969.00   68.99
  -1  -6   1  991.30   68.99
  -1  -6   1 1064.39   71.89
  -1  -6   1  991.30   67.99
   0   6  -1  386.76   33.00
   0   6  -1  479.15   34.40
   0   6  -1  487.25   35.00
   0   6  -1  460.95   34.90
   0   6  -1  515.15   34.80
   0   6  -1  494.65   36.00
   0   6  -1  533.95   34.40
   0   6  -1  466.25   38.00
   0   6  -1  497.15   35.60
   0  -6   1  518.05   35.20
   0  -6   1  472.75   34.70
   0  -6   1  450.95   35.20
   0  -6   1  498.45   33.20
   0  -6   1  501.05   35.40
   0  -6   1  450.35   33.70
   0  -6   1  568.04   37.30
   0  -6   1  450.65   35.70
   0  -6   1  409.06   33.40
   0  -6   1  463.65   36.60
   0  -6   1  472.45   35.30
   0  -6   1  482.45   35.40
   0  -6   1  460.35   33.90
  -1   6  -1  597.24   41.00
  -1   6  -1  634.34   41.70
  -1   6  -1  573.94   43.50
  -1   6  -1  606.64   42.90
  -1   6  -1  639.54   43.70
  -1   6  -1  583.94   41.70
  -1   6  -1  575.14   41.50
  -1   6  -1  518.25   44.80
  -1   6  -1  610.34   43.70
   1  -6   1  580.84   41.90
   1  -6   1  559.14   44.10
   1  -6   1  569.94   41.20
   1  -6   1  592.54   43.50
   1  -6   1  548.55   41.70
   1  -6   1  570.04   42.20
   1  -6   1  614.84   44.00
   1  -6   1  550.54   42.50
   1  -6   1  613.94   46.40
   1  -6   1  618.74   42.70
   1  -6   1  609.04   40.50
   1  -6   1  592.24   41.20
  -2   6  -1  113.59   12.10
  -2   6  -1  135.39   16.20
  -2   6  -1  112.19   15.10
  -2   6  -1  128.19   16.80
  -2   6  -1  131.99   15.30
  -2   6  -1  140.09   14.00
  -2   6  -1  120.19   10.80
  -2   6  -1  150.08   12.30
  -2   6  -1  129.39   11.30
  -2   6  -1   75.29   11.70
   2  -6   1  130.89   11.10
   2  -6   1  131.19   11.90
   2  -6   1  137.99   12.50
   2  -6   1  134.89   13.30
   2  -6   1  116.29   15.20
   2  -6   1  129.49   10.30
   2  -6   1  124.59   13.60
   2  -6   1  127.79   12.10
   2  -6   1   86.09   14.70
   2  -6   1  129.29   11.30
   2  -6   1   93.99   14.20
   2  -6   1  144.09   12.70
   2  -6   1  153.38   13.90
  -3   6  -1  205.38   16.60
  -3   6  -1  199.18   16.00
  -3   6  -1  198.88   19.00
  -3   6  -1  193.58   20.30
  -3   6  -1  195.78   17.60
  -3   6  -1  188.58   21.40
  -3   6  -1  195.98   20.30
  -3   6  -1  180.38   19.20
  -3   6  -1  226.08   17.80
   3  -6   1  204.88   16.80
   3  -6   1  162.68   22.10
   3  -6   1  186.88   18.00
   3  -6   1  207.28   17.30
   3  -6   1  184.78   16.80
   3  -6   1  193.48   15.20
   3  -6   1  200.18   16.70
   3  -6   1  217.48   18.00
   3  -6   1  206.28   18.40
   3  -6   1  142.79   19.30
   3  -6   1  216.08   18.60
   3  -6   1  213.28   16.40
   3  -6   1  204.38   15.80
  -4   6  -1  591.84   48.50
  -4   6  -1  583.04   45.90
  -4   6  -1  599.44   42.80
  -4   6  -1  577.54   44.50
  -4   6  -1  598.04   42.30
  -4   6  -1  607.94   48.00
  -4   6  -1  523.75   46.50
  -4   6  -1  588.14   46.60
  -4   6  -1  681.83   44.80
   4  -6   1  631.04   43.40
   4  -6   1  603.44   42.60
   4  -6   1  573.54   41.60
   4  -6   1  577.44   42.80
   4  -6   1  598.24   41.50
   4  -6   1  601.34   43.60
   4  -6   1  572.24   44.70
   4  -6   1  515.35   44.30
   4  -6   1  615.24   44.80
   4  -6   1  637.14   42.60
   4  -6   1  637.74   43.60
   4  -6   1  527.85   46.90
   4  -6   1  670.53   45.50
  -5   6  -1   34.30    8.10
  -5   6  -1   31.20   10.00
  -5   6  -1   29.60    5.90
  -5   6  -1   39.80    6.80
  -5   6  -1   33.50   11.00
  -5   6  -1   40.90   10.40
  -5   6  -1   25.70    7.10
  -5   6  -1   49.70   11.30
  -5   6  -1   37.70    8.60
   5  -6   1   40.00    5.90
   5  -6   1   40.80    7.00
   5  -6   1   40.40    7.00
   5  -6   1   28.70    4.90
   5  -6   1   39.20    8.30
   5  -6   1   47.50   11.50
   5  -6   1   42.40    7.50
   5  -6   1   38.90    6.10
   5  -6   1   33.40    7.70
   5  -6   1   36.50    8.00
   5  -6   1   35.10    5.50
  -6   6  -1  152.58   18.30
  -6   6  -1  167.88   22.10
  -6   6  -1  135.19   14.80
  -6   6  -1  159.08   20.10
  -6   6  -1  166.88   22.90
  -6   6  -1  149.59   19.00
  -6   6  -1  157.68   24.50
  -6   6  -1  134.09   15.10
  -6   6  -1  130.19   21.60
   6  -6   1  149.49   15.10
   6  -6   1  153.08   12.00
   6  -6   1  152.68   20.80
   6  -6   1  161.58   13.60
   6  -6   1  166.18   14.60
   6  -6   1  120.59   15.00
   6  -6   1  163.28   12.40
   6  -6   1  126.19   14.20
   6  -6   1  144.09   17.90
  -7   6  -1  104.39   18.20
  -7   6  -1   94.19   14.00
  -7   6  -1   76.79   15.60
  -7   6  -1   87.59   10.90
  -7   6  -1   84.99   19.40
  -7   6  -1   88.89   11.60
  -7   6  -1   80.29   14.30
  -7   6  -1   83.29   14.60
  -7   6  -1   48.60   14.00
   7  -6   1   69.69   12.10
   7  -6   1   97.49   11.90
   7  -6   1   78.89    6.00
  -8   6  -1   63.99   18.10
  -8   6  -1  100.99   16.50
  -8   6  -1  128.19   22.10
  -8   6  -1   99.19   15.10
  -8   6  -1   85.79   18.10
  -8   6  -1   95.19   12.00
  -8   6  -1   60.19   16.90
   8  -6   1   90.59   13.30
   8  -6   1  104.89   13.50
  -9   6  -1  288.47   29.20
  -9   6  -1  210.78   33.10
  -9   6  -1  224.28   29.10
  -9   6  -1  196.98   33.30
  -9   6  -1  279.47   35.10
   9  -6   1  266.77   22.60
   9  -6   1  236.28   22.40
   9  -6   1  254.97   33.20
 -10   6  -1    6.20   10.00
 -10   6  -1    3.10    6.50
 -10   6  -1   -9.70    9.40
  10  -6   1    6.80    5.10
  10  -6   1   10.60    9.30
  10  -6   1    0.20    3.10
 -11   6  -1  203.78   34.80
 -11   6  -1  301.47   43.80
 -11   6  -1  280.27   31.00
 -12   6  -1   84.19   25.60
 -12   6  -1   62.19   20.50
 -15  -5   1  102.79   27.70
 -15  -5   1  101.39   28.00
  14   5  -1   89.19   12.10
 -14  -5   1   96.89   25.20
 -14  -5   1  101.19   27.70
  13   5  -1   61.99   11.70
 -13  -5   1   43.20   19.20
 -13  -5   1   56.09   18.20
  12   5  -1  240.18   22.40
 -12  -5   1  120.59   26.70
 -12  -5   1  254.47   36.50
  11   5  -1   -0.10    4.50
  11   5  -1    5.10    3.60
  11   5  -1   -1.20    2.50
 -11  -5   1   -4.50    7.10
 -11  -5   1    0.70    4.90
 -11  -5   1    4.20    5.20
 -11  -5   1    3.30    8.40
  10   5  -1  590.34   45.70
  10   5  -1  595.44   42.80
 -10  -5   1  578.94   47.30
 -10  -5   1  514.65   50.69
 -10  -5   1  554.14   42.10
 -10  -5   1  504.75   49.20
 -10  -5   1  620.24   46.20
   9   5  -1  368.66   27.40
   9   5  -1  353.76   29.70
   9   5  -1  371.36   30.40
   9   5  -1  320.97   25.60
   9   5  -1  329.67   27.60
  -9  -5   1  246.78   33.50
  -9  -5   1  347.97   26.80
  -9  -5   1  314.37   29.90
  -9  -5   1  310.97   28.50
  -9  -5   1  384.36   35.60
   8   5  -1  170.98   18.70
   8   5  -1  153.48   13.60
   8   5  -1  146.49   18.80
   8   5  -1  130.19   14.70
   8   5  -1  152.48   15.70
  -8  -5   1  149.79   18.80
  -8  -5   1  124.29   19.70
  -8  -5   1  159.38   17.70
  -8  -5   1  120.29   20.40
  -8  -5   1  158.58   14.10
   7   5  -1  440.46   35.50
   7   5  -1  461.35   33.80
   7   5  -1  427.46   31.20
   7   5  -1  453.75   31.80
   7   5  -1  366.76   31.80
   7   5  -1  442.96   33.30
  -7  -5   1  404.76   35.40
  -7  -5   1  417.16   32.70
  -7  -5   1  421.66   34.10
  -7  -5   1  393.36   36.30
  -7  -5   1  381.96   30.80
   6   5  -1   60.59    9.00
   6   5  -1   70.19   11.60
   6   5  -1   67.29    9.90
   6   5  -1   50.69    8.90
   6   5  -1   69.89    8.60
   6   5  -1   48.00    7.50
  -6  -5   1   62.49   11.90
  -6  -5   1   49.99    7.50
  -6  -5   1   57.49    9.50
  -6  -5   1   77.49    9.90
  -6  -5   1   67.69   11.80
   5   5  -1  283.77   23.70
   5   5  -1  320.67   23.40
   5   5  -1  288.87   20.10
   5   5  -1  335.77   23.00
   5   5  -1  311.17   22.70
   5   5  -1  249.48   25.60
  -5  -5   1  295.47   22.90
  -5  -5   1  293.87   20.40
  -5  -5   1  275.57   24.70
  -5  -5   1  289.57   24.10
  -5  -5   1  298.57   23.20
  -5  -5   1  310.37   22.50
  -5  -5   1  282.07   25.60
  -5  -5   1  250.87   27.00
   4   5  -1  669.13   44.00
   4   5  -1  662.83   50.59
   4   5  -1  685.93   47.60
   4   5  -1  666.33   45.30
   4   5  -1  655.83   46.10
   4   5  -1  708.33   46.70
   4   5  -1  555.24   45.80
   4   5  -1  680.03   48.10
  -4  -5   1  647.84   49.00
  -4  -5   1  591.24   50.59
  -4  -5   1  696.93   46.30
  -4  -5   1  664.13   48.40
  -4  -5   1  693.83   43.70
  -4  -5   1  644.64   46.50
   3   5  -1    7.40    2.80
   3   5  -1    7.70    3.20
   3   5  -1    2.70    2.10
   3   5  -1    4.00    2.50
   3   5  -1    4.90    2.10
   3   5  -1    2.60    2.00
   3   5  -1   10.10    3.20
   3   5  -1    7.30    3.30
   3   5  -1    8.20    4.50
   3   5  -1    3.00    2.20
  -3  -5   1    6.30    2.20
  -3  -5   1   11.00    4.00
  -3  -5   1    7.20    2.30
  -3  -5   1    6.40    2.80
  -3  -5   1    6.00    1.80
  -3  -5   1    8.00    4.50
  -3  -5   1    3.70    2.90
  -3  -5   1    3.80    2.30
   2   5  -1  221.38   16.50
   2   5  -1  178.98   14.90
   2   5  -1  178.68   15.60
   2   5  -1  179.58   14.60
   2   5  -1  188.08   14.80
   2   5  -1  199.38   15.70
   2   5  -1  175.78   14.60
   2   5  -1  190.98   15.60
   2   5  -1  166.78   17.70
  -2  -5   1  181.58   14.50
  -2  -5   1  199.08   15.70
  -2  -5   1  189.68   15.90
  -2  -5   1  166.78   13.90
  -2  -5   1  200.28   15.00
  -2  -5   1  198.48   16.80
  -2  -5   1  156.88   17.40
  -2  -5   1  192.08   16.10
  -2  -5   1  187.98   15.30
  -2  -5   1  201.08   14.90
  -2  -5   1  169.48   14.10
   1   5  -1   57.69    8.00
   1   5  -1   54.49    6.90
   1   5  -1   35.10    5.10
   1   5  -1   56.19    6.50
   1   5  -1   49.40    7.20
   1   5  -1   61.79    9.90
   1   5  -1   52.59    6.90
   1   5  -1   56.49    7.10
   1   5  -1   57.39    7.10
   1   5  -1   58.99    6.00
  -1  -5   1   52.09    8.90
  -1  -5   1   63.79    6.20
  -1  -5   1   45.00    5.80
  -1  -5   1   59.29    7.90
  -1  -5   1   41.90    5.70
  -1  -5   1   51.69    7.00
  -1  -5   1   42.50    6.50
  -1  -5   1   51.19    7.60
  -1  -5   1   55.99    7.50
  -1  -5   1   43.60    6.10
  -1  -5   1   51.29    5.70
  -1  -5   1   45.20    6.10
  -1  -5   1   52.39    8.10
   0   5  -1 1103.69   74.69
   0   5  -1 1086.89   74.29
   0   5  -1 1104.19   73.49
   0   5  -1 1051.69   72.99
   0   5  -1 1117.79   73.59
   0   5  -1 1043.10   76.49
   0   5  -1 1095.09   74.69
   0   5  -1 1069.19   73.89
   0   5  -1 1115.69   73.99
   0  -5   1 1099.39   74.89
   0  -5   1 1154.08   74.69
   0  -5   1 1093.99   74.79
   0  -5   1 1063.39   72.29
   0  -5   1 1040.50   73.59
   0  -5   1 1091.29   72.89
   0  -5   1 1082.49   74.19
   0  -5   1 1063.59   73.79
   0  -5   1 1105.99   75.69
   0  -5   1  986.40   72.79
   0  -5   1 1140.29   74.19
   0  -5   1 1082.19   73.09
  -1   5  -1  532.35   41.30
  -1   5  -1  554.04   37.60
  -1   5  -1  548.95   39.80
  -1   5  -1  530.35   39.80
  -1   5  -1  536.25   38.00
  -1   5  -1  588.74   38.40
  -1   5  -1  582.54   39.60
  -1   5  -1  576.94   38.40
  -1   5  -1  542.85   39.90
   1  -5   1  569.44   38.90
   1  -5   1  490.65   40.20
   1  -5   1  529.85   39.70
   1  -5   1  540.15   39.40
   1  -5   1  525.75   38.40
   1  -5   1  563.04   38.60
   1  -5   1  605.74   40.70
   1  -5   1  529.75   40.60
   1  -5   1  524.75   39.00
   1  -5   1  441.56   39.30
   1  -5   1  546.25   37.20
   1  -5   1  556.44   38.00
   1  -5   1  563.34   38.00
  -2   5  -1   85.19   11.30
  -2   5  -1   55.49    7.00
  -2   5  -1   64.49    7.30
  -2   5  -1   68.69   10.70
  -2   5  -1   51.69    9.20
  -2   5  -1   51.79    6.40
  -2   5  -1   59.49    7.80
  -2   5  -1   64.79    9.90
  -2   5  -1   62.59    9.20
   2  -5   1   44.50    9.00
   2  -5   1   57.19    9.70
   2  -5   1   54.89    8.50
   2  -5   1   54.79    7.20
   2  -5   1   60.19    7.20
   2  -5   1   58.99    7.70
   2  -5   1   56.09    6.10
   2  -5   1   61.29    8.30
   2  -5   1   63.99   11.00
   2  -5   1   74.79   10.00
   2  -5   1   51.79    7.80
   2  -5   1   70.69    8.70
  -3   5  -1 1230.68   86.39
  -3   5  -1 1266.37   89.59
  -3   5  -1 1198.48   87.89
  -3   5  -1 1227.58   88.39
  -3   5  -1 1229.28   89.79
  -3   5  -1 1145.59   88.59
  -3   5  -1 1302.67   85.59
  -3   5  -1 1271.87   86.89
  -3   5  -1 1253.67   84.99
   3  -5   1 1319.57   84.49
   3  -5   1 1384.56   86.79
   3  -5   1 1247.98   85.69
   3  -5   1 1238.58   86.29
   3  -5   1 1427.46   88.19
   3  -5   1 1273.17   87.79
   3  -5   1 1234.08   85.29
   3  -5   1 1352.36   86.29
   3  -5   1 1221.58   87.49
   3  -5   1 1208.18   86.69
  -4   5  -1    3.40    3.10
  -4   5  -1    7.30    4.00
  -4   5  -1   -1.00    3.00
  -4   5  -1    5.90    4.60
  -4   5  -1   -6.00    3.30
  -4   5  -1    3.20    3.30
  -4   5  -1   -2.70    4.50
  -4   5  -1    2.80    2.30
  -4   5  -1    2.00    2.20
   4  -5   1   -0.70    2.30
   4  -5   1   -2.30    1.70
   4  -5   1   -0.90    1.70
   4  -5   1    1.20    2.20
   4  -5   1    7.70    4.00
   4  -5   1    0.60    4.70
   4  -5   1    1.70    2.50
   4  -5   1    5.90    4.30
   4  -5   1   -0.20    2.50
   4  -5   1   -0.10    1.70
   4  -5   1   -2.30    1.50
   4  -5   1   -1.40    1.60
  -5   5  -1  490.05   40.40
  -5   5  -1  470.65   37.20
  -5   5  -1  487.75   38.10
  -5   5  -1  513.75   35.30
  -5   5  -1  491.15   39.70
  -5   5  -1  530.95   36.00
  -5   5  -1  429.86   41.50
  -5   5  -1  377.56   39.40
  -5   5  -1  456.15   38.40
   5  -5   1  459.65   36.20
   5  -5   1  527.75   35.30
   5  -5   1  560.84   38.60
   5  -5   1  471.75   35.60
   5  -5   1  462.95   37.60
   5  -5   1  499.35   36.10
   5  -5   1  521.95   41.00
   5  -5   1  509.25   35.60
   5  -5   1  494.85   37.70
   5  -5   1  446.26   34.40
   5  -5   1  494.75   37.60
   5  -5   1  514.05   35.70
  -6   5  -1  131.19   13.60
  -6   5  -1  123.29   21.30
  -6   5  -1  141.79   17.70
  -6   5  -1  133.59   14.20
  -6   5  -1  105.79   18.90
  -6   5  -1  156.48   21.00
  -6   5  -1  137.09   17.80
  -6   5  -1  118.19   18.00
  -6   5  -1  133.09   16.10
   6  -5   1  137.69   11.30
   6  -5   1  137.09   11.40
   6  -5   1  150.28   14.10
   6  -5   1  146.09   13.00
   6  -5   1  136.89   13.90
   6  -5   1  136.19   19.20
   6  -5   1  111.09   12.50
   6  -5   1  144.59   13.20
   6  -5   1  127.49   11.60
   6  -5   1  130.59   16.20
  -7   5  -1  446.06   36.60
  -7   5  -1  549.65   44.00
  -7   5  -1  448.46   45.20
  -7   5  -1  358.46   41.60
  -7   5  -1  522.85   41.60
  -7   5  -1  391.06   40.50
  -7   5  -1  482.65   36.40
  -7   5  -1  534.25   39.90
  -7   5  -1  446.66   39.90
   7  -5   1  603.14   42.80
   7  -5   1  547.55   36.10
   7  -5   1  472.25   36.90
   7  -5   1  509.25   33.90
   7  -5   1  531.35   38.20
   7  -5   1  474.45   33.70
   7  -5   1  528.25   35.50
   7  -5   1  473.55   38.90
  -8   5  -1  191.38   18.10
  -8   5  -1  139.79   25.70
  -8   5  -1  215.78   27.30
  -8   5  -1  212.58   26.60
  -8   5  -1  224.98   24.20
  -8   5  -1  205.58   31.90
  -8   5  -1  237.58   28.80
  -8   5  -1  201.18   24.80
   8  -5   1  222.18   20.70
   8  -5   1  232.28   19.50
  -9   5  -1  154.58   20.60
  -9   5  -1  182.88   26.20
  -9   5  -1  122.09   24.60
  -9   5  -1  117.39   25.80
   9  -5   1  191.28   19.40
   9  -5   1  159.28   19.00
 -10   5  -1   60.19   18.70
 -10   5  -1  113.09   17.40
 -10   5  -1   74.39   21.10
  10  -5   1   88.09   13.30
  10  -5   1  110.29   13.70
  10  -5   1  140.89   23.30
 -11   5  -1   70.19   21.50
 -11   5  -1   95.99   16.80
 -11   5  -1   50.99   18.10
  11  -5   1  112.39   21.90
 -12   5  -1   24.80   15.20
 -12   5  -1    7.20   13.20
 -13   5  -1   80.79   23.80
 -13   5  -1  128.49   30.70
 -15  -4   1   71.39   25.20
 -15  -4   1   41.90   19.40
 -14  -4   1  -14.10    9.60
 -14  -4   1   -9.60    8.00
  13   4  -1  320.57   25.70
 -13  -4   1  212.18   37.20
 -13  -4   1  276.47   42.60
  12   4  -1    9.40    5.50
 -12  -4   1   -8.90    7.00
 -12  -4   1   -0.30    8.80
  11   4  -1  271.07   23.00
  11   4  -1  262.27   24.20
 -11  -4   1  232.78   29.10
 -11  -4   1  186.08   30.50
 -11  -4   1  271.37   37.10
  10   4  -1  204.68   19.80
  10   4  -1  188.38   27.00
  10   4  -1  202.68   16.20
 -10  -4   1  162.88   27.50
 -10  -4   1  154.28   27.00
 -10  -4   1  191.78   22.50
 -10  -4   1  179.28   23.50
 -10  -4   1  158.48   17.60
 -10  -4   1  137.09   24.00
   9   4  -1    0.80    3.20
   9   4  -1    5.30    4.70
   9   4  -1    0.40    3.20
   9   4  -1   -1.80    4.30
   9   4  -1    2.40    4.10
   9   4  -1    0.10    3.60
  -9  -4   1    0.20    3.60
  -9  -4   1    3.40    6.70
  -9  -4   1    0.80    5.50
  -9  -4   1    2.60    3.50
  -9  -4   1    2.10    6.30
  -9  -4   1    2.10    4.20
   8   4  -1  544.85   41.70
   8   4  -1  613.74   41.60
   8   4  -1  547.85   37.20
   8   4  -1  521.15   38.00
   8   4  -1  491.35   40.00
   8   4  -1  560.74   41.30
   8   4  -1  483.05   38.40
  -8  -4   1  477.45   40.60
  -8  -4   1  500.25   37.50
  -8  -4   1  526.55   39.80
  -8  -4   1  501.75   44.20
  -8  -4   1  441.36   44.10
  -8  -4   1  458.05   42.50
   7   4  -1  313.27   23.60
   7   4  -1  311.67   25.30
   7   4  -1  288.07   25.40
   7   4  -1  333.37   27.70
   7   4  -1  332.47   24.30
   7   4  -1  316.57   27.00
  -7  -4   1  292.67   28.80
  -7  -4   1  290.17   23.60
  -7  -4   1  269.27   32.60
  -7  -4   1  322.07   25.50
  -7  -4   1  311.17   26.60
  -7  -4   1  300.77   28.20
   6   4  -1  155.18   17.70
   6   4  -1  166.98   14.30
   6   4  -1  152.28   17.70
   6   4  -1  130.09   12.90
   6   4  -1  119.39   13.00
   6   4  -1  160.68   12.80
   6   4  -1  136.59   16.50
   6   4  -1  143.19   12.20
  -6  -4   1  149.49   14.50
  -6  -4   1   73.69   15.60
  -6  -4   1  137.79   12.20
  -6  -4   1  150.28   18.70
  -6  -4   1  132.89   17.00
  -6  -4   1  120.49   14.20
   5   4  -1  893.51   67.29
   5   4  -1  934.81   65.49
   5   4  -1  968.70   64.19
   5   4  -1  964.60   64.09
   5   4  -1  983.00   65.79
   5   4  -1  997.90   65.79
   5   4  -1  857.11   64.49
   5   4  -1  919.51   66.69
  -5  -4   1  936.11   64.79
  -5  -4   1  945.81   66.89
  -5  -4   1  997.90   68.19
  -5  -4   1  920.21   63.89
  -5  -4   1  880.31   65.69
   4   4  -1    2.40    2.00
   4   4  -1    0.30    1.70
   4   4  -1    1.90    2.70
   4   4  -1    2.30    2.40
   4   4  -1   -0.30    0.70
   4   4  -1    3.20    3.30
   4   4  -1   -1.30    1.10
   4   4  -1   -0.90    1.60
  -4  -4   1    4.70    3.30
  -4  -4   1    1.60    1.80
  -4  -4   1   -1.40    1.30
  -4  -4   1    0.70    1.50
  -4  -4   1    0.00    1.60
  -4  -4   1   -0.10    1.50
  -4  -4   1    0.30    2.20
   3   4  -1 1125.29   78.09
   3   4  -1 1047.40   77.19
   3   4  -1 1159.98   77.39
   3   4  -1 1158.68   77.09
   3   4  -1 1127.69   75.49
   3   4  -1 1152.88   76.49
   3   4  -1 1251.57   79.59
   3   4  -1 1034.60   80.29
   3   4  -1 1283.07   78.79
   3   4  -1 1151.18   78.49
  -3  -4   1 1075.69   80.99
  -3  -4   1 1143.19   77.09
  -3  -4   1 1197.58   78.89
  -3  -4   1 1150.68   77.49
  -3  -4   1 1111.39   78.19
  -3  -4   1 1199.38   75.19
  -3  -4   1 1256.37   79.89
  -3  -4   1 1123.79   77.39
  -3  -4   1 1088.69   76.89
   2   4  -1  784.62   53.09
   2   4  -1  820.42   52.19
   2   4  -1  773.72   52.89
   2   4  -1  762.52   52.09
   2   4  -1  838.82   53.99
   2   4  -1  734.63   52.59
   2   4  -1  764.82   51.69
   2   4  -1  661.23   54.69
   2   4  -1  755.22   51.99
   2   4  -1  716.03   52.59
   2   4  -1  766.12   51.79
  -2  -4   1  802.62   52.09
  -2  -4   1  702.83   54.99
  -2  -4   1  745.23   52.89
  -2  -4   1  743.23   52.69
  -2  -4   1  795.92   53.89
  -2  -4   1  744.13   51.09
  -2  -4   1  806.02   52.29
  -2  -4   1  749.92   51.99
  -2  -4   1  794.02   53.29
   1   4  -1  762.82   55.59
   1   4  -1  830.62   53.79
   1   4  -1  790.92   52.79
   1   4  -1  774.92   52.49
   1   4  -1  786.42   52.39
   1   4  -1  776.42   53.09
   1   4  -1  795.32   53.49
   1   4  -1  798.72   51.99
   1   4  -1  799.02   53.19
   1   4  -1  785.72   54.09
   1   4  -1  799.32   52.79
  -1  -4   1  793.12   52.89
  -1  -4   1  782.52   53.09
  -1  -4   1  801.62   53.59
  -1  -4   1  758.62   53.39
  -1  -4   1  721.03   54.99
  -1  -4   1  735.13   52.39
  -1  -4   1  738.23   51.89
  -1  -4   1  733.43   53.79
  -1  -4   1  756.42   52.49
  -1  -4   1  770.92   53.19
  -1  -4   1  750.22   52.29
  -1  -4   1  744.53   53.09
  -1  -4   1  805.32   52.59
   0   4  -1   84.29    7.60
   0   4  -1   88.09    8.30
   0   4  -1   96.19    8.20
   0   4  -1   72.99    9.00
   0   4  -1   82.19    7.80
   0   4  -1   87.39    8.60
   0   4  -1  101.19    9.00
   0   4  -1   86.99    8.10
   0   4  -1   67.79   10.20
   0  -4   1   88.79    7.70
   0  -4   1   85.49    9.70
   0  -4   1   78.89    8.60
   0  -4   1   84.99    8.30
   0  -4   1   91.89    8.70
   0  -4   1   82.69    8.00
   0  -4   1   82.29    9.80
   0  -4   1   91.29    7.70
   0  -4   1   78.69    8.30
   0  -4   1   86.49    7.60
   0  -4   1   92.19    7.30
   0  -4   1   75.49    9.80
  -1   4  -1   42.00    4.70
  -1   4  -1   22.60    3.70
  -1   4  -1   16.50    4.30
  -1   4  -1   16.70    3.30
  -1   4  -1   20.00    5.00
  -1   4  -1   25.70    5.20
  -1   4  -1   22.50    4.80
  -1   4  -1   25.50    5.40
  -1   4  -1   18.10    3.10
  -1   4  -1   20.70    4.70
   1  -4   1   26.90    4.80
   1  -4   1   28.30    5.20
   1  -4   1   23.50    4.70
   1  -4   1   20.20    3.80
   1  -4   1   20.00    3.70
   1  -4   1   24.10    5.00
   1  -4   1   18.40    5.50
   1  -4   1   20.80    4.60
   1  -4   1   28.40    4.00
   1  -4   1   23.40    4.10
   1  -4   1   17.50    2.90
   1  -4   1   21.10    5.00
   1  -4   1   28.70    6.20
  -2   4  -1  754.92   50.59
  -2   4  -1  684.63   52.79
  -2   4  -1  768.22   52.89
  -2   4  -1  770.12   50.89
  -2   4  -1  722.93   53.19
  -2   4  -1  766.62   54.09
  -2   4  -1  765.02   51.49
  -2   4  -1  775.92   51.09
  -2   4  -1  734.23   53.89
   2  -4   1  697.03   50.79
   2  -4   1  777.22   50.29
   2  -4   1  780.22   53.19
   2  -4   1  741.83   51.99
   2  -4   1  761.02   51.69
   2  -4   1  740.63   51.99
   2  -4   1  753.42   51.79
   2  -4   1  683.83   53.29
   2  -4   1  746.23   51.09
   2  -4   1  706.43   52.59
   2  -4   1  796.82   53.09
  -3   4  -1 1055.19   90.09
  -3   4  -1 1112.59   89.59
  -3   4  -1 1156.58   89.09
  -3   4  -1 1319.67   87.99
  -3   4  -1 1340.87   86.49
  -3   4  -1 1357.76   88.39
  -3   4  -1 1386.96   90.69
  -3   4  -1 1351.96   89.49
  -3   4  -1 1362.56   87.09
   3  -4   1 1313.57   88.19
   3  -4   1 1431.46   89.39
   3  -4   1 1346.87   87.79
   3  -4   1 1038.00   88.69
   3  -4   1 1366.06   86.19
   3  -4   1 1308.87   88.99
   3  -4   1 1347.87   87.89
   3  -4   1 1265.77   89.19
   3  -4   1 1369.46   88.19
   3  -4   1 1304.27   86.89
   3  -4   1 1343.17   87.09
  -4   4  -1  913.31   65.09
  -4   4  -1  698.53   64.89
  -4   4  -1  930.01   61.59
  -4   4  -1  964.10   63.59
  -4   4  -1  814.22   66.89
  -4   4  -1  960.50   66.19
  -4   4  -1  928.41   63.89
  -4   4  -1  932.11   61.99
  -4   4  -1  857.01   64.29
   4  -4   1  795.62   65.79
   4  -4   1  918.21   61.99
   4  -4   1  883.01   61.09
   4  -4   1  944.41   62.19
   4  -4   1  983.70   63.19
   4  -4   1  964.00   62.49
   4  -4   1  815.22   64.19
   4  -4   1  935.41   63.59
   4  -4   1 1045.00   64.89
   4  -4   1  853.51   63.89
   4  -4   1  891.81   62.89
   4  -4   1  966.40   63.79
  -5   4  -1  788.72   53.59
  -5   4  -1  565.34   58.29
  -5   4  -1  807.02   55.99
  -5   4  -1  730.33   56.69
  -5   4  -1  725.23   56.09
  -5   4  -1  732.53   53.79
  -5   4  -1  862.01   59.09
  -5   4  -1  821.12   57.99
   5  -4   1  786.12   58.99
   5  -4   1  753.22   53.99
   5  -4   1  776.02   56.39
   5  -4   1  787.92   54.99
   5  -4   1  802.52   54.89
   5  -4   1  798.92   54.09
   5  -4   1  863.51   56.89
   5  -4   1  751.12   56.19
   5  -4   1  852.71   54.19
   5  -4   1  731.63   53.09
   5  -4   1  814.12   54.79
  -6   4  -1  122.79   21.30
  -6   4  -1  170.08   20.50
  -6   4  -1  173.58   15.90
  -6   4  -1  174.18   19.20
  -6   4  -1  187.68   15.60
  -6   4  -1  223.08   21.30
  -6   4  -1  165.48   20.10
  -6   4  -1  172.78   21.60
  -6   4  -1  137.49   23.40
   6  -4   1  202.88   15.70
   6  -4   1  200.28   18.40
   6  -4   1  181.98   16.00
   6  -4   1  208.68   17.40
   6  -4   1  188.18   17.70
   6  -4   1  204.68   15.70
   6  -4   1  206.18   21.00
   6  -4   1  193.78   18.40
   6  -4   1  189.48   16.40
   6  -4   1  180.08   15.40
  -7   4  -1 1492.95  105.39
  -7   4  -1 1541.75  110.89
  -7   4  -1 1486.75  108.19
  -7   4  -1 1476.35  109.19
  -7   4  -1 1574.94  110.69
  -7   4  -1 1600.14  112.19
   7  -4   1 1668.33  106.59
   7  -4   1 1655.33  111.39
   7  -4   1 1552.14  107.09
   7  -4   1 1515.25  105.99
   7  -4   1 1456.45  105.09
   7  -4   1 1493.55  108.29
   7  -4   1 1683.03  104.39
   7  -4   1 1620.44  105.59
  -8   4  -1    7.80    3.60
  -8   4  -1    1.70    6.70
  -8   4  -1    2.20    5.40
  -8   4  -1   -6.20    4.30
  -8   4  -1   -2.50    4.50
  -8   4  -1    3.50    8.00
  -8   4  -1    1.00    4.50
  -8   4  -1    2.80    4.90
   8  -4   1    4.70    4.60
   8  -4   1    2.20    1.30
   8  -4   1   -0.80    3.40
   8  -4   1    3.50    2.80
   8  -4   1    1.00    5.30
   8  -4   1    3.60    1.20
   8  -4   1    3.60    2.50
  -9   4  -1  237.28   19.70
  -9   4  -1  203.08   27.90
  -9   4  -1  164.88   28.10
  -9   4  -1  148.99   28.90
  -9   4  -1  258.47   26.10
  -9   4  -1  237.68   32.90
   9  -4   1  229.08   20.00
   9  -4   1  228.18   21.50
 -10   4  -1  319.47   38.60
 -10   4  -1  270.47   42.20
 -10   4  -1  386.36   32.60
 -10   4  -1  239.38   38.70
  10  -4   1  374.86   29.50
  10  -4   1  390.36   30.10
 -11   4  -1   -1.60    9.20
 -11   4  -1   -3.90    4.90
 -11   4  -1   -9.60    9.20
  11  -4   1   -4.70    3.60
  11  -4   1    5.80    4.60
  11  -4   1   -3.70    6.90
 -12   4  -1  201.58   25.70
 -12   4  -1  142.09   29.00
 -12   4  -1  158.48   32.20
  12  -4   1  227.38   32.10
 -13   4  -1   33.50   17.20
 -13   4  -1   59.09   20.90
 -15  -3   1  -11.70   11.90
 -15  -3   1   -4.20   13.20
 -14  -3   1  163.28   33.50
 -14  -3   1   81.09   23.50
  13   3  -1   32.20    6.00
 -13  -3   1   23.70   14.90
 -13  -3   1   20.40   13.90
  12   3  -1  131.19   16.00
  12   3  -1  158.18   20.00
 -12  -3   1  106.29   25.10
 -12  -3   1   90.79   21.60
  11   3  -1  119.59   15.80
  11   3  -1  139.89   17.20
 -11  -3   1   93.69   21.20
 -11  -3   1  113.69   18.90
 -11  -3   1  120.39   24.80
  10   3  -1    0.30    1.30
  10   3  -1    1.50    3.90
 -10  -3   1   -0.80    6.70
 -10  -3   1    3.30    4.70
 -10  -3   1   -5.00    6.40
 -10  -3   1    3.50    4.60
 -10  -3   1   -3.00    2.70
 -10  -3   1    0.50    7.10
   9   3  -1  429.26   30.20
   9   3  -1  451.45   34.70
   9   3  -1  357.56   32.40
   9   3  -1  466.25   33.20
   9   3  -1  429.46   30.20
  -9  -3   1  404.26   34.80
  -9  -3   1  352.76   37.80
  -9  -3   1  293.77   35.20
  -9  -3   1  377.66   30.40
  -9  -3   1  400.26   33.40
  -9  -3   1  399.56   38.80
   8   3  -1  161.48   14.90
   8   3  -1  174.88   13.70
   8   3  -1  161.38   14.90
   8   3  -1  179.88   18.00
   8   3  -1  180.98   15.50
   8   3  -1  167.88   16.80
   8   3  -1  195.48   17.20
  -8  -3   1  136.69   22.10
  -8  -3   1  169.28   18.90
  -8  -3   1  189.58   24.80
  -8  -3   1  133.79   21.10
  -8  -3   1  133.09   18.60
  -8  -3   1  129.69   14.90
   7   3  -1  192.88   19.30
   7   3  -1  200.08   16.20
   7   3  -1  194.18   18.70
   7   3  -1  211.88   17.90
   7   3  -1  208.98   18.90
   7   3  -1  197.78   17.50
   7   3  -1  226.78   18.90
   7   3  -1  215.68   17.20
  -7  -3   1  208.08   16.90
  -7  -3   1  194.08   24.80
  -7  -3   1  182.08   20.60
  -7  -3   1  174.68   18.70
  -7  -3   1  234.88   26.60
  -7  -3   1  214.18   18.50
   6   3  -1   19.70    5.90
   6   3  -1   18.80    4.80
   6   3  -1   11.50    4.30
   6   3  -1   16.80    4.20
   6   3  -1   24.60    6.00
   6   3  -1   23.00    5.40
   6   3  -1   20.00    3.90
  -6  -3   1   26.90    7.50
  -6  -3   1   12.60    3.70
  -6  -3   1   20.10    6.60
  -6  -3   1   22.00    7.50
  -6  -3   1   21.30    5.50
  -6  -3   1   24.50    5.40
   5   3  -1   46.00    8.10
   5   3  -1   48.00    6.20
   5   3  -1   56.89    7.90
   5   3  -1   68.09    8.70
   5   3  -1   54.19    7.80
   5   3  -1   43.80    6.90
   5   3  -1   57.79    9.10
   5   3  -1   42.80    6.10
  -5  -3   1   49.60    9.40
  -5  -3   1   57.69    7.60
  -5  -3   1   45.00    9.40
  -5  -3   1   52.29    8.00
  -5  -3   1   45.40    8.50
  -5  -3   1   44.30    6.10
   4   3  -1  803.22   54.39
   4   3  -1  798.52   54.49
   4   3  -1  767.62   55.89
   4   3  -1  786.82   53.19
   4   3  -1  796.82   54.39
   4   3  -1  802.92   53.19
   4   3  -1  822.22   55.49
   4   3  -1  731.03   53.59
  -4  -3   1  791.22   53.79
  -4  -3   1  746.23   52.99
  -4  -3   1  700.73   56.69
  -4  -3   1  805.42   52.79
  -4  -3   1  847.02   56.49
  -4  -3   1  748.53   54.59
  -4  -3   1  772.42   55.19
   3   3  -1  515.35   35.60
   3   3  -1  571.74   36.50
   3   3  -1  511.55   36.20
   3   3  -1  457.45   38.50
   3   3  -1  582.04   37.50
   3   3  -1  539.75   38.10
   3   3  -1  487.85   36.90
   3   3  -1  498.65   36.50
  -3  -3   1  533.85   36.00
  -3  -3   1  495.45   36.60
  -3  -3   1  543.45   38.50
  -3  -3   1  547.15   36.70
  -3  -3   1  545.95   37.90
  -3  -3   1  545.95   35.20
  -3  -3   1  519.45   36.20
   2   3  -1  344.87   24.80
   2   3  -1  373.76   24.10
   2   3  -1  344.47   24.10
   2   3  -1  362.56   25.50
   2   3  -1  339.17   24.80
   2   3  -1  280.67   26.00
   2   3  -1  321.37   23.50
   2   3  -1  331.67   24.10
   2   3  -1  350.06   24.70
  -2  -3   1  341.77   23.90
  -2  -3   1  367.46   22.60
  -2  -3   1  326.37   23.90
  -2  -3   1  319.47   24.80
  -2  -3   1  369.96   24.40
  -2  -3   1  334.27   22.90
  -2  -3   1  321.37   24.00
  -2  -3   1  350.16   25.50
  -2  -3   1  351.56   24.80
  -2  -3   1  329.67   24.10
   1   3  -1  112.99    9.20
   1   3  -1  110.19    9.70
   1   3  -1  106.59    8.70
   1   3  -1  108.89    9.40
   1   3  -1  110.49    8.70
   1   3  -1  108.99    9.10
   1   3  -1  106.69    8.60
   1   3  -1  100.29    9.00
   1   3  -1   84.79   11.20
   1   3  -1  108.99    8.80
  -1  -3   1  120.89    8.40
  -1  -3   1  113.79    8.80
  -1  -3   1   95.79    9.50
  -1  -3   1   91.19    8.90
  -1  -3   1  113.29    9.00
  -1  -3   1  116.39    9.40
  -1  -3   1  111.49    9.50
  -1  -3   1  102.89   10.70
  -1  -3   1  111.49    9.20
  -1  -3   1  111.59    9.00
  -1  -3   1  104.69    8.70
   0   3  -1   80.89    8.00
   0   3  -1   85.29    7.90
   0   3  -1  100.69    8.10
   0   3  -1   92.79    7.50
   0   3  -1   84.99    7.40
   0   3  -1   77.89    7.40
   0   3  -1   82.89    7.10
   0   3  -1   66.09    9.30
   0   3  -1   76.69    7.40
   0   3  -1   81.29    7.80
   0  -3   1   85.59    7.50
   0  -3   1   86.49    7.00
   0  -3   1   76.39    7.30
   0  -3   1   86.69    8.80
   0  -3   1   82.69    7.80
   0  -3   1   88.29    7.60
   0  -3   1   92.09    8.30
   0  -3   1   94.29    8.00
   0  -3   1   95.39    8.10
   0  -3   1   71.09    8.10
   0  -3   1   83.69    7.20
   0  -3   1   95.99    6.90
  -1   3  -1    5.40    1.70
  -1   3  -1    9.90    3.50
  -1   3  -1    9.10    3.40
  -1   3  -1   10.80    4.20
  -1   3  -1    6.20    2.60
  -1   3  -1    6.30    2.00
  -1   3  -1    2.90    1.80
  -1   3  -1    8.20    2.00
  -1   3  -1    7.60    3.10
  -1   3  -1    2.90    1.80
  -1   3  -1    5.10    2.80
  -1   3  -1    7.80    3.20
  -1   3  -1    3.90    2.10
   1  -3   1   10.50    2.40
   1  -3   1   16.70    4.70
   1  -3   1   10.00    2.70
   1  -3   1    6.20    2.10
   1  -3   1    3.30    2.20
   1  -3   1    5.50    2.00
   1  -3   1    7.20    3.20
   1  -3   1    7.20    2.60
   1  -3   1    7.40    3.70
   1  -3   1    0.40    1.10
   1  -3   1    6.80    1.70
   1  -3   1    7.20    2.10
   1  -3   1    3.20    2.10
  -2   3  -1  539.15   36.20
  -2   3  -1  537.35   38.20
  -2   3  -1  595.74   39.40
  -2   3  -1  479.05   39.00
  -2   3  -1  534.55   38.00
  -2   3  -1  567.34   36.60
  -2   3  -1  557.44   37.20
  -2   3  -1  447.06   38.30
  -2   3  -1  521.85   38.40
   2  -3   1  411.86   38.70
   2  -3   1  543.45   36.70
   2  -3   1  455.25   38.50
   2  -3   1  521.85   37.50
   2  -3   1  539.95   37.30
   2  -3   1  544.65   36.00
   2  -3   1  536.75   37.60
   2  -3   1  578.14   38.40
   2  -3   1  544.75   38.20
   2  -3   1  599.74   38.60
   2  -3   1  533.25   37.20
   2  -3   1  565.94   36.70
  -3   3  -1  143.79   15.10
  -3   3  -1  137.19   11.40
  -3   3  -1  126.89   16.40
  -3   3  -1  154.68   12.60
  -3   3  -1  103.69   14.90
  -3   3  -1  143.39   11.10
  -3   3  -1  142.09   13.10
  -3   3  -1  160.08   14.20
  -3   3  -1  109.69   11.90
   3  -3   1  138.39   11.40
   3  -3   1  157.98   14.00
   3  -3   1  137.19   11.40
   3  -3   1  140.49   10.90
   3  -3   1  153.88   13.30
   3  -3   1  167.28   12.90
   3  -3   1  167.48   13.80
   3  -3   1  137.39   12.40
   3  -3   1  134.79   12.90
   3  -3   1  121.99   16.10
   3  -3   1   98.39   14.10
   3  -3   1  164.38   12.60
   3  -3   1  165.78   12.50
  -4   3  -1 1075.99   77.89
  -4   3  -1 1095.79   77.39
  -4   3  -1 1049.49   76.99
  -4   3  -1 1141.99   76.79
  -4   3  -1 1162.48   76.39
  -4   3  -1 1173.48   74.99
  -4   3  -1 1107.99   74.39
   4  -3   1 1133.19   75.79
   4  -3   1 1120.49   74.89
   4  -3   1 1066.19   74.79
   4  -3   1 1054.29   76.89
   4  -3   1 1074.29   74.19
   4  -3   1 1037.00   77.39
   4  -3   1 1187.88   77.29
   4  -3   1 1162.68   76.89
   4  -3   1 1210.78   75.69
   4  -3   1 1100.69   75.99
   4  -3   1  989.60   78.69
   4  -3   1 1123.19   76.19
  -5   3  -1   21.50    4.50
  -5   3  -1   39.40    7.90
  -5   3  -1   32.00    7.00
  -5   3  -1   42.10    8.50
  -5   3  -1   29.40    4.80
  -5   3  -1   15.40    7.20
  -5   3  -1   33.60    6.70
  -5   3  -1   26.80    6.50
  -5   3  -1   29.30    9.30
   5  -3   1   34.90    5.60
   5  -3   1   33.70    6.40
   5  -3   1   32.90    6.00
   5  -3   1   27.70    5.10
   5  -3   1   45.10    7.90
   5  -3   1   15.20    5.20
   5  -3   1   41.00    8.10
   5  -3   1   33.50    6.20
   5  -3   1   32.10    4.90
   5  -3   1   36.90    9.00
  -6   3  -1   99.99   13.80
  -6   3  -1   86.89   13.10
  -6   3  -1   52.99   13.80
  -6   3  -1   87.79   11.80
  -6   3  -1  105.79   13.50
  -6   3  -1   76.39   15.00
  -6   3  -1   88.59    9.60
  -6   3  -1   72.09   12.50
   6  -3   1   78.99    9.50
   6  -3   1   91.99   11.00
   6  -3   1   86.99   10.00
   6  -3   1   98.39    9.70
   6  -3   1  106.49   15.90
   6  -3   1   77.19   10.50
   6  -3   1   88.59   12.40
   6  -3   1   81.49    9.40
   6  -3   1  100.99   12.80
   6  -3   1   92.19   12.60
  -7   3  -1   44.30   12.80
  -7   3  -1   74.79   13.20
  -7   3  -1   66.49   11.70
  -7   3  -1   63.39   11.00
  -7   3  -1   57.19   15.30
  -7   3  -1  100.19   15.10
  -7   3  -1   71.69   13.30
  -7   3  -1   81.29    9.50
   7  -3   1   75.39    8.10
   7  -3   1   73.89    9.40
   7  -3   1   65.59   11.60
   7  -3   1   95.39   12.00
   7  -3   1   83.89    9.20
   7  -3   1   94.49   15.00
   7  -3   1   69.29    9.70
   7  -3   1   83.69   10.90
  -8   3  -1  405.56   29.80
  -8   3  -1  416.36   33.00
  -8   3  -1  373.86   34.50
  -8   3  -1  366.66   34.90
  -8   3  -1  284.37   35.10
  -8   3  -1  415.46   36.00
  -8   3  -1  227.08   37.70
   8  -3   1  336.67   31.80
   8  -3   1  405.26   28.10
   8  -3   1  426.26   30.30
   8  -3   1  436.86   29.80
   8  -3   1  436.86   35.40
   8  -3   1  430.36   31.60
  -9   3  -1  349.96   48.60
  -9   3  -1  486.75   37.00
  -9   3  -1  501.75   43.30
  -9   3  -1  361.06   43.20
  -9   3  -1  506.05   44.30
  -9   3  -1  482.05   40.20
  -9   3  -1  506.95   44.00
   9  -3   1  565.24   34.20
   9  -3   1  516.85   40.20
 -10   3  -1   36.40   16.10
 -10   3  -1   38.90   14.50
 -10   3  -1   86.89   17.20
 -10   3  -1  100.49   15.20
  10  -3   1   58.49   11.20
 -11   3  -1   97.19   22.70
 -11   3  -1  157.88   21.10
 -11   3  -1   98.89   24.80
  11  -3   1  150.58   17.20
 -12   3  -1  175.38   23.50
 -12   3  -1   79.69   23.60
 -12   3  -1  151.38   31.90
  12  -3   1  167.58   14.90
  12  -3   1  183.88   27.70
 -13   3  -1   11.20   15.10
 -13   3  -1   15.80   13.20
 -14   3  -1  101.19   26.80
 -14   3  -1  149.09   33.70
 -15  -2   1   47.40   22.70
 -15  -2   1   59.09   22.80
 -14  -2   1  110.39   27.20
 -14  -2   1  115.19   29.70
 -13  -2   1   72.99   22.40
 -13  -2   1   56.09   19.60
 -13  -2   1   87.79   15.40
  12   2  -1  352.76   26.40
  12   2  -1  368.96   31.80
 -12  -2   1  215.88   37.60
 -12  -2   1  336.87   45.60
  11   2  -1   31.90    8.50
  11   2  -1   25.50    6.80
 -11  -2   1   -1.20    7.90
 -11  -2   1    4.40    8.50
 -11  -2   1   33.90    9.80
  10   2  -1   52.09    9.70
 -10  -2   1   57.29   15.70
 -10  -2   1   69.59   12.70
 -10  -2   1   32.20    7.30
 -10  -2   1   41.40   15.10
 -10  -2   1   42.00   13.60
 -10  -2   1   54.39   12.00
   9   2  -1   79.39    6.60
   9   2  -1   85.29   11.40
   9   2  -1   66.99   11.70
   9   2  -1   68.89    6.50
   9   2  -1   71.29   11.40
  -9  -2   1   59.79   11.40
  -9  -2   1   73.99   10.10
  -9  -2   1   77.99   16.60
  -9  -2   1   57.09   15.00
  -9  -2   1   80.49   13.80
  -9  -2   1   56.59   14.40
   8   2  -1  230.98   18.40
   8   2  -1  266.87   22.50
   8   2  -1  243.68   18.70
   8   2  -1  227.08   20.80
   8   2  -1  259.47   20.80
   8   2  -1  235.38   19.20
  -8  -2   1  205.88   27.00
  -8  -2   1  217.58   28.50
  -8  -2   1  233.18   22.40
  -8  -2   1  176.68   25.40
  -8  -2   1  227.68   21.10
  -8  -2   1  219.58   18.90
   7   2  -1 1610.34  105.09
   7   2  -1 1511.95  107.59
   7   2  -1 1503.35  105.69
   7   2  -1 1767.92  107.89
   7   2  -1 1608.44  104.49
   7   2  -1 1606.04  105.99
   7   2  -1 1685.83  109.09
   7   2  -1 1660.33  105.89
   7   2  -1 1683.23  107.79
  -7  -2   1 1528.95  108.79
  -7  -2   1 1447.26  111.49
  -7  -2   1 1408.86  110.99
  -7  -2   1 1429.16  110.19
  -7  -2   1 1549.24  107.49
  -7  -2   1 1509.65  105.39
   6   2  -1  496.35   34.00
   6   2  -1  469.95   35.00
   6   2  -1  503.45   36.10
   6   2  -1  434.46   33.50
   6   2  -1  472.35   32.60
   6   2  -1  459.45   33.20
   6   2  -1  472.85   34.90
   6   2  -1  457.15   34.60
   6   2  -1  518.85   34.80
  -6  -2   1  476.25   35.80
  -6  -2   1  415.36   32.80
  -6  -2   1  460.95   34.50
  -6  -2   1  411.56   37.30
  -6  -2   1  446.16   36.80
  -6  -2   1  451.45   37.80
   5   2  -1  105.59    8.70
   5   2  -1   96.89    9.50
   5   2  -1   92.49   10.10
   5   2  -1  115.19   10.80
   5   2  -1   98.09   12.20
   5   2  -1   92.09    8.90
   5   2  -1  114.89   10.40
   5   2  -1  105.49    9.80
  -5  -2   1  102.09   13.80
  -5  -2   1   88.89   12.50
  -5  -2   1   99.39   10.80
  -5  -2   1   90.89   11.20
  -5  -2   1   96.89   13.60
  -5  -2   1   92.39    8.90
   4   2  -1  549.45   36.60
   4   2  -1  448.56   35.00
   4   2  -1  515.95   36.20
   4   2  -1  474.75   34.00
   4   2  -1  530.15   34.40
   4   2  -1  546.55   35.40
   4   2  -1  445.86   34.80
  -4  -2   1  463.45   35.60
  -4  -2   1  523.05   37.40
  -4  -2   1  439.96   37.10
  -4  -2   1  498.95   34.30
  -4  -2   1  540.05   36.70
  -4  -2   1  475.25   34.80
   3   2  -1  895.51   61.19
   3   2  -1  921.61   61.19
   3   2  -1  942.11   60.39
   3   2  -1  933.11   62.39
   3   2  -1  851.21   60.19
   3   2  -1  963.60   61.19
   3   2  -1  902.31   61.89
   3   2  -1  856.01   60.69
  -3  -2   1  931.01   62.49
  -3  -2   1  939.91   61.49
  -3  -2   1  908.61   60.69
  -3  -2   1  894.31   59.99
  -3  -2   1  951.60   61.89
  -3  -2   1  870.01   60.29
  -3  -2   1  880.11   61.39
  -3  -2   1  795.72   62.69
   2   2  -1  299.47   25.10
   2   2  -1  360.16   24.30
   2   2  -1  332.77   23.80
   2   2  -1  321.97   24.00
   2   2  -1  360.76   23.70
   2   2  -1  361.96   23.60
   2   2  -1  329.47   24.40
   2   2  -1  348.57   24.70
  -2  -2   1  330.27   23.60
  -2  -2   1  274.27   25.20
  -2  -2   1  374.06   24.00
  -2  -2   1  329.97   23.70
  -2  -2   1  329.37   24.20
  -2  -2   1  360.96   23.40
  -2  -2   1  357.56   24.50
  -2  -2   1  317.77   23.70
  -2  -2   1  352.06   23.00
  -2  -2   1  390.66   25.30
   1   2  -1  968.60   62.79
   1   2  -1  952.90   62.39
   1   2  -1  978.10   63.49
   1   2  -1  997.90   63.19
   1   2  -1  790.72   63.99
   1   2  -1  946.91   62.69
   1   2  -1  944.61   62.59
   1   2  -1  967.00   62.99
   1   2  -1  953.60   63.19
   1   2  -1  907.61   62.89
  -1  -2   1  987.70   62.79
  -1  -2   1  927.01   63.19
  -1  -2   1  930.11   63.49
  -1  -2   1  975.00   62.79
  -1  -2   1  932.11   62.59
  -1  -2   1 1021.10   63.39
  -1  -2   1  951.70   62.59
  -1  -2   1  873.41   62.89
  -1  -2   1  938.81   62.69
  -1  -2   1  954.30   62.99
   0   2  -1 5721.83  366.46
   0   2  -1 5691.23  366.96
   0   2  -1 5580.24  366.56
   0   2  -1 5734.53  366.86
   0   2  -1 5632.64  366.76
   0   2  -1 5483.45  366.06
   0   2  -1 5828.72  367.06
   0   2  -1 5595.94  366.46
   0   2  -1 5382.46  367.66
   0  -2   1 5425.86  366.06
   0  -2   1 6220.88  366.66
   0  -2   1 5558.84  366.46
   0  -2   1 5314.47  366.46
   0  -2   1 5641.44  366.76
   0  -2   1 5475.95  366.26
   0  -2   1 5613.54  366.56
   0  -2   1 5875.21  366.76
   0  -2   1 5761.02  366.86
   0  -2   1 5481.45  367.56
   0  -2   1 5416.96  366.96
  -1   2  -1  703.83   44.50
  -1   2  -1  700.73   46.00
  -1   2  -1  650.33   44.50
  -1   2  -1  668.03   45.50
  -1   2  -1  655.83   45.60
  -1   2  -1  683.63   45.50
  -1   2  -1  633.14   45.50
  -1   2  -1  648.04   44.50
  -1   2  -1  660.53   44.90
  -1   2  -1  718.73   46.30
  -1   2  -1  669.03   45.40
   1  -2   1  681.43   45.30
   1  -2   1  632.74   44.60
   1  -2   1  683.83   44.60
   1  -2   1  683.93   44.20
   1  -2   1  687.93   44.50
   1  -2   1  704.83   45.50
   1  -2   1  548.85   45.40
   1  -2   1  605.24   45.90
   1  -2   1  669.53   44.90
   1  -2   1  661.13   45.60
   1  -2   1  664.23   46.20
   1  -2   1  679.13   45.80
  -2   2  -1  158.18   14.70
  -2   2  -1  183.18   14.00
  -2   2  -1  152.88   13.00
  -2   2  -1  157.08   11.60
  -2   2  -1  161.28   13.10
  -2   2  -1  169.68   12.60
  -2   2  -1  108.79   13.30
  -2   2  -1  148.99   14.50
  -2   2  -1  153.28   11.80
  -2   2  -1  144.59   13.20
   2  -2   1  161.98   11.90
   2  -2   1  174.38   13.40
   2  -2   1  181.18   12.10
   2  -2   1  157.78   13.20
   2  -2   1  163.68   12.90
   2  -2   1  140.59   13.80
   2  -2   1  130.89   14.10
   2  -2   1  168.48   11.60
   2  -2   1  127.19   13.50
   2  -2   1  158.28   12.80
   2  -2   1  172.68   12.60
   2  -2   1  185.28   13.40
   2  -2   1  149.79   12.40
  -3   2  -1  591.34   42.80
  -3   2  -1  594.04   40.70
  -3   2  -1  627.14   43.40
  -3   2  -1  589.04   41.80
  -3   2  -1  580.34   42.70
  -3   2  -1  581.14   42.60
  -3   2  -1  621.04   41.00
   3  -2   1  587.14   41.00
   3  -2   1  571.34   43.10
   3  -2   1  660.93   43.20
   3  -2   1  625.04   40.70
   3  -2   1  668.03   42.20
   3  -2   1  593.74   41.80
   3  -2   1  608.94   42.30
   3  -2   1  704.33   43.30
   3  -2   1  625.44   42.00
   3  -2   1  559.64   44.40
   3  -2   1  470.15   42.70
   3  -2   1  575.54   42.70
  -4   2  -1  431.76   30.60
  -4   2  -1  426.86   30.80
  -4   2  -1  382.76   28.00
  -4   2  -1  357.56   29.90
  -4   2  -1  304.67   31.80
  -4   2  -1  392.36   31.00
  -4   2  -1  401.06   29.60
  -4   2  -1  437.36   28.60
   4  -2   1  400.36   30.30
   4  -2   1  423.26   32.90
   4  -2   1  403.86   30.60
   4  -2   1  387.16   28.40
   4  -2   1  418.56   29.30
   4  -2   1  434.76   29.70
   4  -2   1  438.16   30.80
   4  -2   1  401.06   28.10
   4  -2   1  393.86   29.70
   4  -2   1  382.76   31.00
  -5   2  -1  208.58   18.70
  -5   2  -1  155.08   22.70
  -5   2  -1  209.08   18.20
  -5   2  -1  226.18   16.60
  -5   2  -1  237.58   19.70
  -5   2  -1  234.08   20.10
  -5   2  -1  191.78   18.70
   5  -2   1  225.88   21.30
   5  -2   1  235.08   19.90
   5  -2   1  240.58   17.70
   5  -2   1  212.18   17.80
   5  -2   1  224.58   17.00
   5  -2   1  189.58   16.40
   5  -2   1  191.58   18.60
   5  -2   1  222.78   18.30
   5  -2   1  220.78   18.30
   5  -2   1  241.18   19.40
  -6   2  -1  742.73   59.89
  -6   2  -1  818.62   61.29
  -6   2  -1  849.52   57.49
  -6   2  -1  862.81   61.19
  -6   2  -1  813.22   61.59
  -6   2  -1  771.32   59.29
   6  -2   1  854.11   59.29
   6  -2   1  873.21   58.99
   6  -2   1  772.72   60.19
   6  -2   1  824.12   57.89
   6  -2   1  874.61   60.69
   6  -2   1  858.31   59.29
   6  -2   1  928.41   61.09
   6  -2   1  810.22   57.59
   6  -2   1  893.81   63.29
   6  -2   1  870.31   58.29
  -7   2  -1   -6.60    4.70
  -7   2  -1    0.20    3.50
  -7   2  -1    5.00    4.50
  -7   2  -1    0.90    6.60
  -7   2  -1    2.00    4.50
  -7   2  -1    1.90    2.50
  -7   2  -1   -3.30    3.40
   7  -2   1    5.00    2.80
   7  -2   1    2.20    4.00
   7  -2   1    3.30    3.40
   7  -2   1    1.40    2.80
   7  -2   1   -0.40    2.40
   7  -2   1    4.20    3.90
   7  -2   1    0.80    2.70
   7  -2   1    2.20    2.70
   7  -2   1   11.50    6.40
  -8   2  -1  883.21   65.79
  -8   2  -1  889.71   63.79
  -8   2  -1  907.81   67.49
  -8   2  -1  626.74   67.59
  -8   2  -1  870.41   66.49
  -8   2  -1  808.92   60.59
   8  -2   1  955.30   67.09
   8  -2   1  876.71   61.19
   8  -2   1  997.50   62.99
   8  -2   1  928.81   62.89
   8  -2   1  854.51   61.39
   8  -2   1  797.72   63.69
   8  -2   1  914.61   60.29
  -9   2  -1   11.00   10.00
  -9   2  -1   23.70    5.80
  -9   2  -1   15.20    6.60
  -9   2  -1    9.60    8.80
  -9   2  -1   40.10   10.80
  -9   2  -1   15.00    7.80
  -9   2  -1   26.10    9.70
   9  -2   1   29.00    6.90
   9  -2   1   15.60    6.50
   9  -2   1   33.40    5.80
   9  -2   1   26.20    4.20
 -10   2  -1   85.39   14.00
 -10   2  -1   69.99   18.80
 -10   2  -1   75.09   15.90
 -10   2  -1   72.59   18.00
  10  -2   1   73.89   12.70
 -11   2  -1  229.88   37.70
 -11   2  -1  309.37   28.20
 -11   2  -1  198.08   34.30
  11  -2   1  320.97   26.60
 -12   2  -1   15.90   12.80
 -12   2  -1   28.90    9.60
 -12   2  -1    4.10   12.00
  12  -2   1   37.90   13.70
  12  -2   1   31.30    7.80
 -13   2  -1  136.19   20.10
 -13   2  -1   76.99   22.50
 -13   2  -1   37.90   19.30
  13  -2   1  119.49   22.20
 -14   2  -1   -0.10   11.90
 -14   2  -1    1.90   15.20
 -14  -1   1    3.20   12.90
 -14  -1   1    2.00   11.50
 -13  -1   1  183.68   23.90
 -13  -1   1  133.09   28.80
 -13  -1   1  130.29   30.50
  12   1  -1   30.60   10.00
 -12  -1   1    3.70   10.10
 -12  -1   1    5.20    6.50
 -12  -1   1    5.70   10.30
  11   1  -1  176.38   21.30
  11   1  -1  114.39   13.60
 -11  -1   1  117.09   25.20
 -11  -1   1   78.79   20.20
 -11  -1   1  128.39   17.80
 -11  -1   1  124.99   20.20
  10   1  -1  156.68   19.40
  10   1  -1  115.19   14.80
 -10  -1   1  129.79   24.30
 -10  -1   1  142.79   23.30
 -10  -1   1  134.99   19.70
 -10  -1   1  137.79   14.50
 -10  -1   1  102.49   21.30
   9   1  -1   57.19    9.60
  -9  -1   1   49.70   13.70
  -9  -1   1   46.50    7.70
  -9  -1   1   51.09   13.00
  -9  -1   1   81.89   18.10
  -9  -1   1   52.29   10.60
  -9  -1   1   57.49   12.00
   8   1  -1  385.56   31.20
   8   1  -1  423.16   30.70
   8   1  -1  408.16   27.10
   8   1  -1  410.26   32.20
   8   1  -1  417.26   29.80
  -8  -1   1  332.37   34.80
  -8  -1   1  377.06   33.10
  -8  -1   1  358.06   35.30
  -8  -1   1  404.26   32.30
  -8  -1   1  342.57   36.10
  -8  -1   1  404.66   29.70
   7   1  -1  367.56   30.30
   7   1  -1  447.76   32.00
   7   1  -1  418.76   30.60
   7   1  -1  386.66   28.00
   7   1  -1  379.16   26.80
   7   1  -1  401.16   28.90
   7   1  -1  411.66   28.20
   7   1  -1  426.46   30.10
  -7  -1   1  344.17   28.40
  -7  -1   1  352.16   33.30
  -7  -1   1  383.06   30.70
  -7  -1   1  356.36   33.50
  -7  -1   1  384.06   35.00
  -7  -1   1  386.16   31.90
   6   1  -1  625.24   43.20
   6   1  -1  610.14   42.10
   6   1  -1  685.53   46.10
   6   1  -1  667.03   45.20
   6   1  -1  644.34   43.40
   6   1  -1  603.64   44.80
   6   1  -1  656.53   44.60
   6   1  -1  633.04   42.90
   6   1  -1  681.63   43.50
  -6  -1   1  540.45   45.30
  -6  -1   1  595.44   43.10
  -6  -1   1  545.55   46.90
  -6  -1   1  610.74   44.70
  -6  -1   1  588.74   47.20
  -6  -1   1  579.24   48.10
   5   1  -1  209.78   18.30
   5   1  -1  228.28   16.60
   5   1  -1  222.58   18.10
   5   1  -1  210.08   17.30
   5   1  -1  255.87   17.10
   5   1  -1  227.78   17.20
   5   1  -1  256.47   19.60
   5   1  -1  234.38   18.30
   5   1  -1  255.87   17.80
  -5  -1   1  208.48   18.80
  -5  -1   1  219.28   17.20
  -5  -1   1  246.88   18.50
  -5  -1   1  225.38   20.90
  -5  -1   1  191.58   19.60
  -5  -1   1  217.38   20.00
   4   1  -1  236.58   17.50
   4   1  -1  197.18   15.90
   4   1  -1  216.48   16.40
   4   1  -1  219.48   17.70
   4   1  -1  248.08   17.40
   4   1  -1  208.78   16.40
   4   1  -1  210.58   15.70
   4   1  -1  205.78   15.60
   4   1  -1  211.98   16.90
   4   1  -1  258.57   17.20
  -4  -1   1  210.68   17.60
  -4  -1   1  200.58   18.30
  -4  -1   1  231.68   16.90
  -4  -1   1  205.58   17.40
  -4  -1   1  205.18   16.00
  -4  -1   1  236.28   18.50
  -4  -1   1  219.88   18.90
   3   1  -1  825.52   54.09
   3   1  -1  773.42   53.29
   3   1  -1  837.32   54.39
   3   1  -1  776.72   53.59
   3   1  -1  832.72   54.69
   3   1  -1  789.72   52.99
   3   1  -1  825.72   53.69
   3   1  -1  808.32   54.29
  -3  -1   1  824.62   54.79
  -3  -1   1  760.02   55.19
  -3  -1   1  826.02   54.29
  -3  -1   1  794.72   54.49
  -3  -1   1  813.72   55.49
  -3  -1   1  740.23   53.29
  -3  -1   1  718.93   54.19
  -3  -1   1  821.92   53.79
   2   1  -1  261.17   17.50
   2   1  -1  252.67   16.80
   2   1  -1  244.18   17.40
   2   1  -1  234.28   16.70
   2   1  -1  227.38   16.50
   2   1  -1  227.08   16.20
   2   1  -1  238.28   17.00
  -2  -1   1  238.78   17.20
  -2  -1   1  240.08   16.90
  -2  -1   1  219.68   16.50
  -2  -1   1  257.07   17.30
  -2  -1   1  212.58   17.70
  -2  -1   1  246.68   17.70
  -2  -1   1  228.58   16.60
   1   1  -1 1189.98   77.59
   1   1  -1 1254.77   77.49
   1   1  -1 1146.19   77.69
   1   1  -1 1137.59   78.29
  -1  -1   1 1130.69   77.99
  -1  -1   1 1229.58   77.39
  -1  -1   1 1094.39   77.69
  -1  -1   1 1094.59   77.39
  -1  -1   1 1241.18   77.79
  -1  -1   1 1237.78   78.09
  -1  -1   1 1240.58   77.59
  -1   1  -1    5.50    2.20
  -1   1  -1    3.30    1.30
  -1   1  -1    6.20    1.70
  -1   1  -1    5.90    2.30
  -1   1  -1    3.80    1.50
  -1   1  -1    4.00    1.40
  -1   1  -1    3.50    1.20
  -1   1  -1    4.20    1.20
  -1   1  -1    7.00    2.10
  -1   1  -1   11.90    3.20
  -1   1  -1    6.30    2.50
   1  -1   1    4.30    1.60
   1  -1   1    2.80    2.40
   1  -1   1    0.10    0.60
   1  -1   1    6.00    1.70
   1  -1   1    4.20    2.60
   1  -1   1   19.10    2.70
   1  -1   1    2.80    2.30
   1  -1   1    5.20    1.20
   1  -1   1    5.00    1.10
   1  -1   1    3.50    1.30
   1  -1   1    4.70    1.40
   1  -1   1    3.80    1.50
  -2   1  -1  500.45   32.70
  -2   1  -1  512.15   34.20
  -2   1  -1  461.65   35.20
  -2   1  -1  475.25   34.10
  -2   1  -1  510.55   33.40
  -2   1  -1  497.75   34.40
  -2   1  -1  489.05   32.90
  -2   1  -1  540.75   34.20
  -2   1  -1  505.15   34.30
   2  -1   1  474.95   34.10
   2  -1   1  440.06   34.70
   2  -1   1  480.25   33.30
   2  -1   1  473.95   33.90
   2  -1   1  478.15   32.90
   2  -1   1  373.36   34.70
   2  -1   1  495.05   33.60
   2  -1   1  539.45   34.30
   2  -1   1  498.65   32.70
   2  -1   1  497.45   34.20
  -3   1  -1   11.70    2.40
  -3   1  -1    8.50    2.90
  -3   1  -1    9.30    2.80
  -3   1  -1    8.20    2.80
  -3   1  -1    4.10    3.80
  -3   1  -1    8.60    2.00
  -3   1  -1   18.50    5.50
  -3   1  -1    4.50    2.50
  -3   1  -1    5.20    2.50
   3  -1   1    9.80    3.10
   3  -1   1    8.40    2.90
   3  -1   1   11.80    3.80
   3  -1   1   14.20    4.80
   3  -1   1    9.90    2.10
   3  -1   1   11.20    2.80
   3  -1   1   13.30    4.10
   3  -1   1   10.90    2.80
   3  -1   1    8.30    2.90
   3  -1   1    9.30    2.20
   3  -1   1   10.30    3.10
  -4   1  -1  285.97   29.90
  -4   1  -1  369.56   26.50
  -4   1  -1  396.26   28.70
  -4   1  -1  351.06   28.10
  -4   1  -1  391.56   29.20
  -4   1  -1  399.26   27.90
   4  -1   1  393.96   28.90
   4  -1   1  395.76   27.80
   4  -1   1  383.86   28.40
   4  -1   1  364.16   29.40
   4  -1   1  413.06   28.20
   4  -1   1  380.16   26.70
   4  -1   1  373.26   26.80
   4  -1   1  389.66   29.00
   4  -1   1  399.56   30.90
   4  -1   1  387.56   28.80
   4  -1   1  378.66   28.80
  -5   1  -1  537.75   39.10
  -5   1  -1  436.06   43.40
  -5   1  -1  586.24   40.90
  -5   1  -1  550.94   42.20
  -5   1  -1  628.84   42.10
   5  -1   1  535.15   41.70
   5  -1   1  577.24   40.30
   5  -1   1  622.54   42.90
   5  -1   1  548.45   41.10
   5  -1   1  610.44   42.10
   5  -1   1  561.04   39.50
   5  -1   1  579.84   44.00
   5  -1   1  596.74   41.00
   5  -1   1  575.84   41.30
   5  -1   1  571.64   39.40
  -6   1  -1   71.99    9.50
  -6   1  -1   58.59   10.50
  -6   1  -1   70.79   10.50
  -6   1  -1   60.79    7.40
  -6   1  -1   42.90   11.50
  -6   1  -1   50.59   11.70
  -6   1  -1   48.10    9.30
   6  -1   1   60.39    7.70
   6  -1   1   62.39    8.80
   6  -1   1   73.19   10.00
   6  -1   1   71.19    8.00
   6  -1   1   65.89    8.40
   6  -1   1   54.29    9.50
   6  -1   1   78.49   11.30
   6  -1   1   79.59   10.00
   6  -1   1   57.89   11.50
   6  -1   1   67.79   10.20
  -7   1  -1  204.48   20.10
  -7   1  -1  185.58   16.10
  -7   1  -1  218.68   22.40
  -7   1  -1  202.18   20.60
  -7   1  -1  195.58   18.20
  -7   1  -1  148.19   23.70
  -7   1  -1  138.29   22.00
   7  -1   1  237.48   22.30
   7  -1   1  212.78   18.10
   7  -1   1  208.38   17.40
   7  -1   1  190.28   16.60
   7  -1   1  235.48   19.80
   7  -1   1  216.08   17.00
   7  -1   1  180.48   16.30
   7  -1   1  214.38   18.20
   7  -1   1  189.58   18.90
  -8   1  -1  160.88   20.30
  -8   1  -1  104.99   21.70
  -8   1  -1  116.19   21.30
  -8   1  -1  166.98   18.90
  -8   1  -1  178.18   21.60
  -8   1  -1  191.58   15.40
  -8   1  -1  142.49   21.60
   8  -1   1  178.88   16.40
   8  -1   1  175.88   22.60
   8  -1   1  195.28   17.20
   8  -1   1  189.58   18.40
   8  -1   1  183.88   15.40
   8  -1   1  186.48   15.20
   8  -1   1  168.78   15.60
  -9   1  -1    7.80    6.10
  -9   1  -1   20.80    6.90
  -9   1  -1   14.10    9.40
  -9   1  -1   12.40    7.30
  -9   1  -1   22.70    5.20
  -9   1  -1   15.00    6.90
  -9   1  -1   16.20   10.50
   9  -1   1   26.80    6.60
   9  -1   1   17.40    5.10
   9  -1   1   21.00    5.90
   9  -1   1   19.40    7.00
   9  -1   1   22.20    4.50
 -10   1  -1   -3.60    4.10
 -10   1  -1   24.70    9.30
 -10   1  -1   10.40    6.60
 -10   1  -1    7.40    9.20
 -10   1  -1    7.70    9.10
 -10   1  -1    7.10    6.60
 -10   1  -1   11.10    4.60
  10  -1   1    7.50    3.50
  10  -1   1   13.10    2.60
  10  -1   1    7.20    5.30
 -11   1  -1   17.00   11.30
 -11   1  -1   -5.10    7.30
 -11   1  -1   20.30    8.10
 -11   1  -1    4.80    7.50
  11  -1   1    7.80    6.30
 -12   1  -1  315.47   29.30
 -12   1  -1  208.08   38.20
 -12   1  -1  222.08   36.20
  12  -1   1  345.97   27.80
 -13   1  -1   44.60   20.00
 -13   1  -1   27.20   16.10
 -13   1  -1   73.29   15.00
  13  -1   1  101.19   20.10
  13  -1   1   89.89   11.50
 -14   1  -1   36.90   17.20
 -14   1  -1   35.50   19.80
 -14   0   1  133.59   30.80
 -14   0   1  100.89   26.80
 -13   0   1   65.39   14.40
 -13   0   1   52.19   19.90
 -13   0   1   32.80   17.30
  12   0  -1   12.20    8.20
 -12   0   1    7.30   10.60
 -12   0   1   -3.30   10.60
 -12   0   1   12.30    7.30
  11   0  -1  279.27   18.80
  11   0  -1  256.57   29.30
 -11   0   1  172.38   32.40
 -11   0   1  242.88   30.40
 -11   0   1  163.18   30.20
 -11   0   1  257.47   28.20
  10   0  -1    5.80    3.60
  10   0  -1    5.50    5.80
 -10   0   1   11.80    9.30
 -10   0   1    2.10    3.40
 -10   0   1    1.70    5.20
 -10   0   1   -3.20    6.50
 -10   0   1    7.60    8.20
 -10   0   1    2.20    4.70
   9   0  -1  545.25   39.90
   9   0  -1  592.84   40.90
  -9   0   1  580.24   44.60
  -9   0   1  554.24   39.10
  -9   0   1  429.96   45.30
  -9   0   1  563.74   43.00
  -9   0   1  496.35   46.00
  -9   0   1  426.76   46.40
   8   0  -1  485.35   37.40
   8   0  -1  563.04   37.20
  -8   0   1  383.96   42.30
  -8   0   1  524.45   39.40
  -8   0   1  414.26   41.60
  -8   0   1  512.95   40.60
  -8   0   1  485.35   42.20
  -8   0   1  545.45   36.50
   7   0  -1   27.90    5.20
   7   0  -1   42.10    6.40
   7   0  -1   30.50    6.90
   7   0  -1   38.50    7.10
  -7   0   1   22.90    7.90
  -7   0   1   27.60    5.30
  -7   0   1   29.90    9.40
  -7   0   1   24.90    6.70
  -7   0   1   34.50    7.40
  -7   0   1   38.40   11.50
   6   0  -1  764.82   51.29
   6   0  -1  767.62   49.30
   6   0  -1  742.23   50.19
   6   0  -1  686.23   52.49
   6   0  -1  799.22   50.39
   6   0  -1  770.72   53.59
   6   0  -1  761.62   50.99
   6   0  -1  808.12   52.29
  -6   0   1  741.23   52.99
  -6   0   1  644.84   55.09
  -6   0   1  747.63   54.29
  -6   0   1  697.33   54.99
  -6   0   1  682.03   51.09
  -6   0   1  770.72   57.49
   5   0  -1  113.29    9.60
   5   0  -1  114.69   10.20
   5   0  -1  113.79   10.90
   5   0  -1  130.89    9.60
   5   0  -1  105.69    9.30
   5   0  -1  117.59   11.40
   5   0  -1  111.89    8.50
   5   0  -1  101.39   10.50
   5   0  -1  105.89    9.10
  -5   0   1   99.09   14.40
  -5   0   1  106.39    9.60
  -5   0   1  119.09   10.90
  -5   0   1  103.59   13.10
  -5   0   1  117.99   11.60
  -5   0   1  130.79   15.20
   4   0  -1  343.07   23.00
   4   0  -1  303.37   21.00
   4   0  -1  274.27   21.90
   4   0  -1  329.37   22.50
   4   0  -1  310.87   20.90
   4   0  -1  289.47   20.80
   4   0  -1  309.37   21.70
   4   0  -1  299.57   20.20
   4   0  -1  292.27   20.80
  -4   0   1  297.77   21.90
  -4   0   1  292.47   24.20
  -4   0   1  289.97   22.70
  -4   0   1  289.57   23.10
  -4   0   1  290.07   23.40
  -4   0   1  285.67   22.70
  -4   0   1  248.68   20.80
   3   0  -1   34.40    4.20
   3   0  -1   31.70    4.50
   3   0  -1   31.90    2.90
   3   0  -1   27.30    3.40
   3   0  -1   34.30    3.30
   3   0  -1   40.40    4.10
   3   0  -1   37.10    4.80
   3   0  -1   38.10    3.50
  -3   0   1   29.70    3.80
  -3   0   1   32.70    4.20
  -3   0   1   27.40    4.40
  -3   0   1   33.80    4.90
  -3   0   1   40.40    6.20
  -3   0   1   40.00    5.10
  -3   0   1   28.60    4.80
  -3   0   1   43.10    5.80
   2   0  -1 1607.84  107.19
   2   0  -1 1655.53  107.09
   2   0  -1 1723.23  107.39
   2   0  -1 1561.74  107.19
   2   0  -1 1590.24  106.69
   2   0  -1 1609.84  106.79
  -2   0   1 1639.54  107.69
  -2   0   1 1745.73  107.59
  -2   0   1 1827.22  108.39
  -2   0   1 1580.44  106.89
  -2   0   1 1543.85  107.59
  -2   0   1 1526.25  107.29
  -2   0   1 1618.74  106.99
  -2   0   1 1651.93  107.79
   1   0  -1 1041.70   82.89
   1   0  -1 1325.97   82.39
  -1   0   1 1264.07   82.49
  -1   0   1 1188.88   82.59
  -1   0   1 1317.27   82.99
  -1   0   1 1297.47   82.59
  -1   0   1 1375.06   82.69
  -1   0   1 1297.17   82.59
  -1   0   1 1264.77   82.39
   0   0  -1    0.00    0.10
   0   0  -1    0.00    0.10
   0   0   1   -0.20    0.10
   0   0   1    0.00    0.10
  -2   0  -1  251.67   18.70
  -2   0  -1  185.78   17.90
  -2   0  -1  222.28   17.60
  -2   0  -1  244.28   17.60
  -2   0  -1  231.28   17.10
  -2   0  -1  259.17   17.80
  -2   0  -1  177.18   18.10
  -2   0  -1  243.48   17.50
   2   0   1  283.87   17.90
   2   0   1  253.97   17.70
   2   0   1  266.77   17.60
   2   0   1  273.87   17.90
   2   0   1  248.58   16.50
   2   0   1  239.78   18.30
   2   0   1  264.47   17.80
   2   0   1  225.08   18.70
   2   0   1  194.08   18.00
  -3   0  -1  763.22   50.49
  -3   0  -1  713.83   50.29
  -3   0  -1  564.14   51.09
  -3   0  -1  688.03   48.50
  -3   0  -1  753.02   52.79
  -3   0  -1  759.22   49.99
   3   0   1  789.32   50.19
   3   0   1  705.83   48.70
   3   0   1  775.82   50.99
   3   0   1  717.83   48.70
   3   0   1  713.83   50.29
   3   0   1  749.13   51.99
   3   0   1  740.43   50.29
   3   0   1  741.13   50.39
   3   0   1  703.43   51.09
   3   0   1  777.42   50.29
  -4   0  -1  795.32   66.59
  -4   0  -1  894.91   62.89
  -4   0  -1  914.91   65.19
  -4   0  -1  936.31   64.69
  -4   0  -1  961.50   65.39
   4   0   1  907.71   64.79
   4   0   1 1045.70   65.09
   4   0   1  911.11   65.19
   4   0   1  990.90   64.99
   4   0   1  993.70   64.29
   4   0   1  913.31   63.09
   4   0   1 1032.30   67.49
   4   0   1  963.60   66.09
   4   0   1  931.51   63.19
   4   0   1  935.61   65.19
   4   0   1  973.00   65.29
  -5   0  -1   -0.70    3.40
  -5   0  -1    3.10    4.20
  -5   0  -1   -0.50    1.80
  -5   0  -1    0.70    1.40
  -5   0  -1    3.00    1.80
  -5   0  -1    3.40    2.70
   5   0   1    1.30    2.60
   5   0   1    1.00    1.80
   5   0   1   -0.50    1.20
   5   0   1    1.10    2.20
   5   0   1    5.90    3.60
   5   0   1    0.20    2.10
   5   0   1   -0.10    1.80
   5   0   1    0.70    1.90
   5   0   1   -2.70    1.50
   5   0   1    1.60    2.50
   5   0   1    2.70    4.00
  -6   0  -1   70.09    7.60
  -6   0  -1   61.89   12.60
  -6   0  -1   67.69    9.80
  -6   0  -1   55.49    9.40
  -6   0  -1   40.40   10.10
   6   0   1   56.49    9.40
   6   0   1   63.29    9.10
   6   0   1   60.59    7.50
   6   0   1   66.89   10.30
   6   0   1   72.99    8.10
   6   0   1   61.19    9.40
   6   0   1   59.09    8.10
   6   0   1   76.49   10.10
  -7   0  -1  108.89   14.10
  -7   0  -1   69.19   10.40
  -7   0  -1   48.10   12.80
  -7   0  -1   93.99   12.90
  -7   0  -1   47.40   12.20
  -7   0  -1   82.69    9.20
   7   0   1   92.29   12.50
   7   0   1   77.79   11.00
   7   0   1   93.79   10.20
   7   0   1   83.99   12.30
   7   0   1   72.99    9.10
   7   0   1   72.59   10.40
   7   0   1   88.59   10.30
   7   0   1   86.19   11.10
  -8   0  -1  104.79   12.00
  -8   0  -1   91.99   17.60
  -8   0  -1  117.29   14.40
  -8   0  -1  104.19   15.90
  -8   0  -1   89.59   18.60
  -8   0  -1  139.89   17.20
   8   0   1  132.29   12.00
   8   0   1  118.29   16.10
   8   0   1  129.39   12.50
   8   0   1  126.09   15.90
   8   0   1  103.49   12.60
   8   0   1  113.89   14.30
   8   0   1  136.49   15.10
  -9   0  -1   70.89   18.20
  -9   0  -1   64.59   16.30
  -9   0  -1  114.89   14.90
  -9   0  -1  107.69   12.10
  -9   0  -1  136.19   18.40
  -9   0  -1  133.19   17.70
   9   0   1  113.79   13.10
   9   0   1  102.09   15.40
   9   0   1   96.19   12.80
   9   0   1  110.29   12.00
   9   0   1  119.09   14.50
   9   0   1  117.49   22.60
 -10   0  -1    1.80    4.70
 -10   0  -1    1.40    3.10
 -10   0  -1   -5.00    4.60
 -10   0  -1    7.80    8.90
 -10   0  -1   -2.70    3.70
 -10   0  -1    2.00    5.70
 -10   0  -1    2.80    7.70
  10   0   1    8.60    4.50
  10   0   1    6.20    5.20
  10   0   1    2.70    3.40
  10   0   1   -3.70    2.00
 -11   0  -1  220.58   23.80
 -11   0  -1  234.08   28.10
 -11   0  -1  127.49   27.90
 -11   0  -1  123.89   25.50
  11   0   1  211.68   21.00
 -12   0  -1  104.39   23.60
 -12   0  -1   79.19   22.30
 -12   0  -1  102.99   16.80
  12   0   1  133.89   17.80
 -13   0  -1  213.68   26.10
 -13   0  -1  131.99   28.80
 -13   0  -1  128.69   30.90
  13   0   1  216.38   20.50
  13   0   1  227.68   29.90
 -14   0  -1   49.80   20.40
 -14   0  -1   32.20   16.50
 -15   0  -1   -7.30   11.00
 -14   1   1   70.29   25.20
 -14   1   1   92.79   25.50
 -13   1   1   30.20   17.10
 -13   1   1   21.00   14.20
  12  -1  -1  236.38   30.20
 -12   1   1  212.48   37.30
 -12   1   1  300.67   31.00
 -12   1   1  157.08   31.90
  11  -1  -1    2.60    6.80
 -11   1   1   -5.40    9.10
 -11   1   1   -0.80    5.60
 -11   1   1    9.80   10.80
 -11   1   1    5.00    6.30
  10  -1  -1  446.66   32.20
  10  -1  -1  455.15   37.50
  10  -1  -1  423.96   29.50
 -10   1   1  449.36   43.40
 -10   1   1  308.77   43.90
 -10   1   1  383.96   34.70
 -10   1   1  427.86   38.00
 -10   1   1  396.26   31.20
 -10   1   1  273.57   40.80
   9  -1  -1  387.26   28.80
   9  -1  -1  403.36   29.40
   9  -1  -1  408.96   34.30
  -9   1   1  285.47   34.80
  -9   1   1  374.06   34.00
  -9   1   1  394.36   32.40
  -9   1   1  381.16   35.90
  -9   1   1  385.46   28.90
  -9   1   1  380.66   33.60
  -9   1   1  286.57   40.20
   8  -1  -1   68.99    9.40
   8  -1  -1   61.89    9.50
  -8   1   1   36.90   12.90
  -8   1   1   49.90    9.80
  -8   1   1   66.19   12.00
  -8   1   1   62.09   11.10
  -8   1   1   60.69    8.40
  -8   1   1   52.29   13.40
  -8   1   1   68.69   13.50
   7  -1  -1  174.58   18.00
   7  -1  -1  248.68   18.00
   7  -1  -1  211.58   17.00
   7  -1  -1  217.28   18.30
  -7   1   1  213.68   19.70
  -7   1   1  212.68   21.60
  -7   1   1  180.08   24.10
  -7   1   1  238.28   28.80
  -7   1   1  241.98   21.20
  -7   1   1  207.48   17.20
  -7   1   1  211.68   19.50
   6  -1  -1    0.40    1.70
   6  -1  -1    1.40    1.80
   6  -1  -1   -0.90    1.80
   6  -1  -1    5.60    2.60
   6  -1  -1    4.70    2.30
   6  -1  -1    0.40    1.90
  -6   1   1    2.60    3.50
  -6   1   1    3.20    5.00
  -6   1   1    0.50    2.60
  -6   1   1    2.50    2.90
  -6   1   1    1.00    4.90
  -6   1   1    1.90    2.20
   5  -1  -1 1202.78   81.59
   5  -1  -1 1208.68   81.59
   5  -1  -1 1371.96   84.49
   5  -1  -1 1238.18   82.29
   5  -1  -1 1302.47   83.19
   5  -1  -1 1200.18   82.89
  -5   1   1 1179.98   84.39
  -5   1   1 1276.07   83.49
  -5   1   1 1180.48   86.89
  -5   1   1 1171.78   81.69
  -5   1   1 1139.99   85.39
  -5   1   1 1223.08   84.59
   4  -1  -1  925.71   59.49
   4  -1  -1  948.41   61.39
   4  -1  -1  849.72   60.39
   4  -1  -1  918.61   59.39
   4  -1  -1  911.41   58.29
   4  -1  -1  894.21   59.89
   4  -1  -1  876.21   60.49
  -4   1   1  944.41   63.79
  -4   1   1  806.82   61.99
  -4   1   1  904.01   60.59
  -4   1   1  875.81   60.89
  -4   1   1  921.51   61.59
  -4   1   1  844.02   61.29
  -4   1   1  876.71   59.59
  -4   1   1  855.71   61.49
  -4   1   1  856.01   59.49
   3  -1  -1    8.60    2.10
   3  -1  -1    2.00    1.30
   3  -1  -1   10.10    2.70
   3  -1  -1    6.00    1.60
   3  -1  -1    6.30    1.70
   3  -1  -1   11.30    2.00
   3  -1  -1    7.00    2.00
  -3   1   1    9.70    3.20
  -3   1   1    7.00    2.00
  -3   1   1    9.20    2.00
  -3   1   1    6.10    2.20
  -3   1   1    7.10    2.40
  -3   1   1   11.60    3.00
  -3   1   1   11.40    2.70
  -3   1   1    6.70    2.30
  -3   1   1    3.00    2.70
  -3   1   1   10.10    2.00
   2  -1  -1 2323.07  156.98
   2  -1  -1 2368.86  157.38
   2  -1  -1 2393.26  157.18
   2  -1  -1 2510.35  158.18
   2  -1  -1 2576.34  157.58
   2  -1  -1 2303.87  156.98
   2  -1  -1 2282.97  157.28
  -2   1   1 2400.66  158.08
  -2   1   1 2428.36  157.18
  -2   1   1 2309.17  157.88
  -2   1   1 2362.66  157.18
  -2   1   1 2587.44  157.38
  -2   1   1 2575.84  157.88
  -2   1   1 2284.17  157.08
  -2   1   1 2378.16  157.68
  -2   1   1 2348.27  157.58
  -2   1   1 2521.55  158.78
  -2   1   1 2360.86  157.98
   1  -1  -1  629.74   45.50
   1  -1  -1  693.43   45.20
  -1   1   1  738.63   44.70
  -1   1   1  689.13   44.60
  -1   1   1  643.44   44.60
  -1   1   1  692.03   45.20
  -1   1   1  674.23   44.40
  -1   1   1  665.13   44.50
  -1   1   1  662.43   44.40
   0  -1  -1   -0.30    0.20
   0  -1  -1    0.00    0.20
   0  -1  -1    0.00    0.30
   0  -1  -1    0.10    0.20
   0   1   1    0.30    0.50
   0   1   1   -0.20    0.10
  -2  -1  -1  134.89   13.10
  -2  -1  -1  168.68   13.90
  -2  -1  -1  157.18   12.30
  -2  -1  -1  165.18   13.70
  -2  -1  -1  182.08   13.70
  -2  -1  -1  172.78   12.90
  -2  -1  -1  179.88   12.70
   2   1   1  175.88   12.60
   2   1   1  193.28   14.30
   2   1   1  179.08   13.50
   2   1   1  161.08   12.40
   2   1   1  171.28   13.60
   2   1   1  166.78   13.60
   2   1   1  171.28   12.90
   2   1   1  173.98   12.00
  -3  -1  -1 4061.09  279.87
  -3  -1  -1 3624.04  279.47
  -3  -1  -1 4629.54  278.77
  -3  -1  -1 4354.56  279.07
  -3  -1  -1 4168.28  278.37
  -3  -1  -1 4539.05  280.17
  -3  -1  -1 3894.61  280.27
   3   1   1 4220.38  279.87
   3   1   1 4538.15  280.77
   3   1   1 4398.76  279.47
   3   1   1 4373.76  277.67
   3   1   1 4493.15  279.77
   3   1   1 4235.78  279.07
   3   1   1 3965.10  278.37
   3   1   1 4326.97  279.17
  -4  -1  -1  101.59   10.30
  -4  -1  -1   86.59   12.00
  -4  -1  -1  111.09   13.40
  -4  -1  -1  118.69   10.30
  -4  -1  -1  102.89   13.50
  -4  -1  -1   99.79    8.70
   4   1   1  118.49   11.00
   4   1   1  110.09   13.60
   4   1   1  120.29   10.90
   4   1   1  123.99   10.90
   4   1   1  110.29    9.10
   4   1   1  100.79   10.30
   4   1   1  113.59   11.50
  -5  -1  -1 1362.76  106.49
  -5  -1  -1 1467.25  101.89
  -5  -1  -1 1486.65  104.49
  -5  -1  -1 1601.94  103.99
   5   1   1 1606.64  104.19
   5   1   1 1519.45  114.39
   5   1   1 1549.84  104.29
   5   1   1 1553.64  105.29
   5   1   1 1628.94  102.59
   5   1   1 1600.54  104.69
   5   1   1 1623.64  103.39
   5   1   1 1567.44  104.69
   5   1   1 1496.65  104.59
   5   1   1 1442.66  104.09
  -6  -1  -1  255.37   21.60
  -6  -1  -1  175.38   22.40
  -6  -1  -1  268.77   19.70
  -6  -1  -1  243.08   22.10
  -6  -1  -1  241.48   24.90
   6   1   1  282.77   19.90
   6   1   1  255.37   21.80
   6   1   1  281.97   20.30
   6   1   1  271.57   22.60
   6   1   1  269.67   22.10
   6   1   1  279.37   21.90
   6   1   1  274.27   20.90
   6   1   1  274.37   22.40
  -7  -1  -1   26.40    6.40
  -7  -1  -1   33.70   10.70
  -7  -1  -1   24.10    4.70
  -7  -1  -1   25.30    8.50
  -7  -1  -1   24.00    6.60
   7   1   1   30.20    6.60
   7   1   1   33.10    5.30
   7   1   1   29.20    5.50
   7   1   1   30.20    6.80
   7   1   1   22.10    5.30
   7   1   1   26.80    6.50
   7   1   1   16.60    5.80
   7   1   1   19.10    5.80
  -8  -1  -1  489.05   39.10
  -8  -1  -1  345.57   40.40
  -8  -1  -1  502.05   40.30
  -8  -1  -1  524.85   36.10
  -8  -1  -1  464.95   43.70
   8   1   1  482.65   37.30
   8   1   1  540.95   37.10
   8   1   1  472.75   38.10
   8   1   1  579.04   39.40
   8   1   1  482.95   39.50
   8   1   1  517.85   36.90
   8   1   1  502.95   36.20
   8   1   1  531.95   39.90
  -9  -1  -1   78.39   13.40
  -9  -1  -1   77.69   14.10
  -9  -1  -1   96.19   11.00
  -9  -1  -1   79.79   18.20
  -9  -1  -1   53.49   15.00
   9   1   1   98.99   13.20
   9   1   1  109.59   14.10
   9   1   1   95.59   14.70
   9   1   1   88.19   11.40
   9   1   1  100.59   11.50
 -10  -1  -1   89.59   13.10
 -10  -1  -1   91.39   16.00
 -10  -1  -1  101.99   19.60
 -10  -1  -1   84.49   15.00
 -10  -1  -1   57.99   15.90
 -10  -1  -1   54.29   16.70
 -10  -1  -1   89.29   11.20
  10   1   1   95.19   12.40
  10   1   1   95.39   13.30
  10   1   1   93.49   15.00
  10   1   1   74.69    9.80
 -11  -1  -1  105.09   18.60
 -11  -1  -1  137.79   21.10
 -11  -1  -1  117.39   16.60
 -11  -1  -1   65.89   18.30
 -11  -1  -1  100.99   23.70
  11   1   1  107.49   16.80
  11   1   1  133.79   10.90
  11   1   1  134.29   12.80
 -12  -1  -1   23.70   13.30
 -12  -1  -1   38.80    9.90
 -12  -1  -1   22.30   13.40
  12   1   1   26.00    9.00
 -13  -1  -1   32.10   15.90
 -13  -1  -1   60.99   19.90
 -13  -1  -1   50.69   12.80
  13   1   1   83.19   14.10
 -14  -1  -1   -0.10    6.50
 -14  -1  -1    6.50   12.50
 -14  -1  -1    1.10   12.20
  14   1   1    0.20    5.20
 -15  -1  -1   41.90   18.30
 -15  -1  -1   34.10   20.70
 -14   2   1   -3.90   14.90
 -14   2   1    8.20   13.30
 -13   2   1   44.50   19.50
 -13   2   1   21.80   15.10
  12  -2  -1   31.80   11.80
 -12   2   1   11.60   12.80
 -12   2   1    3.10   10.10
 -12   2   1   24.70    9.70
  11  -2  -1  330.67   35.70
 -11   2   1  321.37   36.40
 -11   2   1  223.18   35.50
 -11   2   1  205.08   36.00
 -11   2   1  281.57   30.90
  10  -2  -1  209.08   25.80
 -10   2   1  169.78   30.20
 -10   2   1  225.48   27.40
 -10   2   1  120.49   24.70
 -10   2   1  224.48   24.70
   9  -2  -1    1.40    2.20
   9  -2  -1    4.60    5.30
   9  -2  -1   -0.40    2.40
  -9   2   1   -2.70    6.30
  -9   2   1   -2.40    2.30
  -9   2   1   -7.20    6.30
  -9   2   1    3.20    4.80
  -9   2   1   -1.30    3.80
  -9   2   1    4.60    5.90
   8  -2  -1   63.99   12.50
   8  -2  -1   90.39   10.50
   8  -2  -1   71.49    9.30
  -8   2   1   84.49   13.40
  -8   2   1   78.59    9.60
  -8   2   1   80.19   17.10
  -8   2   1   58.89   13.10
  -8   2   1   51.69   14.50
  -8   2   1   73.39   12.50
  -8   2   1   83.39   13.90
   7  -2  -1   80.49   10.30
   7  -2  -1   63.79    9.00
   7  -2  -1   82.39    9.30
  -7   2   1   72.89   12.10
  -7   2   1   84.49   12.30
  -7   2   1   84.79   13.30
  -7   2   1   61.69   14.10
  -7   2   1   73.79   11.60
  -7   2   1   67.59    8.70
  -7   2   1   70.89   15.20
   6  -2  -1   76.69    9.00
   6  -2  -1   97.79   11.10
   6  -2  -1   92.49    9.00
   6  -2  -1   85.29   10.20
   6  -2  -1   82.69    9.90
  -6   2   1   63.49   13.00
  -6   2   1   94.99   12.00
  -6   2   1   75.09   10.90
  -6   2   1   91.59   12.60
  -6   2   1   63.79   10.70
  -6   2   1   74.49   11.60
  -6   2   1   83.39    9.10
  -6   2   1   76.09   14.80
   5  -2  -1  152.08   13.00
   5  -2  -1  135.19   12.10
   5  -2  -1  159.48   13.40
   5  -2  -1  132.09   12.50
   5  -2  -1  160.58   12.00
   5  -2  -1  151.18   11.90
  -5   2   1  147.09   19.30
  -5   2   1  129.19   17.30
  -5   2   1  140.29   12.00
  -5   2   1  159.68   14.80
  -5   2   1  140.09   13.70
  -5   2   1  112.59   14.40
  -5   2   1  152.78   14.40
  -5   2   1  177.18   14.20
  -5   2   1  156.48   12.40
   4  -2  -1  417.66   28.00
   4  -2  -1  386.96   27.20
   4  -2  -1  397.56   29.00
   4  -2  -1  381.56   26.70
   4  -2  -1  382.26   26.80
   4  -2  -1  326.57   27.70
   4  -2  -1  381.96   27.70
  -4   2   1  410.76   28.90
  -4   2   1  318.07   29.40
  -4   2   1  406.16   29.00
  -4   2   1  394.36   29.10
  -4   2   1  361.96   31.10
  -4   2   1  385.56   26.90
  -4   2   1  394.16   28.20
  -4   2   1  398.26   27.20
  -4   2   1  407.96   29.40
   3  -2  -1 1120.09   75.89
   3  -2  -1 1066.09   76.49
   3  -2  -1 1221.48   77.19
   3  -2  -1 1179.68   76.79
   3  -2  -1 1142.39   75.79
   3  -2  -1 1175.88   77.89
   3  -2  -1 1171.38   76.39
  -3   2   1 1080.09   79.29
  -3   2   1 1188.28   77.99
  -3   2   1 1209.58   76.99
  -3   2   1 1134.59   76.29
  -3   2   1 1159.38   77.29
  -3   2   1 1161.88   77.79
  -3   2   1 1285.77   78.09
  -3   2   1 1123.99   77.39
  -3   2   1 1129.19   75.99
  -3   2   1 1110.29   77.79
  -3   2   1 1013.10   77.99
   2  -2  -1  565.14   38.10
   2  -2  -1  551.64   37.70
   2  -2  -1  612.24   38.60
   2  -2  -1  544.85   39.90
   2  -2  -1  580.24   38.40
   2  -2  -1  522.85   37.80
   2  -2  -1  588.84   39.40
   2  -2  -1  548.45   38.10
  -2   2   1  614.54   38.70
  -2   2   1  570.44   39.40
  -2   2   1  568.74   38.60
  -2   2   1  555.24   38.60
  -2   2   1  569.64   38.20
  -2   2   1  572.14   39.10
  -2   2   1  584.84   38.30
  -2   2   1  540.75   39.10
  -2   2   1  542.65   40.10
  -2   2   1  563.84   39.40
  -2   2   1  572.24   37.90
   1  -2  -1   31.70    4.50
   1  -2  -1   45.00    5.10
   1  -2  -1   41.10    3.40
   1  -2  -1   40.00    3.30
   1  -2  -1   36.70    5.10
   1  -2  -1   42.90    3.20
   1  -2  -1   45.90    3.50
   1  -2  -1   41.40    3.30
  -1   2   1   41.40    3.70
  -1   2   1   40.90    3.10
  -1   2   1   35.30    4.90
  -1   2   1   43.50    3.20
  -1   2   1   37.90    3.70
  -1   2   1   45.00    5.00
  -1   2   1   47.10    4.20
  -1   2   1   39.80    3.40
  -1   2   1   41.70    3.60
  -1   2   1   37.60    3.90
  -1   2   1   40.60    3.30
  -1   2   1   43.00    5.00
  -1   2   1   35.20    3.30
   0  -2  -1  735.73   45.40
   0  -2  -1  673.33   45.20
   0  -2  -1  674.63   45.10
   0  -2  -1  661.83   45.60
   0  -2  -1  666.93   45.00
   0  -2  -1  656.93   46.50
   0  -2  -1  720.43   46.50
   0  -2  -1  678.53   46.00
   0   2   1  692.73   46.60
   0   2   1  682.63   45.20
   0   2   1  765.02   45.80
   0   2   1  703.83   45.30
   0   2   1  680.73   45.90
   0   2   1  688.23   45.60
   0   2   1  699.73   46.40
   0   2   1  667.23   45.50
   0   2   1  673.63   45.70
  -1  -2  -1  145.09    9.90
  -1  -2  -1  147.69    9.70
  -1  -2  -1  125.19   10.70
  -1  -2  -1  120.09    9.60
  -1  -2  -1  112.29    9.60
  -1  -2  -1  128.89    9.90
  -1  -2  -1  117.39   10.20
  -1  -2  -1  143.49   10.20
  -1  -2  -1  139.79   10.20
  -1  -2  -1  146.29    9.70
  -1  -2  -1  139.59   10.60
  -1  -2  -1  153.48   10.80
   1   2   1  148.79   10.10
   1   2   1  138.89   10.60
   1   2   1  132.49    9.70
   1   2   1  139.59    9.80
   1   2   1  152.38   10.00
   1   2   1  149.59    9.90
   1   2   1  124.59   10.90
   1   2   1  150.98   10.10
   1   2   1  144.99   10.40
   1   2   1  150.18    9.70
   1   2   1  167.68   11.00
   1   2   1  137.59   10.50
  -2  -2  -1 1872.01  122.39
  -2  -2  -1 1574.84  122.39
  -2  -2  -1 1697.93  121.79
  -2  -2  -1 1799.22  120.39
  -2  -2  -1 2000.40  121.99
  -2  -2  -1 1804.22  121.39
  -2  -2  -1 1879.81  120.99
  -2  -2  -1 1810.42  120.79
  -2  -2  -1 1801.02  120.89
   2   2   1 1908.21  121.09
   2   2   1 1651.53  121.29
   2   2   1 1793.12  120.89
   2   2   1 1869.71  120.59
   2   2   1 1644.34  122.49
   2   2   1 2008.90  122.29
   2   2   1 1934.01  120.99
   2   2   1 1930.21  120.59
   2   2   1 2055.89  122.69
   2   2   1 1914.91  121.79
  -3  -2  -1 2837.02  180.08
  -3  -2  -1 2756.32  180.18
  -3  -2  -1 2481.55  179.88
  -3  -2  -1 2376.56  181.88
  -3  -2  -1 2705.43  180.68
  -3  -2  -1 2370.06  181.18
  -3  -2  -1 2965.80  181.68
  -3  -2  -1 2747.82  179.28
  -3  -2  -1 2780.92  182.18
   3   2   1 2810.52  181.68
   3   2   1 2681.63  180.78
   3   2   1 2871.81  180.28
   3   2   1 2800.22  179.28
   3   2   1 2590.04  181.88
   3   2   1 2833.02  180.28
   3   2   1 3080.29  182.58
   3   2   1 2873.61  181.18
   3   2   1 2765.92  179.48
  -4  -2  -1   31.60    5.00
  -4  -2  -1   28.30    3.80
  -4  -2  -1   18.80    4.30
  -4  -2  -1   28.80    6.30
  -4  -2  -1   25.40    6.30
  -4  -2  -1   43.10    7.70
   4   2   1   15.10    3.70
   4   2   1   32.00    5.20
   4   2   1   22.10    5.40
   4   2   1   22.10    6.00
   4   2   1   32.70    4.40
   4   2   1   35.80    6.00
   4   2   1   26.90    5.80
   4   2   1   33.40    6.10
   4   2   1   26.40    5.10
  -5  -2  -1 1268.77   94.59
  -5  -2  -1 1191.98   93.69
  -5  -2  -1 1327.47   90.29
  -5  -2  -1 1387.46   92.99
  -5  -2  -1 1475.05   92.29
  -5  -2  -1 1385.96   95.39
   5   2   1 1348.67   92.79
   5   2   1 1185.48   91.19
   5   2   1 1452.45   92.99
   5   2   1 1362.16   93.59
   5   2   1 1485.55   94.09
   5   2   1 1399.76   90.89
   5   2   1 1233.08   91.69
   5   2   1 1531.55   93.49
  -6  -2  -1   27.70    8.20
  -6  -2  -1   28.30    4.80
  -6  -2  -1   37.70    7.20
  -6  -2  -1   32.10    6.50
  -6  -2  -1   29.60    8.00
  -6  -2  -1   32.50    9.10
   6   2   1   31.30    7.00
   6   2   1   29.40    5.70
   6   2   1   47.50    8.00
   6   2   1   46.30    7.80
   6   2   1   41.60    7.80
   6   2   1   34.80    7.10
   6   2   1   34.90    5.60
  -7  -2  -1 1666.13  117.59
  -7  -2  -1 1744.13  114.09
  -7  -2  -1 1393.66  118.59
  -7  -2  -1 1529.85  119.79
  -7  -2  -1 1730.33  116.69
  -7  -2  -1 1622.94  120.99
   7   2   1 1716.53  117.09
   7   2   1 1902.71  115.89
   7   2   1 1757.92  117.89
   7   2   1 1776.12  114.89
   7   2   1 1769.92  116.59
   7   2   1 1824.92  117.89
  -8  -2  -1  292.37   33.20
  -8  -2  -1  240.48   20.00
  -8  -2  -1  249.68   22.90
  -8  -2  -1  201.78   27.70
  -8  -2  -1  227.08   23.20
  -8  -2  -1  232.28   29.20
   8   2   1  294.47   24.30
   8   2   1  269.97   24.00
   8   2   1  230.38   21.60
   8   2   1  298.07   21.80
   8   2   1  251.17   21.10
   8   2   1  304.77   24.20
   8   2   1  248.38   22.70
   8   2   1  263.67   20.50
  -9  -2  -1   67.19   12.10
  -9  -2  -1   52.69   14.80
  -9  -2  -1   33.60    6.50
  -9  -2  -1   49.50   10.30
  -9  -2  -1   33.30   11.70
  -9  -2  -1   57.99   14.40
   9   2   1   50.79    9.80
   9   2   1   45.00    7.60
   9   2   1   52.59    8.50
   9   2   1   50.79   10.70
   9   2   1   38.00    8.30
 -10  -2  -1   39.90   10.40
 -10  -2  -1   19.70   10.90
 -10  -2  -1   19.90    9.70
 -10  -2  -1   20.50    5.40
 -10  -2  -1   21.00   10.80
 -10  -2  -1   18.50    7.80
  10   2   1   28.30    7.70
  10   2   1   30.90    7.20
  10   2   1   31.10    6.20
  10   2   1   33.00    7.70
  10   2   1   28.20    8.90
 -11  -2  -1   -3.50    5.30
 -11  -2  -1   -4.00    6.80
 -11  -2  -1    4.00    6.30
 -11  -2  -1    6.60    8.90
  11   2   1    2.10    5.20
  11   2   1    0.80    3.10
  11   2   1   -0.40    3.40
 -12  -2  -1  123.99   26.20
 -12  -2  -1  129.19   17.80
 -12  -2  -1   81.29   21.00
  12   2   1  135.99   19.30
 -13  -2  -1   65.99   20.80
 -13  -2  -1  128.79   18.40
 -13  -2  -1  111.49   26.60
  13   2   1  108.49   17.10
 -14  -2  -1   46.70   19.20
 -14  -2  -1  116.39   18.80
 -14  -2  -1   94.89   24.70
  14   2   1   92.09   14.60
 -15  -2  -1   71.09   23.60
 -15  -2  -1   64.09   22.50
 -13   3   1   23.40   18.20
 -13   3   1   24.40   16.10
  12  -3  -1   19.80   11.20
 -12   3   1   25.60   14.40
 -12   3   1    2.70   12.00
 -12   3   1   23.70    9.70
  11  -3  -1  566.64   45.60
 -11   3   1  374.06   51.79
 -11   3   1  519.45   41.00
 -11   3   1  320.67   47.10
  10  -3  -1   28.90   10.30
 -10   3   1   22.20    8.20
 -10   3   1   26.60   13.00
 -10   3   1   37.40   11.60
 -10   3   1    9.50    9.90
   9  -3  -1  197.88   26.00
  -9   3   1  236.08   19.10
  -9   3   1  261.97   29.20
  -9   3   1  229.68   28.40
  -9   3   1  207.08   31.50
  -9   3   1  225.88   24.80
  -9   3   1  146.39   26.70
   8  -3  -1  170.48   13.10
   8  -3  -1  154.88   21.00
   8  -3  -1  164.98   12.80
  -8   3   1  153.88   20.70
  -8   3   1  104.19   22.30
  -8   3   1  136.59   18.40
  -8   3   1  127.69   18.60
  -8   3   1  134.09   19.90
  -8   3   1  108.69   20.60
  -8   3   1  148.49   13.80
   7  -3  -1  198.88   14.60
   7  -3  -1  141.09   13.20
   7  -3  -1  169.98   20.70
  -7   3   1  142.19   18.80
  -7   3   1  153.88   19.50
  -7   3   1  138.09   17.60
  -7   3   1  185.68   20.00
  -7   3   1  135.19   17.40
  -7   3   1  126.49   20.90
  -7   3   1  118.79   21.40
  -7   3   1  152.98   13.60
   6  -3  -1  488.15   33.50
   6  -3  -1  455.25   32.60
   6  -3  -1  467.65   32.50
   6  -3  -1  484.55   32.00
  -6   3   1  341.37   36.40
  -6   3   1  435.96   34.80
  -6   3   1  427.26   35.90
  -6   3   1  377.26   38.50
  -6   3   1  421.06   32.50
  -6   3   1  499.25   36.30
  -6   3   1  492.95   35.80
  -6   3   1  456.75   35.20
  -6   3   1  434.26   32.10
   5  -3  -1    0.00    1.70
   5  -3  -1   -1.80    1.80
   5  -3  -1   -0.20    1.50
   5  -3  -1    1.40    2.00
   5  -3  -1    2.30    2.00
   5  -3  -1    0.20    1.70
  -5   3   1    3.40    3.20
  -5   3   1   -0.40    2.40
  -5   3   1    0.20    2.30
  -5   3   1    4.00    2.20
  -5   3   1   -2.20    4.30
  -5   3   1   -5.50    2.00
  -5   3   1    5.60    2.50
  -5   3   1    1.40    2.70
  -5   3   1   -2.20    3.90
   4  -3  -1  484.05   32.40
   4  -3  -1  464.65   31.90
   4  -3  -1  457.55   32.60
   4  -3  -1  502.75   33.50
   4  -3  -1  498.85   33.10
   4  -3  -1  455.65   31.60
  -4   3   1  497.65   34.70
  -4   3   1  451.75   32.40
  -4   3   1  459.95   33.80
  -4   3   1  484.35   33.80
  -4   3   1  452.45   31.90
  -4   3   1  458.35   34.30
  -4   3   1  368.26   35.90
  -4   3   1  446.96   34.60
  -4   3   1  375.56   34.90
   3  -3  -1  870.11   60.29
   3  -3  -1 1019.50   61.89
   3  -3  -1  879.81   60.69
   3  -3  -1  875.91   60.89
   3  -3  -1  985.00   61.39
   3  -3  -1  906.51   60.49
   3  -3  -1  918.31   62.69
   3  -3  -1  898.01   60.09
  -3   3   1  912.21   60.89
  -3   3   1  964.50   61.79
  -3   3   1  861.61   62.39
  -3   3   1  918.51   62.19
  -3   3   1  888.21   62.59
  -3   3   1  830.12   62.39
  -3   3   1  858.41   60.29
  -3   3   1  799.22   63.99
  -3   3   1  959.60   61.89
   2  -3  -1   19.40    2.70
   2  -3  -1   14.20    2.60
   2  -3  -1   16.20    2.60
   2  -3  -1   18.60    2.40
   2  -3  -1   18.70    3.00
   2  -3  -1   24.30    4.40
   2  -3  -1   21.00    3.30
   2  -3  -1   20.10    4.20
   2  -3  -1   16.30    4.20
   2  -3  -1   24.60    3.90
  -2   3   1   23.10    4.20
  -2   3   1   18.90    3.30
  -2   3   1   13.30    4.00
  -2   3   1   16.50    2.50
  -2   3   1   12.50    4.40
  -2   3   1   20.00    4.40
  -2   3   1   23.30    3.90
  -2   3   1   24.70    4.50
  -2   3   1   23.30    3.30
  -2   3   1   23.30    4.20
  -2   3   1   19.10    3.30
   1  -3  -1 2913.41  199.08
   1  -3  -1 3210.58  201.08
   1  -3  -1 3126.29  199.58
   1  -3  -1 2946.51  200.48
   1  -3  -1 3193.28  199.68
   1  -3  -1 3073.29  199.38
   1  -3  -1 2899.71  199.38
   1  -3  -1 2862.01  198.78
   1  -3  -1 2986.00  199.98
   1  -3  -1 2959.40  201.18
  -1   3   1 3100.79  199.28
  -1   3   1 3227.88  199.88
  -1   3   1 3045.20  199.08
  -1   3   1 3109.89  200.58
  -1   3   1 3026.60  199.48
  -1   3   1 2929.11  199.78
  -1   3   1 3223.38  200.68
  -1   3   1 3229.08  199.78
  -1   3   1 2955.10  200.38
  -1   3   1 2979.50  200.88
  -1   3   1 3042.00  199.28
  -1   3   1 3103.49  200.28
   0  -3  -1  208.18   15.90
   0  -3  -1  229.28   15.80
   0  -3  -1  235.98   16.80
   0  -3  -1  229.28   15.70
   0  -3  -1  206.28   15.00
   0  -3  -1  220.58   15.60
   0  -3  -1  208.68   14.80
   0  -3  -1  220.68   16.70
   0  -3  -1  208.18   15.30
   0   3   1  197.48   15.50
   0   3   1  228.88   15.90
   0   3   1  222.48   15.30
   0   3   1  232.28   15.40
   0   3   1  235.08   16.20
   0   3   1  188.68   15.80
   0   3   1  214.08   16.30
   0   3   1  224.58   15.50
   0   3   1  225.28   16.70
   0   3   1  203.88   15.60
   0   3   1  223.68   16.60
   0   3   1  223.18   15.00
   0   3   1  223.78   15.20
   0   3   1  206.38   16.20
   0   3   1  236.78   15.70
  -1  -3  -1 2085.89  137.89
  -1  -3  -1 2075.49  136.99
  -1  -3  -1 2107.99  137.59
  -1  -3  -1 2223.08  136.69
  -1  -3  -1 2004.70  136.59
  -1  -3  -1 2026.70  137.09
  -1  -3  -1 2043.40  136.79
  -1  -3  -1 2052.99  136.29
  -1  -3  -1 2077.89  136.39
  -1  -3  -1 2101.39  136.49
  -1  -3  -1 1982.40  137.49
  -1  -3  -1 2232.28  136.99
  -1  -3  -1 2219.28  136.89
   1   3   1 2291.07  137.99
   1   3   1 2010.90  136.79
   1   3   1 2055.99  136.39
   1   3   1 2055.99  137.89
   1   3   1 2098.79  136.29
   1   3   1 2060.19  137.29
   1   3   1 2103.49  136.69
   1   3   1 1864.61  138.09
   1   3   1 2035.70  136.89
   1   3   1 2206.38  137.49
   1   3   1 2055.69  137.49
   1   3   1 2052.69  136.59
   1   3   1 2082.19  137.09
   1   3   1 2092.19  137.19
  -2  -3  -1  144.69   11.30
  -2  -3  -1  140.79   11.10
  -2  -3  -1  148.89   11.80
  -2  -3  -1  143.69   10.90
  -2  -3  -1  159.18   12.20
  -2  -3  -1  160.78   11.40
  -2  -3  -1  138.89   11.20
  -2  -3  -1  129.29   13.00
  -2  -3  -1  136.29   12.20
  -2  -3  -1  164.58   12.90
  -2  -3  -1  146.69   10.20
   2   3   1  147.29   11.10
   2   3   1  154.08   12.10
   2   3   1  146.79   11.20
   2   3   1  147.79   12.60
   2   3   1  137.79   13.40
   2   3   1  156.98   11.60
   2   3   1  145.79   11.50
   2   3   1  156.98   11.40
   2   3   1  154.28   11.40
   2   3   1  158.98   12.50
  -3  -3  -1 1676.83  110.49
  -3  -3  -1 1732.43  113.09
  -3  -3  -1 1589.24  112.29
  -3  -3  -1 1631.04  110.79
  -3  -3  -1 1726.23  110.99
  -3  -3  -1 1675.13  110.29
  -3  -3  -1 1494.75  113.39
  -3  -3  -1 1703.93  111.09
  -3  -3  -1 1639.74  111.59
   3   3   1 1650.43  110.99
   3   3   1 1685.43  111.89
   3   3   1 1813.12  112.79
   3   3   1 1591.24  110.99
   3   3   1 1714.13  110.39
   3   3   1 1765.62  112.09
   3   3   1 1788.32  113.29
   3   3   1 1695.13  111.19
   3   3   1 1492.95  113.29
   3   3   1 1720.73  110.59
  -4  -3  -1 3739.53  258.77
  -4  -3  -1 3880.31  256.97
  -4  -3  -1 3884.61  255.97
  -4  -3  -1 4001.60  256.07
  -4  -3  -1 3779.02  257.67
  -4  -3  -1 3646.44  256.77
  -4  -3  -1 3457.95  259.77
  -4  -3  -1 3930.71  259.67
   4   3   1 3966.20  258.07
   4   3   1 4108.49  255.87
   4   3   1 3891.21  257.07
   4   3   1 4196.58  257.27
   4   3   1 4096.29  258.17
   4   3   1 4074.99  256.37
   4   3   1 3679.23  259.57
   4   3   1 4217.68  259.07
  -5  -3  -1  479.05   40.10
  -5  -3  -1  459.95   39.30
  -5  -3  -1  459.45   40.40
  -5  -3  -1  522.95   38.40
  -5  -3  -1  536.15   37.70
  -5  -3  -1  562.34   36.40
   5   3   1  541.55   38.70
   5   3   1  538.85   36.80
   5   3   1  510.15   37.60
   5   3   1  537.55   40.20
   5   3   1  550.24   38.70
  -6  -3  -1  829.82   57.29
  -6  -3  -1  807.82   55.39
  -6  -3  -1  814.42   61.09
  -6  -3  -1  760.72   59.69
  -6  -3  -1  751.42   57.89
  -6  -3  -1  709.03   60.39
   6   3   1  816.82   59.49
   6   3   1  898.81   56.39
   6   3   1  768.02   57.99
   6   3   1  884.41   58.79
   6   3   1  879.81   57.09
   6   3   1  749.62   56.99
   6   3   1  860.21   58.19
  -7  -3  -1  594.24   41.80
  -7  -3  -1  548.75   42.40
  -7  -3  -1  522.25   45.30
  -7  -3  -1  442.96   43.30
  -7  -3  -1  472.65   44.70
   7   3   1  563.74   42.30
   7   3   1  542.05   43.00
   7   3   1  568.94   40.00
   7   3   1  645.14   41.30
   7   3   1  618.74   43.10
   7   3   1  554.94   41.70
  -8  -3  -1    6.00    6.70
  -8  -3  -1   -1.00    5.30
  -8  -3  -1    0.70    5.30
  -8  -3  -1   -0.30    1.10
  -8  -3  -1   -0.40    2.70
  -8  -3  -1    2.10    3.60
   8   3   1   -0.30    2.30
   8   3   1    2.40    3.80
   8   3   1   -0.40    3.20
   8   3   1   -0.60    4.00
   8   3   1    1.20    3.70
   8   3   1    3.20    3.40
   8   3   1    3.50    3.80
  -9  -3  -1  247.08   36.00
  -9  -3  -1  327.17   36.50
  -9  -3  -1  366.66   33.10
  -9  -3  -1  392.76   32.60
  -9  -3  -1  381.16   37.70
   9   3   1  418.36   30.70
   9   3   1  387.96   32.20
   9   3   1  455.05   33.90
   9   3   1  406.76   30.40
   9   3   1  434.66   34.10
 -10  -3  -1   30.50    8.70
 -10  -3  -1   34.70   12.20
 -10  -3  -1   24.90   10.80
 -10  -3  -1   21.00   11.10
 -10  -3  -1   27.00    8.30
  10   3   1   30.70    9.10
  10   3   1   34.00    7.50
  10   3   1   50.39   10.00
  10   3   1   39.50    7.40
  10   3   1   28.80    8.00
 -11  -3  -1   98.79   22.10
 -11  -3  -1  172.18   22.70
 -11  -3  -1  153.58   22.10
 -11  -3  -1  171.08   28.90
  11   3   1  174.68   22.70
  11   3   1  194.88   16.10
  11   3   1  174.98   17.80
 -12  -3  -1   29.90   14.80
 -12  -3  -1   53.59   15.60
 -12  -3  -1   27.60   13.40
  12   3   1   56.09   12.60
  12   3   1   49.40    9.00
  12   3   1   57.69    7.60
 -13  -3  -1   10.40   12.30
 -13  -3  -1   11.10    6.90
 -13  -3  -1   -1.40    9.10
  13   3   1    9.60    7.50
 -14  -3  -1   86.99   24.50
 -14  -3  -1   81.39   24.60
 -14  -3  -1  162.28   20.90
  14   3   1  139.29   19.70
 -15  -3  -1   -6.80   10.90
 -15  -3  -1    7.40   11.80
  15   3   1   -4.50    5.30
 -13   4   1    7.40   15.50
 -13   4   1    4.90   13.20
  12  -4  -1   52.59   16.80
 -12   4   1    5.20   12.70
 -12   4   1   40.30   20.10
  11  -4  -1   14.10    9.50
 -11   4   1    5.00   12.40
 -11   4   1   -7.00    7.50
 -11   4   1   16.00    8.60
  10  -4  -1   95.69   12.50
  10  -4  -1  116.59   20.30
 -10   4   1   78.69   17.20
 -10   4   1   72.69   20.30
 -10   4   1   76.09   21.80
 -10   4   1  118.99   17.60
   9  -4  -1  142.39   22.30
   9  -4  -1  187.68   15.60
  -9   4   1  107.69   22.40
  -9   4   1  145.69   22.70
  -9   4   1  179.88   24.40
  -9   4   1  166.18   20.80
  -9   4   1  139.89   15.70
  -9   4   1  125.19   25.80
   8  -4  -1   20.80    5.00
   8  -4  -1   22.10    9.10
  -8   4   1   10.90    4.10
  -8   4   1    2.00    4.90
  -8   4   1    2.40    8.20
  -8   4   1    8.80    5.30
  -8   4   1    3.30    7.60
  -8   4   1    9.00    6.20
   7  -4  -1   87.49    8.20
   7  -4  -1   79.29    7.80
   7  -4  -1   82.19    9.90
   7  -4  -1   84.99   14.70
  -7   4   1   81.99   12.90
  -7   4   1   76.09   13.30
  -7   4   1   74.49   16.90
  -7   4   1   59.69   14.50
  -7   4   1   78.19    9.80
  -7   4   1   80.79   14.10
  -7   4   1   65.09   12.10
  -7   4   1   77.99   13.50
   6  -4  -1   30.30    5.20
   6  -4  -1   45.20    6.50
   6  -4  -1   30.00    5.20
   6  -4  -1   18.30    7.10
   6  -4  -1   30.00    5.20
  -6   4   1   21.00    8.80
  -6   4   1   30.00    7.30
  -6   4   1   33.20    7.60
  -6   4   1   29.70   10.40
  -6   4   1   27.00    7.70
  -6   4   1   28.80    5.40
  -6   4   1   60.89   10.70
  -6   4   1   27.60    5.60
  -6   4   1   20.70    6.70
   5  -4  -1  751.42   49.20
   5  -4  -1  712.23   48.30
   5  -4  -1  805.52   50.29
   5  -4  -1  698.33   49.00
   5  -4  -1  718.73   53.69
   5  -4  -1  767.12   51.39
   5  -4  -1  692.13   49.10
  -5   4   1  703.23   48.90
  -5   4   1  668.53   51.79
  -5   4   1  745.63   52.09
  -5   4   1  718.43   51.89
  -5   4   1  732.43   51.79
  -5   4   1  536.05   52.69
  -5   4   1  718.63   49.50
  -5   4   1  749.62   53.29
  -5   4   1  578.04   54.49
   4  -4  -1  719.63   51.09
   4  -4  -1  751.52   51.89
   4  -4  -1  729.03   51.59
   4  -4  -1  826.12   52.89
   4  -4  -1  749.42   51.49
   4  -4  -1  845.62   52.69
   4  -4  -1  737.43   50.89
   4  -4  -1  749.33   55.49
  -4   4   1  770.22   54.49
  -4   4   1  744.43   54.69
  -4   4   1  580.94   55.69
  -4   4   1  746.83   54.09
  -4   4   1  782.92   53.59
  -4   4   1  798.12   53.99
  -4   4   1  747.63   51.29
  -4   4   1  769.52   51.99
   3  -4  -1  126.09   11.20
   3  -4  -1  117.19   14.20
   3  -4  -1  126.59   10.50
   3  -4  -1  122.69   10.00
   3  -4  -1  121.99   10.60
   3  -4  -1  119.29   10.10
   3  -4  -1  125.09    9.80
   3  -4  -1  107.79   12.70
   3  -4  -1  120.79    9.50
  -3   4   1  125.09    9.90
  -3   4   1  139.09   10.60
  -3   4   1  133.39   12.20
  -3   4   1  127.89   13.80
  -3   4   1  123.49   12.30
  -3   4   1  112.49   10.90
  -3   4   1   94.19   13.60
  -3   4   1  119.39   11.50
   2  -4  -1 1492.75   99.29
   2  -4  -1 1421.76   98.09
   2  -4  -1 1372.16  101.39
   2  -4  -1 1516.65  100.19
   2  -4  -1 1493.15  101.19
   2  -4  -1 1461.05  100.69
   2  -4  -1 1492.45   99.09
   2  -4  -1 1464.75   98.89
   2  -4  -1 1426.26   98.49
   2  -4  -1 1582.94   99.59
  -2   4   1 1523.85   98.59
  -2   4   1 1477.85  100.49
  -2   4   1 1459.55  100.99
  -2   4   1 1511.45   99.89
  -2   4   1 1630.84  107.29
  -2   4   1 1520.35   99.19
  -2   4   1 1589.64  100.29
  -2   4   1 1540.95  100.29
  -2   4   1 1438.66  100.89
   1  -4  -1  725.33   48.60
   1  -4  -1  813.72   51.59
   1  -4  -1  768.12   49.90
   1  -4  -1  743.63   49.50
   1  -4  -1  810.42   50.09
   1  -4  -1  728.13   49.50
   1  -4  -1  697.53   50.49
   1  -4  -1  730.33   49.00
   1  -4  -1  744.93   51.59
  -1   4   1  735.93   49.50
  -1   4   1  747.33   49.30
  -1   4   1  700.13   51.19
  -1   4   1  710.93   49.99
  -1   4   1  744.83   49.00
  -1   4   1  703.63   50.99
  -1   4   1  696.63   51.09
  -1   4   1  783.02   50.39
  -1   4   1  730.33   50.29
  -1   4   1  721.13   50.39
  -1   4   1  622.84   51.19
   0  -4  -1 1150.38   72.59
   0  -4  -1 1050.19   71.09
   0  -4  -1 1082.49   70.89
   0  -4  -1 1112.29   71.49
   0  -4  -1 1001.20   72.29
   0  -4  -1 1059.99   73.49
   0  -4  -1 1036.70   72.09
   0  -4  -1 1052.39   71.39
   0  -4  -1 1118.19   73.69
   0  -4  -1 1081.99   71.09
   0  -4  -1 1139.79   72.69
   0  -4  -1 1094.09   71.99
   0   4   1 1060.89   73.39
   0   4   1 1065.99   71.39
   0   4   1 1039.00   73.39
   0   4   1 1023.40   72.19
   0   4   1 1064.19   71.79
   0   4   1  978.70   72.49
   0   4   1 1140.39   71.89
   0   4   1 1060.49   72.39
   0   4   1 1167.68   73.49
   0   4   1 1139.19   72.19
   0   4   1 1079.09   73.49
   0   4   1  977.80   72.39
   0   4   1 1141.99   73.19
   0   4   1 1173.68   72.69
  -1  -4  -1 5245.88  321.77
  -1  -4  -1 4738.63  320.77
  -1  -4  -1 4639.94  321.87
  -1  -4  -1 4940.41  321.67
  -1  -4  -1 4743.53  320.77
  -1  -4  -1 4844.32  322.27
  -1  -4  -1 4897.21  321.27
  -1  -4  -1 4629.04  321.27
  -1  -4  -1 5107.59  320.67
  -1  -4  -1 4731.83  321.17
  -1  -4  -1 5066.19  322.37
  -1  -4  -1 5237.78  321.37
  -1  -4  -1 4856.41  322.67
  -1  -4  -1 5644.33  322.07
   1   4   1 5189.18  321.37
   1   4   1 4632.34  321.07
   1   4   1 4845.92  321.67
   1   4   1 4871.11  322.27
   1   4   1 4736.73  321.77
   1   4   1 5003.80  321.57
   1   4   1 4712.53  320.77
   1   4   1 4699.43  322.67
   1   4   1 4385.66  323.07
   1   4   1 5014.90  320.67
   1   4   1 4952.00  321.87
   1   4   1 4918.41  321.07
   1   4   1 5385.86  322.37
   1   4   1 5038.00  321.37
   1   4   1 4946.41  321.77
  -2  -4  -1 1059.99   81.59
  -2  -4  -1 1157.68   80.59
  -2  -4  -1 1194.08   80.19
  -2  -4  -1 1210.78   81.19
  -2  -4  -1 1224.98   79.79
  -2  -4  -1 1210.28   79.39
  -2  -4  -1 1207.38   78.29
  -2  -4  -1 1142.49   79.49
  -2  -4  -1 1249.57   80.39
  -2  -4  -1 1157.48   79.99
  -2  -4  -1 1246.28   79.79
  -2  -4  -1 1190.98   79.19
  -2  -4  -1 1199.58   78.99
   2   4   1 1180.88   79.99
   2   4   1  994.10   81.79
   2   4   1 1216.98   79.79
   2   4   1 1238.78   79.49
   2   4   1 1203.28   78.29
   2   4   1 1220.88   80.49
   2   4   1 1245.38   80.99
   2   4   1 1241.98   79.79
   2   4   1 1267.37   79.99
   2   4   1 1186.98   79.59
  -3  -4  -1 2209.58  144.19
  -3  -4  -1 2146.99  142.09
  -3  -4  -1 2180.08  141.89
  -3  -4  -1 1946.71  144.99
  -3  -4  -1 2126.59  143.59
  -3  -4  -1 2236.38  142.19
  -3  -4  -1 2138.99  142.79
  -3  -4  -1 2200.28  140.19
  -3  -4  -1 2107.09  141.39
   3   4   1 2211.18  142.39
   3   4   1 2415.26  144.19
   3   4   1 2201.28  143.19
   3   4   1 2061.79  141.99
   3   4   1 2142.29  142.09
   3   4   1 1889.21  144.89
   3   4   1 2185.18  141.69
   3   4   1 2153.18  141.69
   3   4   1 2086.19  141.79
  -4  -4  -1  550.64   39.20
  -4  -4  -1  509.55   42.60
  -4  -4  -1  529.25   38.20
  -4  -4  -1  533.85   41.50
  -4  -4  -1  566.94   40.10
  -4  -4  -1  520.05   38.90
  -4  -4  -1  574.64   38.70
  -4  -4  -1  549.15   41.10
   4   4   1  576.44   38.30
   4   4   1  588.94   38.80
   4   4   1  610.44   41.30
   4   4   1  571.24   39.40
   4   4   1  542.15   40.10
   4   4   1  524.05   42.40
   4   4   1  565.84   40.30
   4   4   1  565.24   39.30
  -5  -4  -1  859.61   62.69
  -5  -4  -1  981.20   65.39
  -5  -4  -1  871.21   68.09
  -5  -4  -1  973.40   63.19
  -5  -4  -1  941.81   67.29
  -5  -4  -1  872.11   63.89
  -5  -4  -1  818.12   65.89
   5   4   1 1034.50   64.59
   5   4   1  996.00   65.69
   5   4   1  890.91   64.99
   5   4   1  982.30   63.49
   5   4   1  921.51   67.59
   5   4   1  935.71   64.29
  -6  -4  -1 2523.45  169.68
  -6  -4  -1 2488.55  173.48
  -6  -4  -1 2299.57  171.98
  -6  -4  -1 2146.89  173.38
  -6  -4  -1 2502.15  168.08
  -6  -4  -1 2597.74  170.98
  -6  -4  -1 2535.35  167.98
   6   4   1 2649.73  170.88
   6   4   1 2472.85  169.78
   6   4   1 2722.13  168.88
   6   4   1 2699.23  173.58
   6   4   1 2840.72  171.68
  -7  -4  -1   51.29    7.90
  -7  -4  -1   52.39    7.30
  -7  -4  -1   52.89    9.20
  -7  -4  -1   64.69   13.60
  -7  -4  -1   54.69   11.70
  -7  -4  -1   58.19   12.50
  -7  -4  -1   60.79   10.20
   7   4   1   65.59    9.50
   7   4   1   59.19    8.30
   7   4   1   64.49   10.20
   7   4   1   47.90    9.30
   7   4   1   58.79    9.40
   7   4   1   63.49   10.30
   7   4   1   60.39   11.10
  -8  -4  -1  534.15   50.19
  -8  -4  -1  658.13   47.80
  -8  -4  -1  602.24   52.99
  -8  -4  -1  655.93   49.20
  -8  -4  -1  582.44   51.99
  -8  -4  -1  648.84   45.20
   8   4   1  646.14   48.60
   8   4   1  687.83   50.29
   8   4   1  665.63   46.80
   8   4   1  652.73   46.20
  -9  -4  -1   19.20    9.50
  -9  -4  -1   22.30    7.20
  -9  -4  -1   36.50    8.50
  -9  -4  -1   18.60    9.50
  -9  -4  -1   12.10    8.90
  -9  -4  -1   23.40    5.20
   9   4   1   32.00    6.90
   9   4   1   27.60    8.00
   9   4   1   14.40    6.60
   9   4   1   15.30    7.00
   9   4   1   10.70    4.50
 -10  -4  -1  128.69   24.00
 -10  -4  -1  150.18   26.30
 -10  -4  -1  198.68   29.90
 -10  -4  -1  183.98   23.30
 -10  -4  -1  169.98   21.40
 -10  -4  -1  173.48   16.20
  10   4   1  173.48   18.90
  10   4   1  193.18   19.80
  10   4   1  179.48   19.00
  10   4   1  202.78   23.80
  10   4   1  225.98   21.40
 -11  -4  -1  416.96   33.30
 -11  -4  -1  285.07   38.00
 -11  -4  -1  280.07   40.20
 -11  -4  -1  400.76   34.30
  11   4   1  339.27   32.10
  11   4   1  348.77   30.20
  11   4   1  328.07   27.60
 -12  -4  -1    4.30    7.40
 -12  -4  -1    2.00   10.00
 -12  -4  -1   -1.90    7.70
  12   4   1    2.80    6.10
  12   4   1    3.80    4.90
  12   4   1   -2.70    2.90
 -13  -4  -1  150.98   29.20
 -13  -4  -1  172.58   32.60
  13   4   1  252.37   28.00
 -14  -4  -1   55.59   12.30
 -14  -4  -1   30.70   16.30
 -14  -4  -1   12.70   13.60
  14   4   1   50.89   12.70
 -15  -4  -1   27.30   17.60
 -15  -4  -1   20.30   15.40
  15   4   1   25.40    9.70
 -12   5   1    4.70   14.30
 -12   5   1   10.10   12.40
  11  -5  -1   33.40   13.40
 -11   5   1   30.50   15.50
 -11   5   1   34.80   11.70
 -11   5   1   26.40   16.20
  10  -5  -1  185.78   27.70
 -10   5   1  174.48   22.90
 -10   5   1  185.28   27.70
 -10   5   1  143.69   29.80
 -10   5   1  127.19   26.10
   9  -5  -1  138.89   21.50
   9  -5  -1  120.89   13.70
  -9   5   1   63.19   19.80
  -9   5   1   72.59   18.60
  -9   5   1  122.59   17.90
  -9   5   1   96.19   18.70
   8  -5  -1    5.50    3.60
   8  -5  -1    6.20    5.90
  -8   5   1    6.90    8.40
  -8   5   1   13.90    7.80
  -8   5   1    8.10    6.40
  -8   5   1   14.30    6.30
  -8   5   1    4.30    5.90
  -8   5   1    7.70    3.90
  -8   5   1    7.30    8.80
   7  -5  -1   84.29   15.90
   7  -5  -1   94.29   11.30
  -7   5   1   77.49   17.00
  -7   5   1  109.09   15.60
  -7   5   1  119.79   12.30
  -7   5   1  144.09   17.30
  -7   5   1  108.79   16.10
  -7   5   1  120.89   17.30
  -7   5   1   62.49   17.50
  -7   5   1  114.39   17.50
  -7   5   1  101.19   12.10
   6  -5  -1  161.78   13.30
   6  -5  -1  146.09   11.90
   6  -5  -1  161.98   12.50
   6  -5  -1  150.18   19.80
  -6   5   1  159.28   13.30
  -6   5   1  113.19   20.60
  -6   5   1  134.49   18.50
  -6   5   1  110.59   13.50
  -6   5   1  179.08   19.30
  -6   5   1   93.29   18.30
  -6   5   1  140.09   17.30
  -6   5   1  127.99   18.00
  -6   5   1  158.08   18.70
   5  -5  -1  352.76   25.70
   5  -5  -1  341.27   30.50
   5  -5  -1  349.37   26.00
   5  -5  -1  335.47   25.80
   5  -5  -1  398.56   26.70
  -5   5   1  291.37   32.10
  -5   5   1  254.87   30.00
  -5   5   1  368.36   29.70
  -5   5   1  379.46   30.70
  -5   5   1  356.86   29.30
  -5   5   1  385.96   29.10
  -5   5   1  339.07   26.40
  -5   5   1  371.66   29.10
  -5   5   1  352.66   25.90
   4  -5  -1    8.10    4.80
   4  -5  -1    3.00    2.00
   4  -5  -1    8.30    2.70
   4  -5  -1    8.20    2.30
   4  -5  -1    5.00    2.20
   4  -5  -1    7.00    3.10
   4  -5  -1    7.60    2.80
  -4   5   1    7.00    5.30
  -4   5   1    3.50    3.70
  -4   5   1    7.90    2.70
  -4   5   1   13.10    3.60
  -4   5   1    4.50    3.70
  -4   5   1    8.70    4.40
  -4   5   1    7.20    4.10
  -4   5   1   -0.40    4.80
  -4   5   1    4.10    2.90
   3  -5  -1 1264.17   75.89
   3  -5  -1 1106.79   77.09
   3  -5  -1 1053.09   78.29
   3  -5  -1 1105.49   74.29
   3  -5  -1 1108.29   74.89
   3  -5  -1 1129.39   74.89
   3  -5  -1 1127.99   75.09
   3  -5  -1 1160.08   76.19
   3  -5  -1 1096.09   73.79
  -3   5   1  856.11   78.39
  -3   5   1 1102.39   77.59
  -3   5   1 1116.39   78.09
  -3   5   1 1088.59   76.99
  -3   5   1 1081.49   75.09
  -3   5   1 1115.09   74.39
  -3   5   1 1137.29   77.09
  -3   5   1 1170.18   76.49
   2  -5  -1  670.23   49.10
   2  -5  -1  689.23   46.40
   2  -5  -1  718.53   46.80
   2  -5  -1  704.83   48.30
   2  -5  -1  710.43   46.40
   2  -5  -1  768.52   47.20
   2  -5  -1  606.34   47.30
   2  -5  -1  661.93   45.20
   2  -5  -1  689.63   45.80
  -2   5   1  692.83   48.10
  -2   5   1  669.53   47.30
  -2   5   1  622.24   48.70
  -2   5   1  615.14   49.60
  -2   5   1  693.53   47.90
  -2   5   1  703.53   46.60
  -2   5   1  681.63   49.00
  -2   5   1  531.55   48.20
  -2   5   1  709.23   48.90
  -2   5   1  683.43   45.90
  -2   5   1  672.93   45.80
   1  -5  -1   84.29    6.00
   1  -5  -1   79.69    6.80
   1  -5  -1   80.99   10.30
   1  -5  -1   72.89    7.10
   1  -5  -1   67.39    7.70
   1  -5  -1   73.89    9.80
   1  -5  -1   88.79    7.90
   1  -5  -1   89.19    7.90
   1  -5  -1   70.39    6.20
   1  -5  -1   78.49    9.20
  -1   5   1   87.79    9.20
  -1   5   1   79.49    6.80
  -1   5   1   62.49    9.20
  -1   5   1   83.59   10.70
  -1   5   1   73.89    6.90
  -1   5   1   73.59    9.80
  -1   5   1   89.09    8.40
  -1   5   1   80.39    9.70
  -1   5   1   72.29    7.60
  -1   5   1   70.99    7.70
  -1   5   1   56.19    8.90
   0  -5  -1  589.54   37.20
   0  -5  -1  403.56   36.60
   0  -5  -1  504.75   34.80
   0  -5  -1  478.95   36.30
   0  -5  -1  537.05   35.00
   0  -5  -1  485.85   35.30
   0  -5  -1  512.45   36.30
   0  -5  -1  517.55   35.20
   0  -5  -1  514.75   35.20
   0  -5  -1  490.65   37.60
   0  -5  -1  557.54   34.90
   0  -5  -1  533.95   38.00
   0  -5  -1  541.75   36.20
   0  -5  -1  530.75   36.70
   0  -5  -1  530.75   35.70
   0   5   1  519.85   35.40
   0   5   1  514.35   37.70
   0   5   1  550.54   36.20
   0   5   1  530.05   37.20
   0   5   1  482.05   36.10
   0   5   1  492.75   36.50
   0   5   1  605.24   39.50
   0   5   1  524.15   36.90
   0   5   1  504.45   38.10
   0   5   1  574.04   37.20
   0   5   1  522.25   35.90
   0   5   1  470.95   36.80
  -1  -5  -1    9.80    3.30
  -1  -5  -1   10.40    2.10
  -1  -5  -1    4.50    1.80
  -1  -5  -1   15.20    3.60
  -1  -5  -1    3.90    2.50
  -1  -5  -1    9.90    2.00
  -1  -5  -1    3.80    2.60
  -1  -5  -1   15.00    3.50
  -1  -5  -1   12.10    2.90
  -1  -5  -1   10.60    3.20
  -1  -5  -1   12.30    3.50
  -1  -5  -1    8.40    2.70
  -1  -5  -1   11.50    2.70
  -1  -5  -1    8.00    2.70
  -1  -5  -1   12.60    2.80
   1   5   1   10.70    2.60
   1   5   1    7.90    2.60
   1   5   1   12.70    3.40
   1   5   1   12.50    2.90
   1   5   1   -0.10    2.40
   1   5   1    5.90    3.20
   1   5   1    6.20    2.60
   1   5   1    6.60    2.30
   1   5   1    4.50    2.60
   1   5   1    7.50    2.60
   1   5   1   10.80    2.60
   1   5   1   10.00    3.10
   1   5   1    6.50    1.80
  -2  -5  -1  924.01   66.89
  -2  -5  -1  901.51   64.99
  -2  -5  -1  911.51   64.99
  -2  -5  -1  967.60   66.09
  -2  -5  -1  932.01   64.19
  -2  -5  -1  940.71   64.69
  -2  -5  -1  978.30   63.99
  -2  -5  -1  970.50   63.69
  -2  -5  -1 1054.79   65.29
  -2  -5  -1  892.41   63.99
  -2  -5  -1 1011.10   64.79
  -2  -5  -1  988.10   65.59
  -2  -5  -1 1006.90   64.29
   2   5   1  997.80   65.99
   2   5   1  964.40   65.09
   2   5   1  914.21   64.59
   2   5   1  967.50   62.99
   2   5   1  959.70   66.29
   2   5   1  901.01   64.59
   2   5   1  947.11   64.59
   2   5   1  962.60   64.39
   2   5   1  961.00   65.49
   2   5   1  982.20   65.49
   2   5   1  971.60   64.39
   2   5   1  837.72   67.19
  -3  -5  -1  137.69   12.60
  -3  -5  -1  145.69   12.10
  -3  -5  -1  147.09   11.80
  -3  -5  -1  163.78   12.40
  -3  -5  -1  141.29   13.80
  -3  -5  -1  134.59   16.40
  -3  -5  -1  125.39   13.10
  -3  -5  -1  134.29   12.00
  -3  -5  -1  149.49   10.00
  -3  -5  -1  137.49   11.50
   3   5   1  136.49   12.80
   3   5   1  147.59   12.10
   3   5   1  138.49   12.10
   3   5   1  151.78   12.40
   3   5   1  159.78   12.30
   3   5   1  147.29   13.10
   3   5   1  156.78   12.10
   3   5   1  149.39   13.60
   3   5   1  141.19   11.90
   3   5   1  129.19   16.40
  -4  -5  -1  155.58   19.70
  -4  -5  -1  178.78   14.50
  -4  -5  -1  185.08   15.00
  -4  -5  -1  190.38   15.40
  -4  -5  -1  212.48   18.10
  -4  -5  -1  207.58   16.30
  -4  -5  -1  184.78   16.10
  -4  -5  -1  168.58   16.80
   4   5   1  166.38   15.10
   4   5   1  198.78   14.80
   4   5   1  194.88   15.50
   4   5   1  181.78   16.30
   4   5   1  188.18   16.30
   4   5   1  164.88   20.20
   4   5   1  221.28   15.50
   4   5   1  174.08   14.60
   4   5   1  208.58   15.80
  -5  -5  -1  573.54   46.90
  -5  -5  -1  653.63   43.90
  -5  -5  -1  643.44   44.30
  -5  -5  -1  628.74   46.00
  -5  -5  -1  654.53   48.30
  -5  -5  -1  525.05   48.60
  -5  -5  -1  651.03   45.10
   5   5   1  616.14   46.10
   5   5   1  666.03   45.30
   5   5   1  625.54   45.00
   5   5   1  607.14   49.00
   5   5   1  684.23   43.90
   5   5   1  651.33   44.50
  -6  -5  -1   15.50    6.30
  -6  -5  -1   11.10    5.80
  -6  -5  -1   16.20    3.80
  -6  -5  -1    9.30    3.30
  -6  -5  -1   11.00    4.00
  -6  -5  -1    5.40    5.70
  -6  -5  -1    7.40    3.80
   6   5   1   14.30    6.20
   6   5   1   14.10    4.40
   6   5   1    8.70    3.80
   6   5   1   12.60    3.90
   6   5   1   14.10    5.00
  -7  -5  -1  297.67   26.40
  -7  -5  -1  327.27   24.20
  -7  -5  -1  315.07   23.80
  -7  -5  -1  309.27   25.50
  -7  -5  -1  261.67   27.60
  -7  -5  -1  312.17   30.90
  -7  -5  -1  291.77   28.90
   7   5   1  290.87   25.40
   7   5   1  345.77   29.70
   7   5   1  340.17   25.00
   7   5   1  338.17   26.80
  -8  -5  -1    6.60    4.50
  -8  -5  -1    9.20    6.80
  -8  -5  -1    8.20    7.90
  -8  -5  -1   21.20    4.90
  -8  -5  -1   11.40    7.70
  -8  -5  -1   12.50    5.50
   8   5   1   17.60    6.60
   8   5   1   16.80    5.10
   8   5   1   15.90    5.50
   8   5   1   18.80    7.60
   8   5   1   16.00    5.00
  -9  -5  -1  150.08   24.30
  -9  -5  -1  148.59   23.50
  -9  -5  -1  133.99   24.10
  -9  -5  -1  171.08   21.50
  -9  -5  -1  182.68   15.90
  -9  -5  -1  178.48   20.30
   9   5   1  198.68   19.70
   9   5   1  188.48   19.30
   9   5   1  184.28   18.90
   9   5   1  206.38   24.00
   9   5   1  163.98   20.60
 -10  -5  -1  375.76   31.60
 -10  -5  -1  361.76   28.00
 -10  -5  -1  258.07   37.90
 -10  -5  -1  346.27   32.20
 -10  -5  -1  277.57   37.20
 -10  -5  -1  310.57   40.70
  10   5   1  397.36   29.60
  10   5   1  390.66   33.30
  10   5   1  377.96   31.80
  10   5   1  348.97   29.30
  10   5   1  381.46   33.00
 -11  -5  -1   15.10    7.10
 -11  -5  -1   10.50    6.60
 -11  -5  -1   11.20    9.20
 -11  -5  -1   12.90    9.60
  11   5   1    6.70    4.40
  11   5   1   14.40    7.40
  11   5   1   14.10    6.90
 -12  -5  -1  235.48   38.60
 -12  -5  -1  292.37   43.30
 -12  -5  -1  380.06   34.80
  12   5   1  401.96   32.60
  12   5   1  421.26   35.90
  12   5   1  394.66   29.80
 -13  -5  -1   95.59   23.50
 -13  -5  -1  103.79   25.50
  13   5   1  202.08   24.80
 -14  -5  -1   75.09   21.70
 -14  -5  -1   86.19   23.80
  14   5   1   80.49   16.30
 -15  -5  -1   63.49   21.70
 -15  -5  -1  132.09   23.20
 -15  -5  -1   90.29   27.20
  15   5   1  110.89   18.60
[truncated: 2,814,116 more chars]
