# Supplementary material
Source: MDPI journal article supplement (https://www.mdpi.com/2073-4352/11/2/179)
Supplement: s1 [file s1 › 3_rf1933.cif]

 
data_rf1933
 
_audit_creation_method            'SHELXL-2016/6'
_shelx_SHELXL_version_number      '2016/6'
_chemical_name_systematic         ?
_chemical_name_common             '[PrL3(4,4'-dimethoxy-bipy]'
_chemical_melting_point           ?
_chemical_formula_moiety          'C54 H36 F9 N2 O8 Pr'
_chemical_formula_sum
 'C54 H36 F9 N2 O8 Pr' 
_chemical_formula_weight          1152.76

loop_
 _atom_type_symbol
 _atom_type_description
 _atom_type_scat_dispersion_real
 _atom_type_scat_dispersion_imag
 _atom_type_scat_source
 'C'  'C'   0.0033   0.0016
 'International Tables Vol C Tables 4.2.6.8 and 6.1.1.4'
 'H'  'H'   0.0000   0.0000
 'International Tables Vol C Tables 4.2.6.8 and 6.1.1.4'
 'N'  'N'   0.0061   0.0033
 'International Tables Vol C Tables 4.2.6.8 and 6.1.1.4'
 'O'  'O'   0.0106   0.0060
 'International Tables Vol C Tables 4.2.6.8 and 6.1.1.4'
 'F'  'F'   0.0171   0.0103
 'International Tables Vol C Tables 4.2.6.8 and 6.1.1.4'
 'Pr'  'Pr'  -0.2180   2.8214
 'International Tables Vol C Tables 4.2.6.8 and 6.1.1.4'
 
_space_group_crystal_system       monoclinic
_space_group_IT_number            14
_space_group_name_H-M_alt         'P 21/c'
_space_group_name_Hall            '-P 2ybc'
 
_shelx_space_group_comment
;
The symmetry employed for this shelxl refinement is uniquely defined
by the following loop, which should always be used as a source of
symmetry information in preference to the above space-group names.
They are only intended as comments.
;
 
loop_
 _space_group_symop_operation_xyz
 'x, y, z'
 '-x, y+1/2, -z+1/2'
 '-x, -y, -z'
 'x, -y-1/2, z-1/2'
 
_cell_length_a                    13.2021(5)
_cell_length_b                    14.6509(6)
_cell_length_c                    24.8108(10)
_cell_angle_alpha                 90
_cell_angle_beta                  98.938(2)
_cell_angle_gamma                 90
_cell_volume                      4740.7(3)
_cell_formula_units_Z             4
_cell_measurement_temperature     100(2)
_cell_measurement_reflns_used     9736
_cell_measurement_theta_min       1.60
_cell_measurement_theta_max       30.50
 
_exptl_crystal_description        prism
_exptl_crystal_colour             green
_exptl_crystal_density_meas       ?
_exptl_crystal_density_method     ?
_exptl_crystal_density_diffrn     1.615          
_exptl_crystal_F_000              2312
_exptl_transmission_factor_min    ?
_exptl_transmission_factor_max    ?
_exptl_crystal_size_max           0.220
_exptl_crystal_size_mid           0.180
_exptl_crystal_size_min           0.110
_exptl_absorpt_coefficient_mu     1.123
_shelx_estimated_absorpt_T_min    0.790
_shelx_estimated_absorpt_T_max    0.886
_exptl_absorpt_correction_type    multi-scan
_exptl_absorpt_correction_T_min   0.7542
_exptl_absorpt_correction_T_max   0.9105
_exptl_absorpt_process_details    'SADABS'
_exptl_absorpt_special_details    ?
_diffrn_ambient_temperature       100(2)
_diffrn_radiation_wavelength      0.71073
_diffrn_radiation_type            MoK\a
_diffrn_source                    ?
_diffrn_measurement_device_type   'Bruker APEX-II CCD'
_diffrn_measurement_method        '\w-scans'
_diffrn_detector_area_resol_mean  ?
_diffrn_reflns_number             405492
_diffrn_reflns_av_unetI/netI      0.0136
_diffrn_reflns_av_R_equivalents   0.0514
_diffrn_reflns_limit_h_min        -18
_diffrn_reflns_limit_h_max        18
_diffrn_reflns_limit_k_min        -20
_diffrn_reflns_limit_k_max        20
_diffrn_reflns_limit_l_min        -35
_diffrn_reflns_limit_l_max        35
_diffrn_reflns_theta_min          1.561
_diffrn_reflns_theta_max          30.641
_diffrn_reflns_theta_full         26.000
_diffrn_measured_fraction_theta_max   0.996
_diffrn_measured_fraction_theta_full  1.000
_diffrn_reflns_Laue_measured_fraction_max    0.996
_diffrn_reflns_Laue_measured_fraction_full   1.000
_diffrn_reflns_point_group_measured_fraction_max   0.996
_diffrn_reflns_point_group_measured_fraction_full  1.000
_reflns_number_total              14586
_reflns_number_gt                 13656
_reflns_threshold_expression      'I > 2\s(I)'
_reflns_Friedel_coverage          0.000
_reflns_Friedel_fraction_max      .
_reflns_Friedel_fraction_full     .
 
_reflns_special_details
;
 Reflections were merged by SHELXL according to the crystal
 class for the calculation of statistics and refinement.
 
 _reflns_Friedel_fraction is defined as the number of unique
 Friedel pairs measured divided by the number that would be
 possible theoretically, ignoring centric projections and
 systematic absences.
;
 
_computing_data_collection        'Bruker APEX2'
_computing_cell_refinement        'Bruker SAINT'
_computing_data_reduction         'Bruker SAINT'
_computing_structure_solution     ?
_computing_structure_refinement 'SHELXL-2016/6 (Sheldrick, 2016)'
_computing_molecular_graphics     'Bruker SHELXTL'
_computing_publication_material   'Bruker SHELXTL'
_refine_special_details           ?
_refine_ls_structure_factor_coef  Fsqd
_refine_ls_matrix_type            full
_refine_ls_weighting_scheme       calc
_refine_ls_weighting_details
'w=1/[\s^2^(Fo^2^)+(0.0179P)^2^+6.4055P] where P=(Fo^2^+2Fc^2^)/3'
_atom_sites_solution_primary      ?
_atom_sites_solution_secondary    ?
_atom_sites_solution_hydrogens    geom
_refine_ls_hydrogen_treatment     constr
_refine_ls_extinction_method      none
_refine_ls_extinction_coef        .
_refine_ls_number_reflns          14586
_refine_ls_number_parameters      669
_refine_ls_number_restraints      0
_refine_ls_R_factor_all           0.0290
_refine_ls_R_factor_gt            0.0260
_refine_ls_wR_factor_ref          0.0622
_refine_ls_wR_factor_gt           0.0602
_refine_ls_goodness_of_fit_ref    1.146
_refine_ls_restrained_S_all       1.146
_refine_ls_shift/su_max           0.005
_refine_ls_shift/su_mean          0.000
 
loop_
 _atom_site_label
 _atom_site_type_symbol
 _atom_site_fract_x
 _atom_site_fract_y
 _atom_site_fract_z
 _atom_site_U_iso_or_equiv
 _atom_site_adp_type
 _atom_site_occupancy
 _atom_site_site_symmetry_order  
 _atom_site_calc_flag
 _atom_site_refinement_flags_posn
 _atom_site_refinement_flags_adp
 _atom_site_refinement_flags_occupancy
 _atom_site_disorder_assembly
 _atom_site_disorder_group
Pr1 Pr 0.28989(2) 0.62700(2) 0.29308(2) 0.01057(2) Uani 1 1 d . . . . .
C1 C 0.02218(13) 0.66777(13) 0.14505(8) 0.0231(4) Uani 1 1 d . . . . .
F1 F -0.02621(9) 0.73468(9) 0.16726(5) 0.0325(3) Uani 1 1 d . . . . .
N1 N 0.25431(10) 0.45984(9) 0.25654(6) 0.0135(2) Uani 1 1 d . . . . .
O1 O 0.14638(9) 0.65215(8) 0.22229(5) 0.0178(2) Uani 1 1 d . . . . .
F2 F 0.00719(10) 0.68248(12) 0.09141(5) 0.0425(4) Uani 1 1 d . . . . .
N2 N 0.44439(10) 0.52382(9) 0.27328(6) 0.0126(2) Uani 1 1 d . . . . .
O2 O 0.35025(9) 0.66685(8) 0.20709(5) 0.0154(2) Uani 1 1 d . . . . .
C2 C 0.13504(12) 0.66351(11) 0.17087(7) 0.0175(3) Uani 1 1 d . . . . .
F3 F -0.02550(10) 0.59073(10) 0.15375(7) 0.0472(4) Uani 1 1 d . . . . .
O3 O 0.22989(9) 0.76741(8) 0.33150(5) 0.0163(2) Uani 1 1 d . . . . .
C3 C 0.20771(13) 0.67074(12) 0.13705(7) 0.0188(3) Uani 1 1 d . . . . .
H3 H 0.185772 0.678063 0.098983 0.023 Uiso 1 1 calc R U . . .
F4 F 0.22774(11) 0.99396(9) 0.36582(9) 0.0567(5) Uani 1 1 d . . . . .
O4 O 0.43263(8) 0.72244(8) 0.32895(5) 0.0145(2) Uani 1 1 d . . . . .
C4 C 0.31516(12) 0.66763(11) 0.15708(7) 0.0152(3) Uani 1 1 d . . . . .
O5 O 0.16352(8) 0.56431(8) 0.34436(5) 0.0146(2) Uani 1 1 d . . . . .
C5 C 0.38950(13) 0.66255(11) 0.11770(7) 0.0163(3) Uani 1 1 d . . . . .
F5 F 0.18922(15) 0.89688(14) 0.42304(7) 0.0627(5) Uani 1 1 d . . . . .
O7 O 0.18903(9) 0.18885(8) 0.21960(5) 0.0194(2) Uani 1 1 d . . . . .
F7 F 0.00632(8) 0.44007(9) 0.34173(6) 0.0315(3) Uani 1 1 d . . . . .
C7 C 0.56638(13) 0.67709(12) 0.10173(7) 0.0174(3) Uani 1 1 d . . . . .
O6 O 0.37321(8) 0.54812(8) 0.37281(5) 0.0150(2) Uani 1 1 d . . . . .
C6 C 0.49019(13) 0.68559(12) 0.13553(7) 0.0183(3) Uani 1 1 d . . . . .
H6 H 0.508973 0.707869 0.171661 0.022 Uiso 1 1 calc R U . . .
F6 F 0.10449(9) 0.90191(10) 0.34280(7) 0.0439(4) Uani 1 1 d . . . . .
O8 O 0.69752(9) 0.35829(8) 0.27195(5) 0.0175(2) Uani 1 1 d . . . . .
F8 F 0.06423(9) 0.39790(9) 0.42353(6) 0.0350(3) Uani 1 1 d . . . . .
C8 C 0.66874(14) 0.70649(14) 0.11881(8) 0.0235(4) Uani 1 1 d . . . . .
H8 H 0.687126 0.733546 0.153760 0.028 Uiso 1 1 calc R U . . .
F9 F 0.00936(9) 0.53499(9) 0.40760(6) 0.0325(3) Uani 1 1 d . . . . .
C9 C 0.74104(14) 0.69625(14) 0.08545(8) 0.0247(4) Uani 1 1 d . . . . .
H9 H 0.809000 0.717342 0.096980 0.030 Uiso 1 1 calc R U . . .
C10 C 0.71527(16) 0.65453(14) 0.03403(8) 0.0254(4) Uani 1 1 d . . . . .
H10 H 0.766670 0.645746 0.011650 0.030 Uiso 1 1 calc R U . . .
C11 C 0.61732(16) 0.62659(14) 0.01599(7) 0.0247(4) Uani 1 1 d . . . . .
H11 H 0.601067 0.598966 -0.018926 0.030 Uiso 1 1 calc R U . . .
C12 C 0.53936(14) 0.63843(12) 0.04893(7) 0.0194(3) Uani 1 1 d . . . . .
C13 C 0.43536(15) 0.61553(13) 0.03091(7) 0.0231(4) Uani 1 1 d . . . . .
H13 H 0.416067 0.590329 -0.004472 0.028 Uiso 1 1 calc R U . . .
C14 C 0.36211(14) 0.62908(12) 0.06363(7) 0.0210(3) Uani 1 1 d . . . . .
H14 H 0.292340 0.615986 0.050040 0.025 Uiso 1 1 calc R U . . .
C15 C 0.19757(14) 0.90887(13) 0.37082(9) 0.0239(4) Uani 1 1 d . . . . .
C16 C 0.27208(12) 0.83873(11) 0.35229(7) 0.0150(3) Uani 1 1 d . . . . .
C18 C 0.45179(11) 0.79877(10) 0.35177(6) 0.0123(3) Uani 1 1 d . . . . .
C17 C 0.37558(12) 0.86036(11) 0.36316(7) 0.0155(3) Uani 1 1 d . . . . .
H17 H 0.395693 0.918104 0.378677 0.019 Uiso 1 1 calc R U . . .
C19 C 0.56217(11) 0.82171(11) 0.36872(6) 0.0128(3) Uani 1 1 d . . . . .
C20 C 0.62861(12) 0.75136(11) 0.38586(6) 0.0143(3) Uani 1 1 d . . . . .
H20 H 0.603420 0.690583 0.385368 0.017 Uiso 1 1 calc R U . . .
C21 C 0.73389(12) 0.76828(11) 0.40419(7) 0.0153(3) Uani 1 1 d . . . . .
C22 C 0.80153(13) 0.69860(13) 0.42745(8) 0.0216(3) Uani 1 1 d . . . . .
H22 H 0.776959 0.637993 0.429738 0.026 Uiso 1 1 calc R U . . .
C23 C 0.90227(14) 0.71833(15) 0.44667(9) 0.0269(4) Uani 1 1 d . . . . .
H23 H 0.946650 0.671688 0.463112 0.032 Uiso 1 1 calc R U . . .
C24 C 0.94029(14) 0.80758(15) 0.44213(9) 0.0279(4) Uani 1 1 d . . . . .
H24 H 1.010354 0.820398 0.455155 0.034 Uiso 1 1 calc R U . . .
C25 C 0.87724(13) 0.87566(14) 0.41919(8) 0.0228(3) Uani 1 1 d . . . . .
H25 H 0.904182 0.935097 0.415608 0.027 Uiso 1 1 calc R U . . .
C26 C 0.77154(12) 0.85833(11) 0.40061(7) 0.0157(3) Uani 1 1 d . . . . .
C27 C 0.70266(13) 0.92892(11) 0.38103(7) 0.0163(3) Uani 1 1 d . . . . .
H27 H 0.728060 0.988921 0.377443 0.020 Uiso 1 1 calc R U . . .
C28 C 0.59983(12) 0.91224(11) 0.36714(6) 0.0144(3) Uani 1 1 d . . . . .
H28 H 0.553839 0.961162 0.356470 0.017 Uiso 1 1 calc R U . . .
C29 C 0.06232(12) 0.46743(12) 0.38856(8) 0.0206(3) Uani 1 1 d . . . . .
C30 C 0.16808(11) 0.50001(11) 0.37889(7) 0.0143(3) Uani 1 1 d . . . . .
C31 C 0.25241(12) 0.45635(11) 0.40745(7) 0.0160(3) Uani 1 1 d . . . . .
H31 H 0.242186 0.406534 0.430515 0.019 Uiso 1 1 calc R U . . .
C32 C 0.35407(11) 0.48391(11) 0.40328(6) 0.0129(3) Uani 1 1 d . . . . .
C33 C 0.44317(11) 0.43626(10) 0.43555(6) 0.0121(3) Uani 1 1 d . . . . .
C34 C 0.53809(12) 0.44900(12) 0.42020(7) 0.0157(3) Uani 1 1 d . . . . .
H34 H 0.543902 0.485815 0.389313 0.019 Uiso 1 1 calc R U . . .
C35 C 0.62677(12) 0.40838(11) 0.44950(7) 0.0149(3) Uani 1 1 d . . . . .
C36 C 0.72554(13) 0.42192(15) 0.43481(8) 0.0252(4) Uani 1 1 d . . . . .
H36 H 0.732605 0.457361 0.403550 0.030 Uiso 1 1 calc R U . . .
C37 C 0.81071(14) 0.38423(16) 0.46540(9) 0.0289(4) Uani 1 1 d . . . . .
H37 H 0.876382 0.393707 0.455243 0.035 Uiso 1 1 calc R U . . .
C38 C 0.80121(14) 0.33155(14) 0.51180(8) 0.0248(4) Uani 1 1 d . . . . .
H38 H 0.860679 0.306038 0.532908 0.030 Uiso 1 1 calc R U . . .
C39 C 0.70729(13) 0.31679(13) 0.52674(7) 0.0207(3) Uani 1 1 d . . . . .
H39 H 0.702003 0.280957 0.558094 0.025 Uiso 1 1 calc R U . . .
C40 C 0.61749(12) 0.35447(11) 0.49589(6) 0.0141(3) Uani 1 1 d . . . . .
C41 C 0.51921(12) 0.34105(12) 0.51044(7) 0.0171(3) Uani 1 1 d . . . . .
H41 H 0.512217 0.304155 0.541137 0.021 Uiso 1 1 calc R U . . .
C42 C 0.43405(12) 0.38024(11) 0.48111(7) 0.0155(3) Uani 1 1 d . . . . .
H42 H 0.368552 0.369888 0.491300 0.019 Uiso 1 1 calc R U . . .
C43 C 0.32890(11) 0.39694(10) 0.25561(6) 0.0106(2) Uani 1 1 d . . . . .
C44 C 0.30671(12) 0.30609(10) 0.24339(6) 0.0126(3) Uani 1 1 d . . . . .
H44 H 0.360646 0.263153 0.243419 0.015 Uiso 1 1 calc R U . . .
C45 C 0.20446(12) 0.27797(10) 0.23103(6) 0.0133(3) Uani 1 1 d . . . . .
C46 C 0.12759(12) 0.34260(11) 0.23113(7) 0.0155(3) Uani 1 1 d . . . . .
H46 H 0.057290 0.326322 0.222465 0.019 Uiso 1 1 calc R U . . .
C47 C 0.15689(12) 0.43164(11) 0.24428(7) 0.0159(3) Uani 1 1 d . . . . .
H47 H 0.104280 0.475776 0.244643 0.019 Uiso 1 1 calc R U . . .
C48 C 0.43588(11) 0.43266(10) 0.26600(6) 0.0108(2) Uani 1 1 d . . . . .
C49 C 0.52099(11) 0.37728(10) 0.26598(6) 0.0128(3) Uani 1 1 d . . . . .
H49 H 0.513040 0.313177 0.261337 0.015 Uiso 1 1 calc R U . . .
C50 C 0.61861(11) 0.41658(10) 0.27286(6) 0.0130(3) Uani 1 1 d . . . . .
C51 C 0.62773(12) 0.51052(11) 0.27910(7) 0.0158(3) Uani 1 1 d . . . . .
H51 H 0.692711 0.539733 0.283137 0.019 Uiso 1 1 calc R U . . .
C52 C 0.53826(12) 0.56003(11) 0.27922(7) 0.0157(3) Uani 1 1 d . . . . .
H52 H 0.544173 0.624274 0.283841 0.019 Uiso 1 1 calc R U . . .
C53 C 0.08422(14) 0.15945(13) 0.20381(9) 0.0249(4) Uani 1 1 d . . . . .
H53A H 0.053411 0.192729 0.171067 0.037 Uiso 1 1 calc R U . . .
H53B H 0.045261 0.171852 0.233560 0.037 Uiso 1 1 calc R U . . .
H53C H 0.082860 0.093827 0.196085 0.037 Uiso 1 1 calc R U . . .
C54 C 0.79894(12) 0.39571(13) 0.28167(9) 0.0224(4) Uani 1 1 d . . . . .
H54A H 0.848911 0.347394 0.278298 0.034 Uiso 1 1 calc R U . . .
H54B H 0.812304 0.421611 0.318509 0.034 Uiso 1 1 calc R U . . .
H54C H 0.805010 0.443719 0.254856 0.034 Uiso 1 1 calc R U . . .
 
loop_
 _atom_site_aniso_label
 _atom_site_aniso_U_11
 _atom_site_aniso_U_22
 _atom_site_aniso_U_33
 _atom_site_aniso_U_23
 _atom_site_aniso_U_13
 _atom_site_aniso_U_12
Pr1 0.00796(4) 0.00813(4) 0.01505(4) 0.00058(3) -0.00003(3) 0.00038(3)
C1 0.0151(7) 0.0237(9) 0.0274(9) 0.0001(7) -0.0059(6) 0.0010(6)
F1 0.0202(5) 0.0382(7) 0.0361(7) -0.0041(5) -0.0053(5) 0.0132(5)
N1 0.0101(5) 0.0120(6) 0.0178(6) -0.0011(5) 0.0005(5) 0.0005(4)
O1 0.0120(5) 0.0174(5) 0.0224(6) 0.0032(5) -0.0023(4) 0.0002(4)
F2 0.0225(6) 0.0761(11) 0.0248(6) -0.0018(7) -0.0089(5) 0.0108(6)
N2 0.0106(5) 0.0100(5) 0.0171(6) 0.0005(5) 0.0017(4) -0.0001(4)
O2 0.0151(5) 0.0146(5) 0.0155(5) 0.0020(4) -0.0003(4) -0.0009(4)
C2 0.0134(7) 0.0120(7) 0.0245(8) 0.0008(6) -0.0053(6) 0.0017(5)
F3 0.0225(6) 0.0312(7) 0.0798(11) 0.0072(7) -0.0174(7) -0.0119(5)
O3 0.0131(5) 0.0111(5) 0.0246(6) -0.0014(4) 0.0025(4) -0.0001(4)
C3 0.0174(7) 0.0186(8) 0.0180(7) 0.0012(6) -0.0046(6) 0.0014(6)
F4 0.0289(7) 0.0152(6) 0.1290(16) -0.0166(8) 0.0213(8) 0.0016(5)
O4 0.0118(5) 0.0116(5) 0.0196(5) -0.0016(4) 0.0003(4) -0.0005(4)
C4 0.0164(7) 0.0103(6) 0.0180(7) 0.0015(5) -0.0006(5) 0.0001(5)
O5 0.0108(5) 0.0132(5) 0.0197(5) 0.0023(4) 0.0018(4) 0.0009(4)
C5 0.0191(7) 0.0135(7) 0.0154(7) 0.0029(5) 0.0002(6) -0.0006(6)
F5 0.0661(11) 0.0852(13) 0.0415(9) -0.0032(9) 0.0234(8) 0.0433(10)
O7 0.0165(5) 0.0115(5) 0.0296(6) -0.0045(5) 0.0011(5) -0.0041(4)
F7 0.0142(5) 0.0326(6) 0.0449(7) 0.0012(5) -0.0041(5) -0.0084(4)
C7 0.0202(7) 0.0175(7) 0.0142(7) 0.0007(6) 0.0015(6) 0.0016(6)
O6 0.0111(5) 0.0160(5) 0.0172(5) 0.0047(4) 0.0004(4) -0.0006(4)
C6 0.0190(7) 0.0206(8) 0.0143(7) -0.0020(6) -0.0001(6) 0.0004(6)
F6 0.0167(5) 0.0348(7) 0.0763(11) -0.0250(7) -0.0051(6) 0.0098(5)
O8 0.0079(5) 0.0124(5) 0.0311(6) -0.0024(5) -0.0005(4) 0.0016(4)
F8 0.0153(5) 0.0351(7) 0.0553(8) 0.0273(6) 0.0074(5) -0.0005(5)
C8 0.0188(8) 0.0321(10) 0.0188(8) -0.0036(7) 0.0005(6) 0.0017(7)
F9 0.0191(5) 0.0310(6) 0.0512(8) 0.0028(6) 0.0172(5) 0.0059(5)
C9 0.0195(8) 0.0326(10) 0.0217(8) 0.0042(7) 0.0026(6) 0.0058(7)
C10 0.0285(9) 0.0311(10) 0.0180(8) 0.0055(7) 0.0077(7) 0.0069(8)
C11 0.0339(10) 0.0269(9) 0.0141(7) 0.0007(7) 0.0068(7) -0.0003(8)
C12 0.0272(8) 0.0179(8) 0.0129(7) 0.0026(6) 0.0026(6) -0.0017(6)
C13 0.0316(9) 0.0243(9) 0.0123(7) 0.0008(6) 0.0005(6) -0.0082(7)
C14 0.0250(8) 0.0215(8) 0.0148(7) 0.0039(6) -0.0020(6) -0.0077(7)
C15 0.0176(8) 0.0178(8) 0.0365(10) -0.0068(7) 0.0050(7) 0.0026(6)
C16 0.0153(7) 0.0123(7) 0.0177(7) 0.0004(5) 0.0029(5) 0.0023(5)
C18 0.0119(6) 0.0120(6) 0.0126(6) 0.0013(5) 0.0004(5) -0.0014(5)
C17 0.0150(7) 0.0113(7) 0.0196(7) -0.0025(5) 0.0013(5) -0.0008(5)
C19 0.0118(6) 0.0140(7) 0.0123(6) -0.0012(5) 0.0011(5) -0.0021(5)
C20 0.0135(7) 0.0143(7) 0.0155(7) -0.0006(5) 0.0029(5) -0.0011(5)
C21 0.0127(7) 0.0181(7) 0.0151(7) -0.0020(6) 0.0022(5) 0.0006(5)
C22 0.0157(7) 0.0225(8) 0.0263(9) -0.0017(7) 0.0017(6) 0.0040(6)
C23 0.0149(8) 0.0311(10) 0.0334(10) -0.0023(8) -0.0001(7) 0.0070(7)
C24 0.0123(7) 0.0362(11) 0.0343(10) -0.0063(8) 0.0005(7) 0.0003(7)
C25 0.0146(7) 0.0279(9) 0.0261(9) -0.0065(7) 0.0033(6) -0.0055(6)
C26 0.0139(7) 0.0186(7) 0.0150(7) -0.0030(6) 0.0038(5) -0.0021(5)
C27 0.0170(7) 0.0157(7) 0.0161(7) -0.0023(6) 0.0023(6) -0.0046(6)
C28 0.0150(7) 0.0134(7) 0.0145(7) -0.0004(5) 0.0011(5) -0.0011(5)
C29 0.0107(7) 0.0190(8) 0.0318(9) 0.0076(7) 0.0026(6) 0.0005(6)
C30 0.0088(6) 0.0131(7) 0.0208(7) 0.0005(6) 0.0022(5) -0.0006(5)
C31 0.0106(6) 0.0148(7) 0.0223(8) 0.0054(6) 0.0019(5) -0.0004(5)
C32 0.0105(6) 0.0125(6) 0.0153(7) -0.0002(5) 0.0006(5) 0.0006(5)
C33 0.0103(6) 0.0117(6) 0.0136(6) 0.0006(5) -0.0004(5) 0.0008(5)
C34 0.0114(6) 0.0189(7) 0.0166(7) 0.0044(6) 0.0017(5) 0.0009(5)
C35 0.0105(6) 0.0168(7) 0.0171(7) 0.0008(6) 0.0014(5) 0.0015(5)
C36 0.0130(7) 0.0357(10) 0.0276(9) 0.0085(8) 0.0054(6) 0.0029(7)
C37 0.0118(7) 0.0391(11) 0.0357(10) 0.0058(9) 0.0037(7) 0.0047(7)
C38 0.0137(7) 0.0262(9) 0.0323(10) 0.0025(7) -0.0029(7) 0.0064(6)
C39 0.0169(7) 0.0210(8) 0.0226(8) 0.0047(6) -0.0022(6) 0.0040(6)
C40 0.0133(6) 0.0130(6) 0.0153(7) 0.0001(5) -0.0003(5) 0.0025(5)
C41 0.0155(7) 0.0187(7) 0.0169(7) 0.0054(6) 0.0020(6) 0.0005(6)
C42 0.0119(6) 0.0177(7) 0.0172(7) 0.0025(6) 0.0030(5) -0.0003(5)
C43 0.0095(6) 0.0111(6) 0.0109(6) 0.0003(5) 0.0003(5) -0.0006(5)
C44 0.0121(6) 0.0120(6) 0.0133(6) -0.0005(5) 0.0005(5) -0.0001(5)
C45 0.0144(7) 0.0113(6) 0.0138(7) -0.0015(5) 0.0010(5) -0.0030(5)
C46 0.0107(6) 0.0160(7) 0.0191(7) -0.0016(6) 0.0001(5) -0.0023(5)
C47 0.0103(6) 0.0147(7) 0.0221(8) -0.0022(6) 0.0006(5) 0.0006(5)
C48 0.0097(6) 0.0116(6) 0.0107(6) -0.0001(5) 0.0004(5) -0.0006(5)
C49 0.0115(6) 0.0110(6) 0.0152(7) -0.0015(5) 0.0002(5) -0.0001(5)
C50 0.0099(6) 0.0121(6) 0.0162(7) -0.0006(5) -0.0001(5) 0.0017(5)
C51 0.0107(6) 0.0139(7) 0.0225(8) -0.0012(6) 0.0020(5) -0.0011(5)
C52 0.0130(7) 0.0103(6) 0.0239(8) -0.0013(6) 0.0033(6) -0.0012(5)
C53 0.0192(8) 0.0184(8) 0.0361(10) -0.0081(7) 0.0012(7) -0.0084(6)
C54 0.0075(6) 0.0210(8) 0.0376(10) -0.0062(7) 0.0002(6) 0.0003(6)
 
_geom_special_details
;
 All esds (except the esd in the dihedral angle between two l.s. planes)
 are estimated using the full covariance matrix.  The cell esds are taken
 into account individually in the estimation of esds in distances, angles
 and torsion angles; correlations between esds in cell parameters are only
 used when they are defined by crystal symmetry.  An approximate (isotropic)
 treatment of cell esds is used for estimating esds involving l.s. planes.
;
 
loop_
 _geom_bond_atom_site_label_1
 _geom_bond_atom_site_label_2
 _geom_bond_distance
 _geom_bond_site_symmetry_2
 _geom_bond_publ_flag
Pr1 O1 2.4035(12) . ?
Pr1 O4 2.4036(11) . ?
Pr1 O6 2.4045(11) . ?
Pr1 O5 2.4300(12) . ?
Pr1 O3 2.4499(12) . ?
Pr1 O2 2.4610(12) . ?
Pr1 N1 2.6284(13) . ?
Pr1 N2 2.6455(13) . ?
C1 F3 1.326(2) . ?
C1 F2 1.332(2) . ?
C1 F1 1.335(2) . ?
C1 C2 1.529(2) . ?
N1 C47 1.3400(19) . ?
N1 C43 1.3516(19) . ?
O1 C2 1.272(2) . ?
N2 C52 1.335(2) . ?
N2 C48 1.3501(19) . ?
O2 C4 1.255(2) . ?
C2 C3 1.373(3) . ?
O3 C16 1.257(2) . ?
C3 C4 1.429(2) . ?
C3 H3 0.9500 . ?
F4 C15 1.320(2) . ?
O4 C18 1.2612(19) . ?
C4 C5 1.490(2) . ?
O5 C30 1.2684(19) . ?
C5 C6 1.376(2) . ?
C5 C14 1.421(2) . ?
F5 C15 1.329(3) . ?
O7 C45 1.3449(19) . ?
O7 C53 1.444(2) . ?
F7 C29 1.338(2) . ?
C7 C6 1.412(2) . ?
C7 C8 1.419(2) . ?
C7 C12 1.421(2) . ?
O6 C32 1.2571(19) . ?
C6 H6 0.9500 . ?
F6 C15 1.318(2) . ?
O8 C50 1.3499(18) . ?
O8 C54 1.4322(19) . ?
F8 C29 1.336(2) . ?
C8 C9 1.365(3) . ?
C8 H8 0.9500 . ?
F9 C29 1.340(2) . ?
C9 C10 1.408(3) . ?
C9 H9 0.9500 . ?
C10 C11 1.364(3) . ?
C10 H10 0.9500 . ?
C11 C12 1.421(3) . ?
C11 H11 0.9500 . ?
C12 C13 1.417(3) . ?
C13 C14 1.370(3) . ?
C13 H13 0.9500 . ?
C14 H14 0.9500 . ?
C15 C16 1.541(2) . ?
C16 C17 1.388(2) . ?
C18 C17 1.412(2) . ?
C18 C19 1.491(2) . ?
C17 H17 0.9500 . ?
C19 C20 1.377(2) . ?
C19 C28 1.419(2) . ?
C20 C21 1.416(2) . ?
C20 H20 0.9500 . ?
C21 C26 1.417(2) . ?
C21 C22 1.419(2) . ?
C22 C23 1.372(2) . ?
C22 H22 0.9500 . ?
C23 C24 1.411(3) . ?
C23 H23 0.9500 . ?
C24 C25 1.365(3) . ?
C24 H24 0.9500 . ?
C25 C26 1.423(2) . ?
C25 H25 0.9500 . ?
C26 C27 1.413(2) . ?
C27 C28 1.370(2) . ?
C27 H27 0.9500 . ?
C28 H28 0.9500 . ?
C29 C30 1.529(2) . ?
C30 C31 1.380(2) . ?
C31 C32 1.420(2) . ?
C31 H31 0.9500 . ?
C32 C33 1.490(2) . ?
C33 C34 1.378(2) . ?
C33 C42 1.417(2) . ?
C34 C35 1.410(2) . ?
C34 H34 0.9500 . ?
C35 C40 1.417(2) . ?
C35 C36 1.421(2) . ?
C36 C37 1.371(3) . ?
C36 H36 0.9500 . ?
C37 C38 1.408(3) . ?
C37 H37 0.9500 . ?
C38 C39 1.365(3) . ?
C38 H38 0.9500 . ?
C39 C40 1.419(2) . ?
C39 H39 0.9500 . ?
C40 C41 1.414(2) . ?
C41 C42 1.367(2) . ?
C41 H41 0.9500 . ?
C42 H42 0.9500 . ?
C43 C44 1.386(2) . ?
C43 C48 1.491(2) . ?
C44 C45 1.399(2) . ?
C44 H44 0.9500 . ?
C45 C46 1.388(2) . ?
C46 C47 1.385(2) . ?
C46 H46 0.9500 . ?
C47 H47 0.9500 . ?
C48 C49 1.386(2) . ?
C49 C50 1.398(2) . ?
C49 H49 0.9500 . ?
C50 C51 1.388(2) . ?
C51 C52 1.387(2) . ?
C51 H51 0.9500 . ?
C52 H52 0.9500 . ?
C53 H53A 0.9800 . ?
C53 H53B 0.9800 . ?
C53 H53C 0.9800 . ?
C54 H54A 0.9800 . ?
C54 H54B 0.9800 . ?
C54 H54C 0.9800 . ?
 
loop_
 _geom_angle_atom_site_label_1
 _geom_angle_atom_site_label_2
 _geom_angle_atom_site_label_3
 _geom_angle
 _geom_angle_site_symmetry_1
 _geom_angle_site_symmetry_3
 _geom_angle_publ_flag
O1 Pr1 O4 131.69(4) . . ?
O1 Pr1 O6 151.98(4) . . ?
O4 Pr1 O6 75.10(4) . . ?
O1 Pr1 O5 85.02(4) . . ?
O4 Pr1 O5 126.06(4) . . ?
O6 Pr1 O5 69.59(4) . . ?
O1 Pr1 O3 83.67(4) . . ?
O4 Pr1 O3 69.50(4) . . ?
O6 Pr1 O3 102.58(4) . . ?
O5 Pr1 O3 79.86(4) . . ?
O1 Pr1 O2 69.80(4) . . ?
O4 Pr1 O2 80.92(4) . . ?
O6 Pr1 O2 131.21(4) . . ?
O5 Pr1 O2 152.21(4) . . ?
O3 Pr1 O2 107.81(4) . . ?
O1 Pr1 N1 79.19(4) . . ?
O4 Pr1 N1 139.25(4) . . ?
O6 Pr1 N1 82.55(4) . . ?
O5 Pr1 N1 74.21(4) . . ?
O3 Pr1 N1 149.92(4) . . ?
O2 Pr1 N1 89.23(4) . . ?
O1 Pr1 N2 119.66(4) . . ?
O4 Pr1 N2 79.54(4) . . ?
O6 Pr1 N2 67.09(4) . . ?
O5 Pr1 N2 119.54(4) . . ?
O3 Pr1 N2 149.01(4) . . ?
O2 Pr1 N2 67.15(4) . . ?
N1 Pr1 N2 60.34(4) . . ?
F3 C1 F2 107.43(17) . . ?
F3 C1 F1 106.74(17) . . ?
F2 C1 F1 106.69(15) . . ?
F3 C1 C2 110.69(15) . . ?
F2 C1 C2 114.14(16) . . ?
F1 C1 C2 110.78(15) . . ?
C47 N1 C43 117.52(13) . . ?
C47 N1 Pr1 118.64(10) . . ?
C43 N1 Pr1 123.34(10) . . ?
C2 O1 Pr1 135.20(11) . . ?
C52 N2 C48 117.67(13) . . ?
C52 N2 Pr1 118.80(10) . . ?
C48 N2 Pr1 122.66(10) . . ?
C4 O2 Pr1 137.70(11) . . ?
O1 C2 C3 129.66(15) . . ?
O1 C2 C1 112.38(16) . . ?
C3 C2 C1 117.95(16) . . ?
C16 O3 Pr1 135.10(10) . . ?
C2 C3 C4 122.35(15) . . ?
C2 C3 H3 118.8 . . ?
C4 C3 H3 118.8 . . ?
C18 O4 Pr1 140.63(10) . . ?
O2 C4 C3 122.54(16) . . ?
O2 C4 C5 117.91(14) . . ?
C3 C4 C5 119.52(15) . . ?
C30 O5 Pr1 132.06(10) . . ?
C6 C5 C14 118.65(16) . . ?
C6 C5 C4 118.58(15) . . ?
C14 C5 C4 122.63(15) . . ?
C45 O7 C53 117.01(14) . . ?
C6 C7 C8 121.95(16) . . ?
C6 C7 C12 118.87(16) . . ?
C8 C7 C12 119.18(16) . . ?
C32 O6 Pr1 138.20(10) . . ?
C5 C6 C7 121.95(16) . . ?
C5 C6 H6 119.0 . . ?
C7 C6 H6 119.0 . . ?
C50 O8 C54 117.31(13) . . ?
C9 C8 C7 120.57(17) . . ?
C9 C8 H8 119.7 . . ?
C7 C8 H8 119.7 . . ?
C8 C9 C10 120.25(18) . . ?
C8 C9 H9 119.9 . . ?
C10 C9 H9 119.9 . . ?
C11 C10 C9 120.73(18) . . ?
C11 C10 H10 119.6 . . ?
C9 C10 H10 119.6 . . ?
C10 C11 C12 120.61(17) . . ?
C10 C11 H11 119.7 . . ?
C12 C11 H11 119.7 . . ?
C13 C12 C7 118.53(16) . . ?
C13 C12 C11 122.87(16) . . ?
C7 C12 C11 118.58(17) . . ?
C14 C13 C12 121.16(16) . . ?
C14 C13 H13 119.4 . . ?
C12 C13 H13 119.4 . . ?
C13 C14 C5 120.64(16) . . ?
C13 C14 H14 119.7 . . ?
C5 C14 H14 119.7 . . ?
F6 C15 F4 107.07(17) . . ?
F6 C15 F5 106.99(18) . . ?
F4 C15 F5 106.76(19) . . ?
F6 C15 C16 112.15(15) . . ?
F4 C15 C16 112.68(16) . . ?
F5 C15 C16 110.86(16) . . ?
O3 C16 C17 129.06(15) . . ?
O3 C16 C15 114.46(14) . . ?
C17 C16 C15 116.39(15) . . ?
O4 C18 C17 123.84(14) . . ?
O4 C18 C19 116.46(14) . . ?
C17 C18 C19 119.67(14) . . ?
C16 C17 C18 121.71(14) . . ?
C16 C17 H17 119.1 . . ?
C18 C17 H17 119.1 . . ?
C20 C19 C28 119.93(14) . . ?
C20 C19 C18 117.78(14) . . ?
C28 C19 C18 122.29(14) . . ?
C19 C20 C21 120.97(15) . . ?
C19 C20 H20 119.5 . . ?
C21 C20 H20 119.5 . . ?
C20 C21 C26 118.63(15) . . ?
C20 C21 C22 121.95(16) . . ?
C26 C21 C22 119.38(15) . . ?
C23 C22 C21 120.30(18) . . ?
C23 C22 H22 119.9 . . ?
C21 C22 H22 119.8 . . ?
C22 C23 C24 120.34(18) . . ?
C22 C23 H23 119.8 . . ?
C24 C23 H23 119.8 . . ?
C25 C24 C23 120.58(17) . . ?
C25 C24 H24 119.7 . . ?
C23 C24 H24 119.7 . . ?
C24 C25 C26 120.55(18) . . ?
C24 C25 H25 119.7 . . ?
C26 C25 H25 119.7 . . ?
C27 C26 C21 119.32(14) . . ?
C27 C26 C25 121.83(16) . . ?
C21 C26 C25 118.79(16) . . ?
C28 C27 C26 121.06(15) . . ?
C28 C27 H27 119.5 . . ?
C26 C27 H27 119.5 . . ?
C27 C28 C19 119.84(15) . . ?
C27 C28 H28 120.1 . . ?
C19 C28 H28 120.1 . . ?
F8 C29 F7 106.71(15) . . ?
F8 C29 F9 107.02(16) . . ?
F7 C29 F9 106.22(14) . . ?
F8 C29 C30 114.49(14) . . ?
F7 C29 C30 110.61(15) . . ?
F9 C29 C30 111.34(14) . . ?
O5 C30 C31 129.84(15) . . ?
O5 C30 C29 112.90(13) . . ?
C31 C30 C29 117.26(14) . . ?
C30 C31 C32 121.79(15) . . ?
C30 C31 H31 119.1 . . ?
C32 C31 H31 119.1 . . ?
O6 C32 C31 122.48(14) . . ?
O6 C32 C33 117.26(13) . . ?
C31 C32 C33 120.26(14) . . ?
C34 C33 C42 119.51(14) . . ?
C34 C33 C32 117.66(14) . . ?
C42 C33 C32 122.82(14) . . ?
C33 C34 C35 121.22(15) . . ?
C33 C34 H34 119.4 . . ?
C35 C34 H34 119.4 . . ?
C34 C35 C40 118.97(14) . . ?
C34 C35 C36 122.02(16) . . ?
C40 C35 C36 118.99(15) . . ?
C37 C36 C35 120.53(18) . . ?
C37 C36 H36 119.7 . . ?
C35 C36 H36 119.7 . . ?
C36 C37 C38 120.26(17) . . ?
C36 C37 H37 119.9 . . ?
C38 C37 H37 119.9 . . ?
C39 C38 C37 120.58(16) . . ?
C39 C38 H38 119.7 . . ?
C37 C38 H38 119.7 . . ?
C38 C39 C40 120.64(17) . . ?
C38 C39 H39 119.7 . . ?
C40 C39 H39 119.7 . . ?
C41 C40 C35 118.93(14) . . ?
C41 C40 C39 122.08(15) . . ?
C35 C40 C39 118.98(15) . . ?
C42 C41 C40 121.14(15) . . ?
C42 C41 H41 119.4 . . ?
C40 C41 H41 119.4 . . ?
C41 C42 C33 120.20(15) . . ?
C41 C42 H42 119.9 . . ?
C33 C42 H42 119.9 . . ?
N1 C43 C44 121.92(14) . . ?
N1 C43 C48 115.53(13) . . ?
C44 C43 C48 122.50(13) . . ?
C43 C44 C45 119.64(14) . . ?
C43 C44 H44 120.2 . . ?
C45 C44 H44 120.2 . . ?
O7 C45 C46 125.16(14) . . ?
O7 C45 C44 116.20(14) . . ?
C46 C45 C44 118.65(14) . . ?
C47 C46 C45 117.73(14) . . ?
C47 C46 H46 121.1 . . ?
C45 C46 H46 121.1 . . ?
N1 C47 C46 124.53(15) . . ?
N1 C47 H47 117.7 . . ?
C46 C47 H47 117.7 . . ?
N2 C48 C49 121.90(14) . . ?
N2 C48 C43 115.30(13) . . ?
C49 C48 C43 122.74(13) . . ?
C48 C49 C50 119.41(14) . . ?
C48 C49 H49 120.3 . . ?
C50 C49 H49 120.3 . . ?
O8 C50 C51 125.12(14) . . ?
O8 C50 C49 115.90(14) . . ?
C51 C50 C49 118.98(14) . . ?
C52 C51 C50 117.37(14) . . ?
C52 C51 H51 121.3 . . ?
C50 C51 H51 121.3 . . ?
N2 C52 C51 124.64(15) . . ?
N2 C52 H52 117.7 . . ?
C51 C52 H52 117.7 . . ?
O7 C53 H53A 109.5 . . ?
O7 C53 H53B 109.5 . . ?
H53A C53 H53B 109.5 . . ?
O7 C53 H53C 109.5 . . ?
H53A C53 H53C 109.5 . . ?
H53B C53 H53C 109.5 . . ?
O8 C54 H54A 109.5 . . ?
O8 C54 H54B 109.5 . . ?
H54A C54 H54B 109.5 . . ?
O8 C54 H54C 109.5 . . ?
H54A C54 H54C 109.5 . . ?
H54B C54 H54C 109.5 . . ?
 
_refine_diff_density_max    1.182
_refine_diff_density_min   -1.100
_refine_diff_density_rms    0.074

_shelx_res_file
;
TITL RF1933  [PrL3(4,4'-MeO2-bipy)] in P2(1)/c
    rf1933.res
    created by SHELXL-2016/6 at 21:56:39 on 23-Nov-2020
CELL  0.71073  13.2021  14.6509  24.8108   90.000   98.938   90.000
ZERR    4.000   0.0005   0.0006   0.0010    0.000    0.002    0.000
LATT  1
SYMM -X, 1/2+Y, 1/2-Z
SFAC C H N O F Pr
UNIT 216 144 8 32 36 4
L.S. 20
BOND $H
LIST 6
FMAP 2
PLAN 15
HTAB
ACTA 52

TEMP -173.15
SIZE 0.22 0.18 0.11

WGHT    0.017900    6.405500
FVAR       0.06606
PR1   6    0.289888    0.627003    0.293085    11.00000    0.00796    0.00813 =
         0.01505    0.00058   -0.00003    0.00038
C1    1    0.022179    0.667774    0.145048    11.00000    0.01510    0.02375 =
         0.02739    0.00014   -0.00589    0.00103
F1    5   -0.026213    0.734678    0.167257    11.00000    0.02021    0.03816 =
         0.03607   -0.00409   -0.00532    0.01319
N1    3    0.254305    0.459842    0.256542    11.00000    0.01010    0.01200 =
         0.01777   -0.00111    0.00047    0.00045
O1    4    0.146379    0.652154    0.222288    11.00000    0.01201    0.01744 =
         0.02236    0.00321   -0.00227    0.00021
F2    5    0.007193    0.682481    0.091409    11.00000    0.02252    0.07611 =
         0.02476   -0.00180   -0.00893    0.01081
N2    3    0.444392    0.523818    0.273285    11.00000    0.01059    0.00996 =
         0.01709    0.00045    0.00172   -0.00014
O2    4    0.350247    0.666851    0.207087    11.00000    0.01513    0.01460 =
         0.01550    0.00195   -0.00028   -0.00093
C2    1    0.135040    0.663512    0.170867    11.00000    0.01344    0.01199 =
         0.02445    0.00082   -0.00525    0.00171
F3    5   -0.025504    0.590730    0.153745    11.00000    0.02249    0.03121 =
         0.07982    0.00721   -0.01740   -0.01190
O3    4    0.229886    0.767410    0.331496    11.00000    0.01306    0.01106 =
         0.02459   -0.00144    0.00253   -0.00007
C3    1    0.207709    0.670735    0.137052    11.00000    0.01739    0.01858 =
         0.01799    0.00120   -0.00462    0.00141
AFIX  43
H3    2    0.185772    0.678063    0.098983    11.00000   -1.20000
AFIX   0
F4    5    0.227743    0.993964    0.365820    11.00000    0.02885    0.01517 =
         0.12896   -0.01661    0.02133    0.00164
O4    4    0.432629    0.722443    0.328950    11.00000    0.01176    0.01158 =
         0.01960   -0.00160    0.00027   -0.00052
C4    1    0.315164    0.667625    0.157081    11.00000    0.01643    0.01026 =
         0.01799    0.00147   -0.00062    0.00011
O5    4    0.163523    0.564310    0.344360    11.00000    0.01076    0.01322 =
         0.01967    0.00227    0.00180    0.00092
C5    1    0.389498    0.662546    0.117698    11.00000    0.01912    0.01347 =
         0.01544    0.00286    0.00025   -0.00063
F5    5    0.189223    0.896875    0.423041    11.00000    0.06607    0.08520 =
         0.04151   -0.00318    0.02342    0.04329
O7    4    0.189030    0.188846    0.219598    11.00000    0.01651    0.01147 =
         0.02956   -0.00447    0.00109   -0.00414
F7    5    0.006318    0.440066    0.341732    11.00000    0.01415    0.03258 =
         0.04488    0.00119   -0.00409   -0.00840
C7    1    0.566383    0.677086    0.101726    11.00000    0.02019    0.01752 =
         0.01423    0.00069    0.00152    0.00162
O6    4    0.373215    0.548124    0.372806    11.00000    0.01106    0.01600 =
         0.01723    0.00468    0.00035   -0.00063
C6    1    0.490186    0.685586    0.135533    11.00000    0.01901    0.02061 =
         0.01434   -0.00201   -0.00006    0.00039
AFIX  43
H6    2    0.508973    0.707869    0.171661    11.00000   -1.20000
AFIX   0
F6    5    0.104494    0.901914    0.342800    11.00000    0.01665    0.03484 =
         0.07634   -0.02503   -0.00508    0.00984
O8    4    0.697519    0.358292    0.271954    11.00000    0.00793    0.01237 =
         0.03114   -0.00244   -0.00048    0.00158
F8    5    0.064226    0.397897    0.423527    11.00000    0.01531    0.03508 =
         0.05529    0.02728    0.00742   -0.00053
C8    1    0.668744    0.706494    0.118810    11.00000    0.01878    0.03209 =
         0.01882   -0.00356    0.00049    0.00174
AFIX  43
H8    2    0.687126    0.733546    0.153760    11.00000   -1.20000
AFIX   0
F9    5    0.009364    0.534994    0.407599    11.00000    0.01905    0.03097 =
         0.05117    0.00278    0.01721    0.00588
C9    1    0.741045    0.696246    0.085450    11.00000    0.01953    0.03263 =
         0.02169    0.00423    0.00258    0.00576
AFIX  43
H9    2    0.809000    0.717342    0.096980    11.00000   -1.20000
AFIX   0
C10   1    0.715268    0.654532    0.034030    11.00000    0.02849    0.03109 =
         0.01798    0.00554    0.00775    0.00692
AFIX  43
H10   2    0.766670    0.645746    0.011650    11.00000   -1.20000
AFIX   0
C11   1    0.617317    0.626594    0.015988    11.00000    0.03394    0.02693 =
         0.01411    0.00073    0.00675   -0.00027
AFIX  43
H11   2    0.601067    0.598966   -0.018926    11.00000   -1.20000
AFIX   0
C12   1    0.539360    0.638433    0.048931    11.00000    0.02716    0.01795 =
         0.01289    0.00257    0.00261   -0.00174
C13   1    0.435361    0.615529    0.030914    11.00000    0.03163    0.02430 =
         0.01230    0.00076    0.00049   -0.00821
AFIX  43
H13   2    0.416067    0.590329   -0.004472    11.00000   -1.20000
AFIX   0
C14   1    0.362112    0.629083    0.063630    11.00000    0.02498    0.02153 =
         0.01482    0.00393   -0.00203   -0.00770
AFIX  43
H14   2    0.292340    0.615986    0.050040    11.00000   -1.20000
AFIX   0
C15   1    0.197571    0.908872    0.370818    11.00000    0.01761    0.01779 =
         0.03653   -0.00683    0.00498    0.00259
C16   1    0.272085    0.838728    0.352290    11.00000    0.01528    0.01226 =
         0.01772    0.00043    0.00295    0.00226
C18   1    0.451793    0.798770    0.351770    11.00000    0.01188    0.01201 =
         0.01259    0.00131    0.00044   -0.00140
C17   1    0.375578    0.860364    0.363165    11.00000    0.01502    0.01131 =
         0.01964   -0.00253    0.00132   -0.00081
AFIX  43
H17   2    0.395693    0.918104    0.378677    11.00000   -1.20000
AFIX   0
C19   1    0.562171    0.821713    0.368719    11.00000    0.01183    0.01404 =
         0.01229   -0.00122    0.00112   -0.00213
C20   1    0.628615    0.751364    0.385857    11.00000    0.01353    0.01425 =
         0.01547   -0.00063    0.00292   -0.00114
AFIX  43
H20   2    0.603420    0.690583    0.385368    11.00000   -1.20000
AFIX   0
C21   1    0.733893    0.768283    0.404190    11.00000    0.01275    0.01805 =
         0.01514   -0.00203    0.00217    0.00058
C22   1    0.801528    0.698597    0.427454    11.00000    0.01566    0.02251 =
         0.02626   -0.00171    0.00173    0.00405
AFIX  43
H22   2    0.776959    0.637993    0.429738    11.00000   -1.20000
AFIX   0
C23   1    0.902268    0.718334    0.446670    11.00000    0.01493    0.03111 =
         0.03340   -0.00230   -0.00007    0.00705
AFIX  43
H23   2    0.946650    0.671688    0.463112    11.00000   -1.20000
AFIX   0
C24   1    0.940286    0.807579    0.442133    11.00000    0.01227    0.03622 =
         0.03429   -0.00626    0.00053    0.00026
AFIX  43
H24   2    1.010354    0.820398    0.455155    11.00000   -1.20000
AFIX   0
C25   1    0.877244    0.875661    0.419193    11.00000    0.01459    0.02786 =
         0.02609   -0.00645    0.00327   -0.00553
AFIX  43
H25   2    0.904182    0.935097    0.415608    11.00000   -1.20000
AFIX   0
C26   1    0.771538    0.858328    0.400611    11.00000    0.01392    0.01862 =
         0.01498   -0.00302    0.00378   -0.00210
C27   1    0.702657    0.928918    0.381032    11.00000    0.01704    0.01568 =
         0.01609   -0.00230    0.00233   -0.00456
AFIX  43
H27   2    0.728060    0.988921    0.377443    11.00000   -1.20000
AFIX   0
C28   1    0.599835    0.912245    0.367139    11.00000    0.01504    0.01337 =
         0.01452   -0.00042    0.00113   -0.00113
AFIX  43
H28   2    0.553839    0.961162    0.356470    11.00000   -1.20000
AFIX   0
C29   1    0.062324    0.467428    0.388562    11.00000    0.01072    0.01903 =
         0.03178    0.00759    0.00257    0.00045
C30   1    0.168076    0.500012    0.378888    11.00000    0.00884    0.01313 =
         0.02080    0.00049    0.00218   -0.00063
C31   1    0.252411    0.456354    0.407449    11.00000    0.01057    0.01480 =
         0.02229    0.00535    0.00189   -0.00041
AFIX  43
H31   2    0.242186    0.406534    0.430515    11.00000   -1.20000
AFIX   0
C32   1    0.354066    0.483906    0.403284    11.00000    0.01051    0.01253 =
         0.01528   -0.00021    0.00058    0.00061
C33   1    0.443174    0.436258    0.435548    11.00000    0.01034    0.01171 =
         0.01365    0.00063   -0.00042    0.00078
C34   1    0.538089    0.448996    0.420202    11.00000    0.01135    0.01890 =
         0.01664    0.00439    0.00169    0.00088
AFIX  43
H34   2    0.543902    0.485815    0.389313    11.00000   -1.20000
AFIX   0
C35   1    0.626772    0.408384    0.449504    11.00000    0.01054    0.01682 =
         0.01710    0.00075    0.00144    0.00146
C36   1    0.725541    0.421918    0.434813    11.00000    0.01297    0.03568 =
         0.02761    0.00853    0.00537    0.00290
AFIX  43
H36   2    0.732605    0.457361    0.403550    11.00000   -1.20000
AFIX   0
C37   1    0.810707    0.384230    0.465402    11.00000    0.01180    0.03915 =
         0.03571    0.00582    0.00366    0.00474
AFIX  43
H37   2    0.876382    0.393707    0.455243    11.00000   -1.20000
AFIX   0
C38   1    0.801215    0.331549    0.511802    11.00000    0.01374    0.02617 =
         0.03230    0.00252   -0.00288    0.00642
AFIX  43
H38   2    0.860679    0.306038    0.532908    11.00000   -1.20000
AFIX   0
C39   1    0.707290    0.316793    0.526741    11.00000    0.01686    0.02096 =
         0.02257    0.00467   -0.00224    0.00397
AFIX  43
H39   2    0.702003    0.280957    0.558094    11.00000   -1.20000
AFIX   0
C40   1    0.617488    0.354470    0.495887    11.00000    0.01333    0.01299 =
         0.01525    0.00012   -0.00029    0.00248
C41   1    0.519211    0.341047    0.510442    11.00000    0.01555    0.01870 =
         0.01687    0.00537    0.00200    0.00050
AFIX  43
H41   2    0.512217    0.304155    0.541137    11.00000   -1.20000
AFIX   0
C42   1    0.434046    0.380240    0.481108    11.00000    0.01187    0.01765 =
         0.01716    0.00252    0.00301   -0.00032
AFIX  43
H42   2    0.368552    0.369888    0.491300    11.00000   -1.20000
AFIX   0
C43   1    0.328896    0.396935    0.255606    11.00000    0.00953    0.01106 =
         0.01088    0.00026    0.00030   -0.00061
C44   1    0.306713    0.306086    0.243395    11.00000    0.01205    0.01203 =
         0.01332   -0.00055    0.00055   -0.00009
AFIX  43
H44   2    0.360646    0.263153    0.243419    11.00000   -1.20000
AFIX   0
C45   1    0.204457    0.277966    0.231033    11.00000    0.01444    0.01130 =
         0.01380   -0.00149    0.00095   -0.00298
C46   1    0.127590    0.342603    0.231128    11.00000    0.01074    0.01603 =
         0.01908   -0.00165    0.00009   -0.00232
AFIX  43
H46   2    0.057290    0.326322    0.222465    11.00000   -1.20000
AFIX   0
C47   1    0.156891    0.431644    0.244285    11.00000    0.01030    0.01469 =
         0.02214   -0.00216    0.00059    0.00058
AFIX  43
H47   2    0.104280    0.475776    0.244643    11.00000   -1.20000
AFIX   0
C48   1    0.435878    0.432655    0.266003    11.00000    0.00973    0.01156 =
         0.01067   -0.00012    0.00042   -0.00061
C49   1    0.520989    0.377277    0.265985    11.00000    0.01152    0.01100 =
         0.01517   -0.00146    0.00024   -0.00009
AFIX  43
H49   2    0.513040    0.313177    0.261337    11.00000   -1.20000
AFIX   0
C50   1    0.618610    0.416577    0.272864    11.00000    0.00992    0.01213 =
         0.01622   -0.00057   -0.00006    0.00167
C51   1    0.627730    0.510517    0.279103    11.00000    0.01072    0.01390 =
         0.02254   -0.00125    0.00199   -0.00112
AFIX  43
H51   2    0.692711    0.539733    0.283137    11.00000   -1.20000
AFIX   0
C52   1    0.538258    0.560027    0.279216    11.00000    0.01301    0.01033 =
         0.02394   -0.00129    0.00329   -0.00118
AFIX  43
H52   2    0.544173    0.624274    0.283841    11.00000   -1.20000
AFIX   0
C53   1    0.084221    0.159452    0.203809    11.00000    0.01921    0.01838 =
         0.03610   -0.00815    0.00125   -0.00841
AFIX 137
H53A  2    0.053411    0.192729    0.171067    11.00000   -1.50000
H53B  2    0.045261    0.171852    0.233560    11.00000   -1.50000
H53C  2    0.082860    0.093827    0.196085    11.00000   -1.50000
AFIX   0
C54   1    0.798942    0.395707    0.281671    11.00000    0.00749    0.02101 =
         0.03755   -0.00624    0.00023    0.00025
AFIX 137
H54A  2    0.848911    0.347394    0.278298    11.00000   -1.50000
H54B  2    0.812304    0.421611    0.318509    11.00000   -1.50000
H54C  2    0.805010    0.443719    0.254856    11.00000   -1.50000
AFIX   0
HKLF 4


REM  RF1933  [PrL3(4,4'-MeO2-bipy)] in P2(1)/c
REM R1 =  0.0260 for   13656 Fo > 4sig(Fo)  and  0.0290 for all   14586 data
REM    669 parameters refined using      0 restraints

END

WGHT      0.0178      6.4304

REM Instructions for potential hydrogen bonds
HTAB C52 O4

REM Highest difference peak  1.182,  deepest hole -1.100,  1-sigma level  0.074
Q1    1   0.2903  0.6143  0.3230  11.00000  0.05    1.18
Q2    1   0.2750  0.6156  0.2615  11.00000  0.05    0.95
Q3    1   0.3439  0.6250  0.2927  11.00000  0.05    0.75
Q4    1   0.2292  0.6231  0.2923  11.00000  0.05    0.65
Q5    1   0.1151  0.4834  0.3838  11.00000  0.05    0.61
Q6    1   0.2546  0.2940  0.2354  11.00000  0.05    0.55
Q7    1   0.4922  0.4423  0.4320  11.00000  0.05    0.54
Q8    1   0.4404  0.4156  0.4613  11.00000  0.05    0.53
Q9    1   0.6232  0.3801  0.4709  11.00000  0.05    0.52
Q10   1   0.1413  0.8679  0.4012  11.00000  0.05    0.51
Q11   1   0.5825  0.4238  0.4328  11.00000  0.05    0.51
Q12   1   0.0790  0.6643  0.1586  11.00000  0.05    0.51
Q13   1   0.4059  0.8262  0.3594  11.00000  0.05    0.50
Q14   1   0.3847  0.4136  0.2610  11.00000  0.05    0.50
Q15   1   0.1936  0.9766  0.3367  11.00000  0.05    0.50
;
_shelx_res_checksum    6205

_shelx_hkl_file
;
  -1   0   0  129.38    5.96
  -1   0   0  120.91    5.94
  -1   0   0  133.13    6.04
  -1   0   0  120.42    6.02
  -1   0   0  117.41    5.94
  -1   0   0  131.20    5.94
  -1   0   0  127.33    6.31
  -1   0   0  119.40    5.92
   1   0   0  111.32    5.94
   1   0   0  111.85    5.95
   1   0   0  130.79    5.95
   1   0   0  126.88    5.97
   1   0   0  117.83    5.94
   1   0   0  131.43    5.96
   1   0   0  108.62    5.96
   1   0   0  131.60    5.97
  -2   0   0  210.96   10.34
  -2   0   0  222.03   10.39
  -2   0   0  200.16   10.34
  -2   0   0  225.26   10.41
  -2   0   0  203.00   10.34
  -2   0   0  211.69   10.37
  -2   0   0  232.50   10.36
  -2   0   0  226.52   10.44
  -2   0   0  209.08   10.37
  -2   0   0  211.36   10.39
  -2   0   0  226.13   10.38
  -2   0   0  204.47   10.33
  -2   0   0  215.06   10.54
  -2   0   0  209.31   10.33
  -2   0   0  214.58   10.43
  -2   0   0  187.82   10.35
  -2   0   0  224.73   10.43
  -2   0   0  228.84   11.02
  -2   0   0  230.41   10.58
  -2   0   0  197.95   10.44
  -2   0   0  208.04   10.57
   2   0   0  207.02   10.33
   2   0   0  220.76   10.37
   2   0   0  224.78   10.40
   2   0   0  212.10   10.38
   2   0   0  217.71   10.61
   2   0   0  209.43   10.53
   2   0   0  219.39   10.32
   2   0   0  212.34   10.51
   2   0   0  203.31   10.30
   2   0   0  196.58   10.30
   2   0   0  227.00   10.39
   2   0   0  222.03   10.35
   2   0   0  238.76   11.12
   2   0   0  223.42   10.39
   2   0   0  216.21   10.45
   2   0   0  216.04   10.37
   2   0   0  212.47   10.35
   2   0   0  219.24   10.38
   2   0   0  204.13   10.40
   2   0   0  206.58   10.44
   2   0   0  194.43   10.31
  -3   0   0  123.40    5.67
  -3   0   0  118.98    5.73
  -3   0   0  123.24    5.71
  -3   0   0  117.36    5.71
  -3   0   0  115.78    5.68
  -3   0   0  111.76    5.74
  -3   0   0  126.82    5.73
  -3   0   0  122.93    5.89
  -3   0   0  124.72    5.73
  -3   0   0  107.68    5.67
  -3   0   0  117.60    5.83
  -3   0   0  114.90    5.75
  -3   0   0  111.34    5.72
  -3   0   0  109.86    5.70
  -3   0   0  126.02    5.73
  -3   0   0  115.46    5.71
  -3   0   0  128.40    5.73
  -3   0   0  112.44    5.93
  -3   0   0  113.90    5.67
  -3   0   0  117.24    5.70
  -3   0   0  122.90    5.74
  -3   0   0  111.54    5.68
   3   0   0  113.01    5.75
   3   0   0  114.25    5.73
   3   0   0  123.13    5.76
   3   0   0  129.70    5.73
   3   0   0  129.06    5.71
   3   0   0  112.54    5.71
   3   0   0  119.67    5.68
   3   0   0  120.73    5.71
   3   0   0  114.39    5.75
   3   0   0  113.54    5.73
   3   0   0  114.07    5.91
   3   0   0  114.15    5.82
   3   0   0  114.48    5.69
   3   0   0  111.19    5.70
   3   0   0  115.44    5.69
   3   0   0  119.50    5.67
   3   0   0  126.64    5.74
   3   0   0  114.66    5.73
   3   0   0  119.04    5.73
   3   0   0  128.07    5.91
   3   0   0  113.76    5.73
   3   0   0  109.51    5.70
  -4   0   0  132.91    6.41
  -4   0   0  130.93    6.40
  -4   0   0  124.81    6.48
  -4   0   0  139.99    6.40
  -4   0   0  135.22    6.48
  -4   0   0  132.25    6.41
  -4   0   0  128.19    6.44
  -4   0   0  126.03    6.46
  -4   0   0  128.28    6.43
  -4   0   0  138.45    6.48
  -4   0   0  135.01    6.40
  -4   0   0  142.85    6.46
  -4   0   0  129.59    6.50
  -4   0   0  143.07    6.69
  -4   0   0  130.99    6.61
  -4   0   0  133.54    6.43
  -4   0   0  133.42    6.45
  -4   0   0  120.99    6.73
  -4   0   0  131.03    6.43
  -4   0   0  128.07    6.39
  -4   0   0  141.80    6.39
  -4   0   0  128.94    6.43
  -4   0   0  134.73    6.48
   4   0   0  137.09    6.41
   4   0   0  127.04    6.45
   4   0   0  126.99    6.48
   4   0   0  123.99    6.49
   4   0   0  150.49    6.74
   4   0   0  133.64    6.48
   4   0   0  136.99    6.40
   4   0   0  135.19    6.42
   4   0   0  137.56    6.48
   4   0   0  137.94    6.42
   4   0   0  137.79    6.47
   4   0   0  131.93    6.72
   4   0   0  125.29    6.58
   4   0   0  128.84    6.50
   4   0   0  129.85    6.47
   4   0   0  125.93    6.44
   4   0   0  126.24    6.42
   4   0   0  133.93    6.40
   4   0   0  133.52    6.44
  -5   0   0    3.32    0.42
  -5   0   0    3.46    0.21
  -5   0   0    2.74    0.23
  -5   0   0    2.38    0.40
  -5   0   0    3.10    0.24
  -5   0   0    2.69    0.25
  -5   0   0    2.83    0.18
  -5   0   0    2.77    0.22
  -5   0   0    2.88    0.19
  -5   0   0    2.90    0.20
  -5   0   0    2.37    0.27
  -5   0   0    2.93    0.26
  -5   0   0    2.13    0.49
  -5   0   0    3.07    0.18
  -5   0   0    3.58    0.29
  -5   0   0    3.26    0.19
  -5   0   0    3.05    0.17
  -5   0   0    2.80    0.18
  -5   0   0    3.16    0.32
  -5   0   0    2.72    0.30
  -5   0   0    2.82    0.18
  -5   0   0    2.90    0.20
  -5   0   0    2.99    0.19
  -5   0   0    3.46    0.37
   5   0   0    2.84    0.22
   5   0   0    2.95    0.50
   5   0   0    2.91    0.31
   5   0   0    2.67    0.26
   5   0   0    2.73    0.21
   5   0   0    3.09    0.20
   5   0   0    3.30    0.21
   5   0   0    3.06    0.20
   5   0   0    2.99    0.26
   5   0   0    2.87    0.23
   5   0   0    3.53    0.43
   5   0   0    2.80    0.31
   5   0   0    2.64    0.39
   5   0   0    2.64    0.33
   5   0   0    2.89    0.22
   5   0   0    2.16    0.29
   5   0   0    2.54    0.32
   5   0   0    3.37    0.22
  -6   0   0    5.00    0.32
  -6   0   0    4.95    0.41
  -6   0   0    5.36    0.35
  -6   0   0    5.28    0.31
  -6   0   0    5.40    0.42
  -6   0   0    6.11    0.60
  -6   0   0    4.75    0.35
  -6   0   0    5.15    0.29
  -6   0   0    5.13    0.42
  -6   0   0    4.93    0.76
  -6   0   0    5.16    0.30
  -6   0   0    5.64    0.62
  -6   0   0    5.11    0.41
  -6   0   0    4.73    0.41
  -6   0   0    4.97    0.28
  -6   0   0    5.12    0.31
  -6   0   0    5.19    0.27
  -6   0   0    5.05    0.30
  -6   0   0    4.87    0.29
  -6   0   0    4.71    0.29
  -6   0   0    5.30    0.57
  -6   0   0    5.16    0.32
  -6   0   0    4.58    0.33
  -6   0   0    5.43    0.39
   6   0   0    4.97    0.43
   6   0   0    5.05    0.33
   6   0   0    5.04    0.34
   6   0   0    5.31    0.54
   6   0   0    5.69    0.44
   6   0   0    5.00    0.33
   6   0   0    4.53    0.31
   6   0   0    5.07    0.31
   6   0   0    5.01    0.38
   6   0   0    5.09    0.39
   6   0   0    5.04    0.45
   6   0   0    4.72    0.43
   6   0   0    5.13    0.73
   6   0   0    5.06    0.46
   6   0   0    5.49    0.33
   6   0   0    5.00    0.37
   6   0   0    4.52    0.34
   6   0   0    4.97    0.35
  -7   0   0  170.36    8.19
  -7   0   0  179.87    8.30
  -7   0   0  155.61    8.82
  -7   0   0  171.44    8.60
  -7   0   0  170.25    8.24
  -7   0   0  159.69    8.17
  -7   0   0  184.68    8.34
  -7   0   0  190.44    8.36
  -7   0   0  167.39    8.23
  -7   0   0  164.43    8.21
  -7   0   0  179.85    8.20
  -7   0   0  173.43    8.20
  -7   0   0  164.44    8.32
  -7   0   0  168.16    8.34
  -7   0   0  163.32    8.35
  -7   0   0  174.46    8.19
  -7   0   0  176.55    8.71
  -7   0   0  173.74    8.18
  -7   0   0  169.06    8.26
  -7   0   0  174.11    8.15
  -7   0   0  167.08    8.26
  -7   0   0  177.34    8.21
  -7   0   0  159.42    8.20
   7   0   0  180.04    8.29
   7   0   0  157.45    8.25
   7   0   0  176.37    8.24
   7   0   0  157.32    8.28
   7   0   0  159.28    8.37
   7   0   0  165.49    8.38
   7   0   0  170.31    8.22
   7   0   0  174.76    8.23
   7   0   0  169.84    8.22
   7   0   0  163.81    8.34
   7   0   0  171.03    8.21
   7   0   0  173.05    8.21
   7   0   0  164.17    8.24
   7   0   0  167.20    8.40
   7   0   0  172.62    8.35
   7   0   0  178.59    8.78
   7   0   0  159.35    8.30
   7   0   0  162.84    8.53
  -8   0   0   14.88    0.95
  -8   0   0   14.16    0.82
  -8   0   0   15.18    0.84
  -8   0   0   15.15    0.79
  -8   0   0   14.58    0.77
  -8   0   0   15.75    0.95
  -8   0   0   15.55    0.95
  -8   0   0   14.43    0.85
  -8   0   0   15.40    0.76
  -8   0   0   15.09    0.78
  -8   0   0   14.80    0.80
  -8   0   0   16.15    1.21
  -8   0   0   13.41    1.37
  -8   0   0   13.79    0.92
  -8   0   0   15.01    0.74
  -8   0   0   15.10    0.76
  -8   0   0   16.10    0.81
  -8   0   0   13.44    0.93
  -8   0   0   14.27    1.22
  -8   0   0   13.92    0.76
  -8   0   0   14.18    0.75
  -8   0   0   16.20    0.79
  -8   0   0   15.62    0.89
   8   0   0   13.40    0.97
   8   0   0   17.08    1.37
   8   0   0   14.24    0.85
   8   0   0   15.31    0.83
   8   0   0   15.30    0.84
   8   0   0   15.39    1.02
   8   0   0   16.36    0.97
   8   0   0   14.95    0.81
   8   0   0   13.40    0.96
   8   0   0   13.29    0.88
   8   0   0   13.24    0.85
   8   0   0   13.75    0.80
   8   0   0   14.20    0.91
   8   0   0   14.44    0.82
   8   0   0   14.96    0.89
   8   0   0   15.07    0.96
   8   0   0   13.14    1.09
  -9   0   0   18.87    1.00
  -9   0   0   19.77    1.22
  -9   0   0   19.57    1.00
  -9   0   0   19.35    1.02
  -9   0   0   19.66    1.04
  -9   0   0   19.08    1.00
  -9   0   0   22.70    1.17
  -9   0   0   18.15    1.18
  -9   0   0   18.81    1.10
  -9   0   0   19.92    1.50
  -9   0   0   21.56    1.04
  -9   0   0   20.59    0.97
  -9   0   0   19.25    1.21
  -9   0   0   20.55    1.09
  -9   0   0   20.38    1.05
  -9   0   0   19.37    1.00
  -9   0   0   20.35    1.58
  -9   0   0   19.66    1.21
  -9   0   0   22.09    1.23
  -9   0   0   17.16    1.69
  -9   0   0   20.80    1.04
  -9   0   0   20.09    1.08
  -9   0   0   20.35    1.02
   9   0   0   19.49    1.19
   9   0   0   18.70    1.05
   9   0   0   21.67    1.68
   9   0   0   19.82    1.17
   9   0   0   17.18    1.10
   9   0   0   18.63    1.26
   9   0   0   20.31    1.08
   9   0   0   18.58    1.22
   9   0   0   20.24    1.06
   9   0   0   19.06    1.10
   9   0   0   17.76    1.25
   9   0   0   18.54    1.08
   9   0   0   19.28    1.28
   9   0   0   21.37    1.25
 -10   0   0   62.18    3.04
 -10   0   0   50.77    3.80
 -10   0   0   60.04    2.94
 -10   0   0   61.32    3.19
 -10   0   0   60.07    2.98
 -10   0   0   67.65    3.01
 -10   0   0   61.73    3.57
 -10   0   0   60.48    3.67
 -10   0   0   64.02    2.90
 -10   0   0   62.58    2.90
 -10   0   0   60.39    3.17
 -10   0   0   58.93    2.95
 -10   0   0   63.10    2.97
 -10   0   0   60.37    3.20
 -10   0   0   66.99    3.12
 -10   0   0   59.83    3.19
 -10   0   0   60.64    2.94
  10   0   0   57.77    3.28
  10   0   0   63.49    3.05
  10   0   0   53.03    3.07
  10   0   0   51.77    3.24
  10   0   0   56.84    3.15
  10   0   0   58.42    3.20
  10   0   0   58.72    3.14
  10   0   0   59.06    3.02
  10   0   0   59.26    3.01
  10   0   0   55.70    3.24
  10   0   0   63.02    3.22
  10   0   0   60.06    3.01
  10   0   0   58.03    3.06
 -11   0   0   92.95    4.41
 -11   0   0   93.10    5.06
 -11   0   0   87.24    4.33
 -11   0   0   88.40    4.29
 -11   0   0   89.50    4.30
 -11   0   0   87.36    4.55
 -11   0   0   86.28    4.58
 -11   0   0   91.31    4.39
 -11   0   0   84.90    4.56
 -11   0   0   85.35    5.42
 -11   0   0   88.07    4.30
 -11   0   0   89.18    5.13
 -11   0   0  101.16    4.38
 -11   0   0   88.78    4.32
 -11   0   0   90.52    4.31
 -11   0   0   95.11    4.33
  11   0   0   86.86    4.38
  11   0   0   76.60    4.65
  11   0   0   87.12    4.53
  11   0   0   87.54    4.55
  11   0   0   77.33    4.45
  11   0   0   90.31    4.45
  11   0   0   81.45    4.58
  11   0   0   90.03    4.67
  11   0   0   88.40    4.42
  11   0   0   91.67    4.62
  11   0   0   88.87    4.71
  11   0   0   87.47    4.40
 -12   0   0  136.92    6.32
 -12   0   0  136.89    7.06
 -12   0   0  139.73    6.23
 -12   0   0  128.13    6.20
 -12   0   0  127.36    6.19
 -12   0   0  129.50    6.18
 -12   0   0  129.74    6.53
 -12   0   0  144.00    6.41
 -12   0   0  127.03    6.22
 -12   0   0  130.38    6.22
 -12   0   0  110.48    7.35
 -12   0   0  144.14    6.31
 -12   0   0  126.91    6.20
 -12   0   0  119.10    6.48
 -12   0   0  133.63    6.49
 -12   0   0  130.41    7.16
  12   0   0  125.42    6.33
  12   0   0  117.53    6.51
  12   0   0  121.93    6.58
  12   0   0  123.51    6.47
  12   0   0  127.84    6.31
  12   0   0  128.30    6.30
  12   0   0  130.75    6.68
  12   0   0  129.95    6.36
  12   0   0  108.13    6.59
  12   0   0  128.12    6.46
  12   0   0  109.56    6.36
 -13   0   0    8.58    1.60
 -13   0   0    9.03    0.94
 -13   0   0    7.97    0.57
 -13   0   0    7.52    0.42
 -13   0   0    9.05    1.31
 -13   0   0    7.22    0.83
 -13   0   0    7.87    0.44
 -13   0   0    7.18    0.43
 -13   0   0    7.68    0.46
 -13   0   0    6.77    0.77
 -13   0   0    7.25    0.79
 -13   0   0    7.74    0.46
  13   0   0    8.18    0.75
  13   0   0    6.78    0.81
  13   0   0    8.15    0.83
  13   0   0    7.55    0.93
  13   0   0    7.28    0.62
  13   0   0    7.29    0.92
  13   0   0    6.48    0.55
  13   0   0    8.20    0.59
 -14   0   0   64.03    3.22
 -14   0   0   62.36    3.62
 -14   0   0   64.84    3.18
 -14   0   0   64.66    3.58
 -14   0   0   66.41    3.57
 -14   0   0   73.04    3.36
  14   0   0   66.00    3.43
  14   0   0   58.56    3.60
  14   0   0   66.74    3.37
  14   0   0   63.74    3.70
  14   0   0   65.09    3.36
  14   0   0   69.82    3.59
  14   0   0   67.41    3.59
 -15   0   0   18.20    1.04
 -15   0   0   17.46    1.27
 -15   0   0   15.96    1.27
 -15   0   0   16.31    0.86
 -15   0   0   17.19    1.34
  15   0   0   18.54    1.43
  15   0   0   16.30    1.05
  15   0   0   15.63    1.31
  15   0   0   17.78    1.14
  15   0   0   18.16    1.29
  15   0   0   18.19    1.08
 -16   0   0    0.72    0.42
 -16   0   0    0.50    0.25
 -16   0   0    0.74    0.44
 -16   0   0   -0.07    0.35
  16   0   0    0.73    0.30
  16   0   0    0.09    0.44
  16   0   0    0.45    0.39
  16   0   0    1.15    0.49
  16   0   0    0.27    0.24
  16   0   0    0.09    0.26
 -17   0   0    3.46    0.68
 -17   0   0    5.23    0.80
 -17   0   0    4.84    0.83
 -17   0   0    4.56    0.49
  17   0   0    4.83    0.56
  17   0   0    5.30    0.90
  17   0   0    4.71    0.56
  17   0   0    5.93    0.67
  17   0   0    3.76    0.71
 -18   0   0    1.42    0.54
 -18   0   0    1.72    0.33
 -18   0   0    1.15    0.52
 -18   0   0    0.95    0.55
  18   0   0    1.62    0.40
  18   0   0    2.70    0.47
  18   0   0    1.74    0.39
  18   0   0    2.18    0.60
  18   1   0    9.46    0.80
  18   1   0   10.96    0.89
  18   1   0   10.50    1.16
  18   1   0    8.06    0.77
 -18  -1   0   10.29    1.14
 -18  -1   0    9.21    1.08
 -18  -1   0    9.37    1.19
 -18  -1   0   10.45    0.73
  17   1   0    1.73    0.56
  17   1   0    2.03    0.39
  17   1   0    2.46    0.45
  17   1   0    1.47    0.37
  17   1   0    3.05    0.74
 -17  -1   0    2.62    0.64
 -17  -1   0    2.72    0.60
 -17  -1   0    1.98    0.36
 -17  -1   0    1.41    0.50
  16   1   0   15.72    1.05
  16   1   0   16.67    1.44
  16   1   0   18.45    1.15
  16   1   0   12.53    1.36
  16   1   0   15.66    1.05
  16   1   0   16.64    1.29
 -16  -1   0   16.96    1.02
 -16  -1   0   15.20    1.25
 -16  -1   0   17.75    1.31
 -16  -1   0   15.74    1.32
  15   1   0   27.63    1.75
  15   1   0   25.92    1.51
  15   1   0   24.67    1.76
  15   1   0   26.92    1.58
  15   1   0   27.29    1.89
  15   1   0   26.53    1.51
 -15  -1   0   26.44    1.73
 -15  -1   0   26.96    1.34
 -15  -1   0   24.16    1.28
 -15  -1   0   29.50    1.51
 -15  -1   0   24.07    1.74
 -15  -1   0   29.47    1.77
  14   1   0    8.71    0.67
  14   1   0    7.71    0.82
  14   1   0    6.25    0.83
  14   1   0    7.53    0.59
  14   1   0    6.93    0.90
  14   1   0    7.64    0.59
  14   1   0    5.81    0.77
 -14  -1   0    7.42    0.84
 -14  -1   0    7.71    0.42
 -14  -1   0    7.43    0.42
 -14  -1   0    7.39    0.44
 -14  -1   0    6.84    1.15
 -14  -1   0    7.16    0.46
 -14  -1   0    6.28    0.82
 -14  -1   0    7.53    0.58
 -14  -1   0    6.10    0.79
  13   1   0   31.93    2.11
  13   1   0   32.73    1.92
  13   1   0   34.74    1.76
  13   1   0   31.79    1.87
  13   1   0   32.86    1.81
  13   1   0   32.76    2.08
  13   1   0   33.58    1.95
  13   1   0   30.35    1.97
  13   1   0   30.00    1.73
 -13  -1   0   35.12    1.77
 -13  -1   0   32.22    1.61
 -13  -1   0   32.10    1.62
 -13  -1   0   32.10    1.64
 -13  -1   0   34.21    2.56
 -13  -1   0   29.76    1.92
 -13  -1   0   33.86    2.47
 -13  -1   0   28.09    2.75
 -13  -1   0   31.19    1.93
 -13  -1   0   32.23    1.60
 -13  -1   0   31.54    1.65
 -13  -1   0   31.71    1.96
  12   1   0    0.58    0.37
  12   1   0   -0.24    0.25
  12   1   0    0.16    0.19
  12   1   0    0.25    0.29
  12   1   0    0.22    0.29
  12   1   0   -0.07    0.14
  12   1   0   -0.06    0.15
  12   1   0    0.18    0.18
  12   1   0    0.22    0.28
  12   1   0    0.23    0.18
  12   1   0   -0.02    0.23
 -12  -1   0    0.10    0.08
 -12  -1   0    0.19    0.12
 -12  -1   0    0.05    0.39
 -12  -1   0    0.15    0.12
 -12  -1   0    0.08    0.09
 -12  -1   0    0.16    0.11
 -12  -1   0   -0.02    0.35
 -12  -1   0    0.15    0.09
 -12  -1   0    0.06    0.11
 -12  -1   0    0.01    0.25
 -12  -1   0    0.07    0.08
 -12  -1   0   -0.23    0.46
 -12  -1   0   -0.06    0.24
 -12  -1   0    0.30    0.27
 -12  -1   0    0.05    0.17
 -12  -1   0    0.20    0.18
  11   1   0   71.66    3.55
  11   1   0   70.61    3.54
  11   1   0   68.15    3.68
  11   1   0   65.43    3.69
  11   1   0   70.14    3.86
  11   1   0   78.70    3.80
  11   1   0   69.85    3.60
  11   1   0   58.32    3.80
  11   1   0   70.70    3.58
  11   1   0   66.49    3.81
  11   1   0   66.98    3.74
  11   1   0   57.78    3.59
 -11  -1   0   68.47    3.72
 -11  -1   0   73.62    3.41
 -11  -1   0   71.94    3.45
 -11  -1   0   69.08    3.72
 -11  -1   0   72.77    3.46
 -11  -1   0   70.17    3.54
 -11  -1   0   70.49    3.50
 -11  -1   0   75.16    3.66
 -11  -1   0   61.61    4.47
 -11  -1   0   71.31    3.47
 -11  -1   0   68.55    3.72
 -11  -1   0   71.70    3.57
 -11  -1   0   77.02    3.49
 -11  -1   0   78.01    3.43
 -11  -1   0   68.75    3.45
 -11  -1   0   73.12    4.28
 -11  -1   0   74.10    3.50
 -11  -1   0   77.71    3.53
 -11  -1   0   71.80    4.19
  10   1   0   24.74    1.69
  10   1   0   25.08    1.64
  10   1   0   24.54    1.71
  10   1   0   28.08    1.50
  10   1   0   23.03    1.52
  10   1   0   27.26    1.47
  10   1   0   28.70    1.67
  10   1   0   29.20    1.53
  10   1   0   30.89    2.23
  10   1   0   25.35    1.60
  10   1   0   27.32    1.46
  10   1   0   27.89    1.48
  10   1   0   27.01    1.59
  10   1   0   26.55    1.73
 -10  -1   0   27.64    1.42
 -10  -1   0   29.12    1.49
 -10  -1   0   28.92    1.66
 -10  -1   0   31.72    1.60
 -10  -1   0   30.48    1.44
 -10  -1   0   28.11    1.41
 -10  -1   0   28.77    1.65
 -10  -1   0   24.75    2.24
 -10  -1   0   30.13    1.47
 -10  -1   0   28.18    1.64
 -10  -1   0   28.91    1.37
 -10  -1   0   28.40    2.00
 -10  -1   0   27.26    1.51
 -10  -1   0   27.72    1.40
 -10  -1   0   26.72    1.44
 -10  -1   0   29.40    2.08
 -10  -1   0   26.63    1.39
 -10  -1   0   26.72    1.62
 -10  -1   0   27.81    1.40
 -10  -1   0   29.49    1.44
   9   1   0    6.69    0.52
   9   1   0    7.90    0.48
   9   1   0    6.95    0.50
   9   1   0    7.55    0.69
   9   1   0    7.18    0.48
   9   1   0    6.56    0.76
   9   1   0    7.47    0.64
   9   1   0    6.40    0.66
   9   1   0    8.04    0.66
   9   1   0    8.01    0.59
   9   1   0    7.00    0.74
   9   1   0    6.85    0.59
   9   1   0    6.68    0.49
   9   1   0    7.87    1.13
   9   1   0    6.23    0.52
  -9  -1   0    7.29    0.53
  -9  -1   0    7.34    0.46
  -9  -1   0    8.12    0.58
  -9  -1   0    7.51    0.40
  -9  -1   0    7.74    0.44
  -9  -1   0    7.00    0.42
  -9  -1   0    8.24    0.43
  -9  -1   0    7.21    0.62
  -9  -1   0    7.72    0.43
  -9  -1   0    6.32    0.60
  -9  -1   0    7.63    0.47
  -9  -1   0    7.78    0.46
  -9  -1   0    7.65    0.43
  -9  -1   0    6.99    0.94
  -9  -1   0    7.76    0.50
  -9  -1   0    6.63    0.60
  -9  -1   0    8.40    0.49
  -9  -1   0    7.82    0.61
  -9  -1   0    8.38    0.92
  -9  -1   0    6.60    1.12
  -9  -1   0    7.69    0.46
  -9  -1   0    7.59    0.53
   8   1   0   36.86    2.33
   8   1   0   34.46    1.84
   8   1   0   32.51    1.69
   8   1   0   29.45    1.85
   8   1   0   32.49    1.77
   8   1   0   31.33    1.71
   8   1   0   30.32    1.80
   8   1   0   32.27    1.67
   8   1   0   30.03    1.99
   8   1   0   32.49    1.68
   8   1   0   33.49    1.70
   8   1   0   31.12    1.87
   8   1   0   33.12    1.66
   8   1   0   30.87    1.77
   8   1   0   28.12    1.84
   8   1   0   27.83    1.71
  -8  -1   0   34.58    2.11
  -8  -1   0   34.03    1.63
  -8  -1   0   32.55    1.64
  -8  -1   0   31.64    1.61
  -8  -1   0   35.68    1.83
  -8  -1   0   32.86    1.65
  -8  -1   0   34.83    2.18
  -8  -1   0   34.46    1.66
  -8  -1   0   35.18    1.68
  -8  -1   0   33.94    1.73
  -8  -1   0   34.99    1.66
  -8  -1   0   31.44    1.62
  -8  -1   0   33.88    1.81
  -8  -1   0   31.83    1.62
  -8  -1   0   31.38    1.80
  -8  -1   0   32.78    1.69
  -8  -1   0   32.47    1.66
  -8  -1   0   32.94    1.60
  -8  -1   0   30.30    1.81
  -8  -1   0   36.06    1.79
  -8  -1   0   33.58    1.72
  -8  -1   0   34.40    1.80
  -8  -1   0   30.91    2.33
   7   1   0    1.88    0.21
   7   1   0    2.26    0.23
   7   1   0    2.64    0.47
   7   1   0    2.17    0.34
   7   1   0    2.93    0.36
   7   1   0    2.41    0.22
   7   1   0    2.18    0.35
   7   1   0    1.97    0.27
   7   1   0    1.86    0.24
   7   1   0    1.87    0.35
   7   1   0    2.06    0.20
   7   1   0    2.65    0.61
   7   1   0    2.28    0.34
   7   1   0    1.94    0.29
   7   1   0    2.21    0.24
   7   1   0    1.90    0.24
   7   1   0    2.02    0.22
  -7  -1   0    1.92    0.45
  -7  -1   0    2.22    0.47
  -7  -1   0    2.17    0.19
  -7  -1   0    1.68    0.54
  -7  -1   0    2.53    0.21
  -7  -1   0    2.43    0.19
  -7  -1   0    2.32    0.30
  -7  -1   0    2.08    0.28
  -7  -1   0    2.20    0.26
  -7  -1   0    2.23    0.17
  -7  -1   0    1.78    0.29
  -7  -1   0    1.72    0.16
  -7  -1   0    1.88    0.15
  -7  -1   0    1.89    0.24
  -7  -1   0    2.20    0.14
  -7  -1   0    1.75    0.19
  -7  -1   0    2.01    0.16
  -7  -1   0    2.21    0.19
  -7  -1   0    2.00    0.31
  -7  -1   0    1.50    0.28
  -7  -1   0    1.82    0.21
  -7  -1   0    2.56    0.35
  -7  -1   0    2.00    0.18
   6   1   0   76.94    4.03
   6   1   0   82.08    3.88
   6   1   0   80.02    3.88
   6   1   0   73.09    3.91
   6   1   0   84.01    4.01
   6   1   0   82.09    3.89
   6   1   0   71.57    4.02
   6   1   0   76.83    3.94
   6   1   0   78.33    3.99
   6   1   0   77.84    4.16
   6   1   0   79.02    3.87
   6   1   0   82.19    3.90
   6   1   0   78.76    3.96
   6   1   0   83.46    3.89
   6   1   0   76.59    4.03
   6   1   0   80.55    3.91
   6   1   0   81.19    4.39
  -6  -1   0   83.50    3.96
  -6  -1   0   76.87    3.92
  -6  -1   0   84.49    4.30
  -6  -1   0   78.88    3.89
  -6  -1   0   79.02    3.90
  -6  -1   0   75.90    3.85
  -6  -1   0   73.87    3.97
  -6  -1   0   84.37    3.88
  -6  -1   0   81.98    3.99
  -6  -1   0   70.41    4.38
  -6  -1   0   77.17    3.84
  -6  -1   0   87.80    4.01
  -6  -1   0   77.43    4.00
  -6  -1   0   75.40    3.92
  -6  -1   0   84.27    3.86
  -6  -1   0   78.41    4.21
  -6  -1   0   85.33    3.88
  -6  -1   0   83.11    3.98
  -6  -1   0   77.10    3.85
  -6  -1   0   79.42    3.86
  -6  -1   0   74.23    3.87
   5   1   0   27.61    1.31
   5   1   0   28.50    1.68
   5   1   0   24.91    1.42
   5   1   0   26.01    1.31
   5   1   0   26.46    1.31
   5   1   0   25.84    1.29
   5   1   0   26.70    1.29
   5   1   0   26.04    1.32
   5   1   0   23.24    1.38
   5   1   0   24.71    1.36
   5   1   0   26.19    1.71
   5   1   0   24.66    1.51
   5   1   0   25.95    1.30
   5   1   0   25.70    1.42
   5   1   0   27.00    1.40
   5   1   0   22.61    1.32
   5   1   0   26.23    1.43
   5   1   0   24.85    1.35
  -5  -1   0   25.93    1.31
  -5  -1   0   25.63    1.30
  -5  -1   0   26.94    1.40
  -5  -1   0   25.69    1.28
  -5  -1   0   25.31    1.36
  -5  -1   0   24.80    1.31
  -5  -1   0   26.81    1.29
  -5  -1   0   25.57    1.38
  -5  -1   0   25.12    1.27
  -5  -1   0   26.58    1.61
  -5  -1   0   25.92    1.29
  -5  -1   0   25.32    1.33
  -5  -1   0   25.39    1.39
  -5  -1   0   25.56    1.28
  -5  -1   0   26.79    1.39
  -5  -1   0   25.46    1.43
  -5  -1   0   26.86    1.28
  -5  -1   0   26.01    1.56
  -5  -1   0   21.52    1.67
  -5  -1   0   25.72    1.36
  -5  -1   0   25.88    1.40
  -5  -1   0   23.48    1.33
   4   1   0    0.46    0.19
   4   1   0    0.16    0.12
   4   1   0    0.23    0.07
   4   1   0    0.25    0.11
   4   1   0    0.17    0.14
   4   1   0    0.44    0.09
   4   1   0    0.49    0.11
   4   1   0    0.28    0.07
   4   1   0    0.21    0.12
   4   1   0    0.19    0.13
   4   1   0    0.16    0.11
   4   1   0    0.26    0.06
   4   1   0    0.37    0.09
   4   1   0    0.23    0.07
   4   1   0    0.56    0.29
   4   1   0    0.35    0.07
   4   1   0    0.24    0.17
   4   1   0    0.30    0.11
  -4  -1   0    0.27    0.07
  -4  -1   0    0.47    0.20
  -4  -1   0    0.19    0.05
  -4  -1   0    0.58    0.14
  -4  -1   0    0.28    0.06
  -4  -1   0    0.26    0.10
  -4  -1   0    0.30    0.13
  -4  -1   0    0.56    0.12
  -4  -1   0    0.72    0.12
  -4  -1   0    0.28    0.07
  -4  -1   0    0.22    0.14
  -4  -1   0    0.39    0.27
  -4  -1   0    0.41    0.12
  -4  -1   0    0.21    0.06
  -4  -1   0    0.25    0.13
  -4  -1   0    0.55    0.07
  -4  -1   0    0.30    0.08
  -4  -1   0    0.09    0.17
  -4  -1   0    0.21    0.13
  -4  -1   0    0.44    0.08
  -4  -1   0    0.24    0.06
   3   1   0  104.63    5.15
   3   1   0  113.52    5.33
   3   1   0  104.76    5.16
   3   1   0  106.12    5.08
   3   1   0  101.51    5.12
   3   1   0  102.15    5.11
   3   1   0  108.19    5.08
   3   1   0  104.82    5.22
   3   1   0  100.58    5.35
   3   1   0  106.59    5.08
   3   1   0   88.27    5.08
   3   1   0  105.56    5.07
   3   1   0  109.54    5.06
   3   1   0  104.29    5.13
   3   1   0  111.10    5.14
   3   1   0   98.39    5.10
   3   1   0  105.19    5.07
   3   1   0  108.57    5.08
   3   1   0  106.90    5.07
   3   1   0  107.68    5.14
  -3  -1   0  101.68    5.15
  -3  -1   0   99.64    5.36
  -3  -1   0  111.20    5.14
  -3  -1   0   94.49    5.10
  -3  -1   0  109.47    5.13
  -3  -1   0   98.63    5.08
  -3  -1   0   96.80    5.08
  -3  -1   0  101.25    5.10
  -3  -1   0  105.80    5.06
  -3  -1   0  102.68    5.14
  -3  -1   0  102.14    5.13
  -3  -1   0   99.26    5.06
  -3  -1   0  117.52    5.07
  -3  -1   0  110.46    5.30
  -3  -1   0  108.04    5.11
  -3  -1   0  114.39    5.08
  -3  -1   0  106.61    5.12
  -3  -1   0  112.43    5.14
  -3  -1   0  102.57    5.14
  -3  -1   0  116.78    5.11
  -3  -1   0  101.92    5.07
  -3  -1   0  101.37    5.23
   2   1   0  103.66    4.86
   2   1   0   99.43    4.75
   2   1   0  102.95    4.93
   2   1   0   96.54    4.79
   2   1   0   99.76    4.79
   2   1   0   83.01    4.76
   2   1   0   94.11    4.78
   2   1   0  101.21    4.81
   2   1   0   92.40    4.78
   2   1   0   95.89    4.95
   2   1   0  100.71    4.79
   2   1   0   94.97    4.74
   2   1   0  101.85    4.79
   2   1   0   96.76    4.81
   2   1   0   98.64    4.75
   2   1   0  103.28    4.76
   2   1   0   97.78    4.75
   2   1   0   88.07    4.77
   2   1   0  104.99    4.80
   2   1   0   94.54    4.75
  -2  -1   0   91.09    4.76
  -2  -1   0  102.12    4.82
  -2  -1   0   92.74    4.75
  -2  -1   0  105.28    4.75
  -2  -1   0   92.15    4.78
  -2  -1   0  112.11    4.80
  -2  -1   0   95.10    4.77
  -2  -1   0  105.18    4.79
  -2  -1   0   99.24    4.87
  -2  -1   0   96.42    4.79
  -2  -1   0  102.29    4.81
  -2  -1   0   96.26    4.80
  -2  -1   0  102.72    4.91
  -2  -1   0  102.55    4.78
  -2  -1   0   96.25    4.79
  -2  -1   0  107.90    4.77
  -2  -1   0   96.14    4.76
  -2  -1   0  106.01    4.75
  -2  -1   0   93.13    4.80
  -2  -1   0   95.00    4.77
  -2  -1   0  104.12    4.83
   1   1   0  142.98    6.99
   1   1   0  142.43    6.93
   1   1   0  146.08    7.03
   1   1   0  144.21    6.92
   1   1   0  157.65    6.96
   1   1   0  143.19    7.10
   1   1   0  136.46    6.94
   1   1   0  137.84    6.96
   1   1   0  138.68    6.91
   1   1   0  152.04    7.00
   1   1   0  144.86    7.02
  -1  -1   0  136.76    6.96
  -1  -1   0  149.71    6.97
  -1  -1   0  128.78    6.91
  -1  -1   0  142.50    7.00
  -1  -1   0  147.66    6.97
  -1  -1   0  149.78    6.96
  -1  -1   0  123.97    7.40
  -1  -1   0  140.44    6.95
  -1  -1   0  146.52    6.98
  -1  -1   0  142.81    7.18
  -1  -1   0  150.46    6.94
  -1  -1   0  143.28    6.98
  -1  -1   0  135.61    6.93
  -1  -1   0  144.10    6.99
  -1  -1   0  156.56    7.00
  -1  -1   0  151.95    7.02
   0   1   0   -0.01    0.01
   0   1   0   -0.01    0.00
   0   1   0   -0.01    0.01
   0   1   0    0.04    0.01
   0   1   0    0.06    0.04
   0   1   0    0.00    0.01
   0   1   0    0.00    0.02
   0   1   0    0.00    0.00
   0   1   0    0.00    0.00
   0   1   0    0.06    0.03
   0   1   0    0.00    0.00
   0   1   0    0.02    0.02
   0   1   0    0.00    0.01
   0   1   0    0.00    0.01
   0   1   0    0.02    0.02
   0   1   0    0.00    0.01
   0   1   0    0.05    0.02
   0  -1   0    0.01    0.01
   0  -1   0    0.00    0.01
   0  -1   0   -0.01    0.02
   0  -1   0    0.01    0.01
   0  -1   0    0.05    0.01
   0  -1   0    0.00    0.02
   0  -1   0    0.03    0.02
   0  -1   0    0.00    0.01
   0  -1   0    0.08    0.03
   0  -1   0    0.01    0.01
   0  -1   0    0.00    0.01
   0  -1   0    0.00    0.02
   0  -1   0    0.01    0.01
   0  -1   0    0.00    0.01
   0  -1   0    0.00    0.01
   0  -1   0    0.05    0.01
  -1   1   0  153.03    7.47
  -1   1   0  150.84    7.40
  -1   1   0  156.77    7.50
  -1   1   0  166.61    7.47
  -1   1   0  141.70    7.38
  -1   1   0  145.74    7.54
  -1   1   0  155.75    7.45
  -1   1   0  156.44    7.54
  -1   1   0  140.58    7.38
   1  -1   0  159.92    7.47
   1  -1   0  152.57    7.45
   1  -1   0  160.11    7.42
   1  -1   0  156.38    7.43
   1  -1   0  147.37    7.41
   1  -1   0  165.23    7.40
   1  -1   0  151.94    7.41
   1  -1   0  135.85    7.43
   1  -1   0  148.94    7.42
   1  -1   0  160.92    7.59
   1  -1   0  160.36    7.45
   1  -1   0  158.62    7.61
   1  -1   0  156.33    7.44
   1  -1   0  149.66    7.45
   1  -1   0  155.33    7.43
   1  -1   0  152.27    7.41
  -2   1   0  100.42    5.01
  -2   1   0  106.01    5.00
  -2   1   0  106.41    5.03
  -2   1   0   97.26    5.01
  -2   1   0   99.22    5.00
  -2   1   0   96.36    4.99
  -2   1   0  102.93    4.99
  -2   1   0   97.90    4.98
  -2   1   0  102.48    5.02
  -2   1   0  107.12    5.05
  -2   1   0   98.64    4.98
  -2   1   0  113.20    5.08
  -2   1   0  101.51    5.07
  -2   1   0  109.67    5.06
  -2   1   0  108.97    5.05
  -2   1   0  103.47    5.00
  -2   1   0  106.14    5.00
  -2   1   0  106.66    4.99
  -2   1   0   98.81    5.01
   2  -1   0  107.54    5.02
   2  -1   0   97.82    4.96
   2  -1   0  106.24    5.05
   2  -1   0  106.74    5.07
   2  -1   0  104.21    5.02
   2  -1   0  105.74    5.33
   2  -1   0   99.90    5.01
   2  -1   0   96.72    5.06
   2  -1   0  101.19    4.99
   2  -1   0   97.45    4.99
   2  -1   0  105.74    4.98
   2  -1   0  100.04    5.01
   2  -1   0  105.48    4.98
   2  -1   0  101.42    5.00
   2  -1   0  102.19    5.01
   2  -1   0  104.09    5.00
   2  -1   0  101.88    4.99
   2  -1   0  100.39    5.01
   2  -1   0  103.97    5.02
   2  -1   0  106.22    5.04
   2  -1   0  119.38    5.02
   2  -1   0  106.09    4.98
   2  -1   0  104.96    5.00
   2  -1   0   96.90    5.00
  -3   1   0  111.60    5.41
  -3   1   0  109.50    5.36
  -3   1   0  116.65    5.30
  -3   1   0  115.35    5.57
  -3   1   0  108.14    5.31
  -3   1   0  121.71    5.38
  -3   1   0  118.46    5.39
  -3   1   0  107.87    5.35
  -3   1   0  100.78    5.34
  -3   1   0  111.85    5.47
  -3   1   0  114.24    5.38
  -3   1   0  107.61    5.33
  -3   1   0  106.90    5.35
  -3   1   0  116.39    5.37
  -3   1   0  100.52    5.37
  -3   1   0  110.99    5.36
  -3   1   0  102.33    5.32
  -3   1   0  117.13    5.41
  -3   1   0  112.58    5.54
  -3   1   0  108.25    5.39
  -3   1   0  111.33    5.35
  -3   1   0  115.03    5.37
  -3   1   0  108.75    5.37
   3  -1   0  112.08    5.36
   3  -1   0  105.97    5.39
   3  -1   0  108.75    5.36
   3  -1   0  108.22    5.39
   3  -1   0  111.14    5.32
   3  -1   0  120.65    5.56
   3  -1   0  109.20    5.33
   3  -1   0  119.24    5.38
   3  -1   0  109.30    5.38
   3  -1   0  106.08    5.31
   3  -1   0  110.14    5.34
   3  -1   0  109.30    5.36
   3  -1   0  109.33    5.33
   3  -1   0  104.12    5.34
   3  -1   0  104.35    5.31
   3  -1   0  116.47    5.31
   3  -1   0  114.45    5.34
   3  -1   0  103.69    5.45
   3  -1   0  107.93    5.31
   3  -1   0  113.31    5.34
   3  -1   0  106.87    5.38
   3  -1   0  104.88    5.35
   3  -1   0  112.28    5.37
   3  -1   0  105.97    5.35
  -4   1   0    0.28    0.08
  -4   1   0    0.39    0.05
  -4   1   0    0.23    0.04
  -4   1   0    0.19    0.04
  -4   1   0    0.24    0.08
  -4   1   0    0.39    0.11
  -4   1   0    0.26    0.17
  -4   1   0    0.24    0.06
  -4   1   0    0.41    0.25
  -4   1   0    0.28    0.13
  -4   1   0    0.54    0.13
  -4   1   0    0.29    0.04
  -4   1   0    0.41    0.12
  -4   1   0    0.31    0.11
  -4   1   0    0.24    0.05
  -4   1   0    0.26    0.04
  -4   1   0    0.23    0.06
  -4   1   0    0.45    0.08
  -4   1   0    0.53    0.12
  -4   1   0    0.27    0.05
   4  -1   0    0.34    0.07
   4  -1   0    0.44    0.13
   4  -1   0    0.22    0.06
   4  -1   0    0.22    0.07
   4  -1   0    0.30    0.06
   4  -1   0    0.28    0.11
   4  -1   0    0.29    0.16
   4  -1   0    0.26    0.09
   4  -1   0    0.34    0.06
   4  -1   0    0.48    0.15
   4  -1   0    0.62    0.25
   4  -1   0    0.32    0.07
   4  -1   0    0.26    0.06
   4  -1   0    0.39    0.10
   4  -1   0    0.23    0.05
   4  -1   0    0.40    0.17
   4  -1   0    0.36    0.10
   4  -1   0    0.38    0.12
   4  -1   0    0.26    0.12
  -5   1   0   25.31    1.40
  -5   1   0   31.35    1.38
  -5   1   0   28.04    1.31
  -5   1   0   25.99    1.29
  -5   1   0   27.74    1.31
  -5   1   0   25.23    1.44
  -5   1   0   25.38    1.30
  -5   1   0   23.89    1.38
  -5   1   0   26.37    1.30
  -5   1   0   24.31    1.70
  -5   1   0   26.11    1.29
  -5   1   0   27.76    1.40
  -5   1   0   26.63    1.28
  -5   1   0   26.76    1.32
  -5   1   0   25.83    1.56
  -5   1   0   25.23    1.35
  -5   1   0   24.84    1.41
  -5   1   0   26.75    1.30
  -5   1   0   26.65    1.64
  -5   1   0   27.47    1.29
  -5   1   0   25.01    1.31
  -5   1   0   28.42    1.34
  -5   1   0   25.06    1.37
   5  -1   0   24.14    1.38
   5  -1   0   26.92    1.41
   5  -1   0   27.05    1.34
   5  -1   0   26.48    1.41
   5  -1   0   28.82    1.68
   5  -1   0   25.61    1.32
   5  -1   0   25.56    1.44
   5  -1   0   25.30    1.43
   5  -1   0   27.01    1.37
   5  -1   0   26.58    1.31
   5  -1   0   24.42    1.37
   5  -1   0   31.33    1.71
   5  -1   0   26.74    1.32
   5  -1   0   25.95    1.34
   5  -1   0   23.69    1.32
   5  -1   0   26.14    1.55
   5  -1   0   27.52    1.41
   5  -1   0   26.43    1.31
   5  -1   0   25.89    1.34
   5  -1   0   26.52    1.32
  -6   1   0   83.12    3.93
  -6   1   0   84.45    3.92
  -6   1   0   81.91    4.38
  -6   1   0   75.68    4.04
  -6   1   0   86.97    3.96
  -6   1   0   80.68    3.94
  -6   1   0   87.41    4.07
  -6   1   0   85.97    3.99
  -6   1   0   72.23    4.44
  -6   1   0   84.74    3.96
  -6   1   0   80.31    3.96
  -6   1   0   78.84    3.93
  -6   1   0   75.63    3.98
  -6   1   0   80.65    3.93
  -6   1   0   86.32    3.93
  -6   1   0   82.48    4.28
  -6   1   0   78.67    4.08
  -6   1   0   78.06    4.03
  -6   1   0   79.08    4.01
  -6   1   0   80.70    4.07
  -6   1   0   92.76    4.04
  -6   1   0   82.30    3.94
  -6   1   0   84.21    3.96
  -6   1   0   77.31    4.11
   6  -1   0   78.91    3.99
   6  -1   0   80.72    4.05
   6  -1   0   81.18    3.97
   6  -1   0   84.44    4.03
   6  -1   0   76.63    4.07
   6  -1   0   82.33    3.96
   6  -1   0   78.43    4.08
   6  -1   0   78.32    4.24
   6  -1   0   79.51    4.03
   6  -1   0   81.95    3.96
   6  -1   0   82.86    3.96
   6  -1   0   81.83    4.13
   6  -1   0   79.04    3.97
   6  -1   0   82.11    3.99
   6  -1   0   83.69    4.08
   6  -1   0   78.10    4.10
   6  -1   0   81.34    3.99
  -7   1   0    1.48    0.19
  -7   1   0    2.20    0.15
  -7   1   0    2.25    0.32
  -7   1   0    1.93    0.15
  -7   1   0    1.94    0.16
  -7   1   0    2.09    0.48
  -7   1   0    2.43    0.24
  -7   1   0    1.97    0.18
  -7   1   0    2.23    0.29
  -7   1   0    2.49    0.21
  -7   1   0    2.18    0.13
  -7   1   0    2.00    0.15
  -7   1   0    2.08    0.24
  -7   1   0    1.99    0.18
  -7   1   0    1.93    0.54
  -7   1   0    1.89    0.42
  -7   1   0    2.33    0.31
  -7   1   0    2.00    0.16
  -7   1   0    1.85    0.29
  -7   1   0    2.01    0.14
  -7   1   0    2.12    0.15
  -7   1   0    2.32    0.18
   7  -1   0    2.30    0.29
   7  -1   0    1.87    0.19
   7  -1   0    1.78    0.29
   7  -1   0    2.15    0.20
   7  -1   0    2.33    0.24
   7  -1   0    2.25    0.24
   7  -1   0    1.90    0.30
   7  -1   0    2.44    0.35
   7  -1   0    1.99    0.25
   7  -1   0    3.21    0.59
   7  -1   0    1.81    0.26
   7  -1   0    1.51    0.37
   7  -1   0    2.22    0.19
   7  -1   0    2.11    0.35
   7  -1   0    2.42    0.33
   7  -1   0    2.14    0.21
   7  -1   0    2.24    0.20
   7  -1   0    2.03    0.22
  -8   1   0   32.44    1.64
  -8   1   0   34.83    1.61
  -8   1   0   32.77    2.18
  -8   1   0   32.75    1.63
  -8   1   0   29.02    2.28
  -8   1   0   31.89    1.79
  -8   1   0   34.88    2.10
  -8   1   0   34.38    1.61
  -8   1   0   32.55    1.70
  -8   1   0   32.48    1.66
  -8   1   0   30.47    1.82
  -8   1   0   38.63    1.84
  -8   1   0   32.61    1.63
  -8   1   0   38.23    1.77
  -8   1   0   35.26    1.66
  -8   1   0   31.13    1.81
  -8   1   0   34.81    1.68
  -8   1   0   35.10    1.84
  -8   1   0   31.93    1.65
  -8   1   0   34.29    1.70
  -8   1   0   30.13    1.72
  -8   1   0   31.81    1.63
   8  -1   0   33.64    1.68
   8  -1   0   31.39    1.70
   8  -1   0   32.53    1.72
   8  -1   0   30.93    1.77
   8  -1   0   31.81    2.02
   8  -1   0   36.14    1.78
   8  -1   0   35.48    1.77
   8  -1   0   32.75    1.87
   8  -1   0   34.56    1.91
   8  -1   0   30.49    1.84
   8  -1   0   30.75    1.82
   8  -1   0   34.39    1.70
   8  -1   0   31.47    1.79
   8  -1   0   30.78    1.82
   8  -1   0   41.34    2.32
   8  -1   0   32.79    1.68
   8  -1   0   30.94    1.72
  -9   1   0    7.41    0.61
  -9   1   0    7.42    0.95
  -9   1   0    6.95    0.61
  -9   1   0    7.57    1.18
  -9   1   0    7.76    0.42
  -9   1   0    7.77    0.92
  -9   1   0    8.22    0.46
  -9   1   0    8.52    0.47
  -9   1   0    8.21    0.64
  -9   1   0    7.14    0.59
  -9   1   0    7.64    0.50
  -9   1   0    7.29    0.42
  -9   1   0    7.16    0.45
  -9   1   0    7.25    0.43
  -9   1   0    7.64    0.49
  -9   1   0    8.34    0.62
  -9   1   0    8.12    0.53
  -9   1   0    8.37    0.55
  -9   1   0    7.49    0.42
   9  -1   0    7.28    0.67
   9  -1   0    7.15    0.58
   9  -1   0    7.74    0.49
   9  -1   0    7.17    0.53
   9  -1   0    7.82    0.53
   9  -1   0    9.02    1.00
   9  -1   0    7.50    0.63
   9  -1   0    7.71    0.64
   9  -1   0    8.50    0.70
   9  -1   0    6.92    0.65
   9  -1   0    7.76    0.48
   9  -1   0    7.45    0.50
   9  -1   0    7.42    0.59
 -10   1   0   26.30    1.38
 -10   1   0   26.61    1.62
 -10   1   0   28.89    1.98
 -10   1   0   27.20    1.64
 -10   1   0   28.69    1.64
 -10   1   0   29.12    1.48
 -10   1   0   26.52    1.59
 -10   1   0   32.66    1.56
 -10   1   0   24.41    2.20
 -10   1   0   29.21    1.41
 -10   1   0   27.71    1.38
 -10   1   0   26.74    1.39
 -10   1   0   26.23    2.03
 -10   1   0   26.82    1.46
 -10   1   0   31.87    1.45
 -10   1   0   28.26    1.42
 -10   1   0   28.49    1.39
 -10   1   0   29.72    1.39
  10  -1   0   28.51    1.74
  10  -1   0   27.52    1.46
  10  -1   0   26.30    1.64
  10  -1   0   28.68    1.49
  10  -1   0   25.21    1.51
  10  -1   0   27.83    1.52
  10  -1   0   28.25    1.69
  10  -1   0   26.71    1.47
  10  -1   0   24.71    1.57
  10  -1   0   26.34    1.69
  10  -1   0   28.33    1.65
  10  -1   0   26.75    1.60
 -11   1   0   71.90    4.13
 -11   1   0   74.75    3.43
 -11   1   0   68.21    3.70
 -11   1   0   70.37    3.73
 -11   1   0   70.42    3.42
 -11   1   0   68.86    3.52
 -11   1   0   74.11    3.44
 -11   1   0   63.26    4.46
 -11   1   0   70.93    3.43
 -11   1   0   75.34    3.53
 -11   1   0   79.69    3.61
 -11   1   0   68.56    3.66
 -11   1   0   70.84    3.43
 -11   1   0   69.73    3.45
 -11   1   0   76.55    3.49
  11  -1   0   70.30    3.51
  11  -1   0   63.54    3.58
  11  -1   0   62.13    3.76
  11  -1   0   70.23    3.57
  11  -1   0   65.31    3.71
  11  -1   0   66.45    3.76
  11  -1   0   70.22    3.53
  11  -1   0   69.32    3.83
  11  -1   0   67.59    3.67
  11  -1   0   69.45    3.66
  11  -1   0   71.68    3.55
 -12   1   0    0.23    0.18
 -12   1   0    0.09    0.07
 -12   1   0    0.18    0.07
 -12   1   0    0.18    0.08
 -12   1   0    0.32    0.17
 -12   1   0    0.02    0.24
 -12   1   0    0.22    0.40
 -12   1   0    0.48    0.57
 -12   1   0    0.00    0.24
 -12   1   0    0.00    0.07
 -12   1   0    0.20    0.08
 -12   1   0   -0.06    0.08
 -12   1   0    0.11    0.25
  12  -1   0   -0.41    0.26
  12  -1   0    0.73    0.31
  12  -1   0   -0.13    0.14
  12  -1   0   -0.27    0.21
  12  -1   0   -0.19    0.20
  12  -1   0    0.30    0.19
  12  -1   0    0.11    0.16
  12  -1   0    0.13    0.17
  12  -1   0    0.38    0.19
  12  -1   0    0.07    0.26
 -13   1   0   31.01    1.92
 -13   1   0   30.26    1.88
 -13   1   0   32.76    1.99
 -13   1   0   33.78    1.72
 -13   1   0   29.83    1.55
 -13   1   0   29.32    2.76
 -13   1   0   31.94    1.60
 -13   1   0   32.64    1.57
 -13   1   0   33.52    2.42
 -13   1   0   31.86    1.59
 -13   1   0   33.31    1.56
  13  -1   0   32.91    1.73
  13  -1   0   31.16    1.97
  13  -1   0   32.07    1.79
  13  -1   0   30.49    1.90
  13  -1   0   29.89    2.00
  13  -1   0   33.62    1.92
  13  -1   0   33.92    1.74
 -14   1   0    7.56    0.55
 -14   1   0    7.20    0.39
 -14   1   0    6.97    0.86
 -14   1   0    7.25    0.83
 -14   1   0    6.67    0.38
 -14   1   0    8.35    1.34
 -14   1   0    6.29    0.74
  14  -1   0    7.83    0.65
  14  -1   0    6.25    0.82
  14  -1   0    7.27    0.56
  14  -1   0    6.92    0.57
  14  -1   0    7.03    0.78
  14  -1   0    7.70    0.93
  14  -1   0    6.86    0.80
 -15   1   0   28.65    1.86
 -15   1   0   27.86    1.49
 -15   1   0   25.74    1.75
 -15   1   0   29.29    1.75
  15  -1   0   26.28    1.53
  15  -1   0   28.80    1.89
  15  -1   0   26.16    1.75
  15  -1   0   23.73    1.77
  15  -1   0   26.65    1.59
  15  -1   0   26.74    1.53
 -16   1   0   17.75    0.98
 -16   1   0   13.36    1.19
 -16   1   0   14.56    1.31
 -16   1   0   15.48    1.24
  16  -1   0   15.03    1.08
  16  -1   0   15.02    1.02
  16  -1   0   16.23    1.03
  16  -1   0   15.84    2.01
  16  -1   0   15.46    1.26
  16  -1   0   16.68    1.38
 -17   1   0    1.66    0.52
 -17   1   0    1.50    0.51
 -17   1   0    1.62    0.31
 -17   1   0    2.47    0.66
  17  -1   0    2.41    0.65
  17  -1   0    2.58    0.46
  17  -1   0    1.77    0.54
  17  -1   0    1.72    0.38
  17  -1   0    1.74    0.39
 -18   1   0   10.78    1.28
 -18   1   0   10.57    1.14
 -18   1   0    8.96    1.04
  18  -1   0   11.20    0.90
  18  -1   0    9.87    0.80
  18  -1   0    8.51    1.08
  18   2   0    0.34    0.32
  18   2   0    1.62    0.64
  18   2   0    1.57    0.59
  18   2   0    1.08    0.36
  18   2   0    2.48    0.47
 -18  -2   0    1.48    0.66
 -18  -2   0    1.51    0.35
 -18  -2   0    2.49    0.64
 -18  -2   0    2.24    0.66
  17   2   0    2.04    0.39
  17   2   0    1.35    0.51
  17   2   0    2.97    0.49
  17   2   0    2.63    0.73
  17   2   0    2.52    0.42
 -17  -2   0    2.31    0.38
 -17  -2   0    3.11    0.65
 -17  -2   0    2.29    0.65
 -17  -2   0    1.61    0.52
  16   2   0    0.75    0.42
  16   2   0    0.24    0.41
  16   2   0    0.61    0.44
  16   2   0    1.41    0.32
  16   2   0    1.10    0.33
  16   2   0    0.34    0.25
 -16  -2   0    0.46    0.11
 -16  -2   0    0.72    0.44
 -16  -2   0    1.02    0.27
 -16  -2   0    0.94    0.44
 -16  -2   0    1.11    0.47
  15   2   0    0.06    0.21
  15   2   0    0.26    0.42
  15   2   0    0.41    0.26
  15   2   0    0.06    0.30
  15   2   0    0.14    0.23
  15   2   0    0.24    0.36
 -15  -2   0    0.15    0.09
 -15  -2   0    0.28    0.35
 -15  -2   0    0.17    0.51
 -15  -2   0    0.23    0.13
 -15  -2   0    0.42    0.24
 -15  -2   0    0.37    0.11
 -15  -2   0    1.02    0.44
 -15  -2   0    0.14    0.33
 -15  -2   0    0.11    0.09
  14   2   0    1.00    0.26
  14   2   0    0.84    0.42
  14   2   0    1.37    0.43
  14   2   0    0.72    0.24
  14   2   0    0.88    0.36
  14   2   0    0.61    0.42
  14   2   0    0.98    0.30
 -14  -2   0    1.07    0.17
 -14  -2   0    1.21    0.27
 -14  -2   0    1.32    0.41
 -14  -2   0    0.72    0.35
 -14  -2   0    0.90    0.16
 -14  -2   0    1.53    0.67
 -14  -2   0    0.95    0.14
 -14  -2   0    0.84    0.13
 -14  -2   0    0.62    0.31
 -14  -2   0    0.98    0.13
  13   2   0    7.58    0.58
  13   2   0    6.91    0.61
  13   2   0    7.22    0.60
  13   2   0    7.57    0.94
  13   2   0    7.43    0.85
  13   2   0    7.04    0.78
  13   2   0    7.18    0.56
  13   2   0    8.15    0.71
  13   2   0    7.60    0.95
 -13  -2   0    7.44    0.81
 -13  -2   0    7.40    1.23
 -13  -2   0    6.66    0.78
 -13  -2   0    7.04    0.42
 -13  -2   0    7.14    0.47
 -13  -2   0    7.00    0.44
 -13  -2   0    6.25    1.05
 -13  -2   0    7.10    0.42
 -13  -2   0    6.20    1.63
 -13  -2   0    6.75    0.47
 -13  -2   0    7.14    0.59
 -13  -2   0    6.28    0.77
  12   2   0    2.63    0.54
  12   2   0    1.43    0.27
  12   2   0    1.53    0.45
  12   2   0    1.14    0.33
  12   2   0    1.95    0.33
  12   2   0    1.20    0.39
  12   2   0    1.23    0.24
  12   2   0    0.86    0.31
  12   2   0    1.87    0.30
  12   2   0    2.01    0.42
  12   2   0    1.96    0.34
  12   2   0    1.90    0.49
 -12  -2   0    1.38    0.24
 -12  -2   0    1.55    0.19
 -12  -2   0    1.64    0.18
 -12  -2   0    1.68    0.81
 -12  -2   0    1.30    0.11
 -12  -2   0    1.57    0.30
 -12  -2   0    1.47    0.17
 -12  -2   0    0.95    0.54
 -12  -2   0    1.47    0.23
 -12  -2   0    1.31    0.19
 -12  -2   0    1.25    0.58
 -12  -2   0    1.24    0.16
 -12  -2   0    1.31    0.37
 -12  -2   0    0.92    0.36
 -12  -2   0    1.91    0.42
 -12  -2   0    1.57    0.32
 -12  -2   0    1.16    0.16
 -12  -2   0    1.30    0.20
  11   2   0    7.77    0.54
  11   2   0    7.98    0.61
  11   2   0    8.04    0.81
  11   2   0    7.08    0.76
  11   2   0    7.32    0.55
  11   2   0    7.62    0.88
  11   2   0    8.05    0.57
  11   2   0    6.40    0.82
  11   2   0    7.37    0.54
  11   2   0    7.36    0.69
  11   2   0    6.85    0.64
  11   2   0    8.66    0.91
  11   2   0    5.87    0.58
 -11  -2   0    8.41    0.53
 -11  -2   0    7.38    0.71
 -11  -2   0    8.63    1.44
 -11  -2   0    7.44    0.54
 -11  -2   0    7.73    0.41
 -11  -2   0    7.62    0.46
 -11  -2   0    8.92    0.67
 -11  -2   0    7.90    1.03
 -11  -2   0    6.31    0.72
 -11  -2   0    7.48    0.76
 -11  -2   0    8.38    1.17
 -11  -2   0    7.13    0.47
 -11  -2   0    7.32    0.59
 -11  -2   0    8.31    0.46
 -11  -2   0    8.07    0.51
 -11  -2   0    7.49    0.45
 -11  -2   0    7.87    0.46
 -11  -2   0    7.85    0.69
 -11  -2   0    8.39    0.50
  10   2   0    8.59    0.77
  10   2   0    7.47    0.82
  10   2   0    7.92    0.65
  10   2   0    7.85    0.59
  10   2   0    8.28    0.55
  10   2   0    6.49    0.57
  10   2   0    6.77    0.72
  10   2   0    8.74    0.70
  10   2   0    7.96    0.67
  10   2   0    8.07    0.53
  10   2   0    8.49    1.28
  10   2   0    8.32    0.57
  10   2   0    8.27    0.80
  10   2   0    7.99    0.54
 -10  -2   0    7.94    0.98
 -10  -2   0    7.11    0.57
 -10  -2   0    7.63    0.46
 -10  -2   0    7.66    0.54
 -10  -2   0    7.20    0.46
 -10  -2   0    8.19    0.43
 -10  -2   0    8.04    0.59
 -10  -2   0    8.01    0.48
 -10  -2   0    8.68    1.38
 -10  -2   0    7.65    1.05
 -10  -2   0    8.73    0.52
 -10  -2   0    7.95    0.45
 -10  -2   0    7.86    0.51
 -10  -2   0    8.23    0.47
 -10  -2   0    7.36    0.67
 -10  -2   0    7.69    0.67
 -10  -2   0    8.74    0.66
 -10  -2   0    8.97    0.70
 -10  -2   0    7.42    0.65
 -10  -2   0    8.89    0.54
 -10  -2   0    8.79    0.50
   9   2   0    0.19    0.20
   9   2   0    0.12    0.38
   9   2   0    0.13    0.22
   9   2   0    0.66    0.19
   9   2   0    0.26    0.13
   9   2   0    0.42    0.23
   9   2   0    0.44    0.24
   9   2   0    0.47    0.16
   9   2   0    0.36    0.14
   9   2   0    0.58    0.21
   9   2   0    0.51    0.16
   9   2   0    0.41    0.15
   9   2   0    0.44    0.24
   9   2   0    0.31    0.15
   9   2   0    0.22    0.22
   9   2   0    0.12    0.25
  -9  -2   0    0.42    0.08
  -9  -2   0    0.47    0.17
  -9  -2   0    0.39    0.10
  -9  -2   0    0.40    0.11
  -9  -2   0    0.38    0.10
  -9  -2   0    0.34    0.21
  -9  -2   0    0.18    0.11
  -9  -2   0    0.28    0.18
  -9  -2   0    0.60    0.11
  -9  -2   0    0.37    0.21
  -9  -2   0    0.16    0.11
  -9  -2   0    0.34    0.23
  -9  -2   0    0.48    0.13
  -9  -2   0    0.44    0.10
  -9  -2   0    0.39    0.11
  -9  -2   0    0.56    0.35
  -9  -2   0    0.69    0.49
  -9  -2   0    0.46    0.14
  -9  -2   0    0.28    0.31
  -9  -2   0    0.28    0.12
  -9  -2   0    0.66    0.21
  -9  -2   0    0.48    0.21
   8   2   0    7.67    0.63
   8   2   0    5.93    0.51
   8   2   0    7.38    0.62
   8   2   0    7.74    0.48
   8   2   0    7.43    0.50
   8   2   0    5.97    0.62
   8   2   0    8.21    0.53
   8   2   0    7.44    1.10
   8   2   0    6.67    0.74
   8   2   0    8.08    0.66
   8   2   0    7.95    0.51
   8   2   0    7.57    0.48
   8   2   0    7.74    0.49
   8   2   0    7.86    0.60
   8   2   0    7.18    0.66
   8   2   0    7.16    0.56
  -8  -2   0    7.15    1.12
  -8  -2   0    7.49    0.49
  -8  -2   0    7.09    0.61
  -8  -2   0    7.50    0.43
  -8  -2   0    7.69    0.44
  -8  -2   0    7.96    0.85
  -8  -2   0    7.68    0.48
  -8  -2   0    8.08    0.58
  -8  -2   0    7.15    0.60
  -8  -2   0    8.41    0.88
  -8  -2   0    7.31    0.54
  -8  -2   0    7.61    0.50
  -8  -2   0    8.45    0.47
  -8  -2   0    7.08    0.60
  -8  -2   0    7.91    0.53
  -8  -2   0    7.11    0.46
  -8  -2   0    9.15    0.66
  -8  -2   0    7.16    0.44
  -8  -2   0    7.80    0.46
  -8  -2   0    8.29    0.48
  -8  -2   0    7.88    0.44
  -8  -2   0    7.64    0.59
   7   2   0    0.77    0.15
   7   2   0    0.45    0.14
   7   2   0    0.82    0.23
   7   2   0    0.67    0.28
   7   2   0    0.72    0.18
   7   2   0    0.80    0.20
   7   2   0    0.98    0.17
   7   2   0    0.73    0.25
   7   2   0    0.74    0.21
   7   2   0    0.67    0.16
   7   2   0    0.73    0.14
   7   2   0    1.07    0.44
   7   2   0    0.94    0.24
   7   2   0    0.91    0.14
   7   2   0    0.92    0.15
   7   2   0    0.77    0.23
   7   2   0    0.77    0.14
  -7  -2   0    0.80    0.21
  -7  -2   0    0.92    0.15
  -7  -2   0    0.85    0.10
  -7  -2   0    0.84    0.14
  -7  -2   0    0.83    0.18
  -7  -2   0    0.69    0.11
  -7  -2   0    0.83    0.12
  -7  -2   0    0.86    0.12
  -7  -2   0    0.94    0.23
  -7  -2   0    0.96    0.13
  -7  -2   0    1.08    0.23
  -7  -2   0    0.82    0.13
  -7  -2   0    0.80    0.23
  -7  -2   0    0.89    0.20
  -7  -2   0    0.78    0.33
  -7  -2   0    0.56    0.40
  -7  -2   0    0.59    0.13
  -7  -2   0    0.92    0.34
  -7  -2   0    0.93    0.22
  -7  -2   0    0.75    0.16
   6   2   0    0.05    0.10
   6   2   0    0.13    0.13
   6   2   0    0.02    0.09
   6   2   0    0.10    0.07
   6   2   0    0.25    0.16
   6   2   0    0.23    0.17
   6   2   0    0.09    0.15
   6   2   0    0.22    0.10
   6   2   0    0.13    0.20
   6   2   0    0.30    0.15
   6   2   0    0.16    0.14
   6   2   0    0.12    0.09
   6   2   0    0.37    0.11
   6   2   0    0.35    0.11
   6   2   0    0.35    0.32
   6   2   0    0.12    0.09
   6   2   0    0.34    0.13
  -6  -2   0    0.31    0.14
  -6  -2   0    0.19    0.10
  -6  -2   0    0.21    0.09
  -6  -2   0    0.28    0.09
  -6  -2   0    0.33    0.10
  -6  -2   0    0.11    0.08
  -6  -2   0    0.21    0.08
  -6  -2   0    0.16    0.14
  -6  -2   0   -0.01    0.13
  -6  -2   0    0.31    0.24
  -6  -2   0    0.25    0.09
  -6  -2   0    0.21    0.08
  -6  -2   0    0.21    0.23
  -6  -2   0    0.49    0.20
  -6  -2   0    0.52    0.33
  -6  -2   0    0.16    0.14
  -6  -2   0    0.22    0.14
  -6  -2   0    0.28    0.15
  -6  -2   0    0.12    0.11
  -6  -2   0    0.10    0.06
   5   2   0   14.72    0.79
   5   2   0   14.99    0.78
   5   2   0   14.25    0.76
   5   2   0   14.77    0.92
   5   2   0   14.30    0.99
   5   2   0   14.28    0.78
   5   2   0   13.89    0.89
   5   2   0   13.58    0.84
   5   2   0   15.29    0.79
   5   2   0   14.06    0.87
   5   2   0   13.98    1.18
   5   2   0   13.38    0.82
   5   2   0   15.65    1.15
   5   2   0   15.50    0.89
   5   2   0   14.99    0.77
  -5  -2   0   14.80    0.77
  -5  -2   0   15.92    0.83
  -5  -2   0   14.45    0.97
  -5  -2   0   15.73    0.77
  -5  -2   0   16.75    0.90
  -5  -2   0   15.70    0.87
  -5  -2   0   14.31    0.75
  -5  -2   0   13.89    0.79
  -5  -2   0   14.91    1.05
  -5  -2   0   14.69    0.76
  -5  -2   0   13.98    0.83
  -5  -2   0   14.30    0.77
  -5  -2   0   13.72    0.87
  -5  -2   0   14.18    0.87
  -5  -2   0   14.12    0.81
  -5  -2   0   13.77    0.88
  -5  -2   0   13.88    0.79
  -5  -2   0   15.37    0.78
  -5  -2   0   13.86    1.19
  -5  -2   0   15.47    1.09
   4   2   0    4.74    0.34
   4   2   0    5.46    0.56
   4   2   0    4.92    0.30
   4   2   0    4.91    0.29
   4   2   0    4.95    0.30
   4   2   0    4.80    0.29
   4   2   0    5.09    0.39
   4   2   0    5.52    0.42
   4   2   0    5.04    0.42
   4   2   0    5.59    0.39
   4   2   0    4.58    0.35
   4   2   0    5.35    0.69
   4   2   0    4.72    0.30
   4   2   0    4.88    0.31
   4   2   0    4.95    0.39
   4   2   0    4.55    0.45
  -4  -2   0    4.35    0.31
  -4  -2   0    5.14    0.51
  -4  -2   0    4.96    0.38
  -4  -2   0    5.95    0.41
  -4  -2   0    5.13    0.33
  -4  -2   0    4.80    0.29
  -4  -2   0    5.01    0.30
  -4  -2   0    5.04    0.35
  -4  -2   0    4.56    0.31
  -4  -2   0    4.45    0.36
  -4  -2   0    5.06    0.28
  -4  -2   0    4.45    0.38
  -4  -2   0    5.16    0.41
  -4  -2   0    4.79    0.49
  -4  -2   0    4.38    0.63
  -4  -2   0    4.08    0.29
  -4  -2   0    5.53    0.31
  -4  -2   0    5.03    0.37
  -4  -2   0    4.20    0.35
  -4  -2   0    4.83    0.29
  -4  -2   0    4.36    0.32
  -4  -2   0    4.81    0.29
   3   2   0    0.06    0.12
   3   2   0    0.07    0.10
   3   2   0    0.13    0.06
   3   2   0    0.16    0.08
   3   2   0    0.11    0.08
   3   2   0    0.13    0.14
   3   2   0   -0.04    0.12
   3   2   0    0.26    0.24
   3   2   0    0.11    0.06
   3   2   0    0.07    0.11
   3   2   0    0.29    0.19
   3   2   0    0.26    0.12
   3   2   0    0.42    0.08
   3   2   0    0.27    0.07
   3   2   0    0.14    0.06
   3   2   0    0.05    0.10
   3   2   0    0.09    0.08
   3   2   0    0.10    0.05
   3   2   0    0.12    0.06
   3   2   0    0.16    0.05
  -3  -2   0    0.05    0.10
  -3  -2   0    0.13    0.10
  -3  -2   0    0.07    0.06
  -3  -2   0    0.12    0.06
  -3  -2   0    0.19    0.05
  -3  -2   0    0.13    0.15
  -3  -2   0    0.09    0.15
  -3  -2   0    0.15    0.05
  -3  -2   0    0.31    0.13
  -3  -2   0    0.23    0.07
  -3  -2   0    0.25    0.09
  -3  -2   0    0.20    0.08
  -3  -2   0    0.16    0.12
  -3  -2   0    0.12    0.06
  -3  -2   0    0.21    0.08
  -3  -2   0    0.18    0.10
  -3  -2   0    0.23    0.07
  -3  -2   0    0.16    0.06
  -3  -2   0    0.18    0.10
  -3  -2   0    0.20    0.20
  -3  -2   0    0.08    0.11
   2   2   0    9.49    0.58
   2   2   0   10.66    0.54
   2   2   0    9.89    0.56
   2   2   0    9.97    0.53
   2   2   0   10.96    0.59
   2   2   0    9.86    0.61
   2   2   0   10.54    0.54
   2   2   0   11.40    0.54
   2   2   0   10.97    0.55
   2   2   0   10.70    0.54
   2   2   0   10.40    0.54
   2   2   0   10.79    0.79
   2   2   0   10.38    0.63
   2   2   0    8.55    0.71
   2   2   0   10.57    0.54
   2   2   0   10.28    0.57
   2   2   0    8.81    0.54
   2   2   0   10.86    0.53
   2   2   0    9.93    0.59
   2   2   0   10.16    0.59
  -2  -2   0   10.47    0.54
  -2  -2   0   11.51    0.53
  -2  -2   0   10.11    0.55
  -2  -2   0    9.95    0.59
  -2  -2   0   11.31    0.54
  -2  -2   0   10.37    0.58
  -2  -2   0   10.72    0.67
  -2  -2   0   11.48    0.53
  -2  -2   0   11.20    0.60
  -2  -2   0   10.49    0.54
  -2  -2   0   11.02    0.55
  -2  -2   0   10.77    0.59
  -2  -2   0   10.13    0.54
  -2  -2   0   10.70    0.54
  -2  -2   0    9.98    0.56
  -2  -2   0    9.95    0.73
  -2  -2   0   10.90    0.54
  -2  -2   0    9.37    0.62
  -2  -2   0    9.67    0.59
  -2  -2   0   10.35    0.57
  -2  -2   0   10.32    0.61
   1   2   0    0.22    0.08
   1   2   0    0.05    0.04
   1   2   0   -0.04    0.07
   1   2   0    0.13    0.04
   1   2   0    0.16    0.07
   1   2   0    0.19    0.04
   1   2   0    0.14    0.04
   1   2   0    0.10    0.06
   1   2   0    0.21    0.05
   1   2   0    0.21    0.05
   1   2   0    0.25    0.06
   1   2   0    0.19    0.05
   1   2   0    0.08    0.12
   1   2   0    0.28    0.08
   1   2   0    0.26    0.10
   1   2   0    0.20    0.04
   1   2   0    0.13    0.04
   1   2   0    0.38    0.17
   1   2   0    0.10    0.06
  -1  -2   0    0.13    0.09
  -1  -2   0    0.15    0.05
  -1  -2   0    0.21    0.04
  -1  -2   0    0.18    0.04
  -1  -2   0    0.23    0.05
  -1  -2   0    0.15    0.06
  -1  -2   0    0.22    0.05
  -1  -2   0    0.19    0.04
  -1  -2   0    0.12    0.04
  -1  -2   0    0.15    0.11
  -1  -2   0    0.37    0.06
  -1  -2   0    0.35    0.08
  -1  -2   0    0.22    0.08
  -1  -2   0    0.21    0.09
  -1  -2   0    0.30    0.06
  -1  -2   0    0.18    0.05
  -1  -2   0    0.20    0.06
  -1  -2   0    0.20    0.10
  -1  -2   0    0.22    0.15
   0   2   0   15.40    0.86
   0   2   0   16.97    0.82
   0   2   0   16.66    0.84
   0   2   0   16.53    0.84
   0   2   0   17.01    0.93
   0   2   0   16.92    0.84
   0   2   0   15.77    0.81
   0   2   0   15.97    0.82
   0   2   0   15.77    0.87
   0   2   0   16.91    0.81
   0   2   0   15.41    0.84
   0   2   0   16.45    0.81
   0   2   0   16.89    0.83
   0   2   0   16.81    0.81
   0   2   0   16.62    0.81
   0  -2   0   16.90    0.81
   0  -2   0   15.83    0.82
   0  -2   0   16.12    0.83
   0  -2   0   17.19    0.82
   0  -2   0   16.90    0.81
   0  -2   0   17.38    0.92
   0  -2   0   15.94    0.87
   0  -2   0   17.28    0.81
   0  -2   0   18.06    0.84
   0  -2   0   17.77    0.83
   0  -2   0   16.77    0.84
   0  -2   0   15.88    0.81
   0  -2   0   16.20    0.84
   0  -2   0   15.96    0.82
   0  -2   0   15.81    0.82
   0  -2   0   14.68    0.87
   0  -2   0   17.57    0.81
   0  -2   0   16.94    0.82
  -1   2   0    0.19    0.05
  -1   2   0    0.15    0.06
  -1   2   0    0.13    0.03
  -1   2   0    0.21    0.05
  -1   2   0    0.19    0.10
  -1   2   0    0.12    0.03
  -1   2   0    0.13    0.05
  -1   2   0    0.15    0.03
  -1   2   0    0.25    0.05
  -1   2   0    0.23    0.05
  -1   2   0    0.15    0.03
  -1   2   0    0.13    0.06
  -1   2   0    0.17    0.04
  -1   2   0    0.16    0.03
  -1   2   0    0.15    0.02
  -1   2   0    0.14    0.07
  -1   2   0    0.12    0.07
  -1   2   0    0.31    0.08
   1  -2   0    0.23    0.07
   1  -2   0    0.14    0.03
   1  -2   0    0.26    0.07
   1  -2   0    0.18    0.04
   1  -2   0    0.13    0.06
   1  -2   0    0.21    0.04
   1  -2   0    0.14    0.04
   1  -2   0    0.14    0.05
   1  -2   0    0.11    0.07
   1  -2   0    0.10    0.03
   1  -2   0    0.28    0.10
   1  -2   0    0.08    0.04
   1  -2   0    0.16    0.03
   1  -2   0    0.12    0.05
   1  -2   0    0.12    0.03
   1  -2   0    0.09    0.04
   1  -2   0    0.23    0.03
   1  -2   0    0.17    0.03
   1  -2   0    0.21    0.07
   1  -2   0    0.19    0.04
  -2   2   0   10.33    0.55
  -2   2   0   10.97    0.53
  -2   2   0   11.50    0.58
  -2   2   0   10.54    0.56
  -2   2   0   11.67    0.56
  -2   2   0   10.33    0.55
  -2   2   0   11.34    0.58
  -2   2   0   10.05    0.59
  -2   2   0   10.11    0.54
  -2   2   0   11.06    0.60
  -2   2   0   10.76    0.54
  -2   2   0   10.89    0.55
  -2   2   0   10.88    0.59
  -2   2   0   10.98    0.55
  -2   2   0   11.21    0.57
  -2   2   0   11.11    0.57
  -2   2   0   11.80    0.67
  -2   2   0   11.31    0.53
  -2   2   0   10.96    0.56
   2  -2   0   10.74    0.55
   2  -2   0   10.93    0.55
   2  -2   0   10.55    0.65
   2  -2   0   10.83    0.59
   2  -2   0   11.19    0.58
   2  -2   0   10.29    0.60
   2  -2   0   10.95    0.54
   2  -2   0   11.16    0.54
   2  -2   0   12.75    0.59
   2  -2   0   10.89    0.56
   2  -2   0   10.55    0.61
   2  -2   0   10.34    0.55
   2  -2   0   10.57    0.55
   2  -2   0   10.78    0.55
   2  -2   0   10.96    0.57
   2  -2   0   10.59    0.56
   2  -2   0   11.66    0.54
   2  -2   0   10.96    0.60
   2  -2   0   10.84    0.55
   2  -2   0   10.62    0.56
  -3   2   0    0.35    0.12
  -3   2   0    0.11    0.07
  -3   2   0    0.10    0.04
  -3   2   0    0.17    0.04
  -3   2   0    0.19    0.04
  -3   2   0    0.07    0.07
  -3   2   0    0.18    0.03
  -3   2   0    0.14    0.05
  -3   2   0    0.21    0.08
  -3   2   0    0.12    0.08
  -3   2   0    0.14    0.18
  -3   2   0    0.19    0.06
  -3   2   0    0.08    0.05
  -3   2   0    0.18    0.03
  -3   2   0    0.12    0.05
  -3   2   0    0.14    0.03
  -3   2   0    0.38    0.09
  -3   2   0    0.08    0.09
  -3   2   0    0.11    0.12
  -3   2   0    0.03    0.06
   3  -2   0    0.27    0.05
   3  -2   0    0.25    0.04
   3  -2   0    0.11    0.06
   3  -2   0    0.16    0.06
   3  -2   0    0.32    0.08
   3  -2   0    0.13    0.09
   3  -2   0    0.11    0.04
   3  -2   0    0.08    0.04
   3  -2   0    0.06    0.08
   3  -2   0    0.09    0.06
   3  -2   0    0.07    0.08
   3  -2   0    0.10    0.04
   3  -2   0    0.30    0.19
   3  -2   0    0.14    0.04
   3  -2   0    0.00    0.07
   3  -2   0    0.07    0.05
   3  -2   0    0.09    0.03
   3  -2   0    0.13    0.10
   3  -2   0    0.16    0.05
   3  -2   0    0.01    0.07
   3  -2   0    0.13    0.12
   3  -2   0    0.20    0.06
   3  -2   0    0.09    0.13
  -4   2   0    4.80    0.33
  -4   2   0    4.95    0.32
  -4   2   0    4.83    0.34
  -4   2   0    4.78    0.45
  -4   2   0    4.91    0.28
  -4   2   0    5.55    0.35
  -4   2   0    5.32    0.26
  -4   2   0    5.31    0.26
  -4   2   0    4.39    0.36
  -4   2   0    5.16    0.39
  -4   2   0    5.05    0.29
  -4   2   0    4.42    0.31
  -4   2   0    5.14    0.29
  -4   2   0    5.12    0.30
  -4   2   0    4.98    0.27
  -4   2   0    5.00    0.28
  -4   2   0    6.60    0.60
  -4   2   0    4.80    0.36
   4  -2   0    4.83    0.34
   4  -2   0    5.12    0.38
   4  -2   0    5.43    0.29
   4  -2   0    4.49    0.34
   4  -2   0    5.47    0.39
   4  -2   0    5.53    0.34
   4  -2   0    4.99    0.29
   4  -2   0    7.70    0.61
   4  -2   0    5.39    0.32
   4  -2   0    5.37    0.27
   4  -2   0    5.08    0.28
   4  -2   0    4.84    0.30
   4  -2   0    4.27    0.43
   4  -2   0    5.15    0.29
   4  -2   0    5.36    0.29
   4  -2   0    4.89    0.28
   4  -2   0    5.20    0.30
   4  -2   0    4.90    0.36
   4  -2   0    5.60    0.53
   4  -2   0    5.11    0.36
   4  -2   0    4.94    0.31
  -5   2   0   16.07    0.79
  -5   2   0   15.59    1.02
  -5   2   0   14.43    0.90
  -5   2   0   15.02    0.77
  -5   2   0   13.69    0.87
  -5   2   0   16.59    0.83
  -5   2   0   15.80    0.75
  -5   2   0   16.02    0.85
  -5   2   0   15.78    0.74
  -5   2   0   14.01    0.83
  -5   2   0   15.50    1.16
  -5   2   0   14.88    0.79
  -5   2   0   15.03    0.76
  -5   2   0   15.80    0.86
  -5   2   0   15.29    0.78
  -5   2   0   14.65    0.87
  -5   2   0   15.45    0.77
  -5   2   0   14.13    0.82
   5  -2   0   16.20    0.78
   5  -2   0   14.89    0.87
   5  -2   0   14.87    0.81
   5  -2   0   13.69    0.98
   5  -2   0   16.26    0.88
   5  -2   0   15.02    0.90
   5  -2   0   15.19    0.86
   5  -2   0   15.02    0.79
   5  -2   0   15.83    0.81
   5  -2   0   15.32    0.78
   5  -2   0   15.54    0.83
   5  -2   0   15.03    0.85
   5  -2   0   15.00    0.79
   5  -2   0   14.79    0.84
   5  -2   0   14.97    0.80
   5  -2   0   14.89    0.79
   5  -2   0   15.51    0.78
  -6   2   0    0.09    0.09
  -6   2   0    0.22    0.06
  -6   2   0    0.25    0.06
  -6   2   0    0.22    0.05
  -6   2   0    0.25    0.03
  -6   2   0   -0.03    0.17
  -6   2   0    0.30    0.03
  -6   2   0    0.27    0.13
  -6   2   0    0.15    0.07
  -6   2   0    0.24    0.10
  -6   2   0    0.34    0.14
  -6   2   0    0.29    0.04
  -6   2   0    0.19    0.13
  -6   2   0    0.17    0.26
  -6   2   0    0.34    0.13
  -6   2   0    0.26    0.07
  -6   2   0    0.23    0.14
  -6   2   0    0.22    0.05
  -6   2   0    0.14    0.12
  -6   2   0    0.18    0.08
   6  -2   0    0.33    0.12
   6  -2   0    0.31    0.07
   6  -2   0    0.17    0.14
   6  -2   0    0.42    0.14
   6  -2   0    0.27    0.08
   6  -2   0    0.16    0.24
   6  -2   0    0.37    0.08
   6  -2   0    0.27    0.15
   6  -2   0    0.30    0.09
   6  -2   0    0.39    0.09
   6  -2   0    0.19    0.06
   6  -2   0    0.24    0.09
   6  -2   0    0.25    0.13
   6  -2   0    0.27    0.17
   6  -2   0    0.24    0.10
   6  -2   0    0.43    0.21
   6  -2   0    0.29    0.13
   6  -2   0    0.17    0.15
   6  -2   0    0.38    0.10
  -7   2   0    1.00    0.11
  -7   2   0    0.79    0.18
  -7   2   0    0.86    0.22
  -7   2   0    0.67    0.07
  -7   2   0    1.24    0.34
  -7   2   0    1.09    0.13
  -7   2   0    1.16    0.18
  -7   2   0    0.72    0.18
  -7   2   0    1.18    0.15
  -7   2   0    1.00    0.21
  -7   2   0    0.90    0.10
  -7   2   0    0.90    0.11
  -7   2   0    0.84    0.09
  -7   2   0    0.55    0.35
  -7   2   0    0.77    0.13
  -7   2   0    0.77    0.18
  -7   2   0    0.98    0.16
   7  -2   0    1.14    0.26
   7  -2   0    1.04    0.23
   7  -2   0    0.77    0.13
   7  -2   0    1.02    0.14
   7  -2   0    0.67    0.20
   7  -2   0    1.29    0.27
   7  -2   0    1.14    0.14
   7  -2   0    0.81    0.15
   7  -2   0    1.29    0.33
   7  -2   0    0.61    0.18
   7  -2   0    1.27    0.19
   7  -2   0    1.25    0.41
   7  -2   0    1.00    0.15
   7  -2   0    1.36    0.18
   7  -2   0    0.91    0.19
   7  -2   0    0.91    0.12
   7  -2   0    1.05    0.21
   7  -2   0    1.01    0.13
  -8   2   0    7.86    0.40
  -8   2   0    7.89    0.60
  -8   2   0    7.82    0.81
  -8   2   0    7.75    0.44
  -8   2   0    8.42    0.53
  -8   2   0    8.52    0.59
  -8   2   0    7.41    0.51
  -8   2   0    8.16    0.45
  -8   2   0    8.01    0.49
  -8   2   0    7.41    0.60
  -8   2   0    7.78    0.43
  -8   2   0    6.55    1.04
  -8   2   0    8.81    0.47
  -8   2   0    7.46    0.57
  -8   2   0    7.54    0.42
  -8   2   0    7.60    0.44
  -8   2   0    7.58    0.48
  -8   2   0    7.67    0.42
   8  -2   0    8.13    0.62
   8  -2   0    8.42    0.58
   8  -2   0    7.99    0.48
   8  -2   0    7.64    0.46
   8  -2   0    7.56    0.51
   8  -2   0    7.18    0.50
   8  -2   0    7.73    0.58
   8  -2   0    8.45    0.55
   8  -2   0    7.71    0.66
   8  -2   0    8.10    0.65
   8  -2   0    7.94    0.62
   8  -2   0    8.76    0.64
   8  -2   0    7.94    0.49
  -9   2   0    0.40    0.09
  -9   2   0    0.53    0.08
  -9   2   0    0.48    0.23
  -9   2   0    0.51    0.14
  -9   2   0    0.33    0.11
  -9   2   0    0.39    0.10
  -9   2   0    0.38    0.06
  -9   2   0    0.47    0.08
  -9   2   0    0.33    0.19
  -9   2   0    0.40    0.16
  -9   2   0    0.49    0.22
  -9   2   0    0.50    0.45
  -9   2   0    0.66    0.23
  -9   2   0    0.76    0.22
  -9   2   0    0.50    0.15
  -9   2   0    0.33    0.08
  -9   2   0    0.37    0.08
  -9   2   0    0.49    0.33
   9  -2   0    0.62    0.15
   9  -2   0    0.72    0.17
   9  -2   0    0.67    0.15
   9  -2   0    0.53    0.22
   9  -2   0    0.48    0.23
   9  -2   0    0.70    0.24
   9  -2   0    0.33    0.18
   9  -2   0    0.40    0.12
   9  -2   0    0.59    0.17
   9  -2   0    0.62    0.22
   9  -2   0    0.72    0.24
 -10   2   0    7.65    1.25
 -10   2   0    8.56    0.50
 -10   2   0    7.95    0.45
 -10   2   0    7.84    0.44
 -10   2   0    9.27    0.59
 -10   2   0    7.88    0.92
 -10   2   0    8.03    0.51
 -10   2   0    7.86    0.44
 -10   2   0    7.77    0.44
 -10   2   0    7.81    0.64
 -10   2   0    7.39    0.72
 -10   2   0    7.87    0.67
 -10   2   0    7.90    0.45
 -10   2   0    8.10    0.52
 -10   2   0    7.81    0.70
 -10   2   0    8.29    0.42
  10  -2   0    8.04    0.69
  10  -2   0    7.89    0.72
  10  -2   0    8.03    0.57
  10  -2   0    8.52    0.65
  10  -2   0    7.84    0.66
  10  -2   0    8.79    0.55
  10  -2   0    8.61    0.74
  10  -2   0    6.95    0.55
  10  -2   0    9.50    0.73
  10  -2   0    8.10    0.51
  10  -2   0    8.57    0.54
 -11   2   0    7.32    0.75
 -11   2   0    7.56    0.42
 -11   2   0    7.67    0.52
 -11   2   0    7.75    0.43
 -11   2   0    7.78    0.43
 -11   2   0    8.24    0.74
 -11   2   0    7.65    0.43
 -11   2   0    7.51    1.05
 -11   2   0    6.51    1.28
 -11   2   0    8.14    0.67
 -11   2   0    7.48    0.48
 -11   2   0    8.95    0.59
 -11   2   0    7.85    0.40
  11  -2   0    6.55    0.72
  11  -2   0    7.65    0.52
  11  -2   0    7.52    0.54
  11  -2   0    7.78    0.58
  11  -2   0    7.40    0.81
  11  -2   0    8.12    0.55
  11  -2   0    6.44    0.56
  11  -2   0    7.41    0.66
  11  -2   0    8.25    0.68
  11  -2   0    8.20    0.81
 -12   2   0    1.16    0.38
 -12   2   0    1.60    0.39
 -12   2   0    0.66    0.60
 -12   2   0    1.19    0.13
 -12   2   0    1.47    0.14
 -12   2   0    1.38    0.10
 -12   2   0    1.11    0.33
 -12   2   0    1.57    0.23
 -12   2   0    1.36    0.11
 -12   2   0    1.37    0.26
 -12   2   0    2.46    0.67
  12  -2   0    1.43    0.36
  12  -2   0    1.03    0.35
  12  -2   0    1.13    0.27
  12  -2   0    1.07    0.37
  12  -2   0    1.19    0.28
  12  -2   0    1.71    0.24
  12  -2   0    1.66    0.26
  12  -2   0    1.23    0.33
  12  -2   0    1.00    0.38
  12  -2   0    1.04    0.24
 -13   2   0    7.01    0.37
 -13   2   0    6.68    0.71
 -13   2   0    9.38    1.25
 -13   2   0    4.15    1.18
 -13   2   0    7.64    0.81
 -13   2   0    6.77    0.37
 -13   2   0    7.45    0.85
 -13   2   0    7.28    0.52
  13  -2   0    7.55    0.60
  13  -2   0    6.50    0.75
  13  -2   0    6.68    0.52
  13  -2   0    6.62    0.54
  13  -2   0    7.72    0.77
  13  -2   0    6.21    0.83
  13  -2   0    6.56    0.82
  13  -2   0    7.39    0.84
 -14   2   0    0.64    0.32
 -14   2   0    0.92    0.42
 -14   2   0    1.25    0.61
 -14   2   0    0.91    0.23
 -14   2   0    0.73    0.36
  14  -2   0    0.53    0.34
  14  -2   0    1.03    0.29
  14  -2   0    0.58    0.34
  14  -2   0    0.93    0.35
  14  -2   0    0.94    0.24
  14  -2   0    0.78    0.40
  14  -2   0    1.38    0.46
  14  -2   0    0.70    0.23
 -15   2   0    0.44    0.20
 -15   2   0    0.22    0.31
 -15   2   0    0.45    0.38
 -15   2   0    0.42    0.34
  15  -2   0    0.27    0.24
  15  -2   0    0.13    0.37
  15  -2   0    0.40    0.23
  15  -2   0    0.88    0.41
  15  -2   0    0.55    0.38
  15  -2   0    0.55    0.27
 -16   2   0    0.05    0.38
 -16   2   0    0.44    0.22
 -16   2   0    0.28    0.35
 -16   2   0    0.56    0.37
  16  -2   0    0.52    0.37
  16  -2   0    0.89    0.27
  16  -2   0    1.17    0.35
  16  -2   0    0.73    0.28
  16  -2   0    1.45    0.50
 -17   2   0    2.77    0.70
 -17   2   0    2.96    0.60
 -17   2   0    3.20    0.61
  17  -2   0    2.39    0.46
  17  -2   0    2.30    0.58
  17  -2   0    3.46    0.47
 -18   2   0    1.58    0.61
 -18   2   0    1.72    0.53
 -18   2   0    1.66    0.55
  18  -2   0    1.98    0.43
  18  -2   0    1.68    0.53
  18  -2   0    1.65    0.38
  18   3   0    0.50    0.45
  18   3   0    1.18    0.35
  18   3   0    0.67    0.53
  18   3   0    0.65    0.34
  18   3   0    0.54    0.33
 -18  -3   0    0.04    0.40
 -18  -3   0    0.79    0.50
 -18  -3   0    0.40    0.28
  17   3   0    0.92    0.47
  17   3   0    0.39    0.30
  17   3   0    0.83    0.55
  17   3   0    1.45    0.37
  17   3   0    0.82    0.30
 -17  -3   0    0.19    0.43
 -17  -3   0    0.47    0.49
 -17  -3   0    0.99    0.33
 -17  -3   0    0.39    0.43
  16   3   0    7.21    0.73
  16   3   0    5.68    0.84
  16   3   0    6.04    0.60
  16   3   0    6.18    0.98
  16   3   0    5.69    0.60
  16   3   0    5.25    0.80
 -16  -3   0    5.96    0.85
 -16  -3   0    5.92    0.35
 -16  -3   0    7.15    0.60
 -16  -3   0    5.88    0.40
 -16  -3   0    5.71    0.34
 -16  -3   0    6.57    0.84
 -16  -3   0    6.91    1.28
 -16  -3   0    5.37    0.83
  15   3   0    7.38    0.65
  15   3   0    7.70    0.64
  15   3   0    8.81    1.08
  15   3   0    8.63    0.73
  15   3   0    8.09    0.97
  15   3   0    8.97    0.96
 -15  -3   0    8.05    0.46
 -15  -3   0    7.41    0.92
 -15  -3   0    8.71    0.53
 -15  -3   0    8.41    0.91
 -15  -3   0    8.37    0.48
 -15  -3   0    8.35    0.49
 -15  -3   0    8.49    0.68
 -15  -3   0    8.01    0.51
 -15  -3   0    8.06    0.94
 -15  -3   0    8.60    1.36
  14   3   0    0.47    0.44
  14   3   0    0.68    0.28
  14   3   0    1.14    0.42
  14   3   0    0.58    0.24
  14   3   0    0.58    0.34
  14   3   0    0.53    0.23
 -14  -3   0    0.44    0.52
 -14  -3   0    0.81    0.40
 -14  -3   0    0.50    0.16
 -14  -3   0    0.02    0.29
 -14  -3   0    0.75    0.26
 -14  -3   0    0.70    0.14
 -14  -3   0    0.70    0.15
 -14  -3   0    0.63    0.12
 -14  -3   0   -0.09    0.27
 -14  -3   0    0.63    0.17
  13   3   0   20.75    1.46
  13   3   0   18.37    1.38
  13   3   0   20.34    1.23
  13   3   0   21.39    1.58
  13   3   0   21.18    1.59
  13   3   0   22.86    1.42
  13   3   0   22.71    1.28
  13   3   0   22.45    1.24
  13   3   0   22.73    1.31
 -13  -3   0   20.15    1.41
 -13  -3   0   21.90    1.29
 -13  -3   0   21.02    1.15
 -13  -3   0   21.20    1.13
 -13  -3   0   20.96    1.11
 -13  -3   0   21.15    1.44
 -13  -3   0   20.39    1.16
 -13  -3   0   23.80    2.00
 -13  -3   0   21.39    1.44
 -13  -3   0   21.02    1.11
 -13  -3   0   21.11    1.10
  12   3   0   13.51    1.16
  12   3   0   15.10    1.15
  12   3   0   13.51    0.85
  12   3   0   12.60    0.98
  12   3   0   15.88    1.13
  12   3   0   13.68    0.86
  12   3   0   13.37    0.91
  12   3   0   13.06    0.87
  12   3   0   13.51    1.02
  12   3   0   12.98    1.05
 -12  -3   0   13.46    0.77
 -12  -3   0   12.93    1.01
 -12  -3   0   13.10    0.75
 -12  -3   0   13.41    1.43
 -12  -3   0   13.63    0.84
 -12  -3   0   13.24    0.75
 -12  -3   0   13.51    0.80
 -12  -3   0   15.00    1.48
 -12  -3   0   13.85    0.74
 -12  -3   0   13.22    0.79
 -12  -3   0   14.07    0.92
 -12  -3   0   13.61    0.97
 -12  -3   0   14.82    1.08
 -12  -3   0   12.80    0.98
 -12  -3   0   14.07    0.83
 -12  -3   0   11.94    1.86
 -12  -3   0   14.08    0.70
  11   3   0   97.36    5.16
  11   3   0   96.60    5.01
  11   3   0   90.69    5.30
  11   3   0   94.21    5.18
  11   3   0  104.33    5.07
  11   3   0  102.82    5.09
  11   3   0   98.48    5.02
  11   3   0  104.46    5.04
  11   3   0  103.52    5.37
  11   3   0   92.62    5.22
  11   3   0  114.90    5.32
 -11  -3   0  103.23    4.95
 -11  -3   0  107.46    5.78
 -11  -3   0  114.30    5.24
 -11  -3   0   99.25    5.09
 -11  -3   0  101.09    4.95
 -11  -3   0  110.68    5.04
 -11  -3   0   96.38    5.23
 -11  -3   0  100.05    5.18
 -11  -3   0   90.22    6.05
 -11  -3   0  100.90    5.00
 -11  -3   0  101.22    4.97
 -11  -3   0  105.97    4.91
 -11  -3   0  100.93    5.21
 -11  -3   0  104.74    5.79
 -11  -3   0   96.86    4.93
 -11  -3   0  103.58    5.04
 -11  -3   0  101.46    5.24
  10   3   0   73.22    3.67
  10   3   0   71.44    3.60
  10   3   0   65.55    3.87
  10   3   0   70.55    3.81
  10   3   0   73.27    4.50
  10   3   0   79.78    3.86
  10   3   0   72.93    4.27
  10   3   0   67.64    3.87
  10   3   0   70.19    3.76
  10   3   0   70.51    3.63
  10   3   0   70.02    3.73
  10   3   0   71.73    3.62
  10   3   0   73.54    3.61
 -10  -3   0   65.27    3.78
 -10  -3   0   66.51    3.67
 -10  -3   0   79.71    3.81
 -10  -3   0   71.70    3.55
 -10  -3   0   72.81    3.81
 -10  -3   0   73.97    3.57
 -10  -3   0   71.48    3.59
 -10  -3   0   69.81    3.53
 -10  -3   0   75.61    4.25
 -10  -3   0   73.12    3.63
 -10  -3   0   73.82    4.28
 -10  -3   0   74.75    3.79
 -10  -3   0   80.08    3.59
 -10  -3   0   73.31    3.55
 -10  -3   0   73.04    3.67
 -10  -3   0   70.51    3.74
 -10  -3   0   74.22    3.55
 -10  -3   0   75.32    3.62
 -10  -3   0   61.60    4.46
   9   3   0   25.30    1.53
   9   3   0   24.56    1.34
   9   3   0   25.77    1.38
   9   3   0   25.00    1.59
   9   3   0   25.94    1.39
   9   3   0   24.13    1.46
   9   3   0   22.63    1.69
   9   3   0   25.42    1.37
   9   3   0   25.90    1.36
   9   3   0   25.88    1.61
   9   3   0   25.81    1.50
   9   3   0   25.26    1.41
   9   3   0   25.94    2.09
   9   3   0   28.23    1.57
  -9  -3   0   24.97    1.50
  -9  -3   0   23.41    1.42
  -9  -3   0   25.83    1.38
  -9  -3   0   25.81    1.53
  -9  -3   0   24.85    1.51
  -9  -3   0   25.83    1.42
  -9  -3   0   25.59    1.47
  -9  -3   0   25.33    2.13
  -9  -3   0   28.97    1.47
  -9  -3   0   25.22    1.31
  -9  -3   0   24.09    1.52
  -9  -3   0   24.37    1.29
  -9  -3   0   25.37    1.85
  -9  -3   0   25.24    1.35
  -9  -3   0   27.29    1.91
  -9  -3   0   25.59    1.31
  -9  -3   0   26.12    1.32
  -9  -3   0   25.95    1.33
  -9  -3   0   27.29    1.38
   8   3   0   29.09    1.65
   8   3   0   28.56    1.52
   8   3   0   28.22    1.82
   8   3   0   27.63    1.48
   8   3   0   26.21    1.56
   8   3   0   27.21    1.59
   8   3   0   27.41    1.46
   8   3   0   27.73    1.68
   8   3   0   27.43    1.63
   8   3   0   28.36    1.69
   8   3   0   27.13    1.47
   8   3   0   29.66    2.19
   8   3   0   29.45    1.50
   8   3   0   30.34    1.51
  -8  -3   0   26.51    1.55
  -8  -3   0   27.93    1.42
  -8  -3   0   27.74    1.44
  -8  -3   0   29.05    1.44
  -8  -3   0   28.24    1.47
  -8  -3   0   28.26    1.45
  -8  -3   0   28.59    1.61
  -8  -3   0   29.31    1.57
  -8  -3   0   30.55    1.66
  -8  -3   0   29.60    1.51
  -8  -3   0   24.42    2.11
  -8  -3   0   29.63    1.94
  -8  -3   0   27.82    1.53
  -8  -3   0   30.22    1.99
  -8  -3   0   26.19    1.61
  -8  -3   0   29.50    1.65
  -8  -3   0   27.94    1.46
  -8  -3   0   26.31    1.49
  -8  -3   0   29.69    1.49
   7   3   0    1.85    0.29
   7   3   0    1.37    0.29
   7   3   0    1.95    0.22
   7   3   0    2.33    0.40
   7   3   0    1.87    0.20
   7   3   0    1.95    0.42
   7   3   0    2.38    0.25
   7   3   0    2.00    0.21
   7   3   0    1.82    0.23
   7   3   0    1.69    0.22
   7   3   0    2.21    0.33
   7   3   0    2.06    0.25
   7   3   0    2.01    0.33
   7   3   0    1.44    0.51
   7   3   0    1.58    0.25
  -7  -3   0    2.39    0.64
  -7  -3   0    2.13    0.27
  -7  -3   0    2.16    0.22
  -7  -3   0    1.83    0.31
  -7  -3   0    1.96    0.19
  -7  -3   0    1.73    0.24
  -7  -3   0    1.89    0.30
  -7  -3   0    1.78    0.31
  -7  -3   0    1.75    0.19
  -7  -3   0    1.70    0.17
  -7  -3   0    2.16    0.36
  -7  -3   0    1.83    0.47
  -7  -3   0    2.14    0.24
  -7  -3   0    1.74    0.18
  -7  -3   0    1.86    0.31
  -7  -3   0    2.08    0.21
  -7  -3   0    1.70    0.22
  -7  -3   0    1.78    0.29
  -7  -3   0    1.47    0.42
   6   3   0    4.14    0.36
   6   3   0    4.01    0.31
   6   3   0    4.56    0.40
   6   3   0    3.96    0.47
   6   3   0    4.55    0.32
   6   3   0    3.94    0.29
   6   3   0    4.48    0.52
   6   3   0    4.30    0.31
   6   3   0    3.76    0.28
   6   3   0    3.40    0.46
   6   3   0    3.74    0.43
   6   3   0    4.30    0.31
   6   3   0    3.53    0.39
   6   3   0    4.40    0.78
   6   3   0    3.47    0.44
  -6  -3   0    3.60    0.57
  -6  -3   0    3.53    0.31
  -6  -3   0    4.12    0.42
  -6  -3   0    5.20    0.29
  -6  -3   0    4.33    0.43
  -6  -3   0    4.12    0.45
  -6  -3   0    3.84    0.39
  -6  -3   0    5.00    0.36
  -6  -3   0    4.65    0.48
  -6  -3   0    4.26    0.56
  -6  -3   0    4.42    0.32
  -6  -3   0    4.42    0.30
  -6  -3   0    4.24    0.27
  -6  -3   0    3.57    0.39
  -6  -3   0    3.56    0.72
  -6  -3   0    4.07    0.29
  -6  -3   0    3.83    0.29
  -6  -3   0    4.17    0.34
   5   3   0   52.34    2.51
   5   3   0   54.33    3.06
   5   3   0   51.68    2.50
   5   3   0   50.85    2.75
   5   3   0   51.03    2.60
   5   3   0   50.89    2.64
   5   3   0   48.27    2.94
   5   3   0   50.80    2.51
   5   3   0   48.61    2.57
   5   3   0   44.97    2.65
   5   3   0   48.19    2.48
   5   3   0   53.86    2.62
   5   3   0   47.41    2.55
   5   3   0   49.90    2.49
   5   3   0   48.14    2.64
   5   3   0   52.21    2.51
  -5  -3   0   52.66    2.54
  -5  -3   0   51.05    2.50
  -5  -3   0   51.63    2.88
  -5  -3   0   52.09    2.49
  -5  -3   0   52.71    2.82
  -5  -3   0   49.97    2.50
  -5  -3   0   49.09    2.47
  -5  -3   0   51.69    3.04
  -5  -3   0   52.51    2.59
  -5  -3   0   46.15    2.57
  -5  -3   0   56.58    2.64
  -5  -3   0   49.58    2.61
  -5  -3   0   57.25    2.53
  -5  -3   0   51.12    2.62
  -5  -3   0   44.02    2.52
  -5  -3   0   52.36    2.52
  -5  -3   0   50.14    2.54
  -5  -3   0   50.67    2.50
  -5  -3   0   47.37    2.49
  -5  -3   0   48.12    2.64
   4   3   0   17.55    1.36
   4   3   0   20.52    1.05
   4   3   0   19.96    1.05
   4   3   0   19.73    1.16
   4   3   0   20.80    1.16
   4   3   0   18.54    1.08
   4   3   0   20.78    1.04
   4   3   0   21.03    1.13
   4   3   0   19.57    1.18
   4   3   0   19.93    1.45
   4   3   0   19.87    1.10
   4   3   0   20.68    1.03
   4   3   0   21.54    1.13
   4   3   0   21.19    1.25
   4   3   0   19.63    1.04
   4   3   0   20.19    1.03
  -4  -3   0   19.76    1.17
  -4  -3   0   21.40    1.29
  -4  -3   0   20.19    1.35
  -4  -3   0   20.50    1.04
  -4  -3   0   21.52    1.03
  -4  -3   0   20.58    1.06
  -4  -3   0   21.70    1.12
  -4  -3   0   18.29    1.11
  -4  -3   0   20.55    1.14
  -4  -3   0   20.32    1.06
  -4  -3   0   20.82    1.08
  -4  -3   0   20.41    1.16
  -4  -3   0   18.89    1.04
  -4  -3   0   19.87    1.02
  -4  -3   0   22.21    1.04
  -4  -3   0   19.84    1.13
  -4  -3   0   20.21    1.05
  -4  -3   0   19.82    1.04
  -4  -3   0   20.64    1.14
   3   3   0   89.79    4.19
   3   3   0   91.42    4.38
   3   3   0   78.72    4.31
   3   3   0   84.21    4.19
   3   3   0   87.48    4.26
   3   3   0   86.49    4.18
   3   3   0   79.42    4.27
   3   3   0   84.70    4.19
   3   3   0   94.83    4.19
   3   3   0   88.63    4.20
   3   3   0   88.36    4.26
   3   3   0   84.31    4.21
   3   3   0   83.43    4.29
   3   3   0   78.60    4.22
   3   3   0   83.94    4.24
   3   3   0   79.20    4.54
   3   3   0   88.11    4.19
   3   3   0   79.16    4.18
  -3  -3   0   83.84    4.20
  -3  -3   0   77.97    4.49
  -3  -3   0   85.51    4.20
  -3  -3   0   86.57    4.18
  -3  -3   0   88.32    4.19
  -3  -3   0   91.20    4.30
  -3  -3   0   99.03    4.43
  -3  -3   0   90.16    4.28
  -3  -3   0   87.88    4.21
  -3  -3   0   83.03    4.19
  -3  -3   0   88.60    4.33
  -3  -3   0   86.69    4.28
  -3  -3   0   94.46    4.19
  -3  -3   0   85.38    4.20
  -3  -3   0   78.03    4.25
  -3  -3   0   86.86    4.25
  -3  -3   0   91.34    4.20
  -3  -3   0   85.84    4.22
  -3  -3   0   93.02    4.28
   2   3   0    2.92    0.20
   2   3   0    2.67    0.25
   2   3   0    2.96    0.24
   2   3   0    3.14    0.21
   2   3   0    3.16    0.19
   2   3   0    3.29    0.20
   2   3   0    3.20    0.21
   2   3   0    2.93    0.18
   2   3   0    3.37    0.25
   2   3   0    2.86    0.20
   2   3   0    2.97    0.20
   2   3   0    3.06    0.18
   2   3   0    2.99    0.21
   2   3   0    3.08    0.47
   2   3   0    2.73    0.23
   2   3   0    3.01    0.31
   2   3   0    3.00    0.26
   2   3   0    2.81    0.30
   2   3   0    2.78    0.22
  -2  -3   0    2.93    0.19
  -2  -3   0    3.04    0.20
  -2  -3   0    3.05    0.21
  -2  -3   0    3.37    0.47
  -2  -3   0    3.25    0.21
  -2  -3   0    3.09    0.26
  -2  -3   0    3.06    0.20
  -2  -3   0    3.20    0.33
  -2  -3   0    2.22    0.38
  -2  -3   0    2.99    0.22
  -2  -3   0    2.78    0.18
  -2  -3   0    3.34    0.25
  -2  -3   0    3.11    0.23
  -2  -3   0    2.78    0.20
  -2  -3   0    2.78    0.21
  -2  -3   0    3.28    0.26
  -2  -3   0    3.03    0.27
  -2  -3   0    2.77    0.30
  -2  -3   0    2.87    0.20
  -2  -3   0    3.03    0.27
   1   3   0  361.41   16.43
   1   3   0  347.18   16.42
   1   3   0  364.23   16.39
   1   3   0  341.46   16.32
   1   3   0  357.93   16.34
   1   3   0  334.15   16.31
   1   3   0  336.98   16.40
   1   3   0  322.32   16.31
   1   3   0  317.85   16.35
   1   3   0  339.30   16.78
   1   3   0  333.33   16.55
   1   3   0  339.33   16.45
   1   3   0  329.94   16.61
   1   3   0  343.80   16.34
   1   3   0  336.36   16.39
   1   3   0  302.04   16.34
  -1  -3   0  372.79   16.36
  -1  -3   0  349.98   16.25
  -1  -3   0  363.81   16.77
  -1  -3   0  349.13   16.40
  -1  -3   0  305.13   16.24
  -1  -3   0  314.01   16.29
  -1  -3   0  345.73   16.40
  -1  -3   0  300.97   16.25
  -1  -3   0  332.73   16.45
  -1  -3   0  304.69   16.31
  -1  -3   0  363.61   16.43
  -1  -3   0  333.74   16.35
  -1  -3   0  297.76   16.25
  -1  -3   0  367.23   16.34
  -1  -3   0  366.48   16.42
  -1  -3   0  312.90   16.40
  -1  -3   0  356.83   16.40
  -1  -3   0  326.57   16.61
   0   3   0    0.02    0.03
   0   3   0    0.06    0.05
   0   3   0    0.18    0.14
   0   3   0    0.14    0.05
   0   3   0    0.01    0.05
   0   3   0   -0.15    0.06
   0   3   0    0.05    0.04
   0   3   0    0.13    0.05
   0   3   0   -0.01    0.03
   0   3   0    0.04    0.09
   0   3   0    0.10    0.05
   0   3   0    0.07    0.07
   0   3   0    0.12    0.09
   0   3   0    0.05    0.06
   0   3   0    0.05    0.03
   0   3   0    0.03    0.03
   0   3   0    0.15    0.08
   0   3   0    0.11    0.06
   0  -3   0    0.10    0.08
   0  -3   0    0.03    0.03
   0  -3   0    0.10    0.06
   0  -3   0    0.08    0.06
   0  -3   0    0.10    0.06
   0  -3   0    0.03    0.04
   0  -3   0    0.05    0.05
   0  -3   0    0.10    0.12
   0  -3   0    0.01    0.04
   0  -3   0    0.07    0.05
   0  -3   0    0.03    0.08
   0  -3   0    0.06    0.08
   0  -3   0   -0.05    0.06
   0  -3   0   -0.01    0.03
   0  -3   0   -0.02    0.04
   0  -3   0    0.05    0.04
   0  -3   0    0.07    0.09
   0  -3   0    0.23    0.06
   0  -3   0    0.13    0.05
  -1   3   0  374.10   17.49
  -1   3   0  380.19   17.11
  -1   3   0  344.40   16.95
  -1   3   0  334.95   17.09
  -1   3   0  348.57   16.87
  -1   3   0  353.47   17.05
  -1   3   0  334.30   17.01
  -1   3   0  383.24   17.04
  -1   3   0  367.48   17.20
  -1   3   0  311.92   16.95
  -1   3   0  316.48   16.89
  -1   3   0  362.42   17.03
  -1   3   0  333.34   16.92
  -1   3   0  336.57   16.92
  -1   3   0  345.32   16.91
  -1   3   0  353.82   16.98
  -1   3   0  340.03   16.94
  -1   3   0  347.51   16.90
  -1   3   0  366.89   17.36
   1  -3   0  362.13   17.28
   1  -3   0  321.21   16.91
   1  -3   0  374.16   17.02
   1  -3   0  359.92   17.06
   1  -3   0  375.13   16.92
   1  -3   0  353.12   17.07
   1  -3   0  344.01   16.98
   1  -3   0  348.70   17.30
   1  -3   0  352.87   16.95
   1  -3   0  331.88   16.97
   1  -3   0  366.55   17.05
   1  -3   0  360.61   17.17
   1  -3   0  331.12   16.93
   1  -3   0  378.80   16.95
   1  -3   0  325.03   16.91
   1  -3   0  325.68   16.89
   1  -3   0  352.75   17.00
   1  -3   0  344.90   16.97
   1  -3   0  372.42   17.09
   1  -3   0  362.25   17.28
  -2   3   0    3.10    0.19
  -2   3   0    3.15    0.22
  -2   3   0    3.03    0.18
  -2   3   0    2.97    0.16
  -2   3   0    3.28    0.20
  -2   3   0    3.00    0.20
  -2   3   0    2.93    0.17
  -2   3   0    2.95    0.24
  -2   3   0    3.19    0.16
  -2   3   0    3.34    0.27
  -2   3   0    3.19    0.24
  -2   3   0    3.23    0.33
  -2   3   0    3.45    0.22
  -2   3   0    3.00    0.18
  -2   3   0    3.27    0.21
  -2   3   0    3.00    0.22
  -2   3   0    3.17    0.24
  -2   3   0    2.79    0.18
  -2   3   0    2.93    0.18
   2  -3   0    3.11    0.21
   2  -3   0    3.49    0.25
   2  -3   0    3.13    0.19
   2  -3   0    3.05    0.31
   2  -3   0    2.91    0.19
   2  -3   0    3.02    0.22
   2  -3   0    3.24    0.18
   2  -3   0    3.20    0.22
   2  -3   0    2.89    0.19
   2  -3   0    2.91    0.25
   2  -3   0    3.28    0.22
   2  -3   0    3.24    0.18
   2  -3   0    3.21    0.21
   2  -3   0    3.54    0.27
   2  -3   0    3.05    0.17
   2  -3   0    3.03    0.19
   2  -3   0    3.05    0.24
   2  -3   0    3.20    0.20
  -3   3   0   90.78    4.37
  -3   3   0   91.16    4.40
  -3   3   0   96.29    4.38
  -3   3   0   87.40    4.38
  -3   3   0   91.51    4.41
  -3   3   0   90.22    4.40
  -3   3   0   90.54    4.54
  -3   3   0   88.88    4.38
  -3   3   0   84.88    4.35
  -3   3   0   90.68    4.36
  -3   3   0   89.00    4.36
  -3   3   0   89.52    4.36
  -3   3   0   88.97    4.35
  -3   3   0   90.87    4.45
  -3   3   0   86.76    4.39
  -3   3   0   92.40    4.42
   3  -3   0   91.71    4.36
   3  -3   0   87.53    4.41
   3  -3   0   89.54    4.46
   3  -3   0   91.53    4.37
   3  -3   0   92.15    4.41
   3  -3   0   89.10    4.37
   3  -3   0   89.95    4.37
   3  -3   0   90.80    4.43
   3  -3   0   93.50    4.41
   3  -3   0   90.95    4.38
   3  -3   0   93.65    4.35
   3  -3   0   91.36    4.36
   3  -3   0   91.58    4.40
   3  -3   0   85.92    4.36
   3  -3   0   95.61    4.46
   3  -3   0   93.28    4.44
   3  -3   0   88.43    4.53
   3  -3   0   89.08    4.36
   3  -3   0   91.19    4.38
   3  -3   0   88.88    4.36
   3  -3   0   87.23    4.36
  -4   3   0   20.68    1.07
  -4   3   0   22.34    1.17
  -4   3   0   21.31    1.08
  -4   3   0   21.38    1.14
  -4   3   0   20.91    1.18
  -4   3   0   22.64    1.30
  -4   3   0   22.73    1.13
  -4   3   0   23.18    1.20
  -4   3   0   21.41    1.13
  -4   3   0   20.93    1.07
  -4   3   0   20.92    1.12
  -4   3   0   21.75    1.08
  -4   3   0   20.69    1.11
  -4   3   0   20.45    1.11
  -4   3   0   21.86    1.09
   4  -3   0   21.94    1.08
   4  -3   0   21.96    1.09
   4  -3   0   22.13    1.21
   4  -3   0   21.80    1.18
   4  -3   0   21.84    1.10
   4  -3   0   22.91    1.20
   4  -3   0   23.54    1.10
   4  -3   0   22.81    1.12
   4  -3   0   21.76    1.29
   4  -3   0   21.28    1.09
   4  -3   0   22.06    1.17
   4  -3   0   22.34    1.15
   4  -3   0   21.49    1.10
   4  -3   0   20.60    1.15
   4  -3   0   22.59    1.41
   4  -3   0   21.51    1.08
   4  -3   0   21.57    1.09
   4  -3   0   23.32    1.14
   4  -3   0   20.73    1.10
  -5   3   0   52.62    2.70
  -5   3   0   53.71    2.83
  -5   3   0   53.76    2.63
  -5   3   0   53.24    2.57
  -5   3   0   52.53    2.54
  -5   3   0   51.37    2.56
  -5   3   0   52.09    2.58
  -5   3   0   57.12    2.62
  -5   3   0   51.47    2.62
  -5   3   0   51.90    2.68
  -5   3   0   52.72    2.55
  -5   3   0   54.33    2.56
  -5   3   0   48.57    2.60
  -5   3   0   51.55    2.66
  -5   3   0   45.07    2.55
  -5   3   0   52.12    2.59
   5  -3   0   52.56    2.63
   5  -3   0   49.33    2.80
   5  -3   0   51.85    2.59
   5  -3   0   53.25    2.64
   5  -3   0   50.87    2.65
   5  -3   0   57.43    2.65
   5  -3   0   56.15    2.69
   5  -3   0   53.25    2.57
   5  -3   0   51.40    2.56
   5  -3   0   53.90    2.66
   5  -3   0   51.54    2.57
   5  -3   0   53.03    2.60
   5  -3   0   54.60    2.57
   5  -3   0   55.38    2.58
   5  -3   0   50.72    2.69
   5  -3   0   53.83    2.56
   5  -3   0   49.58    2.59
  -6   3   0    4.73    0.25
  -6   3   0    4.43    0.34
  -6   3   0    4.58    0.26
  -6   3   0    4.69    0.37
  -6   3   0    4.17    0.38
  -6   3   0    3.97    0.34
  -6   3   0    4.90    0.29
  -6   3   0    4.56    0.27
  -6   3   0    4.49    0.26
  -6   3   0    4.37    0.32
  -6   3   0    4.33    0.29
  -6   3   0    4.85    0.49
  -6   3   0    4.38    0.32
  -6   3   0    5.28    0.34
  -6   3   0    4.31    0.56
  -6   3   0    4.54    0.40
  -6   3   0    4.29    0.27
  -6   3   0    4.40    0.69
   6  -3   0    4.48    0.41
   6  -3   0    4.48    0.29
   6  -3   0    4.71    0.31
   6  -3   0    4.51    0.28
   6  -3   0    4.57    0.39
   6  -3   0    4.52    0.31
   6  -3   0    4.61    0.36
   6  -3   0    4.31    0.27
   6  -3   0    4.44    0.41
   6  -3   0    4.70    0.37
   6  -3   0    4.16    0.29
   6  -3   0    4.70    0.39
   6  -3   0    4.58    0.30
   6  -3   0    4.22    0.28
   6  -3   0    4.02    0.55
   6  -3   0    4.45    0.32
   6  -3   0    4.66    0.36
  -7   3   0    2.04    0.24
  -7   3   0    2.01    0.16
  -7   3   0    1.91    0.17
  -7   3   0    2.44    0.23
  -7   3   0    2.06    0.27
  -7   3   0    1.88    0.14
  -7   3   0    1.83    0.15
  -7   3   0    1.95    0.53
  -7   3   0    1.95    0.30
  -7   3   0    2.04    0.30
  -7   3   0    1.98    0.14
  -7   3   0    1.72    0.39
  -7   3   0    2.05    0.21
  -7   3   0    2.15    0.16
  -7   3   0    2.27    0.27
  -7   3   0    2.41    0.30
   7  -3   0    2.14    0.19
   7  -3   0    3.78    0.65
   7  -3   0    1.80    0.27
   7  -3   0    2.16    0.22
   7  -3   0    1.98    0.25
   7  -3   0    2.32    0.27
   7  -3   0    2.05    0.17
   7  -3   0    2.52    0.20
   7  -3   0    2.14    0.31
   7  -3   0    1.97    0.21
   7  -3   0    2.09    0.33
   7  -3   0    2.17    0.33
   7  -3   0    1.61    0.28
   7  -3   0    1.72    0.39
   7  -3   0    2.30    0.25
   7  -3   0    2.23    0.29
   7  -3   0    1.70    0.26
  -8   3   0   29.59    1.46
  -8   3   0   29.48    1.45
  -8   3   0   28.41    1.51
  -8   3   0   33.80    1.58
  -8   3   0   29.38    1.60
  -8   3   0   29.93    1.46
  -8   3   0   28.17    1.46
  -8   3   0   27.93    1.51
  -8   3   0   29.25    1.65
  -8   3   0   24.70    2.06
  -8   3   0   31.26    1.50
  -8   3   0   26.97    1.63
  -8   3   0   28.55    1.55
  -8   3   0   30.76    1.91
  -8   3   0   30.91    1.62
   8  -3   0   29.35    1.62
   8  -3   0   28.20    1.65
   8  -3   0   30.50    1.66
   8  -3   0   27.62    1.68
   8  -3   0   31.46    1.66
   8  -3   0   29.19    1.68
   8  -3   0   31.80    1.58
   8  -3   0   27.03    1.52
   8  -3   0   31.35    1.62
   8  -3   0   29.23    1.52
   8  -3   0   28.48    1.54
   8  -3   0   31.19    1.55
   8  -3   0   29.91    1.52
   8  -3   0   29.88    1.50
  -9   3   0   25.69    1.28
  -9   3   0   25.76    1.29
  -9   3   0   29.17    1.50
  -9   3   0   26.50    1.29
  -9   3   0   28.86    1.42
  -9   3   0   24.46    1.50
  -9   3   0   25.58    2.07
  -9   3   0   24.38    1.35
  -9   3   0   25.88    1.78
  -9   3   0   24.96    1.29
  -9   3   0   26.43    1.36
  -9   3   0   25.35    1.50
  -9   3   0   24.49    1.46
  -9   3   0   27.36    1.34
   9  -3   0   25.20    1.40
   9  -3   0   25.68    1.53
   9  -3   0   26.58    1.48
   9  -3   0   23.23    1.50
   9  -3   0   26.01    1.57
   9  -3   0   27.10    1.57
   9  -3   0   26.90    1.52
   9  -3   0   25.63    1.40
   9  -3   0   27.10    1.35
   9  -3   0   25.60    1.36
   9  -3   0   24.18    1.37
   9  -3   0   27.74    1.50
   9  -3   0   26.90    1.37
 -10   3   0   74.39    3.52
 -10   3   0   69.41    3.66
 -10   3   0   74.64    4.14
 -10   3   0   69.09    3.77
 -10   3   0   76.15    3.52
 -10   3   0   81.67    3.59
 -10   3   0   73.42    3.53
 -10   3   0   81.50    3.68
 -10   3   0   76.14    3.85
 -10   3   0   74.00    3.52
 -10   3   0   64.48    4.43
 -10   3   0   71.87    3.61
 -10   3   0   73.69    3.74
  10  -3   0   70.94    3.66
  10  -3   0   70.93    3.75
  10  -3   0   73.02    3.87
  10  -3   0   71.95    3.63
  10  -3   0   73.78    3.75
  10  -3   0   65.78    3.78
  10  -3   0   73.03    3.66
  10  -3   0   69.90    3.82
  10  -3   0   67.02    3.81
  10  -3   0   70.88    3.62
  10  -3   0   70.74    3.60
 -11   3   0  102.30    5.10
 -11   3   0   98.48    5.29
 -11   3   0  103.48    5.25
 -11   3   0  113.45    5.77
 -11   3   0  115.70    5.19
 -11   3   0  103.23    5.01
 -11   3   0  104.79    5.37
 -11   3   0   97.42    6.12
  11  -3   0  103.12    5.41
  11  -3   0  103.31    5.14
  11  -3   0  103.25    5.17
  11  -3   0  106.23    5.13
  11  -3   0  105.31    5.28
  11  -3   0  102.92    5.11
  11  -3   0  108.94    5.28
  11  -3   0  100.80    5.37
  11  -3   0  102.34    5.36
  11  -3   0   98.62    5.32
  11  -3   0   97.54    5.17
 -12   3   0   12.90    0.67
 -12   3   0   13.54    1.06
 -12   3   0   13.70    0.79
 -12   3   0   13.47    0.67
 -12   3   0   15.18    1.39
 -12   3   0   15.78    1.07
 -12   3   0   11.82    0.97
 -12   3   0   13.63    1.94
 -12   3   0   14.53    0.96
  12  -3   0   12.93    0.96
  12  -3   0   12.97    0.90
  12  -3   0   11.56    1.03
  12  -3   0   13.92    1.06
  12  -3   0   13.32    0.81
  12  -3   0   12.37    0.87
  12  -3   0   13.93    0.97
  12  -3   0   13.73    0.80
  12  -3   0   12.32    1.01
  12  -3   0   13.14    0.87
  12  -3   0   14.12    1.11
 -13   3   0   21.20    1.43
 -13   3   0   22.86    1.40
 -13   3   0   22.66    1.86
 -13   3   0   21.42    1.49
 -13   3   0   21.29    1.20
 -13   3   0   19.73    2.18
  13  -3   0   23.76    1.44
  13  -3   0   20.37    1.22
  13  -3   0   20.69    1.46
  13  -3   0   23.34    1.53
  13  -3   0   21.79    1.24
  13  -3   0   22.72    1.30
  13  -3   0   22.36    1.57
  13  -3   0   22.03    1.42
 -14   3   0    0.49    0.19
 -14   3   0    0.79    0.56
 -14   3   0    0.22    0.30
 -14   3   0    0.62    0.34
 -14   3   0    0.39    0.25
 -14   3   0    0.77    0.39
  14  -3   0    0.70    0.26
  14  -3   0    0.61    0.22
  14  -3   0    0.87    0.42
  14  -3   0    0.61    0.24
  14  -3   0    1.01    0.40
  14  -3   0    0.98    0.41
  14  -3   0    0.39    0.37
 -15   3   0    7.65    0.99
 -15   3   0    8.48    0.92
 -15   3   0    8.86    0.88
  15  -3   0    8.36    0.64
  15  -3   0    5.21    0.83
  15  -3   0    9.12    0.85
  15  -3   0   10.11    1.07
  15  -3   0    7.40    0.62
  15  -3   0    8.77    0.71
 -16   3   0    5.94    0.75
 -16   3   0    5.90    0.90
 -16   3   0    7.32    0.88
  16  -3   0    6.57    0.68
  16  -3   0    7.16    0.87
  16  -3   0    6.11    0.90
  16  -3   0    5.33    0.58
  16  -3   0    6.13    0.60
 -17   3   0   -0.04    0.39
 -17   3   0    0.83    0.26
 -17   3   0    2.04    0.54
 -17   3   0    0.30    0.46
  17  -3   0    1.07    0.46
  17  -3   0    0.76    0.31
  17  -3   0    1.01    0.33
 -18   3   0    0.84    0.57
 -18   3   0    0.79    0.44
 -18   3   0    0.26    0.38
  18  -3   0    1.72    0.40
  18  -3   0    1.49    0.54
  18  -3   0    0.28    0.30
  18   4   0   -0.08    0.39
  18   4   0    0.00    0.27
  18   4   0    0.15    0.29
  18   4   0    0.47    0.54
  18   4   0   -0.46    0.27
 -18  -4   0   -0.04    0.27
 -18  -4   0    0.77    0.52
  17   4   0   17.91    1.59
  17   4   0   17.44    1.15
  17   4   0   13.42    1.49
  17   4   0   17.38    1.22
  17   4   0   16.93    1.15
  17   4   0   16.01    1.40
 -17  -4   0   17.44    1.16
 -17  -4   0   19.26    2.10
 -17  -4   0   17.73    0.93
 -17  -4   0   17.04    1.40
 -17  -4   0   17.58    1.44
  16   4   0   10.24    1.26
  16   4   0    9.63    0.82
  16   4   0    9.44    0.76
  16   4   0   10.33    0.77
  16   4   0    9.27    1.11
  16   4   0    8.75    1.04
 -16  -4   0    7.18    1.00
 -16  -4   0    9.04    0.54
 -16  -4   0    9.12    0.59
 -16  -4   0    9.40    0.55
 -16  -4   0   10.82    1.08
 -16  -4   0   10.96    1.12
 -16  -4   0   11.18    1.54
 -16  -4   0   11.24    0.80
  15   4   0    4.66    0.85
  15   4   0    3.65    0.65
  15   4   0    4.26    0.56
  15   4   0    4.38    0.49
  15   4   0    3.29    0.66
  15   4   0    4.33    0.49
 -15  -4   0    3.97    0.29
 -15  -4   0    4.45    0.53
 -15  -4   0    3.56    0.63
 -15  -4   0    4.79    1.15
 -15  -4   0    3.58    0.34
 -15  -4   0    3.77    0.32
 -15  -4   0    3.74    0.63
 -15  -4   0    4.52    0.30
 -15  -4   0    3.52    0.34
 -15  -4   0    3.80    0.71
  14   4   0   34.69    2.20
  14   4   0   37.64    2.40
  14   4   0   38.65    2.08
  14   4   0   35.57    1.98
  14   4   0   36.92    2.00
  14   4   0   33.96    2.23
 -14  -4   0   36.41    1.84
 -14  -4   0   37.92    2.06
 -14  -4   0   36.49    1.85
 -14  -4   0   35.54    2.19
 -14  -4   0   35.29    2.25
 -14  -4   0   36.41    1.90
 -14  -4   0   36.57    1.88
 -14  -4   0   38.31    1.85
 -14  -4   0   39.97    2.90
 -14  -4   0   36.69    1.90
 -14  -4   0   33.12    2.17
  13   4   0    0.40    0.23
  13   4   0   -0.07    0.30
  13   4   0   -0.17    0.20
  13   4   0   -0.03    0.17
  13   4   0    0.04    0.36
  13   4   0    0.15    0.33
  13   4   0    0.18    0.26
  13   4   0    0.17    0.22
 -13  -4   0    0.14    0.28
 -13  -4   0   -0.08    0.32
 -13  -4   0    0.06    0.24
 -13  -4   0    0.21    0.29
 -13  -4   0    0.24    0.12
 -13  -4   0    0.07    0.15
 -13  -4   0    0.03    0.14
 -13  -4   0    0.16    0.11
 -13  -4   0    0.35    0.12
 -13  -4   0    0.25    0.46
 -13  -4   0    0.39    0.15
  12   4   0   95.97    5.26
  12   4   0   96.77    4.98
  12   4   0   95.14    5.10
  12   4   0   99.24    5.30
  12   4   0   98.52    4.92
  12   4   0   97.55    4.90
  12   4   0   93.94    4.94
  12   4   0   98.40    5.08
  12   4   0   95.37    5.15
  12   4   0   97.28    4.91
 -12  -4   0  108.14    4.97
 -12  -4   0  103.04    4.78
 -12  -4   0   99.59    5.72
 -12  -4   0   99.06    5.13
 -12  -4   0   97.23    4.82
 -12  -4   0   97.70    5.08
 -12  -4   0   99.66    4.83
 -12  -4   0  100.58    4.85
 -12  -4   0   97.52    4.86
 -12  -4   0  105.80    5.80
 -12  -4   0   93.65    5.15
 -12  -4   0   95.58    6.16
 -12  -4   0   97.64    5.00
 -12  -4   0   97.19    4.81
 -12  -4   0  101.32    4.88
  11   4   0    5.21    0.53
  11   4   0    4.72    0.43
  11   4   0    4.30    0.63
  11   4   0    4.98    0.46
  11   4   0    4.91    0.60
  11   4   0    4.19    0.71
  11   4   0    4.92    0.73
  11   4   0    4.83    0.42
  11   4   0    4.97    0.45
  11   4   0    6.35    0.72
  11   4   0    4.67    0.56
  11   4   0    6.00    0.77
 -11  -4   0    6.06    0.92
 -11  -4   0    4.98    0.37
 -11  -4   0    4.99    0.35
 -11  -4   0    5.52    1.22
 -11  -4   0    4.90    0.55
 -11  -4   0    4.58    0.38
 -11  -4   0    5.37    0.65
 -11  -4   0    5.51    0.37
 -11  -4   0    5.50    0.44
 -11  -4   0    5.13    0.62
 -11  -4   0    5.82    0.64
 -11  -4   0    5.21    0.41
 -11  -4   0    6.12    1.03
 -11  -4   0    5.22    0.68
 -11  -4   0    5.62    0.45
 -11  -4   0    5.03    0.37
 -11  -4   0    5.72    0.62
 -11  -4   0    5.11    0.39
  10   4   0   96.82    5.12
  10   4   0   98.45    5.89
  10   4   0   90.18    5.19
  10   4   0   99.75    5.06
  10   4   0   99.74    4.94
  10   4   0  101.92    5.16
  10   4   0  100.55    5.24
  10   4   0  102.03    4.96
  10   4   0   98.24    4.92
  10   4   0  106.00    4.98
  10   4   0   95.01    4.98
  10   4   0   86.42    5.23
  10   4   0   97.70    5.09
  10   4   0   98.22    5.39
  10   4   0   99.60    4.91
 -10  -4   0  100.98    5.00
 -10  -4   0  105.89    5.66
 -10  -4   0   96.44    4.85
 -10  -4   0   98.50    5.14
 -10  -4   0  105.32    4.96
 -10  -4   0  100.26    4.92
 -10  -4   0  105.74    4.88
 -10  -4   0  105.94    5.64
 -10  -4   0   98.78    5.10
 -10  -4   0   98.38    4.87
 -10  -4   0  100.32    5.05
 -10  -4   0  104.00    4.96
 -10  -4   0  101.06    4.90
 -10  -4   0  100.37    5.14
 -10  -4   0   94.26    4.87
 -10  -4   0   94.12    5.02
 -10  -4   0   94.57    5.93
 -10  -4   0  108.70    5.16
   9   4   0   83.52    5.07
   9   4   0   87.25    4.48
   9   4   0   91.84    4.42
   9   4   0   79.23    4.29
   9   4   0   82.70    4.60
   9   4   0   88.20    4.23
   9   4   0   80.21    4.32
   9   4   0   86.91    4.22
   9   4   0   84.04    4.18
   9   4   0   85.74    4.18
   9   4   0   76.36    4.48
   9   4   0   83.06    4.19
   9   4   0   85.58    4.24
   9   4   0   82.90    4.45
   9   4   0   82.65    4.37
  -9  -4   0   84.05    4.25
  -9  -4   0   77.01    4.28
  -9  -4   0   86.16    4.22
  -9  -4   0   85.51    4.19
  -9  -4   0   88.15    4.84
  -9  -4   0   88.26    4.80
  -9  -4   0   81.93    4.38
  -9  -4   0   89.55    4.15
  -9  -4   0   81.99    4.15
  -9  -4   0   87.09    4.39
  -9  -4   0   83.26    4.13
  -9  -4   0   87.16    4.41
  -9  -4   0   85.97    4.21
  -9  -4   0   84.65    4.35
  -9  -4   0   86.52    4.29
  -9  -4   0   81.93    4.15
  -9  -4   0   86.13    4.17
  -9  -4   0   83.48    5.12
   8   4   0   29.70    1.73
   8   4   0   31.48    1.66
   8   4   0   31.07    1.84
   8   4   0   28.92    1.70
   8   4   0   32.01    1.62
   8   4   0   29.10    2.31
   8   4   0   28.35    1.59
   8   4   0   32.01    1.60
   8   4   0   33.75    1.64
   8   4   0   30.26    1.77
   8   4   0   32.77    1.99
   8   4   0   33.07    1.65
   8   4   0   31.78    1.86
   8   4   0   30.95    1.79
   8   4   0   27.26    1.85
  -8  -4   0   33.28    2.16
  -8  -4   0   29.70    1.64
  -8  -4   0   31.78    1.82
  -8  -4   0   30.42    1.59
  -8  -4   0   32.16    1.58
  -8  -4   0   29.24    2.33
  -8  -4   0   30.20    1.61
  -8  -4   0   29.50    1.56
  -8  -4   0   29.62    1.78
  -8  -4   0   27.97    1.70
  -8  -4   0   33.56    1.65
  -8  -4   0   31.70    1.61
  -8  -4   0   32.74    1.70
  -8  -4   0   31.28    1.75
  -8  -4   0   30.47    1.67
  -8  -4   0   30.28    1.59
  -8  -4   0   31.96    1.79
  -8  -4   0   32.28    2.10
   7   4   0  106.78    5.16
   7   4   0  112.71    5.33
   7   4   0  109.03    5.52
   7   4   0  107.44    5.18
   7   4   0  104.45    5.37
   7   4   0   99.87    5.23
   7   4   0  101.94    5.36
   7   4   0  106.75    5.31
   7   4   0  105.27    5.19
   7   4   0  108.19    5.15
   7   4   0   99.73    5.26
   7   4   0  109.64    5.18
   7   4   0  102.17    5.89
   7   4   0   96.90    5.39
   7   4   0  101.78    5.14
   7   4   0  108.74    5.18
  -7  -4   0  102.87    5.16
  -7  -4   0   98.89    5.30
  -7  -4   0  101.34    5.14
  -7  -4   0  108.83    5.63
  -7  -4   0  115.26    5.14
  -7  -4   0  106.80    5.22
  -7  -4   0  109.44    5.71
  -7  -4   0   98.68    5.25
  -7  -4   0  105.30    5.15
  -7  -4   0  101.50    5.89
  -7  -4   0  106.87    5.32
  -7  -4   0  112.14    5.19
  -7  -4   0  112.44    5.23
  -7  -4   0  101.33    5.11
  -7  -4   0  107.57    5.29
  -7  -4   0   98.31    5.19
  -7  -4   0  105.08    5.36
   6   4   0    1.75    0.28
   6   4   0    1.98    0.23
   6   4   0    2.01    0.31
   6   4   0    1.81    0.38
   6   4   0    2.02    0.21
   6   4   0    1.97    0.32
   6   4   0    2.05    0.58
   6   4   0    1.77    0.19
   6   4   0    2.10    0.22
   6   4   0    1.74    0.35
   6   4   0    2.01    0.33
   6   4   0    1.47    0.33
   6   4   0    2.00    0.21
   6   4   0    1.82    0.21
   6   4   0    1.58    0.24
  -6  -4   0    1.76    0.32
  -6  -4   0    2.21    0.23
  -6  -4   0    1.64    0.41
  -6  -4   0    1.78    0.21
  -6  -4   0    2.04    0.18
  -6  -4   0    1.66    0.18
  -6  -4   0    1.61    0.20
  -6  -4   0    2.20    0.22
  -6  -4   0    1.68    0.23
  -6  -4   0    1.70    0.23
  -6  -4   0    1.87    0.46
  -6  -4   0    1.79    0.55
  -6  -4   0    2.41    0.32
  -6  -4   0    1.83    0.29
  -6  -4   0    2.17    0.33
  -6  -4   0    2.09    0.22
  -6  -4   0    1.99    0.25
  -6  -4   0    1.94    0.33
  -6  -4   0    1.61    0.28
   5   4   0  184.07    9.28
   5   4   0  187.09    9.03
   5   4   0  168.60    9.06
   5   4   0  187.03    9.02
   5   4   0  186.81    9.63
   5   4   0  190.44    9.02
   5   4   0  198.92    9.14
   5   4   0  185.12    9.00
   5   4   0  177.05    9.17
   5   4   0  193.10    9.02
   5   4   0  182.36    9.16
   5   4   0  190.67    9.00
   5   4   0  170.42    9.20
   5   4   0  171.03    9.08
   5   4   0  186.05    9.13
  -5  -4   0  197.33    9.04
  -5  -4   0  194.73    9.04
  -5  -4   0  184.13    9.02
  -5  -4   0  178.93    9.02
  -5  -4   0  184.95    9.15
  -5  -4   0  199.67    9.17
  -5  -4   0  188.06    9.14
  -5  -4   0  199.16    9.12
  -5  -4   0  185.09    8.99
  -5  -4   0  190.77    9.01
  -5  -4   0  170.88    9.10
  -5  -4   0  185.70    9.06
  -5  -4   0  184.68    9.47
  -5  -4   0  185.73    9.20
  -5  -4   0  197.87    9.03
  -5  -4   0  194.25    9.37
  -5  -4   0  185.27    9.02
   4   4   0    3.57    0.28
   4   4   0    4.10    0.27
   4   4   0    3.14    0.29
   4   4   0    3.49    0.32
   4   4   0    3.63    0.36
   4   4   0    3.11    0.38
   4   4   0    3.67    0.25
   4   4   0    3.32    0.42
   4   4   0    4.18    0.36
   4   4   0    4.11    0.44
   4   4   0    2.78    0.50
   4   4   0    3.47    0.37
   4   4   0    3.75    0.26
   4   4   0    4.19    0.27
   4   4   0    3.82    0.66
   4   4   0    3.79    0.26
   4   4   0    3.48    0.26
  -4  -4   0    3.64    0.26
  -4  -4   0    3.46    0.24
  -4  -4   0    3.29    0.28
  -4  -4   0    3.88    0.54
  -4  -4   0    4.12    0.35
  -4  -4   0    3.75    0.35
  -4  -4   0    3.42    0.26
  -4  -4   0    4.01    0.26
  -4  -4   0    3.61    0.40
  -4  -4   0    3.30    0.26
  -4  -4   0    3.87    0.27
  -4  -4   0    4.75    0.37
  -4  -4   0    3.68    0.33
  -4  -4   0    3.80    0.26
  -4  -4   0    3.51    0.27
  -4  -4   0    3.65    0.34
  -4  -4   0    3.53    0.49
   3   4   0   33.61    1.63
   3   4   0   32.53    1.61
   3   4   0   30.10    1.65
   3   4   0   32.84    1.63
   3   4   0   32.79    1.70
   3   4   0   32.60    1.61
   3   4   0   30.89    1.67
   3   4   0   34.62    1.62
   3   4   0   30.16    1.63
   3   4   0   31.27    2.02
   3   4   0   33.99    1.60
   3   4   0   32.60    1.70
   3   4   0   32.78    1.63
   3   4   0   32.13    1.72
   3   4   0   33.12    1.74
   3   4   0   32.34    1.78
  -3  -4   0   31.41    1.71
  -3  -4   0   36.26    1.61
  -3  -4   0   32.81    1.63
  -3  -4   0   33.17    1.63
  -3  -4   0   31.22    1.63
  -3  -4   0   31.68    1.71
  -3  -4   0   33.87    1.72
  -3  -4   0   34.58    1.63
  -3  -4   0   26.47    1.94
  -3  -4   0   31.30    1.65
  -3  -4   0   32.78    1.62
  -3  -4   0   32.15    1.61
  -3  -4   0   32.48    2.00
  -3  -4   0   30.72    1.77
  -3  -4   0   32.01    1.68
  -3  -4   0   35.15    1.72
  -3  -4   0   31.42    1.63
  -3  -4   0   33.35    1.85
   2   4   0  112.59    5.34
   2   4   0  109.17    5.33
   2   4   0  112.26    5.70
   2   4   0  110.05    5.31
   2   4   0  108.85    5.32
   2   4   0  108.99    5.32
   2   4   0  104.39    5.41
   2   4   0  104.47    5.42
   2   4   0  105.69    5.37
   2   4   0  113.89    5.39
   2   4   0  119.32    5.42
   2   4   0  117.88    5.35
   2   4   0  113.99    5.34
   2   4   0  112.89    5.32
   2   4   0  105.53    5.33
   2   4   0  108.94    5.47
   2   4   0  103.21    5.34
   2   4   0  113.25    5.40
  -2  -4   0  106.70    5.65
  -2  -4   0  120.29    5.43
  -2  -4   0  110.32    5.36
  -2  -4   0  106.89    5.48
  -2  -4   0  100.15    5.33
  -2  -4   0  106.87    5.32
  -2  -4   0  110.41    5.34
  -2  -4   0  113.47    5.33
  -2  -4   0  102.95    5.34
  -2  -4   0  114.76    5.52
  -2  -4   0  112.58    5.34
  -2  -4   0  112.38    5.38
  -2  -4   0  106.17    5.41
  -2  -4   0  118.82    5.41
  -2  -4   0  108.14    5.33
  -2  -4   0  109.83    5.41
   1   4   0   33.54    1.65
   1   4   0   36.43    1.71
   1   4   0   33.54    1.92
   1   4   0   32.92    1.76
   1   4   0   30.88    1.65
   1   4   0   32.29    1.76
   1   4   0   36.85    1.66
   1   4   0   32.17    1.71
   1   4   0   31.64    1.62
   1   4   0   34.00    1.70
   1   4   0   35.51    1.64
   1   4   0   32.39    1.70
   1   4   0   31.04    1.66
   1   4   0   30.50    1.63
   1   4   0   35.60    1.65
   1   4   0   31.24    1.67
  -1  -4   0   32.97    1.71
  -1  -4   0   32.58    1.65
  -1  -4   0   32.03    1.65
  -1  -4   0   36.66    1.68
  -1  -4   0   33.56    1.63
  -1  -4   0   34.23    1.70
  -1  -4   0   30.78    1.64
  -1  -4   0   33.14    1.78
  -1  -4   0   35.85    1.91
  -1  -4   0   31.97    1.66
  -1  -4   0   32.81    1.65
  -1  -4   0   32.65    1.63
  -1  -4   0   35.95    1.71
  -1  -4   0   31.64    1.76
  -1  -4   0   32.07    1.64
  -1  -4   0   33.40    1.64
   0   4   0  872.95   42.21
   0   4   0  876.91   42.21
   0   4   0  888.21   42.17
   0   4   0  896.97   42.51
   0   4   0  889.50   42.56
   0   4   0  886.15   43.33
   0   4   0  877.14   42.74
   0   4   0  748.14   42.21
   0   4   0  894.07   42.46
   0   4   0  872.84   42.41
   0   4   0  877.72   42.23
   0   4   0  868.06   42.27
   0   4   0  876.00   42.34
   0   4   0  876.58   42.63
   0   4   0  910.42   42.94
   0   4   0  881.67   42.17
   0  -4   0  892.85   42.24
   0  -4   0  903.83   42.64
   0  -4   0  942.80   42.54
   0  -4   0  828.01   42.26
   0  -4   0  837.88   42.57
   0  -4   0  851.65   42.28
   0  -4   0  962.22   43.40
   0  -4   0 1000.00   42.58
   0  -4   0  757.58   42.59
   0  -4   0  861.09   42.24
   0  -4   0  840.37   42.28
   0  -4   0  945.98   42.17
   0  -4   0  903.23   42.40
   0  -4   0  764.90   42.52
   0  -4   0  911.39   42.40
   0  -4   0  862.60   42.28
  -1   4   0   32.35    1.69
  -1   4   0   34.46    1.78
  -1   4   0   33.70    1.72
  -1   4   0   34.45    1.87
  -1   4   0   31.91    1.67
  -1   4   0   33.13    1.67
  -1   4   0   33.91    1.72
  -1   4   0   37.36    1.74
  -1   4   0   34.99    1.67
  -1   4   0   36.99    1.77
  -1   4   0   37.18    1.72
  -1   4   0   34.61    1.66
  -1   4   0   32.73    1.66
  -1   4   0   33.91    1.73
  -1   4   0   34.00    1.70
  -1   4   0   33.71    1.66
  -1   4   0   34.17    1.65
  -1   4   0   32.67    1.69
  -1   4   0   32.44    1.67
   1  -4   0   33.18    1.72
   1  -4   0   33.34    1.67
   1  -4   0   33.37    1.69
   1  -4   0   35.51    1.67
   1  -4   0   34.30    1.68
   1  -4   0   33.91    1.72
   1  -4   0   33.76    1.68
   1  -4   0   34.85    1.73
   1  -4   0   34.11    1.78
   1  -4   0   33.95    1.78
   1  -4   0   37.52    1.72
   1  -4   0   33.50    1.69
   1  -4   0   32.44    1.72
   1  -4   0   32.36    1.83
   1  -4   0   32.69    1.68
   1  -4   0   34.69    1.68
   1  -4   0   33.70    1.68
   1  -4   0   35.81    1.66
  -2   4   0  115.14    5.52
  -2   4   0  108.35    5.56
  -2   4   0  108.53    5.56
  -2   4   0  129.15    5.59
  -2   4   0  108.15    5.56
  -2   4   0  110.49    5.55
  -2   4   0  114.16    5.53
  -2   4   0  120.33    5.57
  -2   4   0  119.09    5.74
  -2   4   0  110.28    5.60
  -2   4   0  110.03    5.56
  -2   4   0  130.61    5.63
  -2   4   0  114.11    5.59
  -2   4   0  118.70    5.62
  -2   4   0  118.35    5.57
  -2   4   0  111.71    5.59
  -2   4   0  109.43    5.65
  -2   4   0  111.28    5.54
   2  -4   0  108.07    5.54
   2  -4   0  108.14    5.55
   2  -4   0  123.06    5.65
   2  -4   0  109.92    5.64
   2  -4   0  115.12    5.59
   2  -4   0  112.49    5.60
   2  -4   0  111.15    5.54
   2  -4   0  117.41    5.58
   2  -4   0  110.92    5.54
   2  -4   0  117.55    5.59
   2  -4   0  113.14    5.55
   2  -4   0  114.74    5.72
   2  -4   0  119.46    5.53
   2  -4   0  123.97    5.59
   2  -4   0  120.24    5.61
   2  -4   0  113.47    5.55
   2  -4   0  117.42    5.56
  -3   4   0   35.38    1.90
  -3   4   0   31.95    1.68
  -3   4   0   35.68    1.77
  -3   4   0   33.99    1.71
  -3   4   0   33.89    1.74
  -3   4   0   38.11    1.80
  -3   4   0   33.30    1.69
  -3   4   0   34.95    1.74
  -3   4   0   34.57    1.69
  -3   4   0   34.30    1.83
  -3   4   0   34.88    1.72
  -3   4   0   34.59    1.77
  -3   4   0   34.25    1.74
  -3   4   0   35.81    1.73
  -3   4   0   33.21    1.70
  -3   4   0   33.97    1.71
  -3   4   0   33.58    1.68
  -3   4   0   33.98    1.68
   3  -4   0   34.19    1.70
   3  -4   0   34.06    1.72
   3  -4   0   36.18    1.68
   3  -4   0   33.78    1.70
   3  -4   0   33.30    1.81
   3  -4   0   34.65    1.71
   3  -4   0   36.48    1.78
   3  -4   0   34.31    1.69
   3  -4   0   32.71    1.76
   3  -4   0   35.65    1.80
   3  -4   0   33.23    1.70
   3  -4   0   33.81    1.88
   3  -4   0   36.64    1.75
   3  -4   0   33.75    1.70
   3  -4   0   35.27    1.72
   3  -4   0   35.22    1.74
  -4   4   0    3.70    0.22
  -4   4   0    4.50    0.30
  -4   4   0    4.02    0.25
  -4   4   0    3.71    0.23
  -4   4   0    3.54    0.26
  -4   4   0    3.57    0.29
  -4   4   0    3.51    0.22
  -4   4   0    4.08    0.44
  -4   4   0    3.81    0.23
  -4   4   0    3.94    0.28
  -4   4   0    4.09    0.32
  -4   4   0    3.81    0.26
  -4   4   0    3.93    0.22
  -4   4   0    4.55    0.36
  -4   4   0    4.01    0.28
  -4   4   0    3.85    0.22
  -4   4   0    3.87    0.33
  -4   4   0    3.75    0.26
   4  -4   0    3.86    0.31
   4  -4   0    3.80    0.32
   4  -4   0    3.89    0.23
   4  -4   0    4.08    0.24
   4  -4   0    3.99    0.24
   4  -4   0    3.96    0.30
   4  -4   0    3.69    0.34
   4  -4   0    3.53    0.41
   4  -4   0    4.10    0.29
   4  -4   0    4.07    0.26
   4  -4   0    3.88    0.26
   4  -4   0    4.39    0.37
   4  -4   0    3.92    0.21
   4  -4   0    3.99    0.25
   4  -4   0    4.18    0.24
   4  -4   0    4.10    0.27
   4  -4   0    4.09    0.34
   4  -4   0    3.98    0.24
  -5   4   0  194.70    9.55
  -5   4   0  203.84    9.49
  -5   4   0  201.16    9.72
  -5   4   0  194.99    9.49
  -5   4   0  189.24    9.46
  -5   4   0  190.54    9.53
  -5   4   0  195.62    9.48
  -5   4   0  203.79    9.46
  -5   4   0  202.27    9.51
  -5   4   0  199.21    9.43
  -5   4   0  191.49    9.47
  -5   4   0  198.37    9.44
  -5   4   0  190.12    9.44
  -5   4   0  185.72    9.46
  -5   4   0  189.21    9.47
  -5   4   0  187.79    9.49
  -5   4   0  191.85    9.44
  -5   4   0  191.01    9.58
   5  -4   0  196.40    9.46
   5  -4   0  202.72    9.51
   5  -4   0  198.88    9.47
   5  -4   0  199.46    9.46
   5  -4   0  197.48    9.48
   5  -4   0  185.95    9.59
   5  -4   0  192.41    9.50
   5  -4   0  192.65    9.57
   5  -4   0  198.09    9.51
   5  -4   0  197.64    9.55
   5  -4   0  196.71    9.53
   5  -4   0  189.20    9.43
   5  -4   0  191.17    9.52
   5  -4   0  205.39    9.44
   5  -4   0  206.06    9.55
   5  -4   0  212.65    9.54
   5  -4   0  192.45    9.71
  -6   4   0    1.90    0.14
  -6   4   0    2.71    0.28
  -6   4   0    1.93    0.15
  -6   4   0    2.01    0.33
  -6   4   0    2.11    0.14
  -6   4   0    2.08    0.20
  -6   4   0    2.70    0.56
  -6   4   0    2.04    0.14
  -6   4   0    2.32    0.16
  -6   4   0    1.88    0.27
  -6   4   0    2.37    0.22
  -6   4   0    1.73    0.27
  -6   4   0    1.96    0.21
  -6   4   0    2.06    0.25
  -6   4   0    2.16    0.17
  -6   4   0    2.16    0.40
  -6   4   0    2.10    0.22
  -6   4   0    1.94    0.14
   6  -4   0    2.33    0.18
   6  -4   0    2.16    0.22
   6  -4   0    2.17    0.32
   6  -4   0    2.36    0.25
   6  -4   0    2.15    0.23
   6  -4   0    2.23    0.41
   6  -4   0    2.03    0.31
   6  -4   0    2.42    0.30
   6  -4   0    2.22    0.19
   6  -4   0    2.24    0.18
   6  -4   0    2.56    0.32
   6  -4   0    1.93    0.19
   6  -4   0    2.01    0.16
   6  -4   0    2.10    0.19
   6  -4   0    1.88    0.27
   6  -4   0    1.78    0.16
   6  -4   0    1.88    0.25
  -7   4   0  102.38    5.43
  -7   4   0  115.34    5.45
  -7   4   0  111.85    5.37
  -7   4   0  111.31    5.47
  -7   4   0  105.37    5.35
  -7   4   0  104.16    5.51
  -7   4   0  108.50    5.35
  -7   4   0  107.97    5.48
  -7   4   0  108.05    5.35
  -7   4   0  118.03    5.40
  -7   4   0  116.31    5.78
  -7   4   0  106.71    5.42
  -7   4   0  111.72    5.35
  -7   4   0  102.88    5.52
  -7   4   0  119.37    6.06
  -7   4   0  108.77    5.35
   7  -4   0  114.58    5.40
   7  -4   0  108.99    5.55
   7  -4   0  112.12    5.40
   7  -4   0  117.60    5.45
   7  -4   0  109.46    5.52
   7  -4   0  110.53    5.53
   7  -4   0  113.04    5.41
   7  -4   0  113.45    5.50
   7  -4   0  112.72    5.42
   7  -4   0  112.86    5.58
   7  -4   0  119.02    5.52
   7  -4   0  106.75    5.42
   7  -4   0  112.23    5.38
  -8   4   0   33.34    1.58
  -8   4   0   35.62    1.71
  -8   4   0   31.43    1.58
  -8   4   0   33.72    2.05
  -8   4   0   30.63    1.67
  -8   4   0   31.49    1.58
  -8   4   0   33.01    1.74
  -8   4   0   30.88    1.71
  -8   4   0   30.89    2.27
  -8   4   0   31.28    1.78
  -8   4   0   31.84    1.58
  -8   4   0   34.98    1.64
  -8   4   0   31.38    1.68
  -8   4   0   31.81    1.59
  -8   4   0   30.68    1.78
   8  -4   0   32.70    1.66
   8  -4   0   33.04    1.85
   8  -4   0   31.40    1.77
   8  -4   0   31.65    1.63
   8  -4   0   32.97    1.65
   8  -4   0   32.29    1.82
   8  -4   0   31.11    1.67
   8  -4   0   35.02    1.80
   8  -4   0   31.52    1.65
   8  -4   0   33.39    1.70
   8  -4   0   31.46    1.75
   8  -4   0   32.97    1.80
   8  -4   0   32.21    1.68
  -9   4   0   89.69    4.26
  -9   4   0   83.93    4.50
  -9   4   0   94.82    4.42
  -9   4   0   90.65    4.46
  -9   4   0   89.68    4.26
  -9   4   0   81.79    4.49
  -9   4   0   93.73    4.34
  -9   4   0   83.92    4.25
  -9   4   0   85.34    4.34
  -9   4   0   86.13    4.80
  -9   4   0   87.18    4.38
  -9   4   0   86.00    5.15
  -9   4   0   88.50    4.28
   9  -4   0   83.76    4.36
   9  -4   0   84.30    4.51
   9  -4   0   88.00    4.36
   9  -4   0   86.51    4.58
   9  -4   0   88.34    4.39
   9  -4   0   89.06    4.39
   9  -4   0   89.66    4.52
   9  -4   0   93.33    4.37
   9  -4   0   92.32    4.34
   9  -4   0   88.19    4.52
   9  -4   0   86.63    4.48
   9  -4   0   94.17    4.57
   9  -4   0   96.42    4.44
 -10   4   0  105.16    5.09
 -10   4   0   98.96    5.22
 -10   4   0  102.28    5.37
 -10   4   0   94.60    5.93
 -10   4   0  111.97    5.12
 -10   4   0  102.26    5.58
 -10   4   0  102.25    5.17
 -10   4   0  102.38    4.96
 -10   4   0  108.87    5.03
 -10   4   0  105.55    5.30
  10  -4   0  103.51    5.10
  10  -4   0   99.58    5.26
  10  -4   0   96.75    5.07
  10  -4   0  104.92    5.04
  10  -4   0  101.49    5.26
  10  -4   0  101.98    5.06
  10  -4   0  104.01    5.10
  10  -4   0   96.06    5.23
  10  -4   0  104.85    5.33
  10  -4   0  101.33    5.19
  10  -4   0  105.52    5.07
 -11   4   0    3.35    0.98
 -11   4   0    4.79    0.46
 -11   4   0    5.42    0.56
 -11   4   0    5.08    0.43
 -11   4   0    4.53    0.82
 -11   4   0    4.78    0.64
 -11   4   0    4.83    0.59
  11  -4   0    5.67    0.65
  11  -4   0    6.05    0.47
  11  -4   0    4.40    0.42
  11  -4   0    4.98    0.41
  11  -4   0    4.44    0.62
  11  -4   0    4.49    0.61
  11  -4   0    5.09    0.66
  11  -4   0    5.35    0.39
  11  -4   0    5.32    0.42
  11  -4   0    5.58    0.60
 -12   4   0   95.90    5.13
 -12   4   0  105.35    4.98
 -12   4   0   95.81    6.08
 -12   4   0  103.29    5.08
 -12   4   0  102.27    5.60
 -12   4   0  103.29    5.24
  12  -4   0  101.96    5.21
  12  -4   0  102.79    4.95
  12  -4   0  102.42    5.28
  12  -4   0   91.23    5.15
  12  -4   0   98.07    4.99
  12  -4   0   94.47    5.00
  12  -4   0   90.62    5.19
  12  -4   0  103.73    5.13
  12  -4   0  102.32    4.93
 -13   4   0    0.11    0.28
 -13   4   0    0.12    0.24
 -13   4   0    0.42    0.46
 -13   4   0   -0.54    0.42
 -13   4   0   -0.07    0.27
 -13   4   0    0.03    0.17
  13  -4   0    0.30    0.32
  13  -4   0    0.51    0.30
  13  -4   0    0.07    0.31
  13  -4   0    0.23    0.18
  13  -4   0    0.09    0.15
  13  -4   0    0.57    0.33
  13  -4   0    0.51    0.23
 -14   4   0   39.35    2.19
 -14   4   0   41.43    2.80
 -14   4   0   36.45    2.25
 -14   4   0   42.40    2.19
 -14   4   0   38.32    2.37
  14  -4   0   41.81    2.27
  14  -4   0   30.15    2.22
  14  -4   0   37.18    2.31
  14  -4   0   37.71    2.03
  14  -4   0   37.81    2.02
  14  -4   0   38.18    2.09
  14  -4   0   35.84    2.39
 -15   4   0    2.95    0.60
 -15   4   0    4.48    0.45
 -15   4   0    4.13    0.74
 -15   4   0    4.74    0.63
  15  -4   0    3.88    0.45
  15  -4   0    4.73    0.56
  15  -4   0    4.67    0.67
  15  -4   0    5.35    0.51
  15  -4   0    3.81    0.68
 -16   4   0   10.51    1.22
 -16   4   0    9.03    1.03
 -16   4   0   10.81    0.94
 -16   4   0   10.34    0.71
  16  -4   0   10.94    0.84
  16  -4   0   10.46    1.23
  16  -4   0   10.93    0.79
  16  -4   0   11.55    1.14
 -17   4   0   17.78    1.54
 -17   4   0   17.57    1.29
 -17   4   0   16.26    1.34
 -17   4   0   16.24    1.01
  17  -4   0   15.40    1.15
  17  -4   0   19.09    1.14
  17  -4   0   19.59    1.40
 -18   4   0   -0.58    0.32
 -18   4   0    0.74    0.55
 -18   4   0    0.04    0.36
  18  -4   0    0.68    0.33
  18  -4   0    0.58    0.48
  18  -4   0   -0.44    0.25
  18   5   0    5.79    0.69
  18   5   0    4.00    0.59
  18   5   0    6.36    0.93
  18   5   0    6.19    1.08
  18   5   0    5.83    0.67
 -18  -5   0    5.46    1.39
 -18  -5   0    5.54    0.92
 -18  -5   0    5.89    0.64
  17   5   0    0.40    0.32
  17   5   0    0.87    0.34
  17   5   0   -0.37    0.43
  17   5   0    0.59    0.45
  17   5   0   -0.41    0.40
  17   5   0    0.37    0.30
 -17  -5   0   -0.43    0.39
 -17  -5   0   -0.09    0.59
 -17  -5   0    0.13    0.28
 -17  -5   0   -0.08    0.10
 -17  -5   0    0.21    0.10
 -17  -5   0    0.22    0.15
  16   5   0    5.16    0.63
  16   5   0    3.64    0.72
  16   5   0    3.87    0.50
  16   5   0    4.33    0.52
  16   5   0    5.25    0.79
  16   5   0    5.45    0.96
 -16  -5   0    5.45    0.84
 -16  -5   0    3.77    0.34
 -16  -5   0    3.75    0.30
 -16  -5   0    4.21    0.29
 -16  -5   0    4.90    0.58
 -16  -5   0    3.29    0.31
 -16  -5   0    4.46    1.16
 -16  -5   0    3.99    0.69
 -16  -5   0    3.66    0.35
  15   5   0   18.31    1.23
  15   5   0   18.26    1.45
  15   5   0   19.69    1.52
  15   5   0   19.76    1.31
  15   5   0   19.66    1.25
  15   5   0   19.98    1.65
 -15  -5   0   21.19    1.08
 -15  -5   0   20.04    1.31
 -15  -5   0   21.65    1.09
 -15  -5   0   20.97    1.14
 -15  -5   0   19.55    1.47
 -15  -5   0   20.84    1.14
 -15  -5   0   21.19    1.14
 -15  -5   0   21.86    2.14
 -15  -5   0   20.59    1.08
 -15  -5   0   17.82    1.40
 -15  -5   0   22.79    1.58
  14   5   0    0.77    0.42
  14   5   0    0.74    0.26
  14   5   0    0.91    0.31
  14   5   0    1.25    0.41
  14   5   0    1.09    0.51
  14   5   0    1.11    0.28
 -14  -5   0    0.83    0.17
 -14  -5   0    0.60    0.42
 -14  -5   0    1.25    0.36
 -14  -5   0    0.90    0.65
 -14  -5   0    1.05    0.22
 -14  -5   0    1.07    0.17
 -14  -5   0    0.38    0.34
 -14  -5   0    0.97    0.37
 -14  -5   0    0.95    0.16
 -14  -5   0    1.21    0.20
 -14  -5   0    1.03    0.21
  13   5   0   13.65    0.91
  13   5   0   13.56    1.10
  13   5   0   14.60    0.93
  13   5   0   12.90    1.13
  13   5   0   14.01    0.94
  13   5   0   14.31    0.98
  13   5   0   14.97    1.29
 -13  -5   0   14.90    0.81
 -13  -5   0   15.46    0.86
 -13  -5   0   13.69    1.16
 -13  -5   0   15.41    1.60
 -13  -5   0   12.79    1.09
 -13  -5   0   13.71    0.79
 -13  -5   0   14.07    0.86
 -13  -5   0   14.79    0.81
 -13  -5   0   14.95    0.84
 -13  -5   0   14.66    0.75
 -13  -5   0   15.84    1.04
 -13  -5   0   14.05    1.05
  12   5   0    0.35    0.25
  12   5   0    0.88    0.36
  12   5   0    0.75    0.25
  12   5   0    0.82    0.22
  12   5   0    0.38    0.43
  12   5   0    1.28    0.34
  12   5   0    0.58    0.35
  12   5   0    0.75    0.39
  12   5   0    0.80    0.24
  12   5   0    0.37    0.19
 -12  -5   0    0.66    0.19
 -12  -5   0    0.40    0.29
 -12  -5   0    1.04    0.32
 -12  -5   0    0.66    0.15
 -12  -5   0    0.72    0.17
 -12  -5   0    0.77    0.52
 -12  -5   0    0.58    0.18
 -12  -5   0    0.64    0.32
 -12  -5   0    0.47    0.37
 -12  -5   0    0.62    0.18
 -12  -5   0    0.74    0.16
  11   5   0   51.25    2.67
  11   5   0   56.45    2.97
  11   5   0   48.13    2.68
  11   5   0   51.80    2.71
  11   5   0   48.58    2.89
  11   5   0   48.77    3.00
  11   5   0   44.02    3.02
  11   5   0   51.35    3.02
  11   5   0   51.57    2.83
  11   5   0   46.26    2.84
  11   5   0   54.58    2.75
  11   5   0   54.48    2.76
  11   5   0   53.09    2.68
 -11  -5   0   52.86    2.82
 -11  -5   0   51.28    2.63
 -11  -5   0   52.84    2.65
 -11  -5   0   51.07    2.80
 -11  -5   0   53.29    2.63
 -11  -5   0   54.24    2.92
 -11  -5   0   53.09    2.71
 -11  -5   0   53.93    2.72
 -11  -5   0   55.47    2.89
 -11  -5   0   55.28    3.45
 -11  -5   0   55.31    2.63
 -11  -5   0   57.04    2.96
 -11  -5   0   48.27    3.71
 -11  -5   0   53.02    2.95
 -11  -5   0   55.87    3.46
 -11  -5   0   50.69    2.65
 -11  -5   0   52.46    2.60
 -11  -5   0   54.06    2.68
  10   5   0   23.70    1.52
  10   5   0   24.11    1.54
  10   5   0   22.59    1.43
  10   5   0   24.65    1.36
  10   5   0   23.41    1.30
  10   5   0   23.30    1.59
  10   5   0   21.27    1.63
  10   5   0   26.19    1.78
  10   5   0   23.93    1.33
  10   5   0   23.84    1.31
  10   5   0   23.20    2.18
  10   5   0   25.89    1.64
  10   5   0   21.56    1.46
  10   5   0   24.31    1.35
  10   5   0   23.71    1.38
 -10  -5   0   26.45    1.98
 -10  -5   0   25.06    1.30
 -10  -5   0   21.92    1.43
 -10  -5   0   24.56    1.34
 -10  -5   0   26.28    1.28
 -10  -5   0   24.03    1.91
 -10  -5   0   21.63    1.28
 -10  -5   0   23.29    1.28
 -10  -5   0   26.59    1.55
 -10  -5   0   24.71    1.55
 -10  -5   0   23.41    1.41
 -10  -5   0   25.92    1.32
 -10  -5   0   25.54    1.40
 -10  -5   0   23.83    1.35
 -10  -5   0   23.74    1.25
 -10  -5   0   23.61    1.28
 -10  -5   0   20.61    1.49
 -10  -5   0   26.11    1.51
 -10  -5   0   21.91    2.14
   9   5   0    3.17    0.52
   9   5   0    2.60    0.39
   9   5   0    3.76    0.94
   9   5   0    2.43    0.41
   9   5   0    2.82    0.30
   9   5   0    2.66    0.47
   9   5   0    3.35    0.57
   9   5   0    3.31    0.55
   9   5   0    3.09    0.34
   9   5   0    3.29    0.62
   9   5   0    2.87    0.32
   9   5   0    3.21    0.36
   9   5   0    3.44    0.51
   9   5   0    3.13    0.31
   9   5   0    3.23    0.38
  -9  -5   0    3.63    0.68
  -9  -5   0    2.90    0.30
  -9  -5   0    3.02    0.50
  -9  -5   0    3.31    0.46
  -9  -5   0    3.10    0.29
  -9  -5   0    2.73    0.30
  -9  -5   0    3.16    0.71
  -9  -5   0    3.10    0.27
  -9  -5   0    2.91    0.38
  -9  -5   0    2.99    0.48
  -9  -5   0    3.10    0.43
  -9  -5   0    2.55    0.42
  -9  -5   0    3.65    0.40
  -9  -5   0    3.09    0.26
  -9  -5   0    3.11    0.31
  -9  -5   0    3.13    0.34
  -9  -5   0    3.24    0.89
  -9  -5   0    3.35    0.37
   8   5   0   73.13    4.57
   8   5   0   75.49    3.72
   8   5   0   71.05    3.83
   8   5   0   71.10    3.81
   8   5   0   74.61    4.11
   8   5   0   79.72    3.75
   8   5   0   81.29    3.93
   8   5   0   71.09    3.69
   8   5   0   77.06    3.76
   8   5   0   73.23    3.88
   8   5   0   78.48    3.73
   8   5   0   74.34    3.96
   8   5   0   64.70    3.97
   8   5   0   74.72    3.70
   8   5   0   69.44    3.95
  -8  -5   0   72.58    3.71
  -8  -5   0   76.23    4.33
  -8  -5   0   75.11    3.77
  -8  -5   0   75.70    3.70
  -8  -5   0   75.86    3.96
  -8  -5   0   74.55    3.70
  -8  -5   0   69.37    4.51
  -8  -5   0   73.80    3.66
  -8  -5   0   77.14    4.27
  -8  -5   0   82.96    3.70
  -8  -5   0   69.88    3.83
  -8  -5   0   78.29    3.87
  -8  -5   0   71.48    3.76
  -8  -5   0   78.55    3.91
  -8  -5   0   73.50    3.73
  -8  -5   0   76.35    3.92
  -8  -5   0   76.08    3.78
   7   5   0   15.38    0.96
   7   5   0   13.35    1.01
   7   5   0   13.79    0.89
   7   5   0   13.66    1.42
   7   5   0   13.13    1.04
   7   5   0   14.29    0.97
   7   5   0   13.57    0.91
   7   5   0   14.39    0.80
   7   5   0   14.52    0.82
   7   5   0   14.79    0.81
   7   5   0   14.29    1.00
   7   5   0   14.61    0.85
   7   5   0   14.04    1.11
   7   5   0   13.97    0.81
   7   5   0   15.80    0.85
   7   5   0   14.62    0.83
  -7  -5   0   14.26    0.87
  -7  -5   0   14.40    0.78
  -7  -5   0   12.95    1.36
  -7  -5   0   13.75    0.81
  -7  -5   0   15.18    0.80
  -7  -5   0   13.76    1.19
  -7  -5   0   12.87    0.85
  -7  -5   0   14.76    0.84
  -7  -5   0   14.51    1.26
  -7  -5   0   14.42    1.02
  -7  -5   0   13.75    0.93
  -7  -5   0   14.17    0.97
  -7  -5   0   14.19    0.81
  -7  -5   0   15.00    0.86
  -7  -5   0   14.67    0.93
  -7  -5   0   14.53    0.82
  -7  -5   0   14.32    0.96
  -7  -5   0   14.79    0.82
   6   5   0   46.25    2.30
   6   5   0   45.33    2.41
   6   5   0   46.65    2.29
   6   5   0   43.55    2.45
   6   5   0   43.65    2.27
   6   5   0   47.18    2.29
   6   5   0   46.58    2.43
   6   5   0   46.48    2.28
   6   5   0   41.61    2.46
   6   5   0   46.50    2.59
   6   5   0   44.84    2.26
   6   5   0   44.19    2.95
   6   5   0   41.76    2.51
   6   5   0   40.64    2.34
   6   5   0   43.09    2.37
  -6  -5   0   44.24    2.29
  -6  -5   0   47.37    2.31
  -6  -5   0   45.73    2.29
  -6  -5   0   48.46    2.31
  -6  -5   0   46.77    2.81
  -6  -5   0   44.72    2.25
  -6  -5   0   47.59    2.27
  -6  -5   0   42.43    2.42
  -6  -5   0   41.74    2.39
  -6  -5   0   46.23    2.34
  -6  -5   0   46.19    2.29
  -6  -5   0   45.91    2.39
  -6  -5   0   46.65    2.29
  -6  -5   0   45.49    2.50
  -6  -5   0   46.01    2.43
  -6  -5   0   47.43    2.70
   5   5   0   -0.06    0.12
   5   5   0   -0.03    0.08
   5   5   0    0.18    0.30
   5   5   0   -0.02    0.14
   5   5   0    0.08    0.09
   5   5   0    0.09    0.19
   5   5   0   -0.05    0.09
   5   5   0   -0.12    0.16
   5   5   0    0.02    0.09
   5   5   0    0.06    0.14
   5   5   0   -0.05    0.08
   5   5   0    0.08    0.13
   5   5   0   -0.03    0.11
   5   5   0   -0.03    0.07
   5   5   0    0.11    0.15
  -5  -5   0    0.40    0.19
  -5  -5   0   -0.10    0.08
  -5  -5   0    0.11    0.13
  -5  -5   0    0.14    0.09
  -5  -5   0    0.05    0.10
  -5  -5   0   -0.03    0.12
  -5  -5   0    0.02    0.08
  -5  -5   0   -0.08    0.14
  -5  -5   0    0.14    0.09
  -5  -5   0    0.06    0.22
  -5  -5   0   -0.02    0.07
  -5  -5   0    0.12    0.22
  -5  -5   0    0.32    0.20
  -5  -5   0    0.01    0.08
  -5  -5   0   -0.16    0.16
  -5  -5   0    0.08    0.14
  -5  -5   0    0.11    0.10
  -5  -5   0    0.08    0.08
   4   5   0  151.00    7.66
   4   5   0  143.37    7.66
   4   5   0  155.31    7.51
   4   5   0  162.65    7.54
   4   5   0  158.28    7.53
   4   5   0  178.14    7.50
   4   5   0  142.71    7.59
   4   5   0  139.14    7.71
   4   5   0  152.26    7.52
   4   5   0  141.51    7.54
   4   5   0  150.03    7.58
   4   5   0  159.07    7.78
   4   5   0  169.72    7.65
   4   5   0  156.80    7.53
   4   5   0  152.00    7.51
   4   5   0  148.22    8.07
   4   5   0  163.10    7.63
  -4  -5   0  162.04    7.54
  -4  -5   0  163.87    7.61
  -4  -5   0  152.15    8.05
  -4  -5   0  161.64    7.52
  -4  -5   0  150.82    7.73
  -4  -5   0  168.62    7.67
  -4  -5   0  144.01    7.63
  -4  -5   0  157.26    7.84
  -4  -5   0  169.46    7.51
  -4  -5   0  172.11    7.68
  -4  -5   0  158.41    7.54
  -4  -5   0  146.23    7.54
  -4  -5   0  135.19    7.98
  -4  -5   0  161.42    7.67
  -4  -5   0  146.97    7.50
  -4  -5   0  153.50    7.54
  -4  -5   0  158.57    7.54
  -4  -5   0  150.22    7.56
   3   5   0   52.93    2.63
   3   5   0   52.93    2.71
   3   5   0   50.95    2.64
   3   5   0   51.59    2.61
   3   5   0   52.44    2.63
   3   5   0   48.74    2.79
   3   5   0   51.06    3.08
   3   5   0   51.65    2.75
   3   5   0   55.88    2.59
   3   5   0   51.00    2.73
   3   5   0   54.74    2.71
   3   5   0   50.32    2.68
   3   5   0   53.15    2.62
   3   5   0   52.15    2.61
   3   5   0   54.76    2.63
  -3  -5   0   52.85    2.64
  -3  -5   0   51.10    2.63
  -3  -5   0   53.55    2.73
  -3  -5   0   56.94    2.75
  -3  -5   0   53.66    2.64
  -3  -5   0   55.85    2.67
  -3  -5   0   57.93    2.74
  -3  -5   0   55.10    3.08
  -3  -5   0   54.32    2.63
  -3  -5   0   56.45    2.70
  -3  -5   0   56.45    2.63
  -3  -5   0   49.49    2.72
  -3  -5   0   55.05    2.62
  -3  -5   0   51.96    2.60
  -3  -5   0   49.83    2.81
  -3  -5   0   52.26    2.87
   2   5   0   60.48    3.12
   2   5   0   61.49    2.95
   2   5   0   57.82    2.99
   2   5   0   64.64    2.94
   2   5   0   56.51    3.03
   2   5   0   61.99    3.12
   2   5   0   62.51    2.93
   2   5   0   58.49    2.96
   2   5   0   63.22    2.96
   2   5   0   61.09    3.02
   2   5   0   60.90    2.94
   2   5   0   57.03    3.05
   2   5   0   51.37    2.96
   2   5   0   59.33    2.95
   2   5   0   60.64    3.36
  -2  -5   0   59.98    2.94
  -2  -5   0   58.08    2.95
  -2  -5   0   58.76    2.93
  -2  -5   0   61.78    3.03
  -2  -5   0   60.94    2.95
  -2  -5   0   55.97    3.02
  -2  -5   0   62.48    2.94
  -2  -5   0   56.61    3.11
  -2  -5   0   56.90    3.03
  -2  -5   0   59.66    2.96
  -2  -5   0   58.17    2.97
  -2  -5   0   61.41    2.96
  -2  -5   0   63.90    3.17
  -2  -5   0   63.97    2.95
  -2  -5   0   62.76    3.00
  -2  -5   0   61.62    3.32
   1   5   0  276.36   14.80
   1   5   0  295.91   14.82
   1   5   0  322.07   14.87
   1   5   0  332.63   14.95
   1   5   0  299.57   14.96
   1   5   0  315.21   14.86
   1   5   0  285.62   14.94
   1   5   0  300.04   14.88
   1   5   0  298.04   14.93
   1   5   0  335.44   14.96
   1   5   0  308.21   15.15
   1   5   0  306.85   14.86
   1   5   0  299.44   15.03
   1   5   0  298.71   14.94
   1   5   0  308.70   14.97
   1   5   0  305.17   14.92
  -1  -5   0  292.71   14.85
  -1  -5   0  307.41   15.10
  -1  -5   0  319.94   15.03
  -1  -5   0  328.12   14.84
  -1  -5   0  327.41   14.98
  -1  -5   0  322.30   14.99
  -1  -5   0  308.51   14.93
  -1  -5   0  280.52   14.94
  -1  -5   0  291.91   14.95
  -1  -5   0  337.04   14.88
  -1  -5   0  309.57   14.98
  -1  -5   0  293.76   14.88
  -1  -5   0  307.26   14.93
  -1  -5   0  321.22   14.96
   0   5   0    0.12    0.19
   0   5   0    0.94    0.19
   0   5   0    0.04    0.07
   0   5   0    0.08    0.07
   0   5   0    0.11    0.06
   0   5   0    0.10    0.05
   0   5   0    0.01    0.06
   0   5   0    0.47    0.14
   0   5   0    0.09    0.05
   0   5   0    0.02    0.07
   0   5   0    0.05    0.06
   0   5   0    0.10    0.06
   0   5   0    0.09    0.09
   0   5   0    0.01    0.07
   0   5   0    0.12    0.05
   0   5   0    0.13    0.11
   0   5   0   -0.05    0.09
   0   5   0   -0.03    0.11
   0  -5   0   -0.01    0.05
   0  -5   0    0.08    0.13
   0  -5   0    0.02    0.11
   0  -5   0    0.12    0.08
   0  -5   0    0.16    0.16
   0  -5   0    0.03    0.08
   0  -5   0   -0.04    0.10
   0  -5   0    0.14    0.06
   0  -5   0    0.26    0.10
   0  -5   0    0.04    0.09
   0  -5   0    0.06    0.06
   0  -5   0   -0.01    0.07
   0  -5   0    0.19    0.07
   0  -5   0    0.02    0.10
   0  -5   0    0.10    0.07
  -1   5   0  291.35   15.16
  -1   5   0  303.45   15.01
  -1   5   0  314.51   15.10
  -1   5   0  285.65   15.03
  -1   5   0  297.23   15.21
  -1   5   0  304.16   15.17
  -1   5   0  321.07   15.25
  -1   5   0  304.58   15.15
  -1   5   0  350.03   15.43
  -1   5   0  297.42   15.08
  -1   5   0  301.79   15.04
  -1   5   0  287.62   15.03
  -1   5   0  315.62   15.14
  -1   5   0  353.27   15.13
  -1   5   0  331.53   15.15
  -1   5   0  329.12   15.34
  -1   5   0  329.94   15.14
  -1   5   0  351.78   15.06
  -1   5   0  296.46   15.04
   1  -5   0  268.65   15.10
   1  -5   0  304.97   15.05
   1  -5   0  318.54   15.17
   1  -5   0  295.79   15.19
   1  -5   0  313.55   15.17
   1  -5   0  325.54   15.20
   1  -5   0  319.29   15.21
   1  -5   0  312.00   15.11
   1  -5   0  302.71   15.08
   1  -5   0  298.21   15.06
   1  -5   0  329.45   15.38
   1  -5   0  317.45   15.13
   1  -5   0  306.70   15.20
   1  -5   0  318.71   15.05
   1  -5   0  310.79   15.15
  -2   5   0   62.73    3.06
  -2   5   0   59.32    3.08
  -2   5   0   63.21    3.08
  -2   5   0   64.30    3.05
  -2   5   0   60.29    3.05
  -2   5   0   63.82    3.03
  -2   5   0   70.85    3.16
  -2   5   0   64.89    3.31
  -2   5   0   66.86    3.16
  -2   5   0   62.47    3.09
  -2   5   0   65.51    3.13
  -2   5   0   63.82    3.14
  -2   5   0   62.30    3.05
  -2   5   0   58.71    3.05
  -2   5   0   60.22    3.08
  -2   5   0   63.23    3.12
  -2   5   0   71.21    3.11
  -2   5   0   59.28    3.19
   2  -5   0   59.75    3.26
   2  -5   0   60.21    3.06
   2  -5   0   61.66    3.07
   2  -5   0   62.19    3.09
   2  -5   0   62.80    3.12
   2  -5   0   62.07    3.19
   2  -5   0   63.10    3.07
   2  -5   0   62.45    3.06
   2  -5   0   60.08    3.13
   2  -5   0   66.66    3.13
   2  -5   0   57.61    3.06
   2  -5   0   63.31    3.20
   2  -5   0   66.87    3.14
   2  -5   0   61.39    3.08
   2  -5   0   63.14    3.06
   2  -5   0   63.48    3.07
  -3   5   0   53.48    2.67
  -3   5   0   54.64    2.70
  -3   5   0   52.18    2.71
  -3   5   0   59.71    2.95
  -3   5   0   55.13    2.70
  -3   5   0   56.75    2.84
  -3   5   0   56.18    2.74
  -3   5   0   59.80    2.79
  -3   5   0   55.05    2.68
  -3   5   0   50.57    2.66
  -3   5   0   52.70    2.67
  -3   5   0   53.96    2.74
  -3   5   0   53.30    2.66
  -3   5   0   52.63    2.76
  -3   5   0   57.60    2.73
  -3   5   0   54.79    2.71
  -3   5   0   56.13    2.78
   3  -5   0   59.77    2.76
   3  -5   0   55.90    2.69
   3  -5   0   53.75    2.82
   3  -5   0   57.82    2.83
   3  -5   0   53.98    2.69
   3  -5   0   56.29    2.70
   3  -5   0   54.07    2.68
   3  -5   0   50.77    2.89
   3  -5   0   54.40    2.71
   3  -5   0   57.98    2.78
   3  -5   0   54.16    2.74
   3  -5   0   55.71    2.68
   3  -5   0   54.57    2.69
   3  -5   0   54.22    2.69
   3  -5   0   53.77    2.69
   3  -5   0   53.73    2.77
  -4   5   0  164.80    8.00
  -4   5   0  156.89    8.02
  -4   5   0  163.33    8.01
  -4   5   0  169.26    8.11
  -4   5   0  168.25    8.09
  -4   5   0  161.57    7.99
  -4   5   0  161.09    8.03
  -4   5   0  163.87    8.05
  -4   5   0  179.74    8.32
  -4   5   0  159.55    8.03
  -4   5   0  162.31    8.11
  -4   5   0  182.98    8.16
  -4   5   0  158.08    8.06
  -4   5   0  168.32    8.06
  -4   5   0  156.25    8.04
  -4   5   0  168.31    8.04
  -4   5   0  172.98    8.08
  -4   5   0  167.00    8.07
   4  -5   0  162.69    8.12
   4  -5   0  170.99    8.13
   4  -5   0  165.69    8.04
   4  -5   0  171.72    8.06
   4  -5   0  167.92    8.03
   4  -5   0  164.50    8.17
   4  -5   0  162.05    8.03
   4  -5   0  161.57    8.06
   4  -5   0  160.42    8.01
   4  -5   0  160.66    8.05
   4  -5   0  179.83    8.18
   4  -5   0  184.78    8.10
   4  -5   0  158.85    8.27
   4  -5   0  164.17    8.03
   4  -5   0  168.86    8.03
   4  -5   0  170.43    8.09
  -5   5   0    0.03    0.10
  -5   5   0   -0.07    0.09
  -5   5   0    0.01    0.04
  -5   5   0    0.06    0.08
  -5   5   0    0.07    0.04
  -5   5   0    0.11    0.08
  -5   5   0   -0.03    0.07
  -5   5   0    0.13    0.11
  -5   5   0   -0.07    0.15
  -5   5   0    0.01    0.04
  -5   5   0    0.14    0.13
  -5   5   0    0.05    0.04
  -5   5   0   -0.01    0.05
  -5   5   0    0.04    0.13
  -5   5   0    0.03    0.04
  -5   5   0    0.02    0.06
  -5   5   0    0.12    0.08
  -5   5   0   -0.06    0.07
  -5   5   0    0.08    0.25
   5  -5   0    0.01    0.11
   5  -5   0    0.16    0.07
   5  -5   0    0.06    0.06
   5  -5   0    0.09    0.03
   5  -5   0    0.10    0.11
   5  -5   0    0.09    0.06
   5  -5   0    0.08    0.13
   5  -5   0    0.15    0.06
   5  -5   0    0.11    0.14
   5  -5   0    0.09    0.11
   5  -5   0    0.12    0.13
   5  -5   0    0.07    0.16
   5  -5   0    0.03    0.06
   5  -5   0    0.09    0.07
   5  -5   0    0.18    0.09
   5  -5   0    0.03    0.06
   5  -5   0    0.11    0.08
   5  -5   0    0.21    0.10
  -6   5   0   45.84    2.29
  -6   5   0   45.96    2.30
  -6   5   0   46.58    2.38
  -6   5   0   49.75    2.33
  -6   5   0   46.41    2.40
  -6   5   0   46.91    2.30
  -6   5   0   45.92    2.37
  -6   5   0   46.04    2.30
  -6   5   0   49.86    2.40
  -6   5   0   46.21    2.42
  -6   5   0   45.78    2.37
  -6   5   0   48.70    2.47
  -6   5   0   46.63    2.47
  -6   5   0   49.24    2.37
  -6   5   0   50.96    2.69
  -6   5   0   47.86    2.34
  -6   5   0   43.94    2.29
   6  -5   0   46.05    2.34
   6  -5   0   48.18    2.38
   6  -5   0   46.20    2.34
   6  -5   0   47.04    2.45
   6  -5   0   48.83    2.43
   6  -5   0   45.94    2.46
   6  -5   0   49.53    2.44
   6  -5   0   46.71    2.51
   6  -5   0   50.07    2.36
   6  -5   0   50.88    2.49
   6  -5   0   49.04    2.36
   6  -5   0   46.33    2.33
   6  -5   0   46.10    2.52
   6  -5   0   48.30    2.35
   6  -5   0   46.40    2.36
  -7   5   0   14.82    0.76
  -7   5   0   15.44    0.87
  -7   5   0   16.14    0.97
  -7   5   0   15.29    0.89
  -7   5   0   14.67    0.95
  -7   5   0   15.35    0.86
  -7   5   0   16.04    0.85
  -7   5   0   15.43    0.80
  -7   5   0   14.38    0.77
  -7   5   0   14.99    0.75
  -7   5   0   15.42    0.91
  -7   5   0   19.07    1.46
  -7   5   0   16.91    1.18
  -7   5   0   15.64    0.76
  -7   5   0   16.20    0.82
  -7   5   0   13.84    0.75
  -7   5   0   15.03    0.86
   7  -5   0   14.84    0.83
   7  -5   0   15.53    0.81
   7  -5   0   15.19    0.82
   7  -5   0   15.57    0.97
   7  -5   0   14.84    0.92
   7  -5   0   14.01    0.93
   7  -5   0   15.35    0.87
   7  -5   0   15.18    0.85
   7  -5   0   15.51    1.01
   7  -5   0   16.06    0.84
   7  -5   0   16.69    0.97
   7  -5   0   15.43    0.83
   7  -5   0   16.81    0.94
  -8   5   0   73.28    4.00
  -8   5   0   77.63    4.01
  -8   5   0   70.85    3.92
  -8   5   0   80.18    3.90
  -8   5   0   81.33    3.86
  -8   5   0   77.02    3.80
  -8   5   0   79.93    3.96
  -8   5   0   80.04    4.29
  -8   5   0   80.44    4.60
  -8   5   0   81.27    3.89
  -8   5   0   81.21    3.93
   8  -5   0   82.91    3.93
   8  -5   0   76.29    3.87
   8  -5   0   82.58    3.88
   8  -5   0   82.16    3.90
   8  -5   0   76.12    4.01
   8  -5   0   78.07    3.90
   8  -5   0   80.11    4.02
   8  -5   0   75.07    3.87
   8  -5   0   80.21    4.00
   8  -5   0   76.74    4.03
   8  -5   0   75.85    3.85
   8  -5   0   79.30    3.98
   8  -5   0   80.49    4.09
  -9   5   0    3.53    0.45
  -9   5   0    3.38    0.26
  -9   5   0    3.32    0.39
  -9   5   0    3.03    0.32
  -9   5   0    3.60    0.30
  -9   5   0    3.30    0.19
  -9   5   0    3.46    0.63
  -9   5   0    3.54    0.32
  -9   5   0    3.54    0.38
  -9   5   0    3.28    0.82
   9  -5   0    3.40    0.36
   9  -5   0    3.28    0.29
   9  -5   0    2.84    0.46
   9  -5   0    3.26    0.28
   9  -5   0    3.21    0.44
   9  -5   0    3.41    0.30
   9  -5   0    3.73    0.33
   9  -5   0    3.27    0.47
   9  -5   0    2.86    0.26
   9  -5   0    3.42    0.42
   9  -5   0    3.40    0.43
   9  -5   0    2.86    0.31
 -10   5   0   26.88    1.40
 -10   5   0   25.19    1.45
 -10   5   0   25.69    1.35
 -10   5   0   24.09    1.37
 -10   5   0   23.64    1.46
 -10   5   0   23.49    2.11
 -10   5   0   25.25    1.81
 -10   5   0   25.19    1.52
  10  -5   0   24.36    1.32
  10  -5   0   26.35    1.55
  10  -5   0   25.98    1.36
  10  -5   0   26.12    1.53
  10  -5   0   25.71    1.60
  10  -5   0   25.06    1.34
  10  -5   0   27.30    1.50
  10  -5   0   23.45    1.37
  10  -5   0   24.73    1.37
  10  -5   0   24.33    1.52
  10  -5   0   24.34    1.35
 -11   5   0   50.76    3.69
 -11   5   0   55.87    3.31
 -11   5   0   57.88    2.73
 -11   5   0   55.88    2.76
 -11   5   0   53.63    2.84
 -11   5   0   51.84    2.91
 -11   5   0   51.90    2.99
  11  -5   0   53.32    2.73
  11  -5   0   53.37    2.95
  11  -5   0   51.83    2.93
  11  -5   0   54.20    2.74
  11  -5   0   54.78    2.78
  11  -5   0   54.33    2.71
  11  -5   0   50.55    2.76
  11  -5   0   53.52    2.95
  11  -5   0   54.39    3.03
  11  -5   0   58.60    2.91
  11  -5   0   49.57    2.74
 -12   5   0    1.04    0.40
 -12   5   0    1.27    0.36
 -12   5   0    1.21    0.71
 -12   5   0    0.96    0.22
 -12   5   0    1.31    0.57
 -12   5   0    0.31    0.25
 -12   5   0    0.61    0.20
  12  -5   0    1.18    0.35
  12  -5   0    1.12    0.39
  12  -5   0    0.86    0.22
  12  -5   0    0.75    0.31
  12  -5   0    0.99    0.21
  12  -5   0    0.58    0.22
  12  -5   0    0.90    0.24
  12  -5   0    0.99    0.35
  12  -5   0    0.65    0.34
 -13   5   0   12.94    1.09
 -13   5   0   16.12    1.06
 -13   5   0   15.45    1.50
 -13   5   0   14.93    2.13
 -13   5   0   14.22    1.16
 -13   5   0   16.44    0.90
 -13   5   0   15.51    0.95
  13  -5   0   13.03    1.11
  13  -5   0   14.03    1.14
  13  -5   0   14.52    0.91
  13  -5   0   13.94    0.89
  13  -5   0   15.48    1.25
  13  -5   0   15.82    1.10
  13  -5   0   15.31    0.97
 -14   5   0    0.73    0.22
 -14   5   0    0.93    0.39
 -14   5   0    1.14    0.36
 -14   5   0    1.10    0.38
 -14   5   0    1.51    0.66
  14  -5   0    0.88    0.24
  14  -5   0    0.76    0.37
  14  -5   0    0.85    0.44
  14  -5   0    0.89    0.25
  14  -5   0    1.07    0.30
  14  -5   0    1.09    0.41
  14  -5   0    1.27    0.45
 -15   5   0   19.70    1.38
 -15   5   0   19.15    1.57
 -15   5   0   21.12    1.18
 -15   5   0   19.73    1.46
  15  -5   0   20.75    1.52
  15  -5   0   21.79    1.46
  15  -5   0   21.53    1.26
  15  -5   0   21.05    1.25
  15  -5   0   21.87    1.31
 -16   5   0    3.85    0.40
 -16   5   0    3.69    0.66
 -16   5   0    4.00    0.81
 -16   5   0    3.27    0.59
  16  -5   0    4.21    0.49
  16  -5   0    3.43    0.50
  16  -5   0    4.95    0.74
 -17   5   0    0.43    0.37
 -17   5   0    0.40    0.50
 -17   5   0    0.12    0.39
  17  -5   0    0.37    0.29
  17  -5   0    0.88    0.44
  17  -5   0    0.88    0.33
 -18   5   0    5.05    0.81
 -18   5   0    5.75    1.04
 -18   5   0    5.53    0.80
  18  -5   0    8.23    0.74
  18  -5   0    5.74    0.89
  17   6   0    1.74    0.68
  17   6   0    1.87    0.38
  17   6   0    1.52    0.58
  17   6   0    2.91    0.64
  17   6   0    1.87    0.44
  17   6   0    1.07    0.36
 -17  -6   0    1.93    0.61
 -17  -6   0    1.34    0.82
 -17  -6   0    1.49    0.23
 -17  -6   0    2.24    0.45
 -17  -6   0    1.57    0.21
 -17  -6   0    1.44    0.19
  16   6   0   -0.01    0.26
  16   6   0    0.66    0.45
  16   6   0    0.58    0.41
  16   6   0    1.10    0.37
  16   6   0    0.85    0.55
  16   6   0    0.03    0.24
 -16  -6   0    0.27    0.13
 -16  -6   0    0.22    0.17
 -16  -6   0    0.50    0.63
 -16  -6   0    0.16    0.14
 -16  -6   0    0.68    0.48
 -16  -6   0    0.23    0.17
 -16  -6   0    0.15    0.32
  15   6   0    0.21    0.28
  15   6   0    0.66    0.40
  15   6   0    0.40    0.26
  15   6   0    0.37    0.39
  15   6   0    0.09    0.24
  15   6   0    0.02    0.46
 -15  -6   0    0.27    0.55
 -15  -6   0    0.13    0.41
 -15  -6   0    0.23    0.13
 -15  -6   0   -0.16    0.26
 -15  -6   0    0.23    0.14
 -15  -6   0    0.10    0.37
 -15  -6   0    0.18    0.13
 -15  -6   0    0.28    0.17
 -15  -6   0    0.37    0.18
 -15  -6   0    0.28    0.48
  14   6   0    6.42    0.84
  14   6   0    7.06    0.66
  14   6   0    6.75    0.59
  14   6   0    5.83    0.81
  14   6   0    5.49    0.58
  14   6   0    4.98    0.88
 -14  -6   0    7.14    0.51
 -14  -6   0    6.92    0.45
 -14  -6   0    6.80    0.46
 -14  -6   0    6.30    0.72
 -14  -6   0    6.32    0.51
 -14  -6   0    6.64    0.90
 -14  -6   0    6.65    0.46
 -14  -6   0    6.48    0.80
 -14  -6   0    5.81    0.72
 -14  -6   0    7.76    1.22
  13   6   0    0.05    0.22
  13   6   0    0.91    0.31
  13   6   0    0.54    0.46
  13   6   0    0.27    0.36
  13   6   0    0.18    0.30
  13   6   0    0.74    0.24
  13   6   0    0.38    0.24
 -13  -6   0    0.37    0.51
 -13  -6   0   -0.03    0.14
 -13  -6   0    0.55    0.32
 -13  -6   0    0.33    0.31
 -13  -6   0    0.54    0.31
 -13  -6   0    0.55    0.20
 -13  -6   0    0.53    0.15
 -13  -6   0    0.32    0.14
 -13  -6   0    0.26    0.14
  12   6   0    1.25    0.49
  12   6   0    1.19    0.33
  12   6   0    0.81    0.33
  12   6   0    1.28    0.27
  12   6   0    1.50    0.26
  12   6   0    0.77    0.34
  12   6   0    1.33    0.30
  12   6   0    1.16    0.29
  12   6   0    1.11    0.26
 -12  -6   0    1.24    0.35
 -12  -6   0    1.22    0.33
 -12  -6   0    0.98    0.22
 -12  -6   0    0.89    0.54
 -12  -6   0    1.20    0.22
 -12  -6   0    1.13    0.18
 -12  -6   0    0.58    0.32
 -12  -6   0    1.18    0.20
 -12  -6   0    0.95    0.18
 -12  -6   0    1.08    0.42
 -12  -6   0    1.22    0.22
  11   6   0    0.90    0.35
  11   6   0    1.04    0.25
  11   6   0    0.91    0.33
  11   6   0    1.00    0.23
  11   6   0    1.26    0.29
  11   6   0    1.29    0.25
  11   6   0    0.79    0.38
  11   6   0    1.40    0.44
  11   6   0    1.13    0.46
  11   6   0    0.69    0.41
  11   6   0    1.55    0.35
  11   6   0    1.32    0.26
 -11  -6   0    0.81    0.31
 -11  -6   0    1.24    0.18
 -11  -6   0    1.06    0.31
 -11  -6   0    0.86    0.19
 -11  -6   0    1.13    0.21
 -11  -6   0    0.60    0.37
 -11  -6   0    1.26    0.71
 -11  -6   0    1.09    0.25
 -11  -6   0    1.14    0.56
 -11  -6   0    1.34    0.44
 -11  -6   0    1.22    0.24
 -11  -6   0    1.03    0.22
 -11  -6   0    1.00    0.54
 -11  -6   0    1.07    0.35
 -11  -6   0    0.95    0.21
 -11  -6   0    0.79    0.34
  10   6   0   -0.37    0.25
  10   6   0   -0.10    0.15
  10   6   0    0.24    0.28
  10   6   0   -0.19    0.15
  10   6   0   -0.05    0.29
  10   6   0   -0.15    0.26
  10   6   0   -0.07    0.15
  10   6   0    0.01    0.25
  10   6   0    0.18    0.27
  10   6   0    0.11    0.19
  10   6   0    0.12    0.21
  10   6   0    0.00    0.13
  10   6   0   -0.29    0.14
  10   6   0    0.05    0.27
  10   6   0    0.35    0.77
 -10  -6   0   -0.18    0.22
 -10  -6   0   -0.13    0.12
 -10  -6   0   -0.02    0.22
 -10  -6   0    0.17    0.17
 -10  -6   0    0.16    0.51
 -10  -6   0   -0.05    0.28
 -10  -6   0    0.05    0.14
 -10  -6   0   -0.29    0.11
 -10  -6   0   -0.08    0.11
 -10  -6   0   -0.04    0.16
 -10  -6   0   -0.19    0.11
 -10  -6   0   -0.03    0.20
 -10  -6   0    0.01    0.11
 -10  -6   0   -0.17    0.22
 -10  -6   0   -0.42    0.32
 -10  -6   0   -0.16    0.13
 -10  -6   0   -0.05    0.12
 -10  -6   0    0.00    0.33
 -10  -6   0   -0.10    0.17
   9   6   0    0.27    0.17
   9   6   0    0.38    0.27
   9   6   0   -0.02    0.18
   9   6   0    0.24    0.29
   9   6   0    0.08    0.15
   9   6   0    0.17    0.19
   9   6   0   -0.14    0.15
   9   6   0    0.56    0.58
   9   6   0   -0.08    0.20
   9   6   0    0.17    0.22
   9   6   0    0.07    0.14
   9   6   0    0.24    0.13
   9   6   0    0.21    0.16
   9   6   0    0.17    0.32
   9   6   0    0.02    0.27
  -9  -6   0    0.20    0.23
  -9  -6   0    0.32    0.49
  -9  -6   0    0.11    0.19
  -9  -6   0    0.03    0.17
  -9  -6   0    0.15    0.14
  -9  -6   0    0.13    0.14
  -9  -6   0    0.12    0.12
  -9  -6   0    0.17    0.13
  -9  -6   0   -0.12    0.19
  -9  -6   0    0.01    0.12
  -9  -6   0    0.31    0.35
  -9  -6   0    0.29    0.16
  -9  -6   0    0.43    0.24
  -9  -6   0    0.00    0.12
  -9  -6   0   -0.15    0.30
  -9  -6   0   -0.03    0.13
  -9  -6   0    0.25    0.12
  -9  -6   0   -0.02    0.21
  -9  -6   0    0.05    0.16
   8   6   0    0.47    0.23
   8   6   0    0.36    0.15
   8   6   0    0.44    0.17
   8   6   0    0.03    0.16
   8   6   0    0.36    0.28
   8   6   0    0.21    0.28
   8   6   0    0.04    0.43
   8   6   0    0.05    0.20
   8   6   0    0.25    0.14
   8   6   0    0.14    0.18
   8   6   0    0.36    0.21
   8   6   0    0.09    0.15
   8   6   0    0.59    0.32
   8   6   0    0.31    0.14
   8   6   0    0.36    0.25
  -8  -6   0    0.14    0.11
  -8  -6   0    0.25    0.14
  -8  -6   0    0.37    0.17
  -8  -6   0    0.13    0.20
  -8  -6   0    0.43    0.14
  -8  -6   0    0.12    0.33
  -8  -6   0    0.42    0.14
  -8  -6   0    0.57    0.24
  -8  -6   0    0.33    0.17
  -8  -6   0    0.19    0.24
  -8  -6   0    0.35    0.16
  -8  -6   0    0.33    0.14
  -8  -6   0    0.41    0.25
  -8  -6   0    0.01    0.17
  -8  -6   0    0.30    0.34
  -8  -6   0    0.34    0.21
  -8  -6   0    0.43    0.16
  -8  -6   0    0.29    0.14
   7   6   0    0.04    0.19
   7   6   0    0.36    0.14
   7   6   0    0.13    0.15
   7   6   0    0.15    0.23
   7   6   0    0.35    0.13
   7   6   0    0.03    0.18
   7   6   0    0.18    0.24
   7   6   0    0.04    0.13
   7   6   0    0.30    0.13
   7   6   0    0.11    0.12
   7   6   0   -0.03    0.14
   7   6   0    0.35    0.16
   7   6   0    0.16    0.21
   7   6   0    0.21    0.21
   7   6   0   -0.07    0.35
   7   6   0    0.27    0.22
  -7  -6   0    0.01    0.20
  -7  -6   0    0.43    0.20
  -7  -6   0    0.27    0.18
  -7  -6   0    0.27    0.13
  -7  -6   0    0.01    0.12
  -7  -6   0    0.30    0.14
  -7  -6   0    0.24    0.12
  -7  -6   0   -0.08    0.26
  -7  -6   0    0.19    0.12
  -7  -6   0    0.19    0.11
  -7  -6   0    0.06    0.18
  -7  -6   0    0.35    0.33
  -7  -6   0    0.05    0.21
  -7  -6   0    0.17    0.13
  -7  -6   0    0.05    0.13
  -7  -6   0    0.24    0.13
  -7  -6   0    0.13    0.23
  -7  -6   0    0.44    0.13
   6   6   0    7.00    0.58
   6   6   0    5.81    0.43
   6   6   0    6.28    0.44
   6   6   0    5.54    0.51
   6   6   0    6.39    0.42
   6   6   0    6.50    0.43
   6   6   0    6.10    0.44
   6   6   0    6.75    0.60
   6   6   0    6.72    0.69
   6   6   0    6.14    0.53
   6   6   0    6.25    0.51
   6   6   0    5.77    0.66
   6   6   0    6.45    0.67
   6   6   0    7.42    1.13
   6   6   0    6.47    0.45
  -6  -6   0    7.25    1.07
  -6  -6   0    7.32    0.55
  -6  -6   0    6.46    0.45
  -6  -6   0    6.36    0.43
  -6  -6   0    5.81    0.55
  -6  -6   0    6.88    0.43
  -6  -6   0    5.74    0.40
  -6  -6   0    6.83    0.43
  -6  -6   0    6.64    0.84
  -6  -6   0    6.19    0.65
  -6  -6   0    7.04    0.79
  -6  -6   0    6.62    0.64
  -6  -6   0    7.13    0.46
  -6  -6   0    7.29    0.58
  -6  -6   0    7.17    0.46
  -6  -6   0    6.94    0.49
  -6  -6   0    5.50    0.44
   5   6   0   16.74    0.89
   5   6   0   16.15    0.87
   5   6   0   14.62    1.41
   5   6   0   13.98    1.02
   5   6   0   16.38    0.89
   5   6   0   14.41    0.93
   5   6   0   15.98    0.87
   5   6   0   14.06    0.95
   5   6   0   16.20    0.86
   5   6   0   15.09    1.12
   5   6   0   15.68    1.10
   5   6   0   16.00    0.99
   5   6   0   17.04    1.02
   5   6   0   16.54    0.89
   5   6   0   15.90    1.03
  -5  -6   0   17.34    0.88
  -5  -6   0   16.81    1.04
  -5  -6   0   16.21    1.21
  -5  -6   0   17.70    0.90
  -5  -6   0   15.54    0.88
  -5  -6   0   15.09    1.00
  -5  -6   0   15.29    0.89
  -5  -6   0   15.86    0.90
  -5  -6   0   18.48    1.47
  -5  -6   0   17.46    0.98
  -5  -6   0   14.92    0.91
  -5  -6   0   16.26    1.11
  -5  -6   0   16.52    0.90
  -5  -6   0   15.03    1.34
  -5  -6   0   16.24    0.85
  -5  -6   0   14.35    1.00
   4   6   0    0.49    0.23
   4   6   0    0.67    0.14
   4   6   0    0.75    0.14
   4   6   0    0.62    0.11
   4   6   0    0.70    0.25
   4   6   0    0.59    0.20
   4   6   0    0.90    0.21
   4   6   0    0.53    0.09
   4   6   0    0.44    0.37
   4   6   0    0.64    0.13
   4   6   0    0.65    0.18
   4   6   0    0.22    0.16
   4   6   0    0.45    0.12
   4   6   0    0.70    0.13
   4   6   0    0.37    0.11
  -4  -6   0    0.53    0.16
  -4  -6   0    0.52    0.13
  -4  -6   0    0.64    0.13
  -4  -6   0    0.68    0.23
  -4  -6   0    0.50    0.11
  -4  -6   0    0.28    0.20
  -4  -6   0    0.73    0.15
  -4  -6   0    0.43    0.32
  -4  -6   0    0.30    0.24
  -4  -6   0    0.64    0.18
  -4  -6   0    0.56    0.15
  -4  -6   0    0.62    0.35
  -4  -6   0    0.61    0.12
  -4  -6   0    0.75    0.14
  -4  -6   0    0.50    0.12
  -4  -6   0    0.37    0.22
  -4  -6   0    0.27    0.18
   3   6   0    0.15    0.10
   3   6   0    0.16    0.08
   3   6   0    0.04    0.12
   3   6   0    0.06    0.13
   3   6   0    0.11    0.10
   3   6   0    0.16    0.15
   3   6   0   -0.15    0.16
   3   6   0    0.03    0.08
   3   6   0    0.04    0.08
   3   6   0    0.02    0.12
   3   6   0    0.17    0.19
   3   6   0    0.07    0.08
   3   6   0    0.10    0.09
   3   6   0    0.28    0.31
   3   6   0    0.15    0.06
   3   6   0    0.10    0.14
  -3  -6   0    0.07    0.15
  -3  -6   0    0.11    0.24
  -3  -6   0    0.10    0.12
  -3  -6   0    0.05    0.17
  -3  -6   0    0.19    0.09
  -3  -6   0    0.14    0.07
  -3  -6   0   -0.01    0.08
  -3  -6   0    0.06    0.16
  -3  -6   0    0.16    0.10
  -3  -6   0    0.12    0.10
  -3  -6   0    0.18    0.09
  -3  -6   0   -0.03    0.08
  -3  -6   0    0.20    0.08
  -3  -6   0    0.21    0.10
  -3  -6   0    0.16    0.24
  -3  -6   0    0.30    0.20
  -3  -6   0    0.00    0.11
   2   6   0   15.10    0.90
   2   6   0   15.47    0.95
   2   6   0   14.98    0.96
   2   6   0   14.55    0.86
   2   6   0   16.52    1.28
   2   6   0   15.19    1.02
   2   6   0   16.98    0.94
   2   6   0   15.52    1.03
   2   6   0   15.18    0.84
   2   6   0   16.73    0.86
   2   6   0   16.09    0.83
   2   6   0   14.91    0.88
   2   6   0   17.79    0.85
   2   6   0   16.99    0.87
  -2  -6   0   16.41    0.87
  -2  -6   0   15.66    1.06
  -2  -6   0   15.74    0.84
  -2  -6   0   16.98    0.85
  -2  -6   0   17.49    0.96
  -2  -6   0   14.63    1.03
  -2  -6   0   15.59    0.86
  -2  -6   0   16.22    0.87
  -2  -6   0   15.16    0.86
  -2  -6   0   15.65    0.90
  -2  -6   0   15.54    0.97
  -2  -6   0   16.49    0.88
  -2  -6   0   16.55    0.89
  -2  -6   0   16.98    0.85
  -2  -6   0   18.05    1.26
   1   6   0    8.10    0.46
   1   6   0    8.47    0.47
   1   6   0    9.35    0.56
   1   6   0    7.78    0.45
   1   6   0    7.36    0.51
   1   6   0    8.02    0.62
   1   6   0    8.73    0.48
   1   6   0    7.60    0.51
   1   6   0    8.37    0.80
   1   6   0    7.48    0.47
   1   6   0    8.27    0.62
   1   6   0    8.11    0.46
   1   6   0    7.32    0.54
   1   6   0    7.12    0.48
   1   6   0    7.99    0.56
   1   6   0    7.52    0.44
   1   6   0    9.93    0.46
  -1  -6   0    8.56    0.51
  -1  -6   0    8.64    0.55
  -1  -6   0    7.93    0.47
  -1  -6   0    8.05    0.47
  -1  -6   0    7.62    0.63
  -1  -6   0    8.16    0.74
  -1  -6   0    7.92    0.49
  -1  -6   0    7.14    0.48
  -1  -6   0    8.21    0.49
  -1  -6   0    8.04    0.46
  -1  -6   0    8.22    0.46
  -1  -6   0    8.49    0.57
  -1  -6   0    7.63    0.63
  -1  -6   0    7.60    0.47
   0   6   0   35.24    1.83
   0   6   0   37.60    1.74
   0   6   0   34.35    1.84
   0   6   0   33.16    1.79
   0   6   0   34.21    1.79
   0   6   0   33.57    1.76
   0   6   0   33.86    1.72
   0   6   0   36.42    1.74
   0   6   0   37.55    1.93
   0   6   0   39.56    1.83
   0   6   0   34.10    1.74
   0   6   0   32.92    1.77
   0   6   0   34.06    1.74
   0   6   0   35.58    1.74
   0   6   0   33.37    1.88
   0   6   0   35.61    2.10
   0   6   0   35.11    1.75
   0   6   0   35.30    1.82
   0  -6   0   35.53    1.78
   0  -6   0   34.60    1.85
   0  -6   0   37.53    2.05
   0  -6   0   33.72    1.77
   0  -6   0   33.16    1.92
   0  -6   0   35.90    1.93
   0  -6   0   33.30    1.75
   0  -6   0   34.86    1.75
   0  -6   0   35.38    1.78
   0  -6   0   35.45    1.75
   0  -6   0   36.77    1.79
   0  -6   0   37.09    1.77
   0  -6   0   36.23    1.84
   0  -6   0   34.66    1.76
   0  -6   0   34.46    1.83
  -1   6   0    7.56    0.71
  -1   6   0    7.54    0.51
  -1   6   0    9.04    0.54
  -1   6   0    7.77    0.49
  -1   6   0    7.27    0.44
  -1   6   0    7.33    0.44
  -1   6   0    7.91    0.44
  -1   6   0    7.99    0.57
  -1   6   0    8.17    0.44
  -1   6   0    8.17    0.43
  -1   6   0    7.98    0.44
  -1   6   0    7.73    0.45
  -1   6   0    8.08    0.60
  -1   6   0    8.09    0.47
  -1   6   0    8.83    0.51
  -1   6   0    7.69    0.48
  -1   6   0    8.04    0.42
  -1   6   0    8.29    0.53
  -1   6   0    7.91    0.52
   1  -6   0    8.53    0.54
   1  -6   0    8.23    0.52
   1  -6   0    7.62    0.47
   1  -6   0    6.76    0.59
   1  -6   0    7.97    0.45
   1  -6   0    8.46    0.46
   1  -6   0    8.61    0.49
   1  -6   0    8.50    0.48
   1  -6   0    8.70    0.68
   1  -6   0    8.39    0.47
   1  -6   0    7.99    0.59
   1  -6   0    8.48    0.46
   1  -6   0    8.47    0.46
   1  -6   0    7.96    0.46
   1  -6   0    7.88    0.54
  -2   6   0   16.92    0.83
  -2   6   0   17.03    0.98
  -2   6   0   20.03    0.94
  -2   6   0   16.28    1.02
  -2   6   0   17.33    0.91
  -2   6   0   16.30    0.87
  -2   6   0   15.88    0.85
  -2   6   0   17.62    0.96
  -2   6   0   16.02    0.85
  -2   6   0   17.41    0.90
  -2   6   0   17.03    0.85
  -2   6   0   17.39    0.95
  -2   6   0   17.49    1.16
  -2   6   0   16.19    0.89
  -2   6   0   15.77    0.85
  -2   6   0   16.54    0.93
  -2   6   0   19.85    0.98
  -2   6   0   17.08    0.91
   2  -6   0   16.94    0.88
   2  -6   0   16.87    0.88
   2  -6   0   15.94    1.09
   2  -6   0   15.82    1.01
   2  -6   0   16.92    0.87
   2  -6   0   16.57    0.88
   2  -6   0   17.36    0.87
   2  -6   0   16.33    0.87
   2  -6   0   16.56    0.90
   2  -6   0   16.60    0.89
   2  -6   0   18.13    0.96
   2  -6   0   14.99    1.01
   2  -6   0   16.31    0.93
   2  -6   0   17.79    0.96
   2  -6   0   17.82    0.96
   2  -6   0   16.33    0.88
  -3   6   0    0.00    0.04
  -3   6   0    0.10    0.06
  -3   6   0    0.00    0.09
  -3   6   0    0.08    0.08
  -3   6   0    0.12    0.03
  -3   6   0    0.19    0.11
  -3   6   0    0.06    0.05
  -3   6   0    0.63    0.17
  -3   6   0    0.04    0.04
  -3   6   0    0.21    0.14
  -3   6   0    0.01    0.06
  -3   6   0    0.10    0.12
  -3   6   0    0.07    0.08
  -3   6   0    0.20    0.09
  -3   6   0    0.12    0.05
  -3   6   0    0.16    0.11
  -3   6   0    0.16    0.19
  -3   6   0    0.13    0.08
   3  -6   0    0.08    0.07
   3  -6   0    0.18    0.12
   3  -6   0    0.18    0.09
   3  -6   0    0.04    0.14
   3  -6   0    0.25    0.16
   3  -6   0    0.13    0.08
   3  -6   0    0.25    0.13
   3  -6   0    0.13    0.13
   3  -6   0    0.17    0.08
   3  -6   0    0.04    0.07
   3  -6   0    0.25    0.08
   3  -6   0    0.07    0.12
   3  -6   0    0.22    0.07
   3  -6   0    0.07    0.07
   3  -6   0    0.18    0.07
  -4   6   0    0.85    0.16
  -4   6   0    0.75    0.08
  -4   6   0    0.68    0.08
  -4   6   0    0.68    0.07
  -4   6   0    0.63    0.21
  -4   6   0    0.73    0.08
  -4   6   0    0.31    0.14
  -4   6   0    0.61    0.24
  -4   6   0    0.70    0.18
  -4   6   0    0.80    0.16
  -4   6   0    0.60    0.12
  -4   6   0    0.68    0.12
  -4   6   0    0.47    0.07
  -4   6   0    0.44    0.08
  -4   6   0    0.60    0.13
  -4   6   0    0.63    0.11
  -4   6   0    0.66    0.13
  -4   6   0    0.53    0.12
  -4   6   0    0.41    0.07
  -4   6   0    0.65    0.19
   4  -6   0    0.43    0.09
   4  -6   0    0.65    0.10
   4  -6   0    0.63    0.11
   4  -6   0    0.80    0.14
   4  -6   0    0.77    0.17
   4  -6   0    0.73    0.10
   4  -6   0    0.62    0.10
   4  -6   0    0.81    0.26
   4  -6   0    0.75    0.21
   4  -6   0    0.66    0.11
   4  -6   0    0.58    0.11
   4  -6   0    0.77    0.11
   4  -6   0    0.65    0.17
   4  -6   0    0.49    0.13
   4  -6   0    0.63    0.19
   4  -6   0    0.84    0.19
   4  -6   0    0.77    0.12
  -5   6   0   17.67    1.19
  -5   6   0   15.81    0.84
  -5   6   0   16.53    0.86
  -5   6   0   17.45    0.96
  -5   6   0   16.96    0.90
  -5   6   0   16.81    0.91
  -5   6   0   17.57    0.91
  -5   6   0   17.19    0.94
  -5   6   0   16.01    0.93
  -5   6   0   16.72    0.99
  -5   6   0   19.09    1.13
  -5   6   0   16.44    0.84
  -5   6   0   17.04    0.92
  -5   6   0   16.89    0.83
  -5   6   0   15.55    0.83
  -5   6   0   16.11    0.83
  -5   6   0   16.38    0.88
   5  -6   0   17.90    0.93
   5  -6   0   18.19    1.01
   5  -6   0   16.10    0.88
   5  -6   0   16.71    0.95
   5  -6   0   16.86    1.05
   5  -6   0   16.57    1.04
   5  -6   0   15.99    1.49
   5  -6   0   16.15    0.99
   5  -6   0   17.13    0.88
   5  -6   0   16.27    0.87
   5  -6   0   16.56    0.84
   5  -6   0   17.15    0.90
   5  -6   0   17.45    0.98
   5  -6   0   19.12    0.99
   5  -6   0   16.61    0.87
   5  -6   0   17.15    0.92
   5  -6   0   16.70    0.89
   5  -6   0   16.37    0.88
  -6   6   0    6.98    0.44
  -6   6   0    7.14    0.39
  -6   6   0    6.39    0.44
  -6   6   0    6.90    0.46
  -6   6   0    6.94    0.54
  -6   6   0    7.27    0.45
  -6   6   0    5.96    0.34
  -6   6   0    6.70    0.34
  -6   6   0    6.87    0.69
  -6   6   0    6.81    0.36
  -6   6   0    6.52    0.43
  -6   6   0    7.59    0.54
  -6   6   0    6.95    0.49
  -6   6   0    7.40    0.48
  -6   6   0    6.51    0.41
  -6   6   0    6.56    0.34
  -6   6   0    6.66    0.34
   6  -6   0    6.78    0.41
   6  -6   0    7.75    0.60
   6  -6   0    6.53    0.34
   6  -6   0    6.80    0.42
   6  -6   0    7.20    0.54
   6  -6   0    7.95    0.52
   6  -6   0    6.57    0.41
   6  -6   0    7.80    0.50
   6  -6   0    6.52    0.53
   6  -6   0    6.28    0.45
   6  -6   0    6.37    0.43
   6  -6   0    6.92    0.40
   6  -6   0    6.80    0.90
   6  -6   0    6.54    0.51
  -7   6   0    0.23    0.26
  -7   6   0    0.12    0.04
  -7   6   0    0.66    0.41
  -7   6   0    0.17    0.11
  -7   6   0    0.08    0.11
  -7   6   0    0.33    0.14
  -7   6   0    0.20    0.08
  -7   6   0    0.16    0.11
  -7   6   0    0.23    0.14
  -7   6   0    0.18    0.15
  -7   6   0   -0.07    0.15
   7  -6   0    0.40    0.19
   7  -6   0    0.03    0.12
   7  -6   0    0.35    0.15
   7  -6   0    0.26    0.18
   7  -6   0    0.17    0.09
   7  -6   0    0.27    0.17
   7  -6   0    0.11    0.11
   7  -6   0    0.27    0.09
   7  -6   0    0.25    0.11
   7  -6   0    0.33    0.20
   7  -6   0    0.18    0.10
   7  -6   0    0.19    0.09
   7  -6   0    0.35    0.19
  -8   6   0    0.36    0.14
  -8   6   0    0.33    0.14
  -8   6   0    0.35    0.42
  -8   6   0    0.40    0.18
  -8   6   0    0.45    0.11
  -8   6   0    0.38    0.14
  -8   6   0    0.16    0.15
  -8   6   0    0.42    0.20
  -8   6   0    0.40    0.29
  -8   6   0    0.47    0.22
   8  -6   0    0.68    0.26
   8  -6   0    0.72    0.27
   8  -6   0    0.38    0.18
   8  -6   0    0.30    0.12
   8  -6   0    0.24    0.10
   8  -6   0    0.41    0.13
   8  -6   0    0.74    0.26
   8  -6   0   -0.02    0.18
   8  -6   0    0.53    0.17
   8  -6   0    0.38    0.11
   8  -6   0    0.32    0.15
   8  -6   0    0.45    0.12
   8  -6   0    0.30    0.19
  -9   6   0    0.37    0.44
  -9   6   0    0.06    0.14
  -9   6   0    0.38    0.20
  -9   6   0    0.31    0.14
  -9   6   0    0.33    0.14
  -9   6   0    0.09    0.11
  -9   6   0    0.47    0.35
  -9   6   0    0.21    0.22
   9  -6   0    0.13    0.11
   9  -6   0    0.22    0.17
   9  -6   0    0.27    0.12
   9  -6   0    0.04    0.18
   9  -6   0    0.14    0.10
   9  -6   0    0.43    0.22
   9  -6   0    0.34    0.22
   9  -6   0    0.22    0.17
   9  -6   0    0.05    0.21
   9  -6   0    0.21    0.13
   9  -6   0    0.00    0.13
   9  -6   0    0.15    0.11
 -10   6   0   -0.04    0.31
 -10   6   0   -0.23    0.16
 -10   6   0   -0.10    0.12
 -10   6   0    0.03    0.13
 -10   6   0    0.07    0.15
 -10   6   0   -0.04    0.19
 -10   6   0    0.12    0.43
  10  -6   0    0.08    0.23
  10  -6   0    0.03    0.11
  10  -6   0    0.04    0.22
  10  -6   0   -0.15    0.10
  10  -6   0   -0.17    0.14
  10  -6   0   -0.16    0.11
  10  -6   0    0.00    0.12
  10  -6   0    0.01    0.18
  10  -6   0    0.13    0.14
  10  -6   0   -0.02    0.22
  10  -6   0    0.19    0.23
 -11   6   0    0.88    0.21
 -11   6   0    1.42    0.41
 -11   6   0    1.64    0.55
 -11   6   0    1.03    0.33
 -11   6   0    1.07    0.64
 -11   6   0    0.95    0.28
 -11   6   0    1.06    0.21
  11  -6   0    0.70    0.18
  11  -6   0    1.10    0.22
  11  -6   0    0.92    0.33
  11  -6   0    1.00    0.25
  11  -6   0    0.89    0.37
  11  -6   0    0.96    0.22
  11  -6   0    0.99    0.21
  11  -6   0    0.77    0.29
  11  -6   0    1.40    0.33
  11  -6   0    1.07    0.35
 -12   6   0    1.22    0.22
 -12   6   0    0.92    0.41
 -12   6   0    0.96    0.29
 -12   6   0    0.95    0.71
 -12   6   0    0.80    0.34
 -12   6   0    0.94    0.50
 -12   6   0    1.11    0.25
  12  -6   0    0.97    0.33
  12  -6   0    0.94    0.33
  12  -6   0    0.78    0.35
  12  -6   0    0.98    0.22
  12  -6   0    1.32    0.22
  12  -6   0    1.16    0.36
  12  -6   0    1.14    0.38
  12  -6   0    1.13    0.26
  12  -6   0    0.99    0.22
 -13   6   0    0.33    0.22
 -13   6   0    0.68    0.32
 -13   6   0    0.60    0.19
 -13   6   0    0.75    0.40
 -13   6   0    0.96    0.71
 -13   6   0    0.05    0.24
 -13   6   0    0.47    0.48
  13  -6   0    0.41    0.35
  13  -6   0    0.43    0.23
  13  -6   0    0.26    0.29
  13  -6   0    0.15    0.16
  13  -6   0   -0.15    0.24
  13  -6   0    0.77    0.36
  13  -6   0    0.55    0.22
 -14   6   0    8.12    1.40
 -14   6   0    5.65    0.75
 -14   6   0    5.60    0.68
 -14   6   0    6.71    0.49
 -14   6   0    5.44    0.85
  14  -6   0    6.59    0.59
  14  -6   0    5.54    0.55
  14  -6   0    7.30    0.81
  14  -6   0    5.39    0.89
  14  -6   0    6.22    0.52
  14  -6   0    6.17    0.81
  14  -6   0    5.92    0.88
 -15   6   0    0.17    0.18
 -15   6   0    0.57    0.34
 -15   6   0    0.19    0.33
 -15   6   0   -0.35    0.37
  15  -6   0    0.30    0.36
  15  -6   0   -0.02    0.23
  15  -6   0   -0.19    0.32
  15  -6   0    0.42    0.28
 -16   6   0    0.56    0.46
 -16   6   0    0.61    0.36
 -16   6   0    0.70    0.40
 -16   6   0    0.44    0.20
  16  -6   0    0.80    0.40
  16  -6   0    0.65    0.30
 -17   6   0    2.43    0.71
 -17   6   0    1.64    0.53
 -17   6   0    1.33    0.47
  17  -6   0    1.70    0.55
  17  -6   0    2.76    0.46
  17   7   0    0.51    0.31
  17   7   0    0.47    0.47
  17   7   0    1.05    0.39
  17   7   0   -0.24    0.50
  17   7   0   -0.23    0.44
  17   7   0    0.07    0.27
 -17  -7   0    0.69    0.70
 -17  -7   0    0.49    0.18
 -17  -7   0    0.77    0.38
 -17  -7   0    0.36    0.48
 -17  -7   0    0.14    0.14
  16   7   0   20.73    1.27
  16   7   0   20.11    1.34
  16   7   0   21.14    1.55
  16   7   0   16.51    1.50
  16   7   0   19.01    1.25
  16   7   0   18.31    1.70
 -16  -7   0   19.76    1.06
 -16  -7   0   19.58    1.13
 -16  -7   0   19.81    1.06
 -16  -7   0   18.53    1.11
 -16  -7   0   20.27    1.36
 -16  -7   0   19.85    1.06
 -16  -7   0   22.29    1.66
 -16  -7   0   20.94    2.17
  15   7   0    0.89    0.56
  15   7   0    0.05    0.26
  15   7   0    0.85    0.33
  15   7   0    0.99    0.45
  15   7   0    0.76    0.47
  15   7   0    1.08    0.31
 -15  -7   0    0.87    0.18
 -15  -7   0    0.87    0.18
 -15  -7   0    1.14    0.23
 -15  -7   0    0.69    0.66
 -15  -7   0    0.29    0.47
 -15  -7   0    0.87    0.18
 -15  -7   0    0.23    0.35
 -15  -7   0    0.71    0.23
  14   7   0   -0.06    0.23
  14   7   0    0.58    0.41
  14   7   0    0.20    0.22
  14   7   0    0.28    0.34
  14   7   0   -0.46    0.19
  14   7   0   -0.09    0.40
 -14  -7   0   -0.18    0.48
 -14  -7   0   -0.15    0.15
 -14  -7   0   -0.02    0.13
 -14  -7   0    0.12    0.15
 -14  -7   0   -0.10    0.16
 -14  -7   0    0.17    0.15
 -14  -7   0   -0.12    0.30
 -14  -7   0   -0.03    0.40
 -14  -7   0   -0.06    0.26
  13   7   0   22.71    1.44
  13   7   0   23.42    1.37
  13   7   0   22.81    1.59
  13   7   0   23.57    1.41
  13   7   0   20.02    1.59
  13   7   0   24.04    1.39
  13   7   0   23.40    1.78
 -13  -7   0   24.04    1.29
 -13  -7   0   24.40    1.53
 -13  -7   0   23.98    1.26
 -13  -7   0   21.86    1.66
 -13  -7   0   24.19    1.34
 -13  -7   0   25.00    1.33
 -13  -7   0   24.74    1.60
 -13  -7   0   21.64    1.45
 -13  -7   0   26.47    2.23
 -13  -7   0   24.29    1.29
  12   7   0    3.18    0.58
  12   7   0    4.13    0.76
  12   7   0    4.25    0.46
  12   7   0    4.32    0.52
  12   7   0    3.33    0.60
  12   7   0    3.78    0.42
  12   7   0    3.16    0.39
  12   7   0    3.59    0.44
 -12  -7   0    3.65    0.62
 -12  -7   0    3.56    0.57
 -12  -7   0    3.98    0.39
 -12  -7   0    3.87    0.58
 -12  -7   0    5.02    1.05
 -12  -7   0    3.48    0.35
 -12  -7   0    3.95    0.33
 -12  -7   0    4.13    0.42
 -12  -7   0    3.84    0.50
 -12  -7   0    3.65    0.37
  11   7   0    4.01    0.40
  11   7   0    3.44    0.57
  11   7   0    3.86    0.43
  11   7   0    3.75    0.58
  11   7   0    3.14    0.62
  11   7   0    4.06    0.42
  11   7   0    3.56    0.47
  11   7   0    4.11    0.43
  11   7   0    4.27    0.70
  11   7   0    3.83    0.53
 -11  -7   0    4.18    0.40
 -11  -7   0    3.93    0.37
 -11  -7   0    4.03    0.60
 -11  -7   0    4.49    0.40
 -11  -7   0    3.94    0.91
 -11  -7   0    2.90    0.59
 -11  -7   0    4.41    0.34
 -11  -7   0    2.54    0.49
 -11  -7   0    3.54    0.55
 -11  -7   0    3.94    0.38
 -11  -7   0    4.36    0.50
 -11  -7   0    3.77    0.37
  10   7   0   21.04    1.40
  10   7   0   20.97    1.43
  10   7   0   21.03    1.33
  10   7   0   21.56    1.53
  10   7   0   20.28    1.17
  10   7   0   21.26    1.23
  10   7   0   21.21    1.18
  10   7   0   19.07    1.54
  10   7   0   19.76    1.48
  10   7   0   20.70    1.25
  10   7   0   20.38    1.21
  10   7   0   18.64    1.34
  10   7   0   21.54    1.20
 -10  -7   0   19.56    1.34
 -10  -7   0   21.66    1.17
 -10  -7   0   20.26    1.42
 -10  -7   0   19.69    1.17
 -10  -7   0   21.35    1.24
 -10  -7   0   22.92    1.89
 -10  -7   0   22.29    1.17
 -10  -7   0   22.76    1.38
 -10  -7   0   22.06    1.28
 -10  -7   0   21.32    1.26
 -10  -7   0   21.81    1.42
 -10  -7   0   19.87    1.17
 -10  -7   0   21.90    1.20
 -10  -7   0   23.04    1.88
 -10  -7   0   20.16    1.13
 -10  -7   0   21.77    1.22
 -10  -7   0   21.10    1.49
 -10  -7   0   22.29    1.20
   9   7   0   47.28    3.08
   9   7   0   57.10    2.76
   9   7   0   54.13    2.76
   9   7   0   50.95    2.79
   9   7   0   54.22    2.74
   9   7   0   51.60    3.05
   9   7   0   56.44    3.84
   9   7   0   55.59    3.06
   9   7   0   58.51    3.01
   9   7   0   51.84    2.72
   9   7   0   56.04    2.79
   9   7   0   53.56    3.18
   9   7   0   51.45    2.90
   9   7   0   51.28    2.87
   9   7   0   53.71    2.94
  -9  -7   0   52.90    2.77
  -9  -7   0   60.40    3.48
  -9  -7   0   47.20    2.89
  -9  -7   0   53.58    2.74
  -9  -7   0   57.12    2.83
  -9  -7   0   55.82    3.49
  -9  -7   0   52.16    3.05
  -9  -7   0   53.04    2.73
  -9  -7   0   56.00    2.92
  -9  -7   0   50.42    2.81
  -9  -7   0   55.00    2.76
  -9  -7   0   57.49    2.73
  -9  -7   0   56.21    2.98
  -9  -7   0   52.15    2.69
  -9  -7   0   54.72    3.01
  -9  -7   0   54.63    2.77
  -9  -7   0   53.51    2.75
   8   7   0    6.44    0.46
   8   7   0    6.88    0.69
   8   7   0    6.74    0.83
   8   7   0    6.97    0.58
   8   7   0    6.88    0.79
   8   7   0    6.87    0.48
   8   7   0    6.72    1.25
   8   7   0    6.69    0.80
   8   7   0    5.77    0.63
   8   7   0    6.62    0.53
   8   7   0    8.16    0.69
   8   7   0    6.86    0.49
   8   7   0    5.86    0.48
   8   7   0    6.14    0.66
   8   7   0    6.51    0.49
  -8  -7   0    5.54    0.48
  -8  -7   0    7.32    0.49
  -8  -7   0    6.00    0.43
  -8  -7   0    7.36    0.55
  -8  -7   0    6.38    0.53
  -8  -7   0    7.87    0.63
  -8  -7   0    6.69    0.46
  -8  -7   0    6.12    0.95
  -8  -7   0    6.29    0.72
  -8  -7   0    6.28    0.47
  -8  -7   0    5.98    0.67
  -8  -7   0    6.39    0.46
  -8  -7   0    6.29    0.62
  -8  -7   0    6.29    0.48
  -8  -7   0    7.35    0.51
  -8  -7   0    7.25    0.97
  -8  -7   0    6.08    0.48
  -8  -7   0    6.65    0.71
   7   7   0    1.69    0.36
   7   7   0    1.77    0.29
   7   7   0    2.01    0.39
   7   7   0    2.13    0.48
   7   7   0    2.26    0.34
   7   7   0    2.65    0.29
   7   7   0    2.33    0.47
   7   7   0    1.39    0.41
   7   7   0    2.26    0.27
   7   7   0    2.34    0.27
   7   7   0    2.13    0.28
   7   7   0    0.77    0.58
   7   7   0    1.80    0.34
   7   7   0    2.34    0.26
   7   7   0    2.07    0.41
  -7  -7   0    2.39    0.29
  -7  -7   0    2.17    0.28
  -7  -7   0    2.34    0.25
  -7  -7   0    2.04    0.41
  -7  -7   0    2.38    0.27
  -7  -7   0    2.38    0.29
  -7  -7   0    2.56    0.41
  -7  -7   0    2.19    0.31
  -7  -7   0    1.85    0.27
  -7  -7   0    2.33    0.64
  -7  -7   0    2.29    0.41
  -7  -7   0    2.34    0.46
  -7  -7   0    2.04    0.56
  -7  -7   0    1.78    0.64
  -7  -7   0    2.65    0.26
  -7  -7   0    2.33    0.37
  -7  -7   0    2.35    0.28
  -7  -7   0    2.33    0.26
   6   7   0   48.10    2.76
   6   7   0   49.91    2.52
   6   7   0   52.51    2.71
   6   7   0   47.63    2.53
   6   7   0   53.57    2.90
   6   7   0   50.87    2.68
   6   7   0   46.11    2.60
   6   7   0   46.53    3.28
   6   7   0   49.49    2.51
   6   7   0   51.02    2.55
   6   7   0   52.49    2.55
   6   7   0   45.73    2.63
   6   7   0   49.98    2.75
   6   7   0   49.64    2.55
   6   7   0   48.17    2.82
  -6  -7   0   53.43    2.57
  -6  -7   0   53.25    2.56
  -6  -7   0   54.53    2.56
  -6  -7   0   54.13    2.72
  -6  -7   0   47.00    2.72
  -6  -7   0   53.78    2.66
  -6  -7   0   50.92    2.60
  -6  -7   0   50.76    2.53
  -6  -7   0   47.34    3.22
  -6  -7   0   46.63    2.69
  -6  -7   0   52.65    3.02
  -6  -7   0   47.59    2.55
  -6  -7   0   50.27    2.83
  -6  -7   0   49.02    2.50
  -6  -7   0   49.18    2.55
  -6  -7   0   53.85    2.54
  -6  -7   0   47.00    3.15
   5   7   0   12.87    0.99
   5   7   0   13.14    1.00
   5   7   0   13.09    0.74
   5   7   0   13.21    0.94
   5   7   0   13.59    0.74
   5   7   0   12.44    0.82
   5   7   0   12.31    0.71
   5   7   0   13.16    0.75
   5   7   0   12.57    0.72
   5   7   0    8.90    1.29
   5   7   0   11.95    0.88
   5   7   0   13.01    0.87
   5   7   0   14.13    0.86
   5   7   0   13.33    0.75
  -5  -7   0   13.34    0.73
  -5  -7   0   12.12    0.70
  -5  -7   0   12.54    0.75
  -5  -7   0   13.40    0.73
  -5  -7   0   11.31    1.21
  -5  -7   0   12.45    0.90
  -5  -7   0   13.99    0.75
  -5  -7   0   13.80    0.79
  -5  -7   0   12.77    0.87
  -5  -7   0   12.09    0.75
  -5  -7   0   14.30    1.31
  -5  -7   0   11.35    0.96
  -5  -7   0   12.31    0.75
  -5  -7   0   11.52    0.87
  -5  -7   0   12.77    0.82
  -5  -7   0   13.70    1.10
  -5  -7   0   12.44    0.75
   4   7   0    2.31    0.33
   4   7   0    3.75    0.29
   4   7   0    2.99    0.26
   4   7   0    3.49    0.40
   4   7   0    2.80    0.29
   4   7   0    3.65    0.30
   4   7   0    3.69    0.51
   4   7   0    2.48    0.37
   4   7   0    2.34    0.40
   4   7   0    3.09    0.27
   4   7   0    3.39    0.74
   4   7   0    3.00    0.24
   4   7   0    3.14    0.39
   4   7   0    2.97    0.20
  -4  -7   0    2.74    0.25
  -4  -7   0    4.13    0.54
  -4  -7   0    3.56    0.57
  -4  -7   0    2.75    0.37
  -4  -7   0    3.41    0.28
  -4  -7   0    3.85    0.71
  -4  -7   0    2.98    0.28
  -4  -7   0    2.95    0.41
  -4  -7   0    3.29    0.42
  -4  -7   0    3.08    0.25
  -4  -7   0    2.06    0.58
  -4  -7   0    3.33    0.30
  -4  -7   0    3.02    0.27
  -4  -7   0    3.01    0.28
  -4  -7   0    3.49    0.27
  -4  -7   0    2.86    0.30
  -4  -7   0    3.56    0.37
   3   7   0   68.73    3.82
   3   7   0   72.25    4.25
   3   7   0   76.61    3.68
   3   7   0   75.72    3.78
   3   7   0   74.19    3.65
   3   7   0   71.99    3.90
   3   7   0   74.09    3.92
   3   7   0   80.28    3.80
   3   7   0   76.01    3.69
   3   7   0   74.83    3.68
   3   7   0   74.90    3.67
   3   7   0   73.03    3.70
   3   7   0   74.09    3.63
   3   7   0   70.40    3.72
   3   7   0   72.60    3.82
   3   7   0   71.22    3.75
  -3  -7   0   78.10    3.70
  -3  -7   0   70.84    3.81
  -3  -7   0   75.67    3.69
  -3  -7   0   76.83    3.72
  -3  -7   0   78.36    3.75
  -3  -7   0   73.75    3.67
  -3  -7   0   78.34    3.81
  -3  -7   0   72.48    3.93
  -3  -7   0   75.79    4.00
  -3  -7   0   73.52    3.70
  -3  -7   0   84.95    4.27
  -3  -7   0   76.59    3.68
  -3  -7   0   68.53    3.65
  -3  -7   0   79.78    3.69
  -3  -7   0   71.89    3.69
   2   7   0    0.12    0.19
   2   7   0    0.01    0.10
   2   7   0   -0.06    0.14
   2   7   0    0.16    0.13
   2   7   0    0.05    0.11
   2   7   0    0.12    0.17
   2   7   0   -0.06    0.08
   2   7   0    0.07    0.08
   2   7   0    0.36    0.33
   2   7   0   -0.01    0.04
   2   7   0   -0.10    0.13
   2   7   0   -0.12    0.08
   2   7   0    0.17    0.09
   2   7   0    0.14    0.13
   2   7   0    0.10    0.07
  -2  -7   0    0.25    0.11
  -2  -7   0    0.24    0.11
  -2  -7   0    0.41    0.14
  -2  -7   0    0.04    0.07
  -2  -7   0   -0.03    0.13
  -2  -7   0    0.15    0.09
  -2  -7   0   -0.02    0.17
  -2  -7   0    0.26    0.13
  -2  -7   0    0.12    0.16
  -2  -7   0   -0.06    0.23
  -2  -7   0    0.05    0.08
  -2  -7   0    0.05    0.09
  -2  -7   0    0.13    0.08
  -2  -7   0    0.29    0.31
  -2  -7   0    0.12    0.11
  -2  -7   0    0.21    0.10
  -2  -7   0    0.04    0.16
   1   7   0   75.68    3.85
   1   7   0   82.87    3.95
   1   7   0   76.64    3.92
   1   7   0   75.88    3.91
   1   7   0   80.68    3.83
   1   7   0   75.86    3.89
   1   7   0   81.87    3.85
   1   7   0   76.77    3.84
   1   7   0   74.91    3.97
   1   7   0   82.65    4.36
   1   7   0   81.46    3.84
   1   7   0   79.08    3.97
   1   7   0   79.33    4.04
   1   7   0   79.64    3.85
   1   7   0   78.80    3.87
   1   7   0   82.73    4.08
  -1  -7   0   75.84    4.08
  -1  -7   0   84.07    3.90
  -1  -7   0   68.61    3.94
  -1  -7   0   78.27    4.09
  -1  -7   0   79.66    3.89
  -1  -7   0   74.60    3.97
  -1  -7   0   79.17    3.87
  -1  -7   0   79.70    3.85
  -1  -7   0   77.50    3.87
  -1  -7   0   85.58    3.98
  -1  -7   0   80.67    3.91
  -1  -7   0   76.84    3.88
  -1  -7   0   76.35    3.85
  -1  -7   0   80.36    3.87
  -1  -7   0   81.42    4.26
   0   7   0    0.20    0.25
   0   7   0   -0.06    0.12
   0   7   0    0.14    0.08
   0   7   0   -0.03    0.06
   0   7   0    0.06    0.10
   0   7   0    0.06    0.14
   0   7   0   -0.04    0.07
   0   7   0   -0.05    0.07
   0   7   0   -0.03    0.06
   0   7   0    0.03    0.10
   0   7   0   -0.09    0.12
   0   7   0    0.00    0.07
   0   7   0    0.05    0.10
   0   7   0    0.15    0.09
   0   7   0    0.08    0.05
   0   7   0    0.09    0.07
   0   7   0   -0.07    0.13
   0  -7   0    0.18    0.16
   0  -7   0    0.10    0.11
   0  -7   0    0.12    0.07
   0  -7   0    0.13    0.12
   0  -7   0    0.32    0.10
   0  -7   0   -0.02    0.10
   0  -7   0    0.35    0.20
   0  -7   0    0.02    0.10
   0  -7   0   -0.06    0.17
   0  -7   0   -0.17    0.10
   0  -7   0    0.06    0.14
   0  -7   0    0.05    0.07
   0  -7   0    0.02    0.06
   0  -7   0   -0.03    0.08
   0  -7   0    0.06    0.08
  -1   7   0   82.03    3.93
  -1   7   0   82.87    4.15
  -1   7   0   77.52    3.96
  -1   7   0   77.07    3.99
  -1   7   0   83.52    3.93
  -1   7   0   76.77    3.94
  -1   7   0   78.64    4.04
  -1   7   0   77.52    4.00
  -1   7   0   75.89    3.93
  -1   7   0   90.89    4.12
  -1   7   0   85.87    3.94
  -1   7   0   90.35    4.13
  -1   7   0   82.43    4.05
  -1   7   0   75.15    3.97
  -1   7   0   78.49    4.32
  -1   7   0   77.90    3.93
  -1   7   0   79.94    4.05
  -1   7   0   81.26    3.91
   1  -7   0   83.55    3.96
   1  -7   0   80.71    3.97
   1  -7   0   80.13    3.98
   1  -7   0   77.89    3.95
   1  -7   0   79.44    3.96
   1  -7   0   80.84    3.99
   1  -7   0   82.82    4.27
   1  -7   0   85.04    3.97
   1  -7   0   76.83    4.15
   1  -7   0   85.37    3.99
   1  -7   0   83.45    4.15
   1  -7   0   82.20    4.05
   1  -7   0   78.02    4.06
   1  -7   0   82.42    4.06
   1  -7   0   81.87    3.97
  -2   7   0    0.05    0.07
  -2   7   0    0.10    0.13
  -2   7   0    0.05    0.06
  -2   7   0    0.44    0.25
  -2   7   0    0.25    0.14
  -2   7   0    0.15    0.10
  -2   7   0    0.15    0.14
  -2   7   0    0.05    0.09
  -2   7   0    0.09    0.13
  -2   7   0    0.10    0.07
  -2   7   0    0.06    0.03
  -2   7   0    0.09    0.11
  -2   7   0    0.08    0.09
  -2   7   0    0.04    0.06
  -2   7   0    0.12    0.06
  -2   7   0    0.04    0.06
  -2   7   0    0.16    0.13
   2  -7   0    0.06    0.07
   2  -7   0   -0.02    0.09
   2  -7   0    0.10    0.10
   2  -7   0    0.17    0.09
   2  -7   0    0.25    0.11
   2  -7   0    0.17    0.08
   2  -7   0    0.00    0.09
   2  -7   0    0.35    0.16
   2  -7   0   -0.03    0.06
   2  -7   0    0.29    0.16
   2  -7   0    0.07    0.13
   2  -7   0    0.14    0.18
   2  -7   0    0.05    0.17
   2  -7   0    0.21    0.10
   2  -7   0    0.14    0.08
  -3   7   0   80.11    4.01
  -3   7   0   81.42    3.92
  -3   7   0   73.58    3.77
  -3   7   0   78.31    3.76
  -3   7   0   77.57    3.89
  -3   7   0   74.61    3.83
  -3   7   0   73.56    3.81
  -3   7   0   71.89    3.82
  -3   7   0   83.50    4.17
  -3   7   0   77.25    3.79
  -3   7   0   75.15    3.76
  -3   7   0   90.60    4.02
  -3   7   0   75.30    3.88
  -3   7   0   76.60    3.87
  -3   7   0   73.74    3.81
  -3   7   0   85.97    3.86
  -3   7   0   72.32    3.76
   3  -7   0   78.66    3.91
   3  -7   0   75.77    3.87
   3  -7   0   78.04    4.09
   3  -7   0   78.62    3.81
   3  -7   0   74.55    3.81
   3  -7   0   74.91    3.97
   3  -7   0   81.04    3.83
   3  -7   0   78.52    3.79
   3  -7   0   78.61    3.82
   3  -7   0   80.57    3.90
   3  -7   0   76.18    3.99
   3  -7   0   75.20    3.80
   3  -7   0   79.35    3.80
   3  -7   0   81.93    3.91
   3  -7   0   79.96    3.81
  -4   7   0    3.36    0.23
  -4   7   0    3.76    0.26
  -4   7   0    3.42    0.30
  -4   7   0    3.11    0.33
  -4   7   0    3.34    0.27
  -4   7   0    3.06    0.27
  -4   7   0    3.25    0.21
  -4   7   0    3.23    0.28
  -4   7   0    3.25    0.43
  -4   7   0    4.36    0.36
  -4   7   0    3.03    0.25
  -4   7   0    3.50    0.36
  -4   7   0    2.97    0.20
  -4   7   0    3.36    0.20
  -4   7   0    3.14    0.20
  -4   7   0    3.60    0.55
  -4   7   0    3.43    0.30
  -4   7   0    3.06    0.18
   4  -7   0    3.09    0.23
   4  -7   0    3.29    0.25
   4  -7   0    2.95    0.24
   4  -7   0    3.44    0.37
   4  -7   0    3.53    0.28
   4  -7   0    3.44    0.38
   4  -7   0    3.49    0.38
   4  -7   0    3.53    0.31
   4  -7   0    3.30    0.26
   4  -7   0    3.35    0.25
   4  -7   0    3.04    0.23
   4  -7   0    3.30    0.55
   4  -7   0    2.90    0.25
   4  -7   0    3.55    0.43
   4  -7   0    2.89    0.25
   4  -7   0    3.62    0.34
  -5   7   0   12.82    0.67
  -5   7   0   13.65    0.73
  -5   7   0   13.27    0.67
  -5   7   0   13.49    0.84
  -5   7   0   12.57    0.76
  -5   7   0   13.61    0.79
  -5   7   0   13.36    0.75
  -5   7   0   13.84    1.06
  -5   7   0   12.79    0.71
  -5   7   0   12.34    0.66
  -5   7   0   13.06    0.78
  -5   7   0   13.22    0.76
  -5   7   0   12.78    0.73
  -5   7   0   12.67    0.66
  -5   7   0   14.67    0.83
   5  -7   0   13.71    0.73
   5  -7   0   13.32    0.69
   5  -7   0   13.42    0.77
   5  -7   0   12.27    0.84
   5  -7   0   13.63    0.74
   5  -7   0   14.84    0.74
   5  -7   0   15.77    0.85
   5  -7   0   13.46    0.85
   5  -7   0   15.00    0.94
   5  -7   0   13.79    0.75
   5  -7   0   12.86    0.90
   5  -7   0   13.42    0.80
   5  -7   0   13.16    0.71
   5  -7   0   14.11    0.73
   5  -7   0   12.91    0.74
  -6   7   0   57.04    2.81
  -6   7   0   50.45    2.66
  -6   7   0   51.18    2.68
  -6   7   0   52.49    2.74
  -6   7   0   54.16    2.75
  -6   7   0   53.05    2.68
  -6   7   0   54.71    3.05
  -6   7   0   52.02    2.78
  -6   7   0   52.80    2.65
  -6   7   0   52.32    2.71
  -6   7   0   52.76    2.72
   6  -7   0   58.05    2.78
   6  -7   0   53.10    2.59
   6  -7   0   51.49    2.66
   6  -7   0   55.14    2.67
   6  -7   0   53.95    2.77
   6  -7   0   55.16    2.87
   6  -7   0   52.12    2.70
   6  -7   0   54.58    2.66
   6  -7   0   52.77    2.79
   6  -7   0   57.64    2.76
   6  -7   0   52.49    2.65
   6  -7   0   52.72    2.67
   6  -7   0   53.06    2.64
   6  -7   0   52.71    2.65
   6  -7   0   53.68    2.79
  -7   7   0    2.37    0.51
  -7   7   0    2.13    0.25
  -7   7   0    2.02    0.21
  -7   7   0    2.07    0.27
  -7   7   0    2.03    0.26
  -7   7   0    1.87    0.31
  -7   7   0    2.49    0.37
  -7   7   0    2.27    0.32
  -7   7   0    3.32    0.75
  -7   7   0    2.69    0.31
  -7   7   0    2.12    0.25
   7  -7   0    2.17    0.21
   7  -7   0    2.62    0.38
   7  -7   0    2.18    0.26
   7  -7   0    2.29    0.29
   7  -7   0    2.14    0.23
   7  -7   0    2.21    0.23
   7  -7   0    2.32    0.36
   7  -7   0    2.96    0.24
   7  -7   0    2.33    0.24
   7  -7   0    2.19    0.39
   7  -7   0    2.40    0.32
   7  -7   0    2.36    0.33
   7  -7   0    2.32    0.34
  -8   7   0    6.73    0.50
  -8   7   0    5.78    0.62
  -8   7   0    7.35    0.51
  -8   7   0    6.28    0.50
  -8   7   0    7.35    0.51
  -8   7   0    7.36    0.83
  -8   7   0    6.42    0.54
  -8   7   0    7.94    1.18
  -8   7   0    7.56    0.48
   8  -7   0    7.63    0.69
   8  -7   0    8.11    0.59
   8  -7   0    7.00    0.59
   8  -7   0    7.08    0.52
   8  -7   0    7.18    0.48
   8  -7   0    7.42    0.62
   8  -7   0    7.27    0.47
   8  -7   0    7.59    0.59
   8  -7   0    7.29    0.50
   8  -7   0    7.13    0.46
   8  -7   0    6.32    0.43
  -9   7   0   56.73    2.88
  -9   7   0   53.49    2.92
  -9   7   0   56.37    3.36
  -9   7   0   54.32    2.90
  -9   7   0   56.89    2.98
  -9   7   0   68.14    3.86
  -9   7   0   53.62    3.03
  -9   7   0   55.60    2.92
   9  -7   0   64.20    3.19
   9  -7   0   62.68    3.03
   9  -7   0   54.94    2.90
   9  -7   0   58.06    3.02
   9  -7   0   56.90    2.94
   9  -7   0   58.51    3.06
   9  -7   0   58.39    2.88
   9  -7   0   56.75    2.85
   9  -7   0   59.60    2.91
   9  -7   0   56.87    2.88
   9  -7   0   53.06    3.03
 -10   7   0   22.18    1.20
 -10   7   0   22.61    1.32
 -10   7   0   22.22    1.24
 -10   7   0   24.14    2.09
 -10   7   0   23.70    1.73
 -10   7   0   21.17    1.37
  10  -7   0   19.74    1.37
  10  -7   0   21.42    1.17
  10  -7   0   20.80    1.20
  10  -7   0   22.22    1.23
  10  -7   0   20.81    1.20
  10  -7   0   22.73    1.40
  10  -7   0   21.13    1.23
  10  -7   0   23.49    1.39
  10  -7   0   23.10    1.49
  10  -7   0   22.37    1.36
 -11   7   0    3.83    1.01
 -11   7   0    4.44    0.52
 -11   7   0    4.32    0.59
 -11   7   0    4.51    0.45
 -11   7   0    4.72    0.67
 -11   7   0    6.68    0.99
 -11   7   0    4.28    0.38
  11  -7   0    5.31    0.70
  11  -7   0    4.98    0.58
  11  -7   0    5.15    0.61
  11  -7   0    4.42    0.45
  11  -7   0    4.40    0.40
  11  -7   0    3.64    0.55
  11  -7   0    4.31    0.58
  11  -7   0    3.94    0.35
  11  -7   0    4.42    0.45
 -12   7   0    3.78    0.81
 -12   7   0    4.02    0.52
 -12   7   0    3.90    1.11
 -12   7   0    3.29    0.41
 -12   7   0    4.43    0.38
 -12   7   0    4.49    0.69
 -12   7   0    4.05    0.58
  12  -7   0    4.67    0.69
  12  -7   0    3.67    0.58
  12  -7   0    4.85    0.62
  12  -7   0    4.32    0.61
  12  -7   0    3.17    0.36
  12  -7   0    4.52    0.43
  12  -7   0    4.34    0.47
 -13   7   0   22.92    2.42
 -13   7   0   24.78    1.31
 -13   7   0   23.32    1.47
 -13   7   0   21.90    1.54
 -13   7   0   28.24    2.09
 -13   7   0   22.38    1.63
 -13   7   0   23.16    1.37
  13  -7   0   22.19    1.58
  13  -7   0   19.72    1.54
  13  -7   0   23.48    1.32
  13  -7   0   24.89    1.40
  13  -7   0   23.82    1.37
  13  -7   0   25.23    1.57
  13  -7   0   26.88    1.76
 -14   7   0   -0.16    0.26
 -14   7   0   -0.43    0.27
 -14   7   0   -0.21    0.15
 -14   7   0   -0.09    0.27
  14  -7   0   -0.01    0.21
  14  -7   0   -0.12    0.32
  14  -7   0   -0.21    0.28
 -15   7   0    0.81    0.45
 -15   7   0    0.70    0.37
 -15   7   0    0.92    0.41
 -15   7   0    0.76    0.21
  15  -7   0    0.79    0.29
  15  -7   0    1.00    0.43
 -16   7   0   20.63    1.69
 -16   7   0   20.76    1.45
 -16   7   0   19.28    1.50
  16  -7   0   20.55    1.33
  16  -7   0   22.49    1.53
 -17   7   0    0.48    0.40
 -17   7   0    0.06    0.46
 -17   7   0    0.34    0.38
  17  -7   0    0.14    0.42
  17  -7   0    1.22    0.36
  17   8   0   27.48    2.17
  17   8   0   24.73    1.59
  17   8   0   25.21    1.60
  17   8   0   24.58    1.92
  17   8   0   25.51    1.88
  17   8   0   26.90    1.70
 -17  -8   0   29.27    2.74
 -17  -8   0   31.32    2.09
 -17  -8   0   25.24    1.38
 -17  -8   0   26.84    1.45
 -17  -8   0   28.63    1.74
  16   8   0   14.33    1.48
  16   8   0   15.90    1.10
  16   8   0   15.58    1.17
  16   8   0   17.57    1.81
  16   8   0   15.15    1.09
  16   8   0   16.97    1.38
 -16  -8   0   17.85    2.01
 -16  -8   0   16.77    0.92
 -16  -8   0   16.32    1.47
 -16  -8   0   15.79    0.91
 -16  -8   0   16.74    0.99
 -16  -8   0   16.68    1.24
 -16  -8   0   17.04    0.99
 -16  -8   0   16.34    0.92
  15   8   0   24.68    1.74
  15   8   0   25.80    1.99
  15   8   0   26.00    1.50
  15   8   0   26.29    1.58
  15   8   0   22.28    1.75
  15   8   0   24.03    1.48
 -15  -8   0   24.52    1.64
 -15  -8   0   22.88    1.82
 -15  -8   0   24.94    1.41
 -15  -8   0   26.11    1.35
 -15  -8   0   24.02    1.39
 -15  -8   0   24.79    1.33
 -15  -8   0   25.62    1.35
 -15  -8   0   25.45    2.39
  14   8   0   25.26    1.52
  14   8   0   25.59    1.52
  14   8   0   26.09    1.60
  14   8   0   24.72    1.96
  14   8   0   23.67    1.74
  14   8   0   28.00    1.63
  14   8   0   24.52    1.79
 -14  -8   0   25.93    1.42
 -14  -8   0   26.47    1.46
 -14  -8   0   28.80    1.44
 -14  -8   0   30.09    2.52
 -14  -8   0   25.06    1.39
 -14  -8   0   27.10    1.48
 -14  -8   0   24.06    1.84
 -14  -8   0   26.67    1.69
  13   8   0    0.63    0.29
  13   8   0    0.20    0.34
  13   8   0   -0.08    0.41
  13   8   0    0.15    0.23
  13   8   0    0.47    0.23
  13   8   0    0.19    0.24
  13   8   0   -0.33    0.32
 -13  -8   0    0.39    0.18
 -13  -8   0    0.35    0.20
 -13  -8   0    0.05    0.29
 -13  -8   0    0.26    0.17
 -13  -8   0    0.18    0.18
 -13  -8   0    0.17    0.15
 -13  -8   0    0.01    0.37
 -13  -8   0    0.29    0.29
 -13  -8   0    0.48    0.54
  12   8   0   53.51    3.23
  12   8   0   61.43    3.07
  12   8   0   50.26    3.39
  12   8   0   59.98    3.31
  12   8   0   57.73    3.02
  12   8   0   59.58    3.04
  12   8   0   59.32    3.11
  12   8   0   56.79    3.01
 -12  -8   0   59.95    2.99
 -12  -8   0   57.51    3.23
 -12  -8   0   61.75    3.03
 -12  -8   0   60.43    2.99
 -12  -8   0   59.88    3.38
 -12  -8   0   58.89    3.24
 -12  -8   0   57.70    2.94
 -12  -8   0   56.56    3.18
 -12  -8   0   61.85    3.97
  11   8   0    1.19    0.40
  11   8   0    1.08    0.31
  11   8   0    1.44    0.30
  11   8   0    1.36    0.28
  11   8   0    1.25    0.26
  11   8   0    0.98    0.27
  11   8   0    1.36    0.41
  11   8   0    1.38    0.47
 -11  -8   0    1.06    0.24
 -11  -8   0    1.07    0.38
 -11  -8   0    1.19    0.21
 -11  -8   0    1.18    0.38
 -11  -8   0    1.65    0.28
 -11  -8   0    1.15    0.28
 -11  -8   0    1.86    0.44
 -11  -8   0    1.14    0.25
 -11  -8   0    1.20    0.24
 -11  -8   0    0.83    0.43
 -11  -8   0    1.34    0.62
  10   8   0   28.65    1.74
  10   8   0   28.19    2.05
  10   8   0   24.49    1.87
  10   8   0   27.17    1.83
  10   8   0   27.90    1.53
  10   8   0   26.58    1.85
  10   8   0   25.76    1.67
  10   8   0   27.80    1.49
  10   8   0   27.31    1.56
  10   8   0   25.69    1.63
  10   8   0   26.93    1.48
  10   8   0   28.55    1.51
 -10  -8   0   28.16    1.74
 -10  -8   0   27.09    1.50
 -10  -8   0   23.80    1.66
 -10  -8   0   28.34    1.59
 -10  -8   0   29.56    1.70
 -10  -8   0   27.76    1.48
 -10  -8   0   26.66    1.44
 -10  -8   0   27.81    1.80
 -10  -8   0   27.26    1.49
 -10  -8   0   28.54    1.52
 -10  -8   0   27.45    1.50
 -10  -8   0   28.16    1.51
 -10  -8   0   25.88    1.58
 -10  -8   0   28.68    2.26
   9   8   0   35.73    1.95
   9   8   0   35.74    1.91
   9   8   0   31.67    2.04
   9   8   0   35.78    2.33
   9   8   0   32.49    2.25
   9   8   0   41.66    2.19
   9   8   0   31.58    2.18
   9   8   0   35.68    1.87
   9   8   0   34.19    2.01
   9   8   0   35.74    1.92
   9   8   0   31.87    3.42
   9   8   0   35.50    1.88
   9   8   0   36.64    2.21
   9   8   0   33.03    2.04
   9   8   0   35.98    1.90
  -9  -8   0   37.37    1.88
  -9  -8   0   36.02    1.84
  -9  -8   0   35.11    2.08
  -9  -8   0   36.08    1.91
  -9  -8   0   37.14    2.65
  -9  -8   0   37.91    2.07
  -9  -8   0   37.30    1.88
  -9  -8   0   37.39    1.90
  -9  -8   0   32.71    1.96
  -9  -8   0   37.97    1.93
  -9  -8   0   35.09    1.90
  -9  -8   0   33.53    2.50
  -9  -8   0   33.75    2.79
  -9  -8   0   37.88    2.25
  -9  -8   0   30.44    2.05
  -9  -8   0   37.94    1.91
  -9  -8   0   35.12    2.14
  -9  -8   0   36.24    2.11
  -9  -8   0   40.06    2.00
   8   8   0    2.38    0.29
   8   8   0    1.49    0.26
   8   8   0    1.55    0.25
   8   8   0    1.64    0.32
   8   8   0    1.36    0.45
   8   8   0    0.96    0.42
   8   8   0    1.83    0.41
   8   8   0    1.48    0.29
   8   8   0    2.07    0.82
   8   8   0    1.68    0.40
   8   8   0    1.51    0.23
   8   8   0    2.10    0.29
   8   8   0    1.01    0.42
   8   8   0    1.65    0.39
   8   8   0    1.45    0.35
  -8  -8   0    1.49    0.24
  -8  -8   0    2.12    0.45
  -8  -8   0    1.42    0.26
  -8  -8   0    2.02    0.32
  -8  -8   0    1.73    0.64
  -8  -8   0    1.92    0.38
  -8  -8   0    1.79    0.27
  -8  -8   0    1.58    0.55
  -8  -8   0    1.49    0.42
  -8  -8   0    2.12    0.47
  -8  -8   0    1.58    0.26
  -8  -8   0    1.56    0.30
  -8  -8   0    1.62    0.70
  -8  -8   0    1.87    0.28
  -8  -8   0    1.92    0.24
  -8  -8   0    2.05    0.30
  -8  -8   0    1.57    0.35
   7   8   0   14.93    0.89
   7   8   0   14.88    0.93
   7   8   0   16.63    1.09
   7   8   0   15.48    1.22
   7   8   0   16.80    0.93
   7   8   0   16.09    0.91
   7   8   0   15.32    1.22
   7   8   0   14.11    0.86
   7   8   0   15.16    1.65
   7   8   0   14.23    1.10
   7   8   0   14.70    0.98
   7   8   0   14.75    1.15
   7   8   0   14.92    1.02
   7   8   0   14.88    0.89
   7   8   0   14.81    1.05
  -7  -8   0   14.29    1.06
  -7  -8   0   15.80    0.87
  -7  -8   0   16.66    1.62
  -7  -8   0   14.95    1.18
  -7  -8   0   17.05    1.10
  -7  -8   0   15.69    0.96
  -7  -8   0   14.95    0.92
  -7  -8   0   15.70    0.88
  -7  -8   0   14.88    1.11
  -7  -8   0   17.43    0.94
  -7  -8   0   16.43    0.93
  -7  -8   0   15.04    0.92
  -7  -8   0   16.25    1.03
  -7  -8   0   14.83    1.48
  -7  -8   0   14.93    0.90
  -7  -8   0   16.18    1.38
   6   8   0   11.49    1.53
   6   8   0    9.70    0.87
   6   8   0    9.51    0.91
   6   8   0   11.42    0.66
   6   8   0   10.41    0.64
   6   8   0   10.09    0.66
   6   8   0   10.78    0.80
   6   8   0    9.63    0.90
   6   8   0   10.23    0.84
   6   8   0   10.34    0.66
   6   8   0   10.26    0.80
   6   8   0   10.95    0.68
   6   8   0   10.07    0.62
   6   8   0   10.93    0.77
  -6  -8   0   10.61    0.81
  -6  -8   0   10.73    0.67
  -6  -8   0   10.16    0.92
  -6  -8   0   11.41    0.76
  -6  -8   0    9.71    0.67
  -6  -8   0    9.77    0.82
  -6  -8   0   11.25    0.69
  -6  -8   0   11.00    0.68
  -6  -8   0    9.89    0.84
  -6  -8   0   11.76    0.65
  -6  -8   0   10.56    1.40
  -6  -8   0   11.22    0.72
  -6  -8   0    9.17    1.15
  -6  -8   0   12.37    0.68
  -6  -8   0    9.69    0.62
  -6  -8   0   11.34    1.07
   5   8   0   75.60    4.09
   5   8   0   69.90    3.99
   5   8   0   76.87    3.78
   5   8   0   78.65    3.80
   5   8   0   73.32    3.89
   5   8   0   70.90    4.55
   5   8   0   82.10    3.94
   5   8   0   75.76    3.76
   5   8   0   79.47    3.80
   5   8   0   76.68    3.79
   5   8   0   78.37    3.94
   5   8   0   70.56    3.97
  -5  -8   0   78.77    4.00
  -5  -8   0   78.99    3.78
  -5  -8   0   80.89    4.53
  -5  -8   0   75.71    4.11
  -5  -8   0   64.84    4.45
  -5  -8   0   75.68    3.81
  -5  -8   0   78.77    3.89
  -5  -8   0   75.45    4.23
  -5  -8   0   80.53    3.85
  -5  -8   0   75.17    3.76
  -5  -8   0   74.72    3.81
  -5  -8   0   73.51    3.96
  -5  -8   0   79.05    3.80
  -5  -8   0   78.00    3.81
  -5  -8   0   78.59    3.81
  -5  -8   0   78.62    3.96
   4   8   0    1.28    0.28
   4   8   0    1.43    0.18
   4   8   0    1.86    0.23
   4   8   0    1.70    0.21
   4   8   0    1.23    0.55
   4   8   0    1.63    0.20
   4   8   0    1.62    0.28
   4   8   0    1.19    0.30
   4   8   0    1.72    0.39
   4   8   0    1.47    0.22
   4   8   0    1.42    0.24
   4   8   0    1.41    0.30
   4   8   0    1.61    0.30
   4   8   0    0.48    0.24
   4   8   0    1.38    0.13
   4   8   0    1.14    0.20
  -4  -8   0    1.92    0.28
  -4  -8   0    1.44    0.20
  -4  -8   0    1.50    0.22
  -4  -8   0    1.28    0.36
  -4  -8   0    1.63    0.22
  -4  -8   0    1.20    0.21
  -4  -8   0    1.14    0.30
  -4  -8   0    1.08    0.50
  -4  -8   0    1.32    0.18
  -4  -8   0    1.46    0.19
  -4  -8   0    1.38    0.21
  -4  -8   0    1.39    0.28
  -4  -8   0    1.38    0.22
  -4  -8   0    1.91    0.37
  -4  -8   0    1.49    0.51
  -4  -8   0    1.43    0.41
   3   8   0   46.98    2.31
   3   8   0   43.23    2.36
   3   8   0   45.77    2.28
   3   8   0   47.63    2.59
   3   8   0   44.15    2.29
   3   8   0   45.25    2.25
   3   8   0   43.30    2.47
   3   8   0   41.61    2.32
   3   8   0   46.80    2.56
   3   8   0   41.83    2.38
   3   8   0   44.03    2.46
   3   8   0   48.72    2.44
   3   8   0   48.17    2.32
   3   8   0   44.67    2.93
  -3  -8   0   46.94    2.33
  -3  -8   0   48.42    2.36
  -3  -8   0   44.15    2.32
  -3  -8   0   52.60    2.41
  -3  -8   0   42.42    2.45
  -3  -8   0   47.64    2.45
  -3  -8   0   49.37    2.88
  -3  -8   0   45.45    2.29
  -3  -8   0   45.39    2.30
  -3  -8   0   47.89    2.33
  -3  -8   0   45.64    2.64
  -3  -8   0   43.30    2.58
  -3  -8   0   45.18    2.33
  -3  -8   0   47.37    2.32
   2   8   0  128.20    6.74
   2   8   0  129.05    6.77
   2   8   0  142.13    6.71
   2   8   0  142.03    6.86
   2   8   0  142.17    6.82
   2   8   0  137.44    6.94
   2   8   0  135.65    6.67
   2   8   0  153.72    6.76
   2   8   0  136.39    6.70
   2   8   0  125.93    6.85
   2   8   0  134.14    6.69
   2   8   0  131.44    6.72
   2   8   0  143.31    6.98
   2   8   0  140.19    6.70
   2   8   0  138.58    7.32
  -2  -8   0  139.02    6.75
  -2  -8   0  137.29    6.70
  -2  -8   0  135.40    6.73
  -2  -8   0  144.42    6.72
  -2  -8   0  128.24    6.97
  -2  -8   0  128.65    6.84
  -2  -8   0  147.08    6.73
  -2  -8   0  132.91    6.72
  -2  -8   0  132.00    6.69
  -2  -8   0  134.78    6.73
  -2  -8   0  143.62    7.04
  -2  -8   0  153.97    7.27
  -2  -8   0  144.91    6.78
   1   8   0   13.05    0.95
   1   8   0   12.55    0.73
   1   8   0   13.00    0.74
   1   8   0   13.33    0.86
   1   8   0   12.45    0.80
   1   8   0   15.25    0.74
   1   8   0   12.78    0.78
   1   8   0   13.51    0.82
   1   8   0   12.50    0.75
   1   8   0   13.57    0.85
   1   8   0   13.22    0.71
   1   8   0   13.38    0.73
   1   8   0   12.54    1.16
   1   8   0   13.22    0.88
   1   8   0   14.20    0.95
   1   8   0   14.69    0.75
  -1  -8   0   14.08    0.76
  -1  -8   0   13.36    0.78
  -1  -8   0   13.27    1.10
  -1  -8   0   13.90    0.77
  -1  -8   0   14.23    0.81
  -1  -8   0   13.06    0.74
  -1  -8   0   14.43    0.79
  -1  -8   0   12.28    0.87
  -1  -8   0   13.28    0.98
  -1  -8   0   13.59    0.99
  -1  -8   0   13.49    0.85
  -1  -8   0   12.92    0.79
  -1  -8   0   14.63    0.75
  -1  -8   0   14.26    0.78
   0   8   0   29.94    1.51
   0   8   0   31.13    1.50
   0   8   0   28.85    1.51
   0   8   0   30.24    1.51
   0   8   0   29.87    1.49
   0   8   0   28.80    1.65
   0   8   0   27.39    1.58
   0   8   0   32.03    2.01
   0   8   0   31.26    1.63
   0   8   0   31.10    1.51
   0   8   0   30.15    1.60
   0   8   0   28.76    1.52
   0   8   0   29.13    1.63
   0   8   0   30.23    1.54
   0   8   0   32.72    1.77
   0   8   0   32.07    1.72
   0   8   0   27.69    1.56
   0  -8   0   29.80    1.52
   0  -8   0   31.03    1.90
   0  -8   0   31.32    1.64
   0  -8   0   31.33    1.57
   0  -8   0   30.85    1.58
   0  -8   0   29.02    1.54
   0  -8   0   31.02    1.77
   0  -8   0   29.64    1.54
   0  -8   0   29.60    1.53
   0  -8   0   31.43    1.57
   0  -8   0   30.45    1.58
   0  -8   0   29.69    1.64
   0  -8   0   27.11    1.65
   0  -8   0   29.29    1.55
   0  -8   0   28.77    1.77
  -1   8   0   12.69    0.85
  -1   8   0   13.03    0.80
  -1   8   0   14.48    1.15
  -1   8   0   14.38    0.72
  -1   8   0   13.79    0.85
  -1   8   0   13.18    0.73
  -1   8   0   12.92    0.84
  -1   8   0   13.19    0.79
  -1   8   0   13.62    0.76
  -1   8   0   14.63    0.91
  -1   8   0   13.48    0.73
  -1   8   0   14.36    0.72
  -1   8   0   13.77    0.95
  -1   8   0   15.21    0.72
  -1   8   0   11.91    0.76
  -1   8   0   13.17    0.73
  -1   8   0   14.09    0.70
   1  -8   0   12.91    0.87
   1  -8   0   14.23    0.77
   1  -8   0   12.64    0.96
   1  -8   0   13.21    0.74
   1  -8   0   13.72    0.76
   1  -8   0   14.25    0.85
   1  -8   0   15.24    0.78
   1  -8   0   13.97    1.05
   1  -8   0   13.90    0.76
   1  -8   0   14.25    0.80
   1  -8   0   14.02    0.78
   1  -8   0   13.98    0.79
   1  -8   0   13.11    0.94
   1  -8   0   13.87    0.79
   1  -8   0   13.66    0.86
  -2   8   0  144.15    6.80
  -2   8   0  145.00    6.75
  -2   8   0  141.71    6.83
  -2   8   0  140.93    7.05
  -2   8   0  143.14    6.93
  -2   8   0  135.90    6.93
  -2   8   0  134.31    6.80
  -2   8   0  138.14    6.93
  -2   8   0  137.04    6.87
  -2   8   0  157.45    6.99
  -2   8   0  133.44    6.87
  -2   8   0  137.40    6.85
  -2   8   0  144.42    7.27
  -2   8   0  135.71    6.80
  -2   8   0  136.09    6.80
   2  -8   0  142.97    6.85
   2  -8   0  143.52    7.17
   2  -8   0  138.26    7.04
   2  -8   0  144.46    6.95
   2  -8   0  148.34    6.94
   2  -8   0  144.22    6.86
   2  -8   0  148.74    6.84
   2  -8   0  144.16    6.82
   2  -8   0  132.35    7.06
   2  -8   0  135.70    6.84
   2  -8   0  136.51    6.86
   2  -8   0  145.11    6.83
   2  -8   0  144.90    6.84
   2  -8   0  133.74    6.85
   2  -8   0  135.87    6.95
  -3   8   0   44.16    2.39
  -3   8   0   47.43    2.47
  -3   8   0   45.59    2.37
  -3   8   0   45.94    2.31
  -3   8   0   46.47    2.32
  -3   8   0   49.21    2.77
  -3   8   0   55.13    2.43
  -3   8   0   46.61    2.57
  -3   8   0   48.44    2.31
  -3   8   0   45.38    2.37
  -3   8   0   46.84    2.44
  -3   8   0   48.53    2.35
  -3   8   0   52.64    2.50
  -3   8   0   44.59    2.32
  -3   8   0   46.83    2.45
  -3   8   0   44.15    2.39
   3  -8   0   47.47    2.47
   3  -8   0   48.07    2.48
   3  -8   0   46.82    2.35
   3  -8   0   47.18    2.45
   3  -8   0   47.74    2.81
   3  -8   0   46.40    2.59
   3  -8   0   45.74    2.37
   3  -8   0   50.09    2.36
   3  -8   0   45.01    2.55
   3  -8   0   49.10    2.38
   3  -8   0   46.58    2.39
   3  -8   0   48.49    2.48
   3  -8   0   48.78    2.37
   3  -8   0   46.44    2.38
  -4   8   0    1.44    0.11
  -4   8   0    1.47    0.33
  -4   8   0    0.96    0.16
  -4   8   0    1.27    0.12
  -4   8   0    1.35    0.40
  -4   8   0    1.58    0.16
  -4   8   0    1.28    0.12
  -4   8   0    1.29    0.25
  -4   8   0    1.28    0.21
  -4   8   0    1.65    0.27
  -4   8   0    1.36    0.20
  -4   8   0    1.65    0.24
  -4   8   0    1.19    0.12
  -4   8   0    1.49    0.18
  -4   8   0    1.70    0.22
  -4   8   0    1.66    0.28
   4  -8   0    1.50    0.20
   4  -8   0    1.75    0.29
   4  -8   0    1.70    0.18
   4  -8   0    1.16    0.28
   4  -8   0    1.42    0.32
   4  -8   0    1.73    0.29
   4  -8   0    1.84    0.22
   4  -8   0    1.55    0.18
   4  -8   0    1.47    0.27
   4  -8   0    1.48    0.24
   4  -8   0    1.33    0.18
   4  -8   0    1.77    0.18
   4  -8   0    1.46    0.18
   4  -8   0    1.58    0.19
   4  -8   0    1.43    0.19
  -5   8   0   79.49    3.98
  -5   8   0   80.31    4.37
  -5   8   0   78.73    4.21
  -5   8   0   76.97    3.95
  -5   8   0   79.41    3.96
  -5   8   0   77.69    3.87
  -5   8   0   79.42    3.87
  -5   8   0   80.56    4.08
  -5   8   0   79.73    4.05
  -5   8   0   83.57    4.04
  -5   8   0   79.73    4.08
  -5   8   0   81.36    4.01
  -5   8   0   83.44    4.04
  -5   8   0   76.57    3.99
   5  -8   0   83.74    3.98
   5  -8   0   81.07    4.19
   5  -8   0   79.99    4.00
   5  -8   0   84.72    4.08
   5  -8   0   78.36    4.09
   5  -8   0   79.21    3.97
   5  -8   0   80.73    3.93
   5  -8   0   82.86    4.09
   5  -8   0   83.14    3.95
   5  -8   0   83.58    4.05
   5  -8   0   84.33    3.97
   5  -8   0   79.98    3.95
   5  -8   0   76.83    3.96
   5  -8   0   81.62    3.96
  -6   8   0   10.87    0.77
  -6   8   0   11.03    0.67
  -6   8   0   11.52    0.75
  -6   8   0   10.64    0.68
  -6   8   0   11.05    0.77
  -6   8   0   10.72    0.70
  -6   8   0   10.85    0.65
  -6   8   0   11.80    0.65
  -6   8   0   11.27    0.71
  -6   8   0   12.87    1.05
   6  -8   0   12.80    0.80
   6  -8   0   12.00    0.67
   6  -8   0   11.64    0.66
   6  -8   0   11.18    0.65
   6  -8   0   11.24    0.87
   6  -8   0   11.65    0.60
   6  -8   0   11.48    0.67
   6  -8   0   11.75    0.74
   6  -8   0   11.29    0.78
   6  -8   0   11.38    0.70
   6  -8   0   10.46    0.64
   6  -8   0   11.11    0.66
   6  -8   0   10.30    0.77
   6  -8   0   11.06    0.63
   6  -8   0   11.28    0.76
  -7   8   0   16.60    0.94
  -7   8   0   16.20    0.91
  -7   8   0   15.37    1.02
  -7   8   0   17.73    1.32
  -7   8   0   16.77    0.96
  -7   8   0   16.09    0.88
  -7   8   0   15.71    0.99
  -7   8   0   15.47    0.91
  -7   8   0   16.16    0.95
   7  -8   0   17.05    1.00
   7  -8   0   18.04    1.05
   7  -8   0   15.82    1.05
   7  -8   0   16.59    0.80
   7  -8   0   16.20    0.88
   7  -8   0   16.33    0.91
   7  -8   0   15.95    0.92
   7  -8   0   15.57    1.12
   7  -8   0   16.16    0.90
   7  -8   0   16.13    0.91
   7  -8   0   15.95    0.89
   7  -8   0   16.35    0.90
   7  -8   0   15.86    1.02
  -8   8   0    1.61    0.27
  -8   8   0    1.72    0.31
  -8   8   0    1.82    0.36
  -8   8   0    1.85    0.67
  -8   8   0    1.98    0.27
  -8   8   0    1.63    0.24
  -8   8   0    1.91    0.52
  -8   8   0    1.65    0.26
   8  -8   0    2.51    0.39
   8  -8   0    1.90    0.27
   8  -8   0    1.76    0.37
   8  -8   0    1.67    0.23
   8  -8   0    1.89    0.31
   8  -8   0    2.06    0.41
   8  -8   0    2.07    0.25
   8  -8   0    1.69    0.34
   8  -8   0    1.81    0.23
   8  -8   0    1.73    0.24
   8  -8   0    1.80    0.23
   8  -8   0    1.64    0.20
   8  -8   0    2.02    0.30
  -9   8   0   40.32    2.52
  -9   8   0   39.99    2.16
  -9   8   0   38.79    1.99
  -9   8   0   38.37    2.10
  -9   8   0   36.26    2.01
   9  -8   0   37.31    1.95
   9  -8   0   40.58    2.01
   9  -8   0   39.68    2.13
   9  -8   0   37.32    2.01
   9  -8   0   37.55    1.98
   9  -8   0   39.17    1.99
   9  -8   0   38.20    1.98
   9  -8   0   40.40    2.29
   9  -8   0   37.97    2.16
   9  -8   0   34.99    2.13
   9  -8   0   37.41    2.05
   9  -8   0   41.40    2.14
 -10   8   0   34.54    2.59
 -10   8   0   28.35    1.70
 -10   8   0   25.73    1.73
 -10   8   0   29.84    1.62
 -10   8   0   29.78    1.58
 -10   8   0   31.19    2.14
  10  -8   0   31.44    1.75
  10  -8   0   29.48    1.58
  10  -8   0   28.80    1.62
  10  -8   0   29.17    1.61
  10  -8   0   30.13    1.60
  10  -8   0   26.51    1.75
  10  -8   0   33.36    1.93
  10  -8   0   30.05    1.56
  10  -8   0   31.58    1.80
  10  -8   0   31.21    1.76
 -11   8   0    1.10    0.22
 -11   8   0    1.77    0.36
 -11   8   0    1.50    0.56
 -11   8   0    0.70    0.31
 -11   8   0    0.92    0.65
 -11   8   0    1.20    0.25
 -11   8   0    1.02    0.43
  11  -8   0    1.53    0.28
  11  -8   0    1.37    0.37
  11  -8   0    1.36    0.22
  11  -8   0    1.48    0.38
  11  -8   0    1.03    0.37
  11  -8   0    1.81    0.45
  11  -8   0    1.17    0.33
  11  -8   0    1.16    0.23
 -12   8   0   61.40    3.37
 -12   8   0   63.83    3.30
 -12   8   0   63.32    4.37
 -12   8   0   64.04    3.12
 -12   8   0   65.97    3.87
 -12   8   0   62.13    3.19
 -12   8   0   62.92    3.51
  12  -8   0   62.72    3.54
  12  -8   0   65.72    3.36
  12  -8   0   61.30    3.13
  12  -8   0   59.72    3.17
  12  -8   0   60.48    3.19
  12  -8   0   57.63    3.36
  12  -8   0   56.92    3.37
 -13   8   0    0.10    0.31
 -13   8   0    0.57    0.24
 -13   8   0    0.85    0.45
 -13   8   0    0.28    0.18
 -13   8   0    0.84    0.56
 -13   8   0   -0.04    0.25
  13  -8   0    0.33    0.19
  13  -8   0    0.21    0.35
  13  -8   0    0.15    0.17
  13  -8   0    1.13    0.38
  13  -8   0    0.24    0.33
  13  -8   0    0.67    0.27
 -14   8   0   26.48    1.78
 -14   8   0   27.23    1.46
 -14   8   0   27.74    1.95
 -14   8   0   26.93    1.69
  14  -8   0   30.08    1.81
  14  -8   0   28.17    1.55
  14  -8   0   26.75    1.60
 -15   8   0   23.85    1.87
 -15   8   0   28.78    1.69
 -15   8   0   22.88    1.69
  15  -8   0   24.40    1.53
  15  -8   0   27.99    1.74
  15  -8   0   25.85    1.48
 -16   8   0   17.32    1.29
 -16   8   0   16.37    1.52
 -16   8   0   13.70    1.28
  16  -8   0   19.25    1.41
  16  -8   0   19.06    1.20
  16  -8   0   17.30    1.11
 -17   8   0   25.91    1.89
 -17   8   0   29.06    1.85
 -17   8   0   28.69    2.17
  17  -8   0   29.69    1.96
  17  -8   0   29.95    1.76
  16   9   0    8.08    0.74
  16   9   0    7.83    0.76
  16   9   0    8.21    1.09
  16   9   0    6.13    0.93
  16   9   0    8.96    0.82
  16   9   0    8.54    1.28
 -16  -9   0    8.13    0.57
 -16  -9   0    9.05    0.63
 -16  -9   0    8.32    0.56
 -16  -9   0    8.32    0.63
 -16  -9   0    8.47    1.15
 -16  -9   0    9.30    0.96
 -16  -9   0    9.85    1.59
 -16  -9   0    8.36    0.56
  15   9   0   11.68    0.89
  15   9   0   11.15    0.87
  15   9   0   13.03    0.98
  15   9   0   12.75    1.31
  15   9   0   11.53    1.46
  15   9   0   11.09    1.24
 -15  -9   0   11.01    1.34
 -15  -9   0   12.30    0.82
 -15  -9   0   12.52    1.07
 -15  -9   0   11.65    0.73
 -15  -9   0   11.87    0.76
 -15  -9   0   13.27    0.82
 -15  -9   0   13.84    1.74
 -15  -9   0   11.51    0.75
  14   9   0    6.07    0.86
  14   9   0    5.53    0.65
  14   9   0    5.47    0.99
  14   9   0    5.95    0.60
  14   9   0    6.01    0.84
  14   9   0    5.29    0.57
  14   9   0    5.01    0.63
 -14  -9   0    5.62    0.51
 -14  -9   0    4.79    0.87
 -14  -9   0    6.36    0.54
 -14  -9   0    5.31    0.78
 -14  -9   0    6.49    0.50
 -14  -9   0    5.41    0.45
 -14  -9   0    5.90    0.49
 -14  -9   0    7.04    1.30
  13   9   0   19.41    1.24
  13   9   0   19.12    1.46
  13   9   0   18.89    1.63
  13   9   0   18.68    1.20
  13   9   0   18.89    1.20
  13   9   0   19.34    1.28
  13   9   0   16.83    1.39
 -13  -9   0   19.42    1.14
 -13  -9   0   20.20    1.15
 -13  -9   0   19.04    1.55
 -13  -9   0   20.87    1.16
 -13  -9   0   20.04    1.41
 -13  -9   0   22.89    2.13
 -13  -9   0   19.54    1.10
 -13  -9   0   21.76    1.20
  12   9   0    0.69    0.35
  12   9   0    0.87    0.31
  12   9   0    0.84    0.51
  12   9   0    0.19    0.24
  12   9   0    0.03    0.24
  12   9   0    0.81    0.39
  12   9   0    0.35    0.25
 -12  -9   0    0.85    0.24
 -12  -9   0    0.30    0.34
 -12  -9   0    0.44    0.21
 -12  -9   0    0.50    0.19
 -12  -9   0    0.73    0.22
 -12  -9   0    0.46    0.20
 -12  -9   0    0.91    0.44
 -12  -9   0    0.20    0.36
 -12  -9   0    0.89    0.64
  11   9   0   16.26    1.39
  11   9   0   17.65    1.11
  11   9   0   17.12    1.14
  11   9   0   17.85    1.08
  11   9   0   17.56    1.31
  11   9   0   18.14    1.29
  11   9   0   17.75    1.09
  11   9   0   17.96    1.06
 -11  -9   0   18.94    1.43
 -11  -9   0   19.40    1.85
 -11  -9   0   16.64    1.04
 -11  -9   0   19.59    1.10
 -11  -9   0   18.64    1.08
 -11  -9   0   18.23    1.08
 -11  -9   0   17.92    1.02
 -11  -9   0   16.42    1.27
 -11  -9   0   20.22    1.30
  10   9   0    3.75    0.61
  10   9   0    2.83    0.65
  10   9   0    4.16    0.44
  10   9   0    4.08    0.49
  10   9   0    3.37    0.38
  10   9   0    3.99    0.42
  10   9   0    3.50    0.58
  10   9   0    2.99    0.41
 -10  -9   0    4.49    0.59
 -10  -9   0    4.45    0.70
 -10  -9   0    4.01    0.39
 -10  -9   0    4.33    0.44
 -10  -9   0    3.90    0.42
 -10  -9   0    4.55    1.03
 -10  -9   0    3.82    0.43
 -10  -9   0    3.45    0.35
 -10  -9   0    3.18    0.58
 -10  -9   0    4.70    0.65
   9   9   0   26.78    1.68
   9   9   0   27.21    1.85
   9   9   0   28.96    1.58
   9   9   0   28.47    1.77
   9   9   0   29.88    1.69
   9   9   0   24.17    1.84
   9   9   0   31.47    1.58
   9   9   0   29.33    1.55
   9   9   0   27.74    1.52
   9   9   0   27.02    1.79
   9   9   0   25.13    1.92
   9   9   0   26.57    1.72
   9   9   0   28.88    1.61
  -9  -9   0   30.05    1.63
  -9  -9   0   28.27    1.51
  -9  -9   0   29.62    1.65
  -9  -9   0   26.18    1.63
  -9  -9   0   27.47    1.91
  -9  -9   0   32.29    2.42
  -9  -9   0   28.99    1.79
  -9  -9   0   28.76    1.57
  -9  -9   0   29.17    1.58
  -9  -9   0   29.40    1.72
  -9  -9   0   30.83    1.58
  -9  -9   0   26.98    1.80
  -9  -9   0   27.93    1.57
  -9  -9   0   27.09    1.76
  -9  -9   0   28.40    1.54
   8   9   0   51.71    2.64
   8   9   0   49.99    3.08
   8   9   0   48.56    2.81
   8   9   0   50.77    3.71
   8   9   0   52.09    2.66
   8   9   0   55.34    2.69
   8   9   0   47.86    2.96
   8   9   0   47.31    3.03
   8   9   0   49.60    2.70
   8   9   0   55.54    2.92
   8   9   0   51.40    2.65
   8   9   0   53.91    2.98
   8   9   0   50.82    2.84
   8   9   0   53.28    2.70
   8   9   0   42.93    2.74
  -8  -9   0   50.83    3.60
  -8  -9   0   54.30    2.69
  -8  -9   0   56.31    2.76
  -8  -9   0   53.92    2.70
  -8  -9   0   56.43    3.56
  -8  -9   0   48.55    3.02
  -8  -9   0   54.29    2.71
  -8  -9   0   50.72    3.30
  -8  -9   0   53.82    2.83
  -8  -9   0   53.81    2.63
  -8  -9   0   53.17    2.65
  -8  -9   0   49.60    2.88
  -8  -9   0   53.13    2.95
  -8  -9   0   48.54    2.68
  -8  -9   0   52.58    2.69
  -8  -9   0   56.20    2.92
   7   9   0   21.63    2.07
   7   9   0   21.04    1.55
   7   9   0   21.69    1.21
   7   9   0   21.26    1.45
   7   9   0   22.65    1.42
   7   9   0   21.78    1.23
   7   9   0   23.04    1.40
   7   9   0   22.27    1.23
   7   9   0   21.54    1.20
   7   9   0   20.82    1.24
   7   9   0   23.46    1.61
   7   9   0   21.68    1.18
   7   9   0   20.33    1.34
   7   9   0   20.95    1.49
  -7  -9   0   22.54    1.41
  -7  -9   0   22.92    1.23
  -7  -9   0   22.77    1.29
  -7  -9   0   21.85    1.93
  -7  -9   0   20.27    1.17
  -7  -9   0   23.13    2.02
  -7  -9   0   20.12    1.41
  -7  -9   0   22.67    1.24
  -7  -9   0   22.74    1.35
  -7  -9   0   22.20    1.47
  -7  -9   0   22.98    1.25
  -7  -9   0   22.71    1.76
  -7  -9   0   20.59    1.19
  -7  -9   0   21.32    1.24
  -7  -9   0   20.60    1.53
  -7  -9   0   21.75    1.25
   6   9   0   43.68    2.53
   6   9   0   49.19    2.84
   6   9   0   45.08    2.78
   6   9   0   51.75    2.49
   6   9   0   51.68    2.64
   6   9   0   47.25    2.44
   6   9   0   48.85    2.46
   6   9   0   48.29    2.47
   6   9   0   46.30    2.68
   6   9   0   44.55    2.57
   6   9   0   50.74    2.66
   6   9   0   48.84    3.38
   6   9   0   47.59    2.42
   6   9   0   46.82    2.71
  -6  -9   0   46.26    2.42
  -6  -9   0   49.88    2.47
  -6  -9   0   49.30    2.48
  -6  -9   0   48.15    2.48
  -6  -9   0   50.40    2.71
  -6  -9   0   43.42    2.64
  -6  -9   0   45.62    2.95
  -6  -9   0   45.42    2.79
  -6  -9   0   45.96    2.48
  -6  -9   0   50.35    2.66
  -6  -9   0   47.57    3.27
  -6  -9   0   50.69    2.58
  -6  -9   0   49.04    2.48
  -6  -9   0   49.40    2.53
  -6  -9   0   51.82    3.30
  -6  -9   0   48.32    2.44
   5   9   0    6.05    0.62
   5   9   0    6.39    0.45
   5   9   0    6.49    0.74
   5   9   0    6.20    0.52
   5   9   0    5.42    1.08
   5   9   0    7.30    0.49
   5   9   0    7.26    0.61
   5   9   0    6.27    0.46
   5   9   0    6.72    0.80
   5   9   0    5.35    0.54
   5   9   0    6.21    0.64
   5   9   0    6.92    0.50
   5   9   0    6.10    0.43
  -5  -9   0    8.00    1.17
  -5  -9   0    7.09    0.85
  -5  -9   0    6.51    0.60
  -5  -9   0    5.92    0.68
  -5  -9   0    6.42    0.48
  -5  -9   0    6.66    0.48
  -5  -9   0    6.98    0.93
  -5  -9   0    6.93    0.52
  -5  -9   0    6.02    0.97
  -5  -9   0    6.08    0.43
  -5  -9   0    6.14    0.49
  -5  -9   0    6.10    0.49
  -5  -9   0    7.36    0.57
  -5  -9   0    6.81    0.47
  -5  -9   0    7.73    0.77
  -5  -9   0    6.45    0.44
   4   9   0   32.67    1.64
   4   9   0   32.72    1.54
   4   9   0   30.48    2.35
   4   9   0   33.29    1.65
   4   9   0   29.06    1.65
   4   9   0   29.44    1.80
   4   9   0   28.92    1.72
   4   9   0   28.73    1.81
   4   9   0   30.18    1.61
   4   9   0   31.73    1.78
   4   9   0   31.67    1.94
   4   9   0   29.02    1.69
   4   9   0   32.75    1.94
   4   9   0   31.38    1.59
   4   9   0   31.54    1.77
  -4  -9   0   31.55    1.83
  -4  -9   0   29.88    2.01
  -4  -9   0   29.56    1.94
  -4  -9   0   32.98    1.80
  -4  -9   0   28.90    2.19
  -4  -9   0   32.34    1.65
  -4  -9   0   32.45    1.72
  -4  -9   0   31.89    1.62
  -4  -9   0   30.57    1.60
  -4  -9   0   32.28    1.66
  -4  -9   0   28.79    1.65
  -4  -9   0   33.30    1.70
  -4  -9   0   30.23    1.65
  -4  -9   0   32.54    1.66
   3   9   0   18.16    1.20
   3   9   0   17.42    1.09
   3   9   0   16.05    1.02
   3   9   0   18.91    1.29
   3   9   0   19.87    1.03
   3   9   0   17.95    0.99
   3   9   0   18.46    1.01
   3   9   0   18.76    0.98
   3   9   0   18.33    1.01
   3   9   0   19.72    1.67
   3   9   0   17.76    1.26
   3   9   0   20.30    1.15
   3   9   0   18.39    0.95
   3   9   0   17.48    1.06
   3   9   0   19.15    1.18
  -3  -9   0   19.82    1.07
  -3  -9   0   17.95    1.19
  -3  -9   0   17.27    1.29
  -3  -9   0   18.48    1.03
  -3  -9   0   19.55    1.54
  -3  -9   0   18.01    1.00
  -3  -9   0   18.34    1.04
  -3  -9   0   17.94    0.99
  -3  -9   0   19.70    1.10
  -3  -9   0   18.63    1.02
  -3  -9   0   17.86    1.04
  -3  -9   0   18.87    1.03
  -3  -9   0   19.07    1.16
  -3  -9   0   17.98    1.34
   2   9   0   24.38    1.48
   2   9   0   25.00    1.57
   2   9   0   25.77    1.30
   2   9   0   26.85    1.45
   2   9   0   24.86    1.93
   2   9   0   27.19    1.35
   2   9   0   25.63    1.46
   2   9   0   24.02    1.32
   2   9   0   25.37    1.34
   2   9   0   26.47    1.34
   2   9   0   24.55    1.51
   2   9   0   24.83    1.42
   2   9   0   24.01    1.36
   2   9   0   26.35    1.61
   2   9   0   22.90    1.38
  -2  -9   0   27.00    1.38
  -2  -9   0   29.54    1.44
  -2  -9   0   26.83    1.33
  -2  -9   0   25.92    1.36
  -2  -9   0   24.34    1.64
  -2  -9   0   25.19    1.33
  -2  -9   0   24.89    1.38
  -2  -9   0   26.61    1.40
  -2  -9   0   23.28    1.50
  -2  -9   0   25.47    1.38
  -2  -9   0   24.60    1.63
  -2  -9   0   25.55    1.35
  -2  -9   0   27.87    1.86
   1   9   0   78.89    3.91
   1   9   0   75.23    3.97
   1   9   0   81.61    4.17
   1   9   0   77.23    3.92
   1   9   0   73.81    3.91
   1   9   0   77.57    4.07
   1   9   0   84.80    3.91
   1   9   0   78.39    4.02
   1   9   0   84.51    4.06
   1   9   0   76.10    4.09
   1   9   0   80.33    3.91
   1   9   0   76.00    3.95
   1   9   0   83.13    4.22
   1   9   0   73.50    3.99
   1   9   0   83.88    4.58
   1   9   0   75.98    3.89
  -1  -9   0   78.64    3.97
  -1  -9   0   84.34    4.27
  -1  -9   0   83.51    4.00
  -1  -9   0   80.49    4.24
  -1  -9   0   80.19    3.95
  -1  -9   0   88.73    4.46
  -1  -9   0   79.64    3.93
  -1  -9   0   81.15    3.96
  -1  -9   0   80.97    3.98
  -1  -9   0   78.70    3.93
  -1  -9   0   79.94    4.10
  -1  -9   0   77.64    3.98
  -1  -9   0   80.88    4.07
  -1  -9   0   85.53    3.96
   0   9   0    0.08    0.11
   0   9   0    0.00    0.29
   0   9   0    0.03    0.09
   0   9   0    0.05    0.14
   0   9   0    0.40    0.20
   0   9   0    0.31    0.10
   0   9   0    0.10    0.13
   0   9   0    0.18    0.09
   0   9   0    0.21    0.21
   0   9   0    0.18    0.09
   0   9   0    0.00    0.08
   0   9   0    0.03    0.09
   0   9   0    0.08    0.06
   0   9   0    0.03    0.08
   0   9   0   -0.07    0.15
   0   9   0    0.15    0.14
   0   9   0   -0.02    0.16
   0  -9   0    0.20    0.14
   0  -9   0   -0.03    0.18
   0  -9   0    0.01    0.09
   0  -9   0    0.16    0.23
   0  -9   0    0.06    0.12
   0  -9   0    0.11    0.13
   0  -9   0    0.22    0.16
   0  -9   0    0.13    0.11
   0  -9   0   -0.11    0.15
   0  -9   0    0.38    0.15
   0  -9   0    0.00    0.09
   0  -9   0    0.12    0.10
   0  -9   0   -0.06    0.22
   0  -9   0    0.20    0.15
   0  -9   0   -0.11    0.18
  -1   9   0   74.62    3.91
  -1   9   0   77.53    4.06
  -1   9   0   76.01    4.07
  -1   9   0   87.65    4.14
  -1   9   0   76.03    3.91
  -1   9   0   84.54    4.22
  -1   9   0   80.48    3.88
  -1   9   0   77.12    3.92
  -1   9   0   82.64    3.91
  -1   9   0   81.66    3.91
  -1   9   0   76.84    3.95
  -1   9   0   75.03    4.00
  -1   9   0   81.69    3.91
  -1   9   0   75.34    3.97
  -1   9   0   83.72    4.49
  -1   9   0   81.57    4.06
  -1   9   0   74.89    4.01
   1  -9   0   82.12    3.99
   1  -9   0   83.04    4.07
   1  -9   0   82.94    4.00
   1  -9   0   87.56    4.38
   1  -9   0   82.33    4.00
   1  -9   0   82.97    3.97
   1  -9   0   83.77    4.22
   1  -9   0   78.67    4.10
   1  -9   0   83.90    3.97
   1  -9   0   78.09    4.07
   1  -9   0   75.23    4.22
   1  -9   0   78.24    3.97
   1  -9   0   83.92    3.99
   1  -9   0   80.27    3.96
   1  -9   0   82.97    3.95
  -2   9   0   28.79    1.52
  -2   9   0   27.95    1.45
  -2   9   0   26.85    1.51
  -2   9   0   28.01    1.35
  -2   9   0   27.13    1.35
  -2   9   0   25.50    1.35
  -2   9   0   24.79    1.41
  -2   9   0   25.30    1.35
  -2   9   0   26.55    1.49
  -2   9   0   26.42    1.84
  -2   9   0   27.44    1.63
  -2   9   0   25.29    1.38
  -2   9   0   27.21    1.45
  -2   9   0   29.61    1.56
   2  -9   0   24.28    1.64
   2  -9   0   26.11    1.49
   2  -9   0   27.37    1.38
   2  -9   0   27.93    1.41
   2  -9   0   28.20    1.43
   2  -9   0   27.18    1.43
   2  -9   0   28.13    1.53
   2  -9   0   26.21    1.40
   2  -9   0   27.87    1.40
   2  -9   0   25.31    1.60
   2  -9   0   27.89    1.44
   2  -9   0   27.61    1.43
   2  -9   0   26.83    1.54
  -3   9   0   18.35    0.96
  -3   9   0   20.82    1.16
  -3   9   0   18.88    1.24
  -3   9   0   18.25    1.03
  -3   9   0   18.54    0.96
  -3   9   0   19.02    1.06
  -3   9   0   19.41    0.95
  -3   9   0   18.63    0.96
  -3   9   0   18.56    0.95
  -3   9   0   18.91    1.10
  -3   9   0   17.12    1.05
  -3   9   0   19.49    1.44
  -3   9   0   19.87    1.13
  -3   9   0   18.33    1.02
  -3   9   0   18.64    1.00
  -3   9   0   19.31    1.13
   3  -9   0   19.71    1.02
   3  -9   0   19.31    1.16
   3  -9   0   17.47    1.21
   3  -9   0   19.39    1.11
   3  -9   0   19.88    1.03
   3  -9   0   18.58    1.00
   3  -9   0   18.95    1.04
   3  -9   0   19.28    1.04
   3  -9   0   18.90    1.14
   3  -9   0   16.66    1.24
   3  -9   0   20.21    1.05
   3  -9   0   19.39    1.05
   3  -9   0   19.36    1.02
  -4   9   0   32.52    1.74
  -4   9   0   29.58    1.68
  -4   9   0   30.84    1.57
  -4   9   0   29.77    1.72
  -4   9   0   33.73    1.78
  -4   9   0   33.29    1.65
  -4   9   0   31.98    1.75
  -4   9   0   32.61    1.90
  -4   9   0   31.77    1.57
  -4   9   0   32.10    1.77
  -4   9   0   30.23    1.57
  -4   9   0   30.93    2.06
  -4   9   0   31.69    1.65
  -4   9   0   31.40    1.57
  -4   9   0   29.99    1.67
   4  -9   0   31.87    1.78
   4  -9   0   30.38    1.73
   4  -9   0   33.07    1.79
   4  -9   0   33.84    1.65
   4  -9   0   34.83    1.79
   4  -9   0   33.15    1.63
   4  -9   0   32.60    1.67
   4  -9   0   33.70    1.66
   4  -9   0   30.27    1.89
   4  -9   0   33.13    1.67
   4  -9   0   32.81    1.69
   4  -9   0   32.41    1.65
   4  -9   0   33.04    1.64
   4  -9   0   33.59    1.67
  -5   9   0    6.74    0.50
  -5   9   0    7.42    0.49
  -5   9   0    6.85    0.67
  -5   9   0    7.50    0.83
  -5   9   0    6.11    0.46
  -5   9   0    6.39    0.56
  -5   9   0    6.65    0.55
  -5   9   0    6.62    0.54
  -5   9   0    6.88    0.44
  -5   9   0    6.43    0.49
  -5   9   0    6.60    0.44
   5  -9   0    6.09    0.46
   5  -9   0    7.05    0.43
   5  -9   0    6.80    0.45
   5  -9   0    6.61    0.46
   5  -9   0    6.71    0.48
   5  -9   0    7.39    0.59
   5  -9   0    6.48    0.41
   5  -9   0    7.02    0.57
   5  -9   0    6.97    0.53
   5  -9   0    7.38    0.58
   5  -9   0    6.73    0.68
   5  -9   0    6.90    0.46
   5  -9   0    7.37    0.45
   5  -9   0    6.12    0.43
  -6   9   0   49.85    2.56
  -6   9   0   50.11    2.54
  -6   9   0   51.06    2.68
  -6   9   0   52.27    3.03
  -6   9   0   49.24    2.53
  -6   9   0   49.10    2.58
  -6   9   0   50.66    2.66
  -6   9   0   49.59    2.61
  -6   9   0   52.01    2.60
   6  -9   0   53.30    2.60
   6  -9   0   49.99    2.52
   6  -9   0   50.71    2.55
   6  -9   0   49.67    2.55
   6  -9   0   50.50    2.82
   6  -9   0   53.67    2.57
   6  -9   0   51.08    2.69
   6  -9   0   49.76    2.56
   6  -9   0   51.46    2.49
   6  -9   0   48.75    2.55
   6  -9   0   53.62    2.69
   6  -9   0   50.57    2.65
   6  -9   0   49.12    2.54
  -7   9   0   22.19    1.25
  -7   9   0   21.62    1.34
  -7   9   0   23.43    1.28
  -7   9   0   23.39    1.30
  -7   9   0   23.57    1.71
  -7   9   0   21.49    1.23
  -7   9   0   23.62    1.40
  -7   9   0   21.54    1.28
   7  -9   0   23.30    1.38
   7  -9   0   24.73    1.36
   7  -9   0   23.66    1.24
   7  -9   0   22.79    1.15
   7  -9   0   22.70    1.37
   7  -9   0   24.05    1.26
   7  -9   0   23.60    1.22
   7  -9   0   24.48    1.25
   7  -9   0   25.66    1.55
   7  -9   0   23.14    1.26
   7  -9   0   23.58    1.40
   7  -9   0   23.14    1.24
   7  -9   0   22.06    1.26
  -8   9   0   61.34    3.11
  -8   9   0   53.07    2.80
  -8   9   0   55.19    2.88
  -8   9   0   53.77    2.77
  -8   9   0   51.53    2.91
  -8   9   0   55.30    3.29
  -8   9   0   53.83    2.77
   8  -9   0   56.91    2.90
   8  -9   0   53.38    2.75
   8  -9   0   58.24    3.09
   8  -9   0   54.20    2.76
   8  -9   0   57.32    2.95
   8  -9   0   53.76    2.77
   8  -9   0   51.03    2.90
   8  -9   0   56.42    2.79
   8  -9   0   52.61    2.78
   8  -9   0   56.21    2.91
   8  -9   0   55.39    2.77
   8  -9   0   53.96    2.74
  -9   9   0   31.27    1.62
  -9   9   0   30.10    1.79
  -9   9   0   30.68    1.66
  -9   9   0   31.06    1.74
  -9   9   0   29.32    2.12
   9  -9   0   29.50    1.75
   9  -9   0   29.84    1.64
   9  -9   0   27.86    1.77
   9  -9   0   32.16    1.62
   9  -9   0   31.09    1.59
   9  -9   0   29.75    1.67
   9  -9   0   29.83    1.63
   9  -9   0   33.01    1.65
   9  -9   0   28.05    1.77
   9  -9   0   33.09    1.80
   9  -9   0   30.83    1.92
   9  -9   0   30.43    1.61
 -10   9   0    3.93    0.55
 -10   9   0    4.89    0.54
 -10   9   0    3.63    0.36
 -10   9   0    4.83    1.11
 -10   9   0    3.60    0.42
 -10   9   0    3.37    0.75
  10  -9   0    4.32    0.38
  10  -9   0    5.40    0.62
  10  -9   0    4.35    0.54
  10  -9   0    4.15    0.42
  10  -9   0    3.67    0.37
  10  -9   0    3.40    0.38
  10  -9   0    4.44    0.57
  10  -9   0    4.29    0.57
  10  -9   0    4.16    0.43
  10  -9   0    3.62    0.62
  10  -9   0    4.28    0.35
 -11   9   0   19.10    1.39
 -11   9   0   20.04    2.06
 -11   9   0   18.32    1.21
 -11   9   0   19.39    1.66
 -11   9   0   18.38    1.11
 -11   9   0   18.83    1.05
 -11   9   0   18.80    1.29
  11  -9   0   18.61    1.05
  11  -9   0   19.63    1.26
  11  -9   0   20.13    1.32
  11  -9   0   17.74    1.11
  11  -9   0   16.92    1.28
  11  -9   0   19.88    1.09
  11  -9   0   17.86    1.10
  11  -9   0   19.91    1.44
  11  -9   0   18.11    1.08
 -12   9   0    0.53    0.50
 -12   9   0    0.37    0.29
 -12   9   0    0.53    0.65
 -12   9   0    0.02    0.28
 -12   9   0    0.51    0.23
 -12   9   0    0.47    0.40
 -12   9   0    0.60    0.19
  12  -9   0    0.56    0.20
  12  -9   0    0.56    0.21
  12  -9   0    0.41    0.18
  12  -9   0    0.91    0.23
  12  -9   0    0.42    0.32
  12  -9   0    0.76    0.40
  12  -9   0    1.10    0.38
  12  -9   0    0.46    0.23
  12  -9   0    0.37    0.33
 -13   9   0   22.03    1.37
 -13   9   0   20.78    1.90
 -13   9   0   21.19    1.14
 -13   9   0   19.34    1.42
 -13   9   0   19.90    1.56
  13  -9   0   20.67    1.69
  13  -9   0   22.78    1.22
  13  -9   0   17.84    1.42
  13  -9   0   21.70    1.42
  13  -9   0   18.60    1.23
  13  -9   0   20.28    1.25
  13  -9   0   20.91    1.24
 -14   9   0    7.06    0.78
 -14   9   0    6.95    0.85
 -14   9   0    6.53    0.95
 -14   9   0    6.09    0.55
  14  -9   0    7.34    0.87
  14  -9   0    6.77    0.58
  14  -9   0    7.14    0.62
  14  -9   0    6.72    0.63
 -15   9   0   13.86    1.08
 -15   9   0   10.29    1.11
 -15   9   0    9.88    1.29
  15  -9   0   12.34    0.87
  15  -9   0   13.03    1.10
  15  -9   0   13.79    0.95
 -16   9   0    6.63    0.90
 -16   9   0    9.37    0.96
 -16   9   0    6.34    1.07
  16  -9   0    9.79    0.79
  16  -9   0    8.97    1.04
  16  10   0   -0.51    0.32
  16  10   0    0.09    0.45
  16  10   0    0.85    0.63
  16  10   0    0.78    0.34
  16  10   0    1.57    0.41
  16  10   0    0.62    0.47
 -16 -10   0    0.74    0.71
 -16 -10   0    0.79    0.49
 -16 -10   0    0.49    0.20
 -16 -10   0    0.65    0.26
 -16 -10   0    0.35    0.23
 -16 -10   0    0.62    0.52
 -16 -10   0    0.58    0.20
 -16 -10   0    0.81    0.22
  15  10   0    0.36    0.59
  15  10   0    0.19    0.31
  15  10   0    0.72    0.46
  15  10   0    0.97    0.36
  15  10   0    0.07    0.42
  15  10   0    0.37    0.28
 -15 -10   0    0.24    0.18
 -15 -10   0    0.48    0.24
 -15 -10   0    0.89    0.77
 -15 -10   0    0.54    0.23
 -15 -10   0    0.43    0.21
 -15 -10   0    0.44    0.39
 -15 -10   0    0.36    0.19
 -15 -10   0    0.61    0.41
  14  10   0    1.42    0.54
  14  10   0    2.19    0.40
  14  10   0    2.51    0.42
  14  10   0    2.09    0.56
  14  10   0    2.43    0.46
  14  10   0    2.30    0.72
  14  10   0    2.54    0.47
 -14 -10   0    2.60    0.38
 -14 -10   0    1.42    0.49
 -14 -10   0    3.01    1.04
 -14 -10   0    2.15    0.33
 -14 -10   0    2.33    0.34
 -14 -10   0    1.77    0.63
 -14 -10   0    2.30    0.32
 -14 -10   0    2.26    0.30
  13  10   0    9.42    1.06
  13  10   0    9.71    1.27
  13  10   0    9.15    0.79
  13  10   0   10.54    1.11
  13  10   0    7.74    0.73
  13  10   0    9.61    0.75
  13  10   0   11.33    0.85
 -13 -10   0   10.01    0.70
 -13 -10   0   10.75    1.48
 -13 -10   0    9.69    0.69
 -13 -10   0   10.57    1.22
 -13 -10   0    9.54    0.65
 -13 -10   0   10.59    0.74
 -13 -10   0    8.97    1.02
 -13 -10   0    9.32    0.70
  12  10   0    2.02    0.37
  12  10   0    1.62    0.55
  12  10   0    3.21    0.61
  12  10   0    2.93    0.57
  12  10   0    2.35    0.40
  12  10   0    2.77    0.38
  12  10   0    2.88    0.45
 -12 -10   0    2.38    0.33
 -12 -10   0    2.47    0.33
 -12 -10   0    1.99    0.28
 -12 -10   0    2.64    0.37
 -12 -10   0    3.35    0.96
 -12 -10   0    1.87    0.33
 -12 -10   0    2.05    0.50
 -12 -10   0    4.00    0.73
  11  10   0    0.23    0.33
  11  10   0    1.36    0.56
  11  10   0    0.59    0.37
  11  10   0    0.68    0.26
  11  10   0    0.77    0.24
  11  10   0    0.89    0.30
  11  10   0    0.82    0.29
  11  10   0    0.60    0.24
 -11 -10   0    1.05    0.27
 -11 -10   0    0.65    0.19
 -11 -10   0    0.69    0.45
 -11 -10   0    0.57    0.21
 -11 -10   0    0.71    0.43
 -11 -10   0    0.78    0.25
 -11 -10   0    0.85    0.25
 -11 -10   0    1.47    0.69
  10  10   0    1.77    0.27
  10  10   0    1.31    0.28
  10  10   0    1.90    0.31
  10  10   0    0.77    0.41
  10  10   0    1.74    0.44
  10  10   0    1.80    0.47
  10  10   0    1.29    0.31
  10  10   0    1.18    0.32
 -10 -10   0    1.32    0.29
 -10 -10   0    1.38    0.28
 -10 -10   0    1.68    0.27
 -10 -10   0    1.50    0.29
 -10 -10   0    1.27    0.43
 -10 -10   0    0.77    0.45
 -10 -10   0    1.83    0.26
 -10 -10   0    1.97    0.76
 -10 -10   0    1.86    0.43
   9  10   0    0.98    0.27
   9  10   0    1.24    0.28
   9  10   0    0.53    0.42
   9  10   0    1.49    0.24
   9  10   0    0.90    0.25
   9  10   0    1.10    0.36
   9  10   0    1.15    0.26
   9  10   0    1.38    0.36
   9  10   0    0.95    0.48
  -9 -10   0    0.80    0.43
  -9 -10   0    1.46    0.27
  -9 -10   0    1.52    0.36
  -9 -10   0    1.23    0.28
  -9 -10   0    1.28    0.24
  -9 -10   0    0.86    0.33
  -9 -10   0    1.01    0.59
  -9 -10   0    1.16    0.27
  -9 -10   0    0.98    0.40
  -9 -10   0    1.04    0.22
   8  10   0   20.51    1.54
   8  10   0   19.75    1.12
   8  10   0   18.12    1.16
   8  10   0   19.12    1.41
   8  10   0   20.16    1.16
   8  10   0   19.16    1.36
   8  10   0   18.11    1.27
   8  10   0   20.05    1.13
   8  10   0   18.75    1.09
   8  10   0   18.81    1.45
   8  10   0   22.58    1.38
   8  10   0   19.60    1.15
  -8 -10   0   16.14    1.31
  -8 -10   0   21.88    1.23
  -8 -10   0   20.53    1.36
  -8 -10   0   20.53    1.28
  -8 -10   0   20.02    1.42
  -8 -10   0   20.24    1.15
  -8 -10   0   20.81    1.17
  -8 -10   0   18.94    1.16
  -8 -10   0   19.26    1.50
  -8 -10   0   19.39    1.16
  -8 -10   0   19.79    1.12
  -8 -10   0   18.23    1.09
  -8 -10   0   19.65    1.89
  -8 -10   0   19.61    1.17
   7  10   0   16.04    1.42
   7  10   0   18.29    1.25
   7  10   0   18.82    1.15
   7  10   0   20.27    1.14
   7  10   0   18.59    1.41
   7  10   0   18.87    1.12
   7  10   0   19.59    2.03
   7  10   0   19.59    1.50
   7  10   0   20.55    1.34
   7  10   0   19.30    1.11
   7  10   0   18.48    1.36
   7  10   0   17.71    1.20
   7  10   0   20.07    1.08
  -7 -10   0   19.38    1.10
  -7 -10   0   21.74    1.15
  -7 -10   0   16.28    1.42
  -7 -10   0   19.63    1.14
  -7 -10   0   20.94    1.16
  -7 -10   0   17.89    1.62
  -7 -10   0   22.22    1.27
  -7 -10   0   20.07    1.32
  -7 -10   0   19.58    1.19
  -7 -10   0   19.80    1.35
  -7 -10   0   20.24    1.90
  -7 -10   0   19.86    1.09
  -7 -10   0   19.10    1.15
  -7 -10   0   21.56    1.95
  -7 -10   0   18.91    1.34
  -7 -10   0   20.65    1.16
   6  10   0    0.19    0.19
   6  10   0    0.41    0.25
   6  10   0    0.15    0.25
   6  10   0    0.09    0.24
   6  10   0   -0.06    0.19
   6  10   0    0.24    0.15
   6  10   0    0.24    0.19
   6  10   0    0.13    0.20
   6  10   0    0.16    0.14
   6  10   0   -0.04    0.20
   6  10   0    0.22    0.25
   6  10   0   -0.19    0.27
   6  10   0   -0.09    0.50
   6  10   0    0.08    0.15
   6  10   0    0.11    0.18
  -6 -10   0    0.36    0.19
  -6 -10   0    0.20    0.15
  -6 -10   0    0.26    0.16
  -6 -10   0    0.56    0.20
  -6 -10   0    0.50    0.23
  -6 -10   0    0.43    0.33
  -6 -10   0    0.59    0.36
  -6 -10   0    0.19    0.21
  -6 -10   0    0.21    0.14
  -6 -10   0    0.07    0.13
  -6 -10   0    0.04    0.29
  -6 -10   0    0.27    0.18
  -6 -10   0    0.12    0.41
  -6 -10   0    0.29    0.20
  -6 -10   0    0.30    0.45
  -6 -10   0    0.23    0.37
   5  10   0    3.93    0.50
   5  10   0    3.26    0.60
   5  10   0    3.95    0.97
   5  10   0    4.11    0.62
   5  10   0    5.24    0.41
   5  10   0    3.39    0.53
   5  10   0    3.74    0.44
   5  10   0    5.78    0.60
   5  10   0    4.14    0.34
   5  10   0    5.03    0.43
   5  10   0    4.12    0.37
   5  10   0    4.28    0.54
  -5 -10   0    3.54    0.64
  -5 -10   0    4.35    0.37
  -5 -10   0    5.37    1.00
  -5 -10   0    4.47    0.39
  -5 -10   0    3.65    0.73
  -5 -10   0    4.67    0.40
  -5 -10   0    3.51    0.57
  -5 -10   0    3.58    0.94
  -5 -10   0    4.70    0.42
  -5 -10   0    4.43    0.40
  -5 -10   0    3.82    0.42
  -5 -10   0    4.49    0.35
  -5 -10   0    5.01    0.52
  -5 -10   0    4.48    0.43
  -5 -10   0    4.87    0.64
  -5 -10   0    6.13    0.56
   4  10   0    0.41    0.31
   4  10   0    0.86    0.09
   4  10   0    0.97    0.28
   4  10   0    0.71    0.21
   4  10   0    1.02    0.37
   4  10   0    0.89    0.16
   4  10   0    0.70    0.17
   4  10   0    0.81    0.27
   4  10   0    1.27    0.62
   4  10   0    0.62    0.16
   4  10   0    0.78    0.22
   4  10   0    1.10    0.22
   4  10   0    0.64    0.33
   4  10   0    0.75    0.25
  -4 -10   0    0.62    0.16
  -4 -10   0    0.98    0.39
  -4 -10   0    0.72    0.18
  -4 -10   0    1.02    0.18
  -4 -10   0    1.09    0.39
  -4 -10   0    0.54    0.22
  -4 -10   0    0.83    0.19
  -4 -10   0    1.00    0.23
  -4 -10   0    0.59    0.24
  -4 -10   0    0.63    0.31
  -4 -10   0    0.71    0.20
  -4 -10   0    0.85    0.54
  -4 -10   0    0.75    0.21
  -4 -10   0    0.98    0.22
  -4 -10   0    0.42    0.44
   3  10   0    7.30    0.49
   3  10   0    7.86    0.46
   3  10   0    5.81    0.63
   3  10   0    8.46    0.54
   3  10   0    8.43    0.48
   3  10   0    7.62    0.60
   3  10   0    8.05    0.78
   3  10   0    7.47    0.66
   3  10   0    6.61    0.73
   3  10   0    8.72    0.53
   3  10   0    7.08    0.53
   3  10   0    8.45    0.66
   3  10   0    7.40    1.18
   3  10   0    7.01    0.75
   3  10   0    7.53    0.51
   3  10   0    8.05    0.58
  -3 -10   0    7.96    0.51
  -3 -10   0    7.44    0.55
  -3 -10   0    8.28    0.56
  -3 -10   0    9.43    0.62
  -3 -10   0    8.15    0.51
  -3 -10   0    7.98    0.66
  -3 -10   0    5.58    0.79
  -3 -10   0    7.18    0.69
  -3 -10   0    9.25    1.03
  -3 -10   0    7.31    0.52
  -3 -10   0    5.43    1.05
  -3 -10   0    8.60    0.57
  -3 -10   0    7.17    0.81
  -3 -10   0    7.35    0.54
  -3 -10   0    8.84    0.54
   2  10   0   -0.11    0.12
   2  10   0    0.00    0.16
   2  10   0    0.01    0.12
   2  10   0    0.20    0.18
   2  10   0    0.05    0.15
   2  10   0    0.07    0.20
   2  10   0   -0.05    0.22
   2  10   0   -0.12    0.37
   2  10   0   -0.01    0.11
   2  10   0    0.10    0.18
   2  10   0    0.08    0.09
   2  10   0   -0.10    0.10
   2  10   0   -0.08    0.22
   2  10   0    0.09    0.13
   2  10   0    0.09    0.10
  -2 -10   0    0.05    0.11
  -2 -10   0   -0.15    0.10
  -2 -10   0   -0.03    0.21
  -2 -10   0    0.19    0.12
  -2 -10   0    0.42    0.18
  -2 -10   0    0.11    0.15
  -2 -10   0   -0.04    0.34
  -2 -10   0   -0.07    0.29
  -2 -10   0    0.04    0.11
  -2 -10   0    0.01    0.23
  -2 -10   0   -0.02    0.14
  -2 -10   0   -0.01    0.07
  -2 -10   0   -0.34    0.20
  -2 -10   0    0.07    0.10
  -2 -10   0    0.02    0.16
   1  10   0    3.58    0.29
   1  10   0    3.07    0.34
   1  10   0    3.35    0.27
   1  10   0    3.46    0.29
   1  10   0    2.65    0.30
   1  10   0    3.41    0.42
   1  10   0    3.76    0.25
   1  10   0    4.01    0.28
   1  10   0    3.57    0.40
   1  10   0    3.20    0.52
   1  10   0    3.02    0.42
   1  10   0    3.41    0.39
   1  10   0    3.13    0.48
   1  10   0    2.92    0.27
   1  10   0    2.44    0.42
   1  10   0    4.33    0.82
  -1 -10   0    3.19    0.41
  -1 -10   0    3.26    0.34
  -1 -10   0    3.30    0.55
  -1 -10   0    3.37    0.35
  -1 -10   0    3.53    0.28
  -1 -10   0    4.09    0.40
  -1 -10   0    2.81    0.52
  -1 -10   0    3.62    0.31
  -1 -10   0    4.28    0.73
  -1 -10   0    3.61    0.38
  -1 -10   0    2.80    0.31
  -1 -10   0    3.56    0.30
  -1 -10   0    3.88    0.37
  -1 -10   0    2.03    0.74
  -1 -10   0    3.96    0.51
   0  10   0    6.14    0.63
   0  10   0    6.15    0.38
   0  10   0    5.78    0.39
   0  10   0    6.67    0.50
   0  10   0    6.46    0.97
   0  10   0    5.67    0.60
   0  10   0    6.51    0.38
   0  10   0    5.46    0.39
   0  10   0    6.13    0.38
   0  10   0    6.20    0.60
   0  10   0    5.63    0.41
   0  10   0    5.01    0.54
   0  10   0    5.97    0.47
   0  10   0    5.63    0.44
   0  10   0    5.82    0.34
   0  10   0    6.23    0.39
   0  10   0    5.61    0.52
   0 -10   0    7.03    0.48
   0 -10   0    5.27    0.62
   0 -10   0    5.94    0.59
   0 -10   0    6.33    0.43
   0 -10   0    5.49    0.61
   0 -10   0    5.67    0.43
   0 -10   0    5.62    0.72
   0 -10   0    5.78    0.47
   0 -10   0    5.88    0.52
   0 -10   0    5.81    0.82
   0 -10   0    6.28    0.46
   0 -10   0    5.94    0.41
   0 -10   0    6.16    0.49
   0 -10   0    6.68    0.44
  -1  10   0    3.46    0.42
  -1  10   0    3.18    0.43
  -1  10   0    3.43    0.37
  -1  10   0    3.98    0.40
  -1  10   0    3.07    0.32
  -1  10   0    3.07    0.25
  -1  10   0    3.53    0.24
  -1  10   0    3.58    0.24
  -1  10   0    3.20    0.50
  -1  10   0    3.72    0.47
  -1  10   0    3.38    0.20
  -1  10   0    3.10    0.25
  -1  10   0    3.47    0.72
  -1  10   0    3.19    0.25
  -1  10   0    3.95    0.44
  -1  10   0    2.83    0.27
   1 -10   0    3.92    0.39
   1 -10   0    3.83    0.46
   1 -10   0    3.66    0.36
   1 -10   0    2.76    0.37
   1 -10   0    3.71    0.30
   1 -10   0    2.71    0.31
   1 -10   0    3.95    0.34
   1 -10   0    2.55    0.50
   1 -10   0    3.64    0.53
   1 -10   0    3.50    0.36
   1 -10   0    3.25    0.28
   1 -10   0    3.41    0.29
   1 -10   0    3.21    0.46
  -2  10   0    0.00    0.14
  -2  10   0    0.03    0.06
  -2  10   0   -0.08    0.19
  -2  10   0    0.09    0.11
  -2  10   0   -0.10    0.13
  -2  10   0    0.05    0.06
  -2  10   0   -0.09    0.07
  -2  10   0   -0.01    0.19
  -2  10   0    0.21    0.33
  -2  10   0    0.35    0.20
  -2  10   0    0.05    0.08
  -2  10   0    0.02    0.13
  -2  10   0    0.03    0.07
  -2  10   0   -0.13    0.17
   2 -10   0    0.02    0.19
   2 -10   0    0.04    0.15
   2 -10   0    0.01    0.10
   2 -10   0   -0.31    0.20
   2 -10   0    0.19    0.15
   2 -10   0    0.11    0.10
   2 -10   0    0.11    0.11
   2 -10   0    0.32    0.23
   2 -10   0    0.28    0.19
   2 -10   0    0.20    0.15
   2 -10   0    0.06    0.11
   2 -10   0    0.18    0.14
   2 -10   0   -0.02    0.21
  -3  10   0    7.96    0.43
  -3  10   0    8.44    0.54
  -3  10   0    7.12    0.58
  -3  10   0    7.56    0.41
  -3  10   0    8.29    0.64
  -3  10   0    8.34    0.75
  -3  10   0    7.55    0.44
  -3  10   0    8.31    0.52
  -3  10   0    8.42    0.64
  -3  10   0    7.54    0.44
  -3  10   0    7.44    0.56
  -3  10   0    7.24    0.54
  -3  10   0    7.28    0.43
  -3  10   0    8.85    0.66
  -3  10   0    9.02    0.96
   3 -10   0    8.78    0.56
   3 -10   0    6.98    0.74
   3 -10   0    9.00    0.54
   3 -10   0    7.54    0.53
   3 -10   0    7.97    0.51
   3 -10   0    9.03    0.50
   3 -10   0    7.94    0.60
   3 -10   0    8.67    0.68
   3 -10   0    9.14    0.66
   3 -10   0    8.03    0.56
   3 -10   0    8.65    0.55
   3 -10   0    7.70    0.51
  -4  10   0    0.72    0.16
  -4  10   0    0.73    0.07
  -4  10   0    0.71    0.08
  -4  10   0    0.86    0.21
  -4  10   0    0.89    0.08
  -4  10   0    0.99    0.20
  -4  10   0    0.64    0.07
  -4  10   0    0.75    0.29
  -4  10   0    1.11    0.44
  -4  10   0    0.72    0.19
  -4  10   0    0.83    0.24
  -4  10   0    0.68    0.21
  -4  10   0    1.24    0.28
  -4  10   0    0.68    0.15
   4 -10   0    0.80    0.19
   4 -10   0    1.08    0.19
   4 -10   0    0.93    0.20
   4 -10   0    0.89    0.23
   4 -10   0    0.88    0.16
   4 -10   0    0.90    0.20
   4 -10   0    0.84    0.15
   4 -10   0    1.21    0.32
   4 -10   0    1.17    0.18
   4 -10   0    0.77    0.16
   4 -10   0    0.69    0.21
   4 -10   0    0.70    0.31
   4 -10   0    0.73    0.25
  -5  10   0    4.62    0.43
  -5  10   0    4.82    0.35
  -5  10   0    3.50    0.69
  -5  10   0    4.61    0.43
  -5  10   0    4.80    0.64
  -5  10   0    4.29    0.50
  -5  10   0    4.22    0.38
  -5  10   0    3.74    0.40
  -5  10   0    3.86    0.46
  -5  10   0    3.93    0.33
   5 -10   0    4.79    0.39
   5 -10   0    4.66    0.34
   5 -10   0    4.45    0.35
   5 -10   0    4.84    0.54
   5 -10   0    4.59    0.38
   5 -10   0    4.56    0.33
   5 -10   0    4.67    0.40
   5 -10   0    4.47    0.52
   5 -10   0    3.22    0.55
   5 -10   0    4.79    0.39
   5 -10   0    5.30    0.38
   5 -10   0    4.03    0.43
   5 -10   0    4.61    0.35
  -6  10   0    0.28    0.13
  -6  10   0    0.18    0.34
  -6  10   0    0.40    0.16
  -6  10   0    0.48    0.24
  -6  10   0    0.09    0.22
  -6  10   0    0.17    0.15
  -6  10   0    0.16    0.14
  -6  10   0    0.39    0.16
   6 -10   0    0.35    0.13
   6 -10   0    0.24    0.10
   6 -10   0    0.22    0.14
   6 -10   0    0.14    0.15
   6 -10   0    0.48    0.23
   6 -10   0    0.39    0.29
   6 -10   0    0.22    0.12
   6 -10   0    0.31    0.16
   6 -10   0    0.06    0.16
   6 -10   0    0.12    0.15
   6 -10   0    0.21    0.23
   6 -10   0    0.30    0.18
   6 -10   0    0.28    0.12
  -7  10   0   21.06    1.30
  -7  10   0   20.73    1.64
  -7  10   0   21.54    1.19
  -7  10   0   21.19    1.27
  -7  10   0   20.41    1.27
  -7  10   0   21.19    1.16
  -7  10   0   19.75    1.13
   7 -10   0   19.61    1.26
   7 -10   0   19.36    1.24
   7 -10   0   20.64    1.17
   7 -10   0   22.50    1.17
   7 -10   0   20.80    1.14
   7 -10   0   20.95    1.14
   7 -10   0   20.65    1.14
   7 -10   0   20.14    1.06
   7 -10   0   19.13    1.42
   7 -10   0   20.15    1.15
   7 -10   0   22.47    1.31
   7 -10   0   21.94    1.31
   7 -10   0   21.13    1.12
   7 -10   0   22.02    1.21
  -8  10   0   21.15    1.29
  -8  10   0   19.08    1.31
  -8  10   0   20.36    1.21
  -8  10   0   19.81    1.17
  -8  10   0   20.71    1.16
  -8  10   0   20.99    1.68
   8 -10   0   22.42    1.31
   8 -10   0   22.37    1.21
   8 -10   0   24.70    1.54
   8 -10   0   19.96    1.18
   8 -10   0   23.29    1.18
   8 -10   0   20.39    1.34
   8 -10   0   21.02    1.26
   8 -10   0   21.16    1.14
   8 -10   0   17.98    1.28
   8 -10   0   23.99    1.36
   8 -10   0   20.04    1.16
   8 -10   0   22.51    1.20
  -9  10   0    1.49    0.57
  -9  10   0    1.28    0.23
  -9  10   0    1.45    0.36
  -9  10   0    1.59    0.36
  -9  10   0    1.92    0.79
  -9  10   0    1.32    0.26
   9 -10   0    1.18    0.24
   9 -10   0    1.35    0.36
   9 -10   0    1.08    0.33
   9 -10   0    1.49    0.26
   9 -10   0    1.30    0.21
   9 -10   0    1.79    0.26
   9 -10   0    1.20    0.22
   9 -10   0    1.23    0.22
   9 -10   0    1.39    0.42
   9 -10   0    1.61    0.37
   9 -10   0    1.15    0.30
 -10  10   0    1.25    0.38
 -10  10   0    2.14    0.40
 -10  10   0    1.49    0.26
 -10  10   0    2.44    0.86
 -10  10   0    2.27    0.66
 -10  10   0    1.49    0.29
  10 -10   0    1.50    0.24
  10 -10   0    1.97    0.32
  10 -10   0    2.60    0.31
  10 -10   0    1.55    0.27
  10 -10   0    2.48    0.54
  10 -10   0    1.54    0.39
  10 -10   0    2.59    0.45
  10 -10   0    2.40    0.40
  10 -10   0    2.25    0.31
  10 -10   0    1.77    0.42
 -11  10   0    1.21    0.34
 -11  10   0    0.95    0.54
 -11  10   0    0.36    0.30
 -11  10   0    1.59    0.42
 -11  10   0    0.84    0.21
 -11  10   0    1.14    0.26
 -11  10   0    1.64    0.78
  11 -10   0    0.66    0.21
  11 -10   0    0.88    0.36
  11 -10   0    0.93    0.42
  11 -10   0    0.87    0.36
  11 -10   0    1.17    0.25
  11 -10   0    0.80    0.20
  11 -10   0    1.19    0.25
  11 -10   0    1.10    0.38
  11 -10   0    1.13    0.27
 -12  10   0    2.05    0.51
 -12  10   0    1.55    0.42
 -12  10   0    2.44    0.74
 -12  10   0    2.22    0.47
 -12  10   0    2.40    0.37
 -12  10   0    2.16    1.31
 -12  10   0    2.51    0.29
  12 -10   0    3.27    0.55
  12 -10   0    2.08    0.56
  12 -10   0    2.22    0.33
  12 -10   0    2.60    0.34
  12 -10   0    1.93    0.32
  12 -10   0    1.95    0.35
  12 -10   0    1.61    0.44
 -13  10   0   10.65    0.67
 -13  10   0    9.94    1.18
 -13  10   0   10.11    0.93
 -13  10   0   10.73    1.05
  13 -10   0   10.99    0.77
  13 -10   0   12.36    0.84
  13 -10   0   11.72    0.81
  13 -10   0   11.98    0.99
 -14  10   0    2.32    0.54
 -14  10   0    2.87    0.70
 -14  10   0    1.48    0.44
  14 -10   0    3.53    0.48
  14 -10   0    2.75    0.40
  14 -10   0    2.85    0.59
 -15  10   0    0.41    0.39
 -15  10   0    0.12    0.33
 -15  10   0    1.19    0.56
  15 -10   0    0.74    0.46
  15 -10   0    0.80    0.31
 -16  10   0    0.66    0.43
 -16  10   0    0.72    0.58
 -16  10   0    0.81    0.40
  16 -10   0    1.01    0.51
  16 -10   0    1.15    0.37
  15  11   0    8.47    1.26
  15  11   0    9.00    1.13
  15  11   0    7.17    0.76
  15  11   0    8.49    0.88
  15  11   0    9.66    0.77
  15  11   0    8.51    1.10
 -15 -11   0   10.33    1.57
 -15 -11   0    8.87    0.62
 -15 -11   0    8.76    0.64
 -15 -11   0    9.20    0.70
 -15 -11   0    9.20    0.66
 -15 -11   0    8.78    1.02
 -15 -11   0    8.04    0.66
 -15 -11   0    9.52    1.25
  14  11   0   11.78    0.96
  14  11   0   12.77    1.33
  14  11   0   13.63    1.21
  14  11   0   12.40    1.51
  14  11   0   11.98    1.00
  14  11   0   12.29    1.00
  14  11   0   13.59    0.95
 -14 -11   0   14.63    0.93
 -14 -11   0   12.25    1.43
 -14 -11   0   14.46    0.84
 -14 -11   0   13.41    1.17
 -14 -11   0   14.66    0.89
 -14 -11   0   13.53    0.89
 -14 -11   0   14.40    1.81
 -14 -11   0   14.22    0.90
  13  11   0   16.18    1.05
  13  11   0   17.13    1.13
  13  11   0   14.54    1.05
  13  11   0   15.10    1.65
  13  11   0   14.89    1.27
  13  11   0   15.49    1.10
  13  11   0   15.50    1.33
 -13 -11   0   15.43    1.01
 -13 -11   0   16.38    0.96
 -13 -11   0   16.14    1.03
 -13 -11   0   17.24    1.91
 -13 -11   0   16.42    1.33
 -13 -11   0   17.15    1.47
 -13 -11   0   15.27    1.00
 -13 -11   0   17.21    1.01
  12  11   0    8.44    0.72
  12  11   0    7.05    0.93
  12  11   0    9.25    0.68
  12  11   0    8.62    0.98
  12  11   0    7.51    0.67
  12  11   0    6.09    1.03
  12  11   0    6.56    0.68
 -12 -11   0    8.16    0.66
 -12 -11   0    8.19    0.58
 -12 -11   0    8.59    1.34
 -12 -11   0    7.41    0.93
 -12 -11   0    9.68    1.16
 -12 -11   0    7.81    0.65
 -12 -11   0    8.37    0.63
 -12 -11   0    8.09    0.64
  11  11   0   15.43    0.95
  11  11   0   13.26    0.98
  11  11   0   13.57    1.13
  11  11   0   13.66    0.92
  11  11   0   12.61    1.41
  11  11   0   15.36    0.99
  11  11   0   13.16    1.12
 -11 -11   0   15.42    0.95
 -11 -11   0   15.55    0.89
 -11 -11   0   14.19    0.94
 -11 -11   0   14.77    0.96
 -11 -11   0   12.47    1.35
 -11 -11   0   12.79    1.18
 -11 -11   0   14.74    0.91
  10  11   0    1.37    0.31
  10  11   0    2.19    0.48
  10  11   0    2.40    0.33
  10  11   0    1.91    0.36
  10  11   0    1.81    0.60
  10  11   0    1.96    0.37
  10  11   0    1.28    0.42
  10  11   0    2.04    0.33
 -10 -11   0    2.21    0.35
 -10 -11   0    1.89    0.57
 -10 -11   0    1.95    0.36
 -10 -11   0    2.24    0.30
 -10 -11   0    2.05    0.31
 -10 -11   0    1.38    0.46
 -10 -11   0    2.19    0.34
 -10 -11   0    2.51    0.89
   9  11   0    9.08    0.69
   9  11   0   10.32    0.89
   9  11   0   10.22    0.74
   9  11   0    9.28    1.12
   9  11   0    9.93    0.67
   9  11   0    9.98    0.76
  -9 -11   0   10.36    0.69
  -9 -11   0   10.20    0.95
  -9 -11   0   11.28    0.69
  -9 -11   0   10.22    1.43
  -9 -11   0   10.76    0.87
  -9 -11   0    9.55    1.07
  -9 -11   0    9.66    0.73
  -9 -11   0   10.24    0.72
  -9 -11   0   11.21    0.77
   8  11   0   11.53    0.93
   8  11   0    9.97    1.12
   8  11   0   12.21    0.71
   8  11   0   11.14    0.76
   8  11   0   11.42    0.78
   8  11   0   10.10    0.88
   8  11   0   10.50    1.11
   8  11   0   12.12    0.74
  -8 -11   0   10.67    0.78
  -8 -11   0   11.46    0.73
  -8 -11   0    9.66    1.07
  -8 -11   0   10.77    1.43
  -8 -11   0   11.31    0.88
  -8 -11   0   10.62    0.74
  -8 -11   0   10.19    0.99
  -8 -11   0   12.59    1.02
  -8 -11   0    9.63    0.69
  -8 -11   0   10.68    0.77
   7  11   0    2.07    0.38
   7  11   0    2.57    0.38
   7  11   0    3.43    0.40
   7  11   0    2.93    0.49
   7  11   0    3.18    0.36
   7  11   0    3.52    0.57
   7  11   0    3.37    0.38
   7  11   0    3.28    0.34
   7  11   0    2.77    0.54
   7  11   0    2.94    0.49
   7  11   0    3.29    0.63
   7  11   0    2.61    0.59
  -7 -11   0    3.06    0.40
  -7 -11   0    3.92    0.47
  -7 -11   0    3.53    0.41
  -7 -11   0    3.24    0.68
  -7 -11   0    2.96    0.46
  -7 -11   0    2.91    0.33
  -7 -11   0    3.23    0.93
  -7 -11   0    3.33    0.36
  -7 -11   0    3.13    0.58
  -7 -11   0    3.19    0.38
  -7 -11   0    2.84    0.37
  -7 -11   0    4.16    0.63
  -7 -11   0    3.71    0.53
  -7 -11   0    2.87    0.49
   6  11   0   58.20    3.17
   6  11   0   56.35    2.98
   6  11   0   52.04    3.23
   6  11   0   58.90    2.92
   6  11   0   61.29    2.99
   6  11   0   57.47    2.94
   6  11   0   60.63    3.16
   6  11   0   56.12    3.34
   6  11   0   58.22    3.24
   6  11   0   52.73    3.08
   6  11   0   60.69    2.97
   6  11   0   56.10    3.06
   6  11   0   54.37    3.96
  -6 -11   0   57.28    3.00
  -6 -11   0   60.36    3.20
  -6 -11   0   58.78    2.93
  -6 -11   0   62.03    2.99
  -6 -11   0   52.72    3.19
  -6 -11   0   64.29    3.12
  -6 -11   0   51.54    3.85
  -6 -11   0   62.39    3.06
  -6 -11   0   54.76    3.00
  -6 -11   0   59.15    3.25
  -6 -11   0   57.57    3.40
  -6 -11   0   57.04    3.00
  -6 -11   0   64.04    3.94
  -6 -11   0   59.20    2.95
  -6 -11   0   61.55    3.01
   5  11   0   31.94    1.87
   5  11   0   29.78    1.81
   5  11   0   30.79    2.06
   5  11   0   31.00    1.78
   5  11   0   29.60    2.56
   5  11   0   30.92    1.69
   5  11   0   31.86    1.94
   5  11   0   31.46    1.72
   5  11   0   30.12    2.03
   5  11   0   33.57    1.71
   5  11   0   32.15    1.65
   5  11   0   33.83    1.90
   5  11   0   30.98    1.68
   5  11   0   34.07    1.73
   5  11   0   29.52    1.96
  -5 -11   0   30.03    1.67
  -5 -11   0   29.77    1.73
  -5 -11   0   30.24    1.93
  -5 -11   0   32.67    2.45
  -5 -11   0   32.99    1.78
  -5 -11   0   33.79    1.91
  -5 -11   0   32.40    1.71
  -5 -11   0   31.84    2.23
  -5 -11   0   31.24    1.73
  -5 -11   0   35.34    1.74
  -5 -11   0   34.51    1.99
  -5 -11   0   31.76    1.68
  -5 -11   0   35.96    1.84
  -5 -11   0   29.91    1.73
  -5 -11   0   31.96    2.11
   4  11   0    0.86    0.20
   4  11   0    0.82    0.24
   4  11   0    1.60    0.20
   4  11   0    1.37    0.44
   4  11   0    1.46    0.44
   4  11   0    0.93    0.37
   4  11   0    0.98    0.62
   4  11   0    1.80    0.26
   4  11   0    1.24    0.10
   4  11   0    0.96    0.31
   4  11   0    0.95    0.31
   4  11   0    0.93    0.20
   4  11   0    0.78    0.27
   4  11   0    1.14    0.25
  -4 -11   0    1.45    0.26
  -4 -11   0    1.10    0.31
  -4 -11   0    0.92    0.19
  -4 -11   0    1.17    0.44
  -4 -11   0    1.62    0.27
  -4 -11   0    1.29    0.29
  -4 -11   0    1.81    0.30
  -4 -11   0    1.60    0.50
  -4 -11   0    0.98    0.59
  -4 -11   0    1.57    0.26
  -4 -11   0    1.12    0.20
  -4 -11   0    1.21    0.39
  -4 -11   0    0.88    0.53
  -4 -11   0    1.20    0.26
  -4 -11   0    1.29    0.23
   3  11   0    4.18    0.51
   3  11   0    5.11    0.43
   3  11   0    5.46    0.57
   3  11   0    5.28    1.05
   3  11   0    5.56    0.73
   3  11   0    5.82    0.37
   3  11   0    5.48    0.44
   3  11   0    5.02    0.47
   3  11   0    5.38    0.74
   3  11   0    5.19    0.58
   3  11   0    5.02    0.65
   3  11   0    4.89    0.39
   3  11   0    4.99    0.58
   3  11   0    5.82    0.35
   3  11   0    5.32    0.42
   3  11   0    4.81    0.40
  -3 -11   0    5.22    0.95
  -3 -11   0    3.12    0.93
  -3 -11   0    7.80    0.96
  -3 -11   0    5.46    0.47
  -3 -11   0    5.88    0.56
  -3 -11   0    6.16    0.45
  -3 -11   0    4.58    0.44
  -3 -11   0    6.04    0.56
  -3 -11   0    4.53    0.73
  -3 -11   0    5.00    0.46
  -3 -11   0    5.85    0.42
  -3 -11   0    5.56    0.47
  -3 -11   0    6.20    0.71
  -3 -11   0    5.69    0.41
  -3 -11   0    4.92    0.41
   2  11   0    8.26    1.25
   2  11   0    7.84    0.78
   2  11   0    6.34    0.50
   2  11   0    6.46    0.58
   2  11   0    6.51    0.63
   2  11   0    7.40    0.48
   2  11   0    6.90    0.43
   2  11   0    7.29    0.75
   2  11   0    7.58    0.49
   2  11   0    6.48    0.54
   2  11   0    7.84    0.64
   2  11   0    8.33    0.64
   2  11   0    7.34    0.49
   2  11   0    9.11    0.79
   2  11   0    7.07    0.48
   2  11   0    6.95    0.47
  -2 -11   0    6.53    0.85
  -2 -11   0    5.66    1.08
  -2 -11   0    7.21    0.54
  -2 -11   0    7.58    0.50
  -2 -11   0    6.33    0.55
  -2 -11   0    7.28    0.55
  -2 -11   0    7.63    0.57
  -2 -11   0    7.49    0.51
  -2 -11   0    7.03    0.54
  -2 -11   0    7.76    0.50
  -2 -11   0    6.68    0.75
  -2 -11   0    6.72    1.01
  -2 -11   0    7.39    0.82
  -2 -11   0    7.73    0.52
   1  11   0    2.40    0.25
   1  11   0    2.63    0.36
   1  11   0    2.67    0.39
   1  11   0    2.35    0.43
   1  11   0    2.72    0.29
   1  11   0    2.47    0.46
   1  11   0    3.14    0.43
   1  11   0    1.99    0.23
   1  11   0    2.71    0.38
   1  11   0    2.80    0.21
   1  11   0    2.17    0.23
   1  11   0    2.93    0.25
   1  11   0    3.14    0.53
   1  11   0    2.64    0.27
   1  11   0    2.34    0.31
   1  11   0    2.22    0.67
  -1 -11   0    2.57    0.27
  -1 -11   0    2.86    0.35
  -1 -11   0    2.74    0.29
  -1 -11   0    2.84    0.54
  -1 -11   0    1.87    0.41
  -1 -11   0    2.47    0.52
  -1 -11   0    2.27    0.31
  -1 -11   0    1.57    0.70
  -1 -11   0    2.29    0.34
  -1 -11   0    2.60    0.30
  -1 -11   0    2.61    0.39
  -1 -11   0    2.93    0.30
  -1 -11   0    2.84    0.35
   0  11   0    0.24    0.24
   0  11   0    0.51    0.42
   0  11   0    1.03    0.30
   0  11   0    0.59    0.21
   0  11   0    0.58    0.12
   0  11   0    0.32    0.12
   0  11   0    0.95    0.14
   0  11   0    0.63    0.29
   0  11   0    0.74    0.10
   0  11   0    0.94    0.24
   0  11   0    0.43    0.11
   0  11   0    0.98    0.21
   0  11   0    0.68    0.14
   0  11   0    0.51    0.19
   0  11   0    0.43    0.12
   0  11   0    0.42    0.22
   0 -11   0    0.39    0.17
   0 -11   0    0.55    0.17
   0 -11   0    0.60    0.22
   0 -11   0    0.37    0.23
   0 -11   0    0.35    0.14
   0 -11   0    0.08    0.28
   0 -11   0    0.42    0.29
   0 -11   0    0.38    0.20
   0 -11   0    0.22    0.28
   0 -11   0    0.44    0.18
   0 -11   0    0.63    0.16
   0 -11   0    0.64    0.15
   0 -11   0    0.31    0.21
  -1  11   0    1.87    0.20
  -1  11   0    2.19    0.66
  -1  11   0    2.10    0.22
  -1  11   0    1.98    0.27
  -1  11   0    2.39    0.33
  -1  11   0    2.10    0.34
  -1  11   0    2.69    0.48
  -1  11   0    2.66    0.20
  -1  11   0    2.92    0.43
  -1  11   0    1.98    0.38
  -1  11   0    1.85    0.30
  -1  11   0    2.45    0.22
  -1  11   0    1.46    0.32
   1 -11   0    1.90    0.27
   1 -11   0    2.54    0.30
   1 -11   0    2.17    0.24
   1 -11   0    2.30    0.49
   1 -11   0    2.22    0.42
   1 -11   0    2.15    0.37
   1 -11   0    2.44    0.36
   1 -11   0    2.06    0.30
   1 -11   0    2.25    0.34
   1 -11   0    2.31    0.27
   1 -11   0    2.59    0.31
   1 -11   0    2.41    0.28
  -2  11   0    7.35    0.59
  -2  11   0    6.67    0.71
  -2  11   0    6.16    0.65
  -2  11   0    6.69    0.40
  -2  11   0    6.35    0.53
  -2  11   0    8.11    0.65
  -2  11   0    6.97    0.50
  -2  11   0    7.36    0.55
  -2  11   0    6.87    0.60
  -2  11   0    5.55    0.94
  -2  11   0    6.68    0.41
  -2  11   0    7.20    0.42
  -2  11   0    6.88    0.41
   2 -11   0    6.75    0.84
   2 -11   0    7.44    0.70
   2 -11   0    6.83    0.66
   2 -11   0    7.62    0.54
   2 -11   0    7.61    0.52
   2 -11   0    7.53    0.49
   2 -11   0    7.55    0.57
   2 -11   0    6.69    0.48
   2 -11   0    6.79    0.46
   2 -11   0    7.87    0.52
   2 -11   0    6.86    0.58
   2 -11   0    8.04    0.57
  -3  11   0    5.91    0.66
  -3  11   0    4.57    0.54
  -3  11   0    4.89    0.55
  -3  11   0    5.61    0.32
  -3  11   0    6.65    0.98
  -3  11   0    5.02    0.41
  -3  11   0    5.36    0.49
  -3  11   0    5.04    0.45
  -3  11   0    5.26    0.47
  -3  11   0    5.57    0.31
  -3  11   0    5.14    0.32
  -3  11   0    5.16    0.32
  -3  11   0    5.57    0.44
   3 -11   0    5.91    0.52
   3 -11   0    5.94    0.45
   3 -11   0    5.41    0.47
   3 -11   0    5.64    0.49
   3 -11   0    5.27    0.39
   3 -11   0    6.17    0.45
   3 -11   0    5.40    0.73
   3 -11   0    5.70    0.46
   3 -11   0    6.00    0.42
   3 -11   0    6.58    0.63
   3 -11   0    5.22    0.63
  -4  11   0    1.77    0.34
  -4  11   0    1.16    0.21
  -4  11   0    0.82    0.46
  -4  11   0    1.08    0.23
  -4  11   0    1.15    0.25
  -4  11   0    1.40    0.27
  -4  11   0    1.89    0.43
  -4  11   0    1.13    0.20
  -4  11   0    0.86    0.28
   4 -11   0    1.05    0.20
   4 -11   0    0.98    0.24
   4 -11   0    1.69    0.24
   4 -11   0    1.21    0.34
   4 -11   0    0.75    0.24
   4 -11   0    1.61    0.25
   4 -11   0    1.04    0.38
   4 -11   0    1.48    0.25
   4 -11   0    1.36    0.20
   4 -11   0    0.96    0.19
   4 -11   0    1.05    0.25
  -5  11   0   32.57    1.77
  -5  11   0   34.24    1.73
  -5  11   0   33.74    2.07
  -5  11   0   33.24    1.89
  -5  11   0   31.98    1.87
  -5  11   0   34.34    2.32
  -5  11   0   30.37    1.78
  -5  11   0   33.61    1.84
   5 -11   0   35.18    1.73
   5 -11   0   34.20    1.94
   5 -11   0   33.29    1.79
   5 -11   0   35.36    1.87
   5 -11   0   34.14    1.75
   5 -11   0   34.73    1.75
   5 -11   0   28.67    2.03
   5 -11   0   32.86    1.77
   5 -11   0   34.00    1.77
   5 -11   0   32.97    1.78
   5 -11   0   34.92    1.73
   5 -11   0   32.53    1.75
  -6  11   0   60.06    3.10
  -6  11   0   60.97    3.14
  -6  11   0   61.01    3.26
  -6  11   0   60.03    3.17
  -6  11   0   61.58    3.27
  -6  11   0   61.66    3.22
  -6  11   0   62.47    3.72
   6 -11   0   59.95    3.28
   6 -11   0   62.21    3.13
   6 -11   0   63.56    3.13
   6 -11   0   62.39    3.49
   6 -11   0   59.47    3.14
   6 -11   0   66.05    3.16
   6 -11   0   66.33    3.27
   6 -11   0   65.64    3.08
   6 -11   0   62.72    3.31
   6 -11   0   59.53    3.09
   6 -11   0   60.78    3.15
   6 -11   0   63.24    3.13
   6 -11   0   62.67    3.18
  -7  11   0    5.68    1.14
  -7  11   0    3.13    0.47
  -7  11   0    2.95    0.31
  -7  11   0    2.96    0.35
  -7  11   0    3.70    0.78
  -7  11   0    3.24    0.38
  -7  11   0    2.71    0.43
   7 -11   0    3.87    0.52
   7 -11   0    3.32    0.38
   7 -11   0    3.48    0.62
   7 -11   0    2.56    0.32
   7 -11   0    3.71    0.31
   7 -11   0    3.56    0.37
   7 -11   0    3.49    0.45
   7 -11   0    2.96    0.47
   7 -11   0    3.36    0.36
   7 -11   0    2.22    0.41
   7 -11   0    2.91    0.32
  -8  11   0   13.10    0.94
  -8  11   0   18.41    1.76
  -8  11   0   11.18    0.79
  -8  11   0   11.77    0.76
  -8  11   0   12.22    0.89
  -8  11   0   12.49    0.74
  -8  11   0   12.30    1.27
   8 -11   0   12.42    0.76
   8 -11   0   12.86    0.76
   8 -11   0   12.27    1.09
   8 -11   0   12.17    0.77
   8 -11   0   11.74    0.92
   8 -11   0   10.05    0.86
   8 -11   0   13.10    0.89
   8 -11   0   11.43    0.90
   8 -11   0   12.34    0.79
   8 -11   0   10.86    0.76
   8 -11   0   12.09    0.72
  -9  11   0   11.11    0.85
  -9  11   0   10.96    0.89
  -9  11   0    9.64    0.69
  -9  11   0   12.61    1.28
  -9  11   0   10.39    0.74
  -9  11   0   12.90    1.77
   9 -11   0   12.34    0.91
   9 -11   0   10.16    0.88
   9 -11   0   10.55    0.74
   9 -11   0   11.88    1.08
   9 -11   0   10.77    0.73
   9 -11   0   11.35    0.72
   9 -11   0   11.09    0.68
   9 -11   0   11.68    0.85
   9 -11   0   12.04    0.72
   9 -11   0    9.36    0.83
 -10  11   0    2.10    0.34
 -10  11   0    2.54    0.31
 -10  11   0    2.30    0.43
 -10  11   0    2.73    0.75
 -10  11   0    2.25    0.48
 -10  11   0    3.36    1.01
  10 -11   0    2.10    0.30
  10 -11   0    2.11    0.46
  10 -11   0    2.46    0.33
  10 -11   0    2.49    0.38
  10 -11   0    2.09    0.45
  10 -11   0    2.59    0.47
  10 -11   0    2.33    0.29
  10 -11   0    2.15    0.32
  10 -11   0    2.38    0.58
 -11  11   0   14.71    1.16
 -11  11   0   19.71    2.04
 -11  11   0   14.95    1.01
 -11  11   0   16.02    1.12
 -11  11   0   14.61    1.26
 -11  11   0   16.69    1.61
 -11  11   0   15.27    0.91
  11 -11   0   16.47    1.02
  11 -11   0   16.36    1.00
  11 -11   0   17.16    1.19
  11 -11   0   14.88    1.17
  11 -11   0   16.48    1.37
  11 -11   0   16.32    0.98
  11 -11   0   15.61    0.97
 -12  11   0    8.46    0.90
 -12  11   0    8.05    0.55
 -12  11   0    8.68    1.05
 -12  11   0    7.10    1.38
 -12  11   0    8.77    0.87
  12 -11   0    8.01    0.64
  12 -11   0    8.28    0.91
  12 -11   0    7.98    0.68
  12 -11   0    9.55    0.87
  12 -11   0    9.30    0.69
 -13  11   0   18.84    1.27
 -13  11   0   15.80    1.43
 -13  11   0   16.49    1.29
  13 -11   0   16.75    1.39
  13 -11   0   17.63    1.32
  13 -11   0   18.67    1.11
  13 -11   0   17.62    1.15
 -14  11   0   14.17    1.21
 -14  11   0   15.46    1.16
 -14  11   0   14.88    1.38
  14 -11   0   14.80    1.05
  14 -11   0   16.74    1.30
 -15  11   0    9.37    1.24
 -15  11   0   10.37    1.05
 -15  11   0    9.98    1.06
  15 -11   0   11.06    0.88
  15 -11   0   10.31    1.14
  15  12   0    4.59    0.67
  15  12   0    5.92    0.70
  15  12   0    3.80    0.78
  15  12   0    4.49    0.87
  15  12   0    5.55    0.62
  15  12   0    4.43    0.96
  15  12   0    4.38    0.62
 -15 -12   0    5.66    0.58
 -15 -12   0    6.24    1.49
 -15 -12   0    6.09    1.07
 -15 -12   0    4.69    0.45
 -15 -12   0    4.66    0.50
 -15 -12   0    5.49    0.51
 -15 -12   0    5.21    0.85
  14  12   0   10.25    0.82
  14  12   0   12.36    1.26
  14  12   0   10.07    0.84
  14  12   0   10.70    1.23
  14  12   0    9.41    1.38
  14  12   0   10.42    0.91
  14  12   0   11.19    0.90
 -14 -12   0   10.86    0.80
 -14 -12   0   11.84    1.73
 -14 -12   0    9.64    1.28
 -14 -12   0    8.71    1.09
 -14 -12   0   10.88    0.78
 -14 -12   0   11.13    0.73
 -14 -12   0   10.95    0.77
  13  12   0    0.35    0.43
  13  12   0    0.45    0.48
  13  12   0    0.26    0.31
  13  12   0    0.46    0.27
  13  12   0    0.36    0.34
  13  12   0    0.57    0.32
  13  12   0    0.75    0.58
 -13 -12   0    0.75    0.74
 -13 -12   0    0.56    0.44
 -13 -12   0    0.30    0.23
 -13 -12   0    0.36    0.26
 -13 -12   0    0.74    0.26
 -13 -12   0    0.30    0.44
 -13 -12   0    0.58    0.28
 -13 -12   0    0.69    0.24
  12  12   0   22.63    1.39
  12  12   0   19.49    1.77
  12  12   0   20.24    1.32
  12  12   0   21.22    1.58
  12  12   0   23.14    1.33
  12  12   0   21.27    1.36
 -12 -12   0   20.67    1.59
 -12 -12   0   21.61    1.28
 -12 -12   0   23.45    1.34
 -12 -12   0   21.91    1.25
 -12 -12   0   21.55    1.33
 -12 -12   0   23.56    2.28
 -12 -12   0   22.32    1.32
 -12 -12   0   21.50    1.72
  11  12   0    8.47    0.74
  11  12   0    8.17    0.95
  11  12   0    9.13    1.23
  11  12   0    9.34    0.70
  11  12   0    8.83    0.74
 -11 -12   0    8.68    0.71
 -11 -12   0    9.60    0.68
 -11 -12   0    9.59    1.15
 -11 -12   0    7.65    0.98
 -11 -12   0    9.46    1.48
 -11 -12   0    9.07    0.70
 -11 -12   0    8.84    0.72
 -11 -12   0    8.24    0.62
  10  12   0   13.68    1.11
  10  12   0   11.76    1.37
  10  12   0   14.53    0.88
  10  12   0   13.86    0.91
  10  12   0   13.87    0.97
  10  12   0   13.39    0.95
 -10 -12   0   15.99    1.79
 -10 -12   0   12.67    1.16
 -10 -12   0   14.30    0.87
 -10 -12   0   14.09    0.96
 -10 -12   0   13.20    0.92
 -10 -12   0   14.07    0.95
 -10 -12   0   13.76    1.26
 -10 -12   0   14.12    0.89
   9  12   0   12.67    1.38
   9  12   0   14.12    1.09
   9  12   0   14.36    0.90
   9  12   0   15.17    0.87
   9  12   0   12.52    0.93
   9  12   0   15.67    0.95
  -9 -12   0   15.08    0.90
  -9 -12   0   15.23    0.94
  -9 -12   0   11.49    1.13
  -9 -12   0   14.14    0.96
  -9 -12   0   13.19    1.17
  -9 -12   0   14.11    0.95
  -9 -12   0   13.29    0.86
  -9 -12   0   14.70    1.73
   8  12   0   13.92    1.08
   8  12   0   14.45    0.96
   8  12   0   14.76    0.95
   8  12   0   13.32    1.26
   8  12   0   15.85    1.16
   8  12   0   14.28    0.88
   8  12   0   15.18    0.92
  -8 -12   0   14.37    0.90
  -8 -12   0   14.43    0.98
  -8 -12   0   15.73    1.81
  -8 -12   0   16.10    0.96
  -8 -12   0   16.06    0.91
  -8 -12   0   13.62    1.18
  -8 -12   0   14.86    0.98
  -8 -12   0   13.41    1.21
   7  12   0   46.32    2.86
   7  12   0   46.69    2.54
   7  12   0   51.77    2.75
   7  12   0   47.48    2.46
   7  12   0   47.93    2.95
   7  12   0   46.87    2.68
   7  12   0   47.96    2.49
   7  12   0   49.07    2.52
  -7 -12   0   47.35    2.48
  -7 -12   0   50.96    2.51
  -7 -12   0   42.82    2.76
  -7 -12   0   49.39    2.58
  -7 -12   0   46.74    3.53
  -7 -12   0   47.33    2.83
  -7 -12   0   48.86    2.53
  -7 -12   0   48.38    2.56
  -7 -12   0   53.09    2.69
   6  12   0    2.29    0.43
   6  12   0    2.33    0.39
   6  12   0    2.64    0.48
   6  12   0    3.07    0.38
   6  12   0    2.92    0.35
   6  12   0    2.96    0.31
   6  12   0    2.45    0.37
   6  12   0    2.96    0.52
   6  12   0    2.32    0.34
   6  12   0    2.62    0.60
   6  12   0    2.68    0.61
   6  12   0    2.94    0.34
  -6 -12   0    2.94    0.40
  -6 -12   0    2.35    0.62
  -6 -12   0    3.08    0.34
  -6 -12   0    3.03    0.36
  -6 -12   0    2.83    0.33
  -6 -12   0    2.52    0.42
  -6 -12   0    2.38    0.54
  -6 -12   0    2.34    0.37
  -6 -12   0    2.89    0.57
  -6 -12   0    2.53    0.90
  -6 -12   0    3.15    0.52
  -6 -12   0    3.12    0.37
   5  12   0   70.04    3.60
   5  12   0   67.64    3.84
   5  12   0   72.33    3.78
   5  12   0   71.74    3.59
   5  12   0   67.00    3.71
   5  12   0   72.78    4.03
   5  12   0   72.38    3.58
   5  12   0   70.00    4.67
   5  12   0   77.04    3.60
   5  12   0   72.79    3.99
   5  12   0   66.16    3.87
   5  12   0   67.53    3.67
   5  12   0   73.24    3.53
   5  12   0   69.12    3.56
  -5 -12   0   66.77    3.85
  -5 -12   0   74.45    3.67
  -5 -12   0   63.98    4.01
  -5 -12   0   76.49    3.83
  -5 -12   0   70.70    3.57
  -5 -12   0   73.53    3.64
  -5 -12   0   71.85    3.70
  -5 -12   0   74.19    3.61
  -5 -12   0   68.55    3.55
  -5 -12   0   66.23    3.84
  -5 -12   0   69.75    3.63
  -5 -12   0   74.43    3.63
  -5 -12   0   71.56    3.63
   4  12   0   31.61    2.09
   4  12   0   33.47    1.81
   4  12   0   37.12    2.03
   4  12   0   28.64    1.92
   4  12   0   37.26    1.84
   4  12   0   33.45    1.92
   4  12   0   34.72    2.23
   4  12   0   34.78    1.83
   4  12   0   34.56    2.18
   4  12   0   34.92    1.82
   4  12   0   32.73    2.05
   4  12   0   36.06    1.78
   4  12   0   34.81    1.85
   4  12   0   32.37    2.00
   4  12   0   32.92    2.74
  -4 -12   0   39.26    1.98
  -4 -12   0   32.01    2.07
  -4 -12   0   33.35    1.81
  -4 -12   0   35.75    1.88
  -4 -12   0   35.85    1.86
  -4 -12   0   35.27    1.91
  -4 -12   0   30.88    2.22
  -4 -12   0   38.23    2.07
  -4 -12   0   35.89    1.83
  -4 -12   0   37.55    1.88
  -4 -12   0   36.44    2.60
  -4 -12   0   34.23    1.89
  -4 -12   0   34.60    1.88
   3  12   0   18.95    1.36
   3  12   0   20.51    1.29
   3  12   0   20.00    1.11
   3  12   0   19.16    1.27
   3  12   0   20.34    1.10
   3  12   0   20.01    1.05
   3  12   0   18.16    1.18
   3  12   0   19.50    1.46
   3  12   0   19.84    1.04
   3  12   0   20.01    1.09
   3  12   0   17.37    1.20
   3  12   0   18.85    1.90
   3  12   0   19.00    1.31
   3  12   0   19.95    1.10
   3  12   0   19.28    1.42
  -3 -12   0   20.62    1.54
  -3 -12   0   19.91    1.18
  -3 -12   0   20.55    1.22
  -3 -12   0   20.47    1.19
  -3 -12   0   19.46    1.10
  -3 -12   0   19.40    1.55
  -3 -12   0   21.23    1.15
  -3 -12   0   19.62    1.38
  -3 -12   0   20.04    1.30
  -3 -12   0   21.08    1.15
  -3 -12   0   20.17    1.16
  -3 -12   0   20.39    1.17
  -3 -12   0   19.16    1.10
   2  12   0   24.78    1.66
   2  12   0   27.81    1.41
   2  12   0   25.71    1.64
   2  12   0   28.61    1.43
   2  12   0   26.89    1.43
   2  12   0   25.93    1.43
   2  12   0   29.32    1.84
   2  12   0   28.73    1.63
   2  12   0   23.26    2.17
   2  12   0   25.40    1.55
   2  12   0   29.97    1.78
   2  12   0   27.70    1.38
   2  12   0   26.09    1.42
   2  12   0   26.80    1.60
   2  12   0   24.71    1.51
  -2 -12   0   27.03    1.88
  -2 -12   0   25.05    1.68
  -2 -12   0   29.51    1.49
  -2 -12   0   27.62    1.45
  -2 -12   0   26.31    1.52
  -2 -12   0   27.78    1.53
  -2 -12   0   26.80    1.88
  -2 -12   0   26.88    1.52
  -2 -12   0   29.28    1.56
  -2 -12   0   27.90    1.49
  -2 -12   0   26.81    1.45
   1  12   0   13.51    0.73
   1  12   0   14.16    0.78
   1  12   0   15.64    1.10
   1  12   0   16.00    0.77
   1  12   0   14.04    1.51
   1  12   0   14.17    0.79
   1  12   0   15.48    1.00
   1  12   0   13.60    0.78
   1  12   0   14.04    0.77
   1  12   0   13.10    1.02
   1  12   0   12.87    0.92
   1  12   0   12.69    0.89
   1  12   0   13.28    0.97
   1  12   0   13.56    0.87
   1  12   0   15.31    1.16
  -1 -12   0   13.54    1.17
  -1 -12   0   14.45    0.91
  -1 -12   0    9.74    1.49
  -1 -12   0   15.86    0.92
  -1 -12   0   14.61    0.88
  -1 -12   0   14.92    0.82
  -1 -12   0   14.62    0.90
  -1 -12   0   13.97    0.84
  -1 -12   0   10.17    0.90
  -1 -12   0   12.59    1.03
  -1 -12   0   12.11    1.15
  -1 -12   0   14.50    0.83
  -1 -12   0   13.71    0.84
   0  12   0   25.81    1.40
   0  12   0   27.35    1.42
   0  12   0   26.50    1.66
   0  12   0   27.46    1.41
   0  12   0   26.40    1.61
   0  12   0   28.05    1.80
   0  12   0   26.69    1.62
   0  12   0   25.08    1.52
   0  12   0   27.51    1.39
   0  12   0   26.10    1.50
   0  12   0   25.74    2.13
   0  12   0   29.43    1.40
   0  12   0   29.17    1.71
   0  12   0   26.88    1.57
   0 -12   0   24.47    1.66
   0 -12   0   27.72    1.51
   0 -12   0   29.82    1.50
   0 -12   0   28.20    1.48
   0 -12   0   26.10    1.84
   0 -12   0   29.34    1.54
   0 -12   0   28.18    1.55
   0 -12   0   27.02    1.47
   0 -12   0   26.31    1.63
   0 -12   0   27.69    1.45
   0 -12   0   28.99    1.63
   0 -12   0   25.75    1.52
  -1  12   0   13.70    0.78
  -1  12   0   14.28    1.13
  -1  12   0   13.31    1.01
  -1  12   0   12.77    0.90
  -1  12   0   13.16    1.41
  -1  12   0   14.77    0.94
  -1  12   0   14.96    0.99
  -1  12   0   14.75    0.77
  -1  12   0   14.08    0.79
  -1  12   0   14.94    0.88
  -1  12   0   14.22    0.98
  -1  12   0   13.41    0.78
   1 -12   0   14.97    0.91
   1 -12   0   13.99    1.06
   1 -12   0   15.56    0.90
   1 -12   0   14.74    0.84
   1 -12   0   14.89    0.86
   1 -12   0   15.17    0.93
   1 -12   0   14.63    0.87
   1 -12   0   15.21    0.94
   1 -12   0   15.54    1.00
   1 -12   0   12.93    1.18
   1 -12   0   15.33    0.87
   1 -12   0   16.33    1.05
  -2  12   0   25.95    1.52
  -2  12   0   27.32    1.35
  -2  12   0   26.34    1.36
  -2  12   0   26.87    1.34
  -2  12   0   29.47    1.79
  -2  12   0   27.42    1.34
  -2  12   0   26.16    1.36
  -2  12   0   26.19    1.57
  -2  12   0   29.04    1.61
  -2  12   0   29.66    2.16
  -2  12   0   25.97    1.36
  -2  12   0   24.80    1.45
  -2  12   0   24.90    1.49
  -2  12   0   25.12    1.60
   2 -12   0   27.57    1.43
   2 -12   0   28.42    1.52
   2 -12   0   27.92    1.49
   2 -12   0   26.24    1.65
   2 -12   0   26.01    1.45
   2 -12   0   28.83    1.60
   2 -12   0   29.41    1.51
   2 -12   0   27.74    1.46
   2 -12   0   25.18    1.80
   2 -12   0   27.40    1.53
  -3  12   0   19.74    1.01
  -3  12   0   18.76    1.19
  -3  12   0   18.40    1.17
  -3  12   0   19.31    1.42
  -3  12   0   20.91    1.02
  -3  12   0   19.75    1.14
  -3  12   0   20.80    1.75
  -3  12   0   19.65    1.27
  -3  12   0   20.23    1.02
  -3  12   0   19.65    1.29
  -3  12   0   20.11    1.02
  -3  12   0   20.94    1.16
  -3  12   0   21.56    1.26
   3 -12   0   18.67    1.48
   3 -12   0   21.19    1.12
   3 -12   0   21.92    1.16
   3 -12   0   19.72    1.33
   3 -12   0   20.80    1.26
   3 -12   0   20.60    1.21
   3 -12   0   21.94    1.15
   3 -12   0   21.54    1.19
   3 -12   0   22.81    1.19
   3 -12   0   19.95    1.19
  -4  12   0   36.20    2.07
  -4  12   0   38.02    1.91
  -4  12   0   37.95    2.07
  -4  12   0   38.06    2.26
  -4  12   0   36.27    2.02
  -4  12   0   34.59    1.97
  -4  12   0   34.77    1.95
  -4  12   0   38.92    2.59
   4 -12   0   35.72    1.95
   4 -12   0   39.09    1.93
   4 -12   0   36.99    1.93
   4 -12   0   38.56    1.95
   4 -12   0   37.93    2.05
   4 -12   0   35.92    1.89
   4 -12   0   37.55    1.97
   4 -12   0   35.72    1.97
   4 -12   0   33.16    2.26
   4 -12   0   33.89    2.11
   4 -12   0   37.10    1.92
  -5  12   0   71.87    3.85
  -5  12   0   70.59    3.95
  -5  12   0   73.70    4.06
  -5  12   0   70.81    3.75
  -5  12   0   74.42    3.67
  -5  12   0   69.81    3.72
  -5  12   0   77.04    3.86
  -5  12   0   72.49    4.35
   5 -12   0   77.26    3.76
   5 -12   0   80.58    3.86
   5 -12   0   73.72    3.90
   5 -12   0   77.28    3.71
   5 -12   0   76.42    3.71
   5 -12   0   73.82    3.75
   5 -12   0   67.44    4.06
   5 -12   0   71.83    3.72
   5 -12   0   73.10    3.73
   5 -12   0   74.02    3.71
   5 -12   0   76.44    3.68
  -6  12   0    3.32    0.76
  -6  12   0    2.73    0.35
  -6  12   0    2.63    0.29
  -6  12   0    3.07    0.39
  -6  12   0    2.96    0.45
  -6  12   0    2.22    0.42
   6 -12   0    2.79    0.30
   6 -12   0    3.30    0.34
   6 -12   0    2.84    0.49
   6 -12   0    3.06    0.35
   6 -12   0    2.62    0.40
   6 -12   0    2.15    0.33
   6 -12   0    2.59    0.37
   6 -12   0    2.61    0.33
   6 -12   0    2.49    0.57
  -7  12   0   52.06    2.63
  -7  12   0   57.63    3.41
  -7  12   0   51.61    2.67
  -7  12   0   53.60    2.83
  -7  12   0   51.58    2.83
  -7  12   0   47.96    2.70
   7 -12   0   51.47    2.66
   7 -12   0   51.87    3.06
   7 -12   0   55.26    2.70
   7 -12   0   51.44    2.63
   7 -12   0   50.82    2.87
   7 -12   0   51.50    2.70
   7 -12   0   52.32    2.84
   7 -12   0   52.29    2.66
   7 -12   0   54.29    2.81
   7 -12   0   50.07    2.68
   7 -12   0   49.78    2.80
  -8  12   0   16.32    1.10
  -8  12   0   15.16    0.93
  -8  12   0   15.30    0.99
  -8  12   0   15.64    1.11
  -8  12   0   15.18    1.49
  -8  12   0   15.96    0.91
   8 -12   0   15.64    1.14
   8 -12   0   16.43    1.10
   8 -12   0   16.07    1.32
   8 -12   0   15.10    0.96
   8 -12   0   16.16    0.94
   8 -12   0   14.97    1.08
   8 -12   0   17.02    0.91
   8 -12   0   15.01    1.10
   8 -12   0   15.86    0.98
   8 -12   0   14.95    0.94
  -9  12   0   16.00    1.56
  -9  12   0   14.07    0.96
  -9  12   0   14.85    1.10
  -9  12   0   15.80    1.08
  -9  12   0   14.54    0.89
   9 -12   0   14.16    0.88
   9 -12   0   16.07    0.93
   9 -12   0   15.50    1.30
   9 -12   0   16.15    0.92
   9 -12   0   18.71    1.20
   9 -12   0   15.15    1.10
   9 -12   0   14.18    0.94
   9 -12   0   15.34    0.97
   9 -12   0   11.91    1.05
 -10  12   0   13.95    0.95
 -10  12   0   18.71    2.00
 -10  12   0   15.01    1.22
 -10  12   0   14.94    1.07
 -10  12   0   14.39    0.86
 -10  12   0   13.59    1.09
 -10  12   0   14.85    1.53
  10 -12   0   14.20    0.91
  10 -12   0   14.22    1.30
  10 -12   0   14.20    1.13
  10 -12   0   14.82    0.94
  10 -12   0   14.09    0.92
  10 -12   0   15.87    0.92
  10 -12   0   14.95    0.96
  10 -12   0   12.80    1.06
 -11  12   0    9.01    0.76
 -11  12   0    8.73    0.61
 -11  12   0    9.62    1.43
 -11  12   0   10.74    0.91
 -11  12   0    9.32    0.94
 -11  12   0   10.56    1.13
  11 -12   0   10.42    0.76
  11 -12   0    9.06    0.68
  11 -12   0   10.08    0.73
  11 -12   0   11.76    0.99
  11 -12   0    9.64    1.17
  11 -12   0    9.30    0.70
  11 -12   0    9.12    1.10
 -12  12   0   24.92    1.74
 -12  12   0   22.23    1.55
 -12  12   0   22.37    1.50
  12 -12   0   21.11    1.37
  12 -12   0   24.32    1.35
  12 -12   0   21.11    1.40
  12 -12   0   26.08    1.62
 -13  12   0    0.54    0.38
 -13  12   0    0.28    0.44
 -13  12   0    0.40    0.38
  13 -12   0    0.65    0.31
  13 -12   0   -0.20    0.35
  13 -12   0    0.33    0.38
 -14  12   0   11.66    1.15
 -14  12   0   11.50    1.38
 -14  12   0   11.69    1.13
  14 -12   0   13.71    1.20
  14 -12   0   12.05    0.94
 -15  12   0    4.31    0.74
 -15  12   0    5.41    0.99
  15 -12   0    6.90    0.96
  15 -12   0    6.77    0.73
  14  13   0    4.60    0.57
  14  13   0    3.34    0.85
  14  13   0    5.82    0.67
  14  13   0    5.50    0.88
  14  13   0    3.65    0.61
 -14 -13   0    5.24    0.58
 -14 -13   0    4.60    0.47
 -14 -13   0    5.65    1.44
 -14 -13   0    3.11    0.77
 -14 -13   0    5.07    0.53
 -14 -13   0    5.22    0.56
 -14 -13   0    4.69    0.94
  13  13   0   18.97    1.34
  13  13   0   20.01    1.76
  13  13   0   18.39    1.53
  13  13   0   21.43    1.38
  13  13   0   20.28    1.30
 -13 -13   0   22.17    1.27
 -13 -13   0   23.07    2.37
 -13 -13   0   21.87    1.31
 -13 -13   0   17.74    1.68
 -13 -13   0   19.89    1.59
 -13 -13   0   21.93    1.23
 -13 -13   0   22.28    1.31
  12  13   0    0.01    0.42
  12  13   0    0.40    0.28
  12  13   0    0.05    0.28
  12  13   0   -0.45    0.28
  12  13   0    0.17    0.53
 -12 -13   0    0.33    0.49
 -12 -13   0    0.13    0.22
 -12 -13   0    0.12    0.60
 -12 -13   0   -0.07    0.23
 -12 -13   0   -0.36    0.20
 -12 -13   0    0.17    0.21
 -12 -13   0   -0.40    0.36
 -12 -13   0   -0.37    0.23
  11  13   0    6.34    1.07
  11  13   0    6.30    0.68
  11  13   0    6.81    0.68
  11  13   0    5.32    0.58
  11  13   0    6.10    0.84
 -11 -13   0    5.62    0.95
 -11 -13   0    8.77    1.46
 -11 -13   0    6.31    0.55
 -11 -13   0    7.01    0.62
 -11 -13   0    7.11    0.59
 -11 -13   0    6.96    0.65
 -11 -13   0    6.45    0.91
 -11 -13   0    7.20    0.64
  10  13   0   21.42    1.24
  10  13   0   18.88    1.44
  10  13   0   18.05    1.64
  10  13   0   20.21    1.29
  10  13   0   20.32    1.28
 -10 -13   0   18.92    1.56
 -10 -13   0   20.91    1.30
 -10 -13   0   21.61    1.31
 -10 -13   0   20.65    1.21
 -10 -13   0   23.35    2.29
 -10 -13   0   21.00    1.23
 -10 -13   0   18.62    1.52
 -10 -13   0   22.42    1.28
   9  13   0    4.86    0.50
   9  13   0    4.49    0.83
   9  13   0    4.20    0.68
   9  13   0    5.17    0.56
   9  13   0    5.05    0.54
  -9 -13   0    3.94    0.53
  -9 -13   0    3.51    0.74
  -9 -13   0    4.55    0.48
  -9 -13   0    5.00    0.48
  -9 -13   0    5.52    0.53
  -9 -13   0    4.78    0.55
  -9 -13   0    5.54    0.84
  -9 -13   0    5.79    1.37
   8  13   0   43.75    2.79
   8  13   0   44.57    2.44
   8  13   0   44.17    2.39
   8  13   0   42.06    2.58
   8  13   0   49.14    2.90
   8  13   0   46.59    2.36
   8  13   0   45.79    2.42
  -8 -13   0   47.03    3.55
  -8 -13   0   45.62    2.38
  -8 -13   0   47.07    2.48
  -8 -13   0   47.96    2.45
  -8 -13   0   42.58    2.71
  -8 -13   0   46.78    2.40
  -8 -13   0   44.94    2.47
  -8 -13   0   46.51    2.79
   7  13   0    1.20    0.39
   7  13   0    0.69    0.26
   7  13   0    0.64    0.45
   7  13   0    0.57    0.24
   7  13   0    1.29    0.26
   7  13   0    0.79    0.36
   7  13   0    0.84    0.21
  -7 -13   0    0.50    0.21
  -7 -13   0    0.56    0.41
  -7 -13   0    0.54    0.42
  -7 -13   0    0.58    0.25
  -7 -13   0    0.54    0.23
  -7 -13   0    0.79    0.30
  -7 -13   0    0.47    0.60
  -7 -13   0    0.77    0.22
   6  13   0   20.42    1.60
   6  13   0   20.17    1.19
   6  13   0   20.20    1.56
   6  13   0   19.28    1.37
   6  13   0   19.97    1.41
   6  13   0   21.94    1.22
   6  13   0   22.42    1.16
   6  13   0   20.16    1.23
  -6 -13   0   22.39    1.22
  -6 -13   0   21.98    1.29
  -6 -13   0   20.57    1.28
  -6 -13   0   22.81    1.26
  -6 -13   0   18.86    2.11
  -6 -13   0   21.67    1.20
  -6 -13   0   20.73    1.53
  -6 -13   0   20.90    1.51
   5  13   0    0.08    0.35
   5  13   0    0.00    0.17
   5  13   0    0.16    0.20
   5  13   0    0.58    0.19
   5  13   0    0.57    0.20
   5  13   0    0.90    0.36
   5  13   0    0.92    0.34
   5  13   0    0.42    0.22
   5  13   0    0.46    0.15
   5  13   0    0.18    0.33
  -5 -13   0    0.56    0.19
  -5 -13   0    0.57    0.43
  -5 -13   0    0.66    0.39
  -5 -13   0    0.68    0.25
  -5 -13   0    0.17    0.54
  -5 -13   0    0.41    0.20
  -5 -13   0    0.49    0.22
  -5 -13   0    0.33    0.19
  -5 -13   0    0.14    0.35
  -5 -13   0    0.34    0.19
   4  13   0   50.07    2.97
   4  13   0   53.11    3.11
   4  13   0   53.56    2.67
   4  13   0   51.31    2.62
   4  13   0   50.55    2.64
   4  13   0   50.87    2.86
   4  13   0   51.85    2.63
   4  13   0   48.34    3.03
   4  13   0   49.13    2.78
   4  13   0   54.55    2.87
   4  13   0   53.78    2.58
   4  13   0   46.97    2.73
   4  13   0   50.60    3.71
   4  13   0   52.34    3.04
  -4 -13   0   51.52    2.88
  -4 -13   0   52.35    2.69
  -4 -13   0   47.17    2.92
  -4 -13   0   51.86    2.64
  -4 -13   0   52.86    2.70
  -4 -13   0   56.41    2.80
  -4 -13   0   51.54    2.71
  -4 -13   0   49.12    3.13
  -4 -13   0   53.44    2.73
  -4 -13   0   52.10    2.65
   3  13   0    3.19    0.60
   3  13   0    3.21    0.34
   3  13   0    2.73    0.40
   3  13   0    3.68    0.35
   3  13   0    3.65    0.54
   3  13   0    3.49    0.28
   3  13   0    3.50    0.99
   3  13   0    3.30    0.35
   3  13   0    3.41    0.48
   3  13   0    3.51    0.52
   3  13   0    3.12    0.33
   3  13   0    3.37    0.54
   3  13   0    2.92    0.35
   3  13   0    2.79    0.61
   3  13   0    3.80    0.62
  -3 -13   0    3.81    0.41
  -3 -13   0    2.87    0.57
  -3 -13   0    3.80    0.53
  -3 -13   0    2.45    0.63
  -3 -13   0    3.53    0.47
  -3 -13   0    4.35    0.39
  -3 -13   0    3.61    0.44
  -3 -13   0    4.26    0.40
  -3 -13   0    2.50    0.95
  -3 -13   0    3.69    0.46
  -3 -13   0    2.90    0.34
  -3 -13   0    4.28    0.46
   2  13   0   26.97    1.34
   2  13   0   23.04    1.33
   2  13   0   24.97    1.36
   2  13   0   22.34    1.48
   2  13   0   24.63    1.45
   2  13   0   23.71    1.58
   2  13   0   23.55    2.20
   2  13   0   25.95    1.29
   2  13   0   23.40    1.63
   2  13   0   24.34    1.34
   2  13   0   25.46    1.37
   2  13   0   24.87    1.54
   2  13   0   26.65    1.58
   2  13   0   27.19    1.79
  -2 -13   0   25.74    1.58
  -2 -13   0   27.42    1.47
  -2 -13   0   27.14    1.39
  -2 -13   0   25.44    1.48
  -2 -13   0   23.23    1.64
  -2 -13   0   25.40    1.47
  -2 -13   0   27.35    1.47
  -2 -13   0   21.76    1.77
  -2 -13   0   27.65    1.43
  -2 -13   0   26.16    1.39
  -2 -13   0   26.25    1.42
   1  13   0   12.86    0.77
   1  13   0   13.92    0.78
   1  13   0   12.26    1.03
   1  13   0   14.04    0.75
   1  13   0   12.12    0.96
   1  13   0   13.68    1.15
   1  13   0   13.84    0.76
   1  13   0   11.76    0.89
   1  13   0   13.24    0.86
   1  13   0   11.56    0.75
   1  13   0   13.40    1.74
   1  13   0   13.85    0.96
   1  13   0   14.79    0.99
  -1 -13   0   13.68    0.83
  -1 -13   0   12.27    1.05
  -1 -13   0   13.84    0.91
  -1 -13   0   12.57    0.88
  -1 -13   0   13.66    0.81
  -1 -13   0   10.34    1.58
  -1 -13   0   14.81    0.89
  -1 -13   0   14.74    0.85
  -1 -13   0   13.60    0.82
  -1 -13   0   12.44    1.21
  -1 -13   0   13.52    0.89
   0  13   0    0.56    0.34
   0  13   0    1.27    0.33
   0  13   0    0.49    0.27
   0  13   0    0.75    0.25
   0  13   0    0.68    0.25
   0  13   0    1.34    0.29
   0  13   0    1.02    0.16
   0  13   0    0.67    0.11
   0  13   0    0.71    0.15
   0  13   0    0.73    0.21
   0  13   0    1.12    0.16
   0  13   0    0.55    0.51
   0 -13   0    0.63    0.18
   0 -13   0    0.98    0.20
   0 -13   0   -0.17    0.28
   0 -13   0    0.56    0.19
   0 -13   0    0.20    0.19
   0 -13   0    0.37    0.24
   0 -13   0    0.03    0.23
   0 -13   0    0.54    0.20
   0 -13   0    0.18    0.20
   0 -13   0    0.68    0.25
   0 -13   0    0.10    0.33
  -1  13   0   13.74    0.98
  -1  13   0   12.57    0.89
  -1  13   0   14.36    0.94
  -1  13   0   13.43    0.75
  -1  13   0   13.62    1.48
  -1  13   0   13.79    0.74
  -1  13   0   12.79    0.84
  -1  13   0   13.37    0.74
  -1  13   0   13.10    1.13
  -1  13   0   12.22    1.00
  -1  13   0   13.90    0.98
  -1  13   0   12.76    0.73
   1 -13   0   14.47    0.94
   1 -13   0   14.45    0.82
   1 -13   0   14.02    0.85
   1 -13   0   12.78    1.21
   1 -13   0   13.69    0.84
   1 -13   0   14.13    0.90
   1 -13   0   15.32    0.89
   1 -13   0   14.57    0.85
   1 -13   0   13.91    0.97
   1 -13   0   13.52    0.91
   1 -13   0   12.05    1.04
  -2  13   0   25.70    1.28
  -2  13   0   24.48    1.28
  -2  13   0   24.65    1.28
  -2  13   0   24.84    1.52
  -2  13   0   24.09    1.57
  -2  13   0   26.55    1.55
  -2  13   0   24.62    1.47
  -2  13   0   25.84    2.11
  -2  13   0   25.93    1.27
  -2  13   0   24.63    1.45
  -2  13   0   25.89    1.74
   2 -13   0   24.21    1.63
   2 -13   0   27.08    1.38
   2 -13   0   25.87    1.48
   2 -13   0   26.00    1.41
   2 -13   0   26.73    1.47
   2 -13   0   25.29    1.43
   2 -13   0   26.00    1.55
   2 -13   0   22.57    1.76
   2 -13   0   26.85    1.46
   2 -13   0   26.10    1.41
  -3  13   0    3.86    0.64
  -3  13   0    3.97    0.54
  -3  13   0    4.21    0.42
  -3  13   0    3.62    0.85
  -3  13   0    2.95    0.43
  -3  13   0    2.98    0.40
  -3  13   0    3.38    0.44
  -3  13   0    3.50    0.53
   3 -13   0    2.98    0.45
   3 -13   0    3.79    0.36
   3 -13   0    3.14    0.54
   3 -13   0    3.68    0.44
   3 -13   0    3.59    0.40
   3 -13   0    3.40    0.37
   3 -13   0    3.97    0.48
   3 -13   0    2.97    0.66
   3 -13   0    3.31    0.39
   3 -13   0    3.52    0.38
  -4  13   0   57.78    3.23
  -4  13   0   50.82    2.88
  -4  13   0   52.33    2.86
  -4  13   0   55.02    3.56
  -4  13   0   56.37    2.99
  -4  13   0   54.12    3.00
  -4  13   0   59.65    2.82
   4 -13   0   56.42    2.89
   4 -13   0   58.22    2.99
   4 -13   0   56.50    2.81
   4 -13   0   58.85    2.92
   4 -13   0   56.08    2.90
   4 -13   0   56.37    2.86
   4 -13   0   46.69    3.20
   4 -13   0   55.80    2.83
   4 -13   0   52.55    3.05
   4 -13   0   55.60    2.84
  -5  13   0    0.46    0.22
  -5  13   0    0.56    0.18
  -5  13   0    0.23    0.26
  -5  13   0    0.73    0.53
  -5  13   0    0.10    0.20
  -5  13   0    0.76    0.38
  -5  13   0    0.61    0.28
   5 -13   0    0.23    0.22
   5 -13   0    0.47    0.36
   5 -13   0    0.78    0.41
   5 -13   0    0.69    0.17
   5 -13   0    0.57    0.25
   5 -13   0    0.45    0.18
   5 -13   0    0.70    0.26
   5 -13   0    0.59    0.26
   5 -13   0    0.48    0.19
  -6  13   0   21.98    1.42
  -6  13   0   20.85    1.31
  -6  13   0   21.80    1.62
  -6  13   0   20.77    1.27
  -6  13   0   26.31    2.02
  -6  13   0   22.76    1.22
  -6  13   0   23.21    1.44
   6 -13   0   23.30    1.29
   6 -13   0   24.06    1.27
   6 -13   0   23.79    1.42
   6 -13   0   22.28    1.31
   6 -13   0   23.31    1.52
   6 -13   0   19.94    1.63
   6 -13   0   21.63    1.32
   6 -13   0   22.75    1.23
  -7  13   0    0.56    0.52
  -7  13   0    0.53    0.23
  -7  13   0    0.64    0.18
  -7  13   0    0.40    0.69
  -7  13   0    0.72    0.22
  -7  13   0    0.81    0.35
  -7  13   0    0.68    0.36
   7 -13   0    0.77    0.25
   7 -13   0    0.79    0.44
   7 -13   0    0.68    0.36
   7 -13   0    0.96    0.20
   7 -13   0    1.03    0.22
   7 -13   0    1.19    0.28
   7 -13   0    0.96    0.28
  -8  13   0   46.40    2.45
  -8  13   0   49.71    2.54
  -8  13   0   45.53    2.64
  -8  13   0   48.21    2.65
  -8  13   0   52.21    3.29
   8 -13   0   44.02    2.64
   8 -13   0   48.62    2.44
   8 -13   0   48.60    2.47
   8 -13   0   48.45    2.73
   8 -13   0   49.50    2.52
   8 -13   0   42.62    2.87
   8 -13   0   47.60    2.48
   8 -13   0   45.01    2.63
   8 -13   0   47.87    2.52
  -9  13   0    4.71    0.54
  -9  13   0    5.91    0.71
  -9  13   0    5.85    0.72
  -9  13   0    7.09    1.41
  -9  13   0    4.48    0.43
  -9  13   0    5.26    1.06
   9 -13   0    5.61    0.71
   9 -13   0    4.79    0.71
   9 -13   0    5.32    0.88
   9 -13   0    5.26    0.79
   9 -13   0    5.65    0.54
   9 -13   0    5.46    0.56
   9 -13   0    5.73    0.52
   9 -13   0    5.32    0.45
   9 -13   0    5.38    0.52
 -10  13   0   21.62    1.58
 -10  13   0   20.10    1.17
 -10  13   0   20.72    1.44
 -10  13   0   21.82    1.99
 -10  13   0   21.72    1.39
 -10  13   0   24.21    1.48
  10 -13   0   19.95    1.29
  10 -13   0   19.33    1.66
  10 -13   0   22.66    1.30
  10 -13   0   21.66    1.52
  10 -13   0   22.04    1.48
  10 -13   0   22.30    1.27
  10 -13   0   21.87    1.25
 -11  13   0    6.70    0.79
 -11  13   0    6.62    0.82
 -11  13   0    9.18    1.07
  11 -13   0    7.81    0.66
  11 -13   0    7.58    0.63
  11 -13   0    8.86    0.98
  11 -13   0    7.16    0.67
 -12  13   0    0.21    0.35
 -12  13   0   -0.29    0.28
 -12  13   0    0.02    0.41
  12 -13   0    0.05    0.27
  12 -13   0   -0.19    0.40
  12 -13   0    0.13    0.27
 -13  13   0   23.32    1.77
 -13  13   0   23.43    1.54
 -13  13   0   21.97    1.56
  13 -13   0   22.05    1.61
  13 -13   0   21.09    1.40
 -14  13   0    4.01    0.68
 -14  13   0    5.06    0.90
 -14  13   0    4.55    0.75
  14 -13   0    6.29    0.93
  14 -13   0    4.55    0.62
  13  14   0    6.27    1.16
  13  14   0    5.95    0.91
  13  14   0    5.45    0.70
  13  14   0    6.21    0.63
  13  14   0    6.07    0.70
 -13 -14   0    6.75    0.64
 -13 -14   0    5.83    0.92
 -13 -14   0    6.66    1.51
 -13 -14   0    6.22    0.66
 -13 -14   0    4.39    0.94
 -13 -14   0    5.22    0.56
 -13 -14   0    5.55    0.55
  12  14   0    3.92    0.53
  12  14   0    3.40    0.46
  12  14   0    4.31    0.92
  12  14   0    3.58    0.69
  12  14   0    2.96    0.51
 -12 -14   0    3.27    0.47
 -12 -14   0    3.44    0.43
 -12 -14   0    3.59    0.51
 -12 -14   0    3.84    0.82
 -12 -14   0    2.97    0.46
 -12 -14   0    3.50    1.15
 -12 -14   0    2.69    0.39
 -12 -14   0    2.00    0.66
  11  14   0   -0.59    0.27
  11  14   0   -0.17    0.47
  11  14   0    0.15    0.27
  11  14   0   -0.41    0.21
  11  14   0    0.49    0.41
 -11 -14   0   -0.46    0.40
 -11 -14   0   -0.01    0.47
 -11 -14   0   -0.01    0.22
 -11 -14   0   -0.20    0.23
 -11 -14   0    0.09    0.63
 -11 -14   0    0.19    0.24
 -11 -14   0   -0.30    0.24
 -11 -14   0   -0.13    0.20
  10  14   0    0.35    0.24
  10  14   0   -0.19    0.28
  10  14   0    0.79    0.52
  10  14   0    0.34    0.37
  10  14   0    0.85    0.31
 -10 -14   0    0.58    0.71
 -10 -14   0    0.33    0.29
 -10 -14   0    0.94    0.53
 -10 -14   0    0.67    0.26
 -10 -14   0    0.06    0.23
 -10 -14   0    0.65    0.28
 -10 -14   0   -0.31    0.39
 -10 -14   0    0.49    0.23
   9  14   0    1.60    0.37
   9  14   0    2.16    0.34
   9  14   0    2.23    0.38
   9  14   0    2.70    0.54
   9  14   0    2.60    0.70
  -9 -14   0    1.95    0.56
  -9 -14   0    1.76    0.31
  -9 -14   0    2.18    0.59
  -9 -14   0    2.13    0.34
  -9 -14   0    1.82    0.35
  -9 -14   0    2.34    0.42
  -9 -14   0    2.64    1.02
  -9 -14   0    2.19    0.39
   8  14   0   -0.09    0.22
   8  14   0   -0.05    0.32
   8  14   0   -0.46    0.39
   8  14   0    0.13    0.19
   8  14   0   -0.20    0.24
  -8 -14   0    0.01    0.19
  -8 -14   0    0.00    0.20
  -8 -14   0   -0.08    0.59
  -8 -14   0   -0.06    0.22
  -8 -14   0    0.12    0.20
  -8 -14   0    0.02    0.39
  -8 -14   0    0.02    0.24
  -8 -14   0   -0.43    0.31
   7  14   0    6.19    0.58
   7  14   0    5.39    0.71
   7  14   0    6.36    0.58
   7  14   0    7.13    0.54
   7  14   0    7.91    0.87
   7  14   0    5.80    0.92
  -7 -14   0    6.86    0.94
  -7 -14   0    7.88    0.67
  -7 -14   0    6.79    0.55
  -7 -14   0    6.30    0.65
  -7 -14   0    5.32    0.85
  -7 -14   0    6.91    0.55
  -7 -14   0    5.67    1.36
  -7 -14   0    6.64    0.58
   6  14   0   -0.19    0.20
   6  14   0   -0.06    0.27
   6  14   0    0.16    0.39
   6  14   0    0.04    0.20
   6  14   0   -0.03    0.18
   6  14   0   -0.15    0.28
   6  14   0    0.09    0.15
  -6 -14   0   -0.03    0.17
  -6 -14   0    0.04    0.59
  -6 -14   0   -0.43    0.32
  -6 -14   0   -0.29    0.33
  -6 -14   0   -0.24    0.19
  -6 -14   0    0.14    0.24
  -6 -14   0   -0.28    0.15
  -6 -14   0   -0.13    0.17
   5  14   0    2.08    0.25
   5  14   0    1.98    0.55
   5  14   0    1.53    0.40
   5  14   0    1.65    0.31
   5  14   0    1.96    0.31
   5  14   0    2.76    0.51
   5  14   0    1.77    0.28
  -5 -14   0    2.64    0.34
  -5 -14   0    2.80    0.42
  -5 -14   0    1.98    0.54
  -5 -14   0    1.95    0.55
  -5 -14   0    1.48    0.83
  -5 -14   0    2.53    0.38
  -5 -14   0    2.24    0.32
  -5 -14   0    2.65    0.37
   4  14   0    1.52    0.26
   4  14   0    1.31    0.24
   4  14   0    0.99    0.25
   4  14   0    0.68    0.20
   4  14   0    1.53    0.36
   4  14   0    1.40    0.19
   4  14   0    1.55    0.48
   4  14   0    0.96    0.37
  -4 -14   0    1.32    0.32
  -4 -14   0    0.79    0.70
  -4 -14   0    1.23    0.25
  -4 -14   0    1.16    0.27
  -4 -14   0    1.24    0.46
  -4 -14   0    1.17    0.25
  -4 -14   0    1.48    0.32
  -4 -14   0    0.88    0.56
   3  14   0    0.74    0.20
   3  14   0    0.42    0.17
   3  14   0    0.45    0.29
   3  14   0    0.26    0.34
   3  14   0    0.65    0.70
   3  14   0    0.43    0.17
   3  14   0    0.54    0.20
   3  14   0    0.39    0.29
   3  14   0    0.41    0.30
  -3 -14   0    0.52    0.39
  -3 -14   0    0.50    0.23
  -3 -14   0    0.32    0.20
  -3 -14   0    0.52    0.26
  -3 -14   0    0.28    0.19
  -3 -14   0    0.24    0.41
  -3 -14   0    0.93    0.24
  -3 -14   0    0.40    0.18
  -3 -14   0    0.40    0.59
   2  14   0    7.69    0.51
   2  14   0    8.29    0.52
   2  14   0    7.58    0.53
   2  14   0    6.97    0.62
   2  14   0    7.26    0.87
   2  14   0    8.31    0.81
   2  14   0    6.85    0.65
   2  14   0    5.74    0.88
   2  14   0    7.37    0.52
   2  14   0    6.62    0.74
   2  14   0    7.79    1.43
  -2 -14   0    8.01    0.59
  -2 -14   0    8.49    0.57
  -2 -14   0    8.61    0.67
  -2 -14   0    8.61    0.60
  -2 -14   0    9.12    0.69
  -2 -14   0    6.27    0.81
  -2 -14   0    4.93    1.35
  -2 -14   0    4.04    0.84
  -2 -14   0    8.40    0.58
  -2 -14   0    7.98    0.91
   1  14   0    2.95    0.62
   1  14   0    2.44    0.44
   1  14   0    2.40    0.27
   1  14   0    2.23    0.25
   1  14   0    2.53    0.46
   1  14   0    2.22    0.87
   1  14   0    2.78    0.29
   1  14   0    2.35    0.36
   1  14   0    2.75    0.28
   1  14   0    2.98    0.49
   1  14   0    2.90    0.55
   1  14   0    1.71    0.37
  -1 -14   0    3.22    0.43
  -1 -14   0    1.43    0.83
  -1 -14   0    3.09    0.59
  -1 -14   0    2.99    0.36
  -1 -14   0    2.39    0.32
  -1 -14   0    2.72    0.35
  -1 -14   0    3.05    0.37
  -1 -14   0    2.46    0.40
  -1 -14   0    2.30    0.64
   0  14   0    1.42    0.18
   0  14   0    1.59    0.39
   0  14   0    0.72    0.29
   0  14   0    1.30    0.34
   0  14   0    1.18    0.32
   0  14   0    1.32    0.18
   0  14   0    1.01    0.24
   0  14   0    0.79    0.62
   0  14   0    1.42    0.45
   0  14   0    1.61    0.43
   0  14   0    1.55    0.19
   0  14   0    1.32    0.19
   0 -14   0    0.83    0.22
   0 -14   0    1.15    0.32
   0 -14   0    1.26    0.53
   0 -14   0    1.27    0.24
   0 -14   0    0.90    0.32
   0 -14   0    0.98    0.42
   0 -14   0    1.11    0.27
   0 -14   0    1.16    0.31
   0 -14   0    1.73    0.29
   0 -14   0    0.56    0.63
  -1  14   0    2.30    0.23
  -1  14   0    2.40    0.82
  -1  14   0    2.14    0.41
  -1  14   0    2.16    0.40
  -1  14   0    2.69    0.19
  -1  14   0    2.33    0.22
  -1  14   0    2.03    0.48
  -1  14   0    2.53    0.58
  -1  14   0    2.82    0.23
  -1  14   0    2.63    0.40
  -1  14   0    2.03    0.44
   1 -14   0    1.83    0.49
   1 -14   0    2.83    0.44
   1 -14   0    3.42    0.35
   1 -14   0    2.84    0.47
   1 -14   0    2.82    0.35
   1 -14   0    2.05    0.61
   1 -14   0    2.48    0.40
   1 -14   0    2.65    0.36
  -2  14   0   10.27    0.78
  -2  14   0    8.19    0.69
  -2  14   0    8.15    0.64
  -2  14   0    6.91    0.68
  -2  14   0    9.74    0.64
  -2  14   0    7.33    0.41
  -2  14   0    7.42    0.41
  -2  14   0    8.33    0.90
  -2  14   0    7.36    0.41
  -2  14   0    7.52    1.27
  -2  14   0    7.81    0.42
  -2  14   0    7.09    0.80
   2 -14   0    8.34    0.68
   2 -14   0    8.09    0.58
   2 -14   0    9.08    0.72
   2 -14   0    6.96    0.70
   2 -14   0    8.57    0.62
   2 -14   0    7.99    0.90
   2 -14   0    5.86    0.94
   2 -14   0    8.41    0.56
  -3  14   0    0.26    0.30
  -3  14   0    0.15    0.51
  -3  14   0    0.83    0.27
  -3  14   0    0.47    0.29
  -3  14   0    0.21    0.32
  -3  14   0    0.47    0.24
  -3  14   0    0.48    0.20
   3 -14   0    0.44    0.18
   3 -14   0    0.59    0.28
   3 -14   0    0.63    0.31
   3 -14   0   -0.28    0.24
   3 -14   0    0.44    0.18
   3 -14   0    0.36    0.43
   3 -14   0    1.04    0.41
   3 -14   0    0.73    0.25
  -4  14   0    0.63    0.34
  -4  14   0    1.26    0.29
  -4  14   0    1.61    0.38
  -4  14   0    1.06    0.23
  -4  14   0    1.11    0.45
  -4  14   0    1.13    0.63
  -4  14   0    0.86    0.25
   4 -14   0    1.05    0.45
   4 -14   0    1.24    0.34
   4 -14   0    1.30    0.33
   4 -14   0    0.36    0.40
   4 -14   0    1.47    0.31
   4 -14   0    1.29    0.24
   4 -14   0    1.19    0.32
   4 -14   0    1.44    0.24
  -5  14   0    2.71    0.79
  -5  14   0    2.96    0.41
  -5  14   0    2.51    0.48
  -5  14   0    2.19    0.34
  -5  14   0    2.22    0.28
  -5  14   0    2.02    0.54
  -5  14   0    2.42    0.45
   5 -14   0    1.68    0.37
   5 -14   0    2.24    0.31
   5 -14   0    2.68    0.43
   5 -14   0    2.34    0.29
   5 -14   0    1.98    0.51
   5 -14   0    2.62    0.37
   5 -14   0    1.95    0.60
  -6  14   0    0.09    0.28
  -6  14   0    0.00    0.19
  -6  14   0    0.11    0.33
  -6  14   0    0.09    0.47
  -6  14   0   -0.16    0.19
  -6  14   0   -0.08    0.13
  -6  14   0    0.09    0.27
   6 -14   0    0.08    0.25
   6 -14   0   -0.31    0.35
   6 -14   0    0.02    0.14
   6 -14   0   -0.14    0.31
   6 -14   0    0.14    0.15
   6 -14   0   -0.13    0.22
   6 -14   0   -0.10    0.23
  -7  14   0    6.71    1.19
  -7  14   0    6.53    0.75
  -7  14   0    7.41    0.77
  -7  14   0    6.45    0.63
  -7  14   0    6.95    0.54
   7 -14   0    6.17    0.96
   7 -14   0    7.43    0.89
   7 -14   0    5.81    0.49
   7 -14   0    6.83    0.54
   7 -14   0    7.23    0.63
   7 -14   0    7.14    0.64
   7 -14   0    6.67    0.60
  -8  14   0   -0.09    0.28
  -8  14   0   -0.25    0.20
  -8  14   0   -0.21    0.17
  -8  14   0   -0.10    1.03
  -8  14   0   -0.34    0.46
  -8  14   0    0.49    0.36
   8 -14   0   -0.18    0.23
   8 -14   0    0.08    0.17
   8 -14   0    0.11    0.42
   8 -14   0   -0.26    0.21
   8 -14   0   -0.34    0.36
   8 -14   0    0.13    0.26
   8 -14   0   -0.03    0.16
  -9  14   0    2.82    0.51
  -9  14   0    1.98    0.46
  -9  14   0    2.03    0.29
  -9  14   0    2.02    0.92
  -9  14   0    1.59    0.48
   9 -14   0    0.80    0.69
   9 -14   0    2.39    0.39
   9 -14   0    2.12    0.37
   9 -14   0    2.67    0.44
   9 -14   0    2.41    0.56
   9 -14   0    1.72    0.38
 -10  14   0    0.05    0.31
 -10  14   0    0.36    0.39
 -10  14   0    0.44    0.36
  10 -14   0    0.52    0.28
  10 -14   0    0.14    0.41
  10 -14   0    0.38    0.27
  10 -14   0    0.30    0.30
 -11  14   0    0.05    0.31
 -11  14   0   -0.08    0.40
 -11  14   0    0.25    0.38
  11 -14   0    0.04    0.29
  11 -14   0   -0.18    0.35
  11 -14   0    0.27    0.29
 -12  14   0    3.82    0.76
 -12  14   0    4.30    0.66
 -12  14   0    3.47    0.63
  12 -14   0    3.25    0.53
  12 -14   0    3.78    0.71
 -13  14   0    5.86    0.97
 -13  14   0    5.96    0.80
 -13  14   0    5.76    0.81
  13 -14   0    6.26    0.93
  13 -14   0    6.81    0.75
  13  15   0    1.69    0.41
  13  15   0    2.12    0.79
  13  15   0    2.01    0.60
  13  15   0    1.92    0.39
  13  15   0    1.30    0.47
 -13 -15   0    2.51    0.46
 -13 -15   0    2.04    0.40
 -13 -15   0    2.64    1.15
 -13 -15   0    1.23    0.68
 -13 -15   0    1.92    0.64
 -13 -15   0    2.53    0.38
  12  15   0    0.70    0.32
  12  15   0    0.67    0.62
  12  15   0    0.54    0.28
  12  15   0   -1.09    0.28
  12  15   0    0.18    0.44
 -12 -15   0   -0.15    0.46
 -12 -15   0   -0.28    0.56
 -12 -15   0    0.80    0.58
 -12 -15   0    0.12    0.27
 -12 -15   0   -0.08    0.22
 -12 -15   0    0.04    0.30
 -12 -15   0   -0.26    0.20
  11  15   0   18.46    1.14
  11  15   0   15.16    1.77
  11  15   0   16.92    1.38
  11  15   0   18.03    1.20
  11  15   0   15.79    1.18
 -11 -15   0   16.56    1.19
 -11 -15   0   18.24    1.63
 -11 -15   0   14.84    1.44
 -11 -15   0   19.60    1.16
 -11 -15   0   18.67    1.12
 -11 -15   0   20.55    2.30
 -11 -15   0   18.24    1.18
 -11 -15   0   19.09    1.22
  10  15   0    4.16    0.55
  10  15   0    4.11    0.92
  10  15   0    4.04    0.49
  10  15   0    5.78    0.63
  10  15   0    4.46    0.75
 -10 -15   0    5.31    0.58
 -10 -15   0    4.94    0.63
 -10 -15   0    3.65    0.80
 -10 -15   0    5.48    0.55
 -10 -15   0    6.66    1.50
 -10 -15   0    5.06    0.88
 -10 -15   0    4.87    0.52
 -10 -15   0    4.41    0.57
   9  15   0    4.63    0.54
   9  15   0    3.94    0.46
   9  15   0    4.12    0.84
   9  15   0    3.98    0.66
   9  15   0    4.46    0.54
  -9 -15   0    4.42    0.58
  -9 -15   0    4.82    0.50
  -9 -15   0    4.04    0.57
  -9 -15   0    4.87    0.51
  -9 -15   0    4.38    1.27
  -9 -15   0    3.62    0.79
  -9 -15   0    4.47    0.52
  -9 -15   0    2.98    0.73
   8  15   0    3.65    0.64
   8  15   0    4.64    0.52
   8  15   0    3.88    0.48
   8  15   0    3.92    0.82
   8  15   0    4.37    0.46
  -8 -15   0    3.95    1.22
  -8 -15   0    3.12    0.49
  -8 -15   0    3.93    0.46
  -8 -15   0    4.37    0.51
  -8 -15   0    4.68    0.85
  -8 -15   0    2.51    0.66
  -8 -15   0    3.24    0.52
  -8 -15   0    4.24    0.46
   7  15   0    2.05    0.36
   7  15   0    2.15    0.64
   7  15   0    2.29    0.50
   7  15   0    1.90    0.34
   7  15   0    1.43    0.29
  -7 -15   0    1.49    0.60
  -7 -15   0    1.92    0.33
  -7 -15   0    1.66    0.34
  -7 -15   0    2.11    0.33
  -7 -15   0    2.28    0.43
  -7 -15   0    1.66    0.93
  -7 -15   0    1.80    0.57
  -7 -15   0    1.56    0.37
   6  15   0    8.77    0.94
   6  15   0    9.26    0.66
   6  15   0    8.32    0.60
   6  15   0    7.68    0.85
   6  15   0    7.40    0.62
   6  15   0    6.47    0.98
  -6 -15   0    8.91    1.04
  -6 -15   0    8.18    0.63
  -6 -15   0    8.43    0.63
  -6 -15   0    8.00    0.72
  -6 -15   0    7.95    0.70
  -6 -15   0    6.58    0.96
  -6 -15   0    8.63    0.67
  -6 -15   0    6.93    1.57
   5  15   0    0.26    0.33
   5  15   0    0.22    0.21
   5  15   0    0.07    0.30
   5  15   0    0.06    0.27
   5  15   0   -0.09    0.16
   5  15   0    0.12    0.20
  -5 -15   0   -0.29    0.35
  -5 -15   0    0.03    0.38
  -5 -15   0    0.11    0.20
  -5 -15   0   -0.19    0.19
  -5 -15   0    0.05    0.56
  -5 -15   0   -0.16    0.16
  -5 -15   0    0.22    0.20
  -5 -15   0    0.11    0.25
   4  15   0   19.11    1.54
   4  15   0   20.50    1.18
   4  15   0   19.09    1.35
   4  15   0   21.12    1.18
   4  15   0   20.94    1.15
   4  15   0   21.79    1.44
   4  15   0   21.29    1.16
  -4 -15   0   19.80    1.23
  -4 -15   0   18.90    1.52
  -4 -15   0   22.30    1.21
  -4 -15   0   20.47    1.29
  -4 -15   0   19.87    1.19
  -4 -15   0   20.36    1.27
   3  15   0   12.97    1.00
   3  15   0   12.24    0.74
   3  15   0   11.35    0.71
   3  15   0   11.53    1.19
   3  15   0   12.43    0.73
   3  15   0   10.74    0.90
   3  15   0   12.38    0.75
  -3 -15   0    8.02    1.55
  -3 -15   0   11.55    0.77
  -3 -15   0   11.44    0.86
  -3 -15   0   12.34    0.86
  -3 -15   0   13.02    0.82
  -3 -15   0    9.05    1.10
  -3 -15   0   11.66    0.78
   2  15   0   -0.03    0.35
   2  15   0    0.56    0.18
   2  15   0    0.52    0.17
   2  15   0    0.54    0.29
   2  15   0    1.11    0.38
   2  15   0    0.63    0.18
   2  15   0    0.54    0.17
  -2 -15   0    0.39    0.69
  -2 -15   0    0.45    0.22
  -2 -15   0    0.12    0.24
  -2 -15   0    0.48    0.23
  -2 -15   0    0.89    0.44
  -2 -15   0    0.26    0.26
  -2 -15   0    0.38    0.51
  -2 -15   0    0.59    0.20
   1  15   0    7.38    0.46
   1  15   0    4.68    0.75
   1  15   0    7.37    0.47
   1  15   0    6.48    1.63
   1  15   0    6.14    0.67
   1  15   0    6.78    0.46
   1  15   0    7.04    0.47
   1  15   0    6.81    0.75
  -1 -15   0    6.95    0.70
  -1 -15   0    7.05    0.68
  -1 -15   0    5.19    0.81
  -1 -15   0    4.24    1.32
  -1 -15   0    6.51    0.62
  -1 -15   0    7.26    0.57
  -1 -15   0    7.29    0.57
  -1 -15   0    8.02    1.12
  -1 -15   0    6.98    0.53
   0  15   0    0.28    0.26
   0  15   0    0.13    0.12
   0  15   0    0.04    0.24
   0  15   0    0.40    0.36
   0  15   0   -0.18    0.49
   0  15   0    0.02    0.10
   0  15   0    0.19    0.12
   0  15   0    0.03    0.38
   0  15   0    0.08    0.11
   0  15   0   -0.02    0.26
   0 -15   0    0.09    0.17
   0 -15   0    0.14    0.38
   0 -15   0   -0.06    0.50
   0 -15   0   -0.03    0.16
   0 -15   0   -0.13    0.21
   0 -15   0    0.35    0.30
   0 -15   0   -0.30    0.24
   0 -15   0   -0.07    0.36
  -1  15   0    5.75    0.72
  -1  15   0    6.90    0.63
  -1  15   0    6.43    0.70
  -1  15   0    8.05    1.01
  -1  15   0    6.75    0.40
  -1  15   0    6.62    0.40
  -1  15   0    6.92    0.40
  -1  15   0    6.22    0.80
  -1  15   0    8.46    1.41
   1 -15   0    7.24    0.91
   1 -15   0    6.91    0.70
   1 -15   0    6.26    0.64
   1 -15   0    6.93    0.53
   1 -15   0    7.50    0.56
   1 -15   0    5.96    0.97
   1 -15   0    6.76    0.57
  -2  15   0    0.17    0.31
  -2  15   0    0.34    0.26
  -2  15   0    0.35    0.26
  -2  15   0    0.45    0.41
  -2  15   0    0.41    0.24
  -2  15   0    0.81    0.38
  -2  15   0    0.28    0.63
   2 -15   0    0.32    0.44
   2 -15   0    0.44    0.30
   2 -15   0    0.35    0.20
   2 -15   0    0.64    0.40
   2 -15   0    0.69    0.22
   2 -15   0    0.59    0.27
   2 -15   0    0.41    0.31
  -3  15   0   11.68    0.79
  -3  15   0   11.94    1.00
  -3  15   0   11.21    0.88
  -3  15   0   13.24    1.78
  -3  15   0   11.86    0.95
  -3  15   0   12.93    1.18
  -3  15   0   11.51    0.83
   3 -15   0   11.42    0.75
   3 -15   0   10.77    1.31
   3 -15   0   12.97    0.80
   3 -15   0   10.99    1.05
   3 -15   0   11.16    0.88
   3 -15   0   12.00    0.82
   3 -15   0   11.56    0.90
  -4  15   0   20.90    1.61
  -4  15   0   22.45    1.20
  -4  15   0   19.22    1.96
  -4  15   0   22.66    1.43
  -4  15   0   19.87    1.25
  -4  15   0   20.73    1.31
  -4  15   0   17.66    1.39
   4 -15   0   21.07    1.32
   4 -15   0   21.67    1.26
   4 -15   0   19.34    1.51
   4 -15   0   23.25    1.24
   4 -15   0   22.06    1.20
   4 -15   0   21.13    1.33
   4 -15   0   19.28    1.68
  -5  15   0   -0.10    0.31
  -5  15   0    0.01    0.26
  -5  15   0    0.10    0.22
  -5  15   0    0.41    0.57
  -5  15   0    0.17    0.33
  -5  15   0   -0.16    0.20
   5 -15   0   -0.17    0.24
   5 -15   0   -0.09    0.39
   5 -15   0   -0.08    0.27
   5 -15   0    0.11    0.18
   5 -15   0   -0.12    0.37
   5 -15   0    0.15    0.17
   5 -15   0   -0.01    0.27
  -6  15   0    9.32    0.75
  -6  15   0    8.61    1.42
  -6  15   0    7.99    0.64
  -6  15   0    8.81    0.88
  -6  15   0    7.33    0.85
   6 -15   0    8.62    0.77
   6 -15   0    7.26    1.09
   6 -15   0    8.18    0.74
   6 -15   0    7.92    0.94
   6 -15   0    9.79    0.66
   6 -15   0    8.37    0.69
   6 -15   0    9.29    0.62
  -7  15   0    1.16    0.46
  -7  15   0    1.27    0.28
  -7  15   0    2.88    0.53
  -7  15   0    1.01    0.79
   7 -15   0    1.09    0.50
   7 -15   0    2.30    0.30
   7 -15   0    1.44    0.35
   7 -15   0    2.24    0.44
   7 -15   0    2.96    0.76
   7 -15   0    2.19    0.40
   7 -15   0    1.89    0.35
  -8  15   0    5.64    0.76
  -8  15   0    5.03    0.66
  -8  15   0    4.91    0.67
  -8  15   0    3.47    0.39
   8 -15   0    4.20    0.50
   8 -15   0    3.76    0.55
   8 -15   0    2.99    0.66
   8 -15   0    3.12    0.48
  -9  15   0    4.35    0.67
  -9  15   0    4.70    0.76
  -9  15   0    3.92    0.42
  -9  15   0    4.24    0.65
   9 -15   0    4.07    0.53
   9 -15   0    4.36    0.74
   9 -15   0    4.93    0.57
   9 -15   0    4.68    0.59
 -10  15   0    5.56    0.86
 -10  15   0    5.57    0.75
 -10  15   0    5.14    0.73
  10 -15   0    4.29    0.62
  10 -15   0    7.02    0.95
  10 -15   0    5.58    0.60
 -11  15   0   17.50    1.36
 -11  15   0   19.68    1.41
 -11  15   0   21.51    1.58
  11 -15   0   18.31    1.49
  11 -15   0   16.90    1.25
 -12  15   0    0.64    0.43
 -12  15   0   -0.25    0.40
 -12  15   0   -0.14    0.36
  12 -15   0    0.27    0.37
  12 -15   0   -0.26    0.42
 -13  15   0    2.73    0.70
 -13  15   0    2.20    0.58
  13 -15   0    2.00    0.51
  13 -15   0    1.75    0.63
  12  16   0   18.25    1.32
  12  16   0   20.92    1.28
  12  16   0   18.94    1.55
  12  16   0   21.34    1.34
  12  16   0   21.03    1.90
 -12 -16   0   19.69    1.78
 -12 -16   0   18.38    1.63
 -12 -16   0   20.75    1.33
 -12 -16   0   22.11    1.37
 -12 -16   0   21.14    2.45
 -12 -16   0   20.52    1.24
  11  16   0    6.22    0.92
  11  16   0    7.73    0.67
  11  16   0    5.85    1.15
  11  16   0    6.91    0.73
  11  16   0    8.29    0.73
 -11 -16   0    7.20    1.09
 -11 -16   0    7.93    0.65
 -11 -16   0    8.18    0.68
 -11 -16   0    8.44    1.77
 -11 -16   0    7.41    0.70
 -11 -16   0    7.76    1.15
 -11 -16   0    8.12    0.81
  10  16   0    8.70    0.73
  10  16   0    9.21    1.06
  10  16   0   10.45    0.80
  10  16   0    8.82    0.80
  10  16   0    8.83    1.30
 -10 -16   0   10.40    0.77
 -10 -16   0   10.10    0.87
 -10 -16   0    9.53    0.74
 -10 -16   0    8.57    1.26
 -10 -16   0    9.56    1.25
 -10 -16   0   11.11    0.82
 -10 -16   0    9.69    0.84
 -10 -16   0   10.27    1.76
   9  16   0   15.26    1.29
   9  16   0   16.73    1.53
   9  16   0   16.92    1.06
   9  16   0   16.02    1.09
   9  16   0   17.98    1.14
  -9 -16   0   17.20    1.20
  -9 -16   0   17.28    1.74
  -9 -16   0   15.61    1.17
  -9 -16   0   14.61    1.44
  -9 -16   0   16.80    1.07
  -9 -16   0   18.46    1.11
  -9 -16   0   18.07    2.26
  -9 -16   0   18.99    1.16
   8  16   0   10.54    1.03
   8  16   0   11.80    0.80
   8  16   0   12.25    0.84
   8  16   0   12.17    0.85
   8  16   0   11.09    1.38
  -8 -16   0   11.92    0.87
  -8 -16   0   10.78    1.85
  -8 -16   0   11.17    0.92
  -8 -16   0   11.89    1.34
  -8 -16   0   11.96    0.83
  -8 -16   0   11.62    1.37
  -8 -16   0    9.96    0.91
  -8 -16   0   11.74    0.82
   7  16   0   36.44    2.39
   7  16   0   42.69    2.18
   7  16   0   44.32    2.24
   7  16   0   39.22    2.69
   7  16   0   39.41    2.18
  -7 -16   0   40.32    3.58
  -7 -16   0   38.15    2.61
  -7 -16   0   43.35    2.23
  -7 -16   0   40.81    2.32
  -7 -16   0   40.42    2.33
  -7 -16   0   41.45    2.21
  -7 -16   0   43.23    2.69
  -7 -16   0   42.65    2.27
   6  16   0    1.73    0.32
   6  16   0    1.10    0.28
   6  16   0    1.78    0.30
   6  16   0    0.93    0.41
   6  16   0    1.41    0.53
  -6 -16   0    1.78    0.60
  -6 -16   0    1.44    0.33
  -6 -16   0    1.03    0.28
  -6 -16   0    1.90    1.02
  -6 -16   0    1.34    0.39
  -6 -16   0    2.28    0.42
  -6 -16   0    0.88    0.29
  -6 -16   0    1.08    0.52
   5  16   0   24.98    1.38
   5  16   0   23.37    1.83
   5  16   0   24.91    1.37
   5  16   0   25.06    1.62
   5  16   0   25.56    1.41
   5  16   0   26.74    1.70
  -5 -16   0   27.13    1.45
  -5 -16   0   20.74    2.53
  -5 -16   0   25.15    1.83
  -5 -16   0   25.69    1.43
  -5 -16   0   21.92    1.76
  -5 -16   0   25.14    1.51
  -5 -16   0   25.20    1.53
  -5 -16   0   25.67    1.55
   4  16   0   18.07    1.01
   4  16   0   19.93    1.34
   4  16   0   17.26    1.00
   4  16   0   13.81    1.37
   4  16   0   18.53    1.04
   4  16   0   16.17    1.20
  -4 -16   0   16.11    1.15
  -4 -16   0   19.13    1.09
  -4 -16   0   19.22    1.42
  -4 -16   0   18.15    1.07
  -4 -16   0   19.10    1.18
  -4 -16   0   13.64    2.06
  -4 -16   0   16.15    1.41
   3  16   0    8.16    0.54
   3  16   0    6.29    0.92
   3  16   0    7.89    0.54
   3  16   0    7.28    0.51
   3  16   0    7.13    0.52
   3  16   0    7.62    0.86
   3  16   0    6.67    0.75
  -3 -16   0    7.41    0.97
  -3 -16   0    6.94    0.72
  -3 -16   0    7.71    0.60
  -3 -16   0    7.67    0.60
  -3 -16   0    6.84    0.68
  -3 -16   0    4.88    1.41
   2  16   0   28.32    1.72
   2  16   0   22.47    1.55
   2  16   0   25.87    1.36
   2  16   0   26.72    1.37
   2  16   0   22.25    1.71
   2  16   0   25.76    1.38
   2  16   0   25.21    1.36
  -2 -16   0   25.26    1.82
  -2 -16   0   27.20    1.47
  -2 -16   0   25.98    1.57
  -2 -16   0   27.22    1.56
  -2 -16   0   26.39    1.46
   1  16   0   12.94    0.74
   1  16   0   14.13    0.72
   1  16   0   12.88    0.74
   1  16   0   12.70    1.06
   1  16   0   13.49    0.75
   1  16   0   12.01    0.94
   1  16   0   11.47    1.22
  -1 -16   0   13.26    1.20
  -1 -16   0   13.64    0.87
  -1 -16   0   10.52    1.83
  -1 -16   0   14.40    0.99
  -1 -16   0   13.53    0.85
  -1 -16   0   12.00    0.95
   0  16   0   38.93    1.95
   0  16   0   38.56    2.19
   0  16   0   38.08    1.95
   0  16   0   38.21    1.94
   0  16   0   41.74    2.33
   0  16   0   37.19    2.39
   0 -16   0   39.41    2.21
   0 -16   0   42.05    2.10
   0 -16   0   38.79    2.19
   0 -16   0   40.05    2.10
   0 -16   0   38.37    2.44
  -1  16   0   11.58    0.91
  -1  16   0   11.66    1.09
  -1  16   0   13.71    1.07
   1 -16   0   13.51    0.88
   1 -16   0   13.15    0.82
   1 -16   0   10.76    1.21
   1 -16   0   13.87    0.98
   1 -16   0   13.12    0.98
  -2  16   0   26.58    1.52
  -2  16   0   27.08    1.70
  -2  16   0   24.36    1.54
  -2  16   0   24.42    1.73
   2 -16   0   26.26    1.61
   2 -16   0   28.55    1.47
   2 -16   0   26.32    1.82
   2 -16   0   25.17    1.50
   2 -16   0   26.89    1.59
  -3  16   0    6.59    0.86
  -3  16   0    7.47    0.65
  -3  16   0    7.96    0.85
  -3  16   0    9.29    0.72
   3 -16   0    7.05    0.67
   3 -16   0    7.37    0.96
   3 -16   0    8.24    0.59
   3 -16   0    7.36    0.75
   3 -16   0    7.52    0.77
  -4  16   0   16.85    1.32
  -4  16   0   19.17    1.30
  -4  16   0   17.27    1.14
   4 -16   0   19.13    1.16
   4 -16   0   18.94    1.24
   4 -16   0   18.94    1.09
   4 -16   0   18.64    1.25
   4 -16   0   17.36    1.44
  -5  16   0   25.62    1.65
  -5  16   0   23.33    1.66
  -5  16   0   25.81    1.47
   5 -16   0   26.33    1.79
   5 -16   0   26.47    1.59
   5 -16   0   24.98    1.49
   5 -16   0   25.01    1.56
   5 -16   0   25.80    1.43
  -6  16   0    1.39    0.31
  -6  16   0    1.30    0.45
  -6  16   0    2.22    0.48
  -6  16   0    0.97    0.43
   6 -16   0    1.82    0.57
   6 -16   0    1.19    0.41
   6 -16   0    1.71    0.39
   6 -16   0    0.97    0.40
   6 -16   0    1.80    0.31
  -7  16   0   43.76    2.55
  -7  16   0   39.40    2.24
  -7  16   0   46.68    2.57
  -7  16   0   45.26    2.51
   7 -16   0   44.81    2.42
   7 -16   0   41.57    2.37
   7 -16   0   38.17    2.57
   7 -16   0   44.03    2.33
  -8  16   0   14.33    1.16
  -8  16   0   13.16    1.08
  -8  16   0   14.44    1.16
  -8  16   0   11.09    0.77
   8 -16   0   12.81    0.91
   8 -16   0   13.05    0.98
   8 -16   0   11.07    0.97
   8 -16   0   12.36    1.17
  -9  16   0   17.81    1.32
  -9  16   0   18.00    1.38
  -9  16   0   21.01    1.48
   9 -16   0   16.59    1.23
   9 -16   0   16.22    1.44
   9 -16   0   17.18    1.16
 -10  16   0   13.36    1.08
 -10  16   0   11.76    1.17
 -10  16   0   10.84    1.21
  10 -16   0   10.10    1.21
  10 -16   0    9.85    0.93
 -11  16   0   10.06    1.06
 -11  16   0    9.49    1.15
 -11  16   0    8.28    0.94
  11 -16   0    6.82    1.06
  11 -16   0    7.81    0.85
 -12  16   0   21.78    1.74
 -12  16   0   24.44    1.61
  12 -16   0   20.72    1.45
  12 -16   0   18.03    1.62
  10  17   0    7.74    0.68
  10  17   0    7.01    1.20
  10  17   0    7.99    0.66
  10  17   0    7.13    0.69
  10  17   0    7.11    0.93
 -10 -17   0    7.06    1.15
 -10 -17   0    7.58    0.76
 -10 -17   0    6.83    1.64
 -10 -17   0    7.32    0.68
 -10 -17   0    7.04    0.79
 -10 -17   0    6.45    0.66
 -10 -17   0    4.83    0.96
   9  17   0    6.86    0.66
   9  17   0    7.85    0.95
   9  17   0    6.98    1.16
   9  17   0    7.64    0.62
   9  17   0    7.57    0.66
  -9 -17   0    7.45    0.81
  -9 -17   0    6.69    0.75
  -9 -17   0    7.90    0.66
  -9 -17   0    7.14    0.64
  -9 -17   0    6.42    1.09
  -9 -17   0    7.02    0.68
  -9 -17   0    6.67    1.10
  -9 -17   0    6.64    1.66
   8  17   0   13.27    1.58
   8  17   0   16.21    0.98
   8  17   0   14.76    1.25
   8  17   0   16.44    1.02
   8  17   0   14.02    0.98
  -8 -17   0   15.66    1.14
  -8 -17   0   16.89    1.15
  -8 -17   0   15.31    1.02
  -8 -17   0   14.79    1.43
  -8 -17   0   14.40    1.01
  -8 -17   0   17.07    1.17
  -8 -17   0   14.34    2.16
  -8 -17   0   14.59    1.61
   7  17   0    0.16    0.22
   7  17   0   -0.12    0.23
   7  17   0   -0.72    0.45
   7  17   0   -0.51    0.32
   7  17   0    0.38    0.24
  -7 -17   0    0.04    0.45
  -7 -17   0   -0.01    0.28
  -7 -17   0   -0.10    0.30
  -7 -17   0   -0.14    0.21
  -7 -17   0    0.10    0.73
  -7 -17   0   -0.30    0.30
  -7 -17   0   -0.05    0.22
   6  17   0   28.37    1.55
   6  17   0   24.20    1.74
   6  17   0   24.42    2.01
   6  17   0   27.07    1.51
   6  17   0   26.81    1.52
  -6 -17   0   23.34    2.81
  -6 -17   0   29.06    1.59
  -6 -17   0   30.66    1.61
  -6 -17   0   32.99    2.12
  -6 -17   0   29.97    1.71
  -6 -17   0   27.84    1.70
  -6 -17   0   26.38    1.99
   5  17   0    7.17    0.82
   5  17   0    6.36    0.52
   5  17   0    7.09    0.55
   5  17   0    6.41    0.51
   5  17   0    7.72    1.10
  -5 -17   0    7.39    0.73
  -5 -17   0    5.19    1.57
  -5 -17   0    5.86    0.96
  -5 -17   0    7.32    0.60
  -5 -17   0    6.66    1.02
  -5 -17   0    7.37    0.76
  -5 -17   0    6.06    0.61
   4  17   0   37.05    1.92
   4  17   0   38.47    2.28
   4  17   0   36.02    1.90
   4  17   0   36.37    2.43
   4  17   0   37.74    1.91
   4  17   0   34.11    2.14
  -4 -17   0   39.67    2.01
  -4 -17   0   38.04    2.00
  -4 -17   0   39.52    2.14
  -4 -17   0   28.68    3.25
  -4 -17   0   37.57    2.43
  -4 -17   0   32.02    2.36
  -4 -17   0   37.97    2.11
   3  17   0   26.28    1.38
   3  17   0   26.51    1.38
   3  17   0   23.42    1.85
   3  17   0   23.46    1.60
   3  17   0   25.59    1.40
   3  17   0   25.52    1.38
   3  17   0   29.02    1.78
  -3 -17   0   27.16    1.50
  -3 -17   0   26.59    1.61
  -3 -17   0   25.48    1.48
  -3 -17   0   28.41    1.61
  -3 -17   0   24.10    1.86
   2  17   0    1.39    0.19
   2  17   0    1.60    0.47
   2  17   0    1.36    0.21
   2  17   0    1.20    0.20
   2  17   0    1.26    0.19
   2  17   0    1.02    0.36
   2  17   0    0.90    0.49
  -2 -17   0    0.67    0.33
  -2 -17   0    1.38    0.32
  -2 -17   0    1.26    0.91
  -2 -17   0    1.34    0.56
  -2 -17   0    1.27    0.30
  -2 -17   0    1.66    0.43
   1  17   0    9.23    0.53
   1  17   0    9.00    0.53
   1  17   0    8.65    0.94
   1  17   0    8.46    1.06
   1  17   0    8.61    0.79
   1  17   0    9.19    0.54
  -1 -17   0    8.46    1.11
  -1 -17   0    7.25    1.85
  -1 -17   0    9.60    0.69
  -1 -17   0    9.41    0.80
  -1 -17   0    8.69    0.67
  -1 -17   0    9.82    0.83
   0  17   0    0.05    0.06
   0  17   0   -0.64    0.25
   0  17   0   -0.14    0.26
   0  17   0    0.24    0.42
   0 -17   0   -0.29    0.22
   0 -17   0    0.26    0.72
   0 -17   0   -0.28    0.38
   0 -17   0   -0.29    0.26
   0 -17   0   -0.57    0.26
   0 -17   0   -0.31    0.19
  -1  17   0    7.02    0.72
  -1  17   0    8.88    1.04
  -1  17   0    9.31    0.94
   1 -17   0    9.86    1.14
   1 -17   0    7.02    1.82
   1 -17   0    9.18    0.71
   1 -17   0    9.66    0.82
   1 -17   0    8.76    0.65
   1 -17   0    9.83    0.84
  -2  17   0    1.02    0.34
  -2  17   0    1.02    0.34
  -2  17   0    1.46    0.52
  -2  17   0    1.70    0.46
   2 -17   0    1.30    0.34
   2 -17   0    1.01    0.28
   2 -17   0    1.11    0.39
   2 -17   0    0.69    0.39
   2 -17   0    1.46    0.55
  -3  17   0   27.87    1.82
  -3  17   0   28.26    1.65
  -3  17   0   24.52    1.55
  -3  17   0   25.18    1.70
   3 -17   0   28.08    1.50
   3 -17   0   27.73    1.56
   3 -17   0   24.48    1.62
   3 -17   0   27.15    1.67
   3 -17   0   25.57    1.86
  -4  17   0   37.65    2.32
  -4  17   0   39.35    2.42
  -4  17   0   35.62    2.14
  -4  17   0   39.14    2.29
   4 -17   0   40.77    2.29
   4 -17   0   38.80    2.52
   4 -17   0   41.73    2.27
   4 -17   0   40.46    2.11
   4 -17   0   41.45    2.18
  -5  17   0    6.43    0.79
  -5  17   0    6.10    0.59
  -5  17   0    7.78    0.92
  -5  17   0    6.30    0.79
   5 -17   0    7.87    0.65
   5 -17   0    6.93    0.77
   5 -17   0    7.73    1.02
   5 -17   0    7.29    0.82
   5 -17   0    7.67    0.71
  -6  17   0   31.81    1.93
  -6  17   0   32.54    1.92
  -6  17   0   28.40    1.64
  -6  17   0   29.04    1.93
   6 -17   0   26.47    2.02
   6 -17   0   31.20    1.84
   6 -17   0   28.49    1.79
   6 -17   0   29.25    1.72
  -7  17   0    0.10    0.20
  -7  17   0   -0.21    0.38
  -7  17   0   -0.72    0.29
  -7  17   0    0.04    0.35
   7 -17   0   -0.29    0.33
   7 -17   0   -0.40    0.43
   7 -17   0   -0.30    0.30
   7 -17   0   -0.98    0.31
  -8  17   0   18.09    1.32
  -8  17   0   15.85    1.33
  -8  17   0   16.69    1.26
   8 -17   0   14.92    1.54
   8 -17   0   15.18    1.19
   8 -17   0   14.30    1.08
  -9  17   0    8.69    0.93
  -9  17   0    8.37    1.04
  -9  17   0    7.45    0.93
   9 -17   0    6.56    0.81
   9 -17   0    6.42    1.00
   9 -17   0    6.60    0.92
 -10  17   0    6.74    0.90
 -10  17   0    6.37    0.84
 -10  17   0    7.24    1.02
  10 -17   0    6.28    0.98
  10 -17   0    7.08    0.83
   9  18   0    6.89    0.60
   9  18   0    6.03    0.62
   9  18   0    5.42    0.81
   9  18   0    8.33    0.65
   9  18   0    5.46    1.09
  -9 -18   0    6.83    1.75
  -9 -18   0    6.42    1.11
  -9 -18   0    6.98    0.68
  -9 -18   0    6.39    0.64
  -9 -18   0    5.02    1.01
  -9 -18   0    5.20    0.74
   8  18   0    0.72    0.26
   8  18   0    0.03    0.25
   8  18   0    0.62    0.25
   8  18   0    0.40    0.38
   8  18   0   -0.29    0.51
  -8 -18   0    0.14    0.52
  -8 -18   0   -0.34    0.29
  -8 -18   0    0.19    0.25
  -8 -18   0    0.24    0.27
  -8 -18   0    0.06    0.81
  -8 -18   0    1.10    0.62
   7  18   0    1.20    0.28
   7  18   0    0.74    0.60
   7  18   0    0.42    0.25
   7  18   0    1.14    0.27
   7  18   0    1.23    0.47
  -7 -18   0    1.13    0.58
  -7 -18   0    0.50    0.54
  -7 -18   0    0.63    0.87
  -7 -18   0    1.04    0.42
  -7 -18   0    0.65    0.29
  -7 -18   0    1.19    0.40
  -7 -18   0    0.33    0.26
   6  18   0   -0.32    0.33
   6  18   0    0.50    0.21
   6  18   0    0.31    0.21
   6  18   0    0.10    0.21
   6  18   0    0.37    0.54
  -6 -18   0   -0.39    0.25
  -6 -18   0   -0.17    0.64
  -6 -18   0    0.26    0.25
  -6 -18   0   -0.45    0.38
  -6 -18   0    0.08    0.33
  -6 -18   0    0.27    0.48
  -6 -18   0   -0.32    0.22
   5  18   0    2.12    0.52
   5  18   0    1.80    0.28
   5  18   0    1.60    0.27
   5  18   0    2.46    0.30
   5  18   0    1.64    0.57
  -5 -18   0    1.35    0.34
  -5 -18   0    2.38    0.75
  -5 -18   0    2.28    0.37
  -5 -18   0    1.98    0.43
  -5 -18   0    1.83    0.59
  -5 -18   0    1.20    1.02
  -5 -18   0    1.82    0.45
   4  18   0    0.42    0.18
   4  18   0    0.55    0.19
   4  18   0    0.15    0.33
   4  18   0    0.25    0.52
   4  18   0    0.62    0.18
  -4 -18   0   -0.06    0.78
  -4 -18   0   -0.05    0.45
  -4 -18   0    0.62    0.52
  -4 -18   0   -0.08    0.31
  -4 -18   0    0.65    0.28
  -4 -18   0    0.35    0.31
  -4 -18   0    0.48    0.23
   3  18   0    9.35    0.57
   3  18   0    8.21    0.88
   3  18   0    7.70    1.10
   3  18   0    8.14    0.96
   3  18   0    8.94    0.56
   3  18   0    8.91    0.56
  -3 -18   0    9.21    0.70
  -3 -18   0    9.18    1.19
  -3 -18   0    8.85    0.80
  -3 -18   0    9.11    0.71
  -3 -18   0    5.61    1.69
  -3 -18   0    9.65    0.85
   2  18   0    1.33    0.57
   2  18   0    1.42    0.49
   2  18   0    1.30    0.17
   2  18   0    1.43    0.19
   2  18   0    1.37    0.40
   2  18   0    1.83    0.20
  -2 -18   0    1.01    0.31
  -2 -18   0    1.75    0.32
  -2 -18   0    1.84    0.41
  -2 -18   0    1.19    0.97
  -2 -18   0    1.20    0.40
  -2 -18   0    2.45    0.72
   1  18   0    1.12    0.46
   1  18   0    0.73    0.36
   1  18   0    0.57    0.11
   1  18   0    0.15    0.47
  -1 -18   0    0.97    0.95
  -1 -18   0    0.78    0.30
  -1 -18   0    1.27    0.41
  -1 -18   0    0.68    0.27
  -1 -18   0    0.58    0.34
  -1 -18   0    0.61    0.50
   0  18   0    0.65    0.41
   0  18   0    0.89    0.50
   0  18   0    0.45    0.32
   0 -18   0    0.45    0.49
   0 -18   0   -0.14    0.30
   0 -18   0    0.35    0.82
   0 -18   0    0.38    0.24
   0 -18   0    0.15    0.33
   0 -18   0    0.63    0.28
  -1  18   0    0.75    0.34
  -1  18   0    0.61    0.48
  -1  18   0    1.26    0.47
   1 -18   0    0.88    0.34
   1 -18   0    0.25    0.34
   1 -18   0    0.19    0.46
   1 -18   0    0.10    0.38
   1 -18   0    0.42    0.25
   1 -18   0    0.79    0.91
  -2  18   0    1.12    0.34
  -2  18   0    1.27    0.44
  -2  18   0    1.51    0.53
   2 -18   0    1.10    0.28
   2 -18   0    1.62    0.61
   2 -18   0    1.44    0.37
   2 -18   0    1.01    0.44
   2 -18   0    0.38    0.40
  -3  18   0    9.78    1.25
  -3  18   0    8.76    0.74
  -3  18   0    8.57    0.94
  -3  18   0    7.64    1.01
   3 -18   0    9.20    0.94
   3 -18   0    9.87    0.70
   3 -18   0    8.80    0.88
   3 -18   0    7.82    0.76
   3 -18   0    9.42    1.17
  -4  18   0    0.22    0.31
  -4  18   0    0.12    0.41
  -4  18   0    0.36    0.37
  -4  18   0    0.07    0.24
   4 -18   0   -0.14    0.29
   4 -18   0   -0.66    0.29
   4 -18   0    0.19    0.34
   4 -18   0    0.35    0.47
   4 -18   0   -0.10    0.36
  -5  18   0    2.22    0.50
  -5  18   0    2.61    0.54
  -5  18   0    1.60    0.54
  -5  18   0    1.75    0.34
   5 -18   0    1.68    0.42
   5 -18   0    2.39    0.55
   5 -18   0    1.59    0.61
   5 -18   0    1.23    0.46
  -6  18   0    0.15    0.41
  -6  18   0   -0.54    0.31
  -6  18   0    0.09    0.36
  -6  18   0    0.16    0.22
   6 -18   0   -0.58    0.35
   6 -18   0    0.29    0.54
   6 -18   0   -0.72    0.37
   6 -18   0   -0.15    0.32
  -7  18   0    1.01    0.42
  -7  18   0   -0.04    0.39
  -7  18   0    0.77    0.47
   7 -18   0    0.66    0.58
   7 -18   0   -0.37    0.33
   7 -18   0    0.39    0.45
  -8  18   0    0.06    0.39
  -8  18   0    0.38    0.39
  -8  18   0    0.23    0.40
   8 -18   0   -0.16    0.34
   8 -18   0    0.30    0.53
   8 -18   0   -0.96    0.37
  -9  18   0    5.63    0.86
  -9  18   0    5.64    0.87
  -9  18   0    5.17    0.78
   9 -18   0    5.61    0.77
   9 -18   0    5.49    0.98
   7  19   0    0.77    0.45
   7  19   0    0.62    0.23
   7  19   0    0.63    0.24
   7  19   0    0.59    0.60
  -7 -19   0    0.03    0.34
  -7 -19   0    0.97    0.53
  -7 -19   0   -0.05    0.87
  -7 -19   0    0.30    0.28
  -7 -19   0    1.23    0.63
  -7 -19   0    0.37    0.27
   6  19   0    3.42    0.37
   6  19   0    3.07    0.83
   6  19   0    3.36    0.64
   6  19   0    3.96    0.39
  -6 -19   0    3.08    0.56
  -6 -19   0    2.75    1.38
  -6 -19   0    3.79    0.59
  -6 -19   0    3.22    0.47
  -6 -19   0    3.23    0.82
  -6 -19   0    2.99    0.80
  -6 -19   0    3.49    0.47
   5  19   0    2.70    0.82
   5  19   0    3.60    0.37
   5  19   0    2.54    0.59
   5  19   0    4.22    0.38
  -5 -19   0    3.63    0.49
  -5 -19   0    3.76    0.58
  -5 -19   0    3.85    0.61
  -5 -19   0    2.51    0.76
  -5 -19   0    4.30    0.52
  -5 -19   0    3.93    0.88
  -5 -19   0    2.66    1.29
   4  19   0    7.94    0.52
   4  19   0    7.57    0.89
   4  19   0    6.93    1.09
   4  19   0    8.29    0.52
  -4 -19   0    8.42    0.70
  -4 -19   0    6.10    1.86
  -4 -19   0    6.06    1.06
  -4 -19   0    8.50    0.70
  -4 -19   0    9.15    1.23
  -4 -19   0    7.72    0.83
  -4 -19   0    8.68    0.89
   3  19   0   20.22    1.00
   3  19   0   18.99    0.99
   3  19   0   17.03    1.76
   3  19   0   15.00    1.28
   3  19   0   19.37    0.99
  -3 -19   0   14.34    2.38
  -3 -19   0   19.50    1.21
  -3 -19   0   18.69    1.31
  -3 -19   0   20.25    1.35
  -3 -19   0   18.58    1.64
  -3 -19   0   19.75    1.20
   2  19   0   -0.12    0.42
   2  19   0    0.20    0.33
   2  19   0    0.00    0.37
  -2 -19   0    0.22    0.36
  -2 -19   0   -0.15    0.20
  -2 -19   0    0.36    0.52
  -2 -19   0    0.66    0.89
  -2 -19   0   -0.03    0.27
  -2 -19   0    0.32    0.33
   1  19   0   11.88    1.36
   1  19   0   12.20    0.99
   1  19   0   13.52    1.15
  -1 -19   0   12.58    1.03
  -1 -19   0    9.21    2.26
  -1 -19   0   13.01    1.05
  -1 -19   0   13.31    0.92
  -1 -19   0   13.01    0.89
  -1 -19   0   13.14    1.46
   0  19   0    0.17    0.39
   0  19   0   -0.38    0.28
   0  19   0   -0.41    0.37
   0 -19   0   -0.17    0.21
   0 -19   0   -0.06    0.27
   0 -19   0   -0.28    0.34
   0 -19   0   -0.40    0.42
   0 -19   0   -0.04    0.76
   0 -19   0   -0.01    0.37
  -1  19   0   12.50    1.34
  -1  19   0   13.71    1.17
  -1  19   0   13.28    0.98
   1 -19   0   13.19    0.88
   1 -19   0    7.24    2.09
   1 -19   0   12.30    1.05
   1 -19   0   12.14    1.05
   1 -19   0   13.79    0.94
   1 -19   0   12.34    1.42
  -2  19   0    0.66    0.33
  -2  19   0    0.42    0.41
  -2  19   0    0.29    0.46
   2 -19   0    0.29    0.51
   2 -19   0   -0.47    0.34
   2 -19   0    0.47    0.26
   2 -19   0   -0.33    0.27
   2 -19   0   -0.39    0.36
   2 -19   0    0.41    0.78
  -3  19   0   19.77    1.45
  -3  19   0   17.74    1.49
  -3  19   0   18.28    1.20
   3 -19   0   18.90    1.36
   3 -19   0   19.33    1.24
   3 -19   0   19.08    1.38
   3 -19   0   16.96    1.61
  -4  19   0    7.22    1.00
  -4  19   0    8.14    0.92
  -4  19   0    7.62    0.66
   4 -19   0    6.51    0.85
   4 -19   0    7.02    1.08
   4 -19   0    6.59    0.81
   4 -19   0    7.45    0.75
  -5  19   0    3.63    0.66
  -5  19   0    3.48    0.64
  -5  19   0    2.44    0.63
   5 -19   0    2.77    0.61
   5 -19   0    3.62    0.69
   5 -19   0    3.40    0.55
   5 -19   0    3.34    0.83
  -6  19   0    3.12    0.63
  -6  19   0    3.49    0.73
  -6  19   0    3.60    0.64
   6 -19   0    1.97    0.75
   6 -19   0    2.84    0.54
   6 -19   0    1.90    0.59
   6 -19   0    2.08    0.86
  -7  19   0    0.18    0.42
  -7  19   0    1.31    0.52
  -7  19   0    0.92    0.46
   7 -19   0   -0.73    0.40
   7 -19   0    0.38    0.57
   7 -19   0    0.03    0.40
   5  20   0   13.90    1.21
   5  20   0   13.44    1.65
   5  20   0   15.32    0.85
   5  20   0   16.14    0.86
  -5 -20   0   15.55    1.21
  -5 -20   0   16.67    1.06
  -5 -20   0   16.02    1.69
  -5 -20   0   16.02    1.08
  -5 -20   0   14.79    1.67
  -5 -20   0   12.61    2.29
   4  20   0    9.37    0.98
   4  20   0    9.24    1.29
   4  20   0    9.40    0.50
   4  20   0    9.27    0.50
  -4 -20   0    8.13    1.25
  -4 -20   0    8.54    1.03
  -4 -20   0    9.16    0.76
  -4 -20   0    8.81    0.81
  -4 -20   0    8.79    1.24
  -4 -20   0    8.20    0.92
  -4 -20   0    6.21    1.95
   3  20   0    8.13    0.90
   3  20   0    7.21    1.14
  -3 -20   0    7.87    1.21
  -3 -20   0    8.63    0.94
  -3 -20   0    8.36    0.87
  -3 -20   0    9.01    0.76
  -3 -20   0    8.82    1.21
  -3 -20   0    6.79    2.00
  -3 -20   0    8.79    0.73
   2  20   0    9.85    1.32
   2  20   0   10.05    0.92
  -2 -20   0   10.11    0.98
  -2 -20   0   10.06    1.34
  -2 -20   0    9.00    0.78
  -2 -20   0    7.57    2.04
  -2 -20   0   10.13    0.78
  -2 -20   0    9.31    0.99
   1  20   0    5.96    1.11
   1  20   0    4.20    0.62
   1  20   0    2.39    0.76
  -1 -20   0    3.08    1.44
  -1 -20   0    4.77    0.54
  -1 -20   0    5.22    0.72
  -1 -20   0    4.15    0.56
  -1 -20   0    3.27    0.61
  -1 -20   0    4.17    0.95
   0  20   0   21.82    1.80
   0  20   0   21.33    1.48
   0  20   0   25.64    1.72
   0 -20   0   23.51    1.40
   0 -20   0   24.96    1.45
   0 -20   0   18.35    1.83
   0 -20   0   27.01    1.63
   0 -20   0   22.42    1.56
  -1  20   0    4.25    0.86
  -1  20   0    4.64    0.76
  -1  20   0    4.47    0.60
   1 -20   0    2.82    1.46
   1 -20   0    4.64    0.67
   1 -20   0    4.78    0.72
   1 -20   0    4.53    0.52
   1 -20   0    4.90    0.60
   1 -20   0    4.79    0.94
  -2  20   0   10.12    0.82
  -2  20   0    9.87    1.22
  -2  20   0   12.47    1.18
   2 -20   0    9.58    1.01
   2 -20   0    9.04    0.82
   2 -20   0    7.01    2.08
   2 -20   0    9.63    0.97
   2 -20   0   10.56    1.34
  -3  20   0    8.86    1.00
  -3  20   0    8.46    0.71
  -3  20   0    6.18    1.01
   3 -20   0    6.22    1.97
   3 -20   0    8.09    0.79
   3 -20   0    7.86    0.93
   3 -20   0    7.28    1.16
   3 -20   0    9.02    0.93
  -4  20   0    7.78    1.08
  -4  20   0    9.80    1.06
   4 -20   0    9.21    1.03
   4 -20   0   11.00    1.39
   4 -20   0    8.66    0.96
   4 -20   0    9.57    0.88
  -5  20   0   14.44    1.51
  -5  20   0   16.68    1.31
   5 -20   0   14.67    1.26
   5 -20   0   15.91    1.14
   5 -20   0   14.44    1.64
   5 -20   0   15.93    1.33
   5 -20   1    2.97    0.55
   5 -20   1    2.38    0.60
   5 -20   1    3.36    0.85
   5 -20   1    2.90    0.66
  -5  20  -1    3.47    0.69
  -5  20  -1    3.24    0.78
   4 -20   1    0.81    0.51
   4 -20   1    2.05    0.55
   4 -20   1    1.31    0.43
   4 -20   1    1.22    0.65
  -4  20  -1    1.03    0.33
  -4  20  -1    0.94    0.48
  -4  20  -1    2.04    0.62
   3 -20   1    0.60    0.47
   3 -20   1    0.61    0.62
   3 -20   1    0.80    0.39
   3 -20   1    0.70    0.50
  -3  20  -1    1.03    0.35
  -3  20  -1    0.94    0.56
  -3  20  -1    0.56    0.46
   2 -20   1    1.48    0.41
   2 -20   1    1.35    0.68
   2 -20   1    2.25    0.39
   2 -20   1    0.96    0.48
   2 -20   1    1.75    1.19
   2 -20   1    0.94    0.49
  -2  20  -1    1.19    0.54
  -2  20  -1    1.10    0.59
  -2  20  -1    2.10    0.44
   1 -20   1   -0.10    0.29
   1 -20   1    0.15    0.40
   1 -20   1    0.12    0.40
   1 -20   1    0.13    0.72
   1 -20   1    0.39    0.62
   1 -20   1    0.46    0.26
  -1  20  -1   -0.01    0.46
  -1  20  -1    0.78    0.46
  -1  20  -1    1.07    0.38
   0 -20   1    0.46    0.82
   0 -20   1   -0.33    0.44
   0 -20   1   -0.08    0.35
   0 -20   1    0.59    0.34
   0 -20   1    1.28    0.46
   0 -20   1    0.32    0.24
   0  20  -1    0.26    0.51
   0  20  -1   -0.04    0.47
   0  20  -1    0.85    0.38
  -1 -20   1    3.76    0.65
  -1 -20   1    2.27    0.46
  -1 -20   1    4.32    1.64
  -1 -20   1    2.85    0.55
  -1 -20   1    3.62    0.46
  -1 -20   1    0.88    0.68
   1  20  -1    4.32    0.64
   1  20  -1    4.82    0.92
  -2 -20   1    2.99    0.45
  -2 -20   1    2.00    1.21
  -2 -20   1    2.10    0.42
  -2 -20   1    3.14    0.55
  -2 -20   1    2.63    0.76
  -2 -20   1    4.06    0.64
   2  20  -1    3.46    0.79
   2  20  -1    2.33    0.53
  -3 -20   1    1.41    0.36
  -3 -20   1    0.82    0.34
  -3 -20   1    0.73    0.97
  -3 -20   1    0.87    0.41
  -3 -20   1    0.80    0.40
  -3 -20   1    1.09    0.66
   3  20  -1    0.39    0.40
   3  20  -1    1.20    0.15
   3  20  -1    1.33    0.16
   3  20  -1   -0.09    0.55
  -4 -20   1    5.85    1.06
  -4 -20   1    4.34    0.56
  -4 -20   1    5.40    0.57
  -4 -20   1    6.67    0.80
  -4 -20   1    6.71    1.11
  -4 -20   1    3.30    1.53
   4  20  -1    3.47    0.88
   4  20  -1    4.99    0.38
   4  20  -1    3.11    0.62
   4  20  -1    5.24    0.40
  -5 -20   1   -0.04    0.82
  -5 -20   1    0.31    0.29
  -5 -20   1    0.19    0.36
  -5 -20   1   -0.24    0.23
  -5 -20   1   -0.37    0.44
  -5 -20   1    0.41    0.58
   5  20  -1    0.60    0.21
   5  20  -1    0.10    0.17
   5  20  -1    0.08    0.56
   5  20  -1   -0.20    0.35
   7 -19   1    7.39    1.09
   7 -19   1    4.55    1.05
   7 -19   1    6.93    0.77
   7 -19   1    6.85    0.87
  -7  19  -1    5.80    0.96
  -7  19  -1    6.65    0.86
  -7  19  -1    5.93    0.89
   6 -19   1   27.14    1.84
   6 -19   1   27.63    2.13
   6 -19   1   26.71    1.70
   6 -19   1   28.40    1.84
  -6  19  -1   30.78    1.94
  -6  19  -1   29.54    1.91
  -6  19  -1   28.90    2.00
   5 -19   1    2.27    0.58
   5 -19   1    1.88    0.45
   5 -19   1    1.61    0.52
   5 -19   1    2.08    0.74
  -5  19  -1    1.80    0.38
  -5  19  -1    2.82    0.59
  -5  19  -1    3.60    0.67
  -5  19  -1    2.69    0.69
   4 -19   1   19.93    1.39
   4 -19   1   18.60    1.40
   4 -19   1   19.34    1.27
   4 -19   1   17.75    1.60
  -4  19  -1   21.59    1.48
  -4  19  -1   19.83    1.55
  -4  19  -1   18.02    1.22
   3 -19   1    3.39    0.53
   3 -19   1    3.16    0.43
   3 -19   1    2.78    0.74
   3 -19   1    2.45    0.55
[truncated: 11,661,512 more chars]
