# Supplementary material
Source: MDPI journal article supplement (https://www.mdpi.com/2073-4352/11/2/179)
Supplement: s1 [file s1 › 4_rf1690.cif]

 
data_rf1690
 
_audit_creation_method            'SHELXL-2016/6'
_shelx_SHELXL_version_number      '2016/6'
_chemical_name_systematic         ?
_chemical_name_common             '[PrL3(5,5'-Me2bipy)]'
_chemical_melting_point           ?
_chemical_formula_moiety          'C54 H36 F9 N2 O6 Pr'
_chemical_formula_sum
 'C54 H36 F9 N2 O6 Pr' 
_chemical_formula_weight          1120.76

loop_
 _atom_type_symbol
 _atom_type_description
 _atom_type_scat_dispersion_real
 _atom_type_scat_dispersion_imag
 _atom_type_scat_source
 'C'  'C'   0.0033   0.0016
 'International Tables Vol C Tables 4.2.6.8 and 6.1.1.4'
 'H'  'H'   0.0000   0.0000
 'International Tables Vol C Tables 4.2.6.8 and 6.1.1.4'
 'F'  'F'   0.0171   0.0103
 'International Tables Vol C Tables 4.2.6.8 and 6.1.1.4'
 'N'  'N'   0.0061   0.0033
 'International Tables Vol C Tables 4.2.6.8 and 6.1.1.4'
 'O'  'O'   0.0106   0.0060
 'International Tables Vol C Tables 4.2.6.8 and 6.1.1.4'
 'Pr'  'Pr'  -0.2180   2.8214
 'International Tables Vol C Tables 4.2.6.8 and 6.1.1.4'
 
_space_group_crystal_system       orthorhombic
_space_group_IT_number            29
_space_group_name_H-M_alt         'P c a 21'
_space_group_name_Hall            'P 2c -2ac'
 
_shelx_space_group_comment
;
The symmetry employed for this shelxl refinement is uniquely defined
by the following loop, which should always be used as a source of
symmetry information in preference to the above space-group names.
They are only intended as comments.
;
 
loop_
 _space_group_symop_operation_xyz
 'x, y, z'
 '-x, -y, z+1/2'
 'x+1/2, -y, z'
 '-x+1/2, y, z+1/2'
 
_cell_length_a                    20.1848(6)
_cell_length_b                    11.9034(3)
_cell_length_c                    19.6102(6)
_cell_angle_alpha                 90
_cell_angle_beta                  90
_cell_angle_gamma                 90
_cell_volume                      4711.7(2)
_cell_formula_units_Z             4
_cell_measurement_temperature     100(2)
_cell_measurement_reflns_used     9093
_cell_measurement_theta_min       2.24
_cell_measurement_theta_max       29.65
 
_exptl_crystal_description        prism
_exptl_crystal_colour             yellow
_exptl_crystal_density_meas       ?
_exptl_crystal_density_method     ?
_exptl_crystal_density_diffrn     1.580          
_exptl_crystal_F_000              2248
_exptl_transmission_factor_min    ?
_exptl_transmission_factor_max    ?
_exptl_crystal_size_max           0.250
_exptl_crystal_size_mid           0.180
_exptl_crystal_size_min           0.130
_exptl_absorpt_coefficient_mu     1.124
_shelx_estimated_absorpt_T_min    0.766
_shelx_estimated_absorpt_T_max    0.868
_exptl_absorpt_correction_type    multi-scan
_exptl_absorpt_correction_T_min   0.7325
_exptl_absorpt_correction_T_max   0.9003
_exptl_absorpt_process_details    'SADABS'
_exptl_absorpt_special_details    ?
_diffrn_ambient_temperature       100(2)
_diffrn_radiation_wavelength      0.71073
_diffrn_radiation_type            MoK\a
_diffrn_source                    ?
_diffrn_measurement_device_type   'Bruker APEX-II CCD'
_diffrn_measurement_method        '\w-scans'
_diffrn_detector_area_resol_mean  ?
_diffrn_reflns_number             163636
_diffrn_reflns_av_unetI/netI      0.0381
_diffrn_reflns_av_R_equivalents   0.0648
_diffrn_reflns_limit_h_min        -28
_diffrn_reflns_limit_h_max        28
_diffrn_reflns_limit_k_min        -16
_diffrn_reflns_limit_k_max        16
_diffrn_reflns_limit_l_min        -27
_diffrn_reflns_limit_l_max        27
_diffrn_reflns_theta_min          2.241
_diffrn_reflns_theta_max          29.995
_diffrn_reflns_theta_full         29.995
_diffrn_measured_fraction_theta_max   0.999
_diffrn_measured_fraction_theta_full  0.999
_diffrn_reflns_Laue_measured_fraction_max    0.999
_diffrn_reflns_Laue_measured_fraction_full   0.999
_diffrn_reflns_point_group_measured_fraction_max   0.999
_diffrn_reflns_point_group_measured_fraction_full  0.999
_reflns_number_total              13727
_reflns_number_gt                 12338
_reflns_threshold_expression      'I > 2\s(I)'
_reflns_Friedel_coverage          0.946
_reflns_Friedel_fraction_max      0.999
_reflns_Friedel_fraction_full     0.999
 
_reflns_special_details
;
 Reflections were merged by SHELXL according to the crystal
 class for the calculation of statistics and refinement.
 
 _reflns_Friedel_fraction is defined as the number of unique
 Friedel pairs measured divided by the number that would be
 possible theoretically, ignoring centric projections and
 systematic absences.
;
 
_computing_data_collection        'Bruker APEX2'
_computing_cell_refinement        'Bruker SAINT'
_computing_data_reduction         'Bruker SAINT'
_computing_structure_solution     'SHELXT 2014/5 (Sheldrick, 2014)'
_computing_structure_refinement 'SHELXL-2016/6 (Sheldrick, 2016)'
_computing_molecular_graphics     'Bruker SHELXTL'
_computing_publication_material   'Bruker SHELXTL'
_refine_special_details           ?
_refine_ls_structure_factor_coef  Fsqd
_refine_ls_matrix_type            full
_refine_ls_weighting_scheme       calc
_refine_ls_weighting_details
'w=1/[\s^2^(Fo^2^)+(0.0155P)^2^+2.4449P] where P=(Fo^2^+2Fc^2^)/3'
_atom_sites_solution_primary      ?
_atom_sites_solution_secondary    ?
_atom_sites_solution_hydrogens    geom
_refine_ls_hydrogen_treatment     constr
_refine_ls_extinction_method      none
_refine_ls_extinction_coef        .
_refine_ls_abs_structure_details
;
 Flack x determined using 5440 quotients [(I+)-(I-)]/[(I+)+(I-)]
 (Parsons, Flack and Wagner, Acta Cryst. B69 (2013) 249-259).
;
_refine_ls_abs_structure_Flack    -0.012(3)
_chemical_absolute_configuration  ?
_refine_ls_number_reflns          13727
_refine_ls_number_parameters      651
_refine_ls_number_restraints      7
_refine_ls_R_factor_all           0.0329
_refine_ls_R_factor_gt            0.0266
_refine_ls_wR_factor_ref          0.0534
_refine_ls_wR_factor_gt           0.0509
_refine_ls_goodness_of_fit_ref    1.029
_refine_ls_restrained_S_all       1.058
_refine_ls_shift/su_max           0.003
_refine_ls_shift/su_mean          0.000
 
loop_
 _atom_site_label
 _atom_site_type_symbol
 _atom_site_fract_x
 _atom_site_fract_y
 _atom_site_fract_z
 _atom_site_U_iso_or_equiv
 _atom_site_adp_type
 _atom_site_occupancy
 _atom_site_site_symmetry_order  
 _atom_site_calc_flag
 _atom_site_refinement_flags_posn
 _atom_site_refinement_flags_adp
 _atom_site_refinement_flags_occupancy
 _atom_site_disorder_assembly
 _atom_site_disorder_group
Pr1 Pr 0.55141(2) 0.15089(2) 0.53277(2) 0.01127(4) Uani 1 1 d . . . . .
N1 N 0.50391(13) -0.0509(2) 0.50825(13) 0.0174(5) Uani 1 1 d . . . . .
C1 C 0.64482(17) -0.1425(3) 0.66422(17) 0.0204(7) Uani 1 1 d . . . . .
F1 F 0.58369(12) -0.1677(2) 0.68362(14) 0.0443(7) Uani 1 1 d . . . . .
O1 O 0.60259(11) 0.02048(19) 0.61272(11) 0.0176(5) Uani 1 1 d . . . . .
F2 F 0.67630(11) -0.10445(19) 0.71927(10) 0.0308(5) Uani 1 1 d . . . . .
N2 N 0.45006(13) 0.0810(2) 0.60578(14) 0.0173(6) Uani 1 1 d . . . . .
C2 C 0.64519(16) -0.0550(3) 0.60660(16) 0.0160(6) Uani 1 1 d . . . . .
O2 O 0.65298(11) 0.07778(19) 0.48825(11) 0.0171(5) Uani 1 1 d . . . . .
O3 O 0.55136(11) 0.2831(2) 0.62683(11) 0.0171(5) Uani 1 1 d . . . . .
F3 F 0.67469(13) -0.23936(18) 0.64710(11) 0.0363(6) Uani 1 1 d . . . . .
C3 C 0.69306(16) -0.0686(3) 0.55644(16) 0.0180(7) Uani 1 1 d . . . . .
H3 H 0.723742 -0.128877 0.560016 0.022 Uiso 1 1 calc R U . . .
O4 O 0.61296(11) 0.31740(19) 0.50195(11) 0.0172(5) Uani 1 1 d . . . . .
C4 C 0.69712(14) 0.0055(3) 0.49998(16) 0.0142(6) Uani 1 1 d . . . . .
F4 F 0.46671(11) 0.4361(2) 0.69308(13) 0.0430(7) Uani 1 1 d . . . . .
O5 O 0.53829(11) 0.15281(19) 0.40979(12) 0.0171(5) Uani 1 1 d . . . . .
F5 F 0.54836(12) 0.5500(2) 0.70203(13) 0.0437(7) Uani 1 1 d . . . . .
C5 C 0.75426(15) 0.0023(3) 0.45230(16) 0.0137(6) Uani 1 1 d . . . . .
O6 O 0.46261(10) 0.27528(19) 0.50043(11) 0.0165(5) Uani 1 1 d . . . . .
C6 C 0.74899(15) 0.0638(3) 0.39262(16) 0.0150(6) Uani 1 1 d . . . . .
H6 H 0.707628 0.096621 0.380917 0.018 Uiso 1 1 calc R U . . .
F6 F 0.55258(13) 0.3901(2) 0.75071(12) 0.0465(7) Uani 1 1 d . . . . .
F9 F 0.54403(17) 0.3122(3) 0.26105(15) 0.0827(12) Uani 1 1 d . U . . .
C9 C 0.85493(18) 0.1653(3) 0.25040(18) 0.0239(8) Uani 1 1 d . . . . .
H9 H 0.852110 0.212381 0.211373 0.029 Uiso 1 1 calc R U . . .
F8 F 0.62203(10) 0.2195(2) 0.30627(11) 0.0333(5) Uani 1 1 d . . . . .
C8 C 0.79998(17) 0.1475(3) 0.28997(17) 0.0192(7) Uani 1 1 d . . . . .
H8 H 0.759065 0.181523 0.277850 0.023 Uiso 1 1 calc R U . . .
F7 F 0.53682(15) 0.1350(3) 0.26975(14) 0.0698(11) Uani 1 1 d . . . . .
C7 C 0.80368(15) 0.0787(3) 0.34884(16) 0.0152(6) Uani 1 1 d . . . . .
C11 C 0.92077(16) 0.0461(3) 0.32341(18) 0.0228(7) Uani 1 1 d . . . . .
H11 H 0.961935 0.011519 0.333923 0.027 Uiso 1 1 calc R U . . .
C10 C 0.91572(17) 0.1139(3) 0.26754(19) 0.0253(8) Uani 1 1 d . . . . .
H10 H 0.953590 0.126721 0.239839 0.030 Uiso 1 1 calc R U . . .
C12 C 0.86487(15) 0.0268(3) 0.36607(17) 0.0170(7) Uani 1 1 d . . . . .
C13 C 0.86858(15) -0.0399(3) 0.42566(17) 0.0183(7) Uani 1 1 d . . . . .
H13 H 0.908754 -0.077623 0.436310 0.022 Uiso 1 1 calc R U . . .
C15 C 0.53230(18) 0.4431(3) 0.69383(18) 0.0238(7) Uani 1 1 d . . . . .
C14 C 0.81518(15) -0.0510(3) 0.46824(17) 0.0158(6) Uani 1 1 d . . . . .
H14 H 0.818957 -0.094624 0.508626 0.019 Uiso 1 1 calc R U . . .
C16 C 0.56197(15) 0.3885(3) 0.62982(17) 0.0166(6) Uani 1 1 d . . . . .
C17 C 0.59492(16) 0.4572(3) 0.58515(17) 0.0192(7) Uani 1 1 d . . . . .
H17 H 0.599449 0.534640 0.595795 0.023 Uiso 1 1 calc R U . . .
C19 C 0.66541(15) 0.4900(3) 0.47998(17) 0.0165(6) Uani 1 1 d . . . . .
C18 C 0.62271(13) 0.4156(3) 0.52291(18) 0.0154(7) Uani 1 1 d . . . . .
C20 C 0.67981(15) 0.4555(3) 0.41471(17) 0.0173(6) Uani 1 1 d . . . . .
H20 H 0.660699 0.388047 0.397885 0.021 Uiso 1 1 calc R U . . .
C21 C 0.72255(16) 0.5185(3) 0.37207(17) 0.0179(6) Uani 1 1 d . . . . .
C22 C 0.74012(17) 0.4814(3) 0.30566(18) 0.0234(7) Uani 1 1 d . . . . .
H22 H 0.719978 0.415953 0.287247 0.028 Uiso 1 1 calc R U . . .
C23 C 0.78583(18) 0.5392(3) 0.26808(18) 0.0250(8) Uani 1 1 d . . . . .
H23 H 0.797951 0.512930 0.224076 0.030 Uiso 1 1 calc R U . . .
C24 C 0.81511(18) 0.6378(3) 0.29437(19) 0.0243(8) Uani 1 1 d . . . . .
H24 H 0.847340 0.676752 0.268155 0.029 Uiso 1 1 calc R U . . .
C25 C 0.79760(17) 0.6777(3) 0.35700(18) 0.0213(7) Uani 1 1 d . . . . .
H25 H 0.816593 0.745623 0.373308 0.026 Uiso 1 1 calc R U . . .
C26 C 0.75126(16) 0.6188(3) 0.39810(18) 0.0181(6) Uani 1 1 d . . . . .
C27 C 0.73453(17) 0.6534(3) 0.4647(2) 0.0236(7) Uani 1 1 d . . . . .
H27 H 0.752463 0.721456 0.482055 0.028 Uiso 1 1 calc R U . . .
C28 C 0.69325(16) 0.5914(3) 0.50467(18) 0.0220(7) Uani 1 1 d . . . . .
H28 H 0.683024 0.616340 0.549466 0.026 Uiso 1 1 calc R U . . .
C29 C 0.55631(18) 0.2284(4) 0.30163(18) 0.0274(8) Uani 1 1 d . . . . .
C30 C 0.52520(16) 0.2371(3) 0.37291(17) 0.0196(7) Uani 1 1 d . . . . .
C31 C 0.48747(16) 0.3310(3) 0.38818(17) 0.0214(7) Uani 1 1 d . . . . .
H31 H 0.482555 0.387800 0.354547 0.026 Uiso 1 1 calc R U . . .
C32 C 0.45586(15) 0.3454(3) 0.45232(17) 0.0164(6) Uani 1 1 d . . . . .
C33 C 0.41298(15) 0.4448(3) 0.46604(17) 0.0163(6) Uani 1 1 d . . . . .
C34 C 0.38728(13) 0.4577(2) 0.5305(2) 0.0182(5) Uani 1 1 d . . . . .
H34 H 0.397881 0.403900 0.564546 0.022 Uiso 1 1 calc R U . . .
C35 C 0.34562(15) 0.5486(3) 0.54748(15) 0.0180(8) Uani 1 1 d . . . . .
C36 C 0.31890(18) 0.5629(3) 0.61401(18) 0.0233(7) Uani 1 1 d . . . . .
H36 H 0.329706 0.510642 0.648919 0.028 Uiso 1 1 calc R U . . .
C37 C 0.27761(18) 0.6515(3) 0.62821(19) 0.0240(7) Uani 1 1 d . . . . .
H37 H 0.259948 0.660109 0.672815 0.029 Uiso 1 1 calc R U . . .
C38 C 0.26131(17) 0.7297(3) 0.5771(2) 0.0231(7) Uani 1 1 d . . . . .
H38 H 0.232493 0.790502 0.587356 0.028 Uiso 1 1 calc R U . . .
C39 C 0.28653(18) 0.7187(3) 0.51326(18) 0.0229(8) Uani 1 1 d . . . . .
H39 H 0.275131 0.772261 0.479299 0.027 Uiso 1 1 calc R U . . .
C40 C 0.32959(16) 0.6288(3) 0.49640(17) 0.0180(7) Uani 1 1 d . . . . .
C41 C 0.35742(17) 0.6154(3) 0.43021(18) 0.0217(7) Uani 1 1 d . . . . .
H41 H 0.347567 0.668879 0.395718 0.026 Uiso 1 1 calc R U . . .
C42 C 0.39795(16) 0.5271(3) 0.41548(17) 0.0181(7) Uani 1 1 d . . . . .
H42 H 0.416388 0.520345 0.371095 0.022 Uiso 1 1 calc R U . . .
C43 C 0.46620(15) -0.1022(3) 0.55612(17) 0.0176(7) Uani 1 1 d . . . . .
C44 C 0.46130(17) -0.2191(3) 0.55882(19) 0.0233(7) Uani 1 1 d . . . . .
H44 H 0.436447 -0.254528 0.593895 0.028 Uiso 1 1 calc R U . . .
C45 C 0.49287(18) -0.2821(3) 0.51011(19) 0.0262(8) Uani 1 1 d . . . . .
H45 H 0.490638 -0.361793 0.512131 0.031 Uiso 1 1 calc R U . . .
C46 C 0.52809(17) -0.2307(3) 0.45785(19) 0.0232(7) Uani 1 1 d . . . . .
C47 C 0.53322(16) -0.1141(3) 0.46112(18) 0.0201(7) Uani 1 1 d . . . . .
H47 H 0.559325 -0.077427 0.427530 0.024 Uiso 1 1 calc R U . . .
C48 C 0.55863(19) -0.2948(3) 0.3995(2) 0.0330(9) Uani 1 1 d . . . . .
H48A H 0.533640 -0.279897 0.357673 0.049 Uiso 1 1 calc R U . . .
H48B H 0.557410 -0.375457 0.409600 0.049 Uiso 1 1 calc R U . . .
H48C H 0.604698 -0.270874 0.393454 0.049 Uiso 1 1 calc R U . . .
C49 C 0.42989(16) -0.0266(3) 0.60385(17) 0.0177(7) Uani 1 1 d . . . . .
C50 C 0.37654(17) -0.0632(3) 0.64297(19) 0.0257(8) Uani 1 1 d . . . . .
H50 H 0.362430 -0.139248 0.640662 0.031 Uiso 1 1 calc R U . . .
C51 C 0.34432(19) 0.0118(4) 0.6851(2) 0.0287(9) Uani 1 1 d . . . . .
H51 H 0.307758 -0.012680 0.711752 0.034 Uiso 1 1 calc R U . . .
C52 C 0.36495(17) 0.1225(3) 0.68878(19) 0.0246(8) Uani 1 1 d . . . . .
C53 C 0.41822(16) 0.1524(3) 0.64732(18) 0.0219(7) Uani 1 1 d . . . . .
H53 H 0.432895 0.228252 0.648585 0.026 Uiso 1 1 calc R U . . .
C54 C 0.3323(2) 0.2091(4) 0.7337(2) 0.0401(11) Uani 1 1 d . . . . .
H54A H 0.365020 0.265561 0.747366 0.060 Uiso 1 1 calc R U . . .
H54B H 0.314276 0.172388 0.774442 0.060 Uiso 1 1 calc R U . . .
H54C H 0.296271 0.245622 0.708562 0.060 Uiso 1 1 calc R U . . .
 
loop_
 _atom_site_aniso_label
 _atom_site_aniso_U_11
 _atom_site_aniso_U_22
 _atom_site_aniso_U_33
 _atom_site_aniso_U_23
 _atom_site_aniso_U_13
 _atom_site_aniso_U_12
Pr1 0.01049(6) 0.01197(6) 0.01134(6) 0.00067(9) 0.00034(9) 0.00073(5)
N1 0.0148(12) 0.0177(14) 0.0196(13) -0.0011(11) -0.0043(10) -0.0023(11)
C1 0.0260(17) 0.0197(17) 0.0156(16) 0.0028(13) 0.0016(13) 0.0030(13)
F1 0.0287(12) 0.0519(16) 0.0524(16) 0.0321(13) 0.0041(11) -0.0055(11)
O1 0.0182(11) 0.0203(12) 0.0143(11) 0.0026(9) 0.0005(9) 0.0052(9)
F2 0.0487(14) 0.0284(12) 0.0152(10) 0.0008(9) -0.0079(10) 0.0063(10)
N2 0.0140(13) 0.0188(15) 0.0192(14) 0.0022(11) 0.0010(11) 0.0000(10)
C2 0.0195(15) 0.0163(16) 0.0120(14) 0.0012(12) -0.0028(12) -0.0012(12)
O2 0.0149(10) 0.0183(11) 0.0181(11) 0.0038(9) 0.0027(9) 0.0052(9)
O3 0.0189(11) 0.0192(12) 0.0131(11) -0.0011(9) 0.0005(9) -0.0009(9)
F3 0.0715(17) 0.0185(11) 0.0188(11) 0.0040(9) 0.0087(11) 0.0149(11)
C3 0.0180(15) 0.0181(17) 0.0179(15) 0.0008(12) 0.0013(12) 0.0059(13)
O4 0.0172(11) 0.0163(11) 0.0183(11) -0.0036(9) 0.0032(9) -0.0037(9)
C4 0.0133(14) 0.0121(16) 0.0172(15) -0.0021(12) -0.0001(12) -0.0011(11)
F4 0.0208(11) 0.0643(18) 0.0439(15) -0.0265(13) 0.0100(10) -0.0011(11)
O5 0.0193(11) 0.0199(12) 0.0123(11) 0.0000(9) -0.0004(9) 0.0017(9)
F5 0.0538(16) 0.0297(13) 0.0475(15) -0.0218(12) 0.0255(12) -0.0094(11)
C5 0.0151(14) 0.0098(14) 0.0163(15) -0.0024(11) -0.0009(12) 0.0003(11)
O6 0.0157(11) 0.0188(12) 0.0150(11) 0.0040(9) 0.0009(9) 0.0042(9)
C6 0.0123(14) 0.0164(15) 0.0162(15) -0.0023(12) -0.0003(11) 0.0006(12)
F6 0.0671(18) 0.0546(17) 0.0177(12) -0.0108(12) 0.0024(12) 0.0148(13)
F9 0.100(2) 0.108(2) 0.0398(16) 0.0448(17) 0.0405(16) 0.079(2)
C9 0.0269(19) 0.029(2) 0.0161(17) 0.0004(14) 0.0040(14) -0.0046(15)
F8 0.0186(11) 0.0567(16) 0.0247(12) -0.0004(11) 0.0053(9) 0.0033(10)
C8 0.0204(16) 0.0194(17) 0.0179(16) -0.0010(13) 0.0005(13) -0.0011(13)
F7 0.0558(17) 0.125(3) 0.0289(15) -0.0391(17) 0.0171(13) -0.0406(18)
C7 0.0161(14) 0.0147(15) 0.0149(15) -0.0039(12) 0.0006(12) -0.0017(12)
C11 0.0128(15) 0.032(2) 0.0233(18) -0.0061(15) 0.0023(13) -0.0014(14)
C10 0.0197(17) 0.035(2) 0.0215(18) -0.0035(16) 0.0064(14) -0.0055(15)
C12 0.0126(15) 0.0212(18) 0.0172(16) -0.0048(13) 0.0005(12) -0.0027(12)
C13 0.0125(14) 0.0210(17) 0.0214(17) -0.0030(13) -0.0034(12) 0.0013(12)
C15 0.0242(17) 0.0268(19) 0.0203(18) -0.0074(15) 0.0059(14) -0.0016(14)
C14 0.0165(15) 0.0142(15) 0.0165(15) -0.0010(12) -0.0019(12) 0.0003(12)
C16 0.0134(14) 0.0198(16) 0.0165(15) -0.0040(13) -0.0011(12) 0.0024(12)
C17 0.0199(16) 0.0166(16) 0.0210(17) -0.0050(13) 0.0036(13) -0.0002(13)
C19 0.0151(15) 0.0132(15) 0.0213(16) 0.0002(12) 0.0013(12) -0.0014(11)
C18 0.0122(12) 0.0159(13) 0.018(2) 0.0011(13) 0.0017(12) 0.0004(10)
C20 0.0181(15) 0.0142(15) 0.0197(16) -0.0028(13) -0.0011(12) -0.0024(12)
C21 0.0185(15) 0.0173(16) 0.0179(16) -0.0001(13) -0.0021(13) -0.0007(12)
C22 0.0269(18) 0.0237(19) 0.0197(17) -0.0036(14) 0.0006(14) -0.0059(15)
C23 0.0266(18) 0.032(2) 0.0165(17) 0.0044(15) 0.0002(14) -0.0019(15)
C24 0.0238(17) 0.0241(19) 0.0249(18) 0.0126(14) 0.0004(14) -0.0024(14)
C25 0.0207(16) 0.0156(16) 0.0278(19) 0.0043(14) -0.0011(14) -0.0024(13)
C26 0.0182(15) 0.0130(15) 0.0230(17) 0.0016(13) -0.0004(13) -0.0004(12)
C27 0.0258(18) 0.0154(16) 0.0297(19) -0.0069(14) 0.0040(15) -0.0069(14)
C28 0.0258(17) 0.0184(17) 0.0219(16) -0.0073(14) 0.0047(14) -0.0032(13)
C29 0.0233(18) 0.044(2) 0.0150(16) 0.0040(16) 0.0017(14) 0.0111(16)
C30 0.0137(14) 0.0297(19) 0.0154(16) 0.0025(14) -0.0020(12) 0.0021(13)
C31 0.0200(16) 0.0273(19) 0.0169(17) 0.0076(13) 0.0011(13) 0.0072(14)
C32 0.0120(14) 0.0187(16) 0.0184(16) 0.0034(13) -0.0022(12) 0.0008(12)
C33 0.0128(14) 0.0163(16) 0.0199(16) 0.0049(13) -0.0033(12) 0.0004(12)
C34 0.0169(12) 0.0199(13) 0.0177(13) 0.0076(19) -0.0023(19) 0.0030(10)
C35 0.0160(13) 0.0169(15) 0.021(2) 0.0028(12) -0.0011(11) 0.0000(12)
C36 0.0255(18) 0.0233(19) 0.0211(18) 0.0047(14) 0.0033(14) 0.0056(14)
C37 0.0246(17) 0.0231(18) 0.0244(18) -0.0021(15) 0.0033(14) 0.0025(14)
C38 0.0219(17) 0.0170(17) 0.030(2) -0.0048(15) -0.0066(15) 0.0071(14)
C39 0.0281(18) 0.0163(16) 0.0243(19) 0.0015(12) -0.0094(13) 0.0061(13)
C40 0.0175(15) 0.0160(16) 0.0205(17) 0.0015(13) -0.0051(13) 0.0003(12)
C41 0.0277(18) 0.0177(16) 0.0198(17) 0.0040(13) -0.0075(14) 0.0016(14)
C42 0.0189(15) 0.0211(17) 0.0142(15) 0.0028(13) -0.0025(12) -0.0006(13)
C43 0.0155(14) 0.0186(16) 0.0186(15) 0.0005(12) -0.0062(11) -0.0015(12)
C44 0.0252(17) 0.0190(17) 0.0257(17) 0.0041(14) -0.0027(13) -0.0066(14)
C45 0.0262(18) 0.0162(17) 0.036(2) 0.0011(14) -0.0086(15) -0.0021(14)
C46 0.0198(16) 0.0230(18) 0.0267(19) -0.0052(15) -0.0074(14) 0.0030(14)
C47 0.0171(15) 0.0221(17) 0.0213(17) 0.0006(14) -0.0050(13) -0.0006(13)
C48 0.033(2) 0.026(2) 0.040(2) -0.0113(18) -0.0015(18) 0.0062(16)
C49 0.0162(15) 0.0210(17) 0.0158(15) 0.0027(13) -0.0033(12) -0.0021(12)
C50 0.0247(18) 0.028(2) 0.0242(19) 0.0063(15) -0.0009(15) -0.0062(15)
C51 0.0205(18) 0.042(2) 0.0240(19) 0.0029(17) 0.0061(15) -0.0047(16)
C52 0.0171(16) 0.035(2) 0.0219(18) -0.0040(15) 0.0038(13) -0.0004(14)
C53 0.0159(16) 0.0250(19) 0.0247(18) 0.0021(15) 0.0022(13) -0.0005(13)
C54 0.027(2) 0.051(3) 0.042(3) -0.015(2) 0.0170(18) -0.0019(19)
 
_geom_special_details
;
 All esds (except the esd in the dihedral angle between two l.s. planes)
 are estimated using the full covariance matrix.  The cell esds are taken
 into account individually in the estimation of esds in distances, angles
 and torsion angles; correlations between esds in cell parameters are only
 used when they are defined by crystal symmetry.  An approximate (isotropic)
 treatment of cell esds is used for estimating esds involving l.s. planes.
;
 
loop_
 _geom_bond_atom_site_label_1
 _geom_bond_atom_site_label_2
 _geom_bond_distance
 _geom_bond_site_symmetry_2
 _geom_bond_publ_flag
Pr1 O2 2.392(2) . ?
Pr1 O6 2.410(2) . ?
Pr1 O4 2.416(2) . ?
Pr1 O3 2.425(2) . ?
Pr1 O5 2.426(2) . ?
Pr1 O1 2.436(2) . ?
Pr1 N1 2.630(3) . ?
Pr1 N2 2.632(3) . ?
N1 C47 1.331(4) . ?
N1 C43 1.354(4) . ?
C1 F1 1.326(4) . ?
C1 F2 1.332(4) . ?
C1 F3 1.344(4) . ?
C1 C2 1.536(4) . ?
O1 C2 1.250(4) . ?
N2 C53 1.342(4) . ?
N2 C49 1.345(4) . ?
C2 C3 1.388(4) . ?
O2 C4 1.260(4) . ?
O3 C16 1.274(4) . ?
C3 C4 1.418(4) . ?
C3 H3 0.9500 . ?
O4 C18 1.255(4) . ?
C4 C5 1.485(4) . ?
F4 C15 1.327(4) . ?
O5 C30 1.264(4) . ?
F5 C15 1.323(4) . ?
C5 C6 1.385(4) . ?
C5 C14 1.419(4) . ?
O6 C32 1.267(4) . ?
C6 C7 1.410(4) . ?
C6 H6 0.9500 . ?
F6 C15 1.345(5) . ?
F9 C29 1.300(5) . ?
C9 C8 1.370(5) . ?
C9 C10 1.412(5) . ?
C9 H9 0.9500 . ?
F8 C29 1.334(4) . ?
C8 C7 1.417(5) . ?
C8 H8 0.9500 . ?
F7 C29 1.335(5) . ?
C7 C12 1.422(4) . ?
C11 C10 1.365(5) . ?
C11 C12 1.423(5) . ?
C11 H11 0.9500 . ?
C10 H10 0.9500 . ?
C12 C13 1.415(5) . ?
C13 C14 1.370(4) . ?
C13 H13 0.9500 . ?
C15 C16 1.535(5) . ?
C14 H14 0.9500 . ?
C16 C17 1.370(5) . ?
C17 C18 1.431(5) . ?
C17 H17 0.9500 . ?
C19 C20 1.375(5) . ?
C19 C28 1.417(4) . ?
C19 C18 1.495(4) . ?
C20 C21 1.416(5) . ?
C20 H20 0.9500 . ?
C21 C22 1.420(5) . ?
C21 C26 1.422(5) . ?
C22 C23 1.367(5) . ?
C22 H22 0.9500 . ?
C23 C24 1.411(5) . ?
C23 H23 0.9500 . ?
C24 C25 1.364(5) . ?
C24 H24 0.9500 . ?
C25 C26 1.420(5) . ?
C25 H25 0.9500 . ?
C26 C27 1.411(5) . ?
C27 C28 1.361(5) . ?
C27 H27 0.9500 . ?
C28 H28 0.9500 . ?
C29 C30 1.536(5) . ?
C30 C31 1.385(5) . ?
C31 C32 1.421(5) . ?
C31 H31 0.9500 . ?
C32 C33 1.491(4) . ?
C33 C34 1.375(6) . ?
C33 C42 1.426(4) . ?
C34 C35 1.410(4) . ?
C34 H34 0.9500 . ?
C35 C40 1.421(4) . ?
C35 C36 1.422(4) . ?
C36 C37 1.373(5) . ?
C36 H36 0.9500 . ?
C37 C38 1.406(5) . ?
C37 H37 0.9500 . ?
C38 C39 1.358(5) . ?
C38 H38 0.9500 . ?
C39 C40 1.418(5) . ?
C39 H39 0.9500 . ?
C40 C41 1.423(5) . ?
C41 C42 1.362(5) . ?
C41 H41 0.9500 . ?
C42 H42 0.9500 . ?
C43 C44 1.396(5) . ?
C43 C49 1.491(5) . ?
C44 C45 1.371(5) . ?
C44 H44 0.9500 . ?
C45 C46 1.389(5) . ?
C45 H45 0.9500 . ?
C46 C47 1.393(5) . ?
C46 C48 1.507(5) . ?
C47 H47 0.9500 . ?
C48 H48A 0.9800 . ?
C48 H48B 0.9800 . ?
C48 H48C 0.9800 . ?
C49 C50 1.392(5) . ?
C50 C51 1.379(6) . ?
C50 H50 0.9500 . ?
C51 C52 1.383(6) . ?
C51 H51 0.9500 . ?
C52 C53 1.394(5) . ?
C52 C54 1.508(5) . ?
C53 H53 0.9500 . ?
C54 H54A 0.9800 . ?
C54 H54B 0.9800 . ?
C54 H54C 0.9800 . ?
 
loop_
 _geom_angle_atom_site_label_1
 _geom_angle_atom_site_label_2
 _geom_angle_atom_site_label_3
 _geom_angle
 _geom_angle_site_symmetry_1
 _geom_angle_site_symmetry_3
 _geom_angle_publ_flag
O2 Pr1 O6 139.90(8) . . ?
O2 Pr1 O4 76.49(8) . . ?
O6 Pr1 O4 79.20(8) . . ?
O2 Pr1 O3 120.94(8) . . ?
O6 Pr1 O3 78.52(8) . . ?
O4 Pr1 O3 70.00(7) . . ?
O2 Pr1 O5 74.59(7) . . ?
O6 Pr1 O5 69.60(8) . . ?
O4 Pr1 O5 78.45(8) . . ?
O3 Pr1 O5 138.58(8) . . ?
O2 Pr1 O1 68.88(7) . . ?
O6 Pr1 O1 151.19(7) . . ?
O4 Pr1 O1 117.75(8) . . ?
O3 Pr1 O1 85.66(8) . . ?
O5 Pr1 O1 133.79(7) . . ?
O2 Pr1 N1 85.04(8) . . ?
O6 Pr1 N1 103.99(8) . . ?
O4 Pr1 N1 152.97(8) . . ?
O3 Pr1 N1 137.02(8) . . ?
O5 Pr1 N1 77.71(8) . . ?
O1 Pr1 N1 71.96(8) . . ?
O2 Pr1 N2 138.57(8) . . ?
O6 Pr1 N2 76.06(8) . . ?
O4 Pr1 N2 142.66(8) . . ?
O3 Pr1 N2 77.93(8) . . ?
O5 Pr1 N2 117.31(8) . . ?
O1 Pr1 N2 77.18(8) . . ?
N1 Pr1 N2 61.81(9) . . ?
C47 N1 C43 118.4(3) . . ?
C47 N1 Pr1 118.8(2) . . ?
C43 N1 Pr1 119.3(2) . . ?
F1 C1 F2 106.8(3) . . ?
F1 C1 F3 107.1(3) . . ?
F2 C1 F3 106.3(3) . . ?
F1 C1 C2 111.7(3) . . ?
F2 C1 C2 111.3(3) . . ?
F3 C1 C2 113.3(3) . . ?
C2 O1 Pr1 133.5(2) . . ?
C53 N2 C49 118.4(3) . . ?
C53 N2 Pr1 120.2(2) . . ?
C49 N2 Pr1 121.4(2) . . ?
O1 C2 C3 129.1(3) . . ?
O1 C2 C1 114.4(3) . . ?
C3 C2 C1 116.4(3) . . ?
C4 O2 Pr1 142.0(2) . . ?
C16 O3 Pr1 132.4(2) . . ?
C2 C3 C4 121.4(3) . . ?
C2 C3 H3 119.3 . . ?
C4 C3 H3 119.3 . . ?
C18 O4 Pr1 139.7(2) . . ?
O2 C4 C3 121.8(3) . . ?
O2 C4 C5 116.8(3) . . ?
C3 C4 C5 121.4(3) . . ?
C30 O5 Pr1 126.8(2) . . ?
C6 C5 C14 119.3(3) . . ?
C6 C5 C4 117.3(3) . . ?
C14 C5 C4 123.1(3) . . ?
C32 O6 Pr1 132.9(2) . . ?
C5 C6 C7 121.4(3) . . ?
C5 C6 H6 119.3 . . ?
C7 C6 H6 119.3 . . ?
C8 C9 C10 120.1(3) . . ?
C8 C9 H9 119.9 . . ?
C10 C9 H9 119.9 . . ?
C9 C8 C7 120.5(3) . . ?
C9 C8 H8 119.7 . . ?
C7 C8 H8 119.7 . . ?
C6 C7 C8 121.8(3) . . ?
C6 C7 C12 118.7(3) . . ?
C8 C7 C12 119.4(3) . . ?
C10 C11 C12 120.5(3) . . ?
C10 C11 H11 119.7 . . ?
C12 C11 H11 119.7 . . ?
C11 C10 C9 120.8(3) . . ?
C11 C10 H10 119.6 . . ?
C9 C10 H10 119.6 . . ?
C13 C12 C7 119.1(3) . . ?
C13 C12 C11 122.3(3) . . ?
C7 C12 C11 118.6(3) . . ?
C14 C13 C12 121.1(3) . . ?
C14 C13 H13 119.5 . . ?
C12 C13 H13 119.5 . . ?
F5 C15 F4 107.8(3) . . ?
F5 C15 F6 106.0(3) . . ?
F4 C15 F6 106.5(3) . . ?
F5 C15 C16 114.3(3) . . ?
F4 C15 C16 110.7(3) . . ?
F6 C15 C16 111.1(3) . . ?
C13 C14 C5 120.3(3) . . ?
C13 C14 H14 119.8 . . ?
C5 C14 H14 119.8 . . ?
O3 C16 C17 129.8(3) . . ?
O3 C16 C15 112.9(3) . . ?
C17 C16 C15 117.3(3) . . ?
C16 C17 C18 121.9(3) . . ?
C16 C17 H17 119.0 . . ?
C18 C17 H17 119.0 . . ?
C20 C19 C28 119.2(3) . . ?
C20 C19 C18 118.0(3) . . ?
C28 C19 C18 122.7(3) . . ?
O4 C18 C17 122.7(3) . . ?
O4 C18 C19 117.2(3) . . ?
C17 C18 C19 120.1(3) . . ?
C19 C20 C21 121.3(3) . . ?
C19 C20 H20 119.3 . . ?
C21 C20 H20 119.3 . . ?
C20 C21 C22 121.9(3) . . ?
C20 C21 C26 118.7(3) . . ?
C22 C21 C26 119.3(3) . . ?
C23 C22 C21 120.4(3) . . ?
C23 C22 H22 119.8 . . ?
C21 C22 H22 119.8 . . ?
C22 C23 C24 120.3(3) . . ?
C22 C23 H23 119.9 . . ?
C24 C23 H23 119.9 . . ?
C25 C24 C23 120.7(3) . . ?
C25 C24 H24 119.7 . . ?
C23 C24 H24 119.7 . . ?
C24 C25 C26 120.7(3) . . ?
C24 C25 H25 119.7 . . ?
C26 C25 H25 119.7 . . ?
C27 C26 C25 122.6(3) . . ?
C27 C26 C21 118.7(3) . . ?
C25 C26 C21 118.6(3) . . ?
C28 C27 C26 121.4(3) . . ?
C28 C27 H27 119.3 . . ?
C26 C27 H27 119.3 . . ?
C27 C28 C19 120.5(3) . . ?
C27 C28 H28 119.7 . . ?
C19 C28 H28 119.7 . . ?
F9 C29 F8 107.0(3) . . ?
F9 C29 F7 107.2(4) . . ?
F8 C29 F7 105.0(3) . . ?
F9 C29 C30 115.3(3) . . ?
F8 C29 C30 110.5(3) . . ?
F7 C29 C30 111.2(3) . . ?
O5 C30 C31 129.1(3) . . ?
O5 C30 C29 112.5(3) . . ?
C31 C30 C29 118.4(3) . . ?
C30 C31 C32 122.4(3) . . ?
C30 C31 H31 118.8 . . ?
C32 C31 H31 118.8 . . ?
O6 C32 C31 122.1(3) . . ?
O6 C32 C33 116.8(3) . . ?
C31 C32 C33 121.1(3) . . ?
C34 C33 C42 118.8(3) . . ?
C34 C33 C32 118.3(3) . . ?
C42 C33 C32 122.9(3) . . ?
C33 C34 C35 121.9(3) . . ?
C33 C34 H34 119.1 . . ?
C35 C34 H34 119.1 . . ?
C34 C35 C40 119.0(3) . . ?
C34 C35 C36 122.3(3) . . ?
C40 C35 C36 118.7(3) . . ?
C37 C36 C35 120.5(3) . . ?
C37 C36 H36 119.7 . . ?
C35 C36 H36 119.7 . . ?
C36 C37 C38 120.4(3) . . ?
C36 C37 H37 119.8 . . ?
C38 C37 H37 119.8 . . ?
C39 C38 C37 120.4(3) . . ?
C39 C38 H38 119.8 . . ?
C37 C38 H38 119.8 . . ?
C38 C39 C40 121.1(3) . . ?
C38 C39 H39 119.4 . . ?
C40 C39 H39 119.4 . . ?
C39 C40 C35 118.8(3) . . ?
C39 C40 C41 122.6(3) . . ?
C35 C40 C41 118.5(3) . . ?
C42 C41 C40 121.1(3) . . ?
C42 C41 H41 119.4 . . ?
C40 C41 H41 119.4 . . ?
C41 C42 C33 120.7(3) . . ?
C41 C42 H42 119.7 . . ?
C33 C42 H42 119.7 . . ?
N1 C43 C44 121.0(3) . . ?
N1 C43 C49 116.1(3) . . ?
C44 C43 C49 122.9(3) . . ?
C45 C44 C43 119.1(3) . . ?
C45 C44 H44 120.5 . . ?
C43 C44 H44 120.5 . . ?
C44 C45 C46 120.7(3) . . ?
C44 C45 H45 119.7 . . ?
C46 C45 H45 119.7 . . ?
C45 C46 C47 116.3(3) . . ?
C45 C46 C48 123.1(3) . . ?
C47 C46 C48 120.6(3) . . ?
N1 C47 C46 124.2(3) . . ?
N1 C47 H47 117.9 . . ?
C46 C47 H47 117.9 . . ?
C46 C48 H48A 109.5 . . ?
C46 C48 H48B 109.5 . . ?
H48A C48 H48B 109.5 . . ?
C46 C48 H48C 109.5 . . ?
H48A C48 H48C 109.5 . . ?
H48B C48 H48C 109.5 . . ?
N2 C49 C50 121.1(3) . . ?
N2 C49 C43 116.3(3) . . ?
C50 C49 C43 122.5(3) . . ?
C51 C50 C49 119.5(4) . . ?
C51 C50 H50 120.3 . . ?
C49 C50 H50 120.3 . . ?
C50 C51 C52 120.4(3) . . ?
C50 C51 H51 119.8 . . ?
C52 C51 H51 119.8 . . ?
C51 C52 C53 116.5(3) . . ?
C51 C52 C54 123.3(3) . . ?
C53 C52 C54 120.2(4) . . ?
N2 C53 C52 124.1(3) . . ?
N2 C53 H53 117.9 . . ?
C52 C53 H53 117.9 . . ?
C52 C54 H54A 109.5 . . ?
C52 C54 H54B 109.5 . . ?
H54A C54 H54B 109.5 . . ?
C52 C54 H54C 109.5 . . ?
H54A C54 H54C 109.5 . . ?
H54B C54 H54C 109.5 . . ?
 
loop_
 _geom_torsion_atom_site_label_1
 _geom_torsion_atom_site_label_2
 _geom_torsion_atom_site_label_3
 _geom_torsion_atom_site_label_4
 _geom_torsion
 _geom_torsion_site_symmetry_1
 _geom_torsion_site_symmetry_2
 _geom_torsion_site_symmetry_3
 _geom_torsion_site_symmetry_4
 _geom_torsion_publ_flag
Pr1 O1 C2 C3 22.3(5) . . . . ?
Pr1 O1 C2 C1 -159.4(2) . . . . ?
F1 C1 C2 O1 39.0(4) . . . . ?
F2 C1 C2 O1 -80.2(4) . . . . ?
F3 C1 C2 O1 160.1(3) . . . . ?
F1 C1 C2 C3 -142.5(3) . . . . ?
F2 C1 C2 C3 98.3(3) . . . . ?
F3 C1 C2 C3 -21.4(4) . . . . ?
O1 C2 C3 C4 -3.2(6) . . . . ?
C1 C2 C3 C4 178.5(3) . . . . ?
Pr1 O2 C4 C3 2.2(5) . . . . ?
Pr1 O2 C4 C5 -177.1(2) . . . . ?
C2 C3 C4 O2 -9.0(5) . . . . ?
C2 C3 C4 C5 170.2(3) . . . . ?
O2 C4 C5 C6 -11.4(4) . . . . ?
C3 C4 C5 C6 169.4(3) . . . . ?
O2 C4 C5 C14 162.3(3) . . . . ?
C3 C4 C5 C14 -16.9(5) . . . . ?
C14 C5 C6 C7 -2.8(5) . . . . ?
C4 C5 C6 C7 171.1(3) . . . . ?
C10 C9 C8 C7 0.8(5) . . . . ?
C5 C6 C7 C8 -175.8(3) . . . . ?
C5 C6 C7 C12 1.5(5) . . . . ?
C9 C8 C7 C6 176.4(3) . . . . ?
C9 C8 C7 C12 -0.9(5) . . . . ?
C12 C11 C10 C9 -0.7(5) . . . . ?
C8 C9 C10 C11 0.0(6) . . . . ?
C6 C7 C12 C13 1.3(5) . . . . ?
C8 C7 C12 C13 178.7(3) . . . . ?
C6 C7 C12 C11 -177.2(3) . . . . ?
C8 C7 C12 C11 0.2(5) . . . . ?
C10 C11 C12 C13 -177.9(3) . . . . ?
C10 C11 C12 C7 0.6(5) . . . . ?
C7 C12 C13 C14 -2.9(5) . . . . ?
C11 C12 C13 C14 175.6(3) . . . . ?
C12 C13 C14 C5 1.6(5) . . . . ?
C6 C5 C14 C13 1.3(5) . . . . ?
C4 C5 C14 C13 -172.3(3) . . . . ?
Pr1 O3 C16 C17 -20.9(5) . . . . ?
Pr1 O3 C16 C15 158.9(2) . . . . ?
F5 C15 C16 O3 173.3(3) . . . . ?
F4 C15 C16 O3 -64.7(4) . . . . ?
F6 C15 C16 O3 53.4(4) . . . . ?
F5 C15 C16 C17 -6.9(5) . . . . ?
F4 C15 C16 C17 115.1(4) . . . . ?
F6 C15 C16 C17 -126.8(3) . . . . ?
O3 C16 C17 C18 1.7(6) . . . . ?
C15 C16 C17 C18 -178.1(3) . . . . ?
Pr1 O4 C18 C17 3.2(5) . . . . ?
Pr1 O4 C18 C19 -176.9(2) . . . . ?
C16 C17 C18 O4 7.5(5) . . . . ?
C16 C17 C18 C19 -172.3(3) . . . . ?
C20 C19 C18 O4 13.2(4) . . . . ?
C28 C19 C18 O4 -164.4(3) . . . . ?
C20 C19 C18 C17 -166.9(3) . . . . ?
C28 C19 C18 C17 15.5(5) . . . . ?
C28 C19 C20 C21 0.8(5) . . . . ?
C18 C19 C20 C21 -176.8(3) . . . . ?
C19 C20 C21 C22 177.2(3) . . . . ?
C19 C20 C21 C26 0.5(5) . . . . ?
C20 C21 C22 C23 -174.4(3) . . . . ?
C26 C21 C22 C23 2.3(5) . . . . ?
C21 C22 C23 C24 -1.3(5) . . . . ?
C22 C23 C24 C25 -1.0(5) . . . . ?
C23 C24 C25 C26 2.2(5) . . . . ?
C24 C25 C26 C27 176.3(3) . . . . ?
C24 C25 C26 C21 -1.2(5) . . . . ?
C20 C21 C26 C27 -1.8(5) . . . . ?
C22 C21 C26 C27 -178.6(3) . . . . ?
C20 C21 C26 C25 175.7(3) . . . . ?
C22 C21 C26 C25 -1.0(5) . . . . ?
C25 C26 C27 C28 -175.7(3) . . . . ?
C21 C26 C27 C28 1.8(5) . . . . ?
C26 C27 C28 C19 -0.4(6) . . . . ?
C20 C19 C28 C27 -0.9(5) . . . . ?
C18 C19 C28 C27 176.7(3) . . . . ?
Pr1 O5 C30 C31 -32.3(5) . . . . ?
Pr1 O5 C30 C29 148.4(2) . . . . ?
F9 C29 C30 O5 179.3(4) . . . . ?
F8 C29 C30 O5 -59.2(4) . . . . ?
F7 C29 C30 O5 57.0(4) . . . . ?
F9 C29 C30 C31 0.0(5) . . . . ?
F8 C29 C30 C31 121.4(4) . . . . ?
F7 C29 C30 C31 -122.4(4) . . . . ?
O5 C30 C31 C32 -0.4(6) . . . . ?
C29 C30 C31 C32 178.9(3) . . . . ?
Pr1 O6 C32 C31 30.1(5) . . . . ?
Pr1 O6 C32 C33 -149.8(2) . . . . ?
C30 C31 C32 O6 3.0(5) . . . . ?
C30 C31 C32 C33 -177.1(3) . . . . ?
O6 C32 C33 C34 4.0(4) . . . . ?
C31 C32 C33 C34 -175.8(3) . . . . ?
O6 C32 C33 C42 -176.4(3) . . . . ?
C31 C32 C33 C42 3.7(5) . . . . ?
C42 C33 C34 C35 1.2(5) . . . . ?
C32 C33 C34 C35 -179.2(3) . . . . ?
C33 C34 C35 C40 0.3(5) . . . . ?
C33 C34 C35 C36 -179.8(3) . . . . ?
C34 C35 C36 C37 -178.9(3) . . . . ?
C40 C35 C36 C37 1.0(5) . . . . ?
C35 C36 C37 C38 -0.2(5) . . . . ?
C36 C37 C38 C39 -0.4(6) . . . . ?
C37 C38 C39 C40 0.1(5) . . . . ?
C38 C39 C40 C35 0.7(5) . . . . ?
C38 C39 C40 C41 -179.4(3) . . . . ?
C34 C35 C40 C39 178.7(3) . . . . ?
C36 C35 C40 C39 -1.2(5) . . . . ?
C34 C35 C40 C41 -1.3(5) . . . . ?
C36 C35 C40 C41 178.8(3) . . . . ?
C39 C40 C41 C42 -179.1(3) . . . . ?
C35 C40 C41 C42 0.8(5) . . . . ?
C40 C41 C42 C33 0.7(5) . . . . ?
C34 C33 C42 C41 -1.7(5) . . . . ?
C32 C33 C42 C41 178.7(3) . . . . ?
C47 N1 C43 C44 3.9(4) . . . . ?
Pr1 N1 C43 C44 -154.9(2) . . . . ?
C47 N1 C43 C49 -174.8(3) . . . . ?
Pr1 N1 C43 C49 26.3(3) . . . . ?
N1 C43 C44 C45 -3.0(5) . . . . ?
C49 C43 C44 C45 175.7(3) . . . . ?
C43 C44 C45 C46 -1.4(5) . . . . ?
C44 C45 C46 C47 4.6(5) . . . . ?
C44 C45 C46 C48 -174.4(3) . . . . ?
C43 N1 C47 C46 -0.4(5) . . . . ?
Pr1 N1 C47 C46 158.5(3) . . . . ?
C45 C46 C47 N1 -3.8(5) . . . . ?
C48 C46 C47 N1 175.2(3) . . . . ?
C53 N2 C49 C50 1.1(5) . . . . ?
Pr1 N2 C49 C50 179.5(2) . . . . ?
C53 N2 C49 C43 179.1(3) . . . . ?
Pr1 N2 C49 C43 -2.5(4) . . . . ?
N1 C43 C49 N2 -15.6(4) . . . . ?
C44 C43 C49 N2 165.6(3) . . . . ?
N1 C43 C49 C50 162.3(3) . . . . ?
C44 C43 C49 C50 -16.4(5) . . . . ?
N2 C49 C50 C51 -0.8(5) . . . . ?
C43 C49 C50 C51 -178.7(3) . . . . ?
C49 C50 C51 C52 -0.3(6) . . . . ?
C50 C51 C52 C53 1.0(6) . . . . ?
C50 C51 C52 C54 -179.9(4) . . . . ?
C49 N2 C53 C52 -0.3(5) . . . . ?
Pr1 N2 C53 C52 -178.7(3) . . . . ?
C51 C52 C53 N2 -0.8(5) . . . . ?
C54 C52 C53 N2 -179.9(4) . . . . ?
 
_refine_diff_density_max    0.967
_refine_diff_density_min   -0.784
_refine_diff_density_rms    0.067

_shelx_res_file
;
TITL RF1690  [PrL3(5,5'-Me2bipy)]  in Pca2(1)
    rf1690.res
    created by SHELXL-2016/6 at 14:50:07 on 14-Jul-2020
CELL  0.71073  20.1848  11.9034  19.6102   90.000   90.000   90.000
ZERR    4.000   0.0006   0.0003   0.0006    0.000    0.000    0.000
LATT -1
SYMM -X, -Y, 1/2+Z
SYMM 1/2+X, -Y, Z
SYMM 1/2-X, Y, 1/2+Z
SFAC C H F N O Pr
UNIT 216 144 36 8 24 4
OMIT 1 1 0
OMIT 0 1 0

L.S. 20
BOND $H
OMIT -3 60
ACTA 60
CONF
HTAB
LIST 6
FMAP 2
PLAN 12

ISOR 0.002 F9

TEMP -173.130
SIZE 0.25 0.18 0.13

WGHT    0.015500    2.444900
FVAR       0.29021
PR1   6    0.551411    0.150888    0.532766    11.00000    0.01049    0.01197 =
         0.01134    0.00067    0.00034    0.00073
N1    4    0.503909   -0.050876    0.508252    11.00000    0.01481    0.01769 =
         0.01962   -0.00109   -0.00429   -0.00226
C1    1    0.644815   -0.142455    0.664219    11.00000    0.02597    0.01975 =
         0.01555    0.00275    0.00164    0.00305
F1    3    0.583686   -0.167707    0.683616    11.00000    0.02870    0.05188 =
         0.05241    0.03207    0.00410   -0.00547
O1    5    0.602586    0.020483    0.612717    11.00000    0.01819    0.02034 =
         0.01426    0.00257    0.00050    0.00518
F2    3    0.676304   -0.104447    0.719269    11.00000    0.04874    0.02839 =
         0.01524    0.00082   -0.00789    0.00627
N2    4    0.450064    0.081026    0.605776    11.00000    0.01395    0.01881 =
         0.01920    0.00216    0.00103    0.00001
C2    1    0.645194   -0.055011    0.606602    11.00000    0.01952    0.01633 =
         0.01203    0.00117   -0.00281   -0.00122
O2    5    0.652985    0.077778    0.488253    11.00000    0.01485    0.01828 =
         0.01813    0.00381    0.00274    0.00519
O3    5    0.551358    0.283132    0.626827    11.00000    0.01891    0.01922 =
         0.01313   -0.00115    0.00053   -0.00088
F3    3    0.674688   -0.239362    0.647097    11.00000    0.07152    0.01852 =
         0.01881    0.00397    0.00868    0.01487
C3    1    0.693064   -0.068640    0.556439    11.00000    0.01802    0.01805 =
         0.01791    0.00085    0.00134    0.00593
AFIX  43
H3    2    0.723742   -0.128877    0.560016    11.00000   -1.20000
AFIX   0
O4    5    0.612964    0.317401    0.501952    11.00000    0.01719    0.01626 =
         0.01828   -0.00356    0.00323   -0.00374
C4    1    0.697125    0.005467    0.499979    11.00000    0.01327    0.01209 =
         0.01723   -0.00209   -0.00011   -0.00111
F4    3    0.466706    0.436135    0.693077    11.00000    0.02084    0.06426 =
         0.04395   -0.02654    0.00998   -0.00111
O5    5    0.538291    0.152806    0.409791    11.00000    0.01925    0.01987 =
         0.01226    0.00002   -0.00040    0.00175
F5    3    0.548356    0.550044    0.702034    11.00000    0.05379    0.02968 =
         0.04749   -0.02177    0.02548   -0.00939
C5    1    0.754258    0.002288    0.452302    11.00000    0.01506    0.00983 =
         0.01629   -0.00243   -0.00085    0.00027
O6    5    0.462608    0.275279    0.500429    11.00000    0.01573    0.01877 =
         0.01498    0.00396    0.00088    0.00423
C6    1    0.748990    0.063781    0.392619    11.00000    0.01229    0.01642 =
         0.01619   -0.00230   -0.00034    0.00063
AFIX  43
H6    2    0.707628    0.096621    0.380917    11.00000   -1.20000
AFIX   0
F6    3    0.552581    0.390100    0.750707    11.00000    0.06711    0.05464 =
         0.01772   -0.01075    0.00237    0.01480
F9    3    0.544028    0.312237    0.261050    11.00000    0.10047    0.10765 =
         0.03984    0.04478    0.04046    0.07884
C9    1    0.854926    0.165347    0.250403    11.00000    0.02690    0.02871 =
         0.01611    0.00041    0.00397   -0.00461
AFIX  43
H9    2    0.852110    0.212381    0.211373    11.00000   -1.20000
AFIX   0
F8    3    0.622034    0.219535    0.306267    11.00000    0.01861    0.05666 =
         0.02466   -0.00038    0.00531    0.00330
C8    1    0.799979    0.147505    0.289971    11.00000    0.02039    0.01940 =
         0.01787   -0.00099    0.00045   -0.00109
AFIX  43
H8    2    0.759065    0.181523    0.277850    11.00000   -1.20000
AFIX   0
F7    3    0.536820    0.135008    0.269755    11.00000    0.05578    0.12462 =
         0.02888   -0.03911    0.01705   -0.04064
C7    1    0.803684    0.078711    0.348839    11.00000    0.01615    0.01468 =
         0.01490   -0.00388    0.00058   -0.00172
C11   1    0.920772    0.046125    0.323415    11.00000    0.01284    0.03220 =
         0.02333   -0.00614    0.00230   -0.00137
AFIX  43
H11   2    0.961935    0.011519    0.333923    11.00000   -1.20000
AFIX   0
C10   1    0.915723    0.113942    0.267544    11.00000    0.01971    0.03476 =
         0.02147   -0.00347    0.00639   -0.00549
AFIX  43
H10   2    0.953590    0.126721    0.239839    11.00000   -1.20000
AFIX   0
C12   1    0.864871    0.026825    0.366065    11.00000    0.01265    0.02121 =
         0.01722   -0.00482    0.00052   -0.00273
C13   1    0.868585   -0.039916    0.425659    11.00000    0.01246    0.02099 =
         0.02136   -0.00301   -0.00341    0.00126
AFIX  43
H13   2    0.908754   -0.077623    0.436310    11.00000   -1.20000
AFIX   0
C15   1    0.532302    0.443112    0.693826    11.00000    0.02416    0.02681 =
         0.02032   -0.00744    0.00587   -0.00159
C14   1    0.815178   -0.051020    0.468238    11.00000    0.01654    0.01425 =
         0.01654   -0.00098   -0.00192    0.00026
AFIX  43
H14   2    0.818957   -0.094624    0.508626    11.00000   -1.20000
AFIX   0
C16   1    0.561970    0.388486    0.629821    11.00000    0.01340    0.01976 =
         0.01650   -0.00403   -0.00106    0.00244
C17   1    0.594918    0.457163    0.585146    11.00000    0.01993    0.01658 =
         0.02101   -0.00500    0.00358   -0.00018
AFIX  43
H17   2    0.599449    0.534640    0.595795    11.00000   -1.20000
AFIX   0
C19   1    0.665408    0.489998    0.479983    11.00000    0.01506    0.01319 =
         0.02133    0.00020    0.00126   -0.00137
C18   1    0.622707    0.415594    0.522911    11.00000    0.01221    0.01585 =
         0.01827    0.00107    0.00170    0.00040
C20   1    0.679809    0.455506    0.414714    11.00000    0.01806    0.01418 =
         0.01969   -0.00284   -0.00113   -0.00242
AFIX  43
H20   2    0.660699    0.388047    0.397885    11.00000   -1.20000
AFIX   0
C21   1    0.722555    0.518517    0.372072    11.00000    0.01854    0.01734 =
         0.01793   -0.00013   -0.00206   -0.00065
C22   1    0.740123    0.481390    0.305663    11.00000    0.02689    0.02373 =
         0.01967   -0.00357    0.00061   -0.00592
AFIX  43
H22   2    0.719978    0.415953    0.287247    11.00000   -1.20000
AFIX   0
C23   1    0.785831    0.539214    0.268084    11.00000    0.02660    0.03196 =
         0.01649    0.00439    0.00024   -0.00191
AFIX  43
H23   2    0.797951    0.512930    0.224076    11.00000   -1.20000
AFIX   0
C24   1    0.815107    0.637804    0.294369    11.00000    0.02376    0.02410 =
         0.02494    0.01261    0.00037   -0.00239
AFIX  43
H24   2    0.847340    0.676752    0.268155    11.00000   -1.20000
AFIX   0
C25   1    0.797598    0.677722    0.357005    11.00000    0.02066    0.01555 =
         0.02781    0.00433   -0.00111   -0.00242
AFIX  43
H25   2    0.816593    0.745623    0.373308    11.00000   -1.20000
AFIX   0
C26   1    0.751256    0.618811    0.398104    11.00000    0.01821    0.01302 =
         0.02303    0.00158   -0.00036   -0.00044
C27   1    0.734533    0.653422    0.464710    11.00000    0.02578    0.01541 =
         0.02972   -0.00693    0.00402   -0.00688
AFIX  43
H27   2    0.752463    0.721456    0.482055    11.00000   -1.20000
AFIX   0
C28   1    0.693249    0.591411    0.504666    11.00000    0.02582    0.01835 =
         0.02192   -0.00730    0.00473   -0.00325
AFIX  43
H28   2    0.683024    0.616340    0.549466    11.00000   -1.20000
AFIX   0
C29   1    0.556313    0.228422    0.301626    11.00000    0.02334    0.04387 =
         0.01498    0.00402    0.00172    0.01108
C30   1    0.525202    0.237063    0.372914    11.00000    0.01367    0.02973 =
         0.01535    0.00252   -0.00202    0.00214
C31   1    0.487471    0.330969    0.388181    11.00000    0.02004    0.02729 =
         0.01694    0.00755    0.00108    0.00723
AFIX  43
H31   2    0.482555    0.387800    0.354547    11.00000   -1.20000
AFIX   0
C32   1    0.455861    0.345355    0.452325    11.00000    0.01203    0.01869 =
         0.01843    0.00344   -0.00219    0.00080
C33   1    0.412982    0.444841    0.466038    11.00000    0.01279    0.01631 =
         0.01993    0.00485   -0.00334    0.00040
C34   1    0.387275    0.457739    0.530493    11.00000    0.01687    0.01992 =
         0.01769    0.00759   -0.00229    0.00302
AFIX  43
H34   2    0.397881    0.403900    0.564546    11.00000   -1.20000
AFIX   0
C35   1    0.345619    0.548607    0.547478    11.00000    0.01600    0.01691 =
         0.02107    0.00276   -0.00114    0.00004
C36   1    0.318904    0.562863    0.614013    11.00000    0.02552    0.02334 =
         0.02105    0.00472    0.00327    0.00558
AFIX  43
H36   2    0.329706    0.510642    0.648919    11.00000   -1.20000
AFIX   0
C37   1    0.277607    0.651532    0.628213    11.00000    0.02457    0.02310 =
         0.02444   -0.00215    0.00327    0.00254
AFIX  43
H37   2    0.259948    0.660109    0.672815    11.00000   -1.20000
AFIX   0
C38   1    0.261309    0.729688    0.577136    11.00000    0.02187    0.01698 =
         0.03030   -0.00475   -0.00659    0.00711
AFIX  43
H38   2    0.232493    0.790502    0.587356    11.00000   -1.20000
AFIX   0
C39   1    0.286531    0.718735    0.513263    11.00000    0.02809    0.01630 =
         0.02432    0.00155   -0.00936    0.00615
AFIX  43
H39   2    0.275131    0.772261    0.479299    11.00000   -1.20000
AFIX   0
C40   1    0.329588    0.628780    0.496400    11.00000    0.01750    0.01601 =
         0.02053    0.00148   -0.00513    0.00032
C41   1    0.357420    0.615384    0.430208    11.00000    0.02766    0.01770 =
         0.01979    0.00399   -0.00752    0.00164
AFIX  43
H41   2    0.347567    0.668879    0.395718    11.00000   -1.20000
AFIX   0
C42   1    0.397953    0.527136    0.415477    11.00000    0.01890    0.02107 =
         0.01419    0.00278   -0.00250   -0.00061
AFIX  43
H42   2    0.416388    0.520345    0.371095    11.00000   -1.20000
AFIX   0
C43   1    0.466199   -0.102196    0.556121    11.00000    0.01550    0.01861 =
         0.01861    0.00047   -0.00618   -0.00145
C44   1    0.461301   -0.219124    0.558816    11.00000    0.02515    0.01905 =
         0.02571    0.00406   -0.00275   -0.00665
AFIX  43
H44   2    0.436447   -0.254528    0.593895    11.00000   -1.20000
AFIX   0
C45   1    0.492870   -0.282143    0.510113    11.00000    0.02620    0.01617 =
         0.03630    0.00105   -0.00859   -0.00207
AFIX  43
H45   2    0.490638   -0.361793    0.512131    11.00000   -1.20000
AFIX   0
C46   1    0.528086   -0.230701    0.457849    11.00000    0.01975    0.02302 =
         0.02670   -0.00524   -0.00735    0.00296
C47   1    0.533218   -0.114146    0.461115    11.00000    0.01705    0.02207 =
         0.02128    0.00061   -0.00498   -0.00058
AFIX  43
H47   2    0.559325   -0.077427    0.427530    11.00000   -1.20000
AFIX   0
C48   1    0.558627   -0.294837    0.399549    11.00000    0.03258    0.02621 =
         0.04018   -0.01129   -0.00151    0.00621
AFIX 137
H48A  2    0.533640   -0.279897    0.357673    11.00000   -1.50000
H48B  2    0.557410   -0.375457    0.409600    11.00000   -1.50000
H48C  2    0.604698   -0.270874    0.393454    11.00000   -1.50000
AFIX   0
C49   1    0.429885   -0.026610    0.603849    11.00000    0.01621    0.02101 =
         0.01579    0.00272   -0.00326   -0.00207
C50   1    0.376539   -0.063204    0.642967    11.00000    0.02469    0.02819 =
         0.02422    0.00628   -0.00090   -0.00616
AFIX  43
H50   2    0.362430   -0.139248    0.640662    11.00000   -1.20000
AFIX   0
C51   1    0.344318    0.011798    0.685106    11.00000    0.02052    0.04174 =
         0.02396    0.00295    0.00612   -0.00466
AFIX  43
H51   2    0.307758   -0.012680    0.711752    11.00000   -1.20000
AFIX   0
C52   1    0.364948    0.122468    0.688780    11.00000    0.01710    0.03482 =
         0.02192   -0.00396    0.00376   -0.00043
C53   1    0.418222    0.152449    0.647325    11.00000    0.01588    0.02500 =
         0.02474    0.00207    0.00217   -0.00049
AFIX  43
H53   2    0.432895    0.228252    0.648585    11.00000   -1.20000
AFIX   0
C54   1    0.332267    0.209096    0.733723    11.00000    0.02719    0.05123 =
         0.04194   -0.01504    0.01700   -0.00192
AFIX 137
H54A  2    0.365020    0.265561    0.747366    11.00000   -1.50000
H54B  2    0.314276    0.172388    0.774442    11.00000   -1.50000
H54C  2    0.296271    0.245622    0.708562    11.00000   -1.50000
AFIX   0
HKLF 4


REM  RF1690  [PrL3(5,5'-Me2bipy)]  in Pca2(1)
REM R1 =  0.0266 for   12338 Fo > 4sig(Fo)  and  0.0329 for all   13727 data
REM    651 parameters refined using      7 restraints

END

WGHT      0.0152      2.5662

REM Instructions for potential hydrogen bonds
HTAB C53 O3

REM Highest difference peak  0.967,  deepest hole -0.784,  1-sigma level  0.067
Q1    1   0.5500  0.0805  0.5315  11.00000  0.05    0.97
Q2    1   0.5554  0.2202  0.5345  11.00000  0.05    0.86
Q3    1   0.5732  0.3570  0.2816  11.00000  0.05    0.62
Q4    1   0.5274  0.2069  0.2578  11.00000  0.05    0.61
Q5    1   0.5729  0.3528  0.7856  11.00000  0.05    0.47
Q6    1   0.5297  0.2976  0.2530  11.00000  0.05    0.46
Q7    1   0.5510  0.5398  0.5322  11.00000  0.05    0.42
Q8    1   0.5304  0.1507  0.5709  11.00000  0.05    0.40
Q9    1   0.5756  0.1486  0.5676  11.00000  0.05    0.37
Q10   1   0.5138  0.1056  0.5289  11.00000  0.05    0.37
Q11   1   0.5242  0.1434  0.4993  11.00000  0.05    0.36
Q12   1   0.5663  0.1477  0.4926  11.00000  0.05    0.36
;
_shelx_res_checksum   24727

_shelx_hkl_file
;
   0  -1   0    0.50    0.50
   0   1   0    0.00    0.40
   0  -2   0  792.02   47.20
   0  -2   0  705.03   47.00
   0  -2   0  776.32   48.40
   0   2   0  759.22   45.90
   0   2   0  777.52   48.40
   0   2   0  784.42   47.50
   0   2   0  803.72   47.40
   0  -3   0 2106.89  127.69
   0  -3   0 2065.49  125.49
   0  -3   0 2081.09  125.59
   0   3   0 2157.48  126.39
   0   3   0 2120.09  126.09
   0   3   0 2074.89  127.69
   0   3   0 2048.20  123.89
   0  -4   0 1189.78   73.59
   0  -4   0 1201.98   76.79
   0  -4   0 1146.39   73.39
   0   4   0 1268.07   77.39
   0   4   0 1215.68   71.99
   0  -5   0  201.48   14.60
   0  -5   0  222.88   19.20
   0  -5   0  193.38   14.40
   0   5   0  209.38   13.80
   0  -6   0  654.23   46.30
   0   6   0  618.14   38.90
   0  -7   0 2173.48  141.99
   0   7   0 2239.08  134.39
   0   7   0 2258.57  133.19
   0  -8   0   94.49   17.10
   0   8   0   81.79    7.10
   0   8   0   72.99    9.70
   0  -9   0  295.37   35.40
   0   9   0  350.56   22.10
   0   9   0  317.17   26.00
   0   9   0  347.27   22.00
   0 -10   0 2632.94  168.18
   0  10   0 2555.94  158.08
   0  10   0 2543.45  152.18
   0 -11   0  142.59   25.20
   0  11   0  127.59   16.90
   0 -12   0   22.30   13.90
   0  12   0   -2.50    7.00
   0 -13   0 1773.12  117.79
   0  13   0 1478.95  103.49
   0 -14   0  564.54   55.79
   0 -15   0   18.70   15.80
   0 -16   0  440.06   57.99
   0 -17   0  274.57   47.30
   0 -18   0   41.30   24.20
   0 -19   0   57.19   26.80
   0 -19  -1   -2.90   19.60
   0 -18  -1   -0.40   18.60
   0 -17  -1   -4.80   15.40
   0 -16  -1   -5.60   13.60
   0 -15  -1  -13.10    9.50
   0 -14  -1    1.10   12.50
   0  13   1   -0.80    7.50
   0 -13  -1    3.10   11.90
   0  12   1   -7.20    6.70
   0 -12  -1    1.60   10.80
   0  11   1    0.70    6.10
   0 -11  -1    1.50    9.10
   0  10   1   -5.60    5.30
   0  10   1   -1.40    2.00
   0 -10  -1    7.80    7.40
   0   9   1    0.10    4.90
   0   9   1    2.30    2.20
   0  -9  -1    4.30    7.20
   0   8   1   -5.30    4.10
   0   8   1   -1.40    2.10
   0  -8  -1    2.10    6.00
   0   7   1   -1.10    1.80
   0   7   1   -2.30    3.40
   0  -7  -1    1.80    3.30
   0  -7  -1    3.00    3.10
   0  -7  -1    6.70    6.20
   0   6   1   -1.10    3.00
   0   6   1    0.20    1.70
   0  -6  -1    0.40    3.40
   0  -6  -1    5.00    4.50
   0  -6  -1   -3.10    3.10
   0   5   1    0.10    2.60
   0   5   1   -0.30    1.40
   0  -5  -1   -1.60    3.40
   0  -5  -1   -2.50    3.60
   0  -5  -1   -1.20    2.40
   0   4   1    2.00    1.50
   0   4   1    2.90    4.20
   0   4   1   -0.90    2.10
   0  -4  -1    1.70    3.60
   0  -4  -1    4.10    3.50
   0  -4  -1    2.80    4.10
   0   3   1    2.10    2.40
   0   3   1    0.10    2.40
   0   3   1    3.30    3.90
   0   3   1    0.40    1.10
   0   3   1    2.20    4.50
   0  -3  -1    1.80    2.30
   0  -3  -1    1.50    4.20
   0  -3  -1   -2.40    3.60
   0   2   1    1.20    2.70
   0   2   1    1.90    2.20
   0   2   1   -1.50    2.60
   0   2   1    2.60    1.90
   0  -2  -1   -0.20    2.80
   0  -2  -1    2.50    1.90
   0  -2  -1    2.90    3.10
   0   1   1    0.60    0.50
   0   1   1    0.20    1.00
   0   1   1   -0.50    1.20
   0   1   1    0.50    0.80
   0  -1  -1    0.00    0.50
   0  -1  -1   -0.30    0.70
   0  -1  -1    1.30    1.20
   0   0   1    0.10    0.30
   0   0   1   -0.50    0.40
   0   0   1   -0.10    0.10
   0   0   1   -0.10    0.10
   0   0   1   -0.10    0.10
   0   0   1    0.30    0.40
   0   0   1    0.00    0.20
   0   0   1   -0.10    0.40
   0   0  -1    0.10    0.20
   0   0  -1    0.20    0.30
   0   0  -1   -0.10    0.10
   0   0  -1   -0.10    0.30
   0   0  -1    0.00    0.10
   0   0  -1    0.00    0.10
   0   0  -1   -0.10    0.50
   0   0  -1   -0.10    0.60
   0  -1   1    0.10    0.30
   0  -1   1    0.00    0.50
   0  -1   1   -0.50    0.60
   0  -1   1   -0.30    0.70
   0   1  -1   -0.40    0.50
   0   1  -1   -0.30    0.70
   0   1  -1   -0.10    0.30
   0   1  -1    0.20    0.70
   0  -2   1    0.10    0.50
   0  -2   1   -0.80    1.60
   0  -2   1    4.20    1.80
   0  -2   1    0.20    1.40
   0   2  -1    2.80    2.00
   0   2  -1   -0.20    1.30
   0   2  -1    1.30    0.70
   0   2  -1    0.50    2.00
   0  -3   1    0.20    2.30
   0   3  -1    2.40    2.70
   0   3  -1    2.50    2.60
   0   3  -1    0.90    0.70
   0  -4   1    0.80    2.50
   0   4  -1    1.00    2.30
   0   4  -1    0.80    0.90
   0  -5   1    1.30    3.20
   0   5  -1    0.50    0.90
   0  -6   1    4.10    4.60
   0   6  -1    0.60    1.30
   0  -7   1    2.90    5.70
   0   7  -1   -2.60    1.30
   0  -8   1    5.60    6.90
   0   8  -1    1.80    1.40
   0  -9   1    0.60    6.30
   0   9  -1    0.20    1.10
   0   9  -1   -0.20    3.90
   0   9  -1    0.50    1.30
   0 -10   1    4.20    8.50
   0  10  -1    0.50    5.10
   0 -11   1   -2.90    8.50
   0  11  -1   -2.50    4.80
   0  11  -1   -6.50    5.50
   0 -12   1   -1.40    9.70
   0  12  -1   -5.90    5.70
   0  12  -1   -3.40    6.00
   0 -13   1    1.80   11.00
   0  13  -1   -3.40    7.00
   0 -14   1    4.30   11.70
   0 -15   1    2.30   12.50
   0 -16   1   19.90   17.40
   0 -17   1    7.70   15.70
   0 -18   1  -12.60   15.50
   0 -19  -2   75.59   31.00
   0 -18  -2   -3.30   18.10
   0 -17  -2  224.48   41.60
   0 -16  -2  343.67   50.59
   0 -15  -2   13.20   16.40
   0 -14  -2  660.23   62.69
   0  13   2  607.14   57.29
   0  13   2  542.65   35.90
   0 -13  -2  620.64   55.99
   0  12   2  135.49    9.60
   0  12   2  146.59   21.50
   0 -12  -2  163.98   29.20
   0  11   2   92.09   16.40
   0 -11  -2  170.28   27.00
   0  10   2 1235.48   75.99
   0  10   2 1251.07   82.39
   0 -10  -2 1174.88   88.49
   0   9   2 1046.00   70.59
   0   9   2 1062.59   65.49
   0  -9  -2 1032.90   76.59
   0   8   2   13.60    7.00
   0   8   2    8.80    3.60
   0  -8  -2   26.80    7.90
   0  -8  -2   32.50    7.60
   0  -8  -2   32.00   10.70
   0   7   2 2800.92  159.18
   0   7   2 2847.22  162.48
   0  -7  -2 2457.65  162.98
   0  -7  -2 2628.74  167.18
   0  -7  -2 2439.66  163.68
   0   6   2  441.16   35.70
   0   6   2  469.25   33.70
   0  -6  -2  604.84   41.50
   0  -6  -2  605.84   41.60
   0  -6  -2  591.64   40.30
   0   5   2  286.67   19.60
   0   5   2  279.77   21.70
   0  -5  -2  280.97   25.00
   0  -5  -2  279.37   24.50
   0  -5  -2  276.67   25.60
   0   4   2  332.77   23.00
   0   4   2  340.07   20.80
   0  -4  -2  263.27   25.90
   0  -4  -2  253.97   23.80
   0  -4  -2  304.87   26.30
   0  -3  -2 1355.06   90.29
   0  -3  -2 1348.37   89.69
   0  -3  -2 1426.46   84.49
   0  -3  -2 1429.36   87.89
   0   2   2   94.39    6.80
   0   2   2  101.49   13.50
   0   2   2   88.69   12.90
   0   2   2   87.89    9.80
   0   2   2   85.69    6.10
   0  -2  -2   65.89   11.20
   0  -2  -2   65.39   11.10
   0  -2  -2   59.39    8.00
   0   1   2 1829.32  100.89
   0   1   2 1732.53  100.39
   0   1   2 1792.42  100.19
   0   1   2 1678.93  102.69
   0   1   2 1825.32  100.39
   0   1   2 1877.21  105.99
   0  -1  -2 1584.14  102.29
   0  -1  -2 1450.75  100.29
   0  -1  -2 1707.73   99.99
   0  -1  -2 1564.64  104.59
   0  -1  -2 1469.55  100.09
   0  -1   2 1534.85   99.89
   0  -1   2 1745.93   96.09
   0  -1   2 1702.73   95.89
   0  -1   2 1708.23   96.59
   0  -1   2 1751.02  100.69
   0   1  -2 1607.14   95.89
   0   1  -2 1541.95   99.89
   0   1  -2 1590.74   97.69
   0   1  -2 1586.94   96.09
   0   1  -2 1418.16   99.69
   0   1  -2 1654.13   95.89
   0   1  -2 1527.35   96.39
   0   1  -2 1601.24   96.39
   0  -2   2   90.09    7.80
   0  -2   2   95.89    6.30
   0  -2   2   82.79   10.30
   0  -2   2   85.09   10.40
   0   2  -2   67.99    9.60
   0   2  -2   76.69    7.40
   0   2  -2   79.29    9.90
   0   2  -2   68.69    6.00
   0  -3   2 1865.71   92.69
   0   3  -2 1408.06   91.79
   0   3  -2 1500.05   92.39
   0   3  -2 1393.06   88.59
   0   3  -2 1384.56   88.79
   0   3  -2 1463.65   92.09
   0  -4   2  360.56   20.00
   0  -4   2  346.77   22.30
   0  -4   2  354.86   22.20
   0  -4   2  370.76   25.30
   0   4  -2  271.67   20.20
   0   4  -2  245.58   23.50
   0  -5   2  251.47   22.20
   0   5  -2  280.57   17.50
   0  -6   2  464.95   41.10
   0   6  -2  627.64   35.50
   0  -7   2 2947.41  167.98
   0   7  -2 2480.65  157.18
   0  -8   2    3.00    6.80
   0  -9   2 1052.49   76.49
   0   9  -2 1076.49   68.59
   0 -10   2 1400.76   92.29
   0  10  -2 1207.48   81.09
   0 -11   2   84.29   20.70
   0  11  -2  123.89   15.00
   0  11  -2  126.39   15.10
   0 -12   2  160.18   27.40
   0  12  -2  128.19   16.90
   0 -13   2  596.04   56.29
   0  13  -2  617.54   45.50
   0 -14   2  714.73   65.19
   0 -15   2   28.10   18.30
   0 -16   2  318.47   49.30
   0 -17   2  251.27   46.40
   0 -19  -3   12.50   23.80
   0 -18  -3  -39.30   14.50
   0 -17  -3    1.20   16.70
   0 -16  -3    4.70   15.80
   0 -15  -3   -4.20   14.00
   0  14   3   -1.00    3.80
   0 -14  -3   -2.60   10.60
   0  13   3    0.80    5.20
   0  13   3    7.10    4.00
   0 -13  -3    1.70   11.80
   0  12   3    0.00    4.20
   0  12   3   -3.70    7.40
   0  12   3    0.60    2.80
   0 -12  -3    6.30   10.90
   0  11   3    5.10    8.30
   0  11   3   -1.60    2.30
   0  11   3    1.40    2.40
   0 -11  -3    5.80    8.30
   0  10   3    2.20    1.90
   0  10   3    0.10    1.50
   0  10   3    1.10    3.40
   0  10   3    2.50    7.00
   0 -10  -3   -0.20    7.90
   0   9   3    0.80    2.70
   0   9   3    2.20    7.00
   0  -9  -3    3.40    7.50
   0  -9  -3   -6.10    5.40
   0  -9  -3   -0.10    6.60
   0   8   3   -5.70    5.20
   0   8   3   -3.90    2.10
   0  -8  -3   -5.40    3.40
   0  -8  -3   -0.80    6.00
   0  -8  -3    0.40    7.10
   0   7   3    2.20    5.10
   0   7   3    0.70    2.40
   0   7   3    2.60    2.70
   0  -7  -3    2.00    6.40
   0  -7  -3    7.00    7.90
   0  -7  -3    7.90    7.00
   0   6   3    0.70    4.60
   0   6   3   -1.40    2.10
   0  -6  -3    3.00    6.70
   0  -6  -3    3.60    5.60
   0  -6  -3    3.00    7.40
   0   5   3    0.30    0.80
   0   5   3    0.30    0.90
   0   5   3   -6.70    3.00
   0   5   3    0.20    1.90
   0  -5  -3    3.70    6.40
   0  -5  -3    0.90    6.20
   0  -5  -3    1.90    4.40
   0   4   3   -0.10    1.50
   0   4   3    2.70    2.10
   0   4   3    0.60    3.70
   0   4   3    0.60    1.20
   0   4   3    1.70    1.30
   0  -4  -3    2.40    6.50
   0  -4  -3   -0.40    5.50
   0  -4  -3    3.50    3.20
   0  -4  -3    3.70    2.90
   0   3   3    5.40    4.50
   0   3   3    0.40    2.20
   0   3   3    1.60    1.40
   0   3   3    7.60    7.30
   0   3   3    1.50    6.40
   0  -3  -3   10.10    6.90
   0  -3  -3   -0.30    3.40
   0  -3  -3   10.90    7.70
   0   2   3    0.00    1.60
   0   2   3    2.00    1.50
   0   2   3    1.80    4.40
   0   2   3   -0.30    2.50
   0   2   3   -2.00    5.60
   0   2   3    2.30    1.60
   0   2   3   -1.70    5.40
   0  -2  -3   -2.30    3.70
   0  -2  -3    2.20    6.00
   0  -2  -3    0.50    1.10
   0  -2  -3   -5.20    5.60
   0  -2  -3   -1.10    1.80
   0   1   3   -8.50    3.80
   0   1   3   -3.10    3.10
   0   1   3    1.10    1.70
   0   1   3    0.20    2.20
   0   1   3    2.60    1.90
   0   1   3   -3.00    4.40
   0   1   3    3.30    1.50
   0   1   3    0.90    1.20
   0  -1  -3    9.00    5.70
   0  -1  -3    1.10    1.60
   0  -1  -3    0.80    1.10
   0  -1  -3    4.30    2.40
   0  -1  -3    3.00    3.70
   0  -1  -3   -9.20    3.90
   0  -1  -3    0.70    1.30
   0   0   3    3.00    5.60
   0   0   3    4.20    1.60
   0   0   3    0.80    1.70
   0   0   3    3.20    2.70
   0   0   3    1.50    1.40
   0   0   3   11.60    4.70
   0   0   3   -0.70    1.30
   0   0   3    0.60    1.30
   0   0  -3    4.00    3.90
   0   0  -3    4.80    5.70
   0   0  -3    3.30    5.50
   0   0  -3    0.90    1.30
   0   0  -3    4.10    1.90
   0   0  -3   -0.10    0.40
   0   0  -3    2.60    2.50
   0   0  -3    1.30    1.70
   0  -1   3    2.60    1.30
   0  -1   3   -0.20    1.30
   0  -1   3    1.80    2.20
   0  -1   3   -0.20    1.30
   0  -1   3    0.10    1.20
   0  -1   3    0.20    0.70
   0  -1   3   -1.10    1.10
   0  -1   3   -1.10    4.30
   0  -1   3    2.80    4.60
   0   1  -3    3.40    1.40
   0   1  -3    1.70    1.50
   0   1  -3    5.30    4.90
   0   1  -3    0.40    1.80
   0   1  -3   -0.20    0.90
   0   1  -3    7.40    3.50
   0   1  -3   -2.00    0.90
   0   1  -3    4.40    4.70
   0  -2   3    2.00    1.20
   0  -2   3   -3.50    4.60
   0  -2   3   -2.30    4.50
   0  -2   3    1.80    1.70
   0   2  -3    4.40    1.30
   0   2  -3    0.60    1.40
   0   2  -3   -0.30    0.90
   0   2  -3   -0.70    0.90
   0   2  -3    0.70    2.60
   0   2  -3    0.90    4.90
   0   2  -3   -0.90    4.50
   0   2  -3    1.20    0.80
   0   2  -3    0.30    0.70
   0  -3   3    2.90    5.00
   0  -3   3    4.50    4.80
   0  -3   3    0.20    1.40
   0   3  -3    2.60    1.60
   0   3  -3    2.10    5.20
   0   3  -3    5.00    3.10
   0  -4   3    1.10    1.30
   0  -4   3    2.60    3.80
   0  -4   3    0.50    2.60
   0   4  -3    0.90    1.00
   0   4  -3    0.10    1.30
   0  -5   3    0.70    3.00
   0  -5   3    1.00    3.80
   0  -5   3    2.00    1.10
   0  -5   3   -1.90    2.80
   0   5  -3   -0.10    1.30
   0   5  -3    0.70    1.40
   0  -6   3   -3.10    3.60
   0   6  -3    2.90    1.70
   0   6  -3    1.40    2.00
   0  -7   3    4.50    5.90
   0   7  -3    1.20    2.30
   0   7  -3    0.80    1.40
   0  -8   3   -4.80    4.20
   0   8  -3   -2.30    2.60
   0   8  -3    2.60    1.50
   0  -9   3   -0.70    6.70
   0   9  -3    4.00    3.40
   0 -10   3    1.80    7.70
   0  10  -3    4.90    3.80
   0  10  -3   -2.60    3.10
   0 -11   3    1.90    8.90
   0  11  -3   -4.00    3.90
   0 -12   3   -1.20    9.10
   0  12  -3   -1.10    6.00
   0 -13   3   -7.00    9.40
   0  13  -3   -2.40    6.40
   0 -14   3   -3.40   11.50
   0 -15   3   -1.70   11.20
   0 -16   3   21.60   17.10
   0 -19  -4  200.48   47.90
   0 -18  -4   49.10   26.10
   0 -17  -4  181.98   39.20
   0 -16  -4  479.55   62.09
   0  15   4   -3.90    4.70
   0 -15  -4  -13.90   13.70
   0  14   4  412.86   30.80
   0  14   4  407.96   37.20
   0 -14  -4  479.95   56.89
   0  13   4  379.56   30.80
   0  13   4  373.76   27.70
   0 -13  -4  398.66   49.90
   0  12   4   41.10    7.50
   0  12   4   55.79   15.80
   0  12   4   39.90    9.70
   0 -12  -4   67.19   19.10
   0  11   4  202.88   18.30
   0  11   4  203.98   16.30
   0  11   4  242.18   29.30
   0 -11  -4  189.08   31.30
   0  10   4  507.05   41.30
   0  10   4  431.16   30.10
   0  10   4  466.95   32.60
   0  10   4  491.65   30.70
   0  10   4  491.35   32.30
   0 -10  -4  456.75   43.20
   0 -10  -4  388.66   36.20
   0 -10  -4  396.26   36.80
   0   9   4  518.75   43.40
   0   9   4  548.05   36.60
   0   9   4  580.24   34.50
   0   9   4  531.85   35.50
   0   9   4  517.25   34.00
   0  -9  -4  490.65   45.50
   0  -9  -4  447.86   43.60
   0  -9  -4  489.15   43.10
   0   8   4   68.39    7.60
   0   8   4   63.59    8.50
   0   8   4   61.19   13.70
   0   8   4   59.49    7.00
   0   8   4   63.19    9.20
   0  -8  -4   47.10   14.50
   0  -8  -4   74.69   17.20
   0  -8  -4   85.49   17.30
   0   7   4 1465.25   92.59
   0   7   4 1493.85   91.59
   0   7   4 1528.95   91.69
   0   7   4 1459.45   99.39
   0   7   4 1452.75   93.69
   0  -7  -4 1639.04  104.99
   0  -7  -4 1503.55  105.59
   0  -7  -4 1678.53  103.29
   0   6   4  661.53   43.10
   0   6   4  674.83   42.10
   0   6   4  649.14   41.90
   0   6   4  634.64   43.80
   0   6   4  645.34   48.80
   0   6   4  661.43   44.00
   0  -6  -4  749.23   56.69
   0  -6  -4  738.03   55.09
   0  -6  -4  716.23   50.89
   0   5   4   85.19    7.70
   0   5   4   91.89   14.40
   0   5   4   95.49   10.00
   0   5   4   77.19    9.60
   0  -5  -4   96.49   15.40
   0  -5  -4  102.59   19.10
   0  -5  -4   72.79    9.60
   0  -5  -4   75.49   16.50
   0   4   4 2863.51  172.98
   0   4   4 2708.33  171.68
   0   4   4 2714.93  177.28
   0  -4  -4 2972.90  178.08
   0  -4  -4 2858.91  183.28
   0  -4  -4 3087.09  175.48
   0  -4  -4 2986.00  184.78
   0   3   4 3349.76  216.48
   0   3   4 3669.73  211.68
   0   3   4 3611.44  222.28
   0   3   4 3457.35  212.48
   0   3   4 3492.75  211.18
   0   3   4 3361.26  212.08
   0   3   4 3514.25  212.18
   0   3   4 3545.15  221.88
   0  -3  -4 3647.64  210.48
   0  -3  -4 3665.23  222.48
   0  -3  -4 3740.43  223.78
   0  -3  -4 3694.23  215.48
   0  -3  -4 3789.22  209.98
   0  -3  -4 3229.68  209.68
   0   2   4 1658.23  101.39
   0   2   4 1535.55   91.49
   0   2   4 1541.85   90.49
   0   2   4 1498.45   95.39
   0   2   4 1521.25   99.99
   0   2   4 1454.85   90.59
   0   2   4 1493.05   89.99
   0   2   4 1410.46   90.29
   0  -2  -4 1465.55   90.49
   0  -2  -4 1408.06   99.29
   0  -2  -4 1463.35   90.29
   0  -2  -4 1481.45   89.69
   0  -2  -4 1480.75   89.59
   0  -2  -4 1413.96   99.99
   0  -2  -4 1422.66   94.19
   0   1   4 1188.58   74.49
   0   1   4 1054.99   63.59
   0   1   4 1102.09   64.09
   0   1   4 1102.19   73.29
   0   1   4 1116.49   69.19
   0   1   4 1097.99   64.39
   0   1   4 1184.08   64.69
   0   1   4 1084.29   65.29
   0  -1  -4  938.51   67.79
   0  -1  -4  956.40   63.69
   0  -1  -4  849.61   71.29
   0  -1  -4  980.20   63.39
   0  -1  -4  987.10   63.79
   0  -1  -4  975.50   64.69
   0  -1  -4  880.41   71.09
   0   0   4 4716.03  305.77
   0   0   4 4879.71  297.77
   0   0   4 4753.22  301.47
   0   0   4 4798.12  297.07
   0   0   4 4630.14  298.47
   0   0   4 4572.54  297.17
   0   0   4 4539.05  297.57
   0   0  -4 5500.25  297.47
   0   0  -4 5303.97  298.07
   0   0  -4 5550.04  299.27
   0   0  -4 5453.15  307.07
   0   0  -4 4953.90  306.27
   0   0  -4 5425.56  302.77
   0   0  -4 5237.28  297.97
   0  -1   4 1146.29   73.19
   0  -1   4 1096.69   64.49
   0  -1   4 1143.39   63.49
   0  -1   4 1045.60   71.69
   0  -1   4 1133.59   63.89
   0  -1   4 1173.38   64.09
   0  -1   4 1124.99   64.49
   0  -1   4 1072.39   67.39
   0   1  -4 1022.40   63.59
   0   1  -4  911.01   63.89
   0   1  -4  897.91   67.09
   0   1  -4  981.70   64.79
   0   1  -4  941.91   63.69
   0   1  -4  980.80   64.09
   0   1  -4  973.50   71.19
   0   1  -4  987.80   71.69
   0  -2   4 1490.25   90.59
   0  -2   4 1461.05   87.39
   0  -2   4 1472.35   88.19
   0  -2   4 1425.36   88.69
   0  -2   4 1526.05   96.89
   0  -2   4 1405.76   87.19
   0  -2   4 1373.36   95.39
   0   2  -4 1430.56   91.49
   0   2  -4 1533.25   87.69
   0   2  -4 1480.55   96.49
   0   2  -4 1435.06   88.39
   0   2  -4 1486.25   96.19
   0   2  -4 1445.86   88.09
   0   2  -4 1502.85   88.09
   0   2  -4 1436.56   88.69
   0  -3   4 3458.15  211.08
   0  -3   4 3348.66  218.88
   0  -3   4 3441.56  219.38
   0  -3   4 3416.76  212.38
   0   3  -4 3755.62  215.38
   0   3  -4 3725.13  210.88
   0   3  -4 3709.03  211.58
   0   3  -4 3599.54  211.88
   0   3  -4 3663.53  215.18
   0   3  -4 3547.25  212.68
   0  -4   4 2615.64  168.98
   0  -4   4 2588.44  168.98
   0  -4   4 2730.73  162.78
   0   4  -4 2925.21  163.28
   0  -5   4   68.79   11.60
   0  -5   4   62.19   11.40
   0  -5   4   79.29    6.80
   0   5  -4   91.89    7.60
   0  -6   4  692.13   49.20
   0  -6   4  678.63   41.20
   0  -6   4  607.74   44.40
   0  -6   4  657.83   44.70
   0  -6   4  652.53   41.20
   0   6  -4  736.93   42.80
   0   6  -4  722.93   41.00
   0  -7   4 1556.04  105.89
   0   7  -4 1642.84   97.09
   0   7  -4 1644.54   97.89
   0  -8   4   77.09   15.20
   0   8  -4   75.69    6.80
   0   8  -4   81.59    6.90
   0   8  -4   79.49    6.80
   0  -9   4  560.84   43.80
   0   9  -4  493.15   32.10
   0   9  -4  500.85   32.10
   0 -10   4  440.86   40.70
   0  10  -4  435.16   28.30
   0  10  -4  446.76   28.40
   0 -11   4  254.17   34.10
   0 -12   4   47.50   17.40
   0 -13   4  380.76   48.00
   0  13  -4  428.56   34.60
   0 -14   4  451.35   55.49
   0 -18  -5  -12.20   16.30
   0 -17  -5   18.40   19.20
   0  16   5    1.40    6.70
   0 -16  -5    3.70   14.80
   0  15   5   -2.40    5.30
   0 -15  -5  -13.40   12.20
   0  14   5   -7.30    7.30
   0  14   5    0.90    5.10
   0 -14  -5    7.00   14.50
   0  13   5   -0.30    3.80
   0  13   5   -0.30    6.60
   0 -13  -5   10.60   12.80
   0  12   5   -0.70    4.30
   0  12   5   -3.20    6.50
   0  12   5   -4.10   10.20
   0 -12  -5   11.20   11.80
   0  11   5   -2.80    5.20
   0  11   5   -2.00    3.40
   0  11   5   10.80   10.20
   0 -11  -5   -5.60    7.30
   0 -11  -5   -8.80    8.70
   0 -11  -5   -2.70    7.30
   0  10   5    3.00    3.90
   0  10   5  -10.10    6.80
   0  10   5   -3.70    2.60
   0  10   5   -1.60    5.00
   0 -10  -5    1.10    7.90
   0 -10  -5   -2.40    8.30
   0 -10  -5   -5.10    8.00
   0   9   5    8.90    8.70
   0   9   5    0.90    3.00
   0   9   5   -3.10    3.40
   0   9   5   -1.10    4.90
   0  -9  -5  -12.90    5.30
   0  -9  -5   -3.80    8.60
   0  -9  -5  -10.60    7.70
   0   8   5    1.60    2.80
   0   8   5    5.60    4.80
   0   8   5   -1.70    2.90
   0   8   5   -5.80    7.00
   0  -8  -5   -4.00    3.80
   0  -8  -5   -7.30    8.60
   0  -8  -5   10.50   11.20
   0   7   5    0.00    2.40
   0   7   5    2.90    3.50
   0   7   5   -4.70    6.30
   0   7   5    0.70    4.00
   0  -7  -5    9.20   10.30
   0  -7  -5    3.40    6.70
   0  -7  -5   12.70   12.40
   0   6   5   -0.90    3.50
   0   6   5   -9.00    5.00
   0   6   5   -2.40    1.80
   0   6   5   -0.20    2.40
   0  -6  -5   -2.40    3.30
   0  -6  -5   -2.50    8.30
   0  -6  -5    1.90    4.30
   0  -6  -5   -3.00    8.10
   0   5   5   -2.60    1.90
   0   5   5    0.50    2.50
   0   5   5   -0.30    4.00
   0   5   5    1.00    2.70
   0   5   5    0.10    2.20
   0   5   5    4.10    6.30
   0  -5  -5    9.70   10.50
   0  -5  -5    5.90    5.60
   0  -5  -5   -9.30    3.30
   0  -5  -5    4.80    9.10
   0   4   5   -1.70    1.90
   0   4   5    1.30    2.60
   0   4   5    0.00    2.20
   0   4   5   -3.80    5.20
   0   4   5   -6.10    2.60
   0   4   5   -2.70    2.10
   0  -4  -5   -2.70    4.30
   0  -4  -5    6.90    9.30
   0  -4  -5    0.70    8.30
   0   3   5    0.70    2.20
   0   3   5    3.80    2.70
   0   3   5    0.30    1.90
   0   3   5    1.10    1.80
   0   3   5    7.60    6.80
   0   3   5   -1.10    7.50
   0   3   5    5.20    4.00
   0   3   5   -0.20    7.30
   0  -3  -5    0.60    6.80
   0  -3  -5    2.30    4.80
   0  -3  -5   -3.90    7.00
   0  -3  -5   -0.40    2.20
   0  -3  -5   -0.50    1.60
   0   2   5    3.70    6.30
   0   2   5    3.30    2.40
   0   2   5    2.30    3.80
   0   2   5   -2.60    1.90
   0   2   5   -2.00    8.00
   0   2   5    1.50    2.00
   0   2   5    2.60    2.60
   0   2   5   -5.50    7.20
   0  -2  -5   -7.10    4.60
   0  -2  -5    1.20    2.10
   0  -2  -5   -2.20    1.50
   0  -2  -5    6.70    9.00
   0  -2  -5    3.80    3.70
   0  -2  -5    5.40    2.90
   0  -2  -5    4.70    9.10
   0   1   5    4.30    3.20
   0   1   5   -1.10    6.10
   0   1   5    6.60    9.50
   0   1   5   -1.10    1.50
   0   1   5   -3.90    3.10
   0   1   5    1.00    2.40
   0   1   5    2.60    2.10
   0   1   5   -3.70    8.70
   0  -1  -5    2.50    8.80
   0  -1  -5    1.40    2.90
   0  -1  -5    0.20    3.40
   0  -1  -5    1.80    2.30
   0  -1  -5   -2.00    1.70
   0  -1  -5    1.10    8.60
   0  -1  -5   -2.30    5.30
   0   0   5   -0.40    7.90
   0   0   5    3.50    2.20
   0   0   5    2.50    2.80
   0   0   5    6.80    4.20
   0   0   5   -0.60    6.40
   0   0   5    4.50    2.60
   0   0   5   -0.70    5.20
   0   0   5    4.20    2.20
   0   0  -5   -0.50    5.30
   0   0  -5    4.20    3.80
   0   0  -5    4.80    2.70
   0   0  -5    0.00    9.20
   0   0  -5    4.10    2.30
   0   0  -5    9.60    9.80
   0   0  -5    7.40    3.30
   0  -1   5    5.30    8.60
   0  -1   5    1.30    2.90
   0  -1   5   -1.20    2.00
   0  -1   5   -5.20    3.70
   0  -1   5    3.60    2.10
   0  -1   5   -0.20    2.40
   0  -1   5   -0.70    1.50
   0  -1   5   -1.20    7.80
   0   1  -5    0.20    2.70
   0   1  -5   -0.80    1.40
   0   1  -5    0.30    3.30
   0   1  -5    1.70    2.30
   0   1  -5   -6.60    4.60
   0   1  -5   11.40    9.20
   0   1  -5    4.10    2.30
   0   1  -5   -5.00    7.10
   0  -2   5    5.30    8.20
   0  -2   5   -0.80    1.50
   0  -2   5    0.50    2.30
   0  -2   5   -0.30    1.60
   0  -2   5   -0.80    1.40
   0  -2   5    0.90    1.40
   0  -2   5    4.90    7.90
   0  -2   5   -1.40    1.30
   0  -2   5    0.10    0.60
   0   2  -5    2.10    2.20
   0   2  -5   -1.80    2.50
   0   2  -5   -6.30    5.90
   0   2  -5   -0.30    1.40
   0   2  -5    0.80    2.30
   0   2  -5    4.50    2.30
   0   2  -5    4.10    7.60
   0   2  -5    6.10    5.10
   0  -3   5    3.00    6.50
   0  -3   5    0.40    1.40
   0  -3   5   -0.40    2.00
   0  -3   5    0.80    6.40
   0   3  -5    1.10    1.60
   0   3  -5    0.50    1.80
   0   3  -5   -0.10    1.20
   0   3  -5    1.90    2.00
   0   3  -5    5.10    4.10
   0   3  -5    2.30    1.90
   0  -4   5    0.10    0.60
   0  -4   5   -1.00    2.10
   0  -4   5   -1.10    5.40
   0  -4   5   -9.40    4.30
   0   4  -5    0.50    1.40
   0   4  -5    2.20    1.50
   0   4  -5    2.80    2.40
   0   4  -5   -0.30    0.70
   0   4  -5    1.30    1.60
   0   4  -5   -0.80    0.80
   0   4  -5    1.20    3.60
   0  -5   5   -1.50    1.80
   0  -5   5   -4.50    5.10
   0  -5   5   -1.40    5.20
   0   5  -5    0.30    3.40
   0   5  -5   -0.30    1.00
   0   5  -5    0.10    1.20
   0   5  -5   -1.50    1.80
   0  -6   5    7.50    5.80
   0  -6   5    1.80    2.00
   0  -6   5    0.50    5.10
   0   6  -5    1.60    2.40
   0  -7   5    2.40    1.20
   0  -7   5    2.90    3.40
   0  -7   5    1.10    1.10
   0  -7   5   -1.00    3.40
   0   7  -5    2.50    2.50
   0  -8   5   -2.10    5.40
   0   8  -5   -0.30    2.00
   0  -9   5   10.80    8.20
   0 -10   5    6.80    8.90
   0 -11   5  -10.00    6.60
   0  13  -5   -1.80    6.30
   0 -18  -6   22.30   21.00
   0 -17  -6  344.47   54.59
   0  16   6  248.38   27.60
   0 -16  -6  279.77   46.20
   0  15   6    0.30    6.30
   0  15   6   -6.40   10.10
   0 -15  -6  -11.20   10.70
   0  14   6  347.67   35.70
   0  14   6  269.27   25.10
   0 -14  -6  341.57   47.50
   0  13   6  672.23   48.20
   0  13   6  693.13   52.59
   0 -13  -6  759.22   65.59
   0  12   6  225.08   38.70
   0  12   6  187.28   20.40
   0  12   6  256.27   26.80
   0 -12  -6  225.38   25.80
   0 -12  -6  203.98   24.50
   0 -12  -6  185.28   33.10
   0  11   6  214.48   19.50
   0  11   6  250.77   26.10
   0  11   6  225.98   32.90
   0 -11  -6  277.87   38.10
   0 -11  -6  198.08   31.10
   0 -11  -6  244.28   31.60
   0  10   6  637.34   56.79
   0  10   6  702.93   47.90
   0  10   6  665.03   45.90
   0  10   6  683.93   49.00
   0 -10  -6  670.63   60.39
   0 -10  -6  689.03   58.99
   0 -10  -6  729.63   59.19
   0   9   6  333.47   27.50
   0   9   6  326.27   38.10
   0   9   6  337.07   26.60
   0   9   6  341.67   25.00
   0  -9  -6  252.27   39.50
   0  -9  -6  344.77   39.90
   0  -9  -6  329.07   41.40
   0   8   6   30.60   13.10
   0   8   6   47.00    9.10
   0   8   6   49.20   10.40
   0   8   6   47.80    9.30
   0   8   6   37.20    7.20
   0  -8  -6   71.79   17.10
   0  -8  -6   57.89   19.30
   0  -8  -6   56.59   17.80
   0   7   6 2872.71  170.18
   0   7   6 2844.12  172.58
   0   7   6 2856.11  171.88
   0   7   6 2778.12  179.98
   0   7   6 2946.71  172.48
   0  -7  -6 2770.22  168.38
   0  -7  -6 2795.72  186.78
   0  -7  -6 2623.34  187.38
   0  -7  -6 2689.33  179.08
   0   6   6  568.54   41.20
   0   6   6  648.84   41.00
   0   6   6  636.94   42.00
   0   6   6  587.94   48.60
   0   6   6  579.24   39.90
   0   6   6  596.74   42.30
   0  -6  -6  567.54   55.79
   0  -6  -6  542.95   53.49
   0  -6  -6  578.94   47.10
   0  -6  -6  618.74   42.90
   0   5   6   88.59   11.30
   0   5   6  104.29   12.30
   0   5   6  111.59   12.70
   0   5   6  102.39   13.40
   0   5   6   71.39   12.00
   0   5   6   86.59   16.70
   0   5   6   91.69   10.80
   0  -5  -6  103.69   22.70
   0  -5  -6   74.79   13.00
   0  -5  -6   89.59   22.10
   0   4   6 1787.12   98.39
   0   4   6 1573.04  105.29
   0   4   6 1712.13   99.79
   0   4   6 1715.93   98.39
   0   4   6 1619.24   98.19
   0   4   6 1639.44   97.19
   0  -4  -6 1485.55   94.59
   0  -4  -6 1415.46  101.39
   0  -4  -6 1344.97  109.49
   0  -4  -6 1440.76  111.59
   0  -4  -6 1443.76   95.29
   0   3   6 4976.00  294.47
   0   3   6 4650.63  279.37
   0   3   6 4842.72  279.47
   0   3   6 4794.62  279.27
   0   3   6 4861.41  281.07
   0   3   6 4511.45  278.27
   0   3   6 5035.20  294.57
   0   3   6 4615.44  286.47
   0  -3  -6 4720.63  277.57
   0  -3  -6 4574.84  278.77
   0  -3  -6 4140.99  292.27
   0  -3  -6 4444.46  292.37
   0  -3  -6 4435.76  284.37
   0   2   6  203.48   26.40
   0   2   6  214.38   18.60
   0   2   6  203.88   20.10
   0   2   6  232.68   18.50
   0   2   6  216.48   19.00
   0   2   6  234.08   19.50
   0   2   6  285.37   35.70
   0   2   6  219.38   31.60
   0  -2  -6  275.67   35.40
   0  -2  -6  292.87   19.20
   0  -2  -6  308.47   21.20
   0  -2  -6  303.37   26.60
   0  -2  -6  301.17   36.80
   0  -2  -6  249.08   19.20
   0  -2  -6  274.57   19.30
   0   1   6  256.67   21.70
   0   1   6  274.17   35.90
   0   1   6  371.46   40.10
   0   1   6  259.17   22.00
   0   1   6  292.77   22.80
   0   1   6  290.67   23.00
   0   1   6  281.77   28.20
   0   1   6  264.27   23.80
   0  -1  -6  422.16   26.00
   0  -1  -6  342.17   39.40
   0  -1  -6  323.97   29.30
   0  -1  -6  369.86   23.80
   0  -1  -6  385.06   41.30
   0  -1  -6  365.36   23.40
   0   0   6 1465.35   98.29
   0   0   6 1459.35  110.59
   0   0   6 1350.76  109.19
   0   0   6 1609.74   99.69
   0   0   6 1515.35  104.69
   0   0   6 1581.64   99.09
   0   0   6 1519.25   99.49
   0   0   6 1523.25  100.59
   0   0  -6 1804.62   99.29
   0   0  -6 1694.83  106.49
   0   0  -6 1745.43  113.49
   0   0  -6 1637.94   99.69
   0   0  -6 1776.02  101.79
   0   0  -6 1710.53  112.59
   0   0  -6 1770.62  100.29
   0  -1   6  287.07   22.30
   0  -1   6  261.47   22.70
   0  -1   6  275.47   21.40
   0  -1   6  269.27   21.80
   0  -1   6  304.77   36.80
   0  -1   6  268.77   22.50
   0  -1   6  229.38   25.30
   0  -1   6  264.37   34.40
   0   1  -6  375.66   23.30
   0   1  -6  360.76   22.70
   0   1  -6  317.67   28.50
   0   1  -6  404.16   36.40
   0   1  -6  430.06   36.60
   0   1  -6  380.66   24.00
   0   1  -6  357.46   23.50
   0   1  -6  369.26   25.30
   0  -2   6  207.88   29.40
   0  -2   6  229.58   16.90
   0  -2   6  254.77   31.90
   0  -2   6  214.68   17.40
   0  -2   6  229.78   17.20
   0  -2   6  236.38   17.80
   0  -2   6  215.78   18.00
   0  -2   6  240.88   19.00
   0   2  -6  310.27   34.60
   0   2  -6  302.67   20.70
   0   2  -6  291.87   24.60
   0   2  -6  270.17   19.30
   0   2  -6  262.27   32.00
   0   2  -6  259.37   19.10
   0   2  -6  276.77   19.00
   0   2  -6  284.87   18.50
   0  -3   6 4522.75  281.87
   0  -3   6 4544.35  267.27
   0  -3   6 4603.14  267.37
   0  -3   6 4629.54  269.27
   0  -3   6 4611.04  270.47
   0  -3   6 4408.26  280.87
   0   3  -6 4462.05  275.07
   0   3  -6 4689.83  269.07
   0   3  -6 4437.86  270.27
   0   3  -6 4395.26  269.57
   0   3  -6 4531.55  270.37
   0   3  -6 4427.66  269.67
   0  -4   6 1599.84   92.69
   0  -4   6 1598.84   90.49
   0  -4   6 1739.93  105.19
   0  -4   6 1607.94  103.39
   0   4  -6 1380.76   90.79
   0   4  -6 1418.26   91.49
   0   4  -6 1400.26   96.19
   0   4  -6 1454.85   92.49
   0   4  -6 1425.56   91.49
   0   4  -6 1538.85   90.79
   0  -5   6   90.69   17.60
   0  -5   6   60.09   15.10
   0  -5   6   83.79    9.90
   0   5  -6   96.19    7.30
   0   5  -6  103.89    7.30
   0   5  -6  103.99   14.40
   0   5  -6   96.49    8.10
   0   5  -6  109.49   11.30
   0   5  -6  104.09    8.80
   0   5  -6   98.29    9.10
   0  -6   6  619.64   47.50
   0  -6   6  549.15   46.00
   0  -6   6  613.64   38.60
   0   6  -6  587.64   39.00
   0   6  -6  576.74   37.80
   0   6  -6  596.34   37.50
   0   6  -6  620.74   43.20
   0  -7   6 2927.51  166.88
   0  -7   6 2731.13  173.38
   0  -7   6 2653.93  172.98
   0  -7   6 2833.32  166.88
   0   7  -6 2733.53  166.58
   0   7  -6 2786.22  166.28
   0   7  -6 2880.21  172.68
   0 -18  -7   -9.30   18.00
   0  17   7    9.60    9.10
   0 -17  -7   -0.70   16.60
   0  16   7    0.40    7.30
   0 -16  -7   16.40   17.20
   0  15   7   -5.70    5.50
   0  15   7    8.50   11.40
   0 -15  -7   -8.10   12.10
   0  14   7    6.60    6.60
   0  14   7   -9.40    8.20
   0 -14  -7    3.30   12.40
   0  13   7    2.90    9.60
   0  13   7    2.40    5.50
   0 -13  -7    4.90    5.40
   0 -13  -7   19.50   14.20
   0 -13  -7   -0.90    5.40
   0  12   7   13.20    9.20
   0  12   7   -4.20    4.80
   0 -12  -7   -5.30    9.00
   0 -12  -7  -14.40    8.30
   0 -12  -7   -2.60    7.50
   0  11   7   -2.60    4.20
   0  11   7    8.40   12.10
   0  11   7   -3.40    7.10
   0 -11  -7    1.30    9.60
   0 -11  -7  -14.40    8.60
   0 -11  -7    3.00   12.10
   0  10   7    4.70    7.20
   0  10   7   -0.40    3.90
   0  10   7    7.20   10.40
   0  10   7    0.30    4.80
   0 -10  -7   -2.90    6.80
   0 -10  -7    1.70   11.50
   0 -10  -7    3.40   12.10
   0   9   7    0.50    3.80
   0   9   7    1.10    4.60
   0   9   7   -8.70    5.10
   0   9   7    1.70   10.10
   0   9   7   -8.00    3.90
   0  -9  -7    0.40    8.60
   0  -9  -7    1.50   13.00
   0  -9  -7    6.00   13.80
   0   8   7    3.00    4.50
   0   8   7   -0.70    3.40
   0   8   7  -10.40    4.30
   0   8   7   -3.20    3.90
   0   8   7   -4.50    8.20
   0   8   7    0.60    3.90
   0  -8  -7   -1.10   10.90
   0  -8  -7    6.80   13.80
   0  -8  -7    1.00    5.30
   0   7   7   -3.40    3.50
   0   7   7    1.90    3.70
   0   7   7    0.70    3.90
   0   7   7    6.80    9.50
   0   7   7    4.60    4.30
   0   7   7   -2.40    5.90
   0  -7  -7    2.70    7.50
   0  -7  -7    2.90    5.50
   0  -7  -7    3.90   14.00
   0  -7  -7   -0.60   11.00
   0   6   7    5.20    4.20
   0   6   7   -8.30    4.50
   0   6   7   -3.70    3.40
   0   6   7   -5.70    3.10
   0   6   7   -2.20    2.80
   0   6   7   -1.80    8.00
   0  -6  -7   -7.00    5.20
   0  -6  -7   -3.40   12.30
   0  -6  -7   -7.70    8.90
   0  -6  -7    0.60    5.90
   0   5   7   -2.50    3.50
   0   5   7   -1.60    3.50
   0   5   7    0.80    2.90
   0   5   7    2.70    3.40
   0   5   7    0.60    5.00
   0   5   7    2.10    7.50
   0  -5  -7    3.00   12.10
   0  -5  -7   -4.80    9.70
   0  -5  -7   -8.10    5.30
   0   4   7    0.90    7.40
   0   4   7    0.90    5.10
   0   4   7    3.60    4.00
   0   4   7    7.50    3.80
   0   4   7    0.70    3.30
   0   4   7    1.50    2.90
   0  -4  -7    1.00    2.10
   0  -4  -7    2.60   11.70
   0  -4  -7    2.10    3.50
   0  -4  -7    2.00    6.40
   0  -4  -7    3.50   10.90
   0   3   7    2.10    2.90
   0   3   7    1.50    4.80
   0   3   7    1.50    2.60
   0   3   7   -2.80    2.60
   0   3   7  -12.40    6.70
   0   3   7   -4.90    9.00
   0   3   7   -1.60    2.70
   0   3   7    2.00    7.10
   0  -3  -7    1.70    3.00
   0  -3  -7    6.40    6.90
   0  -3  -7    1.80    2.70
   0  -3  -7   -2.00    3.20
   0  -3  -7    3.60    8.80
   0  -3  -7   12.50   11.40
   0   2   7   -1.10    8.70
   0   2   7    2.90    2.80
   0   2   7   -1.70    2.80
   0   2   7   -3.80    6.00
   0   2   7    2.60    3.00
   0   2   7    0.30    8.50
   0   2   7   -1.40    4.30
   0   2   7   -2.00    2.60
   0  -2  -7    3.00    3.00
   0  -2  -7    0.40    6.80
   0  -2  -7   -3.30    9.20
   0  -2  -7    5.10    4.60
   0  -2  -7   -2.40    2.30
   0  -2  -7   11.30   11.90
   0   1   7    2.40    9.70
   0   1   7   -4.10    8.20
   0   1   7    4.60    3.40
   0   1   7    2.20    2.50
   0   1   7   -3.90    5.60
   0   1   7   -0.80    2.80
   0   1   7   -0.10    2.10
   0   1   7   -1.20    3.80
   0  -1  -7    0.10    4.00
   0  -1  -7    1.20    2.50
   0  -1  -7   -8.20    6.70
   0  -1  -7   -1.00    2.90
   0  -1  -7    0.80    6.40
   0  -1  -7    0.90    2.40
   0  -1  -7    4.50   10.10
   0   0   7    4.50    2.70
   0   0   7    7.10    6.40
   0   0   7   15.70    4.80
   0   0   7   17.70    4.90
   0   0   7   -6.70    7.50
   0   0   7   11.80   10.70
   0   0   7   16.00    4.10
   0   0  -7    0.50    1.40
   0   0  -7    7.10    3.70
   0   0  -7    8.30    4.90
   0   0  -7    6.60   10.40
   0   0  -7   15.60    4.70
   0   0  -7   18.90    4.50
   0   0  -7    3.80    9.10
   0   0  -7    8.20    7.30
   0  -1   7   -4.80    2.80
   0  -1   7    2.10    3.00
   0  -1   7   -0.30    8.10
   0  -1   7   -4.10    7.80
   0  -1   7   -0.40    1.90
   0  -1   7    1.00    2.20
   0  -1   7   -0.50    4.70
   0  -1   7    0.30    2.50
   0   1  -7   -1.60    3.50
   0   1  -7   -0.10    5.40
   0   1  -7   -2.30    2.10
   0   1  -7    3.50    2.80
   0   1  -7   -8.40    7.00
   0   1  -7    1.00    2.20
   0   1  -7    0.10    2.70
   0   1  -7    7.60    9.50
   0  -2   7    1.90    2.20
   0  -2   7   -0.90    4.10
   0  -2   7    2.90    2.70
   0  -2   7    1.00    2.50
   0  -2   7    0.40    1.90
   0  -2   7   -0.40    2.70
   0  -2   7   -5.90    7.00
   0  -2   7    0.60    2.90
   0  -2   7   -1.70    7.40
   0   2  -7   -1.10    1.90
   0   2  -7    2.00    2.60
   0   2  -7   -1.60    3.60
   0   2  -7    0.00    2.50
   0   2  -7   12.80   10.60
   0   2  -7   -5.30    4.40
   0   2  -7   -0.90    8.60
   0   2  -7   -1.70    2.40
   0  -3   7    1.70    4.10
   0  -3   7    2.70    2.70
   0  -3   7   -5.30    6.80
   0  -3   7    2.60    1.90
   0  -3   7    2.80    3.20
   0  -3   7   -2.50    6.30
   0  -3   7   -0.30    1.30
   0  -3   7    0.80    1.00
   0   3  -7    1.80    3.00
   0   3  -7   -1.50    1.70
   0   3  -7    2.10    2.90
   0   3  -7   -2.30    2.60
   0   3  -7    1.30    2.30
   0   3  -7   -2.40    4.40
   0  -4   7    0.20    3.00
   0  -4   7   10.20    9.00
   0  -4   7    3.50    8.50
   0  -4   7    0.20    2.10
   0   4  -7   -2.30    2.40
   0   4  -7    0.40    5.10
   0   4  -7    1.60    2.30
   0   4  -7    1.30    3.00
   0   4  -7    7.50    3.60
   0   4  -7    1.70    2.50
   0  -5   7    4.10    8.90
   0  -5   7    0.90    1.00
   0  -5   7   -1.20    2.60
   0  -5   7   -1.30    7.60
   0   5  -7   -3.20    4.30
   0   5  -7   -3.40    2.50
   0   5  -7    3.70    3.30
   0   5  -7    1.60    2.80
   0   5  -7   -1.70    1.70
   0   5  -7    0.50    2.20
   0  -6   7   -1.20    7.20
   0  -6   7   -1.40    2.60
   0  -6   7    5.10    8.30
   0   6  -7    1.10    2.30
   0   6  -7    0.10    2.10
   0   6  -7   -2.30    2.10
   0   6  -7    1.20    4.80
   0   6  -7    1.10    1.80
   0  -7   7    1.70    2.80
   0  -7   7   -4.00    6.80
   0  -7   7   -1.00    2.20
   0   7  -7    2.70    1.40
   0   7  -7    0.90    5.10
   0   7  -7    3.20    2.50
   0   7  -7    4.50    2.40
   0   7  -7    4.70    1.70
   0  -8   7    5.70    6.40
   0  -8   7   -2.90    1.70
   0  -8   7    3.10    6.20
   0  -8   7   -1.30    1.70
   0   8  -7   -1.90    5.00
   0   9  -7   -3.80    5.20
   0  10  -7    1.20    5.90
   0  11  -7   -3.60    5.40
   0  12  -7    3.50    7.90
   0 -18  -8   41.80   26.20
   0  17   8  157.88   24.50
   0 -17  -8  198.78   41.40
   0  16   8  353.06   32.90
   0 -16  -8  382.16   54.89
   0  15   8    6.80    7.40
   0  15   8  -12.60   10.50
   0 -15  -8   -7.50   12.40
   0  14   8  298.27   27.20
   0  14   8  249.38   33.90
   0 -14  -8  282.67   44.80
   0  13   8 1021.50   76.39
   0  13   8 1081.29   71.59
   0 -13  -8  974.60   77.69
   0 -13  -8 1067.19   77.79
   0 -13  -8 1098.79   87.89
   0  12   8   12.30    7.00
   0  12   8   29.60   12.80
   0 -12  -8   30.10   16.60
   0 -12  -8   33.20   15.40
   0 -12  -8   -2.10   10.70
   0  11   8  443.06   51.59
   0  11   8  406.26   32.40
   0  11   8  418.36   37.10
   0 -11  -8  410.96   49.80
   0 -11  -8  380.76   51.19
   0 -11  -8  415.36   51.69
   0  10   8 1751.82  115.79
   0  10   8 1561.34   98.69
   0  10   8 1528.55  100.29
   0  10   8 1560.04  103.09
   0 -10  -8 1492.45  116.09
   0 -10  -8 1491.45  110.59
   0 -10  -8 1389.56  117.29
   0   9   8 1329.47   89.89
   0   9   8 1445.66   93.19
   0   9   8 1304.97  101.39
   0   9   8 1397.16   92.69
   0   9   8 1300.97   88.09
   0  -9  -8 1441.66  108.99
   0  -9  -8 1486.65  100.89
   0  -9  -8 1377.16  110.69
   0   8   8  231.48   33.70
   0   8   8  237.38   21.30
   0   8   8  205.58   19.10
   0   8   8  235.98   21.10
   0   8   8  185.08   24.10
   0   8   8  206.48   22.70
   0  -8  -8  171.68   27.90
   0  -8  -8  245.38   40.50
   0  -8  -8  221.58   19.50
   0  -8  -8  197.18   39.10
   0   7   8 2138.19  137.59
   0   7   8 2035.40  133.79
   0   7   8 2373.16  136.39
   0   7   8 2136.99  146.79
   0   7   8 2069.39  135.49
   0   7   8 2162.58  135.99
   0  -7  -8 2326.07  156.98
   0  -7  -8 2192.58  137.69
   0  -7  -8 2128.79  143.19
   0  -7  -8 2205.68  158.18
   0   6   8 1795.22  118.29
   0   6   8 1958.10  121.09
   0   6   8 1722.73  116.69
   0   6   8 2082.49  119.19
   0   6   8 1903.51  129.19
   0   6   8 1876.31  118.69
   0  -6  -8 1620.94  136.39
   0  -6  -8 1901.91  137.79
   0  -6  -8 2022.00  123.49
   0   5   8  303.97   28.00
   0   5   8  303.77   37.40
   0   5   8  341.77   26.70
   0   5   8  356.26   27.10
   0   5   8  323.67   25.30
   0   5   8  340.87   26.50
   0  -5  -8  322.17   47.00
   0  -5  -8  337.67   47.90
   0  -5  -8  350.76   23.10
   0  -5  -8  334.57   23.30
   0  -5  -8  294.77   21.70
   0  -5  -8  284.67   33.10
   0   4   8 2874.61  178.28
   0   4   8 2720.23  176.68
   0   4   8 2776.12  187.38
   0   4   8 3072.59  206.28
   0   4   8 3142.29  179.08
   0   4   8 2765.62  180.08
   0   4   8 2944.81  178.18
   0  -4  -8 3050.39  197.88
   0  -4  -8 2931.91  177.08
   0  -4  -8 3038.50  185.88
   0  -4  -8 2761.82  197.58
   0   3   8 8138.89  447.06
   0   3   8 7195.58  443.46
   0   3   8 7857.41  426.36
   0   3   8 6874.91  425.16
   0   3   8 7355.96  425.16
   0   3   8 7242.88  435.16
   0   3   8 7303.07  424.26
   0   3   8 7181.48  427.66
   0  -3  -8 6762.42  423.36
   0  -3  -8 6769.62  432.36
   0  -3  -8 7032.30  428.36
   0  -3  -8 6758.82  442.26
   0  -3  -8 6925.71  444.76
   0  -3  -8 6466.35  424.16
   0   2   8 2638.54  164.18
   0   2   8 2474.05  156.28
   0   2   8 2563.34  153.88
   0   2   8 2431.46  154.08
   0   2   8 2464.55  170.58
   0   2   8 2351.06  152.78
   0   2   8 2690.83  157.58
   0   2   8 2573.34  171.78
   0  -2  -8 2621.54  155.98
   0  -2  -8 2534.55  153.48
   0  -2  -8 2319.17  170.98
   0  -2  -8 2560.74  162.68
   0  -2  -8 2349.67  169.98
   0  -2  -8 2466.65  153.58
   0   1   8  105.49   24.60
   0   1   8  149.59   13.20
   0   1   8  138.09   21.90
   0   1   8  142.49   17.90
   0   1   8  115.09   14.70
   0   1   8  113.99   25.80
   0   1   8  152.58   13.70
   0  -1  -8   48.90   18.30
   0  -1  -8  168.48   24.20
   0  -1  -8  120.99   14.90
   0  -1  -8  107.29   13.50
   0  -1  -8  152.68   18.60
   0  -1  -8  151.38   28.90
   0   0   8 5991.40  395.56
   0   0   8 6259.17  397.46
   0   0   8 6201.08  381.96
   0   0   8 5865.11  387.26
   0   0   8 6266.27  379.76
   0   0   8 5906.11  380.16
   0   0   8 5939.21  378.86
   0   0  -8 6948.90  383.36
   0   0  -8 6367.46  389.16
   0   0  -8 6811.42  400.06
   0   0  -8 6856.91  379.96
   0   0  -8 6899.41  399.16
   0   0  -8 6604.44  380.96
   0  -1   8  120.99   11.80
   0  -1   8  136.19   16.00
   0  -1   8  148.89   13.20
   0  -1   8  130.19   15.10
   0  -1   8  164.28   28.60
   0  -1   8  129.19   26.50
   0  -1   8  136.99   20.60
   0   1  -8   92.79   13.60
   0   1  -8  129.69   15.00
   0   1  -8  137.39   14.70
   0   1  -8  141.59   15.20
   0   1  -8  124.29   20.90
   0   1  -8  138.39   27.80
   0   1  -8  156.48   18.50
   0   1  -8  167.08   29.10
   0  -2   8 2401.06  152.58
   0  -2   8 2353.46  158.78
   0  -2   8 2491.35  151.98
   0  -2   8 2565.64  154.08
   0  -2   8 2430.66  154.28
   0  -2   8 2593.04  170.78
   0  -2   8 2397.16  168.48
   0  -2   8 2435.26  153.28
   0  -2   8 2615.04  152.98
   0   2  -8 2564.04  162.58
   0   2  -8 2615.44  156.68
   0   2  -8 2657.83  170.78
   0   2  -8 2851.91  153.98
   0   2  -8 2509.85  154.68
   0   2  -8 2366.56  153.58
   0   2  -8 2408.26  154.08
   0   2  -8 2736.13  171.98
   0  -3   8 7279.57  415.56
   0  -3   8 7580.54  415.76
   0  -3   8 7273.57  419.56
   0  -3   8 7232.18  417.76
   0  -3   8 6945.71  434.56
   0  -3   8 7018.50  416.36
   0  -3   8 7507.95  424.46
   0  -3   8 7128.99  435.96
   0  -3   8 7156.98  419.96
   0  -3   8 6796.52  417.06
   0   3  -8 6444.46  426.26
   0   3  -8 6615.54  419.46
   0   3  -8 6952.10  419.26
   0   3  -8 6749.42  420.86
   0   3  -8 7292.57  418.66
   0   3  -8 6583.04  419.36
   0  -4   8 2790.02  174.58
   0  -4   8 2974.30  176.48
   0  -4   8 2860.51  190.48
   0  -4   8 2669.33  189.78
   0   4  -8 2910.61  175.98
   0   4  -8 3164.58  175.28
   0   4  -8 2853.21  176.08
   0   4  -8 2954.20  177.38
   0   4  -8 2866.71  183.28
   0   4  -8 2843.12  178.48
   0  -5   8  263.97   37.80
   0  -5   8  310.27   39.60
   0  -5   8  325.77   22.10
   0  -5   8  347.87   25.20
   0   5  -8  339.57   24.80
   0   5  -8  323.17   25.20
   0   5  -8  333.17   31.00
   0   5  -8  299.27   24.10
   0   5  -8  378.26   24.00
   0  -6   8 1899.31  115.29
   0  -6   8 1693.03  127.19
   0  -6   8 1766.22  127.59
   0   6  -8 1975.60  113.69
   0   6  -8 1786.02  121.49
   0   6  -8 1900.81  115.19
   0   6  -8 1877.01  114.29
   0   6  -8 1912.21  115.19
   0  -7   8 1944.91  144.69
   0  -7   8 2218.58  134.89
   0  -7   8 1970.90  145.59
   0  -7   8 2245.28  134.69
   0   7  -8 2392.66  133.59
   0   7  -8 2268.67  134.89
   0   7  -8 2271.27  142.49
   0   7  -8 2290.87  135.19
   0   7  -8 2157.48  133.59
   0  -8   8  201.68   16.50
   0  -8   8  216.58   27.10
   0  -8   8  185.18   25.30
   0  -8   8  230.38   17.00
   0   8  -8  220.38   16.20
   0   8  -8  236.38   16.00
   0   8  -8  216.18   26.10
   0   8  -8  235.08   17.40
   0  -9   8 1267.37   89.19
   0  -9   8 1240.88   89.29
   0   9  -8 1560.84   97.69
   0   9  -8 1499.95   87.29
   0   9  -8 1506.75   88.69
   0   9  -8 1591.54   87.19
   0  10  -8 1455.85   89.49
   0  10  -8 1526.75   89.39
   0  10  -8 1457.75   99.49
   0  11  -8  470.75   39.90
   0  11  -8  466.25   29.90
   0  12  -8   38.40    5.60
   0  18   9   -1.40   13.80
   0 -18  -9  -23.10   14.60
   0  17   9    9.80    9.20
   0 -17  -9    8.90   16.80
   0  16   9   10.70   13.80
   0  16   9    5.20    8.30
   0 -16  -9   27.30   17.50
   0  15   9    2.00   11.40
   0  15   9   -4.40    6.70
   0 -15  -9    5.50   14.00
   0  14   9    7.50    7.50
   0  14   9    8.90   11.80
   0 -14  -9    6.20   15.00
   0 -14  -9   -3.30    7.60
   0 -14  -9   -4.90    8.20
   0  13   9   -3.80    5.20
   0  13   9    3.70    9.70
   0 -13  -9    2.10   11.20
   0 -13  -9    1.60   12.10
   0 -13  -9    5.70   12.50
   0  12   9   -1.60    5.50
   0  12   9   -5.00    8.60
   0 -12  -9    8.50   14.90
   0 -12  -9    0.70   13.30
   0 -12  -9   10.60   11.90
   0  11   9   -4.40    4.50
   0  11   9   -3.60    7.80
   0  11   9   -5.30   12.00
   0 -11  -9  -11.90    8.00
   0 -11  -9   -3.70   13.00
   0 -11  -9  -12.00   12.20
   0  10   9   -2.10    6.90
   0  10   9    0.50    5.50
   0  10   9    1.30    5.80
   0  10   9    1.20   11.00
   0 -10  -9    6.80   10.70
   0 -10  -9    1.30   15.10
   0 -10  -9   -3.00   13.70
   0   9   9   -3.60    7.30
   0   9   9    0.40    5.50
   0   9   9    9.20    5.70
   0   9   9   -3.40    9.90
   0  -9  -9    7.00   10.20
   0  -9  -9  -10.90   13.10
   0  -9  -9    1.10   14.40
   0   8   9   -5.30    4.50
   0   8   9    2.90    5.00
   0   8   9   10.60    8.80
   0   8   9   -2.20    9.70
   0   8   9    4.00    5.20
   0   8   9   -3.60    5.70
   0  -8  -9   -4.60   16.20
   0  -8  -9   20.20   18.00
   0  -8  -9    9.50   10.30
   0  -8  -9   -7.00    5.90
   0   7   9   -2.40    3.80
   0   7   9   -2.00    4.90
   0   7   9    7.40    8.60
   0   7   9   -3.90    3.20
   0   7   9   -6.10    4.20
   0   7   9    9.80   12.00
   0  -7  -9    7.50    8.30
   0  -7  -9   23.90   19.40
   0  -7  -9   17.60   17.10
   0  -7  -9    0.40    8.10
   0   6   9   -7.70    9.00
   0   6   9   -0.30    3.70
   0   6   9   -2.00    4.10
   0   6   9  -13.80    4.40
   0   6   9   10.50    6.90
   0   6   9   -0.40    3.90
   0  -6  -9    5.00    8.60
   0  -6  -9   10.30   15.70
   0  -6  -9   -5.90   13.30
   0   5   9   -4.60    3.00
   0   5   9   -0.80    3.70
   0   5   9   -7.00    8.80
   0   5   9   -3.90    4.30
   0   5   9   -4.80    5.90
   0  -5  -9   -9.40    6.30
   0  -5  -9   -7.70    5.10
   0  -5  -9   -3.50   13.70
   0  -5  -9    9.40   14.40
   0   4   9   -2.80    3.10
   0   4   9  -11.40    5.60
   0   4   9    7.60    5.50
   0   4   9   -2.40    3.30
   0   4   9    0.50    9.00
   0   4   9    1.10   12.00
   0  -4  -9   -6.90   11.60
   0  -4  -9   -4.40   12.80
   0  -4  -9    0.60    8.20
   0   3   9    4.80    3.70
   0   3   9   -0.40    3.20
   0   3   9   -6.10    7.70
   0   3   9   -2.10    3.80
   0   3   9    6.40   12.00
   0   3   9   20.90   15.00
   0   3   9    1.90    5.70
   0  -3  -9   -0.30    3.10
   0  -3  -9    4.20    8.00
   0  -3  -9    2.20    4.30
   0  -3  -9    2.40   12.40
   0  -3  -9   -0.10   12.90
   0   2   9  -13.30    5.70
   0   2   9    5.70    4.10
   0   2   9   -1.70    4.10
   0   2   9   -3.10   10.20
   0   2   9   -2.50    5.40
   0   2   9    0.50    3.40
   0   2   9   -3.40   10.10
   0  -2  -9   -3.20    9.60
   0  -2  -9    3.00    8.10
   0  -2  -9    2.10    3.70
   0  -2  -9   -1.60    3.90
   0  -2  -9   -5.00   10.40
   0   1   9  -12.40    3.40
   0   1   9   -2.20    2.70
   0   1   9   -4.60    4.60
   0   1   9    0.50    4.00
   0   1   9    4.00    3.80
   0   1   9   -0.30   10.90
   0   1   9    0.10    7.30
   0  -1  -9    1.60    7.90
   0  -1  -9   -8.80    3.20
   0  -1  -9    4.00   11.10
   0  -1  -9    1.90    7.80
   0  -1  -9    0.50    3.10
   0   0   9   15.20   12.50
   0   0   9    1.90    7.10
   0   0   9   -0.20    4.50
   0   0   9    3.70    4.40
   0   0   9    0.10    2.80
   0   0   9    2.70   10.50
   0   0   9   -2.60    2.00
   0   0  -9   -1.20    1.40
   0   0  -9   -0.50    5.70
   0   0  -9    2.00   10.40
   0   0  -9    0.90   11.20
   0   0  -9    3.00    4.50
   0   0  -9    0.80    7.20
   0  -1   9    2.80    3.20
   0  -1   9   -3.00    9.10
   0  -1   9   -1.20   11.00
   0  -1   9   -4.00    4.20
   0  -1   9   -0.60    2.60
   0  -1   9    0.40    3.60
   0  -1   9    0.60    5.80
   0   1  -9  -10.30    8.30
   0   1  -9   -1.70    7.30
   0   1  -9   -7.20    3.80
   0   1  -9   -0.20    3.00
   0   1  -9    1.40    3.40
   0   1  -9   -3.20    5.20
   0   1  -9    6.00   12.90
   0   1  -9   -2.50    3.30
   0  -2   9   -4.00    3.10
   0  -2   9   -5.40    2.40
   0  -2   9   -1.80    5.90
   0  -2   9   -1.10    3.90
   0  -2   9   -8.00    7.70
   0  -2   9   -1.50    2.60
   0  -2   9   -8.80    9.10
   0  -2   9    2.40    3.20
   0   2  -9   -1.70    2.60
   0   2  -9   -1.70    3.10
   0   2  -9   -3.30    9.40
   0   2  -9   -4.40    3.20
   0   2  -9   -9.80    3.90
   0   2  -9    5.40   11.50
   0   2  -9    2.50    3.60
   0   2  -9    1.00    7.30
   0  -3   9    3.00    3.50
   0  -3   9    0.50    1.10
   0  -3   9   -0.40    2.40
   0  -3   9    0.60    2.20
   0  -3   9    5.00   10.80
   0  -3   9   -2.30    2.90
   0  -3   9    2.90   11.40
   0  -3   9    9.10    5.40
   0  -3   9    7.10    3.10
   0  -3   9    0.20    2.70
   0   3  -9    3.00    3.30
   0   3  -9   -2.70    3.80
   0   3  -9    1.00    3.10
   0   3  -9   -4.00    6.20
   0   3  -9    4.20    5.00
   0  -4   9   -1.20    1.60
   0  -4   9   18.40   12.40
   0  -4   9   -0.50   10.00
   0  -4   9    1.40    4.10
   0  -4   9   -1.90    2.70
   0  -4   9   -0.30    1.70
   0   4  -9    2.90    7.70
   0   4  -9   -1.50    4.50
   0   4  -9    2.80    3.60
   0   4  -9   -2.40    4.00
   0   4  -9   -2.30    2.50
   0  -5   9   -4.20    2.50
   0  -5   9    8.00   11.40
   0  -5   9   -5.10    9.20
   0  -5   9    4.80    4.60
   0   5  -9   -6.40    3.30
   0   5  -9    0.20    4.50
   0   5  -9    2.70    3.60
   0   5  -9    0.50    7.00
   0   5  -9   -1.30    2.90
   0  -6   9    2.70    3.90
   0  -6   9   -1.00   10.50
   0  -6   9   -6.10    8.20
   0   6  -9    3.80    3.90
   0   6  -9    2.80    3.40
   0   6  -9   -3.50    6.60
   0   6  -9    4.10    3.10
   0   6  -9   -0.50    3.70
   0  -7   9   -2.70    2.80
   0  -7   9   -1.80   10.00
   0  -7   9  -10.40    7.80
   0  -7   9    1.60    3.10
   0   7  -9    0.20    2.70
   0   7  -9    0.40    7.10
   0   7  -9    1.20    3.50
   0   7  -9    2.00    3.40
   0   7  -9    0.10    3.50
   0  -8   9   -0.40    3.20
   0  -8   9    4.10    9.70
   0  -8   9   -5.10    3.10
   0   8  -9    6.60    3.70
   0   8  -9    0.90    4.20
   0   8  -9    3.60    7.50
   0   8  -9   -5.20    3.40
   0  -9   9    1.90    7.60
   0  -9   9    1.50    3.00
   0  -9   9    4.00    3.20
   0  -9   9    7.80    7.30
   0   9  -9    4.30    4.10
   0   9  -9    3.10    3.30
   0   9  -9  -15.90    5.10
   0   9  -9    0.00    3.90
   0  10  -9    0.10    7.50
   0  10  -9    0.40    3.10
   0  11  -9   -4.40    8.10
   0  11  -9    1.60    3.60
   0  12  -9   -1.50    3.90
   0  13  -9   -2.30    4.00
   0  18  10   13.60   15.50
   0 -18 -10    9.00   23.00
   0  17  10  178.98   27.10
   0 -17 -10  200.18   41.50
   0  16  10  408.86   39.10
   0  16  10  487.35   53.49
   0 -16 -10  445.26   62.39
   0  15  10   -1.40    7.70
   0  15  10   24.30   16.00
   0 -15 -10   25.00   18.60
   0  14  10  198.98   31.70
   0  14  10  148.69   22.30
   0 -14 -10  179.48   30.10
   0 -14 -10  162.68   28.10
   0 -14 -10  176.88   35.40
   0  13  10  482.85   40.00
   0  13  10  431.06   49.50
   0 -13 -10  468.45   58.89
   0 -13 -10  529.35   62.59
   0 -13 -10  532.95   59.49
   0  12  10  129.19   24.00
   0  12  10  121.69   18.50
   0 -12 -10   76.19   26.30
   0 -12 -10   74.29   27.60
   0 -12 -10  112.09   26.70
   0  11  10  274.07   25.90
   0  11  10  308.67   35.80
   0 -11 -10  245.58   48.00
   0 -11 -10  263.47   45.60
   0 -11 -10  264.47   40.80
   0  10  10  615.94   50.59
   0  10  10  631.94   45.50
   0  10  10  693.33   62.49
   0 -10 -10  570.44   71.49
   0 -10 -10  458.55   68.19
   0 -10 -10  588.34   54.99
   0   9  10  613.14   48.30
   0   9  10  635.64   50.29
   0   9  10  742.13   65.29
   0   9  10  611.04   53.09
   0   9  10  699.53   54.99
   0  -9 -10  624.04   76.99
   0  -9 -10  717.93   60.09
   0  -9 -10  755.12   48.40
   0  -9 -10  737.43   84.99
   0   8  10  119.19   18.00
   0   8  10  121.09   18.20
   0   8  10  160.48   23.30
   0   8  10  153.38   29.90
   0   8  10  140.59   17.50
   0  -8 -10  100.19   18.40
   0  -8 -10  118.89   34.60
   0  -8 -10  128.79   34.70
   0  -8 -10   96.79   22.00
   0   7  10  971.80   73.79
   0   7  10 1060.89   74.39
   0   7  10 1043.90   72.79
   0   7  10 1061.59   86.59
   0   7  10 1107.59   78.09
   0  -7 -10 1150.68  101.29
   0  -7 -10 1149.48   82.79
   0  -7 -10 1278.87   81.29
   0  -7 -10 1268.87  100.79
   0   6  10  594.34   46.00
   0   6  10  553.34   40.70
   0   6  10  584.14   54.29
   0   6  10  621.24   43.40
   0   6  10  605.24   42.70
   0  -6 -10  585.84   71.89
   0  -6 -10  519.35   36.40
   0  -6 -10  536.35   35.10
   0  -6 -10  652.23   76.69
   0  -6 -10  507.15   47.60
   0   5  10  115.49   16.50
   0   5  10  122.19   20.20
   0   5  10   92.69   22.60
   0   5  10  102.29   14.80
   0   5  10  123.49   16.80
   0  -5 -10  116.99   32.80
   0  -5 -10  135.29   32.70
   0  -5 -10  126.39   23.30
   0   4  10 1412.86   88.29
   0   4  10 1456.95  110.99
   0   4  10 1403.56   91.69
   0   4  10 1329.47   88.29
   0   4  10 1375.76   87.29
   0   4  10 1403.76  100.79
   0  -4 -10 1260.47   86.99
   0  -4 -10 1225.48   95.49
   0  -4 -10 1266.07  110.39
   0  -4 -10 1338.17  109.19
   0   3  10 1283.87   90.39
   0   3  10 1443.56   88.09
   0   3  10 1565.44  112.39
   0   3  10 1556.14  111.99
   0   3  10 1343.77   86.79
   0   3  10 1358.56   88.29
   0   3  10 1320.07   98.69
   0  -3 -10 1322.87  107.79
   0  -3 -10 1193.38  107.49
   0  -3 -10 1224.48   95.79
   0  -3 -10 1281.77   86.99
   0  -3 -10 1352.06   86.59
   0   2  10  723.73   48.10
   0   2  10  773.02   69.39
   0   2  10  681.33   58.79
   0   2  10  593.74   50.39
   0   2  10  767.32   50.09
   0   2  10  710.63   67.69
   0   2  10  740.73   49.00
   0  -2 -10  543.95   71.39
   0  -2 -10  681.43   67.19
   0  -2 -10  715.03   58.89
   0  -2 -10  694.43   48.60
   0  -2 -10  616.54   47.70
   0   1  10  981.70   61.69
   0   1  10  940.81   62.99
   0   1  10  959.10   72.69
   0   1  10 1032.80   83.69
   0   1  10  931.21   65.39
   0   1  10  968.20   62.39
   0  -1 -10  817.72   61.39
   0  -1 -10  915.61   62.69
   0  -1 -10  841.62   79.39
   0  -1 -10  878.21   71.99
   0   0  10  935.91   71.39
   0   0  10  951.40   69.99
   0   0  10  988.50   87.79
   0   0  10 1069.69   88.99
   0   0  10 1016.90   78.59
   0   0  10  990.20   69.29
   0   0  10  987.50   68.59
   0   0 -10 1317.77   72.79
   0   0 -10 1325.57   84.49
   0   0 -10 1380.86   96.99
   0  -1  10  896.11   61.99
   0  -1  10  949.31   63.19
   0  -1  10  896.21   69.09
   0  -1  10  995.00   61.39
   0  -1  10  974.50   80.19
   0  -1  10  920.91   80.29
   0  -1  10  929.91   59.99
   0   1 -10  911.91   61.49
   0   1 -10  806.52   61.59
   0   1 -10  889.91   79.09
   0   1 -10  896.01   71.59
   0   1 -10  963.10   81.89
   0  -2  10  724.33   48.90
   0  -2  10  735.83   48.80
   0  -2  10  719.73   48.10
   0  -2  10  720.83   66.59
   0  -2  10  701.73   54.69
   0  -2  10  739.73   66.79
   0  -2  10  711.23   47.10
   0  -2  10  671.73   45.70
   0   2 -10  672.83   48.90
   0   2 -10  713.03   66.99
   0   2 -10  614.84   63.59
   0   2 -10  677.43   51.19
   0   2 -10  637.74   47.60
   0   2 -10  631.84   56.69
   0  -3  10 1373.56   83.79
   0  -3  10 1488.65  107.29
   0  -3  10 1433.86   84.89
   0  -3  10 1488.45  106.49
   0  -3  10 1348.37   83.49
   0  -3  10 1297.07   86.39
   0  -3  10 1386.46   86.69
   0  -3  10 1367.36   82.29
   0   3 -10 1328.47   84.99
   0   3 -10 1236.58   94.99
   0   3 -10 1176.28   85.99
   0   3 -10 1233.88   85.29
   0   3 -10 1278.67   88.49
   0  -4  10 1338.47   82.39
   0  -4  10 1448.16   86.09
   0  -4  10 1480.85  107.09
   0  -4  10 1322.47   90.69
   0  -4  10 1392.86   87.19
   0  -4  10 1339.87   82.59
   0  -4  10 1362.56  104.69
   0   4 -10 1269.57   86.89
   0   4 -10 1290.47   86.29
   0   4 -10 1225.58   94.99
   0   4 -10 1282.17   88.69
   0   4 -10 1432.86   85.89
   0  -5  10   95.59   13.80
   0  -5  10  112.39   26.50
   0  -5  10  110.49   12.20
   0  -5  10   74.99   23.60
   0   5 -10  120.59   13.80
   0   5 -10  112.39   14.40
   0   5 -10  130.09   22.00
   0   5 -10   96.99   14.10
   0   5 -10  113.89   16.70
   0  -6  10  576.44   55.79
   0  -6  10  613.44   56.79
   0  -6  10  576.34   35.10
   0  -6  10  620.54   40.30
   0   6 -10  459.85   39.00
   0   6 -10  520.15   39.50
   0   6 -10  537.95   41.10
   0   6 -10  560.04   48.40
   0   6 -10  578.94   38.70
   0  -7  10 1072.99   73.99
   0  -7  10  856.81   85.49
   0  -7  10  948.91   86.69
   0   7 -10 1304.97   74.19
   0   7 -10 1166.78   74.99
   0   7 -10 1288.87   85.79
   0   7 -10 1184.48   76.49
   0   7 -10 1286.47   78.69
   0  -8  10   91.59   22.90
   0  -8  10  134.49   25.80
   0  -8  10  176.78   14.80
   0  -8  10  136.39   15.00
   0   8 -10  124.19   15.50
   0   8 -10  118.59   16.30
   0   8 -10  133.29   22.70
   0   8 -10  145.89   15.00
   0  -9  10  660.03   55.19
   0  -9  10  683.83   45.10
   0  -9  10  664.83   44.90
   0  -9  10  641.64   54.69
   0   9 -10  723.03   47.20
   0   9 -10  755.82   57.59
   0 -10  10  617.54   43.50
   0 -10  10  630.84   43.30
   0  10 -10  674.93   44.10
   0  10 -10  618.04   53.19
   0  11 -10  259.87   21.70
   0  12 -10   89.69   12.60
   0  13 -10  508.95   37.00
   0  17  11   18.00   19.30
   0  17  11   -4.70    9.00
   0 -17 -11    1.20   17.80
   0  16  11   16.60   14.60
   0  16  11    8.00   10.30
   0 -16 -11   -6.80   15.30
   0  15  11    8.40   14.40
   0  15  11   -5.20    6.80
   0 -15 -11   -0.50    9.50
   0 -15 -11   -2.70    8.90
   0 -15 -11    0.20   14.40
   0  14  11   -2.80   12.00
   0  14  11   -1.50    7.10
   0 -14 -11   -0.20   13.10
   0 -14 -11   -1.50   14.50
   0 -14 -11    9.50   15.30
   0  13  11   -6.50   10.90
   0  13  11    1.40    7.20
   0 -13 -11   21.20   16.80
   0 -13 -11   -4.10   14.40
   0 -13 -11   -0.50   17.40
   0  12  11    1.70    6.40
   0  12  11   13.10   12.70
   0 -12 -11   12.60   17.90
   0 -12 -11    3.80   13.00
   0 -12 -11    9.40   17.60
   0  11  11   11.60    7.30
   0  11  11   -4.50    8.80
   0 -11 -11    3.80   18.50
   0 -11 -11   10.10   10.60
   0 -11 -11   -4.30   15.70
   0  10  11   -1.30   12.10
   0  10  11    0.70    5.60
   0  10  11   -1.70    9.40
   0 -10 -11   -2.10   17.30
   0 -10 -11   12.00   11.90
   0 -10 -11    1.80   16.70
   0   9  11    0.80    6.20
   0   9  11    0.00   13.70
   0   9  11   -4.90    4.90
   0   9  11  -10.20    6.90
   0   9  11   -2.10    5.00
   0  -9 -11  -14.00   13.20
   0  -9 -11  -13.90    8.10
   0  -9 -11   -0.10    7.30
   0  -9 -11  -19.60   17.80
   0   8  11  -10.00    3.90
   0   8  11  -11.60    7.20
   0   8  11    6.50   12.70
   0   8  11    0.70    5.40
   0   8  11   -7.70    6.30
   0  -8 -11   12.00   18.70
   0  -8 -11  -13.80   15.30
   0  -8 -11  -11.00    7.60
   0  -8 -11    7.70   10.50
   0   7  11   10.40    5.80
   0   7  11    7.70    7.20
   0   7  11  -10.90    5.80
   0   7  11   -5.00    4.10
   0   7  11   -2.20   13.00
   0  -7 -11   -0.20    9.00
   0  -7 -11    2.90   16.80
   0  -7 -11  -16.10   16.70
   0   6  11   -6.80    5.20
   0   6  11    1.30    4.30
   0   6  11   -3.90    4.20
   0   6  11    7.90   12.40
   0   6  11   -7.70    6.80
   0  -6 -11   -0.50   17.30
   0  -6 -11   -4.70    8.40
   0  -6 -11    1.20    2.30
   0  -6 -11    4.60   16.00
   0   5  11   -0.60    4.20
   0   5  11   -1.70    7.60
   0   5  11   -3.00    5.20
   0   5  11   -8.20   10.10
   0   5  11    3.10    5.10
   0  -5 -11  -11.80   14.40
   0  -5 -11    5.20   17.80
   0  -5 -11   -5.50    9.20
   0   4  11    6.60    7.70
   0   4  11    4.00    4.80
   0   4  11   -2.10    9.90
   0   4  11    1.10    4.50
   0   4  11    3.10    4.50
   0   4  11   -3.60   14.90
   0  -4 -11    1.50    4.10
   0  -4 -11    2.00    4.30
   0  -4 -11   29.40   20.50
   0  -4 -11    7.50   10.70
   0  -4 -11   -2.20   13.90
   0   3  11    0.80    4.00
   0   3  11   -4.40   14.40
   0   3  11   -7.40    6.00
   0   3  11    4.00    4.50
   0   3  11   -9.10   12.40
   0   3  11   -0.20    4.70
   0   3  11   10.80   11.50
   0  -3 -11   -3.20    3.90
   0  -3 -11    4.70   16.60
   0  -3 -11   -9.70    7.20
   0  -3 -11  -10.90   11.80
   0  -3 -11    0.40    3.60
   0   2  11   12.00   11.00
   0   2  11   -1.50    3.30
   0   2  11   -2.70    4.40
   0   2  11    1.00   13.60
   0   2  11    0.50    3.80
   0   2  11    9.70    8.30
   0   2  11    4.30   12.90
   0  -2 -11   -2.30   15.90
   0  -2 -11   -6.10    4.10
   0  -2 -11   -3.90   12.60
   0  -2 -11   -2.20    2.90
   0  -2 -11   10.50   10.80
   0   1  11    7.80   15.30
   0   1  11    1.20    6.90
   0   1  11   -2.50    5.10
   0   1  11   -1.30    4.70
   0   1  11   -0.80    3.40
   0   1  11   -0.40    4.30
   0   1  11   -5.60    7.30
   0  -1 -11    3.00    4.20
   0  -1 -11    2.80   14.60
   0  -1 -11   -7.50    8.10
   0  -1 -11    1.20    7.00
   0  -1 -11    2.20    5.10
   0   0  11   -2.60    7.50
   0   0  11    5.40   13.60
   0   0  11    1.20    3.40
   0   0  11    5.50    5.40
   0   0  11    2.60    3.80
   0   0  11   15.10   15.10
   0   0  11    0.80    5.90
   0   0 -11    1.20    4.70
   0   0 -11    1.10    2.30
   0   0 -11   12.30   15.80
   0   0 -11    5.90    9.90
   0   0 -11   14.70   15.10
   0  -1  11    0.70    5.70
   0  -1  11    7.20   12.90
   0  -1  11   -6.70   11.40
   0  -1  11    1.30    7.10
   0  -1  11    2.60    3.60
   0  -1  11    3.10    4.00
   0  -1  11   -2.90    4.30
   0   1 -11   -4.80    3.90
   0   1 -11    1.40    3.60
   0   1 -11  -13.60    6.70
   0   1 -11    7.70   13.80
   0   1 -11  -15.00   11.20
   0  -2  11    2.10    7.20
   0  -2  11    3.30    4.50
   0  -2  11   -2.50    2.60
   0  -2  11  -13.10    9.50
   0  -2  11   -7.10    3.70
   0  -2  11   -3.40    2.50
   0  -2  11   -2.00    4.20
   0  -2  11   60.29   23.10
   0   2 -11  -11.60   11.80
   0   2 -11  -11.50    7.90
   0   2 -11    1.80    3.60
   0   2 -11   -5.30    4.10
   0  -3  11   -3.30    3.80
   0  -3  11  -10.90   11.50
   0  -3  11    6.80    5.10
   0  -3  11   -3.10    3.20
   0  -3  11   -1.60    3.20
   0  -3  11    0.40    2.90
   0  -3  11   -4.50    2.50
   0  -3  11    1.20    2.80
   0  -3  11   -2.40   12.10
   0   3 -11   -1.60    4.20
   0   3 -11    4.60    4.30
   0   3 -11   -1.10    7.90
   0  -4  11   -2.20    2.10
   0  -4  11   -3.80   12.10
   0  -4  11    0.90    4.40
   0  -4  11   -3.30    5.40
   0  -4  11   -4.90   11.00
   0  -4  11    1.30    2.40
   0  -4  11    1.30    3.70
   0   4 -11   -2.10    6.00
   0   4 -11    0.00    3.70
   0   4 -11   -7.70    3.60
   0   4 -11    6.40    9.30
   0   4 -11   -2.60    3.30
   0  -5  11    5.00   13.10
   0  -5  11   -1.00    4.20
   0  -5  11   -4.00    3.50
   0  -5  11    0.10   13.30
   0   5 -11   -2.30    6.20
   0   5 -11   -2.80    4.90
   0   5 -11   -1.20    4.30
   0   5 -11   -4.40    8.00
   0   5 -11   -2.50    3.60
   0  -6  11   -1.10    4.30
   0  -6  11    0.70    2.90
   0  -6  11  -13.60   10.40
   0  -6  11   -1.00   12.40
   0   6 -11   -2.10    3.70
   0   6 -11    4.10    4.40
   0   6 -11    1.20    8.70
   0   6 -11   -2.40    4.80
   0   6 -11   -3.40    5.60
   0  -7  11    2.40    3.90
   0  -7  11    4.40    4.80
   0  -7  11   -4.40   12.30
   0  -7  11    6.90   13.80
   0   7 -11    2.60    6.00
   0   7 -11    1.20    4.10
   0   7 -11   -9.00    8.20
   0   7 -11    2.80    5.20
   0  -8  11    3.80   12.10
   0  -8  11    0.40    5.40
   0  -8  11   -6.90   10.80
   0  -8  11    3.10    4.80
   0   8 -11    8.10    6.40
   0   8 -11   -5.70    8.40
   0   8 -11   -4.80    6.40
   0  -9  11   -4.30    3.40
   0  -9  11   -3.80    3.40
   0  -9  11   -4.40    8.80
   0   9 -11    4.60    9.10
   0   9 -11   -4.60    4.70
   0 -10  11    2.80    3.10
   0 -10  11   11.30    9.30
   0 -10  11    8.60    9.20
   0 -10  11   -0.30    3.00
   0  10 -11    2.60    5.20
   0  11 -11    1.70    5.50
   0  12 -11   -7.40    4.80
   0  13 -11   -1.50    5.60
   0  17  12  177.48   28.90
   0  17  12  148.49   44.70
   0 -17 -12  238.68   46.60
   0  16  12  197.28   36.40
   0  16  12  221.98   30.80
   0 -16 -12  197.08   42.30
   0  15  12   34.00   13.30
   0  15  12   60.39   22.00
   0 -15 -12   44.70   22.90
   0 -15 -12   24.60   16.70
   0 -15 -12   48.40   18.40
   0  14  12  263.47   31.80
   0  14  12  262.37   38.80
   0 -14 -12  271.07   45.10
   0 -14 -12  250.27   44.70
   0 -14 -12  174.58   38.40
   0  13  12  241.68   36.60
   0  13  12  239.98   29.70
   0 -13 -12  227.78   45.50
   0 -13 -12  195.08   43.50
   0 -13 -12  223.88   41.80
   0  12  12   78.29   16.30
   0  12  12  121.19   24.70
   0 -12 -12  120.39   29.60
   0 -12 -12   87.99   31.40
   0 -12 -12  187.88   44.10
   0  11  12  168.48   22.80
   0  11  12  163.48   27.80
   0 -11 -12  112.69   36.60
   0 -11 -12   96.59   26.40
   0 -11 -12  156.68   40.90
   0  10  12  992.40   77.19
   0  10  12 1179.58  100.49
   0  10  12  977.70   70.89
   0 -10 -12  987.70   99.49
   0 -10 -12  991.50   97.19
   0 -10 -12  989.20   81.99
   0   9  12   74.49   23.70
   0   9  12   39.00   12.20
   0   9  12   42.90   11.60
   0   9  12   49.10   15.80
   0   9  12   42.00   12.90
   0  -9 -12  134.39   26.50
   0  -9 -12   92.69   33.20
   0  -9 -12  169.28   41.40
   0   8  12  125.09   19.80
   0   8  12  165.48   21.40
   0   8  12  137.69   31.80
   0   8  12  146.79   25.20
   0   8  12  193.88   24.50
   0  -8 -12  108.59   22.40
   0  -8 -12  143.99   27.30
   0  -8 -12  107.79   36.00
   0  -8 -12   77.09   33.40
   0   7  12 2213.88  144.39
   0   7  12 2224.78  144.89
   0   7  12 2172.58  160.08
   0   7  12 2137.49  148.59
   0   7  12 2124.29  142.79
   0  -7 -12 2391.66  178.38
   0  -7 -12 2564.44  153.98
   0  -7 -12 2398.06  175.18
   0   6  12  993.20   70.09
   0   6  12  977.50   68.89
   0   6  12  988.10   84.79
   0   6  12  929.31   69.99
   0   6  12  967.40   73.99
   0  -6 -12 1055.59  100.19
   0  -6 -12 1074.99   98.19
   0  -6 -12 1148.59   80.69
   0   5  12   25.20   16.20
   0   5  12   30.80    9.50
   0   5  12   36.60    9.50
   0   5  12   13.70    7.30
   0   5  12   14.10   11.60
   0  -5 -12   13.20   11.80
   0  -5 -12    1.50   17.10
   0  -5 -12   13.10   21.00
   0   4  12  938.01   82.79
   0   4  12  953.70   69.09
   0   4  12 1014.90   71.29
   0   4  12  984.40   93.89
   0   4  12 1018.70   74.79
   0   4  12 1062.29   70.89
   0  -4 -12 1038.70   70.59
   0  -4 -12  979.30   96.79
   0  -4 -12 1062.79   96.29
   0  -4 -12 1105.29   83.09
   0  -4 -12 1063.39   68.79
   0   3  12 1519.25   91.89
   0   3  12 1618.14  120.09
   0   3  12 1369.76   89.89
   0   3  12 1274.87   90.99
   0   3  12 1328.47   94.69
   0   3  12 1387.96  104.79
   0   3  12 1655.03  121.19
   0  -3 -12 1353.66  115.39
   0  -3 -12 1264.27   90.09
   0  -3 -12 1209.88  114.69
   0  -3 -12 1343.97  102.59
   0  -3 -12 1368.46   89.99
   0   2  12  248.98   22.30
   0   2  12  205.38   33.90
   0   2  12  327.07   33.70
   0   2  12  205.08   43.00
   0   2  12  246.98   27.20
   0   2  12  287.67   50.39
   0   2  12  270.17   23.60
   0  -2 -12  215.58   35.10
   0  -2 -12  185.28   42.80
   0  -2 -12  260.77   46.20
   0  -2 -12  227.98   25.50
   0  -2 -12  188.38   23.80
   0   1  12  299.57   52.79
   0   1  12  448.46   35.90
   0   1  12  445.66   33.90
   0   1  12  448.26   34.80
   0   1  12  436.36   49.90
   0   1  12  473.35   63.89
   0   1  12  409.26   37.40
   0  -1 -12  426.86   35.20
   0  -1 -12  513.55   54.89
   0  -1 -12  486.95   65.19
   0  -1 -12  431.66   34.80
   0   0  12 2757.22  181.88
   0   0  12 2642.04  170.98
   0   0  12 2726.63  168.78
   0   0  12 2759.12  195.68
   0   0  12 2596.04  172.58
   0   0  12 2795.92  194.88
   0   0  12 2796.52  170.08
   0   0 -12 2784.22  184.58
   0   0 -12 2613.94  170.98
   0   0 -12 2923.81  199.08
   0   0 -12 2935.21  197.78
   0  -1  12  406.26   36.20
   0  -1  12  473.05   36.90
   0  -1  12  505.55   45.60
   0  -1  12  440.06   62.39
   0  -1  12  435.86   34.40
   0  -1  12  524.65   65.39
   0  -1  12  451.45   36.10
   0  -1  12  409.86   33.00
   0   1 -12  447.96   62.59
   0   1 -12  541.55   56.59
   0   1 -12  474.75   35.90
   0   1 -12  418.36   35.80
   0   1 -12  505.55   65.49
   0  -2  12  297.57   35.50
   0  -2  12  204.28   41.60
   0  -2  12  295.67   24.40
   0  -2  12  262.47   23.80
   0  -2  12  273.17   21.40
   0  -2  12  254.67   24.00
   0  -2  12  273.47   47.00
   0  -2  12  252.37   22.10
   0   2 -12  178.98   25.00
   0   2 -12  284.67   39.30
   0   2 -12  187.38   40.90
   0   2 -12  237.58   23.00
   0  -3  12 1448.66  114.69
   0  -3  12 1477.35   89.39
   0  -3  12 1529.95   90.89
   0  -3  12 1574.34  117.19
   0  -3  12 1431.86   89.39
   0  -3  12 1421.76   93.09
   0  -3  12 1423.16   87.59
   0  -3  12 1361.46   91.99
   0  -3  12 1363.76   98.19
   0   3 -12 1232.48   90.59
   0   3 -12 1338.17  103.69
   0   3 -12 1268.07   92.19
   0  -4  12  956.20   88.69
   0  -4  12  985.90   73.29
   0  -4  12  953.70   67.99
   0  -4  12 1018.50   60.59
   0  -4  12 1059.79   61.19
   0  -4  12  870.01   86.39
   0  -4  12  954.30   67.09
   0  -4  12  997.60   64.39
   0  -4  12  965.70   63.79
   0   4 -12 1057.59   68.59
   0   4 -12  995.10   69.39
   0   4 -12 1074.19   81.69
   0  -5  12   57.19   10.00
   0  -5  12   27.00   18.90
   0  -5  12   39.10   21.60
   0  -5  12   37.50    9.80
   0   5 -12   42.30   10.90
   0   5 -12   61.89   19.30
   0   5 -12   36.10   10.10
   0   5 -12   41.10    9.90
   0  -6  12 1009.30   69.79
   0  -6  12  843.72   85.79
   0  -6  12  994.00   66.19
   0  -6  12  905.11   87.49
   0   6 -12 1127.59   71.19
   0   6 -12 1098.99   83.19
   0   6 -12 1244.78   70.49
   0   6 -12 1006.60   71.09
   0   6 -12 1011.00   73.29
   0  -7  12 2017.10  162.58
   0  -7  12 2218.28  144.39
   0  -7  12 2226.08  144.19
   0  -7  12 2134.49  163.28
   0   7 -12 2396.66  148.89
   0   7 -12 2490.55  159.68
   0   7 -12 2576.14  144.79
   0   7 -12 2364.26  146.49
   0  -8  12  126.49   29.10
   0  -8  12  143.09   29.90
   0  -8  12  105.89   14.50
   0  -8  12  112.89   15.00
   0   8 -12  122.39   17.60
   0   8 -12  108.29   23.80
   0  -9  12   34.00   17.10
   0  -9  12   54.09   10.20
   0  -9  12   54.89   10.20
   0  -9  12   68.69   20.80
   0   9 -12  123.39   24.90
   0   9 -12  139.99   17.10
   0 -10  12  922.51   73.79
   0 -10  12  943.01   73.59
   0 -10  12 1037.40   62.59
   0  10 -12  929.41   66.49
   0  11 -12  112.49   17.20
   0  12 -12  109.59   17.20
   0  13 -12  244.58   27.40
   0  14 -12  239.28   27.40
   0 -17 -13   12.50   20.40
   0  16  13  -10.00   16.60
   0  16  13    3.40   10.00
   0 -16 -13   -4.80   16.90
   0  15  13    9.80   17.00
   0  15  13   -1.00    8.60
   0 -15 -13    2.30   17.50
   0 -15 -13   -7.40   15.80
   0 -15 -13   -5.60   14.90
   0  14  13   -3.40   13.00
   0  14  13   -7.10    8.40
   0 -14 -13    1.50   18.30
   0 -14 -13   25.10   20.90
   0 -14 -13   10.20   13.50
   0  13  13   14.20    9.20
   0  13  13   11.70   13.80
   0 -13 -13   31.70   24.70
   0 -13 -13  -13.50   18.30
   0 -13 -13   17.10   17.30
   0  12  13    9.80    8.90
   0  12  13    6.90   12.50
   0 -12 -13   13.30   13.10
   0 -12 -13    2.00   20.10
   0 -12 -13   -1.60   17.60
   0  11  13   -8.60    4.80
   0  11  13   15.00   14.00
   0 -11 -13   -3.60   10.80
   0 -11 -13  -26.70   15.70
   0 -11 -13  -10.30   19.20
   0  10  13   10.20    7.80
   0  10  13   -7.10    9.50
   0 -10 -13   24.40   24.70
   0 -10 -13   19.10   14.70
   0 -10 -13   -3.40   20.90
   0   9  13   13.30   17.50
   0   9  13    1.90   10.60
   0   9  13    5.20    6.70
   0   9  13   10.50    9.20
   0  -9 -13  -21.90   14.80
   0  -9 -13    9.30   24.80
   0  -9 -13   -5.70    9.50
   0   8  13   -2.70    6.00
   0   8  13  -12.60    7.60
   0   8  13   -6.10   12.00
   0   8  13    0.40    6.00
   0   8  13    2.90    6.00
   0  -8 -13  -11.90   16.70
   0  -8 -13    9.70   20.10
   0  -8 -13   -6.30    4.90
   0   7  13    2.40   10.20
   0   7  13   -8.60   11.90
   0   7  13    3.10    6.20
   0   7  13    0.60    6.90
   0   7  13    6.10    6.10
   0  -7 -13    0.80   11.30
   0  -7 -13   -0.40    3.00
   0  -7 -13  -17.00   18.80
   0  -7 -13   15.30   21.50
   0   6  13    3.70    7.30
   0   6  13   -4.10    5.00
   0   6  13   -6.40    7.90
   0   6  13  -12.80   12.20
   0   6  13   -2.00    4.50
   0  -6 -13  -15.20   15.70
   0  -6 -13    1.10   10.60
   0  -6 -13   -4.60   21.00
   0   5  13   -3.30   12.10
   0   5  13    4.30    5.90
   0   5  13    0.40    6.30
   0   5  13    7.30    9.60
   0   5  13   -1.40    4.80
   0  -5 -13    1.20   10.90
   0  -5 -13    2.50   21.50
   0  -5 -13  -24.30   13.60
   0   4  13    1.20    4.80
   0   4  13  -14.50   10.10
   0   4  13   -7.20    7.40
   0   4  13  -11.20    4.30
   0   4  13    4.40    5.60
   0   4  13   -4.80   17.00
   0  -4 -13    0.80   17.60
   0  -4 -13    5.90   12.30
   0  -4 -13   -0.60    5.40
   0  -4 -13   -3.50    3.90
   0  -4 -13  -13.20   19.40
   0   3  13    2.80    8.70
   0   3  13   12.30   19.60
   0   3  13    4.10   12.90
   0   3  13   -0.10    5.80
   0   3  13   -3.40    3.70
   0   3  13  -11.90   13.70
   0   3  13   -5.30    3.70
   0  -3 -13    1.40   11.30
   0  -3 -13    4.80    6.50
   0  -3 -13    4.20   20.20
   0  -3 -13   -6.40   14.80
   0  -3 -13   -4.50    4.20
   0   2  13    1.80    4.70
   0   2  13   13.10   16.40
   0   2  13   -3.60    4.50
   0   2  13   -9.00    9.70
   0   2  13  -13.50   15.00
   0   2  13   -1.70    4.20
   0   2  13   -6.00    6.80
   0  -2 -13  -11.80   14.40
   0  -2 -13    4.50    6.30
   0  -2 -13    0.30    5.00
   0  -2 -13  -12.10   14.90
   0  -2 -13    5.10   12.80
   0   1  13    5.20    5.50
   0   1  13  -12.70   15.10
   0   1  13  -14.00    8.40
   0   1  13   -3.10   14.60
   0   1  13    5.30    5.40
   0   1  13  -11.20    4.80
   0   1  13   -5.30    4.30
   0  -1 -13    1.40    8.90
   0  -1 -13    4.00    4.90
   0  -1 -13   -8.30    9.30
   0  -1 -13   -9.60   12.70
   0  -1 -13    9.20    6.70
   0   0  13   24.80   19.30
   0   0  13  -12.30   14.50
   0   0  13   13.20    9.20
   0   0  13    3.50    4.60
   0   0  13    8.80    5.60
   0   0  13    2.70    5.40
   0   0  13  -12.10    7.30
   0   0 -13   -0.80    2.00
   0   0 -13   -9.50   14.30
   0   0 -13   14.90    7.20
   0   0 -13   -1.40   10.10
   0   0 -13    0.30   17.70
   0  -1  13   -4.70    6.90
   0  -1  13    1.20    6.40
   0  -1  13   10.10   16.60
   0  -1  13    2.50    4.40
   0  -1  13    1.20    5.70
   0  -1  13   -3.20   14.20
   0  -1  13   -1.80    3.40
   0  -1  13   -0.50    5.40
   0   1 -13    0.50    3.80
   0   1 -13    1.30   18.50
   0   1 -13   12.50   12.40
   0   1 -13    0.30    5.40
   0   1 -13    4.80   17.30
   0  -2  13    4.80    4.60
   0  -2  13    3.70    5.50
   0  -2  13   10.10   16.20
   0  -2  13   -7.10    5.00
   0  -2  13   -3.40    3.50
   0  -2  13    2.80    5.60
   0  -2  13   21.30   18.10
   0  -2  13    5.50   10.30
   0   2 -13   -0.50    4.80
   0   2 -13  -16.30   15.10
   0   2 -13    7.30    5.70
   0   2 -13    1.70   11.80
   0  -3  13   -2.80    3.50
   0  -3  13    1.60    4.70
   0  -3  13   -5.30    5.00
   0  -3  13  -10.40   13.10
   0  -3  13    0.60    4.30
   0  -3  13   -3.00    3.00
   0  -3  13    5.60   16.70
   0  -3  13   -3.00    4.70
   0  -3  13   -4.30    7.20
   0   3 -13  -11.50    8.30
   0   3 -13   -6.70    4.80
   0   3 -13   -4.70    3.80
   0  -4  13    0.70    3.20
   0  -4  13   -4.30   16.10
   0  -4  13    1.40    2.50
   0  -4  13   -1.80    7.10
   0  -4  13    2.20    5.30
   0  -4  13    3.30   16.00
   0  -4  13   -1.40    3.40
   0  -4  13    3.20    3.20
   0  -4  13   -3.80    4.80
   0   4 -13    1.10    4.50
   0   4 -13   -4.70   10.50
   0   4 -13    4.50    6.30
   0  -5  13   -5.50   14.90
   0  -5  13   -2.70    1.50
   0  -5  13    2.40    5.10
   0  -5  13   -2.30    4.50
   0  -5  13   -1.30    1.80
   0  -5  13   -6.40   13.50
   0   5 -13   -0.50    5.90
   0   5 -13   -2.20    4.50
   0   5 -13   20.40   14.50
   0  -6  13   -2.30    4.70
   0  -6  13   -7.20   14.60
   0  -6  13   -2.40    3.30
   0  -6  13    1.70   13.50
   0   6 -13    4.30    6.30
   0   6 -13    3.20   11.50
   0   6 -13   -3.40    4.50
   0  -7  13   -4.50   12.70
   0  -7  13   -3.70    1.80
   0  -7  13    2.90    4.90
   0  -7  13   -2.30   14.30
   0  -7  13    9.20    6.30
   0   7 -13    2.70   10.00
   0   7 -13    6.60    6.70
   0  -8  13   -0.20    5.50
   0  -8  13    1.20    4.60
   0  -8  13  -11.60    9.40
   0  -8  13   -5.80   12.30
   0   8 -13    5.00    7.20
   0   8 -13   -2.10   10.70
   0  -9  13    7.00   12.60
   0  -9  13   -3.00   13.20
   0  -9  13   -3.00    4.90
   0   9 -13   -5.00    5.70
   0 -10  13    7.60    5.10
   0 -10  13   -0.40   10.10
   0  10 -13    2.50    6.90
   0 -11  13   -3.10    2.40
   0 -11  13    0.10    7.50
   0 -11  13    9.20    8.70
   0  11 -13   -3.60    6.70
   0  12 -13    1.60    7.90
   0  13 -13  -12.10    6.70
   0  14 -13   -9.90    7.40
   0  16  14  142.69   27.10
   0  16  14  151.78   39.60
   0 -16 -14  186.08   41.50
   0 -16 -14  181.48   27.50
   0 -16 -14  136.09   25.50
   0  15  14    6.10   10.20
   0  15  14   17.90   18.60
   0 -15 -14   -2.30   16.90
   0 -15 -14   27.30   21.70
   0 -15 -14  -18.30   17.80
   0  14  14  266.17   41.30
   0  14  14  233.68   31.50
   0 -14 -14  178.08   44.30
   0 -14 -14  183.08   43.20
   0 -14 -14  163.88   37.20
   0  13  14  356.46   37.80
   0  13  14  219.88   39.70
   0 -13 -14  386.86   64.39
   0 -13 -14  241.88   44.60
   0 -13 -14  246.08   56.79
   0  12  14   59.79   21.80
   0  12  14   75.69   17.80
   0 -12 -14   52.19   31.50
   0 -12 -14   62.89   33.50
   0 -12 -14  107.89   29.70
   0  11  14  281.87   40.90
   0  11  14  268.67   32.50
   0 -11 -14  300.07   60.99
   0 -11 -14  238.48   56.09
   0 -11 -14  261.07   42.90
   0  10  14  914.41   65.29
   0  10  14  855.81   72.09
   0 -10 -14  868.61  107.39
   0 -10 -14  947.61  114.29
   0 -10 -14  797.22   74.49
   0   9  14  191.28   27.40
   0   9  14  167.98   23.90
   0   9  14  220.08   42.70
   0   9  14  177.78   30.70
   0  -9 -14  316.57   59.09
   0  -9 -14  194.98   50.79
   0  -9 -14  157.68   31.90
   0   8  14   84.89   21.90
   0   8  14   75.19   15.30
   0   8  14   78.89   17.80
   0   8  14   71.49   25.60
   0  -8 -14   82.79   36.00
   0  -8 -14  103.69   23.90
   0  -8 -14   90.09   36.20
   0   7  14  973.10   68.99
   0   7  14  891.41   74.59
   0   7  14  984.00   71.09
   0   7  14  967.60   86.89
   0   7  14  981.30   70.49
   0  -7 -14  947.51  115.19
   0  -7 -14  950.80  113.19
   0   6  14 1285.87   88.89
   0   6  14 1423.86   95.89
   0   6  14 1429.86  108.39
   0   6  14 1309.67   89.69
   0   6  14 1227.18   87.09
   0  -6 -14 1171.28  116.59
   0  -6 -14 1011.60  126.09
   0  -6 -14 1294.57   99.39
   0   5  14  218.98   32.80
   0   5  14  203.78   39.20
   0   5  14  288.97   31.00
   0   5  14  279.17   30.30
   0   5  14  194.18   25.00
   0  -5 -14  235.38   37.60
   0  -5 -14  128.89   43.10
   0  -5 -14  224.68   51.09
   0   4  14 1027.80   67.99
   0   4  14 1003.30   83.99
   0   4  14  874.51   66.99
   0   4  14 1018.60   73.39
   0   4  14  902.71   65.39
   0   4  14  999.20  120.09
   0   4  14 1122.99  100.39
   0  -4 -14  832.12   63.99
   0  -4 -14  997.40  111.99
   0  -4 -14  894.61  109.19
   0  -4 -14  879.21   66.09
   0  -4 -14  903.21   79.49
   0   3  14 1525.05   94.59
   0   3  14 1391.46   98.49
   0   3  14 1312.67  120.29
   0   3  14 1397.26  122.49
   0   3  14 1365.86   92.39
   0   3  14 1382.06  109.09
   0   3  14 1378.16   94.59
   0  -3 -14 1350.66   93.29
   0  -3 -14 1394.46  125.99
   0  -3 -14 1307.37  120.69
   0  -3 -14 1328.97   92.19
   0  -3 -14 1473.75  109.39
   0   2  14  457.05   67.59
   0   2  14  329.07   33.60
   0   2  14  335.77   31.90
   0   2  14  392.86   33.80
   0   2  14  337.67   40.80
   0   2  14  346.37   49.00
   0   2  14  516.45   71.39
   0  -2 -14  488.85   36.30
   0  -2 -14  601.54   79.39
   0  -2 -14  459.35   55.59
   0  -2 -14  406.36   34.30
   0  -2 -14  472.35   72.69
   0   1  14  563.84   44.40
   0   1  14  570.94   46.70
   0   1  14  659.73   82.99
   0   1  14  563.14   49.10
   0   1  14  627.34   79.89
   0   1  14  613.34   58.69
   0   1  14  656.83   46.80
   0  -1 -14  897.31   95.19
   0  -1 -14  590.84   46.20
   0  -1 -14  549.15   46.00
   0  -1 -14  603.94   67.89
   0   0  14 1568.34  126.49
   0   0  14 1449.95   98.99
   0   0  14 1494.75  109.39
   0   0  14 1499.75   97.59
   0   0  14 1530.35   96.09
   0   0  14 1501.95   94.69
   0   0  14 1462.15  123.19
   0   0 -14 1339.07  123.49
   0   0 -14 1309.77   96.09
   0   0 -14 1254.87  108.69
   0   0 -14 1382.56  122.79
   0  -1  14  554.94   46.40
   0  -1  14  621.04   81.49
   0  -1  14  587.84   43.40
   0  -1  14  563.14   46.80
   0  -1  14  560.44   55.19
   0  -1  14  597.84   79.39
   0  -1  14  534.65   45.60
   0  -1  14  630.64   45.20
   0   1 -14  604.84   46.00
   0   1 -14  631.94   81.69
   0   1 -14  832.32   91.49
   0   1 -14  617.14   47.40
   0   1 -14  626.54   60.89
   0  -2  14  330.17   43.60
   0  -2  14  359.36   58.69
   0  -2  14  409.56   34.10
   0  -2  14  296.77   31.70
   0  -2  14  395.36   61.59
   0  -2  14  405.86   34.50
   0  -2  14  365.66   31.60
   0  -2  14  389.16   30.70
   0   2 -14  471.95   36.60
   0   2 -14  514.05   36.20
   0   2 -14  437.76   53.39
   0  -3  14 1227.08  114.69
   0  -3  14 1401.06   88.09
   0  -3  14 1403.26   93.19
   0  -3  14 1389.16   86.29
   0  -3  14 1326.37   91.19
   0  -3  14 1427.76   88.69
   0  -3  14 1432.26  100.19
   0  -3  14 1278.77  115.19
   0  -3  14 1368.86   89.29
   0   3 -14 1357.46  106.19
   0   3 -14 1247.58   91.79
   0   3 -14 1266.57   90.29
   0  -4  14  955.70   66.19
   0  -4  14 1017.40   93.39
   0  -4  14  944.41   58.19
   0  -4  14  962.10   61.29
   0  -4  14  918.41   65.19
   0  -4  14  960.60   72.59
   0  -4  14  938.21   59.79
   0  -4  14  998.20   62.19
   0  -4  14  888.41   89.29
   0   4 -14  858.51   78.79
   0   4 -14  878.11   65.09
   0   4 -14  736.93   64.99
   0  -5  14  191.38   42.00
   0  -5  14  189.68   41.70
   0  -5  14  228.68   25.70
   0  -5  14  202.58   16.00
   0  -5  14  197.38   15.70
   0  -5  14  231.98   24.20
   0   5 -14  252.57   27.00
   0   5 -14  229.58   27.20
   0   5 -14  276.67   40.50
   0  -6  14 1217.08   81.69
   0  -6  14 1180.38   78.09
   0  -6  14 1134.59  103.79
   0  -6  14 1261.27  106.89
   0   6 -14 1261.07   97.59
   0   6 -14 1210.48   82.09
   0   6 -14 1184.68   83.59
   0  -7  14  974.90   91.49
   0  -7  14 1079.69   70.59
   0  -7  14 1005.30   62.79
   0  -7  14 1124.59   94.69
   0  -7  14 1055.09   69.69
   0   7 -14  820.62   69.39
   0   7 -14  990.70   84.09
   0  -8  14   63.49   12.90
   0  -8  14   91.69   29.60
   0  -8  14   77.59   27.40
   0   8 -14   78.99   15.90
   0  -9  14  216.28   22.80
   0  -9  14  158.98   34.70
   0  -9  14  172.08   35.60
   0   9 -14  218.18   26.70
   0 -10  14  869.31   58.09
   0 -10  14  890.11   74.79
   0  10 -14  815.22   62.59
   0 -11  14  283.37   21.30
   0 -11  14  233.68   32.30
   0 -11  14  256.57   33.50
   0  11 -14  326.97   33.90
   0  12 -14   82.39   17.40
   0  13 -14  251.97   30.90
   0  14 -14  244.38   30.80
   0  16  15    4.90   12.70
   0 -16 -15  -11.10   15.50
   0 -16 -15  -10.60   17.80
   0 -16 -15    0.50   16.20
   0  15  15   -3.30   10.20
   0  15  15   34.30   21.40
   0 -15 -15   -3.50   22.30
   0 -15 -15   -1.50   17.60
   0 -15 -15   -0.60   18.80
   0  14  15   -5.00   14.70
   0  14  15    8.20   10.60
   0 -14 -15    1.20   15.80
   0 -14 -15   19.60   24.70
   0 -14 -15    0.70   22.70
   0  13  15   12.90   10.30
   0  13  15  -10.30   14.50
   0 -13 -15   -5.40   20.40
   0 -13 -15  -19.70   22.40
   0 -13 -15    1.60   15.20
   0  12  15    2.90    8.80
   0  12  15   14.30   16.40
   0 -12 -15   21.50   25.50
   0 -12 -15    2.60   15.70
   0 -12 -15  -13.40   22.30
   0  11  15    3.40    7.80
   0  11  15  -14.20    9.60
   0 -11 -15    3.80   24.20
   0 -11 -15    0.50   13.40
   0 -11 -15   30.50   29.10
   0  10  15    4.00    7.30
   0  10  15    2.30   13.70
   0 -10 -15    2.70   23.70
   0 -10 -15    9.00   13.80
   0 -10 -15  -15.80   17.50
   0   9  15   -2.40    6.90
   0   9  15   -7.20    8.10
   0   9  15    3.00   11.80
   0  -9 -15  -12.10   21.50
   0  -9 -15   -9.60    9.90
   0  -9 -15  -17.50   17.90
   0   8  15   -0.10    6.00
   0   8  15   23.60   19.50
   0   8  15   -6.30   10.10
   0   8  15   -2.50    7.70
   0  -8 -15  -13.90   19.70
   0  -8 -15   28.20   27.50
   0   7  15   -2.60    7.10
   0   7  15    4.20   12.00
   0   7  15  -17.30   13.10
   0   7  15    1.40    7.10
   0  -7 -15   -9.40   19.70
   0  -7 -15   -3.90   18.10
   0   6  15   15.80   17.90
   0   6  15   10.60   11.20
   0   6  15    4.40    7.90
   0   6  15    9.90    7.40
   0   6  15    6.00    6.90
   0  -6 -15   17.50   15.30
   0  -6 -15  -25.10   16.40
   0  -6 -15    7.50   20.40
   0   5  15    0.60   14.40
   0   5  15   14.70    9.10
   0   5  15   -2.90   10.00
   0   5  15   -2.80    4.90
   0   5  15   -1.90    5.90
   0  -5 -15   24.80   25.30
   0  -5 -15  -16.70   17.70
   0  -5 -15    3.10   14.00
   0   4  15   -1.20    6.70
   0   4  15   -1.10    5.60
   0   4  15    2.00   10.40
   0   4  15   -3.20   20.30
   0   4  15    2.60    6.60
   0   4  15    9.30   14.70
   0  -4 -15   35.70   26.90
   0  -4 -15   -6.00    4.30
   0  -4 -15   12.70   14.80
   0  -4 -15    1.80    6.50
   0  -4 -15  -30.10   15.10
   0   3  15   26.90   23.30
   0   3  15    0.80    5.70
   0   3  15   -3.60    6.10
   0   3  15    6.50    6.60
   0   3  15  -11.40   16.10
   0   3  15    7.10   14.80
   0   3  15   -5.10    8.70
   0  -3 -15    9.70   15.70
   0  -3 -15   -1.30   19.30
   0  -3 -15   -1.70    5.90
   0  -3 -15   -1.60    5.60
   0  -3 -15   15.80   25.90
   0   2  15   17.90   21.30
   0   2  15   -4.50    5.90
   0   2  15    2.30   10.50
   0   2  15   -3.60   12.50
   0   2  15   -1.10    5.00
   0   2  15    4.80    5.70
   0   2  15    0.30   20.00
   0  -2 -15   -6.50   20.10
   0  -2 -15   -2.60    5.30
   0  -2 -15    6.50    7.40
   0  -2 -15  -13.30    9.30
   0  -2 -15   15.20   20.60
   0   1  15   -1.30   18.70
   0   1  15    4.60    8.70
   0   1  15    7.60    7.10
   0   1  15    0.80    5.50
   0   1  15   13.90   14.20
   0   1  15    0.90    5.50
   0   1  15    4.60   21.10
   0  -1 -15   -3.90    5.30
   0  -1 -15    0.00    5.40
   0  -1 -15   -4.10   11.80
   0  -1 -15   -4.20   12.00
   0  -1 -15  -13.60   15.10
   0   0  15   10.70   10.10
   0   0  15   24.50   14.10
   0   0  15   -9.50   16.50
   0   0  15   -7.50    3.80
   0   0  15    6.70    6.50
   0   0  15   22.80   24.80
   0   0  15   -2.10    5.90
   0   0 -15  -22.50   15.10
   0   0 -15    6.10    7.40
   0   0 -15   34.10   25.70
   0   0 -15   -1.20   12.10
   0   0 -15   -0.20    2.60
   0  -1  15    0.50    5.10
   0  -1  15    8.10    6.30
   0  -1  15  -14.80   17.40
   0  -1  15    3.50    7.50
   0  -1  15    9.70   12.50
   0  -1  15   -1.50    5.60
   0  -1  15   -8.20    4.40
   0  -1  15   -7.20   16.90
   0   1 -15    5.40    6.00
   0   1 -15   12.30   21.60
   0   1 -15   -2.20    6.60
   0   1 -15   19.10   22.00
   0   1 -15  -14.80   11.80
   0  -2  15   -5.20    4.70
   0  -2  15    3.20    4.90
   0  -2  15   10.30   20.90
   0  -2  15    9.50    6.50
   0  -2  15   -5.30    9.70
   0  -2  15   -3.30    5.30
   0  -2  15   -1.10    6.40
   0  -2  15  -10.80   19.30
   0   2 -15    8.10   14.10
   0   2 -15   10.80    8.50
   0   2 -15    1.50    6.00
   0  -3  15   -5.30    4.60
   0  -3  15    8.70    7.90
   0  -3  15   -1.00    5.50
   0  -3  15   -3.90    3.60
   0  -3  15   -9.50   16.90
   0  -3  15   -5.10    8.40
   0  -3  15    3.40    7.50
   0  -3  15   -3.40   17.30
   0  -3  15   -1.10    4.60
   0   3 -15   14.10    8.30
   0   3 -15    3.70    6.10
   0   3 -15    4.40   12.60
   0  -4  15   -7.60    7.10
   0  -4  15   -3.60    6.30
   0  -4  15   -5.20    3.40
   0  -4  15    2.50    4.50
   0  -4  15   -5.20   17.00
   0  -4  15   16.10   20.70
   0  -4  15    0.60    4.30
   0  -4  15   -0.80    3.10
   0  -4  15    1.90    7.20
   0   4 -15   -6.30    4.60
   0   4 -15   12.30   15.20
   0   4 -15    0.30    7.70
   0  -5  15   13.50   18.40
   0  -5  15   -2.70    3.00
   0  -5  15  -15.70   14.10
   0  -5  15   -3.20    5.00
   0  -5  15    1.70    3.10
   0  -5  15    3.70    6.70
   0   5 -15   -2.20    5.80
   0   5 -15    1.00   13.80
   0   5 -15   -1.80    5.40
   0  -6  15    2.00   15.90
   0  -6  15  -15.20   11.80
   0  -6  15    9.90    7.50
   0  -6  15    1.50    5.60
   0   6 -15   -6.40    5.30
   0   6 -15  -20.30    9.60
   0   6 -15   -0.20    6.40
   0  -7  15   -2.90   13.60
   0  -7  15  -14.90   12.70
   0  -7  15   -0.10    6.50
   0   7 -15   12.80    9.90
   0   7 -15  -21.00   17.00
   0  -8  15   -4.60    5.50
   0  -8  15   -5.40   14.40
   0  -8  15    4.00   15.00
   0   8 -15    3.20    7.90
   0  -9  15    4.60   15.30
   0  -9  15   -4.40    5.80
   0  -9  15   -0.40   14.80
   0   9 -15    1.70    7.60
   0 -10  15   -9.80   12.70
   0 -10  15    9.10    6.40
   0 -10  15   -4.30   14.40
   0  10 -15   17.00    9.60
   0 -11  15    4.30   11.50
   0 -11  15   -0.50   10.90
   0 -11  15   -4.30    4.70
   0  11 -15    1.10    9.00
   0  12 -15    3.70    9.10
   0  13 -15   -9.00    7.90
   0  14 -15    2.10   10.10
   0  15 -15   -6.00    9.80
   0 -16 -16  262.37   46.00
   0 -16 -16  172.38   39.50
   0 -16 -16  217.98   46.40
   0  15  16   26.50   14.30
   0  15  16   44.90   24.50
   0 -15 -16   23.90   23.40
   0 -15 -16   -6.60   23.60
   0 -15 -16   24.80   26.50
   0  14  16  154.78   26.80
   0  14  16  201.28   40.20
   0 -14 -16  105.99   30.20
   0 -14 -16  103.89   38.80
   0 -14 -16  153.58   45.20
   0  13  16  520.85   46.90
   0  13  16  510.25   61.99
   0 -13 -16  419.26   62.99
   0 -13 -16  503.15   82.79
   0 -13 -16  498.55   82.69
   0  12  16   58.79   22.70
   0  12  16   42.50   14.30
   0 -12 -16   26.30   27.40
   0 -12 -16   41.20   19.00
   0 -12 -16   34.40   30.90
   0  11  16  220.08   37.70
   0  11  16  196.38   28.80
   0 -11 -16  131.99   32.20
   0 -11 -16  110.99   47.00
   0 -11 -16  121.39   44.90
   0  10  16 1016.10   79.59
   0  10  16 1156.58   90.69
   0 -10 -16 1291.67  140.79
   0 -10 -16 1171.18   94.09
   0 -10 -16 1007.80  130.19
   0   9  16  174.08   31.60
   0   9  16   92.99   19.10
   0  -9 -16  177.68   50.19
   0  -9 -16  134.79   29.60
   0  -9 -16   88.39   37.40
   0   8  16   43.00   23.70
   0   8  16   42.50   14.80
   0   8  16   12.00    9.40
   0   8  16   51.59   20.20
   0  -8 -16   -0.70   27.70
   0  -8 -16   25.20   29.30
   0   7  16  572.74   49.40
   0   7  16  550.84   47.20
   0   7  16  575.84   74.29
   0   7  16  528.05   60.79
   0  -7 -16  743.23  102.89
   0  -7 -16  788.32  101.99
   0   6  16  560.84   57.59
   0   6  16  842.42   76.69
   0   6  16  686.83   55.59
   0   6  16  688.73   53.49
   0  -6 -16  801.82  106.69
   0  -6 -16  632.34   96.29
   0   5  16   69.99   16.30
   0   5  16   75.49   28.70
   0   5  16   88.49   18.10
   0   5  16   81.29   16.80
   0   5  16   41.10   17.10
   0  -5 -16   50.59   22.60
   0  -5 -16   66.99   36.60
   0  -5 -16  146.29   44.80
   0   4  16 1166.48   88.29
   0   4  16 1276.47   94.39
   0   4  16 1204.28   87.59
   0   4  16 1318.17  107.09
   0   4  16 1204.78   86.49
   0  -4 -16 1421.96  106.39
   0  -4 -16 1208.48   87.59
   0  -4 -16 1310.87  122.99
   0  -4 -16 1351.76   86.79
   0  -4 -16 1219.28  123.49
   0   3  16 2461.15  189.98
   0   3  16 2276.07  153.08
   0   3  16 2415.36  173.38
   0   3  16 2329.67  155.68
   0   3  16 2555.14  155.78
   0   3  16 2493.55  161.68
   0  -3 -16 2315.07  154.68
   0  -3 -16 2389.56  171.98
   0  -3 -16 2466.45  195.38
   0  -3 -16 2298.87  153.38
   0  -3 -16 2547.25  193.38
   0   2  16   -0.80   16.40
   0   2  16  106.49   28.10
   0   2  16   89.49   20.70
   0   2  16  112.19   19.70
   0   2  16   83.09   15.80
   0   2  16   74.49   14.90
   0   2  16  120.19   40.10
   0  -2 -16  109.99   19.20
   0  -2 -16  182.48   48.10
   0  -2 -16  170.78   22.90
   0  -2 -16  139.29   46.10
   0  -2 -16   65.99   26.10
   0   1  16 1006.20  110.69
   0   1  16  869.21   59.79
   0   1  16  782.42   60.29
   0   1  16  834.52   74.49
   0   1  16  774.52   62.89
   0   1  16  776.22   97.69
   0   1  16  790.22   57.39
   0  -1 -16  862.61  104.09
   0  -1 -16  769.32   59.09
   0  -1 -16  603.94   56.89
   0  -1 -16  821.72   76.19
   0   0  16  301.87   30.40
   0   0  16  232.08   30.20
   0   0  16  282.47   33.40
   0   0  16  278.67   34.80
   0   0  16  313.47   61.39
   0   0  16  244.18   28.50
   0   0  16  318.37   60.59
   0   0  16  293.87   44.70
   0   0 -16  264.67   32.00
   0   0 -16  194.98   27.70
   0   0 -16  306.27   49.20
   0   0 -16  371.16   65.39
   0   0 -16  343.67   64.49
   0  -1  16  796.72   58.59
   0  -1  16  848.82   57.99
   0  -1  16  855.91   61.99
   0  -1  16  735.43   96.69
   0  -1  16  854.01   72.79
   0  -1  16 1045.90   97.19
   0  -1  16  819.12   61.79
   0  -1  16  787.22   60.79
   0   1 -16  772.72   59.89
   0   1 -16  775.22   98.89
   0   1 -16  723.53   60.49
   0   1 -16  718.63   74.09
   0   1 -16  702.93   98.19
   0  -2  16   89.09   18.20
   0  -2  16   91.59   17.50
   0  -2  16   88.69   16.90
   0  -2  16   93.89   15.80
   0  -2  16   79.39   13.70
   0  -2  16   55.89   30.80
   0  -2  16   93.99   24.20
   0  -2  16   99.89   35.50
   0   2 -16  126.79   19.40
   0   2 -16  133.29   32.20
   0   2 -16   97.69   19.00
   0  -3  16 2303.97  151.48
   0  -3  16 2438.16  188.08
   0  -3  16 2519.85  156.38
   0  -3  16 2415.96  149.49
   0  -3  16 2393.06  165.08
   0  -3  16 2428.16  186.98
   0  -3  16 2328.17  151.18
   0  -3  16 2525.15  153.58
   0   3 -16 2609.64  176.08
   0   3 -16 2189.08  155.78
   0   3 -16 2488.95  155.78
   0  -4  16 1024.00   81.29
   0  -4  16 1091.99   89.19
   0  -4  16 1194.38   77.89
   0  -4  16 1145.69  110.29
   0  -4  16 1170.98   83.09
   0  -4  16 1145.39  111.09
   0  -4  16 1250.97   78.99
   0  -4  16 1150.58   76.49
   0   4 -16 1308.07   84.29
   0   4 -16 1270.97   85.99
   0   4 -16 1276.57  102.09
   0  -5  16  100.99   17.50
   0  -5  16   79.89   10.20
   0  -5  16  102.99   35.80
   0  -5  16   67.39    9.90
   0  -5  16   94.39   34.10
   0  -5  16   63.69   14.60
   0   5 -16  104.19   18.40
   0   5 -16   86.09   27.60
   0   5 -16   83.69   18.20
   0  -6  16  620.64   82.19
   0  -6  16  661.83   51.79
   0  -6  16  726.73   90.19
   0   6 -16  591.64   72.89
   0   6 -16  669.93   54.19
   0   6 -16  693.83   53.09
   0  -7  16  649.64   48.90
   0  -7  16  423.16   69.89
   0  -7  16  618.84   81.89
   0   7 -16  668.33   51.99
   0  -8  16   48.00   12.50
   0  -8  16   55.19   26.10
   0  -8  16   50.39   26.50
   0   8 -16   49.20   15.20
   0  -9  16  152.68   20.10
   0  -9  16  176.18   38.80
   0  -9  16  102.49   31.60
   0   9 -16  108.69   21.80
   0 -10  16 1151.78   73.29
   0 -10  16  947.51   92.39
   0 -10  16 1041.50   92.99
   0  10 -16 1042.60   78.49
   0 -11  16  203.48   21.10
   0 -11  16  200.78   35.00
   0 -11  16  164.48   32.70
   0  11 -16  220.98   30.30
   0 -12  16   62.09   14.20
   0 -12  16   39.20   12.00
   0  12 -16   58.89   16.70
   0  13 -16  484.15   45.10
   0  14 -16  161.28   26.40
   0  15 -16   28.60   14.80
   0 -16 -17   22.40   25.60
   0 -16 -17   -9.30   19.50
   0  15  17    9.40   12.00
   0 -15 -17   -8.00   17.70
   0 -15 -17  -26.00   21.30
   0 -15 -17    0.00   26.00
   0  14  17    6.90   11.90
   0  14  17    0.10   15.60
   0 -14 -17  -16.70   22.20
   0 -14 -17    1.40   18.30
   0 -14 -17   45.90   33.40
   0  13  17   -0.40    9.30
   0  13  17   15.50   17.80
   0 -13 -17    0.40   27.70
   0 -13 -17   11.30   19.90
   0 -13 -17    0.00   26.70
   0  12  17   -0.60    9.20
   0  12  17   12.10   17.00
   0 -12 -17   14.00   28.50
   0 -12 -17   11.40   15.80
   0 -12 -17    2.20   28.60
   0  11  17   17.20   11.40
   0  11  17  -10.10   11.80
   0 -11 -17   -8.10   13.10
   0 -11 -17  -14.60   24.00
   0 -11 -17   -5.30   26.90
   0  10  17    1.50   13.80
   0  10  17    1.80    8.30
   0 -10 -17   -1.00   13.20
   0 -10 -17  -10.00   26.60
   0 -10 -17  -12.50   26.70
   0   9  17   -1.70   12.80
   0   9  17  -17.50    5.10
   0  -9 -17    2.20   25.70
   0  -9 -17    0.50   28.00
   0  -9 -17   -5.20    6.70
   0   8  17   13.80   22.40
   0   8  17  -14.10    9.20
   0   8  17   -3.80    7.10
   0   8  17    1.00    9.00
   0  -8 -17   -6.80   27.50
   0  -8 -17   17.30   27.80
   0   7  17   -0.60    7.80
   0   7  17   -0.60   15.30
   0   7  17   -1.70   11.60
   0   7  17   -4.90    7.00
   0  -7 -17   -5.00   22.70
   0  -7 -17    4.70   25.90
   0   6  17   -3.00   11.70
   0   6  17   -9.20    6.40
   0   6  17   -2.40   16.40
   0   6  17   -6.20    6.10
   0  -6 -17   11.50   24.30
   0  -6 -17   34.00   31.40
   0   5  17   -2.30   12.40
   0   5  17    5.60    7.90
   0   5  17   -7.90    7.00
   0   5  17   -6.80   14.20
   0  -5 -17    3.10   23.30
   0  -5 -17   10.00   27.40
   0   4  17   -8.40    9.70
   0   4  17   12.30    8.60
   0   4  17    4.20   15.70
   0   4  17    5.80    7.30
   0   4  17   14.10    8.60
   0  -4 -17   18.90   27.10
   0  -4 -17   -4.60   13.00
   0  -4 -17    4.50    6.60
   0  -4 -17    3.00   26.50
   0  -4 -17    8.30    8.40
   0   3  17   11.60    8.40
   0   3  17    9.10    9.80
   0   3  17   -4.10   13.00
   0   3  17   16.40   11.50
   0   3  17   13.80    8.10
   0  -3 -17    2.10   13.70
   0  -3 -17   30.30   29.40
   0  -3 -17   -3.30    6.00
   0  -3 -17   -3.20    8.20
   0  -3 -17   -5.60   19.50
   0   2  17   -4.10    5.20
   0   2  17  -10.20    4.70
   0   2  17    1.00   10.60
   0   2  17  -10.40   12.40
   0   2  17   10.50    9.40
   0   2  17   -0.30   14.60
   0  -2 -17    2.60    7.80
   0  -2 -17  -14.60   13.80
   0  -2 -17  -17.10   21.40
   0  -2 -17   -0.70    6.40
   0  -2 -17   41.90   33.70
   0   1  17    8.20   14.10
   0   1  17  -16.40   17.90
   0   1  17    6.70    7.70
   0   1  17   -4.00   22.40
   0   1  17   -6.80    9.30
   0   1  17   -8.80    4.40
   0   1  17   -1.60    7.50
   0  -1 -17    9.90   17.80
   0  -1 -17   -7.20    7.10
   0  -1 -17   -3.70    5.40
   0  -1 -17    8.60   16.50
   0   0  17   -1.90    5.60
   0   0  17  -39.30   13.20
   0   0  17   -1.40    6.20
   0   0  17    7.00   10.80
   0   0  17    3.10    8.60
   0   0  17   -4.80   12.40
   0   0  17   -7.20    5.70
   0   0  17  -24.60   16.50
   0   0 -17   -3.50   15.30
   0   0 -17    3.80    8.30
   0   0 -17    4.30    6.50
   0   0 -17   11.50   25.70
   0  -1  17    6.00   23.00
   0  -1  17    7.10   23.20
   0  -1  17   -0.50    6.20
   0  -1  17    7.80    9.30
   0  -1  17   -0.30    8.80
   0  -1  17   -5.00   10.90
   0  -1  17   -5.90    6.10
   0  -1  17    6.40    6.50
   0   1 -17  -16.80   13.90
   0   1 -17    2.40    7.10
   0   1 -17    3.90    8.30
   0  -2  17    4.90   11.30
   0  -2  17   -0.80    5.60
   0  -2  17   -1.90    7.60
   0  -2  17   17.40   24.70
   0  -2  17  -13.00   17.40
   0  -2  17  -17.30    5.40
   0  -2  17    4.00    6.00
   0  -2  17   -4.80    5.80
   0   2 -17   -1.30    6.30
   0   2 -17   -3.50    8.30
   0   2 -17   -3.70   14.80
   0  -3  17    6.20    7.30
   0  -3  17    7.00    6.50
   0  -3  17   10.60   12.20
   0  -3  17    7.10   20.30
   0  -3  17    4.10    7.10
   0  -3  17   -6.80    4.60
   0  -3  17   -0.60    7.30
   0  -3  17   -5.10   19.50
   0   3 -17    1.30    6.80
   0   3 -17   -4.10   14.40
   0   3 -17   -1.50    6.90
   0  -4  17    7.60    5.60
   0  -4  17   -2.20    7.30
   0  -4  17    5.70    8.20
   0  -4  17   -4.50    5.10
   0  -4  17  -39.60   12.20
   0  -4  17   11.20   22.90
   0  -4  17   -5.00    4.70
   0   4 -17    0.50    8.20
   0   4 -17    4.10    7.80
   0   4 -17   10.40   15.00
   0  -5  17    9.00    8.10
   0  -5  17   -4.20    2.90
   0  -5  17    2.80   20.10
   0  -5  17   27.90   26.40
   0  -5  17    0.40    3.80
   0   5 -17   -3.70   14.80
   0   5 -17   -5.50    6.30
   0   5 -17   -1.20    6.80
   0  -6  17   -1.20    8.00
   0  -6  17   -3.40   18.00
   0  -6  17    2.90   20.20
   0   6 -17    2.20    8.70
   0   6 -17   -3.30    6.60
   0  -7  17   -7.50    6.50
   0  -7  17   -3.80   17.30
   0  -7  17   -4.30   18.20
   0   7 -17   18.40   11.40
   0  -8  17    7.10    7.90
   0  -8  17    5.70   20.20
   0  -8  17    3.20   17.40
   0   8 -17   -3.90    7.60
   0  -9  17    9.70   18.40
   0  -9  17    0.90    7.00
   0  -9  17  -10.70   15.80
   0   9 -17    2.60    9.30
   0 -10  17    1.90   16.40
   0 -10  17   -3.50   15.80
   0 -10  17    1.40    6.90
   0  10 -17   -4.80    8.70
   0 -11  17   -7.80    5.60
   0 -11  17    2.60   14.00
   0  11 -17  -10.10    8.90
   0 -12  17  -13.50    9.20
   0 -12  17   -9.80   10.40
   0  12 -17    0.30   10.90
   0  13 -17    0.80   11.10
   0  14 -17   -3.40   12.50
   0  15 -17   -3.10   12.40
   0 -15 -18   27.60   22.40
   0 -15 -18    9.00   26.50
   0 -15 -18   30.10   31.30
   0  14  18   52.79   18.90
   0  14  18   46.50   29.00
   0 -14 -18   55.79   39.50
   0 -14 -18   60.09   36.30
   0 -14 -18   35.80   25.80
   0  13  18  489.55   52.69
   0  13  18  418.26   60.39
   0 -13 -18  466.95   85.89
   0 -13 -18  346.27   74.79
   0 -13 -18  481.95   67.09
   0  12  18    4.90   18.90
   0  12  18   29.40   14.00
   0 -12 -18   21.60   35.50
   0 -12 -18    2.80   31.20
   0 -12 -18    8.90   18.80
   0  11  18  271.77   36.50
   0  11  18  244.28   43.90
   0 -11 -18  226.68   42.80
   0 -11 -18  180.98   58.59
   0 -11 -18  245.38   68.59
   0  10  18 1017.20   79.19
   0  10  18 1084.59   90.49
   0 -10 -18 1178.38  142.99
   0 -10 -18 1097.19  136.09
   0 -10 -18  971.30   89.79
   0   9  18  248.48   41.90
   0   9  18  226.08   31.40
   0  -9 -18  205.48   38.90
   0  -9 -18  141.09   50.99
   0  -9 -18  260.07   67.39
   0   8  18   18.70   13.90
   0   8  18   21.80   17.50
   0   8  18   40.50   14.20
   0  -8 -18   83.49   43.50
   0  -8 -18   12.40   29.40
   0   7  18  529.25   73.79
   0   7  18  481.95   59.79
   0   7  18  479.65   45.80
   0   7  18  582.74   49.90
   0  -7 -18  667.03  101.29
   0  -7 -18  625.94  100.99
   0   6  18  469.45   44.50
   0   6  18  462.75   67.39
   0   6  18  432.16   54.99
   0   6  18  479.75   42.70
   0  -6 -18  534.65   90.69
   0   5  18   25.80   16.50
   0   5  18   38.40   13.10
   0   5  18   44.60   25.20
   0   5  18   44.60   14.30
   0  -5 -18   58.59   37.40
   0   4  18  314.37   42.30
   0   4  18  206.98   28.60
   0   4  18  238.28   45.80
   0   4  18  228.68   32.00
   0  -4 -18  248.18   66.29
   0  -4 -18  226.18   29.90
   0  -4 -18  259.07   64.79
   0  -4 -18  205.68   28.10
   0   3  18 2304.47  151.38
   0   3  18 2358.36  154.68
   0   3  18 2338.97  159.38
   0   3  18 2519.35  154.28
   0   3  18 2163.98  170.38
   0  -3 -18 2248.97  151.48
   0  -3 -18 2238.88  171.58
   0  -3 -18 2351.86  153.68
   0  -3 -18 2362.46  197.78
   0   2  18   65.09   18.00
   0   2  18  118.49   20.30
   0   2  18   90.99   28.00
   0   2  18  107.39   25.10
   0   2  18  113.99   20.90
   0  -2 -18  138.79   22.50
   0  -2 -18  153.38   23.40
   0  -2 -18  121.69   34.20
   0   1  18  188.98   28.90
   0   1  18  247.38   58.99
   0   1  18  231.18   27.10
   0   1  18  192.58   28.00
   0   1  18  227.48   41.20
   0   1  18  197.28   30.90
   0   1  18  168.68   24.60
   0  -1 -18  122.69   34.90
   0  -1 -18  144.39   24.40
   0  -1 -18  121.69   23.00
   0   0  18  922.41   88.19
   0   0  18 1067.09   79.09
   0   0  18 1029.70   75.39
   0   0  18 1059.79   74.29
   0   0  18 1225.28  135.79
   0   0  18 1146.49  132.99
   0   0  18  945.21   77.99
   0   0  18  991.40   77.19
   0   0 -18 1131.69   97.99
   0   0 -18 1225.38   79.39
   0   0 -18  979.00   76.99
   0  -1  18  189.68   36.20
   0  -1  18  180.48   26.70
   0  -1  18  189.48   51.59
   0  -1  18  175.78   27.50
   0  -1  18  231.38   25.60
   0  -1  18  255.87   57.29
   0  -1  18  210.08   27.90
   0  -1  18  190.88   24.90
   0   1 -18   89.39   20.50
   0   1 -18   81.59   29.50
   0  -2  18  104.89   27.40
   0  -2  18  160.98   23.80
   0  -2  18   90.09   37.70
   0  -2  18  142.79   22.90
   0  -2  18   98.59   16.40
   0  -2  18   96.89   17.50
   0  -2  18  141.49   45.60
   0  -2  18  105.29   19.00
   0   2 -18  101.09   30.90
   0   2 -18   88.29   20.00
   0   2 -18  131.09   21.90
   0  -3  18 2339.77  153.18
   0  -3  18 2440.96  157.08
   0  -3  18 2341.17  152.08
   0  -3  18 2357.66  149.29
   0  -3  18 2332.87  190.88
   0  -3  18 2387.76  151.78
   0  -3  18 2260.47  165.98
   0  -3  18 2442.26  193.18
   0   3 -18 2604.04  157.88
   0   3 -18 2304.17  157.58
   0   3 -18 2537.25  179.28
   0  -4  18  229.18   24.50
   0  -4  18  227.78   30.00
   0  -4  18  208.58   52.39
   0  -4  18  226.28   55.09
   0  -4  18  209.18   24.10
   0   4 -18  171.28   28.80
   0   4 -18  284.87   41.00
   0   4 -18  255.57   46.70
   0  -5  18   69.99   32.30
   0  -5  18   17.10   27.00
   0  -5  18   35.80    8.10
   0  -5  18   32.90   13.00
   0  -5  18   49.60    8.90
   0   5 -18   35.20   13.30
   0  -6  18  549.05   83.69
   0  -6  18  375.76   69.39
   0  -6  18  584.44   47.20
   0   6 -18  596.94   50.69
   0  -7  18  435.06   73.79
   0  -7  18  609.04   48.50
   0  -7  18  687.53   90.89
   0   7 -18  567.04   51.09
   0  -8  18   36.10   29.10
   0  -8  18   12.30   22.40
   0  -8  18   39.10   13.00
   0   8 -18   29.80   14.80
   0  -9  18  245.98   28.80
   0  -9  18  153.18   42.80
   0  -9  18  258.47   51.19
   0   9 -18  246.78   34.00
   0 -10  18 1006.60   68.69
   0 -10  18 1038.10   94.89
   0 -10  18  734.43   95.29
   0  10 -18  948.21   74.69
   0 -11  18  301.97   25.30
   0 -11  18  170.88   38.90
   0  11 -18  168.78   30.10
   0 -12  18   14.70   15.10
   0 -12  18   35.80   16.60
   0  12 -18   23.80   13.70
   0  13 -18  505.75   55.39
   0  14 -18   56.29   18.70
   0  15 -18   37.90   16.40
   0 -15 -19  -13.10   27.80
   0 -15 -19   -1.70   29.20
   0  14  19   18.20   14.80
   0 -14 -19   25.70   33.90
   0 -14 -19    4.10   18.90
   0 -14 -19  -11.40   27.70
   0  13  19   23.10   20.00
   0  13  19  -12.30    9.70
   0 -13 -19   13.40   20.00
   0 -13 -19   20.20   36.80
   0 -13 -19    0.10   32.30
   0  12  19    9.90   11.80
   0  12  19   35.10   22.40
   0 -12 -19   -1.50   31.50
   0 -12 -19    3.90   14.00
   0 -12 -19   -5.70   29.10
   0  11  19   -8.50   15.00
   0  11  19   -3.90    9.00
   0 -11 -19  -18.60   29.90
   0 -11 -19  -25.50   28.20
   0 -11 -19    0.50   14.90
   0  10  19    2.70   10.90
   0  10  19   -9.70   13.50
   0 -10 -19  -13.70   32.10
   0 -10 -19   -7.70   13.80
   0   9  19    7.50   15.20
   0   9  19   11.30    9.90
   0  -9 -19  -14.50    6.50
   0  -9 -19  -11.10   30.00
   0   8  19  -16.20   11.00
   0   8  19    0.80   10.10
   0   8  19   -7.90    6.50
   0  -8 -19   27.10   28.30
   0   7  19    3.30   10.30
   0   7  19   16.10   16.30
   0   7  19  -24.50   16.00
   0   7  19    0.00    8.70
   0  -7 -19   10.60   21.90
   0   6  19    8.50   11.10
   0   6  19  -16.00   15.20
   0   6  19  -10.80    5.60
   0   6  19   -2.30   12.50
   0  -6 -19   18.20   29.30
   0   5  19    9.60   19.00
   0   5  19   15.10   12.10
   0   5  19   -8.10   12.80
   0   5  19   -7.90    5.50
   0   4  19   -1.20   12.60
   0   4  19   13.40   10.00
   0   4  19   -3.00    9.10
   0   4  19    0.90   14.80
   0  -4 -19    6.10    9.10
   0  -4 -19    0.70    7.60
   0   3  19   15.00   18.70
   0   3  19   14.00   10.10
   0   3  19   24.20   14.50
   0   3  19    4.30    7.60
   0  -3 -19    2.70    9.00
   0  -3 -19    3.20   17.30
   0  -3 -19    2.30    7.60
   0   2  19    1.30   11.20
   0   2  19    3.80    7.80
   0   2  19   -7.50    7.50
   0   2  19   15.40    9.30
   0   2  19   -5.10    8.00
   0   2  19    8.90   17.30
   0  -2 -19   -3.30    6.80
   0  -2 -19   -0.90   16.60
   0  -2 -19    5.90    9.80
   0   1  19   -5.60   10.00
   0   1  19    7.50   10.00
   0   1  19    2.70    7.50
   0   1  19    3.40    7.90
   0   1  19   -0.20    8.50
   0   1  19  -13.00   12.90
   0  -1 -19   -4.20    6.60
   0  -1 -19   23.90   21.10
   0  -1 -19   -3.50    7.80
   0   0  19    0.70    7.00
   0   0  19   -5.60    8.40
   0   0  19   -5.30   14.00
   0   0  19    6.40   11.40
   0   0  19    7.40    7.10
   0   0  19    6.90    9.30
   0   0  19  -29.90   17.70
   0   0 -19   10.90    9.60
   0   0 -19    6.30    8.10
   0   0 -19   -3.60   16.70
   0  -1  19    0.20    8.00
   0  -1  19   -1.50    6.70
   0  -1  19   -3.50   13.80
   0  -1  19   -9.70    7.30
   0  -1  19   -8.10    7.00
   0  -1  19    5.50    7.00
   0  -1  19   -8.40   21.90
   0   1 -19   12.20   11.50
   0   1 -19   25.50   20.20
   0   1 -19   -0.10    7.10
   0  -2  19    3.90    6.80
   0  -2  19    2.30    7.70
   0  -2  19    8.20   13.60
   0  -2  19   15.60   10.10
   0  -2  19   -6.60    6.70
   0  -2  19  -10.90   21.10
   0  -2  19    6.70    6.70
   0  -2  19  -34.70   18.40
   0   2 -19    7.10    9.70
   0   2 -19   57.49   25.60
   0  -3  19    3.00    7.30
   0  -3  19  -25.80   19.10
   0  -3  19    4.20   23.60
   0  -3  19   10.50    8.30
   0  -3  19   -3.10    7.40
   0  -3  19   -0.60    8.60
   0  -3  19    2.60    6.20
   0   3 -19   19.40   20.20
   0   3 -19   12.10   11.20
   0  -4  19   10.80   25.70
   0  -4  19   -4.10    5.30
   0  -4  19    2.00    5.40
   0  -4  19   -5.60    7.00
   0  -4  19    8.00   23.10
   0   4 -19   -5.40    8.00
   0  -5  19   -0.60    4.10
   0  -5  19  -11.80   22.40
   0  -5  19   -1.30   21.70
   0  -5  19    7.40    9.10
   0  -5  19   -2.70    4.10
   0   5 -19   -8.70    8.50
   0  -6  19   -9.00   21.80
   0  -6  19   13.80   10.50
   0  -6  19    2.60   21.60
   0   6 -19   -0.50    9.60
   0  -7  19  -10.70    7.30
   0  -7  19   19.10   24.70
   0  -7  19  -25.10   18.80
   0   7 -19    6.30   10.50
   0  -8  19    4.90   21.40
   0  -8  19    7.80    9.20
   0  -8  19   -5.00   20.70
   0   8 -19   -7.60    8.00
   0  -9  19   12.30   21.90
   0  -9  19    2.00    8.50
   0  -9  19   -2.60   20.50
   0   9 -19    2.10   10.10
   0 -10  19   -2.20   19.80
   0 -10  19    5.80   21.40
   0 -10  19   -0.40    8.10
   0  10 -19  -14.00    8.60
   0 -11  19   -6.30    6.90
   0 -11  19    2.50   17.80
   0  11 -19   -4.70    9.70
   0 -12  19   11.30   14.20
   0 -12  19    8.50   15.80
   0  12 -19   -5.10   10.40
   0  13 -19    0.10   11.70
   0  14 -19    6.70   13.30
   0 -15 -20   62.39   40.20
   0 -15 -20   -2.90   31.00
   0 -14 -20  126.59   36.80
   0 -14 -20  137.99   54.29
   0 -14 -20  102.99   48.80
   0  13  20  293.97   40.80
   0 -13 -20  286.57   52.59
   0 -13 -20  212.88   64.19
   0 -13 -20  216.48   67.29
   0  12  20   96.69   32.00
   0  12  20  117.99   24.60
   0 -12 -20   28.10   24.30
   0 -12 -20   53.19   47.00
   0  11  20   43.40   16.60
   0  11  20   79.09   27.90
   0 -11 -20   74.59   26.30
   0 -11 -20   76.89   49.00
   0  10  20  417.86   59.19
   0  10  20  432.26   48.80
   0 -10 -20  497.95   64.99
   0 -10 -20  199.48   65.99
   0   9  20  349.67   43.50
   0   9  20  320.67   51.99
   0  -9 -20  359.46   55.19
   0   8  20  106.59   24.40
   0   8  20  104.69   22.50
   0   8  20   62.49   25.00
   0   7  20  427.26   56.59
   0   7  20  370.86   43.60
   0   7  20  376.16   46.30
   0   6  20  406.46   46.20
   0   6  20  439.46   49.20
   0   6  20  405.26   55.79
   0   6  20  448.06   69.99
   0   5  20   18.90   18.20
   0   5  20   58.89   29.40
   0   5  20   46.40   15.50
   0   5  20   64.59   19.30
   0   4  20  638.64   71.69
   0   4  20  715.43   57.59
   0   4  20  937.61   97.29
   0   4  20  632.14   58.49
   0  -4 -20  706.53   56.39
   0  -4 -20  676.33   58.49
   0   3  20  881.41   72.19
   0   3  20  984.70   92.69
   0   3  20  874.31   69.19
   0   3  20  901.01   76.79
   0  -3 -20  893.81   69.99
   0  -3 -20  964.50   72.89
   0   2  20   93.99   19.80
   0   2  20  113.69   23.70
   0   2  20  137.79   35.70
   0   2  20  105.29   25.40
   0  -2 -20  134.79   24.20
   0  -2 -20  107.19   33.80
   0   1  20   65.59   18.40
   0   1  20  105.79   32.00
   0   1  20   85.09   21.70
   0   1  20  100.49   20.20
   0   1  20   94.49   18.50
   0   1  20   77.69   20.90
   0  -1 -20   75.89   31.80
   0  -1 -20   62.89   18.90
   0   0  20  115.69   32.10
   0   0  20   70.19   16.70
   0   0  20   82.39   19.90
   0   0  20   79.89   21.60
   0   0  20   80.59   17.20
   0   0  20   89.79   21.30
   0   0 -20   44.60   16.40
   0   0 -20   66.09   28.80
   0  -1  20   93.89   17.50
   0  -1  20   10.30   31.70
   0  -1  20  119.39   34.80
   0  -1  20   89.59   20.80
   0  -1  20  113.59   23.00
   0  -1  20   93.19   20.00
   0  -1  20  100.89   19.00
   0   1 -20   49.90   17.40
   0   1 -20   77.79   31.70
   0  -2  20   99.79   17.30
   0  -2  20  156.28   49.90
   0  -2  20  138.89   23.40
   0  -2  20  114.79   21.50
   0  -2  20   86.39   20.00
   0  -2  20  105.29   18.50
   0   2 -20  110.79   34.60
   0   2 -20   77.19   20.30
   0  -3  20  884.21   67.79
   0  -3  20  998.90   69.39
   0  -3  20 1009.00  125.29
   0  -3  20  865.81   71.29
   0  -3  20  910.91   66.89
   0  -3  20  891.51  122.59
   0   3 -20  963.20   74.79
   0  -4  20  660.33   49.60
   0  -4  20  549.54   94.19
   0  -4  20  737.73  105.09
   0  -4  20  629.34   54.79
   0  -4  20  664.93   48.90
   0   4 -20  621.74   56.49
   0  -5  20   44.20    9.40
   0  -5  20   37.10   31.80
   0  -5  20   62.89   11.00
   0  -5  20   45.90   15.40
   0  -5  20   37.50   28.30
   0   5 -20   17.50   12.10
   0  -6  20  471.25   79.59
   0  -6  20  460.65   82.19
   0  -6  20  453.95   47.20
   0   6 -20  378.36   46.90
   0  -7  20  307.47   67.29
   0  -7  20  497.15   43.50
   0  -7  20  554.94   87.29
   0   7 -20  460.45   52.19
   0  -8  20  126.19   22.00
   0  -8  20   50.19   30.20
   0  -8  20   29.30   28.40
   0   8 -20   78.89   20.60
   0  -9  20  382.46   67.89
   0  -9  20  269.87   57.89
   0  -9  20  396.16   39.20
   0   9 -20  245.88   38.20
   0 -10  20  502.55   42.30
   0 -10  20  397.96   66.89
   0 -10  20  427.26   73.69
   0  10 -20  464.05   53.49
   0 -11  20   41.70   12.70
   0 -11  20   73.49   29.30
   0  11 -20   87.99   22.70
   0 -12  20   65.99   24.40
   0 -12  20   68.89   25.10
   0  12 -20   81.79   22.60
   0  13 -20  187.38   34.30
   0  14 -20   50.29   20.10
   0 -14 -21   -4.10   50.19
   0 -14 -21   -3.70   34.70
   0 -13 -21   -0.60   18.10
   0 -13 -21   37.50   42.80
   0  12  21   20.50   26.50
   0  12  21    0.20   11.30
   0 -12 -21   -8.40   16.40
   0 -12 -21   -4.80   38.50
   0  11  21   22.30   21.20
   0  11  21    2.40   11.20
   0 -11 -21   -6.70   15.90
   0  10  21   23.40   20.50
   0  10  21   -8.00    8.40
   0 -10 -21    5.30   17.20
   0   9  21   19.10   13.00
   0   9  21    4.30   17.30
   0  -9 -21   -9.50   14.70
   0   8  21    0.90    9.30
   0   8  21    6.60   18.00
   0   7  21   -6.70    8.80
   0   7  21    9.90   18.20
   0   7  21    7.40   12.00
   0   6  21    0.70   20.20
   0   6  21    5.70   11.30
   0   6  21   -7.80   15.20
   0   6  21    4.40    9.50
   0   5  21    1.80    8.70
   0   5  21    4.30   11.30
   0   5  21    8.70   20.50
   0   5  21   -7.60   12.90
   0   4  21  -11.90   11.70
   0   4  21    4.00   10.20
   0   4  21    5.80    9.60
   0   4  21   12.40   19.80
   0  -4 -21   -7.50    7.50
   0  -4 -21   11.60    8.40
   0   3  21   -4.60   12.70
   0   3  21  -17.40    7.90
   0   3  21    3.60   18.20
   0   3  21   -7.30    8.40
   0  -3 -21   10.80   10.70
   0   2  21    3.50   13.20
   0   2  21   -0.60    8.00
   0   2  21   12.80   10.50
   0   2  21    2.30   17.60
   0  -2 -21    3.30   10.80
   0   1  21    4.00    7.40
   0   1  21  -11.00   11.40
   0   1  21   19.80   20.10
   0   1  21   11.60   11.70
   0  -1 -21   34.90   25.10
   0  -1 -21    1.50   10.00
   0   0  21   -4.10    6.50
   0   0  21  -12.40    9.10
   0   0  21    2.20    8.40
   0   0  21   16.30   11.70
   0   0  21   13.70   12.70
   0   0 -21   -6.30   18.00
   0   0 -21  -13.50    7.50
   0  -1  21    0.40    6.40
   0  -1  21    1.70    9.80
   0  -1  21   21.30   12.40
   0  -1  21    6.70    9.60
   0  -1  21    4.70    8.60
   0   1 -21    4.60   10.30
   0   1 -21   41.10   26.20
   0  -2  21   -4.90    8.70
   0  -2  21    5.20    8.90
   0  -2  21  -11.70    7.80
   0  -2  21    0.40    5.80
   0  -2  21   -5.80    6.30
   0   2 -21   -0.50   10.20
   0  -3  21    1.50    8.90
   0  -3  21   -3.20    6.20
   0  -3  21    4.10    8.00
   0  -3  21   -9.20   22.50
   0   3 -21   12.80   11.60
   0  -4  21   12.80   31.10
   0  -4  21    5.30    8.00
   0  -4  21    7.50   27.80
   0  -4  21   -5.20    8.90
   0  -4  21    3.50    6.40
   0   4 -21   13.70   11.10
   0  -5  21   -3.70    4.30
   0  -5  21   -2.60   27.30
   0  -5  21   -7.60   22.20
   0  -5  21   -6.50    4.50
   0  -5  21   -5.00    8.30
   0   5 -21    5.70   10.40
   0  -6  21  -10.70   22.40
   0  -6  21  -10.30    7.70
   0  -6  21  -15.10   21.00
   0   6 -21   10.50   12.50
   0  -7  21  -12.40    7.30
   0  -7  21  -22.20   21.50
   0  -7  21   -0.50   24.20
   0   7 -21   10.80   13.30
   0  -8  21    8.10   24.90
   0  -8  21  -10.20    7.90
   0  -8  21   12.30   27.60
   0   8 -21    9.80   13.10
   0  -9  21    1.70   22.60
   0  -9  21   -9.60   20.40
   0  -9  21    0.50   10.00
   0   9 -21    0.50   11.00
   0 -10  21    9.10   22.60
   0 -10  21  -16.80   19.60
   0 -10  21    4.80   10.30
   0  10 -21   -0.10   12.40
   0 -11  21   13.30   22.40
   0 -11  21  -10.50    7.20
   0 -11  21    1.20   22.10
   0  11 -21   24.40   14.50
   0 -12  21   -0.60   17.90
   0 -12  21    3.60   17.50
   0  12 -21   18.10   14.70
   0 -13  21   -2.20    7.50
   0 -13  21    8.40   10.20
   0  13 -21   -6.50   13.20
   0 -13 -22  340.67   60.19
   0  12  22   66.49   21.50
   0 -12 -22   52.69   24.50
   0  11  22   46.80   25.20
   0  11  22   69.39   22.30
   0 -11 -22   58.19   26.40
   0  10  22  131.79   34.60
   0  10  22  138.89   28.80
   0 -10 -22  173.28   38.80
   0   9  22  189.18   43.30
   0   9  22  280.87   40.40
   0  -9 -22  232.48   46.80
   0   8  22  100.09   23.80
   0   8  22  128.39   34.60
   0   7  22  363.76   47.10
   0   7  22  354.06   54.69
   0   7  22  350.76   43.80
   0   6  22  598.64   53.39
   0   6  22  544.65   61.19
   0   6  22  577.84   70.79
   0   5  22   51.89   29.00
   0   5  22   17.60   14.60
   0   5  22   50.89   23.30
   0   5  22   69.79   18.80
   0   4  22  741.63   91.79
   0   4  22  580.74   54.49
   0   4  22  641.44   58.99
   0   4  22  626.74   71.69
   0  -4 -22  669.03   55.19
   0   3  22  490.35   52.39
   0   3  22  489.35   54.79
   0   3  22  585.24   91.69
   0   3  22  475.05   60.19
   0  -3 -22  524.65   47.90
   0   2  22  245.88   33.40
   0   2  22  305.77   43.80
   0   2  22  192.38   33.70
   0  -2 -22  225.58   34.50
   0   1  22   70.09   18.30
   0   1  22   65.49   22.30
   0   1  22   74.09   21.50
   0  -1 -22   72.59   19.90
   0   0  22  398.06   48.70
   0   0  22  309.07   42.50
   0   0  22  461.85   55.89
   0   0  22  425.56   37.30
   0   0 -22  287.17   59.99
   0   0 -22  263.27   40.00
   0  -1  22   98.49   18.80
   0  -1  22   62.39   16.40
   0  -1  22   77.79   21.40
   0  -1  22   71.79   20.10
   0  -1  22   85.59   20.10
   0   1 -22   48.10   18.10
   0  -2  22  267.47   37.50
   0  -2  22  234.58   30.60
   0  -2  22  218.38   31.30
   0  -2  22  258.47   45.10
   0   2 -22  203.58   34.10
   0  -3  22  545.95   49.50
   0  -3  22  482.65   42.40
   0  -3  22  509.05   44.30
   0   3 -22  427.66   53.29
   0  -4  22  617.14   54.49
   0  -4  22  589.24   47.40
   0  -4  22  606.54   46.80
   0   4 -22  528.05   59.69
   0  -5  22   24.80    8.00
   0  -5  22   23.80    8.70
   0  -5  22   22.10   14.40
   0  -5  22   46.50   33.40
   0   5 -22   22.20   14.50
   0  -6  22  494.85   89.29
   0  -6  22  730.43  106.79
   0  -6  22  646.24   54.29
   0   6 -22  466.85   57.89
   0  -7  22  478.65   84.79
   0  -7  22  280.57   37.20
   0  -7  22  206.68   58.29
   0   7 -22  238.28   37.40
   0  -8  22  116.09   22.50
   0  -8  22  103.39   45.10
   0  -8  22   41.90   35.00
   0   8 -22   45.30   19.10
   0  -9  22  283.87   35.50
   0  -9  22  211.48   58.19
   0  -9  22  260.57   63.39
   0   9 -22  238.58   38.10
   0 -10  22   78.39   39.10
   0 -10  22  110.19   21.80
   0 -10  22  137.89   46.10
   0  10 -22  132.89   28.60
   0 -11  22   39.90   30.20
   0 -11  22   82.29   17.10
   0 -11  22   57.49   31.40
   0  11 -22   37.60   19.50
   0 -12  22    7.20   19.70
   0 -12  22   57.19   24.40
   0  12 -22   58.19   21.90
   0 -13  22  274.77   33.00
   0 -13  22  220.48   30.30
   0 -12 -23  -14.20   16.20
   0  11  23   -6.90   11.70
   0 -11 -23    2.90   19.40
   0  10  23   14.10   20.70
   0  10  23    2.00   12.70
   0 -10 -23  -16.70    8.10
   0   9  23   11.00   21.00
   0   9  23   -2.50   10.80
   0  -9 -23   21.40   20.20
   0   8  23   -1.00   12.10
   0   8  23   21.40   21.40
   0   7  23   -1.30   13.00
   0   7  23    6.00   17.90
   0   7  23    6.80   11.30
   0   6  23   -0.70   10.70
   0   6  23   -2.60   16.70
   0   6  23   -4.00   11.30
   0   5  23  -23.20    8.50
   0   5  23    3.90   10.50
   0   5  23    1.40   16.90
   0   4  23  -14.90   13.30
   0   4  23   -7.50   10.90
   0   4  23  -14.50    7.50
   0  -4 -23   -6.10    9.70
   0   3  23    1.80   10.10
   0   3  23    4.20    9.60
   0   3  23    6.80   16.80
   0  -3 -23    7.20   11.50
   0   2  23   18.00   12.70
   0   2  23    4.10   12.20
   0   2  23    2.40   15.60
   0  -2 -23   -4.30   10.80
   0   1  23    1.70   10.10
   0   1  23  -12.90    9.90
   0   1  23   13.60   15.20
   0  -1 -23   -4.50   10.00
   0   0  23  -11.70    8.20
   0   0  23    3.60    8.60
   0   0  23   10.80   14.10
   0   0 -23    4.00   12.00
   0  -1  23   10.90   13.80
   0  -1  23    3.00   10.60
   0  -1  23    6.20   11.60
   0  -1  23    7.30   13.00
   0   1 -23    6.30   12.30
   0  -2  23   -4.20    9.20
   0  -2  23   -6.70    7.70
   0  -2  23   -6.80    9.80
   0   2 -23   -0.70   12.10
   0  -3  23   -2.20    7.30
   0  -3  23    1.60    8.80
   0  -3  23   -4.00   10.80
   0   3 -23   -2.20   10.80
   0  -4  23    4.20    8.00
   0  -4  23    7.00   11.30
   0  -4  23   -0.90    6.80
   0   4 -23   29.60   16.10
   0  -5  23   -6.60   19.60
   0  -5  23    0.50   10.20
   0  -5  23   -1.80    5.50
   0  -5  23   -3.30    5.20
   0   5 -23   -9.80   10.90
   0  -6  23    2.40   11.70
   0  -6  23    2.40   30.00
   0   6 -23    2.50   12.90
   0  -7  23   17.20   33.90
   0  -7  23    6.00   12.10
   0  -7  23   -9.80   24.30
   0   7 -23   -0.70   11.70
   0  -8  23   -6.40   26.40
   0  -8  23  -15.30   24.00
   0  -8  23   -3.50   11.50
   0   8 -23    8.90   13.20
   0  -9  23   40.40   30.90
   0  -9  23  -12.20   27.50
   0  -9  23    1.60   11.50
   0   9 -23   11.90   14.30
   0 -10  23   -7.20   22.70
   0 -10  23  -10.30    9.10
   0 -10  23  -19.00   21.90
   0  10 -23    2.90   12.40
   0 -11  23  -21.10   19.40
   0 -11  23    2.30   10.30
   0 -11  23  -14.80   23.90
   0  11 -23    5.50   14.60
   0 -12  23  -29.60   16.50
   0 -13  23    3.80   14.40
   0 -13  23    5.60   14.10
   0 -11 -24  143.19   40.80
   0  10  24  360.16   50.09
   0 -10 -24  433.96   65.29
   0   9  24   85.09   34.00
   0   9  24  101.29   25.80
   0  -9 -24  153.78   39.40
   0   8  24   57.29   20.80
   0   8  24   95.79   32.50
   0   7  24  760.02   84.29
   0   7  24  833.12   69.09
   0   7  24  663.73   83.69
   0   6  24  640.84   77.39
   0   6  24  629.34   66.69
   0   6  24  630.14   68.69
   0   5  24   33.50   16.90
   0   5  24   58.49   26.90
   0   5  24   14.90   16.90
   0   4  24  256.07   43.70
   0   4  24  190.48   32.60
   0   4  24  231.28   38.40
   0   3  24  611.04   63.49
   0   3  24  481.35   63.99
   0   3  24  537.95   49.99
   0  -3 -24  447.86   52.89
   0   2  24   87.69   23.30
   0   2  24   47.90   16.80
   0   2  24   43.30   21.80
   0  -2 -24   36.60   19.00
   0   1  24  170.18   32.80
   0   1  24  203.18   35.60
   0   1  24  156.98   27.20
   0  -1 -24  189.78   32.60
   0   0  24  393.86   49.10
   0   0  24  374.16   47.80
   0   0 -24  279.87   42.80
   0  -1  24  161.28   31.00
   0   1 -24  244.88   37.20
   0  -2  24   74.39   17.70
   0  -2  24   74.59   19.40
   0  -2  24   49.90   19.00
   0   2 -24   59.89   21.70
   0  -3  24  618.14   55.29
   0  -3  24  492.85   45.40
   0  -3  24  522.15   47.30
   0   3 -24  514.55   60.09
   0  -4  24  259.97   37.50
   0  -4  24  222.58   27.90
   0  -4  24  181.78   24.50
   0   4 -24  189.88   35.50
   0  -5  24   35.90   16.80
   0  -5  24   35.20   14.70
   0   5 -24   18.40   15.40
   0  -6  24  577.34   51.29
   0  -6  24  316.07   75.59
   0   6 -24  443.26   56.89
   0  -7  24  647.84  107.09
   0  -7  24  816.62   65.39
   0   7 -24  621.44   71.99
   0  -8  24  123.89   25.60
   0  -8  24   83.89   43.00
   0  -8  24    3.30   32.40
   0   8 -24   44.50   18.90
   0  -9  24  114.39   49.00
   0  -9  24  115.79   24.40
   0  -9  24   51.89   36.90
   0   9 -24   70.29   24.50
   0 -10  24  362.46   69.09
   0 -10  24  361.16   41.70
   0 -10  24  261.57   65.39
   0  10 -24  349.57   51.09
   0 -11  24   31.40   34.00
   0 -11  24   60.99   34.60
   0  11 -24   97.49   42.80
   0 -12  24   37.10   28.40
   0 -11 -25    2.30   27.70
   0  10  25   -8.40   11.80
   0 -10 -25   10.30   19.00
   0   9  25  -30.70   17.90
   0   9  25    2.40   14.40
   0  -9 -25    0.20   20.80
   0   8  25  -10.30   12.10
   0   8  25   35.20   26.10
   0   7  25   -0.90   13.70
   0   7  25    7.90   18.10
   0   6  25    9.00   18.60
   0   6  25   -3.10   13.70
   0   6  25   -3.90   11.40
   0   5  25    0.70   12.90
   0   5  25   11.40   19.90
   0   5  25  -16.10   10.90
   0   4  25   -9.10   11.00
   0   4  25   -4.80   15.30
   0   4  25   -4.80   10.90
   0   3  25   -2.00   12.50
   0   3  25   19.20   19.20
   0   3  25   22.60   14.50
   0  -3 -25   -2.30   10.10
   0   2  25    2.10   10.00
   0   2  25   -3.40   15.50
   0   2  25   25.50   15.60
   0  -2 -25   -4.10   12.00
   0   1  25   10.60   13.30
   0   1  25    0.50    9.70
   0   1  25    8.30   15.30
   0  -1 -25    3.00   11.40
   0   0  25    4.80   16.70
   0   0  25   13.30   14.40
   0   0 -25   20.50   15.20
   0  -1  25   12.70   13.80
   0   1 -25   14.40   14.60
   0  -2  25   12.40   14.40
   0  -2  25   14.50   12.10
   0  -2  25    5.70   13.10
   0   2 -25    0.70   12.80
   0  -3  25  -12.70    8.30
   0  -3  25    2.70   13.10
   0  -3  25   -3.90    8.30
   0   3 -25   21.00   14.60
   0  -4  25   -4.60   11.50
   0  -4  25   -5.60    6.60
   0  -4  25    0.30    8.60
   0   4 -25    4.10   14.30
   0  -5  25    3.50   13.50
   0   5 -25    3.50   12.70
   0  -6  25    7.50   13.40
   0   6 -25   13.10   15.40
   0  -7  25    0.70   12.60
   0  -7  25    2.80   34.10
   0   7 -25    2.80   13.70
   0  -8  25   -1.80   12.60
   0  -8  25  -18.50   27.80
   0   8 -25   16.30   17.20
   0  -9  25   30.20   33.50
   0  -9  25  -25.10   25.20
   0   9 -25   -3.10   11.10
   0 -10  25  -13.30   24.50
   0 -10  25   36.50   34.30
   0  10 -25   13.80   25.40
   0 -11  25  -16.90   25.50
   0 -11  25   76.99   37.20
   0 -10 -26  376.56   64.39
   0   9  26   22.50   16.60
   0  -9 -26   14.20   20.90
   0   8  26  118.29   28.80
   0   8  26  102.69   37.20
   0   7  26  283.97   54.49
   0   7  26  286.07   43.60
   0   6  26  418.96   62.49
   0   6  26  310.57   46.10
   0   6  26  357.66   51.09
   0   5  26   21.60   16.60
   0   5  26   17.70   16.00
   0   5  26    4.00   21.00
   0   4  26   94.79   24.40
   0   4  26   68.49   27.90
   0   4  26   66.89   24.50
   0   3  26  636.74   72.69
   0   3  26  505.35   62.49
   0   3  26  505.65   57.69
   0   2  26   15.30   20.10
   0   2  26   23.20   18.10
   0   2  26   16.20   12.90
   0  -2 -26   12.90   16.20
   0   1  26  332.77   48.70
   0   1  26  250.47   42.50
   0  -1 -26  323.27   44.50
   0   0  26 1031.00   85.09
   0   0 -26  943.01   82.89
   0  -1  26  282.67   43.10
   0   1 -26  270.47   42.70
   0  -2  26   20.30   16.60
   0   2 -26   11.60   15.60
   0  -3  26  590.24   51.19
   0  -3  26  568.34   64.39
   0  -3  26  574.04   49.60
   0   3 -26  479.45   62.59
   0  -4  26   65.79   23.40
   0   4 -26   82.49   25.70
   0  -5  26    1.50   14.00
   0   5 -26   -9.10   11.60
   0  -6  26  447.16   52.29
   0   6 -26  246.28   43.80
   0   7 -26  207.88   38.20
   0  -8  26   63.49   43.20
   0   8 -26   75.79   25.40
   0  -9  26  -11.50   28.90
   0 -10  26  257.37   65.09
   0 -10  26  288.87   66.49
   0 -11  26   61.59   41.20
   0 -11  26   42.00   35.70
   0  -9 -27   19.90   25.70
   0   8  27    6.30   14.40
   0   7  27    6.90   15.80
   0   7  27   -2.70   23.10
   0   6  27   -9.70   15.30
   0   6  27   23.20   23.60
   0   6  27   13.40   16.20
   0   5  27    5.60   13.60
   0   5  27   -8.00   15.10
   0   5  27    0.80   22.00
   0   4  27    2.30   19.00
   0   4  27    1.10   12.60
   0   4  27   10.00   16.90
   0   3  27   -2.70   11.70
   0   3  27   -9.90   13.50
   0   3  27   -7.20   20.90
   0   2  27   22.30   19.50
   0   2  27   15.20   17.60
   0  -2 -27   19.10   15.50
   0   1  27  -16.30   12.50
   0  -1 -27    7.10   14.90
   0   0  27    6.60   14.70
   0   0 -27   20.20   16.70
   0  -1  27   13.30   14.60
   0   1 -27    3.90   16.20
   0  -2  27   -5.40   12.30
   0   2 -27    1.40   14.60
   0  -3  27    4.00   13.30
   0   3 -27    7.90   15.30
   0  -4  27   11.50   17.70
   0   4 -27    0.00   15.90
   0   5 -27   -5.70   14.50
   0   6 -27   15.30   15.90
   0   7 -27    1.00   15.60
   0  -9  27   19.70   36.10
   0 -10  27   -0.20   34.10
   0 -10  27    6.70   33.20
   0   7  28  152.38   32.80
   0   6  28  184.88   46.70
   0   6  28  187.28   37.20
   0   5  28   35.00   27.00
   0   5  28    8.90   19.00
   0   5  28   15.90   15.40
   0   4  28  388.36   55.69
   0   4  28  361.36   49.60
   0   4  28  399.36   61.39
   0   3  28   80.49   27.40
   0   3  28   94.99   31.00
   0   2  28   13.40   16.70
   0   1  28  274.17   44.50
   0  -1 -28  197.48   39.00
   0   0  28  390.26   54.89
   0   0 -28  439.76   57.19
   0  -1  28  269.87   51.29
   0   1 -28  289.97   45.90
   0   2 -28   -8.00   14.40
   0   3 -28   86.39   28.10
   0   4 -28  341.17   51.59
   0   5 -28   14.00   17.00
   0   6 -28  128.19   31.50
   0   6  29   -3.00   16.20
   0   5  29   -0.30   14.40
   0   5  29   47.10   28.20
   0   4  29   -1.90   22.70
   0  -1 -29    0.30   16.30
   0   0 -29   12.90   19.30
   0   1 -29   15.10   18.20
   0   2 -29   -3.10   16.40
   0   3 -29  -22.60   14.20
   0   4 -29    3.50   16.50
   0   0 -30  384.36   55.79
   0   1 -30   69.49   28.70
   0   2 -30   80.09   28.70
   0   3 -30  124.29   35.20
   0   1 -31   -5.50   21.60
   1   1 -31  186.18   41.20
   1   3 -30   21.60   21.60
   1   2 -30   49.90   25.50
   1   1 -30   -6.30   18.50
   1   0 -30   23.40   20.90
   1   5 -29  227.48   62.19
   1   4 -29   58.29   24.60
   1   3 -29   -2.00   16.20
   1   2 -29  179.48   39.60
   1   1 -29  133.49   33.10
   1   0 -29    5.90   17.50
   1  -1 -29  115.29   36.00
  -1   4  29   99.69   33.50
  -1   5  29  264.87   44.50
  -1   5  29  318.77   57.49
  -1   6  29  114.29   29.90
   1   6 -28   14.70   18.60
   1   5 -28   45.60   23.30
   1   4 -28  -12.80   13.70
   1   3 -28   41.30   21.10
   1   2 -28   42.10   22.70
   1   1 -28   24.40   20.20
  -1  -1  28   14.80   18.40
   1   0 -28   21.40   18.00
  -1   0  28   14.30   17.50
   1  -1 -28   27.10   20.50
  -1   1  28   40.60   21.90
  -1   2  28   37.80   20.80
  -1   3  28   27.10   22.50
  -1   3  28   15.30   18.60
  -1   4  28   37.60   26.40
  -1   4  28   26.20   18.50
  -1   4  28    4.50   15.50
  -1   5  28  100.29   33.30
  -1   5  28   53.69   22.20
  -1   5  28  112.09   31.30
  -1   6  28   -1.20   14.60
  -1   6  28    9.50   21.90
  -1   7  28    8.40   15.40
  -1 -10  27    6.70   37.80
  -1 -10  27   14.30   48.10
  -1  -9  27  143.99   56.89
   1   7 -27  106.79   31.00
   1   6 -27  118.09   30.90
   1   5 -27  306.77   48.90
   1   4 -27  105.99   30.70
  -1  -4  27  152.58   36.60
   1   3 -27   22.90   19.10
  -1  -3  27   32.30   18.90
   1   2 -27  264.77   43.70
  -1  -2  27  262.67   43.10
   1   1 -27  263.87   43.70
  -1  -1  27  298.87   45.30
   1   0 -27    9.70   16.10
  -1   0  27    1.50   14.50
   1  -1 -27  307.77   44.80
  -1   1  27  331.57   48.80
   1  -2 -27  284.17   43.70
  -1   2  27  304.17   49.99
  -1   2  27  321.17   47.60
  -1   3  27   55.69   20.30
  -1   3  27   50.79   21.90
  -1   3  27   29.20   24.80
  -1   4  27  108.79   26.40
  -1   4  27  118.09   32.90
  -1   4  27   45.30   23.00
  -1   5  27  449.26   65.89
  -1   5  27  378.36   55.29
  -1   5  27  405.46   52.69
  -1   6  27  105.69   34.60
  -1   6  27   83.59   28.70
  -1   6  27  150.88   31.90
  -1   7  27  107.49   26.90
  -1   7  27  112.89   39.80
  -1   8  27  248.88   42.60
   1  -9 -27  223.28   52.49
  -1 -11  26   18.50   37.40
  -1 -11  26    4.30   29.90
  -1 -10  26   29.20   35.50
  -1 -10  26   10.70   33.90
  -1  -9  26   12.90   38.40
   1   8 -26   24.70   17.40
  -1  -8  26   37.40   34.20
   1   7 -26  -13.90   13.50
   1   6 -26   -3.90   10.10
  -1  -6  26   32.30   18.30
   1   5 -26   26.50   18.60
  -1  -5  26   80.59   23.40
   1   4 -26   44.10   21.20
  -1  -4  26   24.20   17.50
   1   3 -26    4.40   14.90
  -1  -3  26    1.60    9.70
  -1  -3  26    4.40   10.40
  -1  -3  26    7.50   14.60
   1   2 -26   23.70   16.10
  -1  -2  26   52.49   21.40
   1   1 -26   23.40   16.40
  -1  -1  26   61.99   21.90
   1   0 -26   -7.60   13.20
  -1   0  26   -3.20   13.00
   1  -1 -26   26.90   17.20
  -1   1  26   12.10   15.60
  -1   1  26   21.50   18.00
   1  -2 -26   35.20   18.80
  -1   2  26   37.10   19.70
  -1   2  26   38.70   16.40
  -1   2  26   54.69   24.40
  -1   3  26    9.70   19.40
  -1   3  26   -1.10   12.10
  -1   3  26  -12.00   12.70
  -1   4  26   20.10   18.70
  -1   4  26   37.10   18.60
  -1   4  26   23.90   23.10
  -1   5  26   37.10   17.10
  -1   5  26   14.70   18.30
  -1   5  26   55.49   25.90
  -1   6  26   55.09   28.30
  -1   6  26   14.80   15.30
  -1   6  26    5.20   15.90
  -1   7  26   27.40   26.20
  -1   7  26    7.80   14.70
  -1   8  26   15.70   16.40
  -1   8  26   38.60   28.60
   1  -9 -26    0.30   14.30
  -1   9  26    3.20   16.10
   1 -10 -26   27.30   26.10
  -1 -11  25  128.99   48.50
  -1 -11  25  153.78   49.30
   1  10 -25   10.30   24.80
  -1 -10  25    9.30   31.00
  -1 -10  25   15.30   30.80
   1   9 -25  139.89   32.20
  -1  -9  25  169.58   60.69
  -1  -9  25  218.28   63.89
   1   8 -25  194.98   38.50
  -1  -8  25  167.88   54.79
  -1  -8  25  314.77   41.90
   1   7 -25   35.30   18.30
  -1  -7  25   55.19   20.00
  -1  -7  25   72.39   54.19
   1   6 -25  132.59   31.90
  -1  -6  25  221.68   35.10
   1   5 -25  365.66   48.50
  -1  -5  25  253.57   40.50
   1   4 -25  105.69   27.40
  -1  -4  25  130.59   28.20
  -1  -4  25  101.29   19.20
  -1  -4  25  102.59   18.50
   1   3 -25   85.79   24.40
  -1  -3  25   65.79   18.40
  -1  -3  25   71.79   22.10
  -1  -3  25   75.59   17.90
   1   2 -25  566.24   64.19
  -1  -2  25  544.25   62.59
  -1  -2  25  589.24   54.29
   1   1 -25  360.76   51.09
  -1  -1  25  527.75   57.89
   1   0 -25   10.10   14.50
  -1   0  25   -7.20   13.50
  -1   0  25   -1.00   13.60
   1  -1 -25  421.46   52.19
  -1   1  25  466.45   56.49
  -1   1  25  429.86   54.99
  -1   1  25  477.25   51.09
   1  -2 -25  530.15   60.69
  -1   2  25  580.84   53.79
  -1   2  25  541.05   63.29
  -1   2  25  643.34   71.99
   1  -3 -25   69.39   20.80
  -1   3  25   87.99   22.50
  -1   3  25  119.89   28.50
  -1   3  25   80.89   28.20
  -1   4  25  113.29   32.90
  -1   4  25   84.59   23.50
  -1   4  25  127.49   30.50
  -1   5  25  269.97   48.10
  -1   5  25  199.88   34.60
  -1   5  25  231.88   39.40
  -1   6  25  174.98   35.70
  -1   6  25  188.18   33.90
  -1   6  25  187.78   41.80
  -1   7  25   66.29   21.10
  -1   7  25  114.69   36.30
  -1   8  25  180.08   45.00
  -1   8  25  304.17   42.80
   1  -9 -25  155.48   40.30
  -1   9  25  117.49   28.60
   1 -10 -25   19.40   20.90
  -1  10  25    2.80   12.40
   1 -11 -25  252.57   61.99
  -1 -12  24   -4.10   21.50
  -1 -12  24  -12.40   20.50
  -1 -11  24   14.50   28.00
  -1 -11  24    5.20   31.50
   1  10 -24   13.40   17.10
  -1 -10  24  -20.20   29.00
  -1 -10  24   -0.40   28.30
  -1 -10  24   12.60   14.70
   1   9 -24    8.50   15.20
  -1  -9  24   23.40   37.00
  -1  -9  24   37.90   16.50
  -1  -9  24   40.60   36.80
   1   8 -24   98.79   25.40
  -1  -8  24   84.99   45.50
  -1  -8  24   68.39   20.30
  -1  -8  24   65.29   41.10
   1   7 -24   15.70   15.00
  -1  -7  24   11.70   33.10
  -1  -7  24   21.90   14.90
   1   6 -24    8.40   14.30
  -1  -6  24   -2.80   24.10
  -1  -6  24    2.50   13.50
   1   5 -24   26.80   17.60
  -1  -5  24   33.80   12.70
  -1  -5  24   39.00   18.10
  -1  -5  24   28.10   10.20
   1   4 -24   19.50   15.80
  -1  -4  24    6.40    8.90
  -1  -4  24   10.50    9.90
  -1  -4  24   24.90   16.30
   1   3 -24   64.89   21.80
  -1  -3  24   66.39   21.70
  -1  -3  24   46.20   15.30
  -1  -3  24   57.59   16.40
   1   2 -24  106.99   25.90
  -1  -2  24  110.09   23.70
  -1  -2  24   71.49   18.60
  -1  -2  24  102.99   24.90
   1   1 -24   16.90   14.20
  -1  -1  24  109.39   25.70
   1   0 -24  -11.40   12.20
  -1   0  24    5.40   14.00
  -1   0  24    1.20   12.20
  -1   0  24    5.40    8.10
   1  -1 -24   45.70   18.40
  -1   1  24   67.79   19.10
  -1   1  24   61.39   22.20
  -1   1  24   46.30   19.40
   1  -2 -24   87.69   21.80
  -1   2  24   57.69   24.90
  -1   2  24  103.89   25.20
  -1   2  24   64.49   19.20
   1  -3 -24   35.10   17.00
  -1   3  24   36.10   22.00
  -1   3  24   34.00   15.50
  -1   3  24   58.09   21.00
  -1   4  24    5.20   12.40
  -1   4  24   18.50   14.30
  -1   4  24  -12.20   14.70
  -1   5  24   29.00   17.80
  -1   5  24   33.40   22.20
  -1   5  24   36.60   15.80
  -1   6  24    5.50   18.40
  -1   6  24   27.70   17.10
  -1   6  24   26.50   14.40
  -1   7  24   30.90   18.10
  -1   7  24   30.90   22.00
  -1   8  24   80.19   31.60
  -1   8  24   51.69   19.80
   1  -9 -24   69.99   29.70
  -1   9  24   62.69   21.00
  -1   9  24   61.39   27.00
   1 -10 -24   -7.90   13.50
  -1  10  24    2.60   12.10
   1 -11 -24   23.30   21.90
  -1 -13  23  -15.80   16.90
  -1 -13  23   16.40   16.50
  -1 -12  23  193.68   43.60
  -1 -12  23  103.49   32.90
   1  11 -23  153.48   33.10
  -1 -11  23  138.69   44.20
  -1 -11  23  222.98   29.50
   1  10 -23   21.20   15.00
  -1 -10  23   38.70   16.10
  -1 -10  23   46.80   33.50
  -1 -10  23    9.80   30.30
   1   9 -23  225.08   38.40
  -1  -9  23  226.88   58.99
  -1  -9  23  171.78   51.39
  -1  -9  23  258.77   34.10
   1   8 -23  307.67   45.80
  -1  -8  23  351.96   77.79
  -1  -8  23  244.68   64.79
  -1  -8  23  428.56   45.90
   1   7 -23   29.30   15.50
  -1  -7  23   -2.80   29.60
  -1  -7  23   -4.50   27.80
  -1  -7  23    6.60   12.10
   1   6 -23   82.59   22.80
  -1  -6  23  147.29   52.69
  -1  -6  23   59.39   20.00
   1   5 -23  415.86   55.69
  -1  -5  23  463.25   54.49
  -1  -5  23  572.04   40.70
  -1  -5  23  534.05   40.60
   1   4 -23  245.68   37.50
  -1  -4  23  149.09   22.50
  -1  -4  23  157.78   28.90
  -1  -4  23  136.89   21.00
   1   3 -23  137.89   28.40
  -1  -3  23  139.09   27.70
  -1  -3  23  126.09   22.90
  -1  -3  23  131.09   21.60
   1   2 -23  647.44   57.99
  -1  -2  23  542.25   59.79
  -1  -2  23  558.14   49.30
  -1  -2  23  545.75   51.59
   1   1 -23  541.35   60.49
  -1  -1  23  512.55   57.99
  -1  -1  23  608.14   56.09
  -1  -1  23  654.43   55.79
   1   0 -23    2.30   10.70
  -1   0  23   18.60   15.10
  -1   0  23   -0.80    8.60
  -1   0  23   -8.70   10.90
   1  -1 -23  592.14   55.19
  -1   1  23  536.95   60.59
  -1   1  23  627.94   67.29
  -1   1  23  567.44   51.09
   1  -2 -23  581.54   54.69
  -1   2  23  670.53   70.69
  -1   2  23  589.64   53.29
  -1   2  23  600.24   56.69
   1  -3 -23  100.49   23.40
  -1   3  23  174.88   32.10
  -1   3  23  127.09   31.00
  -1   3  23  115.29   24.10
   1  -4 -23  122.49   23.90
  -1   4  23  172.78   36.10
  -1   4  23  167.88   31.30
  -1   4  23  128.39   26.10
  -1   5  23  429.56   52.29
  -1   5  23  429.36   49.20
  -1   5  23  410.86   58.19
  -1   6  23  149.39   34.60
  -1   6  23  114.39   26.80
  -1   6  23  117.59   25.10
  -1   7  23    6.20   15.00
  -1   7  23   40.90   24.40
  -1   7  23   27.70   15.40
  -1   8  23  303.97   54.79
  -1   8  23  386.06   46.90
   1  -9 -23  217.08   45.80
  -1   9  23  172.58   32.30
  -1   9  23  266.97   50.99
   1 -10 -23   35.40   20.10
  -1  10  23   41.60   18.20
  -1  10  23   49.40   26.20
   1 -11 -23  199.08   45.90
  -1  11  23  141.99   30.20
   1 -12 -23  168.78   41.60
  -1 -13  22   -4.20   15.00
  -1 -13  22   -3.20   13.20
   1  12 -22   40.20   18.40
  -1 -12  22   42.30   24.60
  -1 -12  22   13.70   22.70
   1  11 -22   88.49   25.50
  -1 -11  22  105.39   19.50
  -1 -11  22   72.19   31.60
   1  10 -22    9.30   14.30
  -1 -10  22    9.90   12.20
  -1 -10  22  -16.00   22.70
  -1 -10  22   56.29   33.60
   1   9 -22   16.00   14.90
  -1  -9  22   68.79   18.30
  -1  -9  22   -9.40   28.30
  -1  -9  22   39.80   35.00
   1   8 -22   33.30   17.60
  -1  -8  22  -25.80   21.90
  -1  -8  22    4.70   29.30
  -1  -8  22   19.20   13.50
   1   7 -22   26.40   15.40
  -1  -7  22   52.79   37.20
  -1  -7  22   17.90   30.40
  -1  -7  22   21.30   13.80
   1   6 -22   14.60   13.20
  -1  -6  22   -0.60   30.20
  -1  -6  22   19.10   30.80
  -1  -6  22    4.70   12.10
   1   5 -22    4.30   12.20
  -1  -5  22    5.30    6.30
  -1  -5  22    1.80    5.80
  -1  -5  22    7.10   11.60
  -1  -5  22  -29.50   20.90
   1   4 -22   24.70   14.50
  -1  -4  22    9.30   11.80
  -1  -4  22   18.80    9.20
  -1  -4  22   13.90   21.40
  -1  -4  22    8.30    8.40
   1   3 -22   15.70   12.90
  -1  -3  22   22.80   11.30
  -1  -3  22   31.20   15.20
  -1  -3  22   25.40   10.70
   1   2 -22  103.39   24.10
  -1  -2  22   94.99   22.10
  -1  -2  22  114.09   24.70
  -1  -2  22  123.59   22.00
  -1  -2  22  135.49   24.40
   1   1 -22  159.48   29.70
  -1  -1  22  234.98   34.30
  -1  -1  22  197.98   30.60
  -1  -1  22  179.88   30.50
  -1  -1  22  202.28   27.10
  -1  -1  22  129.29   24.00
   1   0 -22    1.70   21.40
   1   0 -22    5.60   12.20
  -1   0  22    6.10    9.50
  -1   0  22   -6.50    9.30
  -1   0  22    3.60   11.80
   1  -1 -22  219.68   32.90
  -1   1  22  169.18   33.40
  -1   1  22  218.48   30.80
  -1   1  22  150.18   29.50
   1  -2 -22   83.59   20.60
  -1   2  22  115.19   28.70
  -1   2  22  110.99   25.40
  -1   2  22   70.09   18.20
   1  -3 -22   27.80   13.70
  -1   3  22   31.20   15.50
  -1   3  22   15.30   17.00
  -1   3  22   47.50   28.50
  -1   3  22   22.00   12.60
   1  -4 -22   36.70   14.30
  -1   4  22   25.30   25.50
  -1   4  22   33.20   19.50
  -1   4  22   21.80   12.90
  -1   4  22    0.80   11.90
  -1   5  22   -2.80   11.70
  -1   5  22    7.90   16.10
  -1   5  22  -18.80   17.50
  -1   5  22   -2.20    9.10
  -1   6  22   20.80   11.70
  -1   6  22   -5.60   14.90
  -1   6  22    4.30   12.00
  -1   7  22   20.20   20.50
  -1   7  22   25.10   15.40
  -1   7  22   10.40   12.40
  -1   8  22   28.70   20.60
  -1   8  22  -11.10    9.20
   1  -9 -22   60.09   26.60
  -1   9  22   69.09   28.30
  -1   9  22   45.20   18.30
   1 -10 -22   -2.90   14.30
  -1  10  22   22.90   22.40
  -1  10  22    6.10   12.40
   1 -11 -22   90.29   32.40
  -1  11  22  113.79   26.40
  -1  11  22   87.09   30.20
   1 -12 -22   71.09   28.90
  -1  12  22   45.80   18.10
   1 -13 -22    0.30   19.70
   1 -13 -22   22.00   44.50
   1  13 -21    5.10   14.70
  -1 -13  21   15.70   13.70
  -1 -13  21    3.50   11.80
   1  12 -21  240.18   39.10
  -1 -12  21  196.98   40.60
  -1 -12  21  206.58   41.10
   1  11 -21   56.49   20.50
  -1 -11  21   85.09   17.60
  -1 -11  21   80.19   33.00
   1  10 -21    0.00   11.10
  -1 -10  21    0.70    8.90
  -1 -10  21   16.60   26.90
  -1 -10  21   19.10   25.20
   1   9 -21  261.77   41.00
  -1  -9  21  366.96   69.39
  -1  -9  21  278.67   60.19
  -1  -9  21  341.77   38.50
   1   8 -21  228.28   37.40
  -1  -8  21  268.97   35.00
  -1  -8  21  371.66   70.19
  -1  -8  21  325.67   70.59
   1   7 -21   67.69   21.40
  -1  -7  21  155.98   50.29
  -1  -7  21   87.49   41.60
  -1  -7  21  133.79   24.60
   1   6 -21   99.59   24.40
  -1  -6  21  206.58   56.39
  -1  -6  21  166.48   27.40
  -1  -6  21   88.89   39.20
   1   5 -21  150.18   28.10
  -1  -5  21  170.58   19.80
  -1  -5  21  184.48   29.20
  -1  -5  21  216.58   58.29
  -1  -5  21  237.78   59.99
  -1  -5  21  151.88   18.50
   1   4 -21   28.50   15.30
  -1  -4  21  144.49   49.50
  -1  -4  21   66.39   14.50
  -1  -4  21   58.69   13.10
  -1  -4  21   95.49   21.10
   1   3 -21   40.40   16.00
  -1  -3  21   40.50   15.90
  -1  -3  21   54.29   14.80
  -1  -3  21   72.99   15.50
  -1  -3  21   26.80   28.60
   1   2 -21  598.74   56.39
  -1  -2  21  681.33   56.99
  -1  -2  21  640.04   53.69
  -1  -2  21  607.44   53.59
  -1  -2  21  653.83   52.49
   1   1 -21  667.43   87.09
   1   1 -21  548.15   52.99
  -1  -1  21  601.54   50.69
  -1  -1  21  662.03   54.89
  -1  -1  21  586.74   48.30
  -1  -1  21  568.94   53.29
  -1  -1  21  571.34   52.89
   1   0 -21   -5.50    9.70
   1   0 -21    9.10   18.50
  -1   0  21    3.20    8.40
  -1   0  21   -1.10    7.30
  -1   0  21   -4.00   11.20
  -1   0  21   -2.50    9.40
  -1   0  21    2.90    9.50
   1  -1 -21  536.55   51.19
   1  -1 -21  505.45   75.59
  -1   1  21  586.64   53.09
  -1   1  21  515.55   72.19
  -1   1  21  604.04   49.40
  -1   1  21  607.14   63.39
   1  -2 -21  605.04   53.19
  -1   2  21  687.43   68.69
  -1   2  21  611.84   54.79
  -1   2  21  517.95   49.00
  -1   2  21  683.93   83.69
   1  -3 -21   61.69   17.50
  -1   3  21   36.80   13.80
  -1   3  21   40.30   16.70
  -1   3  21   35.30   24.90
  -1   3  21   23.00   17.40
   1  -4 -21   80.79   20.10
   1  -4 -21   59.59   16.90
  -1   4  21   75.89   19.30
  -1   4  21   80.89   21.50
  -1   4  21   71.29   29.90
  -1   4  21   92.39   25.70
   1  -5 -21  116.49   23.50
  -1   5  21  214.08   33.40
  -1   5  21  180.88   28.40
  -1   5  21  205.88   38.10
  -1   5  21  195.18   44.50
  -1   6  21  131.69   27.30
  -1   6  21  133.29   40.60
  -1   6  21  162.38   27.10
  -1   6  21   99.39   30.50
  -1   7  21   97.49   29.30
  -1   7  21   96.19   23.30
  -1   7  21  141.79   27.80
  -1   8  21  206.28   32.60
  -1   8  21  233.68   44.70
   1  -9 -21  248.88   47.50
  -1   9  21  327.47   41.50
  -1   9  21  320.47   51.19
   1 -10 -21   17.20   20.50
  -1  10  21   -4.80    9.80
  -1  10  21  -14.90   14.40
   1 -11 -21  127.29   34.70
  -1  11  21  111.29   33.60
  -1  11  21   55.79   20.10
   1 -12 -21  296.57   52.69
   1 -12 -21  290.37   74.99
  -1  12  21  263.47   51.89
  -1  12  21  243.88   37.80
   1 -13 -21   55.09   45.00
   1 -13 -21   18.80   25.30
   1 -14 -21   38.30   39.90
   1 -14 -21   17.50   37.30
   1  14 -20  -11.00   12.10
   1  13 -20    4.10   13.60
  -1 -13  20   12.80   11.60
  -1 -13  20    6.30    9.50
   1  12 -20   89.29   24.10
  -1 -12  20   74.19   26.30
  -1 -12  20   43.70   21.70
   1  11 -20  101.19   24.60
  -1 -11  20  138.19   20.50
  -1 -11  20   74.59   30.20
   1  10 -20   40.60   17.40
  -1 -10  20   39.30   28.90
  -1 -10  20   -5.70   23.10
  -1 -10  20   25.70   12.10
   1   9 -20    0.80   11.70
  -1  -9  20   -9.30   20.40
  -1  -9  20   -9.10   20.90
  -1  -9  20    2.00    8.70
   1   8 -20   60.49   18.80
  -1  -8  20  132.29   44.30
  -1  -8  20   80.79   18.90
  -1  -8  20   40.20   31.40
   1   7 -20    9.90   11.80
  -1  -7  20   24.50   27.90
  -1  -7  20   42.60   31.70
  -1  -7  20   55.19   16.30
   1   6 -20   11.40   12.00
  -1  -6  20   18.80   27.10
  -1  -6  20   -1.50   20.70
  -1  -6  20   15.00   10.60
   1   5 -20  102.99   23.60
  -1  -5  20  123.59   15.50
  -1  -5  20  131.09   43.00
  -1  -5  20  103.39   14.90
  -1  -5  20  124.69   23.50
  -1  -5  20   96.29   41.40
   1   4 -20   -1.10   10.50
  -1  -4  20   14.10    8.50
  -1  -4  20    2.90    5.80
  -1  -4  20   14.60   28.80
  -1  -4  20   33.80   29.60
  -1  -4  20   -6.40    7.00
   1   3 -20  101.09   22.50
  -1  -3  20  123.99   20.30
  -1  -3  20  126.39   47.80
  -1  -3  20  105.89   22.00
  -1  -3  20  118.59   20.40
  -1  -3  20  123.89   47.30
  -1  -3  20  121.79   19.80
   1   2 -20  141.59   39.00
   1   2 -20   96.09   22.50
  -1  -2  20  204.28   56.69
  -1  -2  20  102.29   18.00
  -1  -2  20   99.99   21.50
  -1  -2  20  129.49   22.10
  -1  -2  20  108.09   19.90
  -1  -2  20  113.89   21.20
   1   1 -20   72.49   30.80
   1   1 -20   94.59   21.20
  -1  -1  20   88.89   18.60
  -1  -1  20   72.69   19.10
  -1  -1  20   88.39   27.30
  -1  -1  20   85.19   16.60
  -1  -1  20   99.19   20.30
  -1  -1  20   78.69   20.20
   1   0 -20   -6.30   15.40
   1   0 -20   -4.00    8.70
  -1   0  20   -9.20    7.30
  -1   0  20    5.50    8.30
  -1   0  20   -1.10   11.20
  -1   0  20   -0.20    8.60
  -1   0  20    2.10    7.60
  -1   0  20   11.10   15.90
   1  -1 -20   66.59   29.90
   1  -1 -20   88.09   19.90
  -1   1  20   82.39   20.20
  -1   1  20   95.69   23.40
  -1   1  20  111.99   32.10
  -1   1  20   63.89   16.60
  -1   1  20   88.59   21.10
  -1   1  20   85.99   17.60
   1  -2 -20   61.29   27.60
   1  -2 -20   21.60   10.90
   1  -2 -20   99.79   21.00
  -1   2  20   75.69   19.50
  -1   2  20  121.59   34.30
  -1   2  20   86.59   17.80
  -1   2  20  131.79   28.10
   1  -3 -20   92.59   21.30
   1  -3 -20  108.49   21.10
  -1   3  20   84.39   25.20
  -1   3  20  133.89   22.50
  -1   3  20  104.59   23.20
  -1   3  20  132.59   36.10
   1  -4 -20    1.90    8.80
   1  -4 -20   14.60   11.00
  -1   4  20   19.90   16.80
  -1   4  20   14.50   19.40
  -1   4  20    6.60   11.80
  -1   4  20   10.40    9.70
   1  -5 -20   89.49   18.60
   1  -5 -20   77.49   19.00
  -1   5  20  100.69   23.30
  -1   5  20  157.08   33.00
  -1   5  20  171.08   42.20
  -1   5  20  115.49   22.20
  -1   6  20   14.90   13.20
  -1   6  20   31.20   23.70
  -1   6  20   16.30   11.00
  -1   6  20    4.20   15.30
  -1   7  20   30.20   15.90
  -1   7  20   22.70   13.90
  -1   7  20   53.89   22.50
  -1   8  20   95.49   28.00
  -1   8  20   65.09   18.40
  -1   8  20   64.69   23.00
   1  -9 -20    4.10   10.20
   1  -9 -20    2.40   23.20
  -1   9  20    6.90   11.20
  -1   9  20   34.40   20.50
   1 -10 -20   53.69   24.60
   1 -10 -20   14.90   32.90
  -1  10  20   24.10   14.10
  -1  10  20   27.30   21.00
   1 -11 -20   91.09   53.19
   1 -11 -20   78.09   29.90
  -1  11  20  120.29   25.70
  -1  11  20  171.98   38.20
   1 -12 -20   63.19   26.40
   1 -12 -20  108.29   53.29
  -1  12  20  128.69   33.50
  -1  12  20  110.19   25.00
   1 -13 -20   45.20   43.30
   1 -13 -20   23.80   23.00
   1 -13 -20   29.20   36.60
  -1  13  20   19.20   14.60
   1 -14 -20    1.50   31.50
   1 -14 -20   -7.70   18.90
   1 -14 -20  -31.30   28.70
   1 -15 -20   45.10   37.40
   1 -15 -20   15.70   38.90
   1  14 -19   97.29   24.20
   1  13 -19   39.50   17.90
   1  12 -19  312.07   41.10
  -1 -12  19  252.87   42.10
  -1 -12  19  288.47   44.50
   1  11 -19  138.59   27.40
  -1 -11  19  252.67   47.60
  -1 -11  19  204.78   25.20
   1  10 -19    5.20   11.00
  -1 -10  19   13.40    9.70
  -1 -10  19    8.60   21.30
  -1 -10  19   -9.70   18.50
   1   9 -19  305.67   39.50
  -1  -9  19  283.27   59.19
  -1  -9  19  240.58   54.79
  -1  -9  19  306.57   34.50
   1   8 -19  400.46   46.70
  -1  -8  19  415.96   38.70
  -1  -8  19  484.75   76.19
  -1  -8  19  333.07   65.69
   1   7 -19   52.29   17.80
  -1  -7  19   40.00   13.80
  -1  -7  19   60.39   34.90
  -1  -7  19   14.60   24.90
   1   6 -19  315.27   40.50
  -1  -6  19  369.46   68.69
  -1  -6  19  370.06   39.60
  -1  -6  19  269.17   58.29
   1   5 -19  348.77   45.50
  -1  -5  19  461.85   34.80
  -1  -5  19  547.05   84.99
  -1  -5  19  489.05   35.50
  -1  -5  19  467.05   42.70
  -1  -5  19  468.75   78.39
   1   4 -19  462.65   50.49
  -1  -4  19  494.95   83.09
  -1  -4  19  503.85   82.99
  -1  -4  19  533.35   45.70
  -1  -4  19  465.85   38.30
  -1  -4  19  473.45   39.30
   1   3 -19  259.77   49.10
   1   3 -19  247.98   35.10
  -1  -3  19  250.87   61.39
  -1  -3  19  298.57   32.90
  -1  -3  19  221.88   28.70
  -1  -3  19  300.87   27.80
  -1  -3  19  269.97   60.99
  -1  -3  19  264.97   34.00
  -1  -3  19  244.18   26.60
   1   2 -19  897.51   89.19
   1   2 -19  840.92   70.19
  -1  -2  19  898.31   70.09
  -1  -2  19  888.31   67.99
  -1  -2  19  936.61  121.39
  -1  -2  19  901.21   64.39
  -1  -2  19 1114.19  127.09
  -1  -2  19  887.91   81.29
  -1  -2  19  941.21   66.99
  -1  -2  19  893.71   68.59
   1   1 -19  785.62   70.49
   1   1 -19  794.32   81.29
   1   1 -19 1079.39   95.59
  -1  -1  19  979.80   69.89
  -1  -1  19 1099.89  127.39
  -1  -1  19  861.81   71.09
  -1  -1  19 1005.50   73.29
  -1  -1  19 1071.69   87.69
  -1  -1  19  962.40   72.39
  -1  -1  19  944.71   67.69
   1   0 -19    2.40    9.20
   1   0 -19   -8.30   15.80
   1   0 -19    3.20    6.60
  -1   0  19   -2.00    6.30
  -1   0  19   -6.70    9.80
  -1   0  19   -3.30   28.50
  -1   0  19   -8.80   11.20
  -1   0  19   -1.30    7.50
  -1   0  19   -0.60    7.80
  -1   0  19   -1.50    8.90
   1  -1 -19  918.71   72.09
   1  -1 -19  975.60   72.89
   1  -1 -19 1054.89   94.69
  -1   1  19 1005.40   74.29
  -1   1  19  891.41   70.49
  -1   1  19  992.20   88.89
  -1   1  19  898.81   75.39
  -1   1  19  912.81   68.99
   1  -2 -19  800.82   66.79
   1  -2 -19  896.11   87.89
   1  -2 -19  856.51   68.09
  -1   2  19  832.12   68.89
  -1   2  19  957.00   69.89
  -1   2  19  892.61   84.89
  -1   2  19  919.11   66.49
  -1   2  19  897.31   73.49
   1  -3 -19  243.88   32.50
   1  -3 -19  272.87   51.29
   1  -3 -19  283.77   35.60
  -1   3  19  310.67   35.20
  -1   3  19  260.07   48.70
  -1   3  19  230.08   39.10
  -1   3  19  285.27   36.70
   1  -4 -19  473.65   41.20
   1  -4 -19  498.35   43.90
  -1   4  19  416.36   48.20
  -1   4  19  440.36   54.09
  -1   4  19  393.16   44.90
  -1   4  19  585.44   72.79
   1  -5 -19  452.25   40.20
   1  -5 -19  457.85   42.90
  -1   5  19  476.25   69.29
  -1   5  19  497.15   43.50
  -1   5  19  468.85   50.99
  -1   5  19  473.15   57.59
  -1   6  19  479.65   68.59
  -1   6  19  372.26   44.50
  -1   6  19  395.76   52.79
  -1   6  19  354.66   41.40
   1  -7 -19   13.70   24.30
  -1   7  19   31.00   14.90
  -1   7  19   91.69   36.90
  -1   7  19   33.10   14.00
  -1   7  19   23.90   18.40
   1  -8 -19  409.26   86.99
  -1   8  19  424.56   46.50
  -1   8  19  346.37   52.59
  -1   8  19  486.35   50.89
   1  -9 -19  227.78   65.39
   1  -9 -19  249.58   44.40
  -1   9  19  311.77   39.20
  -1   9  19  344.27   50.39
   1 -10 -19   32.40   39.10
   1 -10 -19   -4.10   34.30
   1 -10 -19    2.40   11.90
  -1  10  19   -1.40   14.90
  -1  10  19   14.50   11.90
   1 -11 -19  161.08   60.19
   1 -11 -19  275.67   69.49
   1 -11 -19  186.98   39.40
  -1  11  19  167.48   39.70
  -1  11  19  196.68   31.40
   1 -12 -19  350.76   55.69
   1 -12 -19  362.16   77.69
   1 -12 -19  409.46   82.29
  -1  12  19  321.27   43.40
  -1  12  19  348.37   53.39
   1 -13 -19   98.79   45.00
   1 -13 -19   90.69   32.80
   1 -13 -19  101.69   48.20
  -1  13  19  102.19   24.00
  -1  13  19   53.39   24.40
   1 -14 -19   89.79   43.60
   1 -14 -19  104.09   34.90
   1 -14 -19  123.79   47.70
  -1  14  19   98.39   27.60
   1 -15 -19   46.20   40.60
   1 -15 -19  200.98   52.99
   1  15 -18   48.20   19.70
   1  14 -18   11.40   14.00
   1  13 -18    6.80   12.90
   1  12 -18   51.39   17.60
  -1 -12  18   39.40   19.50
  -1 -12  18   81.69   22.60
   1  11 -18   19.10   12.80
  -1 -11  18   10.10    8.20
  -1 -11  18   -6.40   14.60
   1  10 -18   57.79   17.30
  -1 -10  18   83.79   32.30
  -1 -10  18   40.20   12.80
  -1 -10  18   47.90   27.60
   1   9 -18   24.00   13.20
  -1  -9  18   10.90    9.60
  -1  -9  18    0.10   21.00
  -1  -9  18   -2.10   19.10
   1   8 -18   29.00   14.10
  -1  -8  18   39.10   12.40
  -1  -8  18    6.30   22.50
  -1  -8  18   40.70   27.70
   1   7 -18   -0.30    9.30
  -1  -7  18   16.80   10.10
  -1  -7  18    1.40   19.40
  -1  -7  18   11.20   20.70
   1   6 -18   85.09   19.60
  -1  -6  18   57.29   15.80
  -1  -6  18  108.59   37.60
  -1  -6  18   52.79   30.50
   1   5 -18  121.59   23.60
  -1  -5  18  125.29   41.90
  -1  -5  18  160.88   24.80
  -1  -5  18  136.79   16.00
  -1  -5  18  120.39   15.30
  -1  -5  18  213.08   52.79
   1   4 -18  132.49   35.60
   1   4 -18   94.19   21.50
  -1  -4  18   52.09   32.70
  -1  -4  18  121.59   19.40
  -1  -4  18  100.59   16.60
  -1  -4  18  119.09   17.00
  -1  -4  18  109.29   42.60
  -1  -4  18  105.89   20.20
   1   3 -18   50.59   14.90
   1   3 -18   72.39   27.40
   1   3 -18   36.10   13.90
  -1  -3  18   58.29   19.20
  -1  -3  18   57.19   12.50
  -1  -3  18   58.09   14.40
  -1  -3  18   62.19   14.70
  -1  -3  18   -3.60   23.20
  -1  -3  18   83.19   13.80
  -1  -3  18   93.99   37.40
  -1  -3  18   59.49   16.00
   1   2 -18  114.29   20.20
   1   2 -18  139.49   36.20
   1   2 -18  144.49   24.10
  -1  -2  18  139.29   45.20
  -1  -2  18  214.68   53.49
  -1  -2  18  109.99   18.60
  -1  -2  18  111.59   17.50
  -1  -2  18  109.99   19.80
  -1  -2  18  111.59   20.30
  -1  -2  18  134.29   23.20
  -1  -2  18   92.69   25.50
   1   1 -18   96.69   31.40
   1   1 -18  124.59   22.60
   1   1 -18   92.49   19.00
  -1  -1  18   96.69   17.80
  -1  -1  18  115.89   43.40
  -1  -1  18  103.39   18.30
  -1  -1  18  134.79   31.20
  -1  -1  18  104.69   21.00
  -1  -1  18  165.08   26.00
  -1  -1  18  107.09   20.60
  -1  -1  18  117.89   42.80
   1   0 -18   -0.20    6.70
   1   0 -18   -2.30    8.40
   1   0 -18  -11.20   13.00
  -1   0  18  -10.10   21.30
  -1   0  18  -10.80   23.60
  -1   0  18   -1.00    7.60
  -1   0  18    2.10    9.90
  -1   0  18   -7.30   11.30
  -1   0  18   -3.80    6.20
  -1   0  18    3.00    9.20
  -1   0  18    0.40    6.10
   1  -1 -18  172.58   38.90
   1  -1 -18  147.69   24.40
   1  -1 -18  126.09   22.30
  -1   1  18  119.19   24.40
  -1   1  18  129.49   32.70
  -1   1  18   89.09   42.60
  -1   1  18  110.69   22.00
  -1   1  18  108.19   19.80
  -1   1  18  109.69   19.10
   1  -2 -18  103.59   19.70
   1  -2 -18  104.09   20.40
   1  -2 -18  132.39   34.50
  -1   2  18   70.09   25.30
  -1   2  18   79.89   19.10
  -1   2  18  102.09   19.10
  -1   2  18  113.89   24.70
  -1   2  18  114.89   19.50
   1  -3 -18   42.20   34.00
   1  -3 -18   28.40   19.80
   1  -3 -18   55.89   15.30
   1  -3 -18   59.59   15.10
  -1   3  18   53.39   18.80
  -1   3  18   58.49   15.20
  -1   3  18   51.69   16.00
  -1   3  18   59.09   24.30
  -1   3  18   73.99   17.30
   1  -4 -18   81.49   42.90
   1  -4 -18   90.09   18.30
   1  -4 -18   98.79   19.70
  -1   4  18   76.29   28.00
  -1   4  18   97.69   19.50
  -1   4  18  127.59   28.00
  -1   4  18  154.78   25.20
   1  -5 -18  237.58   59.39
   1  -5 -18   95.69   19.40
   1  -5 -18  122.79   20.00
  -1   5  18  109.49   22.50
  -1   5  18  155.38   31.30
  -1   5  18  122.69   34.50
  -1   5  18  136.19   22.40
   1  -6 -18   36.70   33.90
   1  -6 -18  130.39   56.39
  -1   6  18   83.49   31.70
  -1   6  18   37.60   15.10
  -1   6  18   51.99   15.00
  -1   6  18   85.99   24.10
   1  -7 -18    7.20   28.90
   1  -7 -18   17.40   30.20
  -1   7  18   -0.20    7.30
  -1   7  18   -5.40   12.70
  -1   7  18   12.20   20.70
  -1   7  18    9.80   10.60
   1  -8 -18   48.50   38.30
   1  -8 -18   97.59   46.20
  -1   8  18   77.69   24.70
  -1   8  18   28.60   12.90
  -1   8  18   40.20   16.00
   1  -9 -18   -0.90   12.20
   1  -9 -18   15.60   29.80
   1  -9 -18   32.00   37.00
  -1   9  18   22.60   12.40
  -1   9  18   19.70   17.70
   1 -10 -18   91.29   27.40
   1 -10 -18  101.19   46.30
   1 -10 -18  125.09   51.09
  -1  10  18  103.39   28.30
  -1  10  18   21.50   12.20
   1 -11 -18   19.90   16.40
   1 -11 -18   -1.00   32.30
   1 -11 -18   -2.50   29.50
  -1  11  18  -15.00   11.30
  -1  11  18   24.20   13.70
   1 -12 -18   87.79   44.00
   1 -12 -18   95.29   29.60
   1 -12 -18   39.70   38.00
  -1  12  18   84.79   27.80
  -1  12  18   83.49   21.60
   1 -13 -18   20.70   31.80
   1 -13 -18   59.49   38.20
   1 -13 -18    1.20   12.40
  -1  13  18  -19.80   15.60
  -1  13  18    3.60   10.60
   1 -14 -18  -13.60   15.40
   1 -14 -18   -0.40   27.20
   1 -14 -18   23.50   30.30
  -1  14  18   11.80   24.00
  -1  14  18   27.00   14.10
   1 -15 -18   71.29   39.20
   1 -15 -18   58.09   33.80
   1 -15 -18   65.09   29.20
   1  15 -17  326.67   41.90
   1  14 -17  138.99   27.00
   1  13 -17  116.49   24.90
   1  12 -17  378.96   42.80
  -1 -12  17  290.27   39.60
  -1 -12  17  327.27   41.40
   1  11 -17  434.76   46.30
  -1 -11  17  428.96   56.39
  -1 -11  17  266.77   48.00
  -1 -11  17  396.36   32.60
   1  10 -17   -1.80   10.20
  -1 -10  17   -0.90    6.90
  -1 -10  17   -6.40   15.10
  -1 -10  17    7.00   18.30
   1   9 -17  254.47   33.70
  -1  -9  17  268.77   51.09
  -1  -9  17  183.78   44.70
  -1  -9  17  315.57   32.20
   1   8 -17  656.63   52.29
  -1  -8  17  416.56   71.69
  -1  -8  17  585.84   47.20
  -1  -8  17  604.54   81.89
   1   7 -17   82.79   18.60
  -1  -7  17   63.19   31.60
  -1  -7  17   69.19   15.70
  -1  -7  17   67.19   31.00
   1   6 -17  116.39   21.50
   1   6 -17  142.59   22.70
  -1  -6  17   30.30   25.50
  -1  -6  17   87.59   35.70
  -1  -6  17   96.89   18.60
   1   5 -17  841.02   77.89
   1   5 -17  669.83   58.09
   1   5 -17  794.22   58.19
  -1  -5  17  720.23   49.50
  -1  -5  17  730.23   56.69
  -1  -5  17  753.22   97.09
  -1  -5  17  723.53   94.69
  -1  -5  17  690.03   48.80
   1   4 -17  810.42   63.19
   1   4 -17  943.31   62.99
   1   4 -17  871.11   79.99
  -1  -4  17  658.83   93.79
  -1  -4  17  810.52   61.39
  -1  -4  17  798.62  101.99
  -1  -4  17  785.62   54.69
  -1  -4  17  719.73   54.79
  -1  -4  17  762.42   56.29
  -1  -4  17  777.62   54.59
   1   3 -17  508.75   43.00
   1   3 -17  508.15   44.50
   1   3 -17  506.75   66.49
  -1  -3  17  474.55   38.90
  -1  -3  17  588.84   85.69
  -1  -3  17  514.95   37.40
  -1  -3  17  483.95   76.99
  -1  -3  17  433.06   41.60
  -1  -3  17  535.15   59.59
  -1  -3  17  470.55   40.30
  -1  -3  17  463.05   39.30
   1   2 -17 1400.96  104.89
   1   2 -17 1481.65  104.09
   1   2 -17 1531.35  123.39
  -1  -2  17 1540.95  101.79
  -1  -2  17 1532.85  105.19
  -1  -2  17 1606.74  117.09
  -1  -2  17 1510.65   99.59
  -1  -2  17 1604.14  139.19
  -1  -2  17 1537.85  103.59
  -1  -2  17 1614.14  104.99
  -1  -2  17 1473.25  135.79
   1   1 -17  520.05   45.20
   1   1 -17  601.34   48.50
   1   1 -17  626.24   73.59
  -1  -1  17  536.95   46.50
  -1  -1  17  515.95   43.60
  -1  -1  17  597.64   47.70
  -1  -1  17  531.35   42.30
  -1  -1  17  475.95   80.09
  -1  -1  17  433.76   58.39
  -1  -1  17  594.34   85.79
  -1  -1  17  553.14   47.00
   1   0 -17   10.40   16.40
   1   0 -17   -6.00    6.10
   1   0 -17    9.70   27.70
   1   0 -17   -4.70    5.20
  -1   0  17   -3.40    5.30
  -1   0  17    3.00    8.20
  -1   0  17   -6.20    8.10
  -1   0  17    3.50    6.50
  -1   0  17   -0.10   12.60
  -1   0  17    0.30   22.60
  -1   0  17   -6.50   20.20
   1  -1 -17  555.44   69.39
   1  -1 -17  548.75   45.70
   1  -1 -17  501.35   45.20
  -1   1  17  547.85   43.50
  -1   1  17  537.35   44.90
  -1   1  17  619.04   89.69
  -1   1  17  537.75   66.59
  -1   1  17  644.64   89.99
  -1   1  17  520.95   46.40
  -1   1  17  502.25   54.29
   1  -2 -17 1504.65  103.89
   1  -2 -17 1333.77  119.19
   1  -2 -17 1569.54  104.79
   1  -2 -17 1557.24  142.99
   1  -2 -17 1628.64  147.89
  -1   2  17 1532.15  105.49
  -1   2  17 1579.44  121.89
  -1   2  17 1521.85  108.99
  -1   2  17 1519.05  103.99
  -1   2  17 1499.25  102.29
   1  -3 -17  535.35   43.00
   1  -3 -17  491.55   64.79
   1  -3 -17  465.55   78.19
   1  -3 -17  464.85   40.70
   1  -3 -17  511.35   83.69
  -1   3  17  376.16   44.20
  -1   3  17  460.55   63.09
  -1   3  17  492.95   41.20
  -1   3  17  478.95   41.90
  -1   3  17  412.46   50.39
   1  -4 -17  928.51   65.79
   1  -4 -17  853.01   62.69
   1  -4 -17  973.20  120.49
   1  -4 -17  978.50  121.29
   1  -4 -17  960.10   83.59
  -1   4  17  889.71   82.79
  -1   4  17  825.52   70.79
  -1   4  17  816.02   63.29
  -1   4  17  716.33   63.39
  -1   4  17  837.42   64.69
   1  -5 -17  776.22  107.69
   1  -5 -17  667.83   98.59
   1  -5 -17  753.92   57.49
   1  -5 -17  784.72   54.99
  -1   5  17  870.71   90.99
  -1   5  17  615.04   61.59
  -1   5  17  713.93   58.79
  -1   5  17  696.13   56.19
   1  -6 -17   97.69   42.00
   1  -6 -17  126.39   45.50
  -1   6  17  128.09   27.80
  -1   6  17  115.69   20.30
  -1   6  17  106.49   21.60
  -1   6  17  130.99   35.60
   1  -7 -17  105.79   42.70
   1  -7 -17   78.79   39.90
  -1   7  17   86.89   30.30
  -1   7  17   72.99   21.20
  -1   7  17   62.69   15.70
  -1   7  17   53.09   16.40
   1  -8 -17  604.84   97.99
   1  -8 -17  929.11  115.59
  -1   8  17  532.05   63.39
  -1   8  17  613.24   50.29
  -1   8  17  558.84   51.09
   1  -9 -17  283.87   45.00
   1  -9 -17  413.56   78.79
   1  -9 -17  362.86   77.59
  -1   9  17  267.17   42.60
  -1   9  17  270.97   34.50
   1 -10 -17   -3.80    9.00
   1 -10 -17  -21.60   25.90
   1 -10 -17  -12.60   25.50
  -1  10  17   10.00    9.50
  -1  10  17    6.20   14.60
   1 -11 -17  452.35   81.79
   1 -11 -17  556.44   92.49
   1 -11 -17  319.97   52.69
  -1  11  17  454.45   47.20
  -1  11  17  340.27   51.19
   1 -12 -17  276.27   68.49
   1 -12 -17  428.26   60.59
   1 -12 -17  490.95   81.89
  -1  12  17  443.36   56.79
  -1  12  17  384.16   44.90
   1 -13 -17   66.89   38.00
   1 -13 -17   83.09   29.20
   1 -13 -17   86.49   38.30
  -1  13  17   98.89   28.10
  -1  13  17   93.89   22.20
   1 -14 -17  122.79   35.30
   1 -14 -17  141.99   45.70
   1 -14 -17  213.78   54.89
  -1  14  17  154.78   35.00
  -1  14  17  178.18   30.70
   1 -15 -17  258.17   51.99
   1 -15 -17  227.88   46.70
   1 -15 -17  231.98   55.79
  -1  15  17  239.18   36.80
   1 -16 -17   17.30   23.10
   1 -16 -17   27.40   23.30
   1  15 -16   40.30   16.40
   1  14 -16   49.70   16.10
   1  13 -16   35.60   14.50
   1  12 -16   62.29   17.20
  -1 -12  16   72.49   17.50
  -1 -12  16   70.99   17.40
   1  11 -16   72.09   17.70
  -1 -11  16   42.00   19.70
  -1 -11  16   51.09   11.10
  -1 -11  16   77.79   23.00
   1  10 -16   14.00    9.90
  -1 -10  16   -5.50   15.70
  -1 -10  16   10.80    8.10
  -1 -10  16   19.20   18.10
   1   9 -16   36.90   13.40
  -1  -9  16   58.29   13.70
  -1  -9  16   47.60   23.90
  -1  -9  16   65.69   27.80
   1   8 -16  163.48   25.50
  -1  -8  16  165.18   22.90
  -1  -8  16  153.08   40.80
  -1  -8  16  136.39   37.40
   1   7 -16   23.50   11.60
  -1  -7  16   15.50   22.80
  -1  -7  16   52.99   27.20
  -1  -7  16   45.70   12.20
   1   6 -16   98.39   28.90
   1   6 -16  155.08   22.80
   1   6 -16  132.79   23.40
  -1  -6  16   74.49   30.80
  -1  -6  16  177.78   43.60
  -1  -6  16  115.49   19.40
   1   5 -16   72.69   15.50
   1   5 -16   55.29   15.30
   1   5 -16   88.09   26.40
  -1  -5  16   49.40   12.70
  -1  -5  16   51.59   13.40
  -1  -5  16   77.09   32.20
  -1  -5  16   49.10    8.90
  -1  -5  16   56.29   28.20
  -1  -5  16   72.69   10.30
   1   4 -16  347.07   35.70
   1   4 -16  330.77   50.39
   1   4 -16  296.27   35.90
  -1  -4  16  301.67   58.59
  -1  -4  16  309.37   26.80
  -1  -4  16  261.17   55.19
  -1  -4  16  310.67   33.70
  -1  -4  16  295.27   24.90
  -1  -4  16  289.17   25.60
  -1  -4  16  329.97   34.50
  -1  -4  16  275.97   22.60
   1   3 -16   33.80   11.00
   1   3 -16   25.60   18.70
   1   3 -16   18.60   10.00
  -1  -3  16   24.20    9.70
  -1  -3  16   12.60    9.30
  -1  -3  16   38.10   10.10
  -1  -3  16   14.50   22.60
  -1  -3  16   16.60    7.50
  -1  -3  16   20.00    8.60
  -1  -3  16    5.00   21.90
  -1  -3  16   16.40   14.10
   1   2 -16  300.07   34.70
   1   2 -16  279.77   31.60
   1   2 -16  287.87   47.10
  -1  -2  16  298.27   25.70
  -1  -2  16  326.07   33.80
  -1  -2  16  309.07   58.89
  -1  -2  16  278.87   30.00
  -1  -2  16  242.18   31.30
  -1  -2  16  232.98   38.00
  -1  -2  16  218.38   51.09
  -1  -2  16  276.67   31.80
   1   1 -16   24.10   24.90
   1   1 -16   10.30   24.70
   1   1 -16   12.80    8.10
   1   1 -16   31.10   12.30
   1   1 -16    5.60   14.30
  -1  -1  16    8.50   23.50
  -1  -1  16   21.30    9.00
  -1  -1  16   22.50    8.20
  -1  -1  16   15.10    8.60
  -1  -1  16   14.20   10.00
  -1  -1  16   28.50   25.00
  -1  -1  16    4.70   12.90
  -1  -1  16   20.50   10.70
   1   0 -16    9.20   22.30
   1   0 -16   -5.20   12.00
   1   0 -16   -0.80    7.60
   1   0 -16    0.40   18.20
   1   0 -16   -2.90    5.30
  -1   0  16    3.20    6.20
  -1   0  16   27.80   22.70
  -1   0  16    1.00    7.50
  -1   0  16    3.50    6.30
  -1   0  16    2.10   12.60
  -1   0  16    4.50   20.80
  -1   0  16    8.00   10.00
   1  -1 -16   58.59   29.50
   1  -1 -16   -5.00    9.80
   1  -1 -16    1.40    5.90
   1  -1 -16   -2.10   15.70
   1  -1 -16   16.20    9.30
  -1   1  16   10.40   15.30
  -1   1  16   39.00   28.70
  -1   1  16   39.30   26.00
  -1   1  16   27.90   13.50
  -1   1  16   31.60   10.80
  -1   1  16   17.80    9.00
  -1   1  16   36.40   12.80
   1  -2 -16  265.37   57.19
   1  -2 -16  275.77   61.29
   1  -2 -16  293.87   32.80
   1  -2 -16  308.67   33.90
   1  -2 -16  320.97   48.80
  -1   2  16  278.67   31.80
  -1   2  16  313.47   47.70
  -1   2  16  264.07   33.40
  -1   2  16  323.47   63.49
  -1   2  16  233.48   34.60
  -1   2  16  265.27   30.50
  -1   2  16  294.57   61.79
   1  -3 -16   36.40   12.40
   1  -3 -16    7.40   17.00
   1  -3 -16   36.70   11.20
   1  -3 -16   34.70   27.90
   1  -3 -16    8.60   23.70
  -1   3  16   25.20   11.00
  -1   3  16   36.90   11.90
  -1   3  16   17.50   10.80
  -1   3  16   40.20   16.50
  -1   3  16   13.70   24.80
  -1   3  16    1.40   14.70
   1  -4 -16  372.06   68.79
   1  -4 -16  304.27   32.70
   1  -4 -16  247.28   31.40
   1  -4 -16  342.17   67.59
   1  -4 -16  310.27   48.50
  -1   4  16  290.77   48.50
  -1   4  16  343.37   42.60
  -1   4  16  308.67   36.30
  -1   4  16  269.67   31.50
  -1   4  16  323.27   35.70
   1  -5 -16   53.19   34.20
   1  -5 -16  101.39   40.30
   1  -5 -16  113.79   28.60
   1  -5 -16   87.69   16.70
   1  -5 -16   72.29   14.50
  -1   5  16   76.29   17.10
  -1   5  16   41.40   17.20
  -1   5  16   64.09   25.90
  -1   5  16   87.99   18.20
  -1   5  16   47.30   13.10
   1  -6 -16  117.19   43.80
   1  -6 -16  189.18   51.79
  -1   6  16   86.39   18.80
  -1   6  16  100.39   24.40
  -1   6  16   88.29   29.30
  -1   6  16   93.39   17.60
   1  -7 -16   35.70   30.70
   1  -7 -16   12.00   26.90
  -1   7  16   29.40   11.20
  -1   7  16    5.80   17.80
  -1   7  16   14.90   10.40
  -1   7  16   15.20   13.60
   1  -8 -16  213.38   57.69
   1  -8 -16  155.98   47.90
   1  -8 -16  149.39   30.90
  -1   8  16  101.59   19.80
  -1   8  16  158.48   30.40
  -1   8  16  168.78   40.50
  -1   8  16  129.99   23.90
   1  -9 -16   79.29   22.60
   1  -9 -16   51.79   35.60
   1  -9 -16   19.50   29.20
  -1   9  16   52.39   20.70
  -1   9  16   59.89   15.20
   1 -10 -16   37.80   30.60
   1 -10 -16    9.90   27.20
   1 -10 -16   27.40   17.60
  -1  10  16    1.80   13.40
  -1  10  16   12.70   10.30
   1 -11 -16   72.69   39.90
   1 -11 -16   74.69   37.40
   1 -11 -16   61.69   24.10
  -1  11  16   72.49   17.00
  -1  11  16   75.59   23.80
   1 -12 -16  167.48   49.90
   1 -12 -16   66.09   23.20
   1 -12 -16   38.80   34.50
  -1  12  16   58.19   17.00
  -1  12  16   80.29   25.50
   1 -13 -16   15.70   24.20
   1 -13 -16   39.60   22.90
   1 -13 -16   -6.50   23.70
  -1  13  16   24.00   19.30
  -1  13  16   15.30   11.20
   1 -14 -16   39.40   28.70
   1 -14 -16   50.79   22.80
   1 -14 -16   58.29   34.60
  -1  14  16  101.29   28.40
  -1  14  16   74.49   19.60
   1 -15 -16   39.10   30.90
   1 -15 -16   85.99   34.40
   1 -15 -16   64.69   28.20
  -1  15  16  114.69   32.30
  -1  15  16   58.39   18.10
   1 -16 -16   19.00   21.70
   1 -16 -16    2.50   20.10
   1 -16 -16    6.70   19.20
   1  15 -15  292.37   36.20
   1  14 -15  179.18   28.10
   1  13 -15   37.60   14.00
   1  12 -15  384.26   40.60
  -1 -12  15  369.26   31.00
  -1 -12  15  358.06   31.30
   1  11 -15  533.35   45.30
  -1 -11  15  549.15   38.10
  -1 -11  15  452.15   54.59
  -1 -11  15  455.35   55.89
   1  10 -15   46.10   14.10
  -1 -10  15   47.20   21.70
  -1 -10  15   29.00    9.40
   1   9 -15  395.66   37.90
  -1  -9  15  387.86   57.49
  -1  -9  15  435.66   61.39
  -1  -9  15  452.95   35.80
   1   8 -15  538.65   46.40
  -1  -8  15  639.04   78.59
  -1  -8  15  578.94   44.00
  -1  -8  15  486.25   68.29
   1   7 -15  301.77   34.30
  -1  -7  15  299.27   31.10
  -1  -7  15  226.18   47.20
  -1  -7  15  235.58   49.99
   1   6 -15  298.37   31.70
   1   6 -15  252.77   42.20
   1   6 -15  266.17   32.40
  -1  -6  15  265.87   24.10
  -1  -6  15  278.57   53.79
  -1  -6  15  320.07   28.80
  -1  -6  15  219.28   48.40
   1   5 -15 1337.77  103.19
   1   5 -15 1407.26   86.89
   1   5 -15 1267.57   87.19
  -1  -5  15 1241.18  112.19
  -1  -5  15 1146.09   82.09
  -1  -5  15 1199.98   77.59
  -1  -5  15 1254.27   85.19
  -1  -5  15 1089.79  108.19
  -1  -5  15 1219.18   77.89
   1   4 -15  643.84   71.19
   1   4 -15  611.54   49.60
   1   4 -15  672.63   48.90
  -1  -4  15  648.84   48.30
  -1  -4  15  601.54   43.40
  -1  -4  15  710.83   86.39
  -1  -4  15  690.83   87.09
  -1  -4  15  589.34   42.40
  -1  -4  15  454.45   50.49
  -1  -4  15  638.24   48.50
  -1  -4  15  606.64   44.30
   1   3 -15  478.45   43.90
   1   3 -15  501.45   42.90
   1   3 -15  526.75   64.39
  -1  -3  15  565.84   78.79
  -1  -3  15  555.94   40.80
  -1  -3  15  540.25   42.00
  -1  -3  15  571.44   39.10
  -1  -3  15  542.15   43.90
  -1  -3  15  391.46   51.29
  -1  -3  15  581.74   41.70
  -1  -3  15  631.74   83.39
   1   2 -15 1115.59   95.29
   1   2 -15 1033.20   80.09
   1   2 -15 1105.29   79.49
  -1  -2  15 1197.08   79.89
  -1  -2  15 1201.38   80.99
  -1  -2  15 1011.70  103.99
  -1  -2  15 1142.89   76.09
  -1  -2  15 1242.28   78.49
  -1  -2  15 1230.58   80.59
  -1  -2  15 1169.48   89.99
  -1  -2  15  975.30  103.59
   1   1 -15  434.96   40.70
   1   1 -15  443.86   60.59
   1   1 -15  545.85   76.69
   1   1 -15  603.94   81.99
   1   1 -15  487.95   40.50
  -1  -1  15  532.55   74.89
  -1  -1  15  483.65   41.50
  -1  -1  15  568.04   53.19
  -1  -1  15  548.75   40.60
  -1  -1  15  475.25   72.09
  -1  -1  15  472.25   41.90
  -1  -1  15  463.35   37.60
   1   0 -15   -9.80   12.10
   1   0 -15   -1.00   15.70
   1   0 -15    0.00    4.10
   1   0 -15   16.30   21.90
   1   0 -15    1.60    6.90
  -1   0  15   -0.90    4.90
  -1   0  15   10.90   12.90
  -1   0  15    7.90   19.00
  -1   0  15   -7.20    4.40
  -1   0  15  -15.70    6.40
  -1   0  15   26.50   24.60
  -1   0  15    0.90    7.10
   1  -1 -15  499.95   40.90
   1  -1 -15  411.26   57.89
   1  -1 -15  461.65   40.90
   1  -1 -15  607.24   81.09
  -1   1  15  526.85   40.10
  -1   1  15  533.65   77.69
  -1   1  15  536.15   76.99
  -1   1  15  486.55   40.40
  -1   1  15  500.25   42.00
  -1   1  15  494.55   44.40
  -1   1  15  441.56   56.09
   1  -2 -15 1140.69   82.19
   1  -2 -15 1155.98   97.59
   1  -2 -15 1188.28  113.39
   1  -2 -15 1213.18   82.79
   1  -2 -15 1194.58  115.09
  -1   2  15 1278.67   83.39
  -1   2  15 1088.79  109.99
  -1   2  15 1234.78  113.39
  -1   2  15 1209.98   81.49
  -1   2  15 1250.27   98.39
  -1   2  15 1191.28   87.59
  -1   2  15 1121.39   83.09
   1  -3 -15  510.55   63.59
   1  -3 -15  597.14   83.79
   1  -3 -15  530.65   42.30
   1  -3 -15  523.25   80.69
   1  -3 -15  512.25   42.50
  -1   3  15  542.95   48.60
  -1   3  15  534.45   64.29
  -1   3  15  511.35   41.60
  -1   3  15  621.94   83.89
  -1   3  15  694.23   88.79
  -1   3  15  517.85   42.80
  -1   3  15  448.26   42.60
   1  -4 -15  622.84   71.19
   1  -4 -15  728.83   49.90
   1  -4 -15  542.05   84.09
   1  -4 -15  758.72   98.69
   1  -4 -15  688.43   50.89
  -1   4  15  697.43   89.99
  -1   4  15  590.14   48.70
  -1   4  15  698.43   67.29
  -1   4  15  629.44   51.29
  -1   4  15  612.44   55.19
  -1   4  15  577.84   49.70
   1  -5 -15 1272.47   86.19
   1  -5 -15 1238.88  118.49
   1  -5 -15 1330.07  123.99
   1  -5 -15 1221.28   99.59
  -1   5  15 1206.98   92.39
  -1   5  15 1203.68  102.99
  -1   5  15 1217.78   87.49
  -1   5  15 1193.08   85.19
  -1   5  15 1327.77   87.89
   1  -6 -15  425.96   72.59
   1  -6 -15  169.88   49.50
   1  -6 -15  304.67   45.30
  -1   6  15  321.57   36.10
  -1   6  15  296.57   49.30
  -1   6  15  315.57   40.20
  -1   6  15  273.87   31.30
  -1   6  15  291.27   33.70
   1  -7 -15  351.96   64.59
   1  -7 -15  262.37   60.19
  -1   7  15  247.08   29.80
  -1   7  15  263.27   38.10
  -1   7  15  234.28   31.40
  -1   7  15  306.87   51.09
   1  -8 -15  475.65   59.79
   1  -8 -15  588.14   91.49
   1  -8 -15  538.15   85.19
  -1   8  15  617.94   49.90
  -1   8  15  555.64   47.00
  -1   8  15  653.23   56.39
  -1   8  15  645.34   77.59
   1  -9 -15  450.75   76.19
   1  -9 -15  430.96   54.19
   1  -9 -15  428.96   75.79
  -1   9  15  414.76   37.50
  -1   9  15  388.96   43.00
  -1   9  15  400.86   49.99
   1 -10 -15   31.00   18.50
   1 -10 -15   54.99   34.20
   1 -10 -15   61.09   30.40
  -1  10  15   42.80   19.10
  -1  10  15   24.80   12.20
   1 -11 -15  567.64   89.39
   1 -11 -15  566.14   68.59
   1 -11 -15  770.12   96.39
  -1  11  15  562.24   64.29
  -1  11  15  531.45   47.50
   1 -12 -15  372.76   69.59
   1 -12 -15  451.05   58.79
   1 -12 -15  383.76   73.19
  -1  12  15  369.56   41.50
  -1  12  15  421.16   53.09
   1 -13 -15   42.40   29.00
   1 -13 -15   15.60   25.00
   1 -13 -15   14.00   19.50
  -1  13  15   16.50   11.10
  -1  13  15   28.60   19.80
   1 -14 -15  154.18   37.70
   1 -14 -15  120.29   38.00
   1 -14 -15   98.79   36.70
  -1  14  15  161.48   27.20
  -1  14  15  215.08   39.00
   1 -15 -15  293.97   53.19
   1 -15 -15  341.07   55.09
   1 -15 -15  347.17   56.99
  -1  15  15  302.57   39.90
  -1  15  15  370.26   52.09
   1 -16 -15  100.09   25.20
   1 -16 -15  154.38   39.10
   1 -16 -15   93.39   24.80
  -1  16  15  143.19   29.00
   1  15 -14    9.40   11.40
   1  14 -14  -10.10    9.10
   1  13 -14   19.50   11.80
   1  12 -14   86.89   18.30
   1  11 -14   45.80   14.00
  -1 -11  14   22.50   14.00
  -1 -11  14   31.30   15.30
  -1 -11  14   46.00    8.50
   1  10 -14    6.60    8.40
  -1 -10  14   36.90    9.40
  -1 -10  14   33.90   17.30
   1   9 -14   29.40   11.90
  -1  -9  14    5.50   15.70
  -1  -9  14    4.60   15.70
  -1  -9  14   19.90    8.50
   1   8 -14  177.88   24.00
  -1  -8  14  151.38   35.60
  -1  -8  14  172.38   21.10
  -1  -8  14  151.18   36.00
   1   7 -14    4.60   12.50
   1   7 -14    6.30    7.40
  -1  -7  14   -1.60    2.40
  -1  -7  14    2.30    5.90
  -1  -7  14  -12.10   12.90
  -1  -7  14  -18.40   11.60
   1   6 -14   50.69   12.50
   1   6 -14   61.89   14.10
   1   6 -14   36.30   18.00
  -1  -6  14   28.20   23.40
  -1  -6  14   25.00   20.80
  -1  -6  14   40.90   11.10
  -1  -6  14   43.70    9.20
   1   5 -14   25.70   10.40
   1   5 -14   33.70   10.10
   1   5 -14   46.50   18.60
  -1  -5  14   50.99   12.30
  -1  -5  14   62.89   11.50
  -1  -5  14   31.60   23.90
  -1  -5  14   69.99   28.10
  -1  -5  14   50.09    7.20
  -1  -5  14   46.40    7.20
   1   4 -14  142.19   20.10
   1   4 -14  131.59   21.10
   1   4 -14  169.48   33.40
  -1  -4  14  161.38   40.20
  -1  -4  14  204.48   23.20
  -1  -4  14  184.48   28.20
  -1  -4  14  159.48   18.30
  -1  -4  14  154.98   16.60
  -1  -4  14  143.59   16.50
  -1  -4  14  183.88   41.90
  -1  -4  14  146.49   20.80
   1   3 -14   -1.70   12.20
   1   3 -14   27.50    9.50
   1   3 -14   28.60   11.20
  -1  -3  14   51.59   10.80
  -1  -3  14   45.30   26.60
  -1  -3  14   40.80   10.70
  -1  -3  14   78.49   30.00
  -1  -3  14   39.10    8.20
  -1  -3  14   40.00   11.30
  -1  -3  14   39.80   15.40
  -1  -3  14   45.60    9.60
   1   2 -14  166.58   33.10
   1   2 -14  201.08   46.20
   1   2 -14  149.19   20.80
   1   2 -14  144.39   22.00
  -1  -2  14  179.28   42.00
  -1  -2  14  188.58   23.10
  -1  -2  14  158.08   19.90
  -1  -2  14  178.98   42.10
  -1  -2  14  174.68   29.50
  -1  -2  14  170.18   22.10
  -1  -2  14  179.08   19.60
  -1  -2  14  190.98   23.80
   1   1 -14   36.00   18.90
   1   1 -14   59.89   27.90
   1   1 -14   40.90   10.70
   1   1 -14   34.20   11.30
   1   1 -14    5.70   19.80
  -1  -1  14   32.40   25.60
  -1  -1  14   70.09   20.40
  -1  -1  14   49.00   10.30
  -1  -1  14   76.99   14.40
  -1  -1  14   55.29   29.30
  -1  -1  14   34.70   12.50
  -1  -1  14   60.49   12.20
   1   0 -14    4.70   12.80
   1   0 -14  -15.80   14.70
   1   0 -14   -4.40   14.70
   1   0 -14   -1.30    3.30
   1   0 -14    7.80    8.40
  -1   0  14    2.40   10.60
  -1   0  14    5.90    7.10
  -1   0  14   -0.50    4.90
  -1   0  14    5.00    8.80
  -1   0  14   -3.50    3.80
  -1   0  14    3.50   18.70
  -1   0  14  -21.40   13.90
   1  -1 -14   50.29   12.80
   1  -1 -14   27.70    9.30
   1  -1 -14   27.20   16.90
   1  -1 -14   54.99   27.70
  -1   1  14   51.39   11.70
  -1   1  14   68.39   28.80
  -1   1  14   67.29   13.50
  -1   1  14   55.69   27.40
  -1   1  14   59.49   13.50
  -1   1  14   66.89   16.80
   1  -2 -14  147.39   42.60
   1  -2 -14  127.39   29.40
   1  -2 -14  155.58   21.10
   1  -2 -14  161.68   22.00
   1  -2 -14  172.98   45.10
  -1   2  14  191.98   23.30
  -1   2  14  132.19   20.90
  -1   2  14  143.59   19.90
  -1   2  14  177.58   43.70
  -1   2  14  201.28   45.40
  -1   2  14  195.38   34.10
  -1   2  14  208.78   28.90
   1  -3 -14   17.60    9.00
   1  -3 -14   55.59   12.70
   1  -3 -14   54.99   20.60
   1  -3 -14   36.70   25.70
   1  -3 -14   36.00   28.20
  -1   3  14   17.10   16.50
  -1   3  14   47.10   11.40
  -1   3  14   21.10   10.50
  -1   3  14   20.40   12.50
  -1   3  14   84.99   32.20
  -1   3  14   50.29   11.70
  -1   3  14   20.00   23.80
   1  -4 -14  186.38   34.60
   1  -4 -14  137.69   19.40
   1  -4 -14  130.59   19.40
   1  -4 -14  223.48   50.69
   1  -4 -14  206.98   47.70
  -1   4  14  149.88   32.10
  -1   4  14  144.99   20.30
  -1   4  14  155.08   26.30
  -1   4  14  162.48   23.00
  -1   4  14  139.19   20.50
  -1   4  14  161.68   43.40
   1  -5 -14   34.10   17.20
   1  -5 -14   49.70   30.60
   1  -5 -14   15.70   23.90
  -1   5  14   57.69   13.30
  -1   5  14   31.90   10.10
  -1   5  14   45.70   12.50
  -1   5  14   29.10   14.30
  -1   5  14   20.60   16.60
   1  -6 -14   56.19   32.30
   1  -6 -14   49.70   18.80
   1  -6 -14   35.20   25.90
  -1   6  14   41.20   12.10
  -1   6  14   62.69   23.40
  -1   6  14   68.09   13.80
  -1   6  14   51.69   17.30
  -1   6  14   32.90   12.00
   1  -7 -14  -16.80   15.60
   1  -7 -14    0.30   21.80
  -1   7  14   -0.10   13.60
  -1   7  14    5.80    7.40
  -1   7  14    3.80   10.60
  -1   7  14  -14.60    5.30
  -1   7  14    1.80    6.80
   1  -8 -14  160.78   46.10
   1  -8 -14  162.68   31.10
   1  -8 -14  231.28   54.89
  -1   8  14  179.08   24.30
  -1   8  14  166.48   24.90
  -1   8  14  180.78   38.50
  -1   8  14  202.88   32.00
   1  -9 -14   22.00   15.20
   1  -9 -14   17.90   26.40
   1  -9 -14    6.70   21.30
  -1   9  14   17.50   18.60
  -1   9  14   24.80   14.90
  -1   9  14   26.40   11.20
  -1   9  14   14.10    9.50
   1 -10 -14   36.00   19.00
   1 -10 -14   22.60   24.30
   1 -10 -14    0.90   24.20
  -1  10  14   29.00   11.70
  -1  10  14   32.70   16.80
   1 -11 -14   42.80   19.70
   1 -11 -14   36.30   27.70
   1 -11 -14   59.59   32.40
  -1  11  14   47.10   14.20
  -1  11  14   30.30   16.50
   1 -12 -14   95.19   25.50
   1 -12 -14   47.50   30.50
   1 -12 -14   66.59   33.00
  -1  12  14   52.29   18.90
  -1  12  14   55.49   15.40
   1 -13 -14   13.60   23.80
   1 -13 -14   -9.20   18.60
   1 -13 -14  -14.90   13.10
  -1  13  14    7.10    9.10
  -1  13  14   35.40   18.30
   1 -14 -14   17.50   18.90
   1 -14 -14   -6.40   18.20
   1 -14 -14    7.50   20.80
  -1  14  14    9.20   16.70
  -1  14  14   13.00   10.40
   1 -15 -14   22.60   20.20
   1 -15 -14   25.50   20.50
   1 -15 -14   45.80   25.10
  -1  15  14   49.60   16.20
  -1  15  14   43.70   22.50
   1 -16 -14   11.50   10.40
   1 -16 -14   14.80   11.30
   1 -16 -14  -21.20   15.10
  -1  16  14   30.10   22.20
  -1  16  14    9.60   11.60
   1  14 -13  181.08   25.30
   1  13 -13   34.60   12.30
   1  12 -13  343.97   32.10
   1  11 -13  326.07   31.20
  -1 -11  13  320.77   37.00
  -1 -11  13  293.67   36.50
  -1 -11  13  378.16   25.20
   1  10 -13    9.10    7.90
  -1 -10  13    7.00    5.90
  -1 -10  13    0.20   11.60
  -1 -10  13    9.70   13.30
   1   9 -13  438.06   38.30
  -1  -9  13  351.46   52.49
  -1  -9  13  436.96   56.99
  -1  -9  13  530.85   36.50
   1   8 -13  340.07   33.40
   1   8 -13  353.86   47.80
  -1  -8  13  394.76   55.19
  -1  -8  13  482.05   34.00
  -1  -8  13  400.76   56.29
   1   7 -13   19.30    8.80
   1   7 -13    3.00   11.10
  -1  -7  13   24.00   20.80
  -1  -7  13   14.70   17.70
  -1  -7  13   25.80    8.90
   1   6 -13  134.69   27.70
   1   6 -13  100.99   16.00
   1   6 -13  132.19   19.10
  -1  -6  13  108.19   12.70
  -1  -6  13   43.90   23.40
  -1  -6  13   99.59   31.00
  -1  -6  13   99.89   15.70
   1   5 -13  521.35   41.80
   1   5 -13  567.44   53.79
   1   5 -13  531.85   40.60
  -1  -5  13  530.15   33.50
  -1  -5  13  479.55   39.50
  -1  -5  13  471.15   37.30
  -1  -5  13  504.35   33.30
  -1  -5  13  488.55   67.39
  -1  -5  13  516.95   68.49
   1   4 -13  580.54   42.30
   1   4 -13  591.54   55.29
   1   4 -13  543.65   43.40
  -1  -4  13  545.55   38.60
  -1  -4  13  565.44   42.40
  -1  -4  13  497.45   36.40
  -1  -4  13  469.25   67.69
  -1  -4  13  601.74   49.20
  -1  -4  13  508.35   40.90
  -1  -4  13  708.33   79.69
  -1  -4  13  494.55   37.40
  -1  -4  13  542.25   35.20
   1   3 -13  456.15   34.50
   1   3 -13  360.56   49.30
   1   3 -13  388.36   34.40
  -1  -3  13  336.67   30.50
  -1  -3  13  449.16   33.20
  -1  -3  13  419.96   40.70
  -1  -3  13  448.06   63.89
  -1  -3  13  369.66   29.30
  -1  -3  13  423.86   31.50
  -1  -3  13  370.46   58.29
  -1  -3  13  424.06   34.40
   1   2 -13  812.72   70.29
   1   2 -13  801.92   56.69
   1   2 -13  919.41   84.39
   1   2 -13  730.53   57.19
  -1  -2  13  801.52   90.59
  -1  -2  13  902.01   82.99
  -1  -2  13  788.12   54.79
  -1  -2  13  812.12   65.29
  -1  -2  13  791.32   56.39
  -1  -2  13  711.93   56.09
  -1  -2  13  749.62   53.19
  -1  -2  13  808.72   56.99
   1   1 -13 1217.48   95.39
   1   1 -13 1098.59   81.39
   1   1 -13 1307.27   81.79
   1   1 -13 1275.47  107.99
   1   1 -13 1350.46  110.09
  -1  -1  13 1066.09  102.49
  -1  -1  13 1116.09  104.09
  -1  -1  13 1354.16   93.09
  -1  -1  13 1172.58   79.79
  -1  -1  13 1196.68   78.69
  -1  -1  13 1124.69   81.89
  -1  -1  13 1201.88   81.89
   1   0 -13    2.30    3.10
   1   0 -13   -3.30    5.10
   1   0 -13   -8.70   13.10
   1   0 -13   22.00   15.00
   1   0 -13  -15.10   14.50
  -1   0  13    8.30    6.20
  -1   0  13   -4.30    8.80
  -1   0  13   -0.40    4.40
  -1   0  13   -2.30    6.30
  -1   0  13    3.30   17.30
  -1   0  13    8.40   17.90
  -1   0  13    1.70    4.30
   1  -1 -13 1214.28  106.89
   1  -1 -13 1202.88   94.99
   1  -1 -13 1219.88   80.59
   1  -1 -13 1088.49   80.09
  -1   1  13 1231.58   80.59
  -1   1  13 1319.37  109.29
  -1   1  13 1214.48   93.29
  -1   1  13  922.21   98.09
  -1   1  13 1249.77   81.89
  -1   1  13 1251.57   79.49
  -1   1  13 1117.99   83.09
   1  -2 -13  781.92   70.89
   1  -2 -13  733.43   56.79
   1  -2 -13  835.92   93.09
   1  -2 -13  796.02   57.19
   1  -2 -13  863.01   97.39
  -1   2  13  821.42   70.79
  -1   2  13  776.12   90.99
  -1   2  13  824.82   93.89
  -1   2  13  801.72   61.89
  -1   2  13  734.33   55.59
  -1   2  13  870.11   59.29
  -1   2  13  819.12   57.49
   1  -3 -13  379.96   33.10
   1  -3 -13  378.46   64.79
   1  -3 -13  401.26   63.29
   1  -3 -13  342.37   48.30
   1  -3 -13  404.46   33.10
  -1   3  13  482.75   55.09
  -1   3  13  403.06   43.10
  -1   3  13  456.95   66.69
  -1   3  13  374.36   60.99
  -1   3  13  387.46   33.40
  -1   3  13  365.86   33.90
  -1   3  13  436.26   33.40
   1  -4 -13  590.34   43.30
   1  -4 -13  549.25   77.99
   1  -4 -13  747.13   86.89
   1  -4 -13  514.45   40.80
   1  -4 -13  594.34   62.99
  -1   4  13  527.35   43.50
  -1   4  13  538.95   42.90
  -1   4  13  549.15   42.20
  -1   4  13  527.45   47.10
  -1   4  13  499.45   61.19
  -1   4  13  525.05   72.99
   1  -5 -13  526.85   73.29
   1  -5 -13  552.84   59.29
   1  -5 -13  600.44   82.29
  -1   5  13  523.15   40.90
  -1   5  13  520.85   61.69
  -1   5  13  519.95   41.60
  -1   5  13  522.95   42.40
  -1   5  13  425.46   48.40
   1  -6 -13  126.89   25.40
   1  -6 -13  191.48   46.90
   1  -6 -13   63.59   30.30
  -1   6  13   85.19   26.50
  -1   6  13   68.49   13.80
  -1   6  13   83.89   16.30
  -1   6  13   89.29   16.30
  -1   6  13   84.89   20.50
   1  -7 -13    1.70   10.90
   1  -7 -13   -2.20   20.30
   1  -7 -13    5.40   20.90
  -1   7  13   25.10   10.10
  -1   7  13    5.90   14.60
  -1   7  13   26.70    9.30
  -1   7  13   23.50   13.30
  -1   7  13   18.40    9.90
   1  -8 -13  352.96   63.99
   1  -8 -13  308.57   45.80
   1  -8 -13  436.16   72.69
  -1   8  13  485.85   39.80
  -1   8  13  493.65   50.69
  -1   8  13  568.24   66.19
  -1   8  13  503.15   40.20
  -1   8  13  442.36   37.50
   1  -9 -13  363.36   48.60
   1  -9 -13  386.16   66.99
   1  -9 -13  419.26   70.99
  -1   9  13  505.25   61.89
  -1   9  13  433.76   37.70
  -1   9  13  425.06   48.20
  -1   9  13  385.36   34.90
   1 -10 -13    3.00   19.40
   1 -10 -13    9.70   21.30
   1 -10 -13    0.20   12.40
  -1  10  13   10.10    7.50
  -1  10  13   15.70   13.60
   1 -11 -13  375.76   64.59
   1 -11 -13  357.46   63.79
   1 -11 -13  350.96   50.39
  -1  11  13  352.66   33.40
  -1  11  13  366.86   45.80
   1 -12 -13  357.06   62.99
   1 -12 -13  381.46   61.69
   1 -12 -13  372.36   52.99
  -1  12  13  339.27   38.00
  -1  12  13  439.16   49.70
   1 -13 -13   27.00   18.50
   1 -13 -13   40.20   25.50
   1 -13 -13   38.70   24.80
  -1  13  13   37.20   18.50
  -1  13  13   22.40   11.30
   1 -14 -13  161.58   36.30
   1 -14 -13  150.18   37.30
   1 -14 -13  112.79   32.20
  -1  14  13  105.39   27.60
  -1  14  13  132.69   22.50
   1 -15 -13  293.17   43.20
   1 -15 -13  318.97   45.60
   1 -15 -13  293.87   49.99
  -1  15  13  215.38   38.20
  -1  15  13  261.57   34.80
   1 -16 -13   70.49   28.90
  -1  16  13   56.89   17.30
  -1  16  13   57.29   25.20
   1 -17 -13   38.40   25.00
   1  13 -12   -9.70    6.10
   1  12 -12   26.00   10.00
   1  11 -12   25.00    9.90
  -1 -11  12   45.10    5.10
  -1 -11  12   64.59   12.90
  -1 -11  12   36.10   10.50
   1  10 -12   67.49   13.90
  -1 -10  12   75.49   19.80
  -1 -10  12   65.29   10.20
  -1 -10  12   36.80   16.50
   1   9 -12   38.40   16.40
   1   9 -12   33.40   10.30
  -1  -9  12   30.60   10.50
  -1  -9  12    8.80   13.80
  -1  -9  12   30.10    7.90
   1   8 -12  402.06   48.70
   1   8 -12  466.25   36.10
  -1  -8  12  412.26   33.50
  -1  -8  12  393.36   54.39
  -1  -8  12  547.45   61.79
   1   7 -12   44.30   11.80
   1   7 -12   93.79   13.50
   1   7 -12   67.29   15.50
   1   7 -12   61.69   13.50
  -1  -7  12   86.39   13.70
  -1  -7  12   59.09   23.90
  -1  -7  12   63.29   24.70
   1   6 -12    0.30    4.80
   1   6 -12    6.60    6.80
   1   6 -12   -1.60    6.60
   1   6 -12    2.80    5.20
   1   6 -12   -4.10    9.40
  -1  -6  12   -1.10   13.60
  -1  -6  12   -2.60    4.60
  -1  -6  12    6.30   15.40
  -1  -6  12   -1.50    2.90
   1   5 -12  285.37   38.10
   1   5 -12  259.17   27.80
   1   5 -12  299.67   24.80
  -1  -5  12  214.88   20.60
  -1  -5  12  220.18   41.20
  -1  -5  12  285.57   24.20
  -1  -5  12  242.48   44.80
  -1  -5  12  244.98   16.70
  -1  -5  12  250.67   16.70
   1   4 -12  216.28   25.10
   1   4 -12  181.98   22.40
   1   4 -12  193.98   32.40
  -1  -4  12  187.58   16.00
  -1  -4  12  180.88   21.60
  -1  -4  12  215.78   28.20
  -1  -4  12  238.28   43.20
  -1  -4  12  240.28   24.60
  -1  -4  12  225.88   15.20
  -1  -4  12  214.08   41.10
  -1  -4  12  209.48   17.60
  -1  -4  12  203.68   18.00
   1   3 -12   19.60   13.30
   1   3 -12   33.50   10.50
   1   3 -12   40.20    9.70
  -1  -3  12   24.90   19.40
  -1  -3  12   47.40    9.40
  -1  -3  12   22.60    7.00
  -1  -3  12   32.50    6.90
  -1  -3  12   40.60   22.00
  -1  -3  12   38.30    8.70
  -1  -3  12   31.20   12.30
  -1  -3  12   21.50    8.10
   1   2 -12  238.78   24.20
   1   2 -12  271.37   39.10
   1   2 -12  297.37   50.09
   1   2 -12  234.48   28.00
  -1  -2  12  284.67   25.40
  -1  -2  12  302.47   50.09
  -1  -2  12  280.67   35.50
  -1  -2  12  255.37   46.40
  -1  -2  12  286.57   22.80
  -1  -2  12  281.97   25.80
  -1  -2  12  296.07   25.90
  -1  -2  12  315.47   24.60
   1   1 -12  231.58   34.20
   1   1 -12  146.29   20.00
   1   1 -12  151.58   36.30
   1   1 -12  219.28   22.30
   1   1 -12  222.18   42.40
  -1  -1  12  190.38   38.90
  -1  -1  12  109.59   18.30
  -1  -1  12  154.48   18.60
  -1  -1  12   97.59   29.00
  -1  -1  12  140.19   19.10
  -1  -1  12  114.19   23.50
  -1  -1  12  129.79   16.30
   1   0 -12    9.90   16.50
   1   0 -12    1.80    5.50
   1   0 -12   -1.30    1.60
   1   0 -12   -1.80   10.80
   1   0 -12  -16.90   13.10
  -1   0  12   -8.70   12.10
  -1   0  12    2.20    9.60
  -1   0  12    0.30    4.30
  -1   0  12   -1.80    5.00
  -1   0  12   -5.30    3.30
  -1   0  12    3.70   15.20
  -1   0  12   -1.80    6.20
   1  -1 -12   85.99   29.10
   1  -1 -12   32.80   18.70
   1  -1 -12  130.49   26.60
   1  -1 -12  164.18   20.00
   1  -1 -12  175.48   19.40
  -1   1  12  145.29   35.70
  -1   1  12  116.79   15.60
  -1   1  12  113.49   16.40
  -1   1  12  132.09   18.50
  -1   1  12  170.58   23.10
  -1   1  12  116.99   24.30
   1  -2 -12  296.07   25.90
   1  -2 -12  264.67   24.80
   1  -2 -12  266.87   48.30
   1  -2 -12  305.07   53.59
   1  -2 -12  266.07   39.90
  -1   2  12  278.47   25.30
  -1   2  12  298.97   51.39
  -1   2  12  250.57   37.40
  -1   2  12  278.87   49.30
  -1   2  12  277.47   32.70
  -1   2  12  284.47   24.60
  -1   2  12  271.07   29.10
   1  -3 -12   43.10   24.80
   1  -3 -12   38.60   10.00
   1  -3 -12   22.40    8.00
   1  -3 -12   33.20   21.70
   1  -3 -12   20.40   14.60
  -1   3  12   36.00   22.10
  -1   3  12   31.90    9.20
  -1   3  12   48.40   23.90
  -1   3  12   34.60   12.60
  -1   3  12   43.50   11.40
  -1   3  12   25.60    8.10
  -1   3  12   45.80   17.20
   1  -4 -12  246.18   36.20
   1  -4 -12  168.88   40.30
   1  -4 -12  168.28   20.70
   1  -4 -12  188.88   22.30
   1  -4 -12  188.38   42.60
  -1   4  12  239.68   44.80
  -1   4  12  225.58   23.70
  -1   4  12  250.47   26.10
  -1   4  12  225.18   29.20
  -1   4  12  170.38   22.90
  -1   4  12  236.38   37.10
   1  -5 -12  180.48   44.10
   1  -5 -12  261.77   49.99
   1  -5 -12  303.67   38.60
  -1   5  12  222.68   25.00
  -1   5  12  242.28   27.70
  -1   5  12  253.17   27.50
  -1   5  12  243.18   31.20
  -1   5  12  239.38   38.80
   1  -6 -12   -7.70   18.00
   1  -6 -12   -1.80    8.90
   1  -6 -12  -20.10   14.60
  -1   6  12   -3.30    4.00
  -1   6  12  -11.10   10.80
  -1   6  12   -3.40    4.90
  -1   6  12    2.20    5.60
  -1   6  12  -11.30    6.00
   1  -7 -12   41.20   16.50
   1  -7 -12   55.29   27.40
   1  -7 -12    9.90   22.70
  -1   7  12   92.69   15.90
  -1   7  12  102.49   17.20
  -1   7  12   69.39   18.40
  -1   7  12   81.79   14.00
  -1   7  12   79.69   25.20
   1  -8 -12  420.56   49.80
   1  -8 -12  446.26   67.79
   1  -8 -12  400.66   43.60
   1  -8 -12  471.05   70.19
  -1   8  12  463.15   37.10
  -1   8  12  383.86   53.59
  -1   8  12  413.96   45.40
  -1   8  12  366.56   33.50
  -1   8  12  432.46   36.60
   1  -9 -12   17.70   11.90
   1  -9 -12   44.50   25.40
   1  -9 -12   16.30   22.40
  -1   9  12   44.90   11.30
  -1   9  12   29.40   11.30
  -1   9  12   22.90   13.10
  -1   9  12   44.80   12.10
  -1   9  12   38.00   19.10
   1 -10 -12   72.79   33.40
   1 -10 -12  121.49   26.30
   1 -10 -12   59.19   11.00
   1 -10 -12   66.49    8.90
   1 -10 -12   88.29   32.20
  -1  10  12   62.99   13.70
  -1  10  12   93.99   21.40
  -1  10  12  111.49   33.50
   1 -11 -12   29.50   20.50
   1 -11 -12   52.49   26.90
   1 -11 -12   29.30   17.20
  -1  11  12   52.49   12.90
  -1  11  12   54.49   17.60
   1 -12 -12   30.40   18.40
   1 -12 -12   35.30   22.50
   1 -12 -12   43.70   27.30
  -1  12  12   59.49   14.20
  -1  12  12   80.69   21.70
   1 -13 -12    8.90   14.60
   1 -13 -12    4.60   16.30
   1 -13 -12   19.10   19.90
  -1  13  12    8.50    8.60
  -1  13  12   21.30   16.00
   1 -14 -12   78.29   24.20
   1 -14 -12   35.30   21.40
   1 -14 -12   46.70   21.60
  -1  14  12   76.59   22.70
  -1  14  12   49.60   14.40
   1 -15 -12   64.09   18.50
   1 -15 -12   63.69   18.80
   1 -15 -12   85.49   28.80
  -1  15  12   96.09   19.10
  -1  15  12   60.69   22.80
   1 -16 -12   18.00   20.40
  -1  16  12   -1.00    9.20
  -1  16  12  -17.20   12.90
   1 -17 -12   12.70   19.80
  -1  17  12  -15.70   18.20
  -1  17  12   15.90   11.80
   1  14 -11  125.89   18.10
   1  13 -11   41.40   11.10
   1  12 -11  432.16   34.30
   1  11 -11  399.36   32.00
   1  10 -11   42.70   10.50
  -1 -10  11   53.99    8.10
  -1 -10  11   49.40    8.00
  -1 -10  11   64.19   16.40
  -1 -10  11   29.30   13.50
   1   9 -11  365.66   31.60
   1   9 -11  386.86   44.90
  -1  -9  11  370.16   47.10
  -1  -9  11  420.66   30.50
  -1  -9  11  440.86   30.50
   1   8 -11 1643.84  109.59
   1   8 -11 1689.43  120.09
   1   8 -11 1848.62  115.79
  -1  -8  11 1579.84  125.09
  -1  -8  11 1813.22  108.99
  -1  -8  11 1703.53  125.79
   1   7 -11  258.97   22.70
   1   7 -11  248.78   24.30
   1   7 -11  267.27   35.70
   1   7 -11  295.87   24.90
   1   7 -11  296.47   26.70
  -1  -7  11  284.27   24.00
  -1  -7  11  237.18   40.60
  -1  -7  11  294.47   43.50
   1   6 -11  619.94   42.10
   1   6 -11  622.94   44.60
   1   6 -11  573.44   51.19
   1   6 -11  581.44   42.30
   1   6 -11  571.94   40.20
  -1  -6  11  518.15   35.80
  -1  -6  11  490.55   62.69
  -1  -6  11  512.05   62.69
  -1  -6  11  541.45   40.80
   1   5 -11 2034.10  117.09
   1   5 -11 1974.50  118.09
   1   5 -11 1693.33  117.59
   1   5 -11 1893.81  128.59
   1   5 -11 1787.42  119.99
  -1  -5  11 1806.82  114.39
  -1  -5  11 1880.91  117.59
  -1  -5  11 1796.52  137.69
  -1  -5  11 1724.73  136.09
   1   4 -11  307.77   27.80
   1   4 -11  341.67   30.70
   1   4 -11  314.67   39.80
   1   4 -11  370.36   27.10
   1   4 -11  303.37   27.00
  -1  -4  11  343.37   20.90
  -1  -4  11  333.27   27.60
  -1  -4  11  327.17   20.90
  -1  -4  11  329.57   50.39
  -1  -4  11  295.37   26.00
  -1  -4  11  329.07   24.40
  -1  -4  11  331.07   24.00
  -1  -4  11  268.87   46.10
   1   3 -11   31.20    9.10
   1   3 -11   33.70    8.20
   1   3 -11   31.90   15.10
  -1  -3  11   21.90    6.00
  -1  -3  11   45.70    8.50
  -1  -3  11   45.80   20.40
  -1  -3  11   39.80    6.90
  -1  -3  11   28.10   18.20
  -1  -3  11   32.90    7.70
  -1  -3  11   27.50   10.70
  -1  -3  11   27.20    8.30
   1   2 -11 1525.65  108.89
   1   2 -11 1199.38   82.89
   1   2 -11 1400.66   82.99
   1   2 -11 1438.66  107.29
   1   2 -11 1423.56   96.19
  -1  -2  11 1216.98   81.69
  -1  -2  11 1183.78  101.99
  -1  -2  11 1178.48   80.29
  -1  -2  11 1168.28   88.69
  -1  -2  11 1154.58  100.69
  -1  -2  11 1183.08   79.19
  -1  -2  11 1218.48   82.39
   1   1 -11 1172.08   92.39
   1   1 -11 1141.79   92.49
   1   1 -11 1015.20   68.39
   1   1 -11  963.70   69.19
   1   1 -11  935.21   78.69
  -1  -1  11 1013.60   69.79
  -1  -1  11 1068.19   68.09
  -1  -1  11 1026.10   89.59
  -1  -1  11 1037.30   77.19
  -1  -1  11  991.80   66.39
  -1  -1  11 1035.20   89.49
  -1  -1  11  972.30   68.79
   1   0 -11   12.60   14.20
   1   0 -11    3.20    9.20
   1   0 -11   -1.10    4.50
   1   0 -11    1.80   13.10
   1   0 -11   -2.00    1.30
  -1   0  11   -9.70    9.70
  -1   0  11    1.60    5.90
  -1   0  11    0.80    3.40
  -1   0  11    0.30    7.70
  -1   0  11   -0.70    3.90
  -1   0  11   -4.60   10.70
  -1   0  11    1.10    3.30
   1  -1 -11 1014.80   68.19
   1  -1 -11 1011.10   89.49
   1  -1 -11 1035.20   69.09
   1  -1 -11 1065.29   80.89
  -1   1  11 1039.20   71.89
  -1   1  11  967.90   88.79
  -1   1  11  973.90   66.89
  -1   1  11  988.40   67.89
  -1   1  11 1006.20   78.49
  -1   1  11 1019.60   69.09
   1  -2 -11 1377.36  107.79
   1  -2 -11 1300.97   82.99
   1  -2 -11 1377.06   96.39
   1  -2 -11 1412.86   83.89
   1  -2 -11 1268.37  107.59
  -1   2  11 1238.48  104.79
  -1   2  11 1164.58   93.19
  -1   2  11 1248.48   83.69
  -1   2  11 1125.49   81.29
  -1   2  11 1118.79   85.29
  -1   2  11 1297.17  104.99
  -1   2  11 1267.07   82.89
   1  -3 -11   33.10    8.30
   1  -3 -11   32.70   21.60
   1  -3 -11   37.00   15.00
   1  -3 -11   32.30    8.90
   1  -3 -11   46.30   21.60
  -1   3  11   35.10    9.50
  -1   3  11   31.90   19.40
  -1   3  11   30.70   11.40
  -1   3  11   45.50   21.40
  -1   3  11   39.30    9.40
  -1   3  11   47.60   10.00
  -1   3  11   42.80   16.10
   1  -4 -11  360.96   27.50
   1  -4 -11  341.67   28.30
   1  -4 -11  332.77   56.29
   1  -4 -11  342.57   54.49
   1  -4 -11  300.67   40.00
  -1   4  11  346.27   53.59
  -1   4  11  343.07   29.60
  -1   4  11  367.46   29.40
  -1   4  11  321.27   27.60
  -1   4  11  327.97   36.30
  -1   4  11  290.77   41.80
   1  -5 -11 1916.71  149.19
   1  -5 -11 1834.22  129.89
   1  -5 -11 1904.61  146.09
  -1   5  11 1908.21  121.69
  -1   5  11 1794.02  119.39
  -1   5  11 1804.62  133.79
  -1   5  11 1987.90  121.39
  -1   5  11 1936.81  125.29
   1  -6 -11  632.24   37.40
   1  -6 -11  675.13   79.49
   1  -6 -11  638.84   51.79
   1  -6 -11  536.95   73.89
  -1   6  11  521.15   46.60
  -1   6  11  577.94   43.70
  -1   6  11  452.25   56.89
  -1   6  11  515.65   41.70
  -1   6  11  538.65   43.70
   1  -7 -11  303.57   52.99
   1  -7 -11  192.38   45.10
   1  -7 -11  289.17   37.50
   1  -7 -11  254.87   33.90
  -1   7  11  289.67   27.30
  -1   7  11  380.86   38.90
  -1   7  11  299.07   26.00
  -1   7  11  295.37   27.00
  -1   7  11  302.87   43.90
   1  -8 -11 1633.24  135.89
   1  -8 -11 1526.35  135.99
   1  -8 -11 1587.94  113.99
   1  -8 -11 1655.43  120.49
  -1   8  11 1822.62  112.69
  -1   8  11 1867.41  129.09
  -1   8  11 1610.54  109.89
  -1   8  11 1869.21  117.39
  -1   8  11 1785.52  112.79
   1  -9 -11  364.06   60.09
   1  -9 -11  417.56   62.09
   1  -9 -11  375.66   32.30
   1  -9 -11  320.57   43.50
  -1   9  11  373.76   33.50
  -1   9  11  368.26   31.70
  -1   9  11  438.56   38.80
  -1   9  11  381.76   36.70
  -1   9  11  362.56   50.49
   1 -10 -11   54.99   26.30
   1 -10 -11   41.50   24.50
   1 -10 -11   48.00   18.40
  -1  10  11   30.70   10.00
  -1  10  11   43.40   20.00
  -1  10  11   43.60   15.40
   1 -11 -11  513.75   64.69
   1 -11 -11  374.36   49.40
   1 -11 -11  296.17   52.99
  -1  11  11  324.57   31.00
  -1  11  11  415.26   44.10
   1 -12 -11  369.96   58.49
   1 -12 -11  502.15   58.69
   1 -12 -11  454.75   61.29
  -1  12  11  415.16   46.60
  -1  12  11  413.06   36.00
   1 -13 -11   43.70   21.70
   1 -13 -11   35.10   22.10
   1 -13 -11   36.40   20.40
  -1  13  11   55.39   13.70
  -1  13  11   70.69   20.90
   1 -14 -11  140.99   29.80
   1 -14 -11  160.18   35.20
   1 -14 -11  129.09   29.60
  -1  14  11  112.39   25.80
  -1  14  11  143.99   22.10
   1 -15 -11  489.75   63.19
  -1  15  11  417.56   50.89
  -1  15  11  377.36   40.90
   1 -16 -11   65.49   27.00
  -1  16  11   36.80   13.00
  -1  16  11   58.29   21.60
   1 -17 -11   37.80   23.50
  -1  17  11   52.49   16.10
   1  14 -10   13.10    9.80
   1  13 -10   21.00    7.70
   1  12 -10   78.29   12.60
   1  11 -10   52.69    9.80
   1  10 -10   29.80    8.00
   1  10 -10   26.00   11.60
  -1 -10  10   17.60    9.20
  -1 -10  10   19.60    4.60
  -1 -10  10   16.70    4.20
  -1 -10  10   29.90   10.70
   1   9 -10  131.19   15.80
   1   9 -10  126.79   22.50
  -1  -9  10  126.29   23.50
  -1  -9  10   76.99   20.30
  -1  -9  10  139.49   14.10
  -1  -9  10  126.79   14.00
   1   8 -10  336.47   37.70
   1   8 -10  329.77   27.20
   1   8 -10  313.87   24.60
   1   8 -10  301.87   25.60
  -1  -8  10  349.96   25.80
  -1  -8  10  265.27   39.20
  -1  -8  10  317.47   42.90
   1   7 -10  265.17   21.20
   1   7 -10  235.18   24.30
   1   7 -10  252.77   19.40
   1   7 -10  212.78   29.80
   1   7 -10  209.68   19.90
  -1  -7  10  191.28   19.20
  -1  -7  10  142.19   31.10
  -1  -7  10  206.78   35.40
   1   6 -10   41.60    8.80
   1   6 -10   46.90   14.50
   1   6 -10   52.99   11.20
   1   6 -10   60.09    9.60
   1   6 -10   61.59   11.00
  -1  -6  10   54.29    9.90
  -1  -6  10   62.89   21.90
  -1  -6  10   51.79   19.10
   1   5 -10  355.26   40.50
   1   5 -10  332.87   30.20
   1   5 -10  328.97   29.00
   1   5 -10  350.16   28.70
   1   5 -10  418.16   28.60
  -1  -5  10  391.66   29.50
  -1  -5  10  379.56   50.59
  -1  -5  10  389.76   26.40
  -1  -5  10  341.97   48.30
   1   4 -10  253.27   19.70
   1   4 -10  270.87   27.60
   1   4 -10  207.38   19.50
   1   4 -10  193.48   21.80
   1   4 -10  199.08   29.40
  -1  -4  10  218.08   16.50
  -1  -4  10  182.88   18.00
  -1  -4  10  206.68   16.60
  -1  -4  10  222.78   38.00
  -1  -4  10  293.77   42.40
  -1  -4  10  219.38   20.00
   1   3 -10  265.07   24.50
   1   3 -10  258.27   35.40
   1   3 -10  293.67   26.70
   1   3 -10  305.87   23.30
   1   3 -10  268.57   23.50
  -1  -3  10  280.17   21.90
  -1  -3  10  339.77   47.40
  -1  -3  10  287.07   24.30
  -1  -3  10  270.77   21.90
  -1  -3  10  269.97   20.50
  -1  -3  10  293.37   23.00
  -1  -3  10  283.87   42.80
   1   2 -10   92.49   25.80
   1   2 -10  105.09   17.30
   1   2 -10  113.59   21.80
   1   2 -10   68.39   12.80
   1   2 -10   68.79   23.90
   1   2 -10   89.09   13.00
  -1  -2  10  110.69   14.70
  -1  -2  10   81.79   24.90
  -1  -2  10  106.89   12.90
  -1  -2  10  104.29   18.30
  -1  -2  10   99.99   11.90
  -1  -2  10  100.09   26.30
  -1  -2  10  124.19   15.40
   1   1 -10  538.15   61.49
   1   1 -10  453.05   32.00
   1   1 -10  488.55   43.00
   1   1 -10  473.35   56.29
   1   1 -10  426.26   32.70
  -1  -1  10  393.56   54.49
  -1  -1  10  402.26   30.70
  -1  -1  10  488.75   58.39
  -1  -1  10  416.46   32.80
  -1  -1  10  349.96   40.70
  -1  -1  10  390.66   29.60
  -1  -1  10  304.97   30.20
   1   0 -10   12.10   10.20
   1   0 -10   -8.70    9.60
   1   0 -10    8.70   13.20
   1   0 -10   -5.10    3.20
   1   0 -10   -0.50    1.40
   1   0 -10    3.90    4.50
  -1   0  10   -6.50   10.50
  -1   0  10    2.60    6.90
  -1   0  10   -0.80   12.50
  -1   0  10    3.30    3.50
  -1   0  10    1.30    5.50
  -1   0  10   -0.80    3.00
  -1   0  10    5.20    4.80
   1  -1 -10  410.96   55.19
   1  -1 -10  450.55   32.00
   1  -1 -10  431.76   30.90
   1  -1 -10  345.07   51.09
   1  -1 -10  390.36   30.90
   1  -1 -10  446.36   41.70
  -1   1  10  314.57   31.90
  -1   1  10  360.66   30.70
  -1   1  10  366.76   29.30
  -1   1  10  372.36   52.69
  -1   1  10  336.07   41.40
  -1   1  10  401.16   30.40
   1  -2 -10   99.89   14.30
   1  -2 -10   81.59   26.70
   1  -2 -10   70.69   19.40
   1  -2 -10  106.29   27.60
   1  -2 -10   86.19   13.10
  -1   2  10  120.39   18.30
  -1   2  10  157.28   33.40
  -1   2  10  144.49   32.10
  -1   2  10  133.99   16.10
  -1   2  10   88.19   14.40
  -1   2  10  127.49   15.10
  -1   2  10  109.09   22.00
   1  -3 -10  293.87   47.30
   1  -3 -10  358.96   53.59
   1  -3 -10  321.07   38.70
   1  -3 -10  302.27   24.50
   1  -3 -10  274.47   24.20
  -1   3  10  392.56   52.99
  -1   3  10  322.27   49.00
  -1   3  10  310.57   24.60
  -1   3  10  267.67   37.00
  -1   3  10  299.07   25.50
  -1   3  10  259.17   24.20
  -1   3  10  241.28   29.90
   1  -4 -10  227.88   41.00
   1  -4 -10  208.98   31.20
   1  -4 -10  234.98   20.80
   1  -4 -10  227.38   44.10
   1  -4 -10  215.18   19.00
  -1   4  10  196.38   32.50
  -1   4  10  227.68   20.30
  -1   4  10  228.18   21.00
  -1   4  10  208.68   23.70
  -1   4  10  218.18   26.80
  -1   4  10  213.58   40.90
   1  -5 -10  432.46   59.79
   1  -5 -10  343.27   40.70
   1  -5 -10  371.56   54.29
  -1   5  10  376.36   33.80
  -1   5  10  349.17   30.80
  -1   5  10  404.76   30.40
  -1   5  10  384.96   30.90
  -1   5  10  389.36   46.50
   1  -6 -10   51.69   14.60
   1  -6 -10   50.39    4.40
   1  -6 -10   32.30   20.80
   1  -6 -10   70.39   26.50
   1  -6 -10   43.90    6.30
   1  -6 -10   45.80    4.90
  -1   6  10   23.50   15.10
  -1   6  10   36.80    9.40
  -1   6  10   16.70    7.80
  -1   6  10   65.09   15.10
  -1   6  10   50.19   10.20
   1  -7 -10  196.98   43.30
   1  -7 -10  233.78   29.30
   1  -7 -10  236.28   32.40
   1  -7 -10  215.58   42.10
  -1   7  10  243.88   26.30
  -1   7  10  197.08   22.70
  -1   7  10  235.78   25.70
  -1   7  10  250.87   38.00
  -1   7  10  243.48   29.40
   1  -8 -10  280.27   51.09
   1  -8 -10  316.87   30.40
   1  -8 -10  272.57   37.40
   1  -8 -10  202.98   45.10
  -1   8  10  413.56   30.90
  -1   8  10  383.16   38.10
  -1   8  10  341.47   28.00
  -1   8  10  356.76   46.00
  -1   8  10  283.07   27.80
   1  -9 -10  137.09   14.90
   1  -9 -10   97.29   22.50
   1  -9 -10  127.89   35.50
   1  -9 -10  129.09   33.00
  -1   9  10  122.89   21.70
  -1   9  10  114.89   18.00
  -1   9  10  119.29   27.40
  -1   9  10  146.39   18.80
   1 -10 -10   37.60   21.90
   1 -10 -10   14.70   18.50
   1 -10 -10   25.90   15.50
  -1  10  10   16.40   11.00
  -1  10  10   20.00    8.30
  -1  10  10   40.40   18.10
   1 -11 -10   37.10   17.50
   1 -11 -10   25.10   20.00
   1 -11 -10   18.90   19.40
  -1  11  10   31.10    9.70
  -1  11  10   51.99   15.00
   1 -12 -10   56.59   22.40
   1 -12 -10   77.79   25.40
   1 -12 -10   48.90   20.40
  -1  12  10   68.69   18.50
  -1  12  10   34.30   10.40
   1 -13 -10   26.70   17.20
   1 -13 -10    9.40   15.80
   1 -13 -10   19.00   16.70
  -1  13  10    3.30   11.90
  -1  13  10   19.20    8.90
   1 -14 -10   28.30   16.20
   1 -14 -10   -3.80   10.80
   1 -14 -10   14.70   12.80
  -1  14  10   15.10    8.90
  -1  14  10   21.00   14.30
   1 -15 -10   53.49   22.90
  -1  15  10   49.50   13.40
  -1  15  10   54.19   18.70
   1 -16 -10   -7.30   16.40
  -1  16  10   10.20    9.40
  -1  16  10    1.30   12.80
   1 -17 -10   28.70   21.60
  -1  17  10   18.30   11.00
  -1  18  10   16.70   13.50
   1  13  -9   34.50    8.20
   1  12  -9  522.85   36.70
   1  11  -9  363.26   26.90
   1  10  -9    6.90    8.40
   1  10  -9   13.00    5.00
  -1 -10   9   10.30    5.20
  -1 -10   9   13.90    5.40
   1   9  -9  882.61   59.79
   1   9  -9  844.22   65.79
   1   9  -9  865.01   56.29
   1   9  -9  838.32   56.99
  -1  -9   9  855.91   66.19
  -1  -9   9  865.21   65.99
  -1  -9   9  966.40   56.29
  -1  -9   9  889.81   56.29
   1   8  -9 1572.04  102.59
   1   8  -9 1673.23  112.09
   1   8  -9 1744.63  102.19
   1   8  -9 1645.24  104.09
  -1  -8   9 1613.24  115.59
  -1  -8   9 1670.23  102.89
   1   7  -9  136.09   12.00
   1   7  -9  107.09   14.60
   1   7  -9  127.79   14.50
   1   7  -9  102.49   13.30
   1   7  -9   98.69   18.80
  -1  -7   9   85.89   21.90
  -1  -7   9  161.98   28.00
  -1  -7   9  149.69   15.30
   1   6  -9  121.89   21.30
   1   6  -9  167.38   17.50
   1   6  -9  164.18   15.60
   1   6  -9  179.38   14.80
   1   6  -9  150.88   17.90
  -1  -6   9  166.28   15.70
  -1  -6   9  147.39   28.60
  -1  -6   9  197.98   32.30
   1   5  -9 2980.80  172.08
   1   5  -9 2637.34  169.88
   1   5  -9 2764.62  170.08
   1   5  -9 3098.09  169.48
   1   5  -9 2955.20  179.38
  -1  -5   9 2687.33  166.48
  -1  -5   9 2777.62  170.28
  -1  -5   9 2592.64  186.18
  -1  -5   9 2403.06  184.28
   1   4  -9 1647.44  101.99
   1   4  -9 1667.73  110.69
   1   4  -9 1662.93  103.99
   1   4  -9 1566.44  102.19
   1   4  -9 1833.92  101.59
  -1  -4   9 1590.84  102.09
  -1  -4   9 1591.24  100.09
  -1  -4   9 1573.74   97.99
  -1  -4   9 1549.05  118.19
  -1  -4   9 1609.64   97.89
  -1  -4   9 1424.96  116.19
   1   3  -9  177.98   20.30
   1   3  -9  198.18   17.60
   1   3  -9  188.78   18.00
   1   3  -9  212.38   23.70
   1   3  -9  205.88   28.10
  -1  -3   9  231.58   17.20
  -1  -3   9  170.28   31.80
  -1  -3   9  228.78   17.90
  -1  -3   9  205.78   16.80
  -1  -3   9  214.58   15.60
  -1  -3   9  176.78   32.70
  -1  -3   9  202.68   18.70
   1   2  -9 3181.88  180.88
   1   2  -9 2955.70  178.28
   1   2  -9 2946.81  186.88
   1   2  -9 3033.30  177.48
   1   2  -9 3135.19  197.18
   1   2  -9 2982.60  177.78
   1   2  -9 3217.68  177.08
   1   2  -9 2833.72  195.38
  -1  -2   9 2647.64  192.98
  -1  -2   9 2758.12  175.68
  -1  -2   9 2661.93  177.08
  -1  -2   9 2720.43  182.78
  -1  -2   9 2766.72  174.68
  -1  -2   9 2958.10  196.28
  -1  -2   9 2723.13  176.38
   1   1  -9 2981.20  173.48
   1   1  -9 3165.28  182.18
   1   1  -9 2994.50  190.18
   1   1  -9 2856.71  169.88
   1   1  -9 3022.90  170.88
   1   1  -9 2904.01  171.08
   1   1  -9 3185.58  192.18
  -1  -1   9 2588.84  169.78
  -1  -1   9 2614.04  170.38
  -1  -1   9 2598.24  168.78
  -1  -1   9 2465.65  185.48
  -1  -1   9 2398.36  175.18
  -1  -1   9 2741.53  188.48
  -1  -1   9 2567.34  167.78
   1   0  -9   -2.70    6.90
   1   0  -9    9.10   13.40
   1   0  -9   -0.90    3.50
   1   0  -9    3.90    4.10
   1   0  -9   -0.20    1.30
   1   0  -9    5.30   11.00
  -1   0   9   -2.30    5.80
  -1   0   9    1.80    3.90
  -1   0   9   -2.10    4.50
  -1   0   9   -2.50    2.30
  -1   0   9   -1.50    2.90
  -1   0   9    6.50   10.60
  -1   0   9   -6.80    7.70
   1  -1  -9 3016.80  180.98
   1  -1  -9 2933.01  191.48
   1  -1  -9 2909.41  169.88
   1  -1  -9 3040.70  170.48
   1  -1  -9 3033.50  191.08
   1  -1  -9 2842.32  169.18
  -1   1   9 2851.91  189.58
  -1   1   9 2598.64  167.88
  -1   1   9 2556.74  169.28
  -1   1   9 2478.05  170.98
  -1   1   9 2455.65  176.98
  -1   1   9 2621.64  168.58
   1  -2  -9 2859.61  173.68
   1  -2  -9 3085.89  185.68
   1  -2  -9 2869.71  196.08
   1  -2  -9 2933.61  173.88
   1  -2  -9 2976.10  194.78
  -1   2   9 2735.33  176.58
  -1   2   9 2647.44  191.48
  -1   2   9 2678.33  172.58
  -1   2   9 2888.71  184.48
  -1   2   9 2910.41  174.08
  -1   2   9 2686.53  174.18
  -1   2   9 2790.52  193.48
   1  -3  -9  220.08   40.00
   1  -3  -9  172.78   17.70
   1  -3  -9  231.58   39.50
   1  -3  -9  143.99   25.10
   1  -3  -9  191.38   17.70
  -1   3   9  268.17   41.10
  -1   3   9  199.88   23.90
  -1   3   9  274.07   42.40
  -1   3   9  211.88   19.20
  -1   3   9  169.18   27.70
  -1   3   9  239.78   18.80
  -1   3   9  207.68   18.80
   1  -4  -9 1640.74  127.59
   1  -4  -9 1651.73  104.89
   1  -4  -9 1788.32  127.19
   1  -4  -9 1686.43  114.09
  -1   4   9 1656.93  133.29
  -1   4   9 1648.64  106.19
  -1   4   9 1568.04  108.09
  -1   4   9 1687.03  104.79
  -1   4   9 1580.54  115.79
  -1   4   9 1718.83  105.79
   1  -5  -9 2726.43  188.98
   1  -5  -9 2786.02  175.18
   1  -5  -9 2781.22  164.78
   1  -5  -9 2739.73  191.68
  -1   5   9 2616.94  166.48
  -1   5   9 2653.63  170.68
  -1   5   9 2626.44  178.88
  -1   5   9 2793.72  168.68
  -1   5   9 2695.53  167.68
   1  -6  -9  158.28   35.00
   1  -6  -9  121.39   20.90
   1  -6  -9  159.78   35.50
  -1   6   9  176.28   19.40
  -1   6   9  168.38   20.00
  -1   6   9  195.18   20.80
  -1   6   9  183.28   29.00
  -1   6   9  183.38   21.30
  -1   6   9  172.88   22.90
   1  -7  -9  137.69   24.00
   1  -7  -9   99.69   28.20
   1  -7  -9  100.59   30.50
   1  -7  -9   83.09   16.70
  -1   7   9  125.99   19.70
  -1   7   9  149.49   27.30
  -1   7   9  117.79   15.40
  -1   7   9  163.18   18.70
  -1   7   9  148.79   18.70
  -1   7   9  139.19   17.80
   1  -8  -9 1451.05  111.19
   1  -8  -9 1544.65  126.19
   1  -8  -9 1581.04  103.39
   1  -8  -9 1506.65  123.59
  -1   8   9 1651.63  104.49
  -1   8   9 1537.95  102.39
  -1   8   9 1685.73  104.99
  -1   8   9 1659.43  117.29
  -1   8   9 1657.83  107.39
  -1   8   9 1752.72  105.19
   1  -9  -9  787.22   76.99
   1  -9  -9  868.31   81.89
   1  -9  -9  770.42   67.89
  -1   9   9  943.81   73.89
  -1   9   9  852.41   62.79
  -1   9   9  895.31   60.49
  -1   9   9  838.72   58.29
   1 -10  -9    2.40   13.20
   1 -10  -9    1.50   13.80
   1 -10  -9    3.40    7.80
  -1  10   9    7.60   11.70
  -1  10   9   22.10    7.90
  -1  10   9   18.90   10.00
   1 -11  -9  308.47   46.10
   1 -11  -9  324.27   44.40
   1 -11  -9  343.97   50.09
  -1  11   9  323.67   28.50
  -1  11   9  320.17   36.60
  -1  11   9  427.76   50.99
   1 -12  -9  425.06   52.99
   1 -12  -9  529.85   59.99
   1 -12  -9  451.15   56.59
  -1  12   9  504.95   44.00
  -1  12   9  501.85   38.40
   1 -13  -9   15.50   16.50
   1 -13  -9   27.90   15.50
   1 -13  -9   29.10   14.50
  -1  13   9   32.80    9.80
  -1  13   9   44.80   15.50
   1 -14  -9  236.98   42.20
  -1  14   9  266.37   28.70
  -1  14   9  207.38   31.70
   1 -15  -9  434.16   58.89
  -1  15   9  400.66   36.00
  -1  15   9  430.06   47.90
   1 -16  -9   96.49   30.10
  -1  16   9   87.39   17.40
  -1  16   9  105.59   26.60
   1 -17  -9  132.19   33.90
  -1  17   9  100.99   20.00
   1 -18  -9  282.97   52.79
   1  13  -8   25.20    6.20
   1  12  -8  112.19   11.90
   1  11  -8  123.69   20.40
   1  11  -8  123.09   11.20
   1  10  -8    8.40    3.60
   1  10  -8    1.60    7.30
   1   9  -8   20.20    4.50
   1   9  -8    8.50    4.10
   1   9  -8   15.90    9.30
   1   9  -8   15.60    5.40
  -1  -9   8   32.50   10.70
  -1  -9   8   19.50    4.10
  -1  -9   8   39.70   10.60
  -1  -9   8   24.60    4.70
   1   8  -8   88.09   11.20
   1   8  -8  108.79    9.00
   1   8  -8  116.49   18.30
   1   8  -8   89.99   10.00
  -1  -8   8   65.49    9.40
  -1  -8   8   61.79   16.10
  -1  -8   8   62.39   16.80
   1   7  -8   71.59   10.50
   1   7  -8   98.79   11.40
   1   7  -8   73.69    8.90
   1   7  -8   76.89    9.70
   1   7  -8   76.19   15.00
  -1  -7   8   75.09   18.90
  -1  -7   8   80.59   10.40
  -1  -7   8   92.39   20.90
   1   6  -8  278.77   22.20
   1   6  -8  290.87   28.20
   1   6  -8  313.57   22.40
   1   6  -8  273.87   20.60
   1   6  -8  265.07   21.20
  -1  -6   8  268.07   21.90
  -1  -6   8  312.97   39.60
  -1  -6   8  291.07   38.10
   1   5  -8  489.35   42.70
   1   5  -8  531.65   37.00
   1   5  -8  573.24   37.50
   1   5  -8  607.74   36.40
   1   5  -8  587.64   38.30
  -1  -5   8  526.85   37.30
  -1  -5   8  482.65   49.30
  -1  -5   8  541.35   50.99
  -1  -5   8  486.15   33.10
   1   4  -8  668.83   44.60
   1   4  -8  676.83   43.60
   1   4  -8  659.83   51.29
   1   4  -8  612.64   44.30
   1   4  -8  633.64   45.50
  -1  -4   8  664.73   40.20
  -1  -4   8  671.63   45.00
  -1  -4   8  669.43   58.49
  -1  -4   8  659.33   42.70
  -1  -4   8  654.13   40.10
  -1  -4   8  682.63   59.19
   1   3  -8  787.72   51.89
   1   3  -8  782.02   49.99
   1   3  -8  817.62   50.79
   1   3  -8  788.52   49.20
   1   3  -8  720.23   56.49
   1   3  -8  750.82   50.29
  -1  -3   8  651.73   52.89
  -1  -3   8  711.13   47.30
  -1  -3   8  721.53   48.30
  -1  -3   8  764.82   46.70
  -1  -3   8  638.34   62.39
  -1  -3   8  657.63   62.09
  -1  -3   8  713.83   47.70
  -1  -3   8  821.72   50.79
   1   2  -8  458.65   52.09
   1   2  -8  467.85   30.10
   1   2  -8  446.86   31.00
   1   2  -8  494.55   45.70
   1   2  -8  395.06   32.10
   1   2  -8  402.36   30.10
   1   2  -8  395.66   36.90
   1   2  -8  425.06   31.10
  -1  -2   8  272.57   41.60
  -1  -2   8  385.36   47.70
  -1  -2   8  430.56   35.50
  -1  -2   8  398.96   30.40
  -1  -2   8  406.46   28.20
  -1  -2   8  407.06   29.20
  -1  -2   8  391.86   29.60
   1   1  -8  653.23   42.50
   1   1  -8  701.73   42.30
   1   1  -8  687.63   58.79
   1   1  -8  595.24   42.70
   1   1  -8  742.03   59.69
   1   1  -8  607.94   49.90
   1   1  -8  577.34   42.10
   1   1  -8  636.24   45.00
  -1  -1   8  674.23   58.59
  -1  -1   8  572.74   42.80
  -1  -1   8  612.04   42.70
  -1  -1   8  595.74   40.80
  -1  -1   8  563.44   55.29
  -1  -1   8  525.55   46.60
  -1  -1   8  585.94   41.50
   1   0  -8    3.80    4.40
   1   0  -8   -2.60    4.20
   1   0  -8  -16.90    8.00
   1   0  -8    2.50    3.60
   1   0  -8    1.80   10.00
   1   0  -8    2.10    3.50
   1   0  -8    0.50    1.70
   1   0  -8    3.00    7.40
  -1   0   8   -6.10    3.90
  -1   0   8   -2.10    2.30
  -1   0   8    3.90   11.10
  -1   0   8   -3.10    2.00
  -1   0   8    3.30    3.30
  -1   0   8   -9.20    8.70
  -1   0   8    1.80    6.90
   1  -1  -8  654.13   58.09
   1  -1  -8  698.43   51.79
   1  -1  -8  595.94   41.60
   1  -1  -8  634.24   42.50
   1  -1  -8  595.94   43.80
   1  -1  -8  624.64   42.50
   1  -1  -8  667.03   59.29
  -1   1   8  520.25   53.99
  -1   1   8  516.85   48.00
  -1   1   8  725.63   60.09
  -1   1   8  590.74   44.20
  -1   1   8  576.34   40.90
  -1   1   8  607.54   42.40
  -1   1   8  588.04   41.60
   1  -2  -8  415.26   52.29
   1  -2  -8  429.56   32.40
   1  -2  -8  414.76   30.30
   1  -2  -8  386.16   37.60
   1  -2  -8  424.26   50.39
   1  -2  -8  454.85   31.00
  -1   2   8  402.76   30.30
  -1   2   8  388.76   32.80
  -1   2   8  359.56   47.30
  -1   2   8  382.46   29.50
  -1   2   8  444.06   53.19
  -1   2   8  444.36   31.80
  -1   2   8  403.46   31.00
  -1   2   8  386.16   38.10
   1  -3  -8  777.92   60.39
   1  -3  -8  864.21   51.99
   1  -3  -8  831.92   55.89
   1  -3  -8  732.73   69.29
   1  -3  -8  855.51   70.29
   1  -3  -8  733.43   51.79
  -1   3   8  791.62   61.99
  -1   3   8  729.53   51.99
  -1   3   8  822.32   69.89
  -1   3   8  814.02   53.59
  -1   3   8  724.93   52.59
  -1   3   8  795.12   69.19
  -1   3   8  796.62   51.99
  -1   3   8  697.63   54.19
   1  -4  -8  669.73   45.10
   1  -4  -8  608.54   51.89
   1  -4  -8  691.63   64.69
   1  -4  -8  605.54   60.79
  -1   4   8  622.54   46.10
  -1   4   8  641.54   48.10
  -1   4   8  664.23   45.20
  -1   4   8  715.83   56.29
  -1   4   8  711.63   46.90
  -1   4   8  690.33   46.10
   1  -5  -8  534.95   33.80
   1  -5  -8  593.34   34.10
   1  -5  -8  595.04   35.30
   1  -5  -8  596.24   56.39
   1  -5  -8  560.64   44.40
   1  -5  -8  422.96   58.89
  -1   5   8  482.75   37.30
  -1   5   8  508.85   40.80
  -1   5   8  516.05   38.40
  -1   5   8  528.25   38.90
  -1   5   8  444.36   45.90
  -1   5   8  505.75   39.00
   1  -6  -8  248.58   28.50
   1  -6  -8  247.08   31.30
   1  -6  -8  301.07   45.00
   1  -6  -8  304.57   44.60
  -1   6   8  284.77   26.30
  -1   6   8  286.07   24.30
  -1   6   8  288.47   24.10
  -1   6   8  256.97   34.00
  -1   6   8  269.77   22.60
  -1   6   8  288.87   23.70
   1  -7  -8   85.79   17.90
   1  -7  -8   63.29   24.20
   1  -7  -8   84.99   14.40
   1  -7  -8   84.39   25.50
  -1   7   8   78.99   14.60
  -1   7   8   69.19   11.70
  -1   7   8   80.09   13.40
  -1   7   8  101.39   14.30
  -1   7   8   92.39   21.30
  -1   7   8   85.99   12.10
   1  -8  -8   89.79   24.70
   1  -8  -8   98.79   10.70
   1  -8  -8   97.89   20.30
   1  -8  -8   65.59   23.50
  -1   8   8   94.59   12.70
  -1   8   8   67.99   14.10
  -1   8   8   74.19   12.70
  -1   8   8   47.10   10.80
  -1   8   8   70.29   19.00
  -1   8   8   90.29   13.50
   1  -9  -8    9.40   14.10
   1  -9  -8   28.20   19.40
   1  -9  -8   13.10   11.50
  -1   9   8   31.60    8.30
  -1   9   8   35.20   15.90
  -1   9   8   12.10    7.90
  -1   9   8   28.20   10.40
  -1   9   8   16.60    7.50
   1 -10  -8   18.10   11.50
   1 -10  -8    0.60   14.40
   1 -10  -8   28.40   17.30
  -1  10   8    0.20   10.90
  -1  10   8    8.10    8.70
  -1  10   8    1.00    6.00
  -1  10   8    5.40    6.00
   1 -11  -8  128.09   26.40
   1 -11  -8  113.89   25.50
   1 -11  -8  119.89   28.70
  -1  11   8  115.39   19.40
  -1  11   8   85.99   13.80
  -1  11   8   98.79   23.00
   1 -12  -8   77.59   22.00
   1 -12  -8  103.19   24.60
   1 -12  -8   83.59   21.80
  -1  12   8  179.48   19.60
  -1  12   8  143.19   22.10
   1 -13  -8   22.30   11.20
   1 -13  -8   29.80   11.80
   1 -13  -8   18.60   15.60
  -1  13   8   10.10   10.50
  -1  13   8   27.20    9.10
   1 -14  -8   18.30   15.20
  -1  14   8   17.30   12.30
  -1  14   8   20.10    8.40
   1 -15  -8   56.59   22.30
  -1  15   8   19.00    8.70
  -1  15   8   40.20   15.00
   1 -16  -8   -5.10   14.10
  -1  16   8    7.80    7.90
   1 -17  -8   80.89   29.70
  -1  17   8   77.39   16.70
   1 -18  -8   57.29   28.00
   1  12  -7  625.54   39.30
   1  11  -7  743.23   55.69
   1  11  -7  739.13   45.30
   1  10  -7  107.79    8.30
   1  10  -7  124.49    8.40
   1  10  -7  123.29   18.70
   1   9  -7  828.02   49.90
   1   9  -7  812.52   59.49
   1   9  -7  840.62   49.80
  -1  -9   7  817.42   52.79
  -1  -9   7  792.62   52.69
   1   8  -7 1275.27   81.89
   1   8  -7 1175.18   72.39
   1   8  -7 1218.98   72.29
  -1  -8   7 1103.19   81.69
  -1  -8   7 1269.57   74.09
  -1  -8   7 1098.99   81.49
   1   7  -7  229.98   26.80
   1   7  -7  289.67   20.00
   1   7  -7  269.77   18.60
   1   7  -7  247.78   19.90
   1   7  -7  275.47   18.40
  -1  -7   7  289.67   20.60
  -1  -7   7  262.57   32.10
   1   6  -7 1327.47   77.59
   1   6  -7 1306.47   77.99
   1   6  -7 1320.07   79.29
   1   6  -7 1302.27   79.09
   1   6  -7 1284.97   85.29
  -1  -6   7 1178.28   90.59
  -1  -6   7 1159.38   79.09
  -1  -6   7 1178.38   90.69
   1   5  -7 2217.08  140.19
   1   5  -7 2227.98  134.29
   1   5  -7 2117.39  133.19
   1   5  -7 2311.27  132.89
   1   5  -7 2202.48  134.99
   1   5  -7 2254.97  134.09
  -1  -5   7 2057.69  146.59
  -1  -5   7 2181.18  134.39
  -1  -5   7 2162.08  147.19
   1   4  -7  689.03   44.80
   1   4  -7  715.43   46.60
   1   4  -7  629.84   50.69
   1   4  -7  705.43   45.90
   1   4  -7  668.83   46.30
   1   4  -7  691.93   45.80
  -1  -4   7  718.03   46.40
  -1  -4   7  720.53   43.80
  -1  -4   7  740.53   59.79
  -1  -4   7  687.63   58.09
   1   3  -7  188.78   24.20
   1   3  -7  218.58   18.40
   1   3  -7  212.78   17.20
   1   3  -7  217.68   18.60
   1   3  -7  215.58   18.00
   1   3  -7  205.48   18.90
  -1  -3   7  284.67   19.70
  -1  -3   7  247.98   15.10
  -1  -3   7  218.28   16.40
  -1  -3   7  197.78   30.60
  -1  -3   7  237.88   15.00
  -1  -3   7  213.48   15.70
  -1  -3   7  237.98   17.10
  -1  -3   7  241.08   33.40
   1   2  -7 2241.98  142.39
   1   2  -7 2307.97  142.99
   1   2  -7 2335.97  156.78
   1   2  -7 2378.06  156.78
   1   2  -7 2256.27  142.99
   1   2  -7 2264.17  148.99
   1   2  -7 2416.26  141.99
   1   2  -7 2329.17  144.39
  -1  -2   7 2220.48  156.18
  -1  -2   7 2571.34  141.79
  -1  -2   7 2368.66  140.79
  -1  -2   7 2379.06  142.09
  -1  -2   7 2284.37  147.19
  -1  -2   7 2362.36  143.09
  -1  -2   7 2093.29  154.58
  -1  -2   7 2407.96  141.79
   1   1  -7 1002.10   75.29
   1   1  -7  999.80   61.09
   1   1  -7  942.71   60.29
   1   1  -7  952.10   67.49
   1   1  -7  994.80   61.39
   1   1  -7  986.50   60.09
   1   1  -7 1001.00   74.79
   1   1  -7  971.90   62.69
  -1  -1   7  862.01   72.69
  -1  -1   7  835.52   72.49
  -1  -1   7  910.91   59.09
  -1  -1   7  905.91   60.59
  -1  -1   7  826.72   64.59
  -1  -1   7  914.81   59.79
  -1  -1   7  950.50   60.39
  -1  -1   7  883.51   60.89
   1   0  -7   -0.30    1.00
   1   0  -7   -1.50    1.90
   1   0  -7   -1.00    3.60
   1   0  -7    1.60    6.10
   1   0  -7  -10.50    8.00
   1   0  -7    3.10    3.30
   1   0  -7    1.70    2.40
   1   0  -7    7.70    9.80
  -1   0   7    3.50    2.90
  -1   0   7   18.40   11.40
  -1   0   7   -1.50    5.10
  -1   0   7    3.40    4.50
  -1   0   7    0.70    3.10
  -1   0   7   -0.40    8.30
  -1   0   7    2.70    2.60
  -1   0   7    0.30    2.30
   1  -1  -7  965.00   68.89
   1  -1  -7  903.01   74.69
   1  -1  -7 1001.90   60.99
   1  -1  -7  952.30   61.59
   1  -1  -7  965.50   63.19
   1  -1  -7  977.90   61.69
   1  -1  -7 1040.30   61.49
   1  -1  -7  962.10   76.59
  -1   1   7  852.11   67.19
  -1   1   7  905.21   60.29
  -1   1   7  982.90   76.29
  -1   1   7  885.71   61.39
  -1   1   7 1008.20   75.99
  -1   1   7  901.91   60.89
  -1   1   7  977.20   62.09
  -1   1   7  867.51   62.79
   1  -2  -7 2262.27  140.79
   1  -2  -7 2261.37  142.29
   1  -2  -7 2303.57  140.89
   1  -2  -7 2276.37  156.48
   1  -2  -7 2232.58  157.28
   1  -2  -7 2174.58  148.19
  -1   2   7 2408.26  157.18
  -1   2   7 2260.27  149.19
  -1   2   7 2288.47  143.49
  -1   2   7 2265.97  140.49
  -1   2   7 2249.87  141.59
  -1   2   7 2361.86  141.19
  -1   2   7 2576.44  142.59
  -1   2   7 2313.17  157.08
   1  -3  -7  207.48   26.70
   1  -3  -7  180.68   32.80
   1  -3  -7  223.68   18.00
   1  -3  -7  249.28   19.90
   1  -3  -7  218.18   18.60
   1  -3  -7  199.48   32.70
  -1   3   7  238.78   18.80
  -1   3   7  249.08   20.10
  -1   3   7  214.28   20.80
  -1   3   7  321.47   40.60
  -1   3   7  239.78   19.30
  -1   3   7  252.67   20.00
  -1   3   7  288.37   38.50
  -1   3   7  192.78   26.90
   1  -4  -7  725.53   44.90
   1  -4  -7  684.43   63.59
   1  -4  -7  724.43   46.00
   1  -4  -7  622.24   60.19
   1  -4  -7  738.83   53.59
  -1   4   7  626.04   48.70
  -1   4   7  673.63   47.80
  -1   4   7  701.23   46.70
  -1   4   7  709.33   47.80
  -1   4   7  737.23   56.09
  -1   4   7  740.63   47.70
   1  -5  -7 2214.58  149.99
   1  -5  -7 2019.10  149.99
   1  -5  -7 2127.69  137.09
  -1   5   7 2122.59  131.79
  -1   5   7 2156.08  132.79
  -1   5   7 2126.69  133.29
  -1   5   7 2173.18  141.99
  -1   5   7 2145.09  134.59
  -1   5   7 2232.78  133.09
   1  -6  -7 1128.99   83.49
   1  -6  -7 1209.88   93.69
   1  -6  -7 1106.09   93.59
   1  -6  -7 1298.87   80.49
  -1   6   7 1206.58   79.09
  -1   6   7 1224.88   77.59
  -1   6   7 1131.59   75.89
  -1   6   7 1106.29   85.29
  -1   6   7 1237.18   77.99
  -1   6   7 1265.27   77.39
   1  -7  -7  253.77   39.20
   1  -7  -7  284.87   23.60
   1  -7  -7  227.58   31.60
   1  -7  -7  261.07   41.10
  -1   7   7  283.07   22.80
  -1   7   7  296.47   24.20
  -1   7   7  287.47   24.30
  -1   7   7  244.58   33.40
  -1   7   7  379.06   25.30
  -1   7   7  303.87   26.00
   1  -8  -7 1110.69   84.09
   1  -8  -7 1268.57   92.89
   1  -8  -7 1035.20   91.19
  -1   8   7 1157.08   75.89
  -1   8   7 1170.58   75.99
  -1   8   7 1193.68   86.29
  -1   8   7 1154.38   77.29
  -1   8   7 1177.98   74.29
  -1   8   7 1146.89   74.99
   1  -9  -7  705.33   71.89
   1  -9  -7  727.73   65.79
   1  -9  -7  775.62   71.19
  -1   9   7  895.71   60.39
  -1   9   7  865.91   56.79
  -1   9   7  963.00   70.59
  -1   9   7  960.90   58.49
  -1   9   7  850.91   58.39
   1 -10  -7  100.69   24.70
   1 -10  -7  110.09   24.50
   1 -10  -7   98.09   22.60
  -1  10   7   88.09   15.70
  -1  10   7  122.09   23.20
  -1  10   7   93.39   13.10
  -1  10   7  102.89   14.80
   1 -11  -7  832.22   67.39
   1 -11  -7  742.13   63.49
   1 -11  -7  723.13   64.69
  -1  11   7  721.53   64.49
  -1  11   7  752.12   55.79
  -1  11   7  803.82   52.59
   1 -12  -7  612.04   49.99
   1 -12  -7  563.04   49.90
   1 -12  -7  572.94   55.69
  -1  12   7  610.14   47.20
  -1  12   7  614.74   43.20
   1 -13  -7   -3.90   10.70
  -1  13   7   51.89   10.70
  -1  13   7   42.40   13.40
   1 -14  -7  186.88   35.80
  -1  14   7  134.09   18.20
  -1  14   7  144.99   23.60
   1 -15  -7  329.87   48.50
  -1  15   7  243.88   26.80
  -1  15   7  239.88   32.00
   1 -16  -7   89.39   28.50
  -1  16   7   48.00   12.80
   1 -17  -7   22.60   22.40
   1 -18  -7  265.87   51.39
  -1  -8   6  212.68   14.90
  -1  -8   6  214.48   14.60
  -1  -8   6  208.28   20.60
  -1  -8   6  208.88   20.70
   1   7  -6   31.60    5.00
  -1  -7   6   17.40    4.50
  -1  -7   6   30.50   10.80
  -1  -7   6   24.90   10.60
   1   6  -6  112.69    7.80
   1   6  -6  103.59    9.50
   1   6  -6  110.69   11.90
   1   6  -6   98.29    7.70
   1   6  -6   86.99   14.30
  -1  -6   6  123.69   10.60
  -1  -6   6  148.29   21.70
   1   5  -6   42.00    9.40
   1   5  -6   39.30    6.00
   1   5  -6   41.60    5.00
   1   5  -6   39.50    5.20
   1   5  -6   37.70    5.70
   1   5  -6   38.10    6.90
  -1  -5   6   52.59    7.30
  -1  -5   6   48.00   13.90
  -1  -5   6   46.90   14.10
   1   4  -6  574.34   43.60
   1   4  -6  596.24   38.40
   1   4  -6  572.74   38.80
   1   4  -6  604.44   38.00
   1   4  -6  575.54   39.60
   1   4  -6  620.34   39.30
  -1  -4   6  578.24   49.80
  -1  -4   6  576.04   49.80
  -1  -4   6  615.14   36.50
  -1  -4   6  600.34   39.50
   1   3  -6   68.59    8.80
   1   3  -6   77.19    8.20
   1   3  -6   73.49   12.80
   1   3  -6   95.99   10.90
   1   3  -6   65.19    8.20
   1   3  -6   93.39   10.40
  -1  -3   6   63.39    8.80
  -1  -3   6   59.19    6.10
  -1  -3   6   72.19    6.60
  -1  -3   6   70.79   17.50
  -1  -3   6   51.39   14.40
   1   2  -6  169.68   14.40
   1   2  -6  159.88   14.90
   1   2  -6  168.18   13.90
   1   2  -6  170.38   20.80
   1   2  -6  188.28   14.70
   1   2  -6  189.48   26.90
   1   2  -6  166.48   25.90
   1   2  -6  182.88   13.70
  -1  -2   6  172.18   12.90
  -1  -2   6  143.69   13.00
  -1  -2   6  173.58   14.40
  -1  -2   6  160.78   13.00
  -1  -2   6  156.48   12.30
  -1  -2   6  123.79   22.80
  -1  -2   6  157.48   18.90
  -1  -2   6  154.98   24.60
   1   1  -6   32.90    6.50
   1   1  -6   29.20    5.70
   1   1  -6   58.79   15.70
   1   1  -6   34.70   13.60
   1   1  -6   37.60    7.10
   1   1  -6   34.80    7.50
   1   1  -6   23.40    8.80
   1   1  -6   34.70    6.10
  -1  -1   6   36.50    7.10
  -1  -1   6   52.79    7.80
  -1  -1   6   36.60   13.80
  -1  -1   6   42.10   14.10
  -1  -1   6   41.80    6.10
  -1  -1   6   56.49    7.70
  -1  -1   6   50.09    7.00
  -1  -1   6   46.60   10.30
   1   0  -6   -2.90    5.20
   1   0  -6   11.60    9.80
   1   0  -6    2.20    3.20
   1   0  -6    0.10    8.20
   1   0  -6    0.20    2.00
   1   0  -6    2.90    3.00
   1   0  -6    1.50    3.80
   1   0  -6    0.20    0.90
  -1   0   6   -5.30    8.00
  -1   0   6   -3.40    3.20
  -1   0   6    9.50    8.40
  -1   0   6    0.90    5.50
  -1   0   6    2.20    2.50
  -1   0   6   -2.60    2.60
  -1   0   6    1.20    2.30
  -1   0   6    1.80    2.80
   1  -1  -6   34.20    7.70
   1  -1  -6   27.90   13.10
   1  -1  -6   27.40   10.00
   1  -1  -6   31.50    6.00
   1  -1  -6   35.70   13.50
   1  -1  -6   40.90    6.50
   1  -1  -6   33.20    6.90
   1  -1  -6   70.29    9.20
  -1   1   6   37.80   10.60
  -1   1   6   38.40    6.30
  -1   1   6   55.49    9.60
  -1   1   6   53.09    8.30
  -1   1   6   49.50   15.60
  -1   1   6   59.59    8.40
  -1   1   6   51.99   16.20
  -1   1   6   52.29    7.20
   1  -2  -6  194.38   16.10
   1  -2  -6  180.98   15.10
   1  -2  -6  201.18   14.40
   1  -2  -6  180.48   22.70
   1  -2  -6  160.78   14.00
   1  -2  -6  159.68   27.60
   1  -2  -6  139.09   25.00
   1  -2  -6  175.18   14.20
  -1   2   6  163.58   14.60
  -1   2   6  160.88   21.90
  -1   2   6  133.29   13.30
  -1   2   6  242.38   31.70
  -1   2   6  154.38   17.70
  -1   2   6  163.58   14.80
  -1   2   6  193.08   29.20
  -1   2   6  154.48   14.00
   1  -3  -6   89.49   15.00
   1  -3  -6   77.19   20.20
   1  -3  -6   70.69    9.70
   1  -3  -6   92.69    9.20
   1  -3  -6   73.49    8.40
   1  -3  -6   61.59    8.50
   1  -3  -6   71.89   18.50
  -1   3   6   68.99   18.30
  -1   3   6   71.09   10.00
  -1   3   6   65.19   11.00
  -1   3   6   75.79    9.30
  -1   3   6   55.09    8.50
  -1   3   6   70.79   18.60
  -1   3   6   51.99   13.00
  -1   3   6   80.19   10.40
   1  -4  -6  598.74   55.99
   1  -4  -6  626.94   54.89
   1  -4  -6  613.04   38.80
   1  -4  -6  589.94   46.20
   1  -4  -6  588.64   39.60
  -1   4   6  659.23   42.40
  -1   4   6  661.03   42.40
  -1   4   6  651.23   49.60
  -1   4   6  676.73   44.10
  -1   4   6  636.14   42.80
  -1   4   6  620.04   41.40
   1  -5  -6   46.00   16.20
   1  -5  -6   24.10    9.20
   1  -5  -6   27.70   14.40
   1  -5  -6   60.79   11.30
  -1   5   6   70.29    9.30
  -1   5   6   54.69    9.70
  -1   5   6   47.60    8.50
  -1   5   6   54.89   13.50
  -1   5   6   48.80    7.70
  -1   5   6   55.99    8.50
   1  -6  -6   90.79   17.40
   1  -6  -6  103.69   13.90
   1  -6  -6   73.69   20.30
   1  -6  -6  109.79   24.70
  -1   6   6  121.29   14.20
  -1   6   6  145.79   13.10
  -1   6   6  126.29   13.40
  -1   6   6  125.09   20.20
  -1   6   6  108.59   14.40
  -1   6   6  115.99   12.50
   1  -7  -6   23.10   14.20
   1  -7  -6   -1.70    6.10
   1  -7  -6   10.60   13.00
  -1   7   6   31.40    7.50
  -1   7   6   31.50    6.50
  -1   7   6   27.60    5.90
  -1   7   6   13.10    5.10
  -1   7   6   11.20    6.90
  -1   7   6   12.20    9.20
   1  -8  -6  168.58   30.60
   1  -8  -6  131.99   24.30
   1  -8  -6  208.48   32.10
  -1   8   6  233.78   19.80
  -1   8   6  198.68   27.50
  -1   8   6  193.58   18.00
  -1   8   6  209.58   16.90
  -1   8   6  204.88   18.40
   1  -9  -6   53.29   16.60
   1  -9  -6   94.29   22.50
   1  -9  -6   76.39   20.90
  -1   9   6  108.79   12.40
  -1   9   6  115.69   21.90
  -1   9   6  116.79   14.20
  -1   9   6   90.69   13.90
   1 -10  -6   23.70   13.30
   1 -10  -6   22.20   14.90
   1 -10  -6   11.50   11.20
  -1  10   6    9.20    5.70
  -1  10   6   24.30    6.40
  -1  10   6   34.30    9.70
  -1  10   6   16.00   12.10
   1 -11  -6  273.67   38.10
   1 -11  -6  243.58   32.50
   1 -11  -6  303.37   34.20
  -1  11   6  318.47   27.00
  -1  11   6  297.57   23.60
  -1  11   6  343.07   40.50
   1 -12  -6   40.90    7.90
   1 -12  -6   24.30   16.20
   1 -12  -6   47.00    8.90
  -1  12   6   51.49   12.60
  -1  12   6   49.40   19.00
  -1  12   6   39.90    8.60
   1 -13  -6   44.90   19.30
  -1  13   6   58.29   14.00
  -1  13   6   51.59   10.20
   1 -14  -6   31.40   17.80
  -1  14   6   22.00    7.80
  -1  14   6   19.30   10.50
   1 -15  -6   46.30   20.10
  -1  15   6   40.90   10.30
   1 -16  -6   -3.70   14.10
  -1  16   6   -0.10    6.40
   1 -17  -6   50.09   25.90
   1 -18  -6    5.00   20.40
  -1 -11   5  732.93   60.29
  -1 -10   5   35.80   13.00
  -1  -9   5  627.24   50.19
  -1  -8   5  918.61   65.99
   1   7  -5   41.30    6.10
  -1  -7   5   18.40    7.90
  -1  -7   5   17.50    7.80
  -1  -7   5   21.10    4.00
   1   6  -5  325.07   22.70
   1   6  -5  335.37   21.00
  -1  -6   5  301.37   22.00
  -1  -6   5  320.87   29.50
  -1  -6   5  309.67   29.20
   1   5  -5 2062.29  130.09
   1   5  -5 2122.09  131.59
  -1  -5   5 2188.18  140.69
  -1  -5   5 2326.37  131.59
  -1  -5   5 2197.18  140.39
   1   4  -5 2756.82  164.58
   1   4  -5 2744.43  165.68
   1   4  -5 2856.41  165.48
   1   4  -5 2788.22  170.28
   1   4  -5 2656.33  166.48
   1   4  -5 2840.22  164.48
  -1  -4   5 2683.93  175.68
  -1  -4   5 2799.22  166.48
  -1  -4   5 2768.22  176.28
   1   3  -5    5.70    4.50
   1   3  -5    7.30    2.40
   1   3  -5    5.00    2.80
   1   3  -5    1.80    2.30
   1   3  -5   12.00    3.50
   1   3  -5    5.00    2.40
  -1  -3   5    0.60    6.90
  -1  -3   5   16.60    4.10
  -1  -3   5   14.00    1.70
  -1  -3   5   17.90    9.00
  -1  -3   5   11.90    1.50
   1   2  -5 1437.66   88.49
   1   2  -5 1371.56   89.69
   1   2  -5 1294.87   89.19
   1   2  -5 1339.37   88.99
   1   2  -5 1325.17   88.79
   1   2  -5 1419.16   99.09
   1   2  -5 1462.75   98.89
   1   2  -5 1342.27   92.89
  -1  -2   5 1601.14   88.59
  -1  -2   5 1556.04   88.59
  -1  -2   5 1428.46   99.09
  -1  -2   5 1628.34   88.09
  -1  -2   5 1557.84  100.59
  -1  -2   5 1585.94   89.89
   1   1  -5 2127.89  132.99
   1   1  -5 2025.70  122.29
   1   1  -5 1966.50  126.69
   1   1  -5 2102.99  133.39
   1   1  -5 2040.50  121.99
   1   1  -5 2062.59  123.39
   1   1  -5 2092.39  122.49
   1   1  -5 2138.69  121.59
  -1  -1   5 1910.81  122.19
  -1  -1   5 1833.62  131.29
  -1  -1   5 1863.81  120.79
  -1  -1   5 1960.30  122.19
  -1  -1   5 1935.41  132.29
  -1  -1   5 1994.20  125.79
  -1  -1   5 1971.20  121.49
  -1  -1   5 2129.49  121.99
   1   0  -5   -2.10    8.10
   1   0  -5    1.50    1.90
   1   0  -5   -0.10    2.30
   1   0  -5   -3.90    8.90
   1   0  -5   -0.80    3.60
   1   0  -5    0.80    2.80
   1   0  -5   -2.80    5.40
   1   0  -5    0.30    0.80
  -1   0   5    0.40    2.60
  -1   0   5   -0.70    4.00
  -1   0   5   -1.20    4.40
  -1   0   5   -2.80    7.80
  -1   0   5   -0.60    3.30
  -1   0   5    4.40    2.40
  -1   0   5    0.00    2.30
  -1   0   5   -0.30    1.60
   1  -1  -5 2175.48  123.19
   1  -1  -5 2051.39  123.69
   1  -1  -5 2072.29  123.59
   1  -1  -5 2132.79  129.69
   1  -1  -5 2092.79  124.79
   1  -1  -5 1913.21  133.89
   1  -1  -5 2074.59  135.59
   1  -1  -5 1987.20  123.09
  -1   1   5 2110.39  134.69
  -1   1   5 2020.80  123.89
  -1   1   5 1964.70  123.19
  -1   1   5 1939.71  122.69
  -1   1   5 1929.51  128.69
  -1   1   5 2127.09  135.39
  -1   1   5 1998.30  124.89
  -1   1   5 1953.60  123.59
   1  -2  -5 1419.86   90.99
   1  -2  -5 1424.06   89.89
   1  -2  -5 1307.47   95.09
   1  -2  -5 1325.47   89.89
   1  -2  -5 1370.26  101.89
   1  -2  -5 1456.15   89.79
   1  -2  -5 1444.96  101.59
   1  -2  -5 1431.86   90.79
  -1   2   5 1694.13   91.49
  -1   2   5 1504.05   90.19
  -1   2   5 1518.35   90.59
  -1   2   5 1487.85  102.29
  -1   2   5 1504.95   92.19
  -1   2   5 1523.85   96.99
  -1   2   5 1663.93  103.59
  -1   2   5 1508.35   91.19
   1  -3  -5    6.80    3.30
   1  -3  -5    7.10    2.60
   1  -3  -5   23.40   11.40
   1  -3  -5   -7.60    6.30
   1  -3  -5   -1.60    4.20
  -1   3   5   16.20    7.70
  -1   3   5    8.90    9.10
  -1   3   5   18.20    4.10
  -1   3   5    8.50    8.90
  -1   3   5   11.90    4.80
  -1   3   5   11.90    3.80
  -1   3   5    7.00    3.40
  -1   3   5   11.60    3.40
   1  -4  -5 2738.03  169.68
   1  -4  -5 2688.23  171.28
   1  -4  -5 2691.23  178.18
   1  -4  -5 2691.83  179.68
  -1   4   5 2762.02  166.98
  -1   4   5 2749.82  165.68
  -1   4   5 2740.53  172.88
  -1   4   5 2865.81  166.28
  -1   4   5 2915.51  166.68
  -1   4   5 2648.33  167.08
   1  -5  -5 2017.90  142.19
   1  -5  -5 2157.68  138.39
   1  -5  -5 1937.01  148.49
   1  -5  -5 1994.50  147.99
  -1   5   5 2378.36  136.49
  -1   5   5 2468.15  137.59
  -1   5   5 2277.07  143.69
  -1   5   5 2433.76  137.89
  -1   5   5 2310.17  137.69
  -1   5   5 2288.17  136.09
   1  -6  -5  318.17   29.20
   1  -6  -5  398.66   36.30
   1  -6  -5  245.28   34.70
   1  -6  -5  309.97   21.00
  -1   6   5  299.47   23.10
  -1   6   5  312.77   23.30
  -1   6   5  288.87   22.70
  -1   6   5  298.97   21.50
  -1   6   5  291.27   28.60
   1  -7  -5   57.39   14.10
   1  -7  -5   48.70   15.20
   1  -7  -5   37.30   14.70
  -1   7   5   23.60    6.30
  -1   7   5   28.00    6.60
  -1   7   5   25.10    9.90
  -1   7   5   23.80    4.90
   1  -8  -5  708.83   59.89
   1  -8  -5  735.83   61.99
   1  -8  -5  605.24   60.99
  -1   8   5  771.62   59.29
  -1   8   5  865.01   52.09
  -1   8   5  825.42   52.39
  -1   8   5  826.82   50.19
   1  -9  -5  602.64   50.29
   1  -9  -5  560.64   49.40
   1  -9  -5  586.54   51.39
  -1   9   5  606.64   49.00
  -1   9   5  554.74   38.50
  -1   9   5  602.44   40.80
  -1   9   5  612.34   40.70
   1 -10  -5   37.90   12.70
   1 -10  -5   13.00   10.10
   1 -10  -5   23.60   12.70
  -1  10   5   34.80    7.50
  -1  10   5   27.70    7.80
  -1  10   5   24.30   11.20
  -1  10   5   35.90    6.50
   1 -11  -5  648.94   56.39
   1 -11  -5  571.34   43.30
   1 -11  -5  585.94   43.80
  -1  11   5  644.64   41.30
  -1  11   5  625.54   52.29
  -1  11   5  625.94   43.50
   1 -12  -5  868.91   73.89
  -1  12   5  889.81   60.99
  -1  12   5  887.11   58.29
  -1  12   5  952.90   71.49
   1 -13  -5    6.80   13.20
  -1  13   5   12.90    5.70
  -1  13   5   14.80    8.10
   1 -14  -5  179.48   35.00
  -1  14   5  188.38   23.20
  -1  14   5  178.58   19.40
   1 -15  -5  352.66   50.39
  -1  15   5  334.17   27.40
   1 -16  -5   28.60   20.10
   1 -17  -5   -5.80   16.40
   1 -18  -5  210.48   43.00
  -1 -14   4   45.00   17.90
   1  13  -4    2.30    7.80
  -1 -13   4    6.60   11.40
   1  12  -4  274.47   28.50
  -1 -12   4  218.38   34.10
  -1 -11   4   42.70   15.00
  -1 -10   4  100.89   20.00
  -1  -9   4  220.68   28.30
   1   8  -4  295.67   20.40
  -1  -8   4  280.57   27.70
   1   7  -4    8.20    3.00
  -1  -7   4   12.80    2.30
  -1  -7   4   14.30    5.50
  -1  -7   4   11.40    7.30
  -1  -7   4   15.50    5.70
   1   6  -4  207.88   15.50
  -1  -6   4  225.88   20.60
  -1  -6   4  204.08   14.80
  -1  -6   4  198.98   20.30
  -1  -6   4  224.48   20.70
   1   5  -4  916.71   53.49
   1   5  -4  945.41   55.89
   1   5  -4  895.71   53.39
  -1  -5   4  876.81   61.99
  -1  -5   4  842.22   61.99
  -1  -5   4  846.72   55.29
  -1  -5   4  899.51   59.89
   1   4  -4  304.27   24.60
   1   4  -4  309.07   20.10
   1   4  -4  316.07   21.50
  -1  -4   4  330.47   28.90
  -1  -4   4  307.87   21.30
  -1  -4   4  298.37   28.30
   1   3  -4  409.26   28.60
   1   3  -4  441.06   36.50
   1   3  -4  433.16   30.20
   1   3  -4  454.35   28.00
   1   3  -4  433.86   28.10
   1   3  -4  461.85   27.20
   1   3  -4  430.76   31.50
   1   3  -4  413.66   27.20
  -1  -3   4  441.06   28.80
  -1  -3   4  451.15   36.90
  -1  -3   4  429.36   36.20
   1   2  -4 1542.55   97.59
   1   2  -4 1715.33  106.59
   1   2  -4 1597.54  105.49
   1   2  -4 1608.74   97.09
   1   2  -4 1539.45   97.09
   1   2  -4 1645.84   96.69
   1   2  -4 1547.25  100.49
   1   2  -4 1581.54   97.49
  -1  -2   4 1710.53   95.69
  -1  -2   4 1676.03   97.79
  -1  -2   4 1609.44   95.59
  -1  -2   4 1605.44  105.99
  -1  -2   4 1591.54   96.39
  -1  -2   4 1515.25  104.99
  -1  -2   4 1596.64   96.19
   1   1  -4 3478.95  206.78
   1   1  -4 3427.56  214.68
   1   1  -4 3312.67  206.68
   1   1  -4 3357.26  206.38
   1   1  -4 3429.06  206.08
   1   1  -4 3451.35  210.28
   1   1  -4 3463.35  207.38
   1   1  -4 3543.85  215.38
  -1  -1   4 3476.75  206.78
  -1  -1   4 3744.83  206.58
  -1  -1   4 3448.16  206.78
  -1  -1   4 3425.46  206.18
  -1  -1   4 3345.07  209.48
  -1  -1   4 3426.56  214.98
  -1  -1   4 3592.64  205.78
  -1  -1   4 3500.35  215.48
   1   0  -4    2.80    7.50
   1   0  -4    3.80    2.00
   1   0  -4    0.30    0.70
   1   0  -4   -2.30    1.70
   1   0  -4    4.30    7.50
   1   0  -4   -0.20    2.80
   1   0  -4   -3.60    3.60
   1   0  -4    1.40    2.30
  -1   0   4    0.50    3.10
  -1   0   4    0.00    6.60
  -1   0   4    0.20    2.10
  -1   0   4   -7.70    3.00
  -1   0   4    1.60    2.10
  -1   0   4    0.60    1.60
  -1   0   4   -0.30    1.50
  -1   0   4    1.10    2.20
   1  -1  -4 3378.56  215.98
   1  -1  -4 3474.55  211.88
   1  -1  -4 3340.27  216.48
   1  -1  -4 3487.75  207.28
   1  -1  -4 3279.27  206.78
   1  -1  -4 3558.34  206.88
   1  -1  -4 3525.85  208.18
   1  -1  -4 3410.96  207.38
  -1   1   4 3467.25  206.88
  -1   1   4 3376.46  207.48
  -1   1   4 3521.85  211.98
  -1   1   4 3525.65  207.18
  -1   1   4 3586.44  216.98
  -1   1   4 3564.14  216.48
  -1   1   4 3429.46  208.38
  -1   1   4 3633.44  207.68
   1  -2  -4 1641.44  103.49
   1  -2  -4 1588.14   98.49
   1  -2  -4 1620.14   99.49
   1  -2  -4 1634.94   99.39
   1  -2  -4 1534.65  108.89
   1  -2  -4 1497.45   98.69
   1  -2  -4 1684.23   98.49
   1  -2  -4 1649.33  108.89
  -1   2   4 1682.43  104.49
  -1   2   4 1718.03  109.39
  -1   2   4 1707.83   99.49
  -1   2   4 1630.74   99.19
  -1   2   4 1676.63  109.39
  -1   2   4 1632.24  100.29
  -1   2   4 1635.84   99.69
  -1   2   4 1626.34   98.89
   1  -3  -4  432.26   27.50
   1  -3  -4  377.86   38.00
   1  -3  -4  429.86   32.50
   1  -3  -4  442.96   27.00
   1  -3  -4  387.76   37.40
  -1   3   4  450.35   38.60
  -1   3   4  452.65   28.90
  -1   3   4  442.66   29.80
  -1   3   4  432.76   29.90
  -1   3   4  471.85   29.50
  -1   3   4  450.75   34.30
  -1   3   4  454.05   29.10
  -1   3   4  425.16   38.40
   1  -4  -4  278.67   33.60
   1  -4  -4  312.67   26.50
   1  -4  -4  241.58   31.00
   1  -4  -4  314.17   24.20
  -1   4   4  316.67   22.70
  -1   4   4  329.77   21.40
  -1   4   4  336.47   21.60
  -1   4   4  319.07   27.00
  -1   4   4  314.17   22.20
  -1   4   4  321.37   22.50
   1  -5  -4  965.00   62.99
   1  -5  -4  943.91   66.99
   1  -5  -4  921.91   67.59
   1  -5  -4  902.91   55.49
  -1   5   4  844.72   54.69
  -1   5   4  834.82   56.39
  -1   5   4  904.21   61.39
  -1   5   4  889.81   55.79
   1  -6  -4  183.88   27.40
   1  -6  -4  226.28   28.20
   1  -6  -4  212.58   26.20
  -1   6   4  214.58   23.40
  -1   6   4  201.98   15.50
  -1   6   4  186.28   16.30
  -1   6   4  224.38   16.50
  -1   6   4  217.18   14.60
   1  -7  -4    0.10    7.80
   1  -7  -4    1.00    8.00
   1  -7  -4   -2.50    5.40
  -1   7   4   10.80    2.70
  -1   7   4    8.60    3.80
  -1   7   4   15.60    4.20
  -1   7   4   18.30    8.10
  -1   7   4   13.40    2.90
   1  -8  -4  308.77   34.70
   1  -8  -4  246.48   31.80
   1  -8  -4  260.47   31.40
  -1   8   4  286.17   19.00
  -1   8   4  298.27   20.30
  -1   8   4  257.37   28.90
  -1   8   4  290.47   19.00
  -1   8   4  280.17   21.70
   1  -9  -4  242.48   31.50
   1  -9  -4  178.98   23.20
   1  -9  -4  160.08   23.60
  -1   9   4  175.88   16.40
  -1   9   4  215.38   14.40
  -1   9   4  194.88   15.60
  -1   9   4  174.18   23.80
  -1   9   4  212.98   14.40
   1 -10  -4   84.29   12.90
   1 -10  -4  104.39   13.90
   1 -10  -4  103.49   22.50
  -1  10   4   92.39    8.40
  -1  10   4   87.59   11.20
  -1  10   4   87.39   10.70
  -1  10   4   90.59    8.40
  -1  10   4   73.59   16.10
   1 -11  -4   35.20   15.50
  -1  11   4   53.69    7.50
  -1  11   4   57.39   14.50
  -1  11   4   63.09    9.70
   1 -12  -4  299.27   39.40
  -1  12   4  230.08   30.90
  -1  12   4  242.08   18.80
  -1  12   4  244.48   21.00
   1 -13  -4   -2.10   11.80
  -1  13   4    9.80    7.10
  -1  13   4   11.90    4.90
   1 -14  -4   21.70   16.20
  -1  14   4   54.69    9.30
   1 -15  -4   59.79   20.90
  -1  15   4   66.59   16.70
   1 -16  -4   -6.10   14.50
   1 -17  -4   38.70   21.80
   1 -18  -4  165.48   39.80
  -1 -16   3  120.19   30.50
  -1 -15   3  543.15   63.19
  -1 -14   3  257.77   38.80
   1  13  -3    8.70    8.80
  -1 -13   3    0.20   10.70
   1  12  -3  590.14   46.80
  -1 -12   3  679.93   56.39
   1  11  -3  868.91   54.89
   1  11  -3  723.33   48.50
  -1 -11   3  677.33   59.79
   1  10  -3   96.69   11.10
   1  10  -3   85.89   10.20
  -1 -10   3  102.39   19.50
   1   9  -3  643.14   41.50
   1   9  -3  614.74   41.10
  -1  -9   3  666.63   50.89
   1   8  -3 1461.95   87.79
   1   8  -3 1412.06   86.69
   1   8  -3 1429.26   87.29
  -1  -8   3 1420.26   95.99
   1   7  -3  848.62   52.29
   1   7  -3  865.41   52.59
   1   7  -3  843.32   52.29
  -1  -7   3  800.42   59.19
   1   6  -3 1721.03  100.89
   1   6  -3 1615.44  100.49
   1   6  -3 1703.43  101.39
  -1  -6   3 1551.54  104.49
  -1  -6   3 1716.83  100.59
  -1  -6   3 1677.03  104.49
  -1  -6   3 1799.52  107.99
   1   5  -3 1885.91  112.09
   1   5  -3 1904.91  110.59
   1   5  -3 1823.72  110.49
  -1  -5   3 1851.81  111.69
  -1  -5   3 1882.41  116.69
  -1  -5   3 1836.82  116.89
  -1  -5   3 1859.31  117.19
   1   4  -3  415.46   26.50
   1   4  -3  432.56   29.60
  -1  -4   3  390.86   31.50
  -1  -4   3  394.46   26.20
  -1  -4   3  390.96   31.60
  -1  -4   3  411.06   29.40
   1   3  -3  633.14   40.20
   1   3  -3  692.03   45.60
   1   3  -3  608.34   38.40
   1   3  -3  633.44   37.20
   1   3  -3  630.74   44.60
  -1  -3   3  573.14   44.20
  -1  -3   3  521.55   43.30
  -1  -3   3  584.34   38.20
   1   2  -3 3045.40  172.68
   1   2  -3 2899.31  179.48
   1   2  -3 3119.99  172.08
   1   2  -3 2877.61  172.58
   1   2  -3 2832.82  173.08
   1   2  -3 3145.39  180.08
   1   2  -3 2956.60  172.18
  -1  -2   3 2850.21  171.78
  -1  -2   3 2771.92  179.18
  -1  -2   3 2857.01  171.58
  -1  -2   3 2761.92  172.98
  -1  -2   3 2724.93  178.98
   1   1  -3  927.61   66.59
   1   1  -3  948.91   61.09
   1   1  -3  916.21   66.69
   1   1  -3  918.61   60.89
   1   1  -3  974.60   60.79
   1   1  -3  906.51   60.49
   1   1  -3  889.91   62.89
   1   1  -3  956.70   60.29
  -1  -1   3 1059.69   60.19
  -1  -1   3 1021.80   67.39
  -1  -1   3 1064.69   61.19
  -1  -1   3 1034.60   60.89
  -1  -1   3 1020.70   63.29
  -1  -1   3 1014.30   67.39
  -1  -1   3 1137.79   60.79
  -1  -1   3 1069.49   60.69
   1   0  -3    2.60    1.60
   1   0  -3   -0.10    0.50
   1   0  -3   -3.70    4.40
   1   0  -3    0.50    1.30
   1   0  -3   -0.20    2.30
   1   0  -3   -2.30    4.60
   1   0  -3    3.00    3.40
   1   0  -3    4.10    2.20
  -1   0   3   -0.30    1.70
  -1   0   3   -1.90    1.90
  -1   0   3    0.30    1.30
  -1   0   3   -0.30    1.20
  -1   0   3    2.20    3.30
  -1   0   3    2.00    1.80
  -1   0   3    6.40    5.50
  -1   0   3    0.60    1.80
   1  -1  -3  872.01   67.39
   1  -1  -3  941.91   61.39
   1  -1  -3  925.31   60.89
   1  -1  -3  962.80   61.09
   1  -1  -3  984.60   60.89
   1  -1  -3  982.70   61.89
   1  -1  -3  918.01   67.39
   1  -1  -3  925.01   64.39
  -1   1   3 1102.19   61.69
  -1   1   3 1030.20   61.19
  -1   1   3 1049.00   68.19
  -1   1   3 1075.59   62.39
  -1   1   3 1063.69   65.19
  -1   1   3 1067.59   69.09
  -1   1   3 1048.30   61.19
  -1   1   3 1038.80   61.69
   1  -2  -3 2797.82  180.28
   1  -2  -3 2912.01  172.78
   1  -2  -3 3030.90  172.68
   1  -2  -3 3115.09  172.18
   1  -2  -3 3120.89  176.68
   1  -2  -3 2943.01  181.38
   1  -2  -3 2967.90  173.48
  -1   2   3 2808.82  180.48
  -1   2   3 2945.01  180.78
  -1   2   3 2777.92  173.48
  -1   2   3 2800.32  172.98
  -1   2   3 2979.00  172.98
  -1   2   3 2830.72  172.68
  -1   2   3 2775.62  173.38
  -1   2   3 2714.73  176.48
   1  -3  -3  629.54   46.50
   1  -3  -3  662.23   40.90
   1  -3  -3  716.13   48.50
   1  -3  -3  645.74   42.70
  -1   3   3  597.34   37.80
  -1   3   3  560.94   45.80
  -1   3   3  588.64   38.50
  -1   3   3  588.24   38.50
  -1   3   3  601.14   39.10
  -1   3   3  627.34   42.50
  -1   3   3  594.54   46.10
   1  -4  -3  364.36   34.20
   1  -4  -3  409.76   26.80
   1  -4  -3  419.36   34.60
   1  -4  -3  383.46   31.30
  -1   4   3  389.86   30.20
  -1   4   3  395.06   27.20
  -1   4   3  426.96   25.30
  -1   4   3  430.06   25.90
   1  -5  -3 1753.62  118.39
   1  -5  -3 1854.71  118.29
   1  -5  -3 1885.41  116.89
  -1   5   3 1751.02  113.49
  -1   5   3 1848.32  110.39
   1  -6  -3 1533.55  109.39
   1  -6  -3 1630.94  109.29
   1  -6  -3 1651.03  109.49
  -1   6   3 1786.02  102.19
  -1   6   3 1707.93  105.99
  -1   6   3 1675.13  102.19
   1  -7  -3  903.41   59.39
   1  -7  -3  825.92   60.49
   1  -7  -3  820.02   59.49
  -1   7   3  799.12   56.09
  -1   7   3  816.72   52.09
  -1   7   3  780.42   51.89
   1  -8  -3 1363.46   88.69
   1  -8  -3 1381.86   93.29
   1  -8  -3 1337.67   87.79
  -1   8   3 1288.77   87.39
  -1   8   3 1328.37   82.79
   1  -9  -3  594.04   51.29
   1  -9  -3  580.74   41.80
   1  -9  -3  616.54   42.30
  -1   9   3  665.63   41.10
  -1   9   3  642.44   46.90
   1 -10  -3   82.49   19.60
  -1  10   3   74.99    9.40
  -1  10   3   90.89   16.10
   1 -11  -3  796.82   59.69
  -1  11   3  683.13   51.29
  -1  11   3  637.04   39.60
  -1  11   3  641.74   39.60
   1 -12  -3  666.93   57.99
  -1  12   3  654.13   40.70
  -1  12   3  612.54   39.10
  -1  12   3  543.95   48.80
   1 -13  -3   15.90   12.90
  -1  13   3    6.60    8.90
  -1  13   3    9.80    4.20
   1 -14  -3  234.98   39.00
  -1  14   3  227.68   18.90
   1 -15  -3  503.95   61.89
   1 -16  -3  139.49   33.90
   1 -17  -3  -14.70   15.40
   1 -18  -3  255.17   47.70
   1 -19  -3  154.28   42.20
  -1 -17   2   41.80   21.40
  -1 -16   2   23.30   18.60
  -1 -15   2   77.69   25.00
  -1 -14   2  105.59   26.30
   1  13  -2   -0.70    7.70
  -1 -13   2    9.30   12.10
   1  12  -2   56.29   13.10
  -1 -12   2   35.90   15.40
   1  11  -2   10.10    5.40
   1  11  -2   -0.40    6.20
  -1 -11   2    1.70    8.50
   1  10  -2   11.60    5.80
   1  10  -2    5.30    6.10
  -1 -10   2   13.80    8.80
   1   9  -2   95.99    8.40
   1   9  -2   92.49   12.20
  -1  -9   2   84.39   16.80
   1   8  -2   85.49    7.80
  -1  -8   2  118.39   18.10
   1   7  -2   88.49    7.60
  -1  -7   2   82.59   14.30
   1   6  -2  538.95   33.60
  -1  -6   2  532.35   39.60
  -1  -6   2  510.05   35.60
  -1  -6   2  533.05   32.30
  -1  -6   2  533.95   35.40
   1   5  -2  300.47   21.40
  -1  -5   2  340.77   25.10
  -1  -5   2  348.57   21.30
  -1  -5   2  334.57   25.40
  -1  -5   2  339.17   26.20
   1   4  -2  225.08   14.20
   1   4  -2  215.38   14.30
   1   4  -2  226.28   17.70
  -1  -4   2  182.28   16.70
  -1  -4   2  190.48   17.90
  -1  -4   2  200.58   14.00
  -1  -4   2  190.78   18.00
   1   3  -2  104.59    9.40
   1   3  -2  103.49   13.50
   1   3  -2  105.49    6.60
   1   3  -2   96.69    7.50
   1   3  -2   99.39   13.40
  -1  -3   2   80.29    7.30
  -1  -3   2   86.59   10.00
  -1  -3   2   92.59   12.80
  -1  -3   2   98.49   12.80
   1   2  -2 2926.01  170.88
   1   2  -2 2874.11  169.98
   1   2  -2 3133.29  175.18
   1   2  -2 2963.80  169.18
   1   2  -2 3010.50  175.18
  -1  -2   2 2761.22  174.48
  -1  -2   2 2727.83  170.78
  -1  -2   2 2693.33  169.88
  -1  -2   2 2714.63  174.58
   1   1  -2  810.52   47.20
   1   1  -2  803.12   51.89
   1   1  -2  750.12   48.70
   1   1  -2  760.22   46.80
   1   1  -2  777.92   46.50
   1   1  -2  823.62   46.80
   1   1  -2  786.12   51.79
   1   1  -2  796.42   47.10
  -1  -1   2  735.53   46.70
  -1  -1   2  774.82   46.50
  -1  -1   2  742.33   51.49
  -1  -1   2  719.73   51.29
  -1  -1   2  761.12   47.10
  -1  -1   2  727.43   46.60
   1   0  -2    0.80    1.10
   1   0  -2    0.10    0.70
   1   0  -2   -0.20    1.60
   1   0  -2   -0.30    1.30
   1   0  -2   -0.70    0.40
   1   0  -2   -0.50    0.80
   1   0  -2   -0.60    2.80
   1   0  -2   -0.20    0.30
  -1   0   2   -0.30    0.80
  -1   0   2    0.50    1.00
  -1   0   2   -0.30    0.70
  -1   0   2   -0.80    0.70
  -1   0   2   -0.50    1.00
  -1   0   2    0.00    0.60
  -1   0   2    0.50    1.30
  -1   0   2   -4.20    1.90
   1  -1  -2  786.92   46.90
   1  -1  -2  771.42   49.50
   1  -1  -2  801.82   46.80
   1  -1  -2  752.92   51.99
   1  -1  -2  785.62   52.09
   1  -1  -2  858.41   47.50
  -1   1   2  779.32   46.90
  -1   1   2  722.83   47.00
  -1   1   2  804.82   52.49
  -1   1   2  739.93   47.20
  -1   1   2  745.03   47.50
  -1   1   2  728.43   49.40
  -1   1   2  768.92   47.00
  -1   1   2  743.53   51.69
   1  -2  -2 2949.00  172.68
   1  -2  -2 2901.71  175.28
   1  -2  -2 2885.61  175.58
   1  -2  -2 2997.90  171.58
  -1   2   2 2892.01  175.28
  -1   2   2 2813.32  168.98
  -1   2   2 2795.12  169.58
  -1   2   2 3008.00  175.78
  -1   2   2 2760.52  172.18
  -1   2   2 2746.43  170.08
  -1   2   2 2795.72  169.38
   1  -3  -2  119.69   13.00
   1  -3  -2   98.99   13.50
   1  -3  -2   83.99    7.20
   1  -3  -2   93.69   13.70
   1  -3  -2   90.69    7.20
  -1   3   2   85.99    7.40
  -1   3   2   75.59    9.60
  -1   3   2   75.99   12.50
  -1   3   2   98.89   12.50
  -1   3   2  111.79   15.00
   1  -4  -2  221.58   19.80
   1  -4  -2  199.78   17.80
   1  -4  -2  218.08   19.30
  -1   4   2  169.98   15.00
  -1   4   2  179.98   13.50
   1  -5  -2  286.87   26.30
   1  -5  -2  303.87   26.40
   1  -5  -2  338.67   27.50
  -1   5   2  332.47   21.60
  -1   5   2  329.17   23.50
   1  -6  -2  498.85   37.50
   1  -6  -2  518.35   38.40
   1  -6  -2  502.05   40.20
  -1   6   2  520.65   35.60
  -1   6   2  539.15   33.30
  -1   6   2  500.65   33.10
   1  -7  -2   84.79   12.00
   1  -7  -2   89.49   12.60
   1  -7  -2   76.19   15.50
  -1   7   2   89.19   12.10
  -1   7   2  106.79    9.10
  -1   7   2  104.49    9.00
   1  -8  -2   82.69   17.70
  -1   8   2  120.49   10.00
  -1   8   2  112.99   14.40
  -1   8   2  110.49   10.10
   1  -9  -2  121.59   21.30
  -1   9   2  102.39    9.20
  -1   9   2   83.19   13.30
   1 -10  -2    8.80   10.00
  -1  10   2    1.40    5.90
  -1  10   2    3.00    2.80
   1 -11  -2   -1.20    6.20
  -1  11   2   -2.00    6.60
   1 -12  -2   85.99   22.30
  -1  12   2   41.70   12.40
   1 -13  -2   -3.80   11.00
  -1  13   2    7.40    9.50
   1 -14  -2  133.19   30.30
   1 -15  -2   36.60   20.80
   1 -16  -2   32.70   19.30
   1 -17  -2   -6.30   15.00
   1 -18  -2   27.40   24.10
   1 -19  -2   13.40   24.00
  -1 -18   1  227.58   44.00
  -1 -17   1   39.60   21.80
  -1 -16   1  359.76   51.79
  -1 -15   1  615.34   69.29
  -1 -14   1  262.57   40.60
   1  13  -1   12.50    8.90
  -1 -13   1    7.50   10.90
   1  12  -1  544.55   43.50
   1  12  -1  570.44   41.60
  -1 -12   1  571.54   51.59
   1  11  -1 1048.00   71.39
  -1 -11   1 1050.79   79.09
   1  10  -1   33.20    8.60
  -1 -10   1   59.09   15.20
   1   9  -1  660.13   44.00
  -1  -9   1  557.34   48.60
   1   8  -1 1806.72  114.99
   1   8  -1 1799.22  111.79
  -1  -8   1 2053.19  122.79
   1   7  -1  608.74   38.40
  -1  -7   1  613.44   45.80
   1   6  -1 1469.75   87.39
  -1  -6   1 1481.75   94.09
  -1  -6   1 1439.76   89.39
  -1  -6   1 1404.56   89.59
   1   5  -1 2815.42  162.48
  -1  -5   1 2669.63  165.28
  -1  -5   1 2723.03  167.58
  -1  -5   1 2631.44  165.48
  -1  -5   1 2783.52  161.78
   1   4  -1 1264.67   75.79
   1   4  -1 1207.48   79.49
  -1  -4   1 1283.87   79.69
  -1  -4   1 1248.28   78.99
  -1  -4   1 1294.37   75.69
  -1  -4   1 1233.58   79.39
   1   3  -1  993.20   62.59
   1   3  -1  992.40   66.39
   1   3  -1 1035.00   65.19
   1   3  -1 1036.50   66.49
  -1  -3   1 1007.30   66.29
  -1  -3   1 1051.19   66.19
  -1  -3   1 1089.39   62.69
  -1  -3   1 1096.59   65.29
   1   2  -1  953.60   54.79
   1   2  -1  932.11   53.49
   1   2  -1  993.00   57.39
   1   2  -1  932.61   53.19
  -1  -2   1  800.82   56.39
  -1  -2   1  849.72   56.59
  -1  -2   1  799.02   54.29
  -1  -2   1  823.32   53.29
   1   0  -1    0.20    0.30
   1   0  -1   -0.10    0.20
   1   0  -1    0.00    0.40
   1   0  -1    0.10    0.20
   1   0  -1    0.10    0.50
   1   0  -1    0.50    1.10
   1   0  -1   -0.20    0.60
   1   0  -1   -0.30    0.20
  -1   0   1   -0.10    0.30
  -1   0   1   -0.20    0.30
  -1   0   1    1.90    1.50
  -1   0   1    0.00    0.20
  -1   0   1    0.10    0.80
  -1   0   1    0.10    0.30
  -1   0   1    0.20    0.40
  -1   0   1    0.00    0.30
   1  -1  -1 3642.84  204.48
   1  -1  -1 3101.99  202.28
  -1   1   1 3615.54  200.98
  -1   1   1 3484.65  201.38
  -1   1   1 3405.66  204.28
  -1   1   1 3666.43  201.38
  -1   1   1 2970.30  200.78
   1  -2  -1  954.00   54.69
   1  -2  -1  912.01   54.99
   1  -2  -1  948.91   55.39
  -1   2   1  785.62   54.09
  -1   2   1  858.41   54.79
  -1   2   1  882.11   55.19
  -1   2   1  818.32   51.69
  -1   2   1  781.92   52.19
   1  -3  -1 1000.50   68.09
   1  -3  -1  998.40   67.29
   1  -3  -1 1001.80   67.59
  -1   3   1 1189.28   68.59
  -1   3   1 1182.88   68.69
  -1   3   1 1081.89   68.69
  -1   3   1 1051.09   64.39
  -1   3   1 1102.39   64.59
   1  -4  -1 1245.28   77.39
   1  -4  -1 1212.38   76.99
   1  -4  -1 1286.17   79.79
  -1   4   1 1214.98   73.89
  -1   4   1 1237.58   74.19
   1  -5  -1 2821.52  168.28
   1  -5  -1 2713.03  163.58
   1  -5  -1 2711.53  163.28
  -1   5   1 2681.73  161.08
  -1   5   1 2750.92  161.18
  -1   5   1 2630.94  161.08
   1  -6  -1 1547.15   97.79
   1  -6  -1 1459.75   89.49
   1  -6  -1 1440.76   89.39
  -1   6   1 1498.05   89.39
  -1   6   1 1543.25   89.59
  -1   6   1 1458.95   89.99
   1  -7  -1  574.14   44.30
  -1   7   1  547.55   35.20
  -1   7   1  566.24   36.70
  -1   7   1  554.14   35.00
   1  -8  -1 1860.01  125.59
  -1   8   1 1946.71  114.79
  -1   8   1 1942.51  114.59
  -1   8   1 1863.51  116.99
   1  -9  -1  608.64   49.99
  -1   9   1  590.24   37.60
  -1   9   1  621.14   37.80
  -1   9   1  589.64   41.50
   1 -10  -1   40.60   13.30
  -1  10   1   34.30    9.00
  -1  10   1   44.40    4.80
   1 -11  -1 1142.69   81.29
  -1  11   1  982.70   69.09
   1 -12  -1  628.74   55.69
  -1  12   1  584.64   44.80
   1 -13  -1   11.60   12.90
  -1  13   1    4.40   10.10
  -1  13   1   -1.30    7.90
   1 -14  -1  230.58   37.90
   1 -15  -1  653.93   64.09
   1 -16  -1  287.17   47.30
   1 -17  -1   36.80   22.60
   1 -18  -1  293.07   50.99
   1 -19  -1  213.68   45.90
  -1 -19   0   -6.10   18.60
  -1 -18   0   12.10   20.90
  -1 -17   0  -17.00   11.10
  -1 -16   0   86.49   26.10
  -1 -15   0  166.08   33.00
  -1 -14   0   85.69   23.60
   1  13   0    0.10    8.80
  -1 -13   0   -2.20   10.10
   1  12   0   35.10   11.60
  -1 -12   0   57.69   17.90
   1  11   0   21.60    9.50
  -1 -11   0   60.69   16.70
   1  10   0   28.20    9.30
  -1 -10   0   37.00   12.30
   1   9   0   51.09   10.30
  -1  -9   0   50.59   13.60
   1   8   0  350.36   28.00
   1   8   0  359.66   24.70
  -1  -8   0  421.26   34.20
   1   7   0  158.88   12.30
   1   7   0  168.28   15.20
  -1  -7   0  155.98   14.30
  -1  -7   0  151.58   20.50
  -1  -7   0  155.38   14.50
   1   6   0   86.59   10.00
   1   6   0   77.09    7.90
  -1  -6   0   69.49   10.90
  -1  -6   0   78.59   13.30
  -1  -6   0   74.69   11.20
   1   5   0   19.40    3.60
  -1  -5   0   14.30    5.60
  -1  -5   0   21.30    6.30
  -1  -5   0   17.50    6.10
   1   4   0   86.29    7.40
   1   4   0  117.09   13.30
  -1  -4   0   90.29   11.90
  -1  -4   0  102.19   12.20
  -1  -4   0   81.29   11.40
  -1  -4   0   90.99    7.10
   1   3   0  115.39   10.50
   1   3   0  111.19    8.10
   1   3   0  121.99   13.30
   1   3   0  102.29   12.60
  -1  -3   0   98.59   12.10
  -1  -3   0   85.39   11.60
  -1  -3   0   96.39    7.80
  -1  -3   0  106.69   10.20
   1   2   0  113.69   11.20
   1   2   0  122.69    9.50
   1   2   0  114.09    8.10
   1   2   0  108.49   10.90
  -1  -2   0  111.89   11.00
  -1  -2   0  115.19    9.40
  -1  -2   0  106.49   10.70
  -1  -2   0  109.49    8.10
   1   0   0   -0.10    0.10
   1   0   0    0.10    0.20
   1   0   0    0.20    0.30
   1   0   0    0.10    0.20
   1   0   0   -0.10    0.20
   1   0   0   -0.10    0.20
   1   0   0   -0.10    0.10
   1   0   0    0.40    0.50
   1   0   0   -0.10    0.10
   1   0   0    0.10    0.60
  -1   0   0    0.10    0.20
  -1   0   0    0.20    0.30
  -1   0   0   -0.10    0.20
  -1   0   0   -0.20    0.20
  -1   0   0   -0.30    0.40
  -1   0   0    0.00    0.20
  -1   0   0   -0.20    0.20
  -1   0   0    0.10    0.20
  -1   0   0    0.00    0.20
  -1   0   0   -0.20    0.40
   1  -1   0    0.10    0.20
   1  -1   0    0.30    0.60
  -1   1   0    2.40    1.10
  -1   1   0   -0.10    0.30
  -1   1   0    0.20    0.80
   1  -2   0  113.29    9.90
  -1   2   0  111.79    8.80
  -1   2   0  120.59    7.50
  -1   2   0  124.09    8.90
  -1   2   0  113.69   10.00
   1  -3   0   91.79   11.40
  -1   3   0  101.59    6.80
  -1   3   0  108.09    8.70
  -1   3   0  110.39   12.40
  -1   3   0  115.59    8.90
   1  -4   0   85.99   12.10
  -1   4   0   97.59    6.60
  -1   4   0   97.59    6.50
   1  -5   0   20.70    6.80
  -1   5   0   13.40    2.10
  -1   5   0   16.90    2.10
   1  -6   0   77.09   13.80
  -1   6   0   82.99    6.30
  -1   6   0   83.39    6.10
   1  -7   0  183.98   22.50
  -1   7   0  150.08   10.40
  -1   7   0  155.98   10.50
   1  -8   0  340.47   32.20
  -1   8   0  361.76   22.40
  -1   8   0  346.07   24.00
  -1   8   0  375.76   22.50
   1  -9   0   66.99   16.20
  -1   9   0   45.90    7.50
   1 -10   0   60.09   16.20
  -1  10   0   28.30    7.60
   1 -11   0   -2.40    7.90
  -1  11   0   24.10    7.70
   1 -12   0   67.49   18.90
  -1  12   0   31.50   10.70
  -1  12   0   33.60    9.40
   1 -13   0    4.00   11.40
  -1  13   0    3.90    6.80
   1 -14   0  115.59   27.80
   1 -15   0  284.97   44.00
   1 -16   0  110.99   29.40
   1 -17   0    5.50   16.40
   1 -18   0    9.00   19.80
   1 -19   0   -8.70   19.60
  -1 -19  -1  171.58   41.00
  -1 -18  -1  260.47   47.20
  -1 -17  -1   36.80   23.40
  -1 -16  -1  331.37   49.70
  -1 -15  -1  670.83   64.39
  -1 -14  -1  250.07   39.00
   1  13   1    9.70    3.40
   1  13   1   -0.40    9.40
  -1 -13  -1   10.90   13.70
   1  12   1  482.95   43.30
   1  12   1  553.94   32.80
  -1 -12  -1  551.44   50.89
   1  11   1  926.31   67.39
  -1 -11  -1 1015.60   75.29
   1  10   1   35.70   10.50
  -1 -10  -1   64.29   15.80
   1   9   1  600.34   45.70
  -1  -9  -1  689.53   52.09
   1   8   1 1959.80  112.69
   1   8   1 1896.31  114.99
  -1  -8  -1 1723.53  113.09
  -1  -8  -1 1835.42  119.99
  -1  -8  -1 1708.43  112.79
   1   7   1  549.85   36.90
   1   7   1  562.34   40.10
  -1  -7  -1  562.64   41.30
  -1  -7  -1  577.44   41.90
  -1  -7  -1  603.64   44.70
   1   6   1 1542.55   95.79
   1   6   1 1526.55   93.39
  -1  -6  -1 1476.35   98.69
  -1  -6  -1 1560.74   99.79
  -1  -6  -1 1552.34   98.59
   1   5   1 2771.92  163.38
   1   5   1 2722.63  165.18
  -1  -5  -1 2836.12  168.68
  -1  -5  -1 2654.33  168.38
  -1  -5  -1 2652.03  168.68
   1   4   1 1254.67   79.19
   1   4   1 1273.47   77.59
   1   4   1 1265.97   81.69
  -1  -4  -1 1288.47   82.79
  -1  -4  -1 1256.37   82.59
  -1  -4  -1 1322.57   81.69
   1   3   1 1145.39   67.69
   1   3   1 1171.58   69.59
   1   3   1 1033.40   65.89
   1   3   1 1197.48   70.19
   1   3   1 1078.09   64.49
  -1  -3  -1  959.90   66.69
  -1  -3  -1  962.80   68.59
  -1  -3  -1  967.90   68.49
  -1  -3  -1 1042.20   64.09
   1   2   1  839.82   57.39
   1   2   1  822.22   54.69
   1   2   1  865.11   57.19
   1   2   1  829.42   53.39
   1   2   1  825.52   52.09
   1   2   1  841.52   52.09
  -1  -2  -1  963.50   53.49
  -1  -2  -1  887.61   57.49
  -1  -2  -1  906.81   54.39
  -1  -2  -1  972.80   57.79
  -1  -2  -1  957.30   55.39
   1   0   1    0.30    0.30
   1   0   1   -0.10    0.20
   1   0   1    1.60    1.40
   1   0   1    0.20    0.40
   1   0   1   -0.10    0.40
   1   0   1    0.00    0.20
   1   0   1   -0.40    0.50
   1   0   1    0.20    0.40
   1   0   1    0.00    0.20
   1   0   1   -0.20    0.20
  -1   0  -1    0.30    0.50
  -1   0  -1   -0.30    0.30
  -1   0  -1    0.00    0.20
  -1   0  -1   -0.90    0.70
  -1   0  -1   -0.10    0.30
  -1   0  -1   -0.10    0.60
  -1   0  -1   -0.40    0.20
  -1   0  -1   -0.50    0.30
  -1   0  -1   -0.10    0.20
  -1   0  -1   -0.10    0.50
  -1   1  -1 3539.05  212.18
  -1   1  -1 3369.96  213.48
  -1   1  -1 3692.53  211.88
  -1   1  -1 3760.72  212.48
   1  -2   1  814.12   57.49
  -1   2  -1  991.40   56.39
  -1   2  -1  945.21   55.09
  -1   2  -1  934.91   56.49
  -1   2  -1  941.31   56.19
  -1   2  -1  924.61   57.89
   1  -3   1 1056.59   66.29
  -1   3  -1 1035.20   66.29
   1  -4   1 1255.47   80.19
   1  -5   1 2843.12  175.08
   1  -6   1 1567.34  101.69
   1  -7   1  577.24   44.70
   1  -8   1 2104.29  136.89
   1  -9   1  616.44   50.19
   1 -10   1   56.39   15.50
  -1  10  -1   47.60   10.40
  -1  10  -1   48.20    7.50
   1 -11   1  966.80   79.29
  -1  11  -1 1033.10   68.19
  -1  11  -1 1181.48   72.39
   1 -12   1  622.04   55.69
  -1  12  -1  620.34   43.70
  -1  12  -1  620.94   46.10
   1 -13   1   14.30   12.90
  -1  13  -1    6.20    6.90
   1 -14   1  300.97   43.90
   1 -15   1  614.44   69.09
   1 -16   1  318.37   49.60
   1 -17   1    5.60   16.50
   1 -18   1  221.98   45.60
  -1 -19  -2    4.80   18.80
  -1 -18  -2   46.60   24.80
  -1 -17  -2  -14.30   12.80
  -1 -16  -2   64.19   23.20
  -1 -15  -2   89.79   26.20
   1  14   2  117.59   13.30
  -1 -14  -2  132.69   28.60
   1  13   2   -0.20    3.20
  -1 -13  -2    4.70   12.00
   1  12   2   54.59    6.70
   1  12   2   34.60   12.00
  -1 -12  -2   65.19   19.10
   1  11   2   -1.50    2.00
   1  11   2   -0.90    1.70
   1  11   2  -10.60    6.40
  -1 -11  -2   -8.70    7.40
   1  10   2   11.30    4.20
   1  10   2   15.60    8.70
  -1 -10  -2   27.30   12.40
   1   9   2   85.99   14.80
  -1  -9  -2   83.49   13.10
  -1  -9  -2  105.89   19.40
  -1  -9  -2   97.69   13.70
   1   8   2  123.99   16.00
  -1  -8  -2   90.49   17.20
  -1  -8  -2   80.09   15.20
  -1  -8  -2   85.49   14.90
   1   7   2   98.59   14.10
   1   7   2  121.69   12.10
  -1  -7  -2   65.69   14.90
  -1  -7  -2   92.29   15.60
  -1  -7  -2  118.49   18.30
   1   6   2  522.35   35.20
   1   6   2  509.45   38.10
  -1  -6  -2  521.45   41.60
  -1  -6  -2  587.14   41.70
  -1  -6  -2  535.45   42.90
   1   5   2  326.77   24.30
   1   5   2  308.57   21.30
  -1  -5  -2  270.67   26.70
  -1  -5  -2  279.57   27.50
  -1  -5  -2  291.67   25.10
   1   4   2  206.08   17.90
   1   4   2  178.68   15.10
  -1  -4  -2  235.88   22.60
  -1  -4  -2  223.78   21.90
  -1  -4  -2  212.08   14.60
  -1  -4  -2  249.58   19.60
   1   3   2   67.09   12.40
   1   3   2   84.59   10.80
   1   3   2   89.09    6.40
   1   3   2   91.09    7.70
   1   3   2   83.29    6.30
   1   3   2   79.29   13.50
  -1  -3  -2   77.49    9.40
  -1  -3  -2   85.39   13.70
  -1  -3  -2   88.29   14.10
  -1  -3  -2   87.09   10.90
   1   2   2 2974.10  176.88
   1   2   2 2672.93  170.98
   1   2   2 2806.72  170.28
   1   2   2 2747.63  176.68
   1   2   2 2819.72  170.98
   1   2   2 2913.91  170.48
   1   2   2 2742.53  173.28
  -1  -2  -2 2987.80  173.18
  -1  -2  -2 3140.09  169.88
  -1  -2  -2 2875.41  176.98
  -1  -2  -2 2815.02  176.78
  -1  -2  -2 2956.10  171.08
   1   1   2  725.43   49.50
   1   1   2  757.02   52.09
   1   1   2  768.42   47.70
   1   1   2  779.02   47.20
   1   1   2  728.03   47.30
   1   1   2  753.92   52.29
   1   1   2  770.72   47.00
  -1  -1  -2  808.22   52.79
  -1  -1  -2  773.82   47.30
  -1  -1  -2  749.82   49.30
  -1  -1  -2  804.22   47.00
  -1  -1  -2  823.42   47.70
   1   0   2    0.90    2.80
   1   0   2    0.30    0.60
   1   0   2    0.30    0.60
   1   0   2    1.10    0.70
   1   0   2    0.80    1.20
   1   0   2    0.10    1.00
   1   0   2    1.40    1.00
   1   0   2   -0.40    0.90
   1   0   2   -0.20    0.80
   1   0   2    1.80    1.10
  -1   0  -2    1.00    3.00
  -1   0  -2    1.00    1.10
  -1   0  -2   -0.20    0.20
  -1   0  -2    1.90    1.00
  -1   0  -2    2.50    1.40
  -1   0  -2    0.70    1.90
  -1   0  -2    1.70    1.10
  -1   0  -2    0.30    0.60
  -1   0  -2   -0.70    1.30
   1  -1   2  752.32   45.50
   1  -1   2  719.83   45.40
   1  -1   2  679.63   46.40
   1  -1   2  695.43   49.30
   1  -1   2  674.03   49.20
  -1   1  -2  811.82   45.60
  -1   1  -2  794.22   49.99
  -1   1  -2  787.92   46.70
  -1   1  -2  763.02   45.80
  -1   1  -2  749.53   47.80
  -1   1  -2  782.82   45.90
  -1   1  -2  840.52   50.29
  -1   1  -2  794.22   45.50
  -1   1  -2  769.72   45.70
   1  -2   2 2706.33  171.98
   1  -2   2 2808.62  169.18
   1  -2   2 2787.32  169.18
   1  -2   2 2796.42  169.68
   1  -2   2 2561.34  171.58
  -1   2  -2 2946.11  171.78
  -1   2  -2 3088.89  172.78
  -1   2  -2 2995.30  169.98
  -1   2  -2 2978.30  169.58
  -1   2  -2 2961.20  172.48
   1  -3   2   82.89    5.80
   1  -3   2   87.59    5.80
   1  -3   2   74.09    8.20
   1  -3   2   96.09    8.20
   1  -3   2   71.99    9.80
  -1   3  -2   93.39   10.80
  -1   3  -2   74.39    9.90
  -1   3  -2  101.69    7.50
   1  -4   2  186.68   18.10
  -1   4  -2  223.68   15.80
  -1   4  -2  233.98   14.00
   1  -5   2  321.57   25.30
  -1   5  -2  290.27   21.00
  -1   5  -2  300.07   18.30
   1  -6   2  532.75   41.40
  -1   6  -2  567.94   36.90
   1  -7   2   89.89   15.20
  -1   7  -2   85.99   10.60
   1  -8   2  102.59   17.60
  -1   8  -2   80.39   11.00
   1  -9   2  105.59   18.90
  -1   9  -2   99.89   13.10
   1 -10   2    8.70    7.50
  -1  10  -2    3.80    5.20
   1 -11   2    3.50    9.00
  -1  11  -2    3.90    5.00
  -1  11  -2   13.40    6.10
   1 -12   2   16.70   13.50
  -1  12  -2   66.69   13.20
  -1  12  -2   72.59   11.00
   1 -13   2    9.30   11.90
  -1  13  -2    2.20    6.00
   1 -14   2  111.39   27.40
   1 -15   2   76.79   24.10
   1 -16   2   42.90   22.30
   1 -17   2    8.40   18.10
  -1 -19  -3  136.49   37.00
  -1 -18  -3  255.97   47.80
  -1 -17  -3    8.30   16.40
  -1 -16  -3  163.58   34.20
   1  15   3  474.15   35.30
  -1 -15  -3  521.65   61.09
   1  14   3  242.88   20.20
  -1 -14  -3  210.58   38.00
   1  13   3    9.90    4.80
   1  13   3    2.40    5.90
  -1 -13  -3   15.20   13.50
   1  12   3  650.03   43.30
   1  12   3  608.24   40.90
   1  12   3  624.74   51.89
  -1 -12  -3  620.74   55.59
   1  11   3  631.14   51.09
   1  11   3  619.34   41.10
  -1 -11  -3  746.43   58.09
   1  10   3   91.29   17.30
   1  10   3   85.59    9.10
   1  10   3   94.39    8.30
   1  10   3  107.59   11.90
  -1 -10  -3   92.19   14.30
  -1 -10  -3   70.29   18.80
  -1 -10  -3   79.09   13.80
   1   9   3  597.04   48.30
   1   9   3  655.03   39.90
   1   9   3  624.54   39.60
  -1  -9  -3  613.84   49.70
  -1  -9  -3  679.33   52.59
  -1  -9  -3  643.84   49.40
   1   8   3 1425.46   82.79
   1   8   3 1311.77   90.89
   1   8   3 1358.36   82.59
  -1  -8  -3 1419.86   94.19
  -1  -8  -3 1407.26   94.89
  -1  -8  -3 1292.87   94.79
   1   7   3  812.02   58.09
   1   7   3  840.32   50.59
   1   7   3  804.12   50.49
  -1  -7  -3  842.22   60.89
  -1  -7  -3  893.11   63.09
  -1  -7  -3  831.22   63.29
   1   6   3 1754.22  101.69
   1   6   3 1736.53  108.79
   1   6   3 1720.93  101.79
   1   6   3 1728.33  104.79
  -1  -6  -3 1520.45  113.09
  -1  -6  -3 1686.93  110.69
  -1  -6  -3 1669.03  113.19
   1   5   3 1877.81  119.69
   1   5   3 1958.40  113.89
   1   5   3 1880.31  113.79
   1   5   3 2018.60  116.39
  -1  -5  -3 1875.21  114.29
  -1  -5  -3 1795.52  125.19
  -1  -5  -3 1907.21  124.99
  -1  -5  -3 1872.91  120.89
   1   4   3  430.46   26.60
   1   4   3  397.56   26.30
   1   4   3  434.56   27.50
   1   4   3  419.76   31.60
   1   4   3  423.96   28.10
  -1  -4  -3  434.86   37.00
  -1  -4  -3  377.26   28.90
  -1  -4  -3  393.76   31.30
  -1  -4  -3  404.36   35.80
   1   3   3  603.94   42.50
   1   3   3  593.94   39.10
   1   3   3  633.04   47.50
   1   3   3  583.84   38.10
   1   3   3  581.54   46.40
   1   3   3  593.64   39.10
  -1  -3  -3  641.94   47.50
  -1  -3  -3  665.13   42.00
  -1  -3  -3  649.93   48.00
   1   2   3 2714.53  176.28
   1   2   3 2846.42  173.48
   1   2   3 2747.33  172.98
   1   2   3 3027.10  181.08
   1   2   3 2950.60  180.98
   1   2   3 2716.33  172.28
  -1  -2  -3 3080.69  172.18
  -1  -2  -3 2885.51  180.88
  -1  -2  -3 2906.61  181.18
  -1  -2  -3 2982.90  172.88
  -1  -2  -3 3047.90  176.38
   1   1   3 1023.70   62.59
   1   1   3 1135.79   63.19
   1   1   3 1113.09   63.29
   1   1   3 1080.29   70.29
   1   1   3 1069.39   70.19
   1   1   3 1033.30   66.49
   1   1   3 1046.80   62.99
   1   1   3 1097.99   63.99
  -1  -1  -3  961.80   69.49
  -1  -1  -3  989.10   69.79
  -1  -1  -3  947.71   65.79
  -1  -1  -3  981.50   62.39
  -1  -1  -3 1019.60   63.49
  -1  -1  -3  957.10   62.59
  -1  -1  -3  940.51   62.89
   1   0   3    0.80    1.10
   1   0   3    1.60    1.40
   1   0   3    3.40    1.80
   1   0   3    0.80    1.70
   1   0   3   -0.20    3.70
   1   0   3    0.10    1.60
   1   0   3    0.50    2.40
   1   0   3    2.80    5.30
   1   0   3    1.80    2.40
  -1   0  -3   -5.00    2.80
  -1   0  -3   -0.50    5.00
  -1   0  -3    1.50    1.30
  -1   0  -3    2.50    5.50
  -1   0  -3   -1.10    1.90
  -1   0  -3   -0.20    1.50
  -1   0  -3   -0.30    0.40
   1  -1   3 1029.30   62.09
   1  -1   3 1056.49   60.99
   1  -1   3 1041.00   61.29
   1  -1   3 1124.69   60.99
   1  -1   3 1041.60   61.59
   1  -1   3 1069.09   67.49
   1  -1   3 1048.60   67.39
   1  -1   3 1055.79   61.29
  -1   1  -3  952.20   61.69
  -1   1  -3  976.20   64.19
  -1   1  -3  976.80   60.99
  -1   1  -3  955.60   61.19
  -1   1  -3 1024.90   67.39
  -1   1  -3  955.70   61.49
  -1   1  -3  937.41   61.99
  -1   1  -3  935.41   60.99
  -1   1  -3  985.40   66.99
   1  -2   3 2735.23  170.68
   1  -2   3 2828.72  170.98
   1  -2   3 2711.53  171.08
   1  -2   3 2691.93  175.38
   1  -2   3 2741.43  175.58
  -1   2  -3 2947.61  169.88
  -1   2  -3 3161.58  176.68
  -1   2  -3 2909.91  169.98
  -1   2  -3 2993.80  172.78
  -1   2  -3 3018.70  176.48
  -1   2  -3 2910.01  170.98
   1  -3   3  596.44   37.40
   1  -3   3  554.04   41.30
   1  -3   3  597.04   41.50
   1  -3   3  567.74   37.60
   1  -3   3  565.54   37.30
  -1   3  -3  645.44   37.70
  -1   3  -3  651.73   38.00
  -1   3  -3  655.13   38.60
  -1   3  -3  638.34   41.10
   1  -4   3  393.26   28.10
   1  -4   3  411.16   30.40
   1  -4   3  419.46   25.40
   1  -4   3  405.56   25.30
   1  -4   3  404.76   28.60
  -1   4  -3  414.96   25.80
  -1   4  -3  420.06   26.50
   1  -5   3 1930.21  117.59
  -1   5  -3 1838.32  111.99
  -1   5  -3 1832.92  110.59
   1  -6   3 1668.23  107.79
  -1   6  -3 1675.13  101.59
   1  -7   3  780.52   57.79
  -1   7  -3  825.32   51.59
   1  -8   3 1454.35   96.19
  -1   8  -3 1388.06   87.59
   1  -9   3  677.83   53.29
  -1   9  -3  660.53   44.40
   1 -10   3  105.49   21.00
  -1  10  -3   91.09   11.70
   1 -11   3  701.93   59.49
  -1  11  -3  721.53   48.10
   1 -12   3  613.94   56.29
  -1  12  -3  644.44   43.90
   1 -13   3   -2.10   10.40
  -1  13  -3    4.40    6.40
   1 -14   3  225.58   38.70
   1 -15   3  554.44   64.79
   1 -16   3  173.88   36.60
  -1 -19  -4   16.20   22.30
  -1 -18  -4  147.99   37.00
  -1 -17  -4   44.70   23.30
  -1 -16  -4  -18.60   12.20
   1  15   4   58.39   11.00
  -1 -15  -4   23.90   20.00
   1  14   4   47.90    9.60
   1  14   4   40.20   12.00
  -1 -14  -4   40.30   19.20
   1  13   4    4.80    4.60
   1  13   4   12.90    8.20
  -1 -13  -4   13.40   14.20
   1  12   4  220.18   31.70
   1  12   4  249.68   19.90
   1  12   4  241.38   22.60
  -1 -12  -4  281.37   38.70
   1  11   4   45.90    9.60
   1  11   4   42.00    7.40
   1  11   4   40.10   14.60
  -1 -11  -4   53.79   11.50
  -1 -11  -4   43.40   10.60
  -1 -11  -4   53.29   17.50
   1  10   4   88.59   10.10
   1  10   4   69.29   11.00
   1  10   4   94.29   10.80
   1  10   4  111.79   19.30
   1  10   4  107.59   13.10
  -1 -10  -4   75.09   17.10
  -1 -10  -4   91.59   18.40
  -1 -10  -4  126.09   22.50
   1   9   4  170.28   16.80
   1   9   4  244.38   16.50
   1   9   4  210.78   17.50
   1   9   4  182.18   25.00
   1   9   4  200.68   15.50
  -1  -9  -4  222.78   30.00
  -1  -9  -4  159.68   26.80
  -1  -9  -4  173.68   26.00
   1   8   4  266.47   21.20
   1   8   4  305.77   20.30
   1   8   4  246.08   29.30
   1   8   4  274.57   19.70
  -1  -8  -4  300.67   34.10
  -1  -8  -4  252.37   34.40
  -1  -8  -4  252.97   33.00
   1   7   4   11.30    3.50
   1   7   4   12.60    7.80
   1   7   4    8.80    3.20
   1   7   4    9.80    4.50
  -1  -7  -4    4.70    6.90
  -1  -7  -4   -5.00    8.60
  -1  -7  -4    8.10   10.00
   1   6   4  202.38   17.40
   1   6   4  200.78   23.70
   1   6   4  211.78   15.60
   1   6   4  219.18   17.10
   1   6   4  229.38   16.00
  -1  -6  -4  229.38   30.50
  -1  -6  -4  243.08   26.80
  -1  -6  -4  142.99   26.00
   1   5   4  831.72   54.99
   1   5   4  905.91   56.69
   1   5   4  807.32   60.89
   1   5   4  865.41   56.79
  -1  -5  -4  975.20   58.39
  -1  -5  -4  935.81   69.09
  -1  -5  -4  866.11   61.49
  -1  -5  -4  970.80   68.69
   1   4   4  316.47   22.60
   1   4   4  339.67   24.20
   1   4   4  342.47   24.00
   1   4   4  304.87   27.90
  -1  -4  -4  357.56   26.80
  -1  -4  -4  368.26   35.00
  -1  -4  -4  328.67   32.90
   1   3   4  429.36   28.60
   1   3   4  418.36   33.70
   1   3   4  427.16   30.00
   1   3   4  440.96   29.80
   1   3   4  460.15   38.80
   1   3   4  437.86   38.80
   1   3   4  404.26   29.20
  -1  -3  -4  459.75   27.70
  -1  -3  -4  416.96   28.20
  -1  -3  -4  454.55   39.30
  -1  -3  -4  439.76   32.80
  -1  -3  -4  438.56   39.40
   1   2   4 1609.34  100.39
   1   2   4 1608.14  101.39
   1   2   4 1738.03  110.69
   1   2   4 1777.82  111.19
   1   2   4 1754.62  100.69
   1   2   4 1612.74  105.19
   1   2   4 1644.94  100.79
   1   2   4 1673.03  100.09
  -1  -2  -4 1714.63  110.89
  -1  -2  -4 1619.94   99.59
  -1  -2  -4 1558.04  104.19
  -1  -2  -4 1631.84  100.69
  -1  -2  -4 1554.74  109.99
   1   1   4 3568.64  213.68
   1   1   4 3528.25  205.38
   1   1   4 3691.23  204.48
   1   1   4 3262.27  203.88
   1   1   4 3615.84  213.78
   1   1   4 3380.66  203.68
   1   1   4 3324.47  208.68
  -1  -1  -4 3354.96  204.18
  -1  -1  -4 3363.96  203.98
  -1  -1  -4 3364.56  208.48
  -1  -1  -4 3224.68  212.78
  -1  -1  -4 3238.38  212.58
  -1  -1  -4 3461.15  204.98
  -1  -1  -4 3460.65  203.58
   1   0   4    2.70    4.70
   1   0   4    3.90    2.30
   1   0   4    0.80    6.50
   1   0   4    1.50    2.20
   1   0   4   -4.70    4.80
   1   0   4    0.60    1.60
   1   0   4   -1.60    1.10
   1   0   4    0.20    2.80
  -1   0  -4   -1.00    4.30
  -1   0  -4    0.10    0.90
  -1   0  -4   -0.20    1.50
  -1   0  -4   -0.20    2.00
  -1   0  -4   -4.70    1.90
  -1   0  -4   -0.10    6.60
  -1   0  -4   -1.40    6.30
   1  -1   4 3482.25  208.28
   1  -1   4 3527.65  207.38
   1  -1   4 3729.33  207.88
   1  -1   4 3563.54  208.18
   1  -1   4 3380.56  215.78
   1  -1   4 3477.25  211.58
   1  -1   4 3347.77  208.18
   1  -1   4 3588.44  216.58
   1  -1   4 3566.04  207.68
   1  -1   4 3596.34  209.28
  -1   1  -4 3504.35  208.18
  -1   1  -4 3483.95  209.08
  -1   1  -4 3210.88  207.68
  -1   1  -4 3257.77  211.78
  -1   1  -4 3636.24  207.78
  -1   1  -4 3414.46  208.68
  -1   1  -4 3671.03  216.88
  -1   1  -4 3460.95  215.88
   1  -2   4 1673.03   97.99
   1  -2   4 1653.23   96.49
   1  -2   4 1541.25  103.09
   1  -2   4 1592.14   96.19
   1  -2   4 1586.54   94.39
   1  -2   4 1580.44  103.19
   1  -2   4 1541.45   94.29
  -1   2  -4 1570.84   95.89
  -1   2  -4 1474.55   95.39
  -1   2  -4 1613.44   95.89
  -1   2  -4 1610.64   95.39
  -1   2  -4 1642.14   95.19
  -1   2  -4 1610.24  103.69
  -1   2  -4 1654.13  103.59
  -1   2  -4 1488.35   98.99
   1  -3   4  460.05   27.60
   1  -3   4  406.46   33.40
   1  -3   4  451.65   34.20
   1  -3   4  461.65   27.80
  -1   3  -4  422.66   27.40
  -1   3  -4  411.56   27.50
  -1   3  -4  417.86   29.80
  -1   3  -4  409.46   26.40
  -1   3  -4  407.46   30.40
  -1   3  -4  411.56   26.40
   1  -4   4  331.57   20.80
   1  -4   4  350.96   26.60
   1  -4   4  320.37   26.10
   1  -4   4  313.57   20.70
  -1   4  -4  319.77   22.70
  -1   4  -4  290.27   20.60
  -1   4  -4  304.57   20.90
   1  -5   4  831.72   57.79
   1  -5   4  913.31   53.89
   1  -5   4  847.42   53.69
   1  -5   4  830.42   57.29
  -1   5  -4  934.41   54.49
  -1   5  -4  943.81   54.59
   1  -6   4  195.68   23.40
  -1   6  -4  222.18   15.50
   1  -7   4    3.10    5.80
  -1   7  -4   11.30    3.40
   1  -8   4  249.68   29.90
  -1   8  -4  277.87   19.50
   1  -9   4  225.08   28.20
  -1   9  -4  193.08   15.40
   1 -10   4   81.09   18.50
  -1  10  -4   95.19   10.40
   1 -11   4   27.90   13.90
  -1  11  -4   42.40    6.50
   1 -12   4  306.67   41.10
   1 -13   4    8.40   12.60
  -1  13  -4   16.40    7.50
   1 -14   4   52.69   20.60
  -1 -18  -5  278.67   49.70
  -1 -17  -5    1.10   17.80
   1  16   5   48.20   12.10
  -1 -16  -5   37.20   21.10
   1  15   5  294.27   26.20
  -1 -15  -5  336.87   49.10
   1  14   5  205.08   25.50
   1  14   5  161.98   19.40
  -1 -14  -5  198.88   37.00
   1  13   5    3.10    5.10
   1  13   5    7.70    8.10
  -1 -13  -5   14.00   13.40
   1  12   5  810.42   54.09
   1  12   5  869.31   67.99
   1  12   5  857.81   57.99
  -1 -12  -5  920.41   70.89
  -1 -12  -5  802.22   54.49
  -1 -12  -5  743.13   53.79
   1  11   5  649.93   53.89
   1  11   5  654.83   44.90
   1  11   5  550.34   40.90
  -1 -11  -5  595.44   49.60
  -1 -11  -5  670.83   56.09
  -1 -11  -5  575.64   50.39
   1  10   5   28.10    7.60
   1  10   5   30.00   13.80
   1  10   5   28.40    8.90
   1  10   5   32.70    6.90
  -1 -10  -5   17.30   10.50
  -1 -10  -5   17.10   12.70
  -1 -10  -5   22.30   12.80
   1   9   5  573.14   38.40
   1   9   5  602.94   41.10
   1   9   5  627.24   49.20
   1   9   5  570.84   40.10
  -1  -9  -5  538.75   48.50
  -1  -9  -5  521.75   50.79
  -1  -9  -5  529.85   52.39
   1   8   5  824.02   50.89
   1   8   5  812.62   53.09
   1   8   5  802.82   60.59
  -1  -8  -5  746.33   60.09
  -1  -8  -5  683.93   63.19
  -1  -8  -5  774.82   66.79
   1   7   5   37.00   11.90
   1   7   5   10.50    5.50
   1   7   5   24.00    5.20
  -1  -7  -5   33.50   14.00
  -1  -7  -5   42.50   16.40
  -1  -7  -5   62.29   13.80
   1   6   5  277.17   22.00
   1   6   5  292.57   29.50
   1   6   5  310.47   24.30
  -1  -6  -5  303.07   38.20
  -1  -6  -5  345.47   24.90
  -1  -6  -5  336.97   41.60
  -1  -6  -5  353.26   30.20
   1   5   5 2341.77  135.59
   1   5   5 2269.67  133.39
   1   5   5 2240.78  134.89
   1   5   5 2304.27  141.59
  -1  -5  -5 2121.09  136.89
  -1  -5  -5 2020.70  147.49
  -1  -5  -5 2136.59  139.79
  -1  -5  -5 2046.90  146.39
   1   4   5 2683.23  169.38
   1   4   5 2835.62  175.78
   1   4   5 2978.70  169.18
   1   4   5 2775.82  168.38
   1   4   5 2881.91  170.18
   1   4   5 2904.41  170.58
  -1  -4  -5 2801.92  165.78
  -1  -4  -5 2504.05  181.48
  -1  -4  -5 2845.02  165.78
  -1  -4  -5 2660.93  181.58
  -1  -4  -5 2773.62  173.08
   1   3   5   12.80    3.80
   1   3   5   14.80    4.20
   1   3   5   17.50   10.80
   1   3   5    6.50    9.00
   1   3   5   15.80    4.10
   1   3   5   11.60    5.00
   1   3   5    3.50    6.40
   1   3   5   10.30    3.60
  -1  -3  -5    2.60    2.10
  -1  -3  -5    1.40    8.50
  -1  -3  -5    4.40    5.60
  -1  -3  -5    3.70    3.40
  -1  -3  -5    5.10    9.80
   1   2   5 1533.95   91.29
   1   2   5 1527.05   93.19
   1   2   5 1561.24   97.99
   1   2   5 1749.22  105.39
   1   2   5 1544.95   91.99
   1   2   5 1721.03   92.49
   1   2   5 1584.64  103.79
  -1  -2  -5 1402.06  102.59
  -1  -2  -5 1337.77   95.99
  -1  -2  -5 1408.86   90.79
  -1  -2  -5 1439.16   90.69
  -1  -2  -5 1364.76  102.69
  -1  -2  -5 1406.86   91.99
  -1  -2  -5 1331.97   91.39
   1   1   5 2143.79  124.59
   1   1   5 1977.20  125.49
   1   1   5 2209.98  136.39
   1   1   5 2066.89  124.09
   1   1   5 1954.10  123.49
   1   1   5 2152.98  135.79
   1   1   5 1940.11  129.49
  -1  -1  -5 2090.29  125.49
  -1  -1  -5 2017.70  124.09
  -1  -1  -5 2126.59  123.69
  -1  -1  -5 2064.69  135.29
  -1  -1  -5 1920.01  123.99
  -1  -1  -5 1887.41  134.49
  -1  -1  -5 2103.29  130.19
   1   0   5    4.50    9.20
   1   0   5    0.10    2.30
   1   0   5    1.20    8.70
   1   0   5   -4.30    2.90
   1   0   5   -5.90    4.80
   1   0   5    3.90    3.10
   1   0   5    3.90    2.30
   1   0   5    2.80    2.30
  -1   0  -5  -17.90    6.70
  -1   0  -5   -4.20    5.50
  -1   0  -5    1.60    2.60
  -1   0  -5    2.20    2.00
  -1   0  -5    1.40    1.40
  -1   0  -5    1.90    3.60
  -1   0  -5   -0.40    8.90
   1  -1   5 1970.60  127.79
   1  -1   5 2172.68  123.49
   1  -1   5 1922.41  122.59
   1  -1   5 2009.80  122.99
   1  -1   5 1865.31  132.49
   1  -1   5 1901.31  132.89
   1  -1   5 2047.00  123.89
   1  -1   5 1976.50  123.89
   1  -1   5 1913.51  123.49
  -1   1  -5 2192.18  125.19
  -1   1  -5 2227.38  123.29
  -1   1  -5 2004.00  123.39
  -1   1  -5 2226.88  134.49
  -1   1  -5 2058.59  123.89
  -1   1  -5 1979.20  128.69
  -1   1  -5 2202.58  134.69
   1  -2   5 1604.34   89.39
   1  -2   5 1533.85   90.89
   1  -2   5 1536.45   93.19
   1  -2   5 1557.24   88.09
   1  -2   5 1509.85   99.99
   1  -2   5 1641.54   88.29
   1  -2   5 1550.54   90.69
   1  -2   5 1496.15   88.99
   1  -2   5 1554.54   99.99
   1  -2   5 1492.75   88.49
  -1   2  -5 1326.67   98.59
  -1   2  -5 1350.96   94.19
  -1   2  -5 1386.86   89.89
  -1   2  -5 1347.27   89.59
  -1   2  -5 1409.76   90.69
  -1   2  -5 1345.87   90.29
  -1   2  -5 1405.66   89.39
  -1   2  -5 1410.46   98.89
   1  -3   5   12.20    3.30
   1  -3   5   11.50    3.50
   1  -3   5   19.70    8.60
   1  -3   5   12.00    8.40
  -1   3  -5    4.90    2.60
  -1   3  -5    1.90    2.10
  -1   3  -5    6.80    2.00
  -1   3  -5    5.50    2.20
  -1   3  -5    1.60    1.70
  -1   3  -5    4.50    2.00
  -1   3  -5    1.90    3.90
   1  -4   5 2768.42  161.68
   1  -4   5 2735.53  161.78
   1  -4   5 2719.73  160.88
   1  -4   5 2499.65  168.78
   1  -4   5 2673.03  169.48
  -1   4  -5 2674.63  160.48
  -1   4  -5 2741.33  164.98
  -1   4  -5 2810.02  161.98
  -1   4  -5 2632.34  160.58
   1  -5   5 2375.86  133.09
   1  -5   5 2310.17  132.89
   1  -5   5 2124.89  139.09
   1  -5   5 2222.98  139.99
  -1   5  -5 2223.88  132.09
  -1   5  -5 2115.59  133.19
  -1   5  -5 2101.69  135.59
   1  -6   5  320.57   20.60
   1  -6   5  292.97   24.60
   1  -6   5  286.57   20.30
  -1   6  -5  344.67   24.30
  -1   6  -5  343.97   20.50
  -1   7  -5   48.80    5.00
  -1   8  -5  773.22   46.90
   1  -9   5  673.73   53.99
   1 -10   5   33.30   13.20
   1 -11   5  670.63   57.29
  -1 -18  -6   15.10   21.80
  -1 -17  -6   19.40   20.30
   1  16   6   11.00    8.10
  -1 -16  -6   -9.50   14.10
   1  15   6   19.90    8.60
   1  15   6   26.10   14.10
  -1 -15  -6   27.70   18.40
   1  14   6    7.30   11.20
   1  14   6   11.00    6.70
  -1 -14  -6   13.10   14.50
   1  13   6   45.90   12.80
   1  13   6   43.80    9.90
  -1 -13  -6   30.90   17.00
   1  12   6   26.50    8.10
   1  12   6   48.50   12.30
  -1 -12  -6   42.10   14.20
  -1 -12  -6   33.10   16.30
  -1 -12  -6   46.10   14.60
   1  11   6  302.97   24.30
   1  11   6  366.56   42.10
   1  11   6  288.87   27.50
  -1 -11  -6  310.07   38.00
  -1 -11  -6  262.17   38.30
  -1 -11  -6  287.37   38.40
   1  10   6   19.80    6.50
   1  10   6   12.20   12.30
   1  10   6   18.50    8.80
   1  10   6   26.30    7.20
  -1 -10  -6   15.10   14.50
  -1 -10  -6   40.10   14.90
  -1 -10  -6   39.20   17.70
   1   9   6   68.19   11.90
   1   9   6  122.59   16.60
   1   9   6  112.99   12.90
   1   9   6  115.19   21.50
  -1  -9  -6   84.09   21.80
  -1  -9  -6  105.19   25.80
  -1  -9  -6   70.29   18.20
   1   8   6  183.68   26.40
   1   8   6  194.98   21.10
   1   8   6  203.08   18.10
   1   8   6  189.08   16.20
  -1  -8  -6  121.19   29.00
  -1  -8  -6  209.78   33.90
  -1  -8  -6  164.28   26.00
   1   7   6   15.00    6.10
   1   7   6   19.90    7.60
   1   7   6   25.40    6.00
   1   7   6   13.80   10.20
  -1  -7  -6   30.10   10.90
  -1  -7  -6   39.80   18.30
  -1  -7  -6   24.50    6.60
  -1  -7  -6   39.30   16.30
   1   6   6  144.79   16.50
   1   6   6  108.59   19.80
   1   6   6  125.29   14.50
   1   6   6  106.99   12.00
  -1  -6  -6   92.49   14.60
  -1  -6  -6   88.49   22.90
  -1  -6  -6   91.19   17.20
  -1  -6  -6   69.79   20.70
   1   5   6   51.19    8.20
   1   5   6   59.59   10.20
   1   5   6   45.70    7.60
   1   5   6   60.09    9.60
   1   5   6   31.20   11.50
  -1  -5  -6   39.60   15.90
  -1  -5  -6   52.99   18.20
  -1  -5  -6   40.30   10.10
   1   4   6  674.73   43.00
   1   4   6  615.64   49.20
   1   4   6  620.64   42.20
   1   4   6  659.03   42.40
   1   4   6  663.93   44.10
   1   4   6  635.44   41.40
  -1  -4  -6  580.14   40.20
  -1  -4  -6  667.83   56.49
  -1  -4  -6  621.84   46.90
  -1  -4  -6  600.84   55.99
  -1  -4  -6  568.94   39.20
   1   3   6   45.20   16.00
   1   3   6   72.39   11.60
   1   3   6   95.79   16.80
   1   3   6   55.89    8.80
   1   3   6   70.99    9.80
   1   3   6  105.19   21.90
   1   3   6   57.19    8.40
   1   3   6   71.09    9.80
  -1  -3  -6   89.09    9.30
  -1  -3  -6   77.89   19.20
  -1  -3  -6   86.39   10.80
  -1  -3  -6   74.79   14.30
  -1  -3  -6   63.59   18.90
   1   2   6  155.08   14.20
   1   2   6  181.58   15.10
   1   2   6  158.58   13.80
   1   2   6  136.79   16.90
   1   2   6  160.18   26.90
   1   2   6  173.28   27.50
   1   2   6  148.29   21.30
  -1  -2  -6  184.28   15.90
  -1  -2  -6  160.08   14.40
  -1  -2  -6  169.98   14.30
  -1  -2  -6  191.08   14.20
  -1  -2  -6  164.78   21.80
  -1  -2  -6  201.98   30.70
  -1  -2  -6  138.89   25.50
   1   1   6   43.50    7.10
   1   1   6   44.50   11.40
   1   1   6   44.80    8.60
   1   1   6   47.60    7.00
   1   1   6   29.70   13.40
   1   1   6   57.49   16.30
   1   1   6   40.70    6.60
   1   1   6   59.29    8.60
  -1  -1  -6   33.20    6.50
  -1  -1  -6   31.60   10.00
  -1  -1  -6   19.70   11.80
  -1  -1  -6    7.10    7.90
  -1  -1  -6   24.90    5.50
  -1  -1  -6   34.40    6.10
  -1  -1  -6   46.70    8.50
   1   0   6    1.30    5.90
   1   0   6   -6.10    8.30
   1   0   6    0.50    2.00
   1   0   6   -1.20    1.70
   1   0   6   10.40    9.40
   1   0   6   -4.60    3.00
   1   0   6    1.40    2.60
   1   0   6   -2.70    2.30
  -1   0  -6   -0.40    1.40
  -1   0  -6   -4.60    5.10
  -1   0  -6    0.10    2.60
  -1   0  -6   -1.90    3.60
  -1   0  -6    7.30    9.60
  -1   0  -6    5.00    2.60
  -1   0  -6    1.60    7.90
   1  -1   6   38.20    5.90
   1  -1   6   43.50    6.30
   1  -1   6   45.10   10.60
   1  -1   6   39.30    7.20
   1  -1   6   40.80    6.90
   1  -1   6   45.90    6.90
   1  -1   6   50.39   15.70
   1  -1   6   99.19   19.10
   1  -1   6   64.19    8.20
  -1   1  -6   32.30   12.60
  -1   1  -6   44.20    6.60
  -1   1  -6   54.79    9.20
  -1   1  -6   31.30    6.40
  -1   1  -6   34.60   13.60
  -1   1  -6   40.90   10.50
  -1   1  -6   27.30    5.40
   1  -2   6  148.89   12.60
   1  -2   6  159.88   13.00
   1  -2   6  165.58   14.00
   1  -2   6  175.68   12.50
   1  -2   6  142.59   24.00
   1  -2   6  149.19   14.00
   1  -2   6  201.88   27.40
   1  -2   6  150.38   12.40
  -1   2  -6  172.88   13.70
  -1   2  -6  168.48   14.10
  -1   2  -6  151.58   24.30
  -1   2  -6  190.18   15.50
  -1   2  -6  157.08   24.20
  -1   2  -6  157.08   20.10
  -1   2  -6  196.28   13.60
   1  -3   6   67.89    8.70
   1  -3   6   59.59    7.90
   1  -3   6   59.39    4.40
   1  -3   6   66.49   15.00
   1  -3   6   71.09   10.10
   1  -3   6   60.09   14.90
   1  -3   6   56.89    4.40
  -1   3  -6   72.49    9.10
  -1   3  -6   79.79    8.90
  -1   3  -6   59.69    7.50
  -1   3  -6   83.09    7.10
  -1   3  -6   72.29   12.60
  -1   3  -6   80.59    8.70
   1  -4   6  606.44   47.80
   1  -4   6  610.54   38.40
   1  -4   6  582.74   47.50
   1  -4   6  645.14   37.70
  -1   4  -6  565.54   36.70
  -1   4  -6  570.44   37.20
  -1   4  -6  563.24   37.30
  -1   4  -6  577.24   42.40
  -1   4  -6  582.24   36.50
  -1   4  -6  551.44   37.70
  -1   4  -6  568.74   38.20
   1  -5   6   57.39   13.50
   1  -5   6   70.89    5.40
   1  -5   6   50.59    6.70
   1  -5   6   50.09    6.70
   1  -5   6   35.20   11.00
  -1   5  -6   48.50    9.40
  -1   5  -6   36.80    4.20
  -1   5  -6   40.70    5.50
  -1   5  -6   42.30    5.70
   1  -6   6  130.99    9.80
   1  -6   6  107.29   17.10
   1  -6   6  124.69    9.70
   1  -6   6   99.39   15.80
  -1   6  -6  108.49    8.40
  -1   6  -6   97.79   13.80
  -1   6  -6   92.59    8.30
   1  -7   6   17.30    3.20
   1  -7   6   22.20    3.40
   1  -7   6   13.70    6.60
   1  -7   6   27.30    7.70
  -1   7  -6   22.10    2.60
  -1   7  -6   15.30    6.30
  -1   7  -6   23.80    2.60
  -1   8  -6  182.78   17.90
  -1   9  -6   91.49   13.10
  -1  10  -6   31.30    7.90
  -1  11  -6  309.97   26.30
  -1  12  -6   55.39   11.20
  -1 -18  -7  273.57   50.59
   1  17   7   44.60   12.80
  -1 -17  -7  -10.00   15.00
   1  16   7   60.19   14.30
  -1 -16  -7   96.09   28.50
   1  15   7  259.47   28.40
   1  15   7  293.57   35.20
  -1 -15  -7  219.78   41.20
   1  14   7  150.88   20.50
   1  14   7  174.78   26.60
  -1 -14  -7  187.28   34.40
   1  13   7   45.40   14.50
   1  13   7   44.90   10.50
  -1 -13  -7   31.40   12.30
  -1 -13  -7   35.10   12.60
  -1 -13  -7   17.30   16.00
   1  12   7  581.64   44.20
   1  12   7  641.84   49.30
  -1 -12  -7  623.64   55.29
  -1 -12  -7  669.63   58.99
  -1 -12  -7  592.74   56.19
   1  11   7  815.32   55.99
   1  11   7  848.62   66.79
   1  11   7  744.83   50.79
  -1 -11  -7  695.13   64.09
  -1 -11  -7  604.64   63.79
  -1 -11  -7  664.63   61.79
   1  10   7   92.79   22.40
   1  10   7   99.79   14.20
   1  10   7  119.29   18.40
   1  10   7  120.79   16.40
  -1 -10  -7  115.49   26.20
  -1 -10  -7   88.29   26.10
  -1 -10  -7  127.89   24.80
   1   9   7  863.51   55.79
   1   9   7  766.52   66.59
   1   9   7  859.01   59.39
   1   9   7  906.61   57.79
  -1  -9  -7  761.32   71.39
  -1  -9  -7  693.23   72.19
  -1  -9  -7  820.12   65.99
   1   8   7 1289.67   79.49
   1   8   7 1313.57   78.09
   1   8   7 1252.77   88.89
   1   8   7 1190.58   79.69
   1   8   7 1181.18   77.79
   1   8   7 1164.08   76.19
  -1  -8  -7 1107.09   93.49
  -1  -8  -7 1141.19   85.59
  -1  -8  -7 1094.79   95.89
  -1  -8  -7 1125.99   72.89
   1   7   7  279.97   24.10
   1   7   7  298.97   26.20
   1   7   7  282.17   35.40
   1   7   7  340.97   25.70
   1   7   7  287.37   22.90
   1   7   7  324.77   24.30
  -1  -7  -7  305.37   45.90
  -1  -7  -7  205.08   37.30
  -1  -7  -7  239.98   24.70
  -1  -7  -7  255.37   32.60
   1   6   7 1098.29   76.19
   1   6   7 1192.28   87.19
   1   6   7 1172.48   78.39
   1   6   7 1175.68   77.89
   1   6   7 1338.37   78.39
   1   6   7 1207.08   79.89
  -1  -6  -7 1199.78   84.19
  -1  -6  -7 1256.27   81.89
  -1  -6  -7 1180.98   96.09
  -1  -6  -7 1268.57   95.69
   1   5   7 2243.38  139.69
   1   5   7 2360.06  138.19
   1   5   7 2361.76  147.89
   1   5   7 2125.49  137.69
   1   5   7 1990.30  136.09
   1   5   7 2319.37  138.59
  -1  -5  -7 2097.69  155.38
  -1  -5  -7 2301.67  143.19
  -1  -5  -7 2215.78  132.59
  -1  -5  -7 2052.59  153.38
  -1  -5  -7 2357.26  132.79
   1   4   7  677.83   49.30
   1   4   7  706.23   55.79
   1   4   7  769.92   48.10
   1   4   7  710.43   47.80
   1   4   7  722.03   63.29
   1   4   7  716.13   47.90
   1   4   7  674.73   47.20
   1   4   7  656.43   46.30
  -1  -4  -7  677.23   63.39
  -1  -4  -7  743.93   46.70
  -1  -4  -7  669.43   61.99
  -1  -4  -7  637.34   52.09
   1   3   7  224.18   18.80
   1   3   7  282.47   39.00
   1   3   7  282.67   20.80
   1   3   7  241.38   19.60
   1   3   7  229.08   19.50
   1   3   7  191.48   27.30
   1   3   7  217.68   20.90
   1   3   7  287.87   38.40
  -1  -3  -7  220.18   19.60
  -1  -3  -7  242.88   36.20
  -1  -3  -7  191.08   33.40
  -1  -3  -7  207.38   26.30
   1   2   7 2310.27  142.29
   1   2   7 2356.66  145.19
   1   2   7 2456.45  143.19
   1   2   7 2267.27  142.99
   1   2   7 2417.76  143.59
   1   2   7 2526.55  159.78
   1   2   7 2495.05  159.58
   1   2   7 2189.08  150.28
  -1  -2  -7 2234.48  158.48
  -1  -2  -7 2252.97  142.89
  -1  -2  -7 2320.07  142.49
  -1  -2  -7 2283.57  143.89
  -1  -2  -7 2347.27  150.28
  -1  -2  -7 2225.08  157.38
   1   1   7  910.41   61.89
   1   1   7  929.61   60.59
   1   1   7  717.23   70.19
   1   1   7  982.40   75.19
   1   1   7  856.51   59.89
   1   1   7  865.01   59.49
   1   1   7  913.71   59.49
   1   1   7  865.61   66.89
  -1  -1  -7  946.21   60.29
  -1  -1  -7 1031.10   59.89
  -1  -1  -7  929.41   60.29
  -1  -1  -7  952.50   67.69
  -1  -1  -7 1041.50   62.59
  -1  -1  -7 1052.89   76.09
   1   0   7   -5.00    7.80
   1   0   7    1.20    2.40
   1   0   7    1.50    2.50
   1   0   7    2.80    6.20
   1   0   7    3.70    3.30
   1   0   7   -6.60    7.30
   1   0   7    2.00    3.10
   1   0   7   -0.40    4.20
  -1   0  -7   -2.40    5.70
  -1   0  -7   -0.20    2.10
  -1   0  -7    4.60    9.50
  -1   0  -7   -1.60    3.60
  -1   0  -7   -1.70    1.70
  -1   0  -7    2.10    3.10
  -1   0  -7   -7.70    7.70
   1  -1   7  887.51   72.99
   1  -1   7  891.51   66.39
   1  -1   7  941.71   60.39
   1  -1   7  836.92   61.29
   1  -1   7  901.21   61.39
   1  -1   7  920.71   73.79
   1  -1   7  902.61   59.79
   1  -1   7  944.71   61.39
   1  -1   7  994.60   61.09
  -1   1  -7 1071.69   60.99
  -1   1  -7  979.50   61.79
  -1   1  -7  978.50   68.49
  -1   1  -7 1076.29   76.69
  -1   1  -7  886.61   60.59
  -1   1  -7 1043.70   63.69
  -1   1  -7 1020.00   74.99
   1  -2   7 2255.57  139.29
   1  -2   7 2264.37  140.89
   1  -2   7 2396.16  139.99
   1  -2   7 2162.18  152.78
   1  -2   7 2469.25  139.39
   1  -2   7 2339.27  138.79
   1  -2   7 2243.28  153.88
   1  -2   7 2310.37  141.69
   1  -2   7 2339.37  140.19
  -1   2  -7 2431.36  140.09
  -1   2  -7 2208.28  140.19
  -1   2  -7 2495.95  155.38
  -1   2  -7 2156.68  147.09
  -1   2  -7 2297.27  142.49
  -1   2  -7 2269.47  154.08
  -1   2  -7 2195.38  140.79
   1  -3   7  223.08   20.90
   1  -3   7  247.78   18.80
   1  -3   7  227.48   15.90
   1  -3   7  227.68   18.30
   1  -3   7  230.38   30.90
   1  -3   7  241.18   16.20
   1  -3   7  235.48   32.40
  -1   3  -7  221.58   25.50
  -1   3  -7  238.58   19.50
  -1   3  -7  204.88   17.90
  -1   3  -7  242.78   17.50
  -1   3  -7  222.18   17.90
   1  -4   7  678.43   56.29
   1  -4   7  711.33   45.10
   1  -4   7  709.03   57.39
   1  -4   7  731.63   46.10
  -1   4  -7  610.84   50.19
  -1   4  -7  712.83   45.40
  -1   4  -7  695.03   45.10
  -1   4  -7  667.13   45.90
  -1   4  -7  707.53   44.40
  -1   4  -7  701.83   45.90
   1  -5   7 2118.79  132.49
   1  -5   7 2061.59  142.99
   1  -5   7 2216.08  130.79
   1  -5   7 2147.09  143.69
  -1   5  -7 2219.38  132.09
  -1   5  -7 2053.89  137.69
  -1   5  -7 2268.27  130.89
  -1   5  -7 2219.68  131.19
  -1   5  -7 2126.89  132.59
  -1   5  -7 2257.47  131.99
   1  -6   7 1079.99   85.89
   1  -6   7 1187.68   77.59
   1  -6   7 1202.98   87.59
   1  -6   7 1245.78   77.79
  -1   6  -7 1249.28   77.29
  -1   6  -7 1244.68   77.79
  -1   6  -7 1282.37   75.59
  -1   6  -7 1336.97   75.59
  -1   6  -7 1305.97   83.79
  -1   6  -7 1306.67   76.49
   1  -7   7  279.97   27.00
   1  -7   7  306.97   19.80
   1  -7   7  314.87   19.70
   1  -7   7  289.47   27.90
  -1   7  -7  241.88   18.90
  -1   7  -7  243.78   19.30
  -1   7  -7  256.17   24.70
   1  -8   7 1154.08   66.59
   1  -8   7 1087.59   66.49
   1  -8   7 1142.59   70.99
   1  -8   7 1073.89   70.39
  -1   8  -7 1172.78   75.59
  -1   9  -7  805.72   56.79
  -1  10  -7  112.69   16.10
  -1  11  -7  847.12   59.79
  -1  12  -7  655.83   48.90
  -1 -18  -8   37.00   23.70
   1  17   8   62.49   15.10
  -1 -17  -8   43.50   22.10
   1  16   8   -0.10   12.00
   1  16   8    4.70    8.20
  -1 -16  -8   29.00   17.70
   1  15   8   17.40   10.10
   1  15   8   23.70   14.70
  -1 -15  -8   29.50   18.90
   1  14   8   11.10   12.50
   1  14   8    5.30    7.10
  -1 -14  -8   15.90   15.50
   1  13   8   15.10   12.40
   1  13   8   13.00    7.90
  -1 -13  -8   17.90   13.60
  -1 -13  -8   37.60   19.30
  -1 -13  -8   23.20   14.20
   1  12   8  190.78   25.90
   1  12   8  161.68   19.10
  -1 -12  -8   52.79   19.60
  -1 -12  -8   75.89   22.30
  -1 -12  -8  134.19   29.90
   1  11   8  121.69   16.30
   1  11   8  103.79   19.00
   1  11   8   88.79   23.10
  -1 -11  -8   81.39   25.10
  -1 -11  -8   91.19   25.70
  -1 -11  -8   72.49   20.90
   1  10   8    9.90    6.00
   1  10   8   12.00    7.10
   1  10   8   14.90   12.80
   1  10   8    9.90    9.10
  -1 -10  -8   -2.10   13.00
  -1 -10  -8    5.00   14.80
  -1 -10  -8    4.30   11.70
   1   9   8   10.00    9.20
   1   9   8   22.00    8.50
   1   9   8   20.80   10.20
   1   9   8    3.80   10.70
   1   9   8   32.00    8.10
  -1  -9  -8   21.30   18.90
  -1  -9  -8   26.10   13.20
  -1  -9  -8   22.50   17.40
   1   8   8   73.19   12.50
   1   8   8   67.09   12.70
   1   8   8   81.19   13.80
   1   8   8   69.99   18.80
   1   8   8   65.09   11.20
   1   8   8   56.59   14.20
  -1  -8  -8   86.09   18.60
  -1  -8  -8   96.79   13.30
  -1  -8  -8   69.49   24.30
  -1  -8  -8   85.79   27.10
   1   7   8   79.89   12.90
   1   7   8   61.29   14.00
   1   7   8   61.39   10.70
   1   7   8   51.69   16.70
   1   7   8   81.19   13.10
   1   7   8   76.09   12.80
  -1  -7  -8   38.70   13.60
  -1  -7  -8   54.09   21.90
  -1  -7  -8   71.89   14.30
  -1  -7  -8   61.09   25.20
   1   6   8  293.37   24.80
   1   6   8  340.27   25.50
   1   6   8  266.37   28.90
   1   6   8  288.17   24.50
   1   6   8  264.87   35.10
   1   6   8  266.27   22.80
  -1  -6  -8  216.68   41.20
  -1  -6  -8  272.17   30.60
  -1  -6  -8  265.27   42.60
   1   5   8  451.35   36.70
   1   5   8  511.05   36.40
   1   5   8  473.25   37.10
   1   5   8  483.45   39.40
   1   5   8  519.65   37.70
   1   5   8  511.05   46.70
  -1  -5  -8  514.65   60.19
  -1  -5  -8  577.44   35.10
  -1  -5  -8  481.85   60.69
  -1  -5  -8  547.85   43.70
   1   4   8  687.43   47.00
   1   4   8  691.03   64.59
   1   4   8  683.23   47.90
   1   4   8  704.83   48.10
   1   4   8  758.92   48.80
   1   4   8  685.63   49.99
   1   4   8  770.72   58.59
  -1  -4  -8  646.74   63.89
  -1  -4  -8  656.13   53.69
  -1  -4  -8  560.84   68.89
  -1  -4  -8  660.73   48.90
   1   3   8  836.82   69.49
   1   3   8  717.93   67.09
   1   3   8  785.12   52.79
   1   3   8  707.43   59.79
   1   3   8  698.33   50.69
   1   3   8  769.32   54.49
   1   3   8  677.63   51.49
   1   3   8  765.72   51.89
  -1  -3  -8  861.41   70.99
  -1  -3  -8  821.32   60.49
  -1  -3  -8  827.92   51.19
  -1  -3  -8  775.52   52.19
  -1  -3  -8  863.81   71.89
   1   2   8  342.67   31.30
   1   2   8  347.17   29.40
   1   2   8  377.76   37.60
   1   2   8  432.66   51.29
   1   2   8  406.76   29.30
   1   2   8  480.15   54.39
   1   2   8  385.16   29.50
  -1  -2  -8  451.45   38.50
  -1  -2  -8  426.26   34.20
  -1  -2  -8  436.46   30.10
  -1  -2  -8  394.16   29.90
  -1  -2  -8  431.76   51.59
  -1  -2  -8  415.36   50.99
   1   1   8  634.54   41.50
   1   1   8  593.54   49.90
   1   1   8  567.34   41.80
   1   1   8  558.04   55.69
   1   1   8  543.45   43.50
   1   1   8  586.84   41.50
  -1  -1  -8  623.84   50.19
  -1  -1  -8  627.54   42.30
  -1  -1  -8  589.44   56.39
  -1  -1  -8  623.14   42.20
  -1  -1  -8  677.63   44.70
   1   0   8   -2.90    3.50
   1   0   8    2.90    7.30
   1   0   8   10.30   11.10
   1   0   8    0.80    2.40
   1   0   8   -9.60    7.20
   1   0   8   -1.00    4.70
   1   0   8    1.30    3.10
  -1   0  -8  -10.20    8.50
  -1   0  -8    6.60    3.40
  -1   0  -8    4.00    4.20
  -1   0  -8   -4.00    2.20
  -1   0  -8    3.50   10.60
  -1   0  -8   -3.60    5.80
  -1   0  -8   -0.70    4.50
   1  -1   8  544.55   41.50
   1  -1   8  633.74   55.99
   1  -1   8  613.64   40.50
   1  -1   8  537.55   46.30
   1  -1   8  579.44   54.79
   1  -1   8  550.34   41.00
   1  -1   8  554.34   41.30
   1  -1   8  578.74   39.80
  -1   1  -8  609.04   43.50
  -1   1  -8  592.94   48.70
  -1   1  -8  600.64   55.09
  -1   1  -8  647.24   40.90
  -1   1  -8  668.63   42.40
  -1   1  -8  652.83   41.40
  -1   1  -8  564.94   54.79
   1  -2   8  386.06   29.00
   1  -2   8  391.46   30.90
   1  -2   8  352.26   46.60
   1  -2   8  378.56   34.10
   1  -2   8  409.46   28.60
   1  -2   8  447.86   28.90
   1  -2   8  413.46   30.20
   1  -2   8  381.56   46.20
   1  -2   8  381.16   29.10
   1  -2   8  381.26   27.70
  -1   2  -8  424.86   29.80
  -1   2  -8  447.26   38.00
  -1   2  -8  430.66   29.30
  -1   2  -8  413.86   30.30
  -1   2  -8  428.66   48.80
  -1   2  -8  464.55   50.79
  -1   2  -8  420.76   32.20
   1  -3   8  735.53   48.00
   1  -3   8  774.72   45.90
   1  -3   8  738.23   50.29
   1  -3   8  743.03   63.09
   1  -3   8  715.83   50.19
   1  -3   8  734.53   47.70
   1  -3   8  754.12   45.80
   1  -3   8  796.12   54.29
   1  -3   8  710.13   63.29
  -1   3  -8  829.82   49.60
  -1   3  -8  758.42   50.59
  -1   3  -8  804.22   50.29
  -1   3  -8  773.92   52.09
  -1   3  -8  634.14   55.79
   1  -4   8  606.24   55.39
   1  -4   8  710.03   44.50
   1  -4   8  663.63   57.39
   1  -4   8  644.34   43.20
  -1   4  -8  619.14   44.60
  -1   4  -8  672.83   42.70
  -1   4  -8  624.34   43.50
  -1   4  -8  664.93   43.60
  -1   4  -8  605.54   50.19
   1  -5   8  525.65   36.90
   1  -5   8  425.96   46.30
   1  -5   8  427.16   46.40
   1  -5   8  500.65   35.00
  -1   5  -8  552.14   37.40
  -1   5  -8  586.24   36.80
  -1   5  -8  541.25   36.60
  -1   5  -8  602.34   35.90
  -1   5  -8  562.14   43.80
   1  -6   8  278.27   35.30
   1  -6   8  301.37   21.90
   1  -6   8  299.87   37.00
   1  -6   8  264.87   21.40
  -1   6  -8  257.77   20.50
  -1   6  -8  281.17   20.20
  -1   6  -8  294.87   28.20
  -1   6  -8  312.07   21.90
  -1   6  -8  293.37   21.60
   1  -7   8   83.89   18.10
   1  -7   8   75.89    9.60
   1  -7   8   77.19   17.00
   1  -7   8   75.99    9.80
  -1   7  -8   90.19   15.80
  -1   7  -8   81.39    7.70
  -1   7  -8   94.49    9.10
  -1   7  -8   96.69   10.60
  -1   7  -8   73.49    9.50
   1  -8   8   75.19    8.80
   1  -8   8   88.79    9.50
   1  -8   8   56.19   13.20
  -1   8  -8  103.69    7.80
  -1   8  -8   98.19    8.90
  -1   8  -8  106.19    8.00
  -1   8  -8   91.19   16.10
  -1   9  -8   21.90    9.00
  -1   9  -8   15.60    2.50
  -1   9  -8   21.10    4.00
  -1   9  -8   16.10    2.50
  -1  10  -8    4.60    7.10
  -1  11  -8  127.99   19.70
   1  18   9  241.38   33.00
  -1 -18  -9  269.37   50.89
   1  17   9  107.69   20.50
  -1 -17  -9  133.79   34.10
   1  16   9   87.59   23.30
   1  16   9   84.69   17.50
  -1 -16  -9   94.69   30.00
   1  15   9  451.45   50.49
   1  15   9  448.46   39.40
  -1 -15  -9  506.15   63.19
   1  14   9  219.48   27.20
   1  14   9  254.77   34.80
  -1 -14  -9  234.58   31.20
  -1 -14  -9  286.27   44.40
  -1 -14  -9  209.08   30.70
   1  13   9   36.50   10.90
   1  13   9   40.00   15.60
  -1 -13  -9   27.00   17.70
  -1 -13  -9   28.50   17.40
  -1 -13  -9   21.90   16.80
   1  12   9  486.65   37.60
   1  12   9  436.56   42.00
  -1 -12  -9  470.25   55.49
  -1 -12  -9  452.25   58.39
  -1 -12  -9  426.76   55.49
   1  11   9  385.06   40.50
   1  11   9  317.87   29.00
   1  11   9  365.56   50.39
  -1 -11  -9  316.87   50.39
  -1 -11  -9  340.77   45.10
  -1 -11  -9  360.46   50.89
   1  10   9   13.20    7.80
   1  10   9   14.60   14.80
   1  10   9   10.30    6.60
   1  10   9    7.80    9.70
  -1 -10  -9   14.80   17.00
  -1 -10  -9    2.50   10.20
  -1 -10  -9    9.60   15.80
   1   9   9  839.72   63.19
   1   9   9  855.71   58.69
   1   9   9  791.42   59.49
   1   9   9  941.91   65.49
   1   9   9  961.60   75.29
  -1  -9  -9  800.52   68.09
  -1  -9  -9  829.42   54.79
  -1  -9  -9  889.31   80.89
  -1  -9  -9  842.52   82.59
   1   8   9 1567.14  102.59
   1   8   9 1627.04  105.99
   1   8   9 1702.33  117.19
   1   8   9 1586.44  103.39
   1   8   9 1647.94  101.59
  -1  -8  -9 1498.05  125.99
  -1  -8  -9 1569.74  103.89
  -1  -8  -9 1395.46  109.09
  -1  -8  -9 1625.04  125.39
   1   7   9  145.39   18.30
   1   7   9   86.39   23.10
   1   7   9  119.89   15.70
   1   7   9  134.09   20.30
   1   7   9  107.79   16.00
  -1  -7  -9  116.09   21.40
  -1  -7  -9  119.49   19.90
  -1  -7  -9   90.09   26.90
  -1  -7  -9  100.09   30.80
   1   6   9  151.08   19.40
   1   6   9  223.78   19.40
   1   6   9  149.69   18.00
   1   6   9  120.39   19.90
   1   6   9  174.98   29.50
  -1  -6  -9  144.89   34.00
  -1  -6  -9  171.68   24.60
  -1  -6  -9  128.09   33.10
   1   5   9 2786.92  170.48
   1   5   9 2690.43  172.68
   1   5   9 2690.13  168.98
   1   5   9 2739.43  181.88
   1   5   9 2681.03  170.08
  -1  -5  -9 2985.80  194.48
  -1  -5  -9 2745.33  193.48
  -1  -5  -9 2731.63  165.78
  -1  -5  -9 2808.02  177.48
   1   4   9 1601.64  114.79
   1   4   9 1567.94  106.59
   1   4   9 1882.71  127.59
   1   4   9 1543.55  102.89
   1   4   9 1503.05  103.79
   1   4   9 1680.93  104.49
  -1  -4  -9 1692.93  126.79
  -1  -4  -9 1696.03  112.59
  -1  -4  -9 1825.92  127.59
   1   3   9  251.87   40.00
   1   3   9  231.98   31.50
   1   3   9  178.28   23.30
   1   3   9  212.38   18.70
   1   3   9  233.38   38.60
   1   3   9  236.98   19.90
   1   3   9  183.08   21.00
  -1  -3  -9  196.58   37.40
  -1  -3  -9  211.98   19.50
  -1  -3  -9  174.98   34.90
  -1  -3  -9  170.58   26.80
  -1  -3  -9  218.48   18.80
   1   2   9 3051.19  196.18
   1   2   9 2673.93  173.38
   1   2   9 2913.31  195.08
   1   2   9 2811.52  185.08
   1   2   9 2662.43  174.38
   1   2   9 2883.41  174.58
   1   2   9 2813.62  177.38
  -1  -2  -9 2941.71  174.98
  -1  -2  -9 2876.91  196.08
  -1  -2  -9 2745.23  193.28
  -1  -2  -9 2877.01  174.38
  -1  -2  -9 3000.50  185.08
   1   1   9 2541.45  169.18
   1   1   9 2732.13  189.38
   1   1   9 2823.12  170.48
   1   1   9 2607.64  172.68
   1   1   9 2608.24  179.58
   1   1   9 2620.44  170.48
  -1  -1  -9 3101.09  171.58
  -1  -1  -9 2927.41  190.88
  -1  -1  -9 2877.61  171.08
  -1  -1  -9 3022.30  181.98
   1   0   9    6.50    7.60
   1   0   9    1.10    3.20
   1   0   9   -2.20    2.40
   1   0   9   -5.70   10.20
   1   0   9   -0.90    3.70
   1   0   9    3.40   10.60
   1   0   9   -0.10    4.60
  -1   0  -9   -5.60   10.60
  -1   0  -9    0.50    2.50
  -1   0  -9   -0.80    5.30
  -1   0  -9  -10.40    5.50
  -1   0  -9    3.00    4.20
  -1   0  -9    2.50   11.20
   1  -1   9 2497.55  169.68
   1  -1   9 2689.23  170.48
   1  -1   9 2481.95  167.58
   1  -1   9 2561.44  169.48
   1  -1   9 2691.73  168.58
   1  -1   9 2609.04  185.98
   1  -1   9 2476.65  175.88
   1  -1   9 2907.31  189.08
  -1   1  -9 3232.48  191.18
  -1   1  -9 3019.00  173.18
  -1   1  -9 3160.38  170.38
  -1   1  -9 2844.02  170.48
  -1   1  -9 2978.30  180.48
  -1   1  -9 3012.50  190.18
   1  -2   9 2899.21  193.88
   1  -2   9 2761.82  174.88
   1  -2   9 2687.63  176.98
   1  -2   9 2846.62  175.28
   1  -2   9 2789.32  174.08
   1  -2   9 2774.92  173.28
   1  -2   9 2882.31  176.18
   1  -2   9 2615.84  180.88
   1  -2   9 2626.14  190.68
  -1   2  -9 3179.18  175.38
  -1   2  -9 2985.40  185.98
  -1   2  -9 2924.71  176.58
  -1   2  -9 3039.00  194.28
  -1   2  -9 2915.21  175.58
  -1   2  -9 2999.30  178.78
  -1   2  -9 3186.18  196.48
   1  -3   9  204.58   15.10
   1  -3   9  187.08   20.20
   1  -3   9  206.58   16.30
   1  -3   9  201.18   33.40
   1  -3   9  235.98   17.20
   1  -3   9  204.88   15.80
   1  -3   9  204.48   24.40
   1  -3   9  253.87   37.90
   1  -3   9  206.78   18.70
  -1   3  -9  215.18   17.70
  -1   3  -9  228.58   24.10
  -1   3  -9  202.58   18.10
  -1   3  -9  195.98   27.50
  -1   3  -9  195.98   18.60
   1  -4   9 1502.25  116.39
   1  -4   9 1571.34   95.89
   1  -4   9 1557.84  104.19
   1  -4   9 1548.05   95.89
   1  -4   9 1642.44  101.09
   1  -4   9 1679.13  101.99
   1  -4   9 1541.95  116.29
  -1   4  -9 1652.23  101.49
  -1   4  -9 1764.12  100.79
  -1   4  -9 1596.74  101.79
  -1   4  -9 1666.13  110.69
  -1   4  -9 1664.73  103.59
   1  -5   9 2629.04  168.08
   1  -5   9 2768.22  166.68
   1  -5   9 2589.44  182.88
   1  -5   9 2432.76  181.48
  -1   5  -9 2905.21  168.48
  -1   5  -9 2713.03  168.28
  -1   5  -9 2944.51  167.28
  -1   5  -9 2843.12  169.78
  -1   5  -9 2822.62  177.48
   1  -6   9  142.69   26.40
   1  -6   9  162.18   12.40
   1  -6   9  147.09   27.30
   1  -6   9  180.88   15.60
  -1   6  -9  159.88   17.90
  -1   6  -9  166.38   14.20
  -1   6  -9  176.08   15.50
  -1   6  -9  154.58   23.10
  -1   6  -9  163.88   15.20
   1  -7   9   93.19   20.40
   1  -7   9  127.69   13.60
   1  -7   9  105.09   22.90
   1  -7   9  142.39   12.40
  -1   7  -9   86.99   13.20
  -1   7  -9  112.89   19.50
  -1   7  -9  102.19   12.40
  -1   7  -9  107.09   13.40
  -1   7  -9  117.69   10.80
   1  -8   9 1663.33  100.89
   1  -8   9 1723.03  101.39
   1  -8   9 1582.04  110.69
   1  -8   9 1535.25  111.39
  -1   8  -9 1653.43  110.59
  -1   8  -9 1591.64  101.79
  -1   8  -9 1633.34  100.99
  -1   8  -9 1689.23  100.39
   1  -9   9  916.01   52.79
   1  -9   9  891.21   52.59
   1  -9   9  802.62   58.09
   1  -9   9  810.72   58.79
  -1   9  -9  879.81   54.09
  -1   9  -9  831.32   54.49
  -1   9  -9  948.41   65.59
  -1   9  -9  786.32   55.29
  -1  10  -9    3.90    3.40
  -1  10  -9   14.50    9.80
  -1  11  -9  334.07   23.50
  -1  11  -9  342.07   33.60
  -1  12  -9  481.65   32.30
  -1 -18 -10   22.50   23.50
   1  17  10   19.00   10.80
  -1 -17 -10    3.90   15.30
   1  16  10   26.80   17.00
   1  16  10   10.70   10.50
  -1 -16 -10   22.80   19.00
   1  15  10   46.90   14.20
   1  15  10   43.10   18.00
  -1 -15 -10   64.09   24.50
   1  14  10   19.60    9.90
   1  14  10   23.40   15.40
  -1 -14 -10   24.50   17.00
  -1 -14 -10    6.70   14.40
  -1 -14 -10   26.60   16.90
   1  13  10   11.90    8.10
   1  13  10   22.40   13.40
  -1 -13 -10   18.50   18.40
  -1 -13 -10    5.00   16.60
  -1 -13 -10   19.30   15.80
   1  12  10   47.40   16.70
   1  12  10   32.70   11.00
  -1 -12 -10   44.90   24.10
  -1 -12 -10   31.80   17.70
  -1 -12 -10   43.70   20.90
   1  11  10   52.19   16.10
   1  11  10   25.40    9.40
  -1 -11 -10   36.90   16.90
  -1 -11 -10   58.69   25.60
  -1 -11 -10   57.99   26.50
   1  10  10    6.90   14.30
   1  10  10   19.80    8.10
   1  10  10    9.90   10.00
  -1 -10 -10   33.30   22.70
  -1 -10 -10   28.70   15.10
  -1 -10 -10   10.10   19.10
   1   9  10  131.49   19.90
   1   9  10   94.19   26.00
   1   9  10  124.29   22.10
   1   9  10  112.69   16.90
   1   9  10  148.49   20.20
  -1  -9 -10  174.68   40.80
  -1  -9 -10  148.49   35.50
  -1  -9 -10  106.19   16.70
  -1  -9 -10  101.19   23.60
   1   8  10  360.86   29.30
   1   8  10  378.26   38.90
   1   8  10  372.76   30.70
   1   8  10  335.87   30.10
   1   8  10  313.47   44.60
  -1  -8 -10  231.68   48.50
  -1  -8 -10  298.67   38.90
  -1  -8 -10  359.86   55.09
  -1  -8 -10  294.07   33.90
   1   7  10  238.58   28.80
   1   7  10  174.78   21.40
   1   7  10  244.88   26.00
   1   7  10  204.98   23.80
   1   7  10  129.39   28.60
  -1  -7 -10  254.37   45.90
  -1  -7 -10  243.88   29.90
  -1  -7 -10  199.08   43.80
   1   6  10   37.20   10.00
   1   6  10   55.09   18.60
   1   6  10   44.50   10.10
   1   6  10   44.80   13.20
   1   6  10   35.10    9.30
  -1  -6 -10   60.89   26.50
  -1  -6 -10   55.19    6.80
  -1  -6 -10   50.09   15.40
  -1  -6 -10   29.30   20.70
  -1  -6 -10   33.90   11.00
   1   5  10  378.86   30.80
   1   5  10  364.96   30.30
   1   5  10  387.06   34.00
   1   5  10  381.06   29.60
   1   5  10  332.17   43.50
  -1  -5 -10  323.27   53.49
  -1  -5 -10  349.37   41.10
  -1  -5 -10  315.47   52.69
   1   4  10  223.98   27.30
   1   4  10  217.48   23.80
   1   4  10  230.78   21.30
   1   4  10  204.38   19.80
   1   4  10  275.97   46.00
   1   4  10  209.58   32.50
  -1  -4 -10  215.48   31.10
  -1  -4 -10  271.27   45.90
  -1  -4 -10  181.98   39.20
   1   3  10  356.66   51.89
   1   3  10  288.37   46.00
   1   3  10  247.28   23.60
   1   3  10  298.67   38.40
   1   3  10  268.77   23.00
   1   3  10  287.57   24.10
   1   3  10  244.28   29.30
  -1  -3 -10  267.97   23.10
  -1  -3 -10  335.87   50.39
  -1  -3 -10  293.07   36.90
  -1  -3 -10  268.97   45.30
  -1  -3 -10  246.78   23.40
   1   2  10  151.28   16.70
   1   2  10  120.09   23.90
   1   2  10  141.39   31.90
   1   2  10   98.69   14.30
   1   2  10  133.39   31.10
   1   2  10  108.89   14.50
   1   2  10  125.69   18.40
  -1  -2 -10   60.89   23.20
  -1  -2 -10   69.89   19.10
  -1  -2 -10   90.19   13.70
  -1  -2 -10   70.49   12.60
  -1  -2 -10   91.09   27.00
   1   1  10  386.36   30.90
   1   1  10  370.16   33.00
   1   1  10  413.16   30.70
   1   1  10  421.66   55.09
   1   1  10  331.57   28.80
   1   1  10  339.47   42.10
  -1  -1 -10  482.75   57.69
  -1  -1 -10  383.86   30.40
  -1  -1 -10  440.46   41.10
  -1  -1 -10  409.06   31.10
   1   0  10   -4.60   10.50
   1   0  10    4.20    5.50
   1   0  10   -1.60    7.30
   1   0  10   -0.20    3.30
   1   0  10   -2.30    3.00
   1   0  10    1.90    3.30
   1   0  10    5.00   12.70
  -1   0 -10   -7.10   10.20
  -1   0 -10    6.60    9.70
  -1   0 -10    0.50    2.70
  -1   0 -10   -0.20    4.00
  -1   0 -10   -0.10   12.60
   1  -1  10  378.16   30.20
   1  -1  10  411.96   52.69
   1  -1  10  369.66   50.99
   1  -1  10  369.16   28.80
   1  -1  10  362.16   30.70
   1  -1  10  373.46   28.20
   1  -1  10  362.76   30.20
   1  -1  10  323.67   38.70
  -1   1 -10  386.46   29.70
  -1   1 -10  375.66   43.00
  -1   1 -10  484.95   57.89
  -1   1 -10  402.26   30.80
  -1   1 -10  507.75   58.09
   1  -2  10  123.79   16.90
   1  -2  10  112.29   14.20
   1  -2  10   99.49   18.80
   1  -2  10  126.99   13.20
   1  -2  10  127.69   15.90
   1  -2  10  118.09   13.30
   1  -2  10   84.19   24.30
   1  -2  10  122.89   14.90
   1  -2  10  148.59   31.10
  -1   2 -10   66.49   12.80
  -1   2 -10   78.49   12.30
  -1   2 -10   80.29   15.60
  -1   2 -10   85.09   19.80
  -1   2 -10  105.09   15.00
  -1   2 -10   90.29   26.10
  -1   2 -10  108.29   30.30
   1  -3  10  248.38   20.40
   1  -3  10  340.17   45.10
   1  -3  10  244.48   39.80
   1  -3  10  250.97   23.10
   1  -3  10  294.97   21.80
   1  -3  10  270.77   20.60
   1  -3  10  265.27   23.30
  -1   3 -10  263.97   23.40
  -1   3 -10  298.87   23.30
  -1   3 -10  281.57   22.20
  -1   3 -10  233.98   33.20
  -1   3 -10  279.97   26.00
   1  -4  10  230.38   16.10
   1  -4  10  190.68   35.40
   1  -4  10  192.18   36.10
   1  -4  10  224.08   20.20
   1  -4  10  244.88   20.20
   1  -4  10  197.78   24.50
   1  -4  10  208.78   15.80
  -1   4 -10  246.28   26.10
  -1   4 -10  240.98   19.30
  -1   4 -10  224.88   19.90
  -1   4 -10  180.18   28.70
  -1   4 -10  235.08   21.00
   1  -5  10  379.96   28.00
   1  -5  10  387.76   48.20
   1  -5  10  333.17   46.00
   1  -5  10  375.96   29.20
  -1   5 -10  424.46   28.60
  -1   5 -10  361.36   29.40
  -1   5 -10  379.46   31.20
  -1   5 -10  366.56   28.90
  -1   5 -10  355.26   40.50
   1  -6  10   38.80    8.00
   1  -6  10   41.60   18.50
   1  -6  10   50.29    6.90
   1  -6  10   42.40    8.70
   1  -6  10   16.90   14.70
  -1   6 -10   46.50    9.60
  -1   6 -10   56.49   11.70
  -1   6 -10   60.09    8.90
  -1   6 -10   70.19   17.20
  -1   6 -10   45.70    8.90
   1  -7  10  211.98   18.90
   1  -7  10  189.98   32.80
   1  -7  10  205.78   18.70
   1  -7  10  161.38   31.40
  -1   7 -10  234.78   18.40
  -1   7 -10  216.28   19.60
  -1   7 -10  286.67   33.90
  -1   7 -10  234.28   21.00
   1  -8  10  354.56   25.20
   1  -8  10  310.57   38.60
   1  -8  10  236.38   35.70
   1  -8  10  355.46   24.90
  -1   8 -10  316.07   26.30
  -1   8 -10  320.57   37.20
  -1   8 -10  316.97   24.00
  -1   8 -10  303.67   25.10
   1  -9  10   93.09   18.50
   1  -9  10  114.49   12.10
   1  -9  10  129.99   11.80
  -1   9 -10  149.49   15.70
  -1   9 -10  145.09   23.40
  -1  10 -10   21.60   11.90
  -1  10 -10   27.40    7.00
  -1  11 -10   48.50    9.00
  -1  12 -10   76.89   11.20
  -1  13 -10   12.10    6.40
   1  17  11   31.30   13.60
   1  17  11   12.50   18.20
  -1 -17 -11   40.80   24.60
   1  16  11   25.60   12.40
   1  16  11   31.00   18.10
  -1 -16 -11   32.90   22.20
   1  15  11  483.95   54.29
   1  15  11  415.16   44.60
  -1 -15 -11  437.66   43.80
  -1 -15 -11  457.95   61.79
  -1 -15 -11  436.26   42.90
   1  14  11  103.59   20.00
   1  14  11  155.58   29.90
  -1 -14 -11  163.38   34.00
  -1 -14 -11  110.19   30.20
  -1 -14 -11  161.88   35.40
   1  13  11   41.40   17.20
   1  13  11   39.40   12.10
  -1 -13 -11   45.80   21.30
  -1 -13 -11   41.60   23.10
  -1 -13 -11   40.90   22.90
   1  12  11  442.86   37.50
   1  12  11  443.76   49.60
  -1 -12 -11  416.86   63.99
  -1 -12 -11  418.56   54.59
  -1 -12 -11  441.66   62.99
   1  11  11  389.76   34.00
   1  11  11  423.36   45.90
  -1 -11 -11  416.36   60.49
  -1 -11 -11  319.67   46.30
  -1 -11 -11  468.55   68.49
   1  10  11   47.10   20.90
   1  10  11   39.50   11.20
   1  10  11   85.09   19.10
  -1 -10 -11   39.60    6.10
  -1 -10 -11   11.80   21.00
  -1 -10 -11   47.70   24.50
  -1 -10 -11   49.90   17.00
   1   9  11  411.26   33.00
   1   9  11  412.66   34.60
   1   9  11  367.36   33.20
   1   9  11  371.06   41.90
   1   9  11  356.06   50.29
  -1  -9 -11  310.77   56.89
  -1  -9 -11  344.17   33.70
  -1  -9 -11  349.96   45.40
  -1  -9 -11  404.96   62.19
   1   8  11 1585.04  109.09
   1   8  11 1834.22  112.39
   1   8  11 1806.42  116.19
   1   8  11 1620.14  125.49
   1   8  11 1704.83  111.39
  -1  -8 -11 1835.32  139.09
  -1  -8 -11 1459.05  117.09
  -1  -8 -11 1751.92  140.99
  -1  -8 -11 1702.83  115.19
   1   7  11  268.97   26.30
   1   7  11  265.57   40.50
   1   7  11  274.97   25.00
   1   7  11  304.27   27.10
   1   7  11  282.07   34.00
  -1  -7 -11  241.98   33.10
  -1  -7 -11  242.38   51.29
  -1  -7 -11  250.07   48.90
   1   6  11  509.85   59.39
   1   6  11  502.15   42.00
   1   6  11  563.04   46.70
   1   6  11  620.44   43.60
   1   6  11  505.25   40.80
  -1  -6 -11  549.05   72.89
  -1  -6 -11  542.25   76.09
  -1  -6 -11  614.64   51.39
   1   5  11 1903.61  123.79
   1   5  11 1823.22  119.59
   1   5  11 1870.41  118.49
   1   5  11 1770.72  132.09
   1   5  11 1953.10  119.99
  -1  -5 -11 1723.53  144.69
  -1  -5 -11 1969.80  129.49
  -1  -5 -11 1698.93  142.49
   1   4  11  332.37   28.00
   1   4  11  432.66   65.79
   1   4  11  411.16   58.79
   1   4  11  326.77   43.50
   1   4  11  361.86   33.00
   1   4  11  341.07   28.90
   1   4  11  312.57   28.70
  -1  -4 -11  373.16   57.39
  -1  -4 -11  291.37   51.99
  -1  -4 -11  295.27   39.90
   1   3  11   33.50    8.70
   1   3  11   42.70   22.10
   1   3  11   18.10   17.90
   1   3  11   28.20    8.10
   1   3  11   28.30    8.70
   1   3  11   43.80   13.20
   1   3  11   28.20   14.50
  -1  -3 -11   38.50    8.90
  -1  -3 -11   38.30    9.40
  -1  -3 -11   35.00   22.00
  -1  -3 -11   33.70   19.20
  -1  -3 -11   29.70   14.40
   1   2  11 1156.28   81.69
   1   2  11 1473.55  108.19
   1   2  11 1056.19   91.09
   1   2  11 1286.07   81.89
   1   2  11 1128.89   80.29
   1   2  11 1081.59   83.79
   1   2  11 1239.38  103.59
  -1  -2 -11 1319.57  105.39
  -1  -2 -11 1268.07   82.19
  -1  -2 -11 1282.17   93.79
  -1  -2 -11 1393.36  108.59
  -1  -2 -11 1394.26   82.59
   1   1  11  998.60   66.69
   1   1  11  905.71   67.59
   1   1  11 1123.89   91.59
   1   1  11  922.11   69.99
   1   1  11 1035.40   67.59
   1   1  11  939.81   77.69
  -1  -1 -11 1057.79   68.39
  -1  -1 -11 1091.49   68.89
  -1  -1 -11  977.60   78.69
  -1  -1 -11  999.20   89.09
   1   0  11    0.70    4.60
   1   0  11    2.00    3.80
   1   0  11   -8.80   11.20
   1   0  11    7.40    7.10
   1   0  11    0.50    8.70
   1   0  11    4.70   13.70
   1   0  11    0.20    4.70
   1   0  11   -2.00    2.90
  -1   0 -11    1.00    2.90
  -1   0 -11    4.30   13.00
  -1   0 -11   -3.60    7.80
  -1   0 -11   15.00   15.60
  -1   0 -11    2.50    5.40
   1  -1  11 1035.40   67.39
   1  -1  11  978.50   69.29
   1  -1  11 1104.59   68.69
   1  -1  11 1005.00   70.29
   1  -1  11 1058.49   78.39
   1  -1  11 1138.39   92.19
   1  -1  11 1017.10   88.89
   1  -1  11 1049.70   70.19
  -1   1 -11  983.50   69.59
  -1   1 -11 1008.50   68.79
  -1   1 -11  882.11   87.19
  -1   1 -11 1051.69   89.99
  -1   1 -11 1068.99   81.19
   1  -2  11 1173.88   81.49
   1  -2  11 1263.17  100.99
   1  -2  11 1227.58   98.99
   1  -2  11 1142.99   79.29
   1  -2  11 1147.29   78.59
   1  -2  11 1131.09   86.09
   1  -2  11 1171.68   76.49
   1  -2  11 1205.28   78.99
   1  -2  11 1117.59   77.19
  -1   2 -11 1487.15  106.09
  -1   2 -11 1216.08   80.39
  -1   2 -11 1302.97   79.79
  -1   2 -11 1370.16   92.99
   1  -3  11   21.20    6.40
   1  -3  11   31.50   18.20
   1  -3  11   35.60    7.30
   1  -3  11    9.60   15.00
   1  -3  11   42.40    9.50
   1  -3  11   40.10    9.40
   1  -3  11   35.60    6.90
   1  -3  11   35.80    6.20
  -1   3 -11   28.10    7.70
  -1   3 -11   55.59   17.00
  -1   3 -11   34.70   14.70
  -1   3 -11   45.20   10.40
   1  -4  11  358.76   49.40
   1  -4  11  318.07   47.30
   1  -4  11  315.77   23.00
   1  -4  11  304.27   26.40
   1  -4  11  336.47   27.40
   1  -4  11  304.87   30.40
   1  -4  11  320.67   22.80
  -1   4 -11  350.76   30.60
  -1   4 -11  348.97   26.10
  -1   4 -11  310.57   26.60
  -1   4 -11  350.86   41.30
  -1   4 -11  318.47   27.70
   1  -5  11 1958.00  118.79
   1  -5  11 1857.11  116.89
   1  -5  11 1882.31  138.09
   1  -5  11 1830.32  137.09
  -1   5 -11 1987.70  117.49
  -1   5 -11 1788.62  128.79
  -1   5 -11 1846.82  118.19
  -1   5 -11 1893.21  121.49
  -1   5 -11 1770.82  118.69
   1  -6  11  554.24   41.90
   1  -6  11  563.74   41.90
   1  -6  11  543.15   39.20
   1  -6  11  524.05   63.59
   1  -6  11  555.54   64.69
  -1   6 -11  671.13   42.10
  -1   6 -11  613.14   45.30
  -1   6 -11  628.14   53.79
  -1   6 -11  619.04   42.90
  -1   6 -11  603.14   43.40
   1  -7  11  262.57   40.10
   1  -7  11  272.97   23.10
   1  -7  11  210.88   36.20
  -1   7 -11  248.48   23.60
  -1   7 -11  275.77   28.90
  -1   7 -11  275.27   35.80
  -1   7 -11  309.87   22.90
   1  -8  11 1751.22  124.39
   1  -8  11 1862.81  109.59
   1  -8  11 1494.35  122.59
   1  -8  11 1803.32  109.79
  -1   8 -11 1695.53  110.59
  -1   8 -11 1736.63  116.29
  -1   8 -11 1797.72  122.39
   1  -9  11  427.36   29.90
   1  -9  11  420.26   40.60
   1  -9  11  430.86   29.30
  -1   9 -11  377.96   44.20
  -1   9 -11  351.96   30.80
   1 -10  11   55.69    5.80
   1 -10  11   55.29   12.00
   1 -10  11   28.90    9.70
   1 -10  11   62.79    6.40
  -1  10 -11   42.60    9.80
  -1  11 -11  379.36   30.10
  -1  12 -11  459.75   35.00
  -1  13 -11   36.10    9.80
   1  17  12   -0.10    9.60
  -1 -17 -12    9.20   17.90
   1  16  12   12.70   16.80
   1  16  12    2.60    9.90
  -1 -16 -12   -3.70   16.10
   1  15  12   48.80   21.30
   1  15  12   62.49   16.70
  -1 -15 -12   58.99   22.80
  -1 -15 -12   75.89   27.10
  -1 -15 -12   84.29   23.50
   1  14  12   48.10   14.10
   1  14  12   80.99   22.80
  -1 -14 -12   65.99   28.70
  -1 -14 -12   45.30   23.30
  -1 -14 -12   79.19   27.00
   1  13  12    8.20   13.40
   1  13  12   -4.70    7.10
  -1 -13 -12   -6.30   18.00
  -1 -13 -12    4.90   20.40
  -1 -13 -12   -3.40    8.20
   1  12  12   33.20   17.00
   1  12  12   24.30   10.70
  -1 -12 -12   23.50   23.40
  -1 -12 -12   36.40   24.10
  -1 -12 -12   42.20   19.60
   1  11  12   22.40   10.00
   1  11  12   49.00   16.60
  -1 -11 -12    6.20   19.60
  -1 -11 -12   68.59   30.00
  -1 -11 -12   57.59   20.70
   1  10  12   49.10   12.80
   1  10  12   62.39   25.50
   1  10  12   87.19   21.20
  -1 -10 -12   96.09   35.20
  -1 -10 -12   42.30   17.50
  -1 -10 -12   73.99   29.30
   1   9  12   41.00   12.30
   1   9  12   35.30   10.60
   1   9  12   33.60   20.10
   1   9  12   68.89   15.70
   1   9  12   49.90   16.00
  -1  -9 -12   54.89   31.20
  -1  -9 -12   21.00   14.50
  -1  -9 -12   37.40   25.10
   1   8  12  422.06   44.30
   1   8  12  368.96   51.29
   1   8  12  353.76   33.20
   1   8  12  371.06   33.60
   1   8  12  364.86   32.00
  -1  -8 -12  352.06   41.20
  -1  -8 -12  361.06   45.90
  -1  -8 -12  421.16   65.19
  -1  -8 -12  379.76   64.99
   1   7  12   84.69   14.60
   1   7  12   76.79   15.30
   1   7  12   81.09   24.30
   1   7  12   62.99   17.80
   1   7  12   52.79   13.20
  -1  -7 -12   67.09   33.00
  -1  -7 -12   24.70   22.90
  -1  -7 -12   47.60   17.30
   1   6  12   -7.10    7.40
   1   6  12   -5.10   12.10
   1   6  12   -4.00    4.40
   1   6  12   -4.30    4.80
   1   6  12   -4.10    3.50
  -1  -6 -12    1.20   22.30
  -1  -6 -12    9.40   20.60
  -1  -6 -12    5.50    4.70
  -1  -6 -12    3.10   10.20
   1   5  12  266.57   40.90
   1   5  12  246.98   32.00
   1   5  12  253.67   29.00
   1   5  12  238.08   27.20
   1   5  12  281.17   26.20
  -1  -5 -12  299.47   38.80
  -1  -5 -12  405.76   62.59
  -1  -5 -12  326.27   57.59
   1   4  12  233.68   46.30
   1   4  12  204.08   24.30
   1   4  12  221.08   36.60
   1   4  12  231.38   24.90
   1   4  12  231.68   24.70
   1   4  12  236.08   52.39
   1   4  12  209.28   28.20
  -1  -4 -12  272.57   50.89
  -1  -4 -12  208.88   22.70
  -1  -4 -12  180.38   31.70
  -1  -4 -12  174.38   22.80
  -1  -4 -12  221.28   46.50
   1   3  12   51.49   19.70
   1   3  12   18.10    8.30
   1   3  12   33.50    9.20
   1   3  12   48.20   24.20
   1   3  12    8.40   18.70
   1   3  12   29.50    8.50
   1   3  12   39.70   13.00
  -1  -3 -12   29.20   15.80
  -1  -3 -12   13.20   19.50
  -1  -3 -12   36.30   23.60
  -1  -3 -12   35.30    9.60
  -1  -3 -12   17.40    7.70
   1   2  12  291.97   33.50
   1   2  12  309.67   41.20
   1   2  12  425.56   59.49
   1   2  12  315.77   26.20
   1   2  12  307.57   51.29
   1   2  12  236.88   27.80
   1   2  12  286.37   25.90
  -1  -2 -12  280.17   25.80
  -1  -2 -12  299.57   50.89
  -1  -2 -12  260.97   39.30
  -1  -2 -12  251.87   50.99
  -1  -2 -12  304.37   26.70
   1   1  12  141.89   19.50
   1   1  12  169.38   24.10
   1   1  12  132.19   17.80
   1   1  12  114.29   26.00
   1   1  12  156.88   19.30
   1   1  12  161.18   37.30
   1   1  12  206.58   40.70
  -1  -1 -12  182.98   30.40
  -1  -1 -12  137.79   19.70
  -1  -1 -12  217.28   42.60
  -1  -1 -12  184.88   21.10
   1   0  12   -0.50    8.50
   1   0  12    0.60    4.20
   1   0  12   10.10   16.40
   1   0  12    0.40    4.60
   1   0  12   -5.00    5.70
   1   0  12   -1.00    4.60
   1   0  12   -3.20   13.10
   1   0  12    0.30    5.10
  -1   0 -12    1.10    6.40
  -1   0 -12    3.30   14.50
  -1   0 -12    1.00    3.10
  -1   0 -12  -15.60    9.00
  -1   0 -12   -3.70   15.30
   1  -1  12  136.89   19.10
   1  -1  12   95.59   28.90
   1  -1  12  170.48   19.00
   1  -1  12  132.59   19.70
   1  -1  12  153.98   17.70
   1  -1  12  111.69   17.40
   1  -1  12  143.59   35.90
   1  -1  12  149.99   26.60
  -1   1 -12  130.89   17.40
  -1   1 -12  152.78   19.70
  -1   1 -12  220.68   42.90
  -1   1 -12  212.58   41.10
  -1   1 -12  173.98   30.10
   1  -2  12  284.67   24.80
   1  -2  12  247.18   43.80
   1  -2  12  295.57   25.80
   1  -2  12  249.88   24.30
   1  -2  12  264.87   33.90
   1  -2  12  270.67   30.60
   1  -2  12  326.67   50.99
   1  -2  12  284.97   22.70
   1  -2  12  299.57   23.80
  -1   2 -12  265.67   38.40
  -1   2 -12  277.47   48.00
  -1   2 -12  238.38   27.50
  -1   2 -12  265.27   24.40
   1  -3  12   40.40    7.10
   1  -3  12   28.80   20.20
   1  -3  12   28.00    6.80
   1  -3  12   28.10    8.50
   1  -3  12   30.30    9.40
   1  -3  12   13.90    5.80
   1  -3  12    6.50    6.70
   1  -3  12   32.70   20.10
   1  -3  12   36.20    8.30
  -1   3 -12   28.60    8.30
  -1   3 -12   34.10    9.70
  -1   3 -12   30.20   15.40
   1  -4  12  197.28   13.80
   1  -4  12  199.08   16.40
   1  -4  12  200.38   26.40
   1  -4  12  236.58   42.50
   1  -4  12  187.68   22.00
   1  -4  12  210.38   40.90
   1  -4  12  216.68   23.40
   1  -4  12  208.98   17.00
  -1   4 -12  204.18   22.70
  -1   4 -12  205.78   23.80
  -1   4 -12  180.28   30.80
   1  -5  12  291.87   24.30
   1  -5  12  248.48   23.80
   1  -5  12  235.88   41.90
   1  -5  12  238.08   22.70
   1  -5  12  215.68   42.10
  -1   5 -12  321.67   33.90
  -1   5 -12  244.68   27.20
  -1   5 -12  341.27   42.20
  -1   5 -12  255.87   23.80
  -1   5 -12  306.57   23.90
   1  -6  12   10.40    6.60
   1  -6  12  -14.30   12.70
   1  -6  12   -5.00    3.30
   1  -6  12   15.40   17.20
   1  -6  12   -1.00    3.70
  -1   6 -12    7.40   10.90
  -1   6 -12   16.20    9.30
  -1   6 -12   -1.40    4.20
  -1   6 -12    3.30    6.10
  -1   6 -12    2.30    5.00
   1  -7  12   67.19    7.30
   1  -7  12   40.70   20.30
   1  -7  12   65.79   11.80
   1  -7  12   96.59   26.60
   1  -7  12   72.39   12.30
  -1   7 -12   46.50   13.60
  -1   7 -12   60.59   19.30
  -1   7 -12   69.49   11.50
  -1   7 -12   46.10   11.60
   1  -8  12  434.86   32.40
   1  -8  12  403.36   50.89
   1  -8  12  414.86   32.00
   1  -8  12  367.06   49.20
  -1   8 -12  413.56   33.70
  -1   8 -12  420.66   48.50
   1  -9  12   37.30    8.00
   1  -9  12   37.90   16.40
   1  -9  12   29.10    7.60
   1  -9  12   47.40   16.70
  -1   9 -12   24.00   14.00
  -1   9 -12   33.90    9.70
   1 -10  12   50.19   14.70
   1 -10  12   72.89   16.70
   1 -10  12   56.29    8.20
  -1  10 -12   72.89   13.60
  -1  11 -12   39.20   10.90
  -1  12 -12   36.50   10.20
  -1  13 -12   -1.00    6.80
  -1 -17 -13   33.90   22.70
   1  16  13   50.19   16.40
   1  16  13   71.79   25.70
  -1 -16 -13   48.20   15.20
  -1 -16 -13   68.19   16.90
  -1 -16 -13   74.29   28.70
   1  15  13  364.76   49.50
   1  15  13  398.86   41.70
  -1 -15 -13  285.57   48.50
  -1 -15 -13  231.68   44.00
  -1 -15 -13  317.37   52.39
   1  14  13  135.39   23.50
   1  14  13  100.79   26.80
  -1 -14 -13   81.39   31.90
  -1 -14 -13  161.38   35.90
  -1 -14 -13  180.58   41.70
   1  13  13   33.30   12.70
   1  13  13   13.00   14.60
  -1 -13 -13   35.20   22.10
  -1 -13 -13   -2.80   20.80
  -1 -13 -13   15.80   22.40
   1  12  13  401.16   48.10
   1  12  13  365.96   38.80
  -1 -12 -13  358.86   65.29
  -1 -12 -13  458.55   69.69
  -1 -12 -13  248.28   44.20
   1  11  13  283.57   40.50
   1  11  13  331.27   35.80
  -1 -11 -13  340.07   49.20
  -1 -11 -13  373.16   63.49
  -1 -11 -13  336.07   62.09
   1  10  13   18.10    8.80
   1  10  13   19.70   14.20
  -1 -10 -13   23.60   25.10
  -1 -10 -13   17.50   14.70
  -1 -10 -13   10.30   24.90
   1   9  13  472.25   50.09
   1   9  13  388.66   35.50
   1   9  13  501.85   63.59
   1   9  13  400.16   37.20
  -1  -9 -13  376.26   67.49
  -1  -9 -13  372.96   64.39
  -1  -9 -13  397.46   50.79
   1   8  13  498.95   61.69
   1   8  13  423.66   38.10
   1   8  13  511.95   39.90
   1   8  13  408.46   36.10
   1   8  13  404.96   47.30
  -1  -8 -13  337.67   62.49
  -1  -8 -13  333.57   65.79
   1   7  13   15.00    8.80
   1   7  13   30.80   13.90
   1   7  13   27.50   10.20
   1   7  13   25.00    9.40
   1   7  13   50.19   22.20
  -1  -7 -13    4.40   12.10
  -1  -7 -13   -2.30   18.80
  -1  -7 -13   65.99   33.60
  -1  -7 -13   13.70    4.50
   1   6  13  106.19   17.90
   1   6  13   71.89   26.00
   1   6  13   91.69   15.80
   1   6  13  116.69   22.40
   1   6  13   90.19   17.10
  -1  -6 -13   74.39   32.10
  -1  -6 -13  130.89   39.20
  -1  -6 -13  141.49   27.20
   1   5  13  511.85   45.90
   1   5  13  492.05   40.20
   1   5  13  528.95   61.89
   1   5  13  514.05   42.10
   1   5  13  521.95   41.60
  -1  -5 -13  440.36   53.79
  -1  -5 -13  546.05   77.99
  -1  -5 -13  659.33   85.99
   1   4  13  546.35   76.09
   1   4  13  622.54   79.89
   1   4  13  483.65   60.59
   1   4  13  585.34   43.80
   1   4  13  512.55   46.90
   1   4  13  540.25   43.90
   1   4  13  537.05   42.20
  -1  -4 -13  491.05   73.29
  -1  -4 -13  520.15   42.90
  -1  -4 -13  577.94   55.59
  -1  -4 -13  634.84   82.99
  -1  -4 -13  575.44   41.80
   1   3  13  307.07   35.30
   1   3  13  498.65   69.29
   1   3  13  411.16   51.49
   1   3  13  349.96   40.10
   1   3  13  367.06   32.50
   1   3  13  359.26   31.80
   1   3  13  586.74   74.59
  -1  -3 -13  400.06   33.70
  -1  -3 -13  541.25   75.49
  -1  -3 -13  399.76   32.90
  -1  -3 -13  445.16   67.09
  -1  -3 -13  412.26   50.69
   1   2  13  887.61   96.69
   1   2  13  823.52   61.19
   1   2  13  709.83   54.59
   1   2  13  859.51   56.99
   1   2  13  747.13   56.79
   1   2  13  806.52   91.99
   1   2  13  794.02   69.79
  -1  -2 -13  867.31   83.79
  -1  -2 -13  747.53   68.49
  -1  -2 -13  731.63   55.99
  -1  -2 -13  724.93   55.49
  -1  -2 -13  918.71   98.99
   1   1  13 1287.17  108.09
   1   1  13 1204.78   79.99
   1   1  13 1168.58   81.89
   1   1  13 1211.28   80.79
   1   1  13 1101.69  104.29
   1   1  13 1154.78   84.39
   1   1  13 1293.97   95.49
  -1  -1 -13 1107.09   80.69
  -1  -1 -13 1233.78   95.19
  -1  -1 -13 1255.07   82.09
  -1  -1 -13 1311.47  109.09
   1   0  13    7.00    8.10
   1   0  13   -2.30    3.90
   1   0  13   -7.20   14.60
   1   0  13    8.10    6.30
   1   0  13    1.80    4.60
   1   0  13   -0.20    9.80
   1   0  13    2.40    5.70
   1   0  13   -1.10   16.00
  -1   0 -13    0.50   16.60
  -1   0 -13   -0.80    2.20
  -1   0 -13    0.20   12.90
  -1   0 -13  -17.10   14.70
  -1   0 -13   -2.90    5.50
   1  -1  13 1103.09  103.49
   1  -1  13 1162.58   82.89
   1  -1  13 1263.87  108.29
   1  -1  13 1328.17   84.69
   1  -1  13 1273.17   93.79
   1  -1  13 1251.37   81.69
   1  -1  13 1236.38   84.29
   1  -1  13 1220.98   80.59
  -1   1 -13 1139.09   95.09
  -1   1 -13 1181.58   83.49
  -1   1 -13 1302.57  110.89
  -1   1 -13 1222.08   82.79
  -1   1 -13 1402.26  111.49
   1  -2  13  836.22   57.49
   1  -2  13  847.12   56.79
   1  -2  13  798.02   65.29
   1  -2  13  848.92   92.79
   1  -2  13  809.82   54.79
   1  -2  13  822.52   79.19
   1  -2  13  728.93   58.49
   1  -2  13  776.02   53.39
   1  -2  13  708.83   55.29
  -1   2 -13  756.12   68.89
  -1   2 -13  759.62   57.29
  -1   2 -13  794.72   56.49
   1  -3  13  419.96   28.50
   1  -3  13  353.16   29.10
   1  -3  13  389.96   29.90
   1  -3  13  340.67   40.60
   1  -3  13  374.76   56.99
   1  -3  13  358.26   56.49
   1  -3  13  423.46   33.40
   1  -3  13  336.67   32.30
   1  -3  13  361.76   30.10
  -1   3 -13  398.96   34.00
  -1   3 -13  274.47   43.20
  -1   3 -13  455.75   33.40
   1  -4  13  507.55   69.89
   1  -4  13  545.05   38.20
   1  -4  13  523.85   41.90
   1  -4  13  463.75   64.89
   1  -4  13  514.75   46.80
   1  -4  13  523.85   37.50
   1  -4  13  548.35   34.20
   1  -4  13  595.94   43.00
  -1   4 -13  599.24   56.09
  -1   4 -13  568.84   42.50
  -1   4 -13  613.34   44.40
   1  -5  13  469.55   38.40
   1  -5  13  504.55   38.60
   1  -5  13  413.26   60.69
   1  -5  13  468.15   37.30
   1  -5  13  471.95   65.59
  -1   5 -13  442.36   54.29
  -1   5 -13  560.34   41.20
  -1   5 -13  529.85   39.40
   1  -6  13  105.69   15.70
   1  -6  13   92.49   13.30
   1  -6  13  100.29   30.10
   1  -6  13   92.99   14.80
   1  -6  13   94.29   28.90
  -1   6 -13  118.09   17.90
  -1   6 -13  116.89   16.80
  -1   6 -13  102.19   24.40
   1  -7  13   27.70    5.40
   1  -7  13   18.80    7.90
   1  -7  13   15.10   15.60
   1  -7  13   11.90    6.90
   1  -7  13    4.00   14.80
  -1   7 -13   11.50    8.00
  -1   7 -13    8.60   12.70
   1  -8  13  501.75   33.50
   1  -8  13  392.86   51.79
   1  -8  13  410.76   54.19
  -1   8 -13  324.07   32.50
  -1   8 -13  345.67   47.10
   1  -9  13  485.05   33.70
   1  -9  13  307.17   47.70
   1  -9  13  463.15   53.99
[truncated: 5,203,339 more chars]
