# Supplementary material
Source: MDPI journal article supplement (https://www.mdpi.com/2073-4352/11/2/179)
Supplement: s1 [file s1 › SUPPLEMENTARY MATERIAL-REVISED.docx]

**SUPPLEMENTARY MATERIAL**

**Structural Characterization, Magnetic and Luminescent Properties of Praseodymium(III)-4,4,4-trifluoro-1-(2-naphthyl)butane-1,3-dionato(1-) Complexes**

**Franz A. Mautner 1,*, Florian Bierbaumer 1, Roland C. Fischer 2, Ramon Vicente 3, Ànnia Tubau 3, Arnau Ferran 3 and Salah S. Massoud 4,5,***

1 Institut für Physikalische and Theoretische Chemie, Technische Universität Graz, Stremayrgasse 9/II, A-8010 Graz, Austria

2 Institut für Anorganische Chemie, Technische Universität Graz, Stremayrgasse 9/V, A-8010 Graz, Austria

3 Departament de Química Inorgànica i Orgànica, Universitat de Barcelona, Martí i Franquès 1-11, E-31321 Barcelona, Spain

4 Department of Chemistry, University of Louisiana at Lafayette, P.O. Box 43700, Lafayette, LA 70504, USA

5 Department of Chemistry, Faculty of Science, Alexandria University, Moharem Bey 21511, Alexandria Egypt

**Content:**

Figures S1-S4: Observed and simulated X-ray powder pattern of **1**-**4**, respectively

Figures S5-S8: Packing plots of **1**-**4**, respectively

Tables S1-S4: Non-coordinative interactions in **1**-**4**, respectively


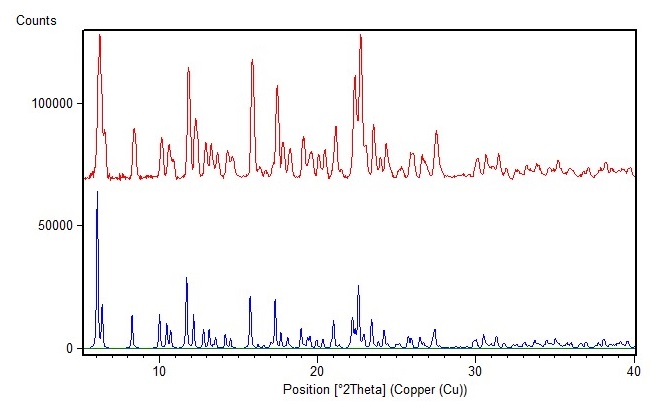


Figure S1: Observed (red) and simulated (blue) X-ray powder pattern of **1**.


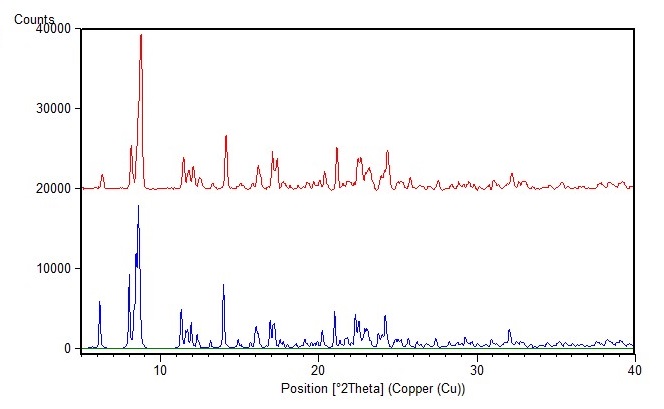


Figure S2: Observed (red) and simulated (blue) X-ray powder pattern of **2**.


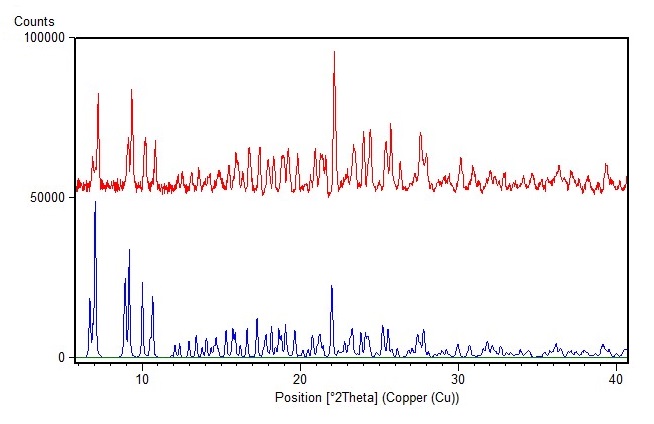


Figure S3: Observed (red) and simulated (blue) X-ray powder pattern of **3**.


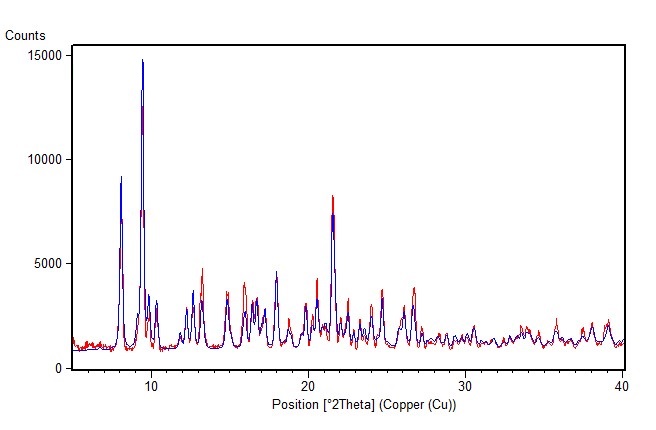


Figure S4: Observed (red) and simulated (blue) X-ray powder pattern of **4**.


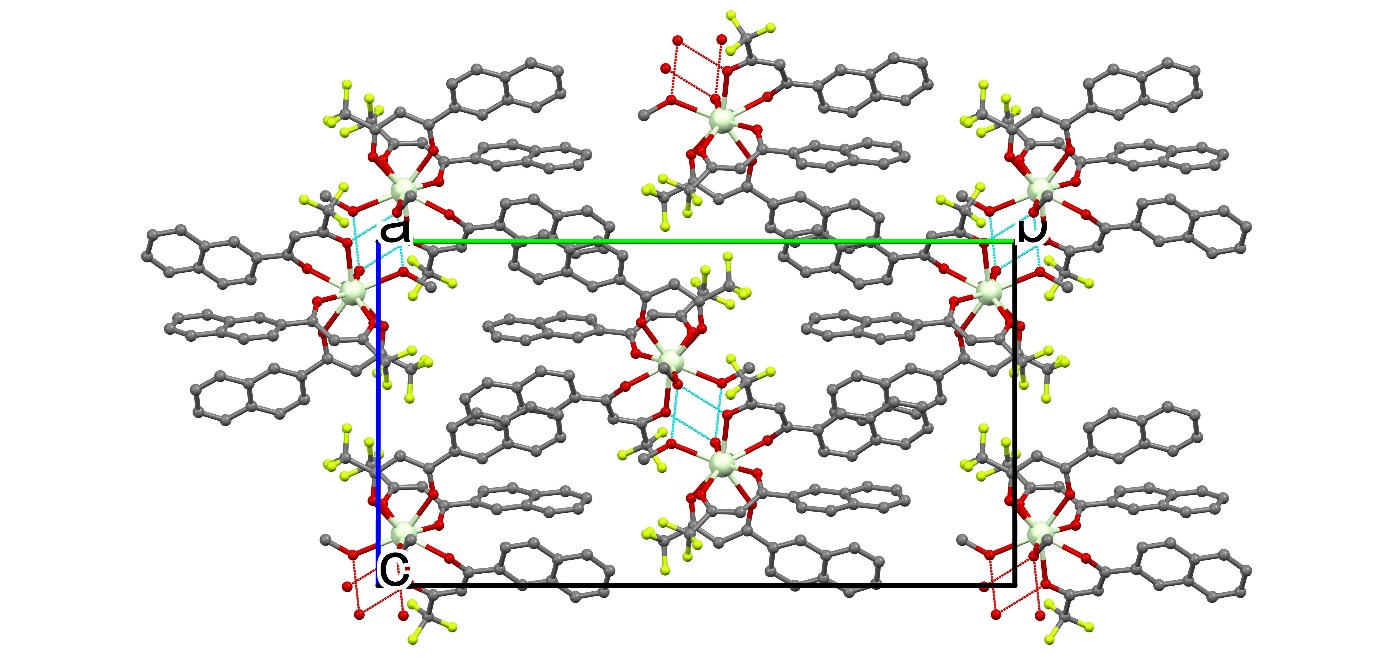


Figure S5: Packing view of **1**.


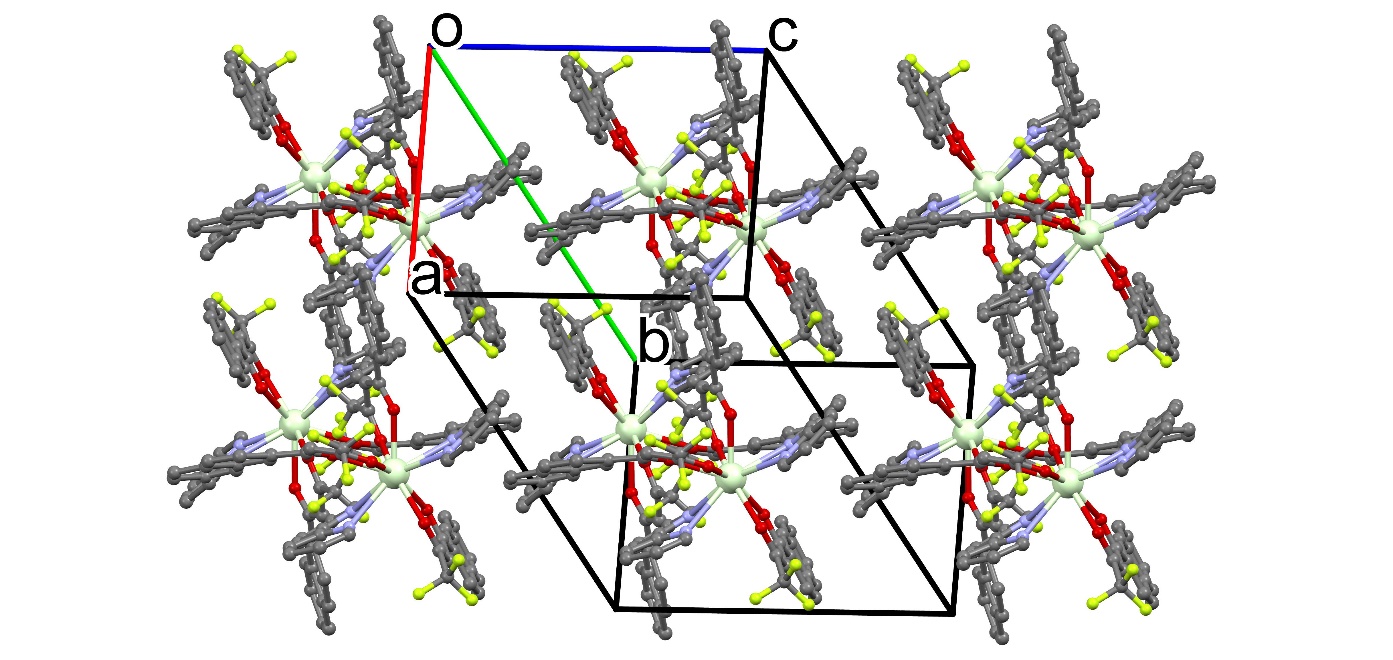


Figure S6: Packing view of **2**.


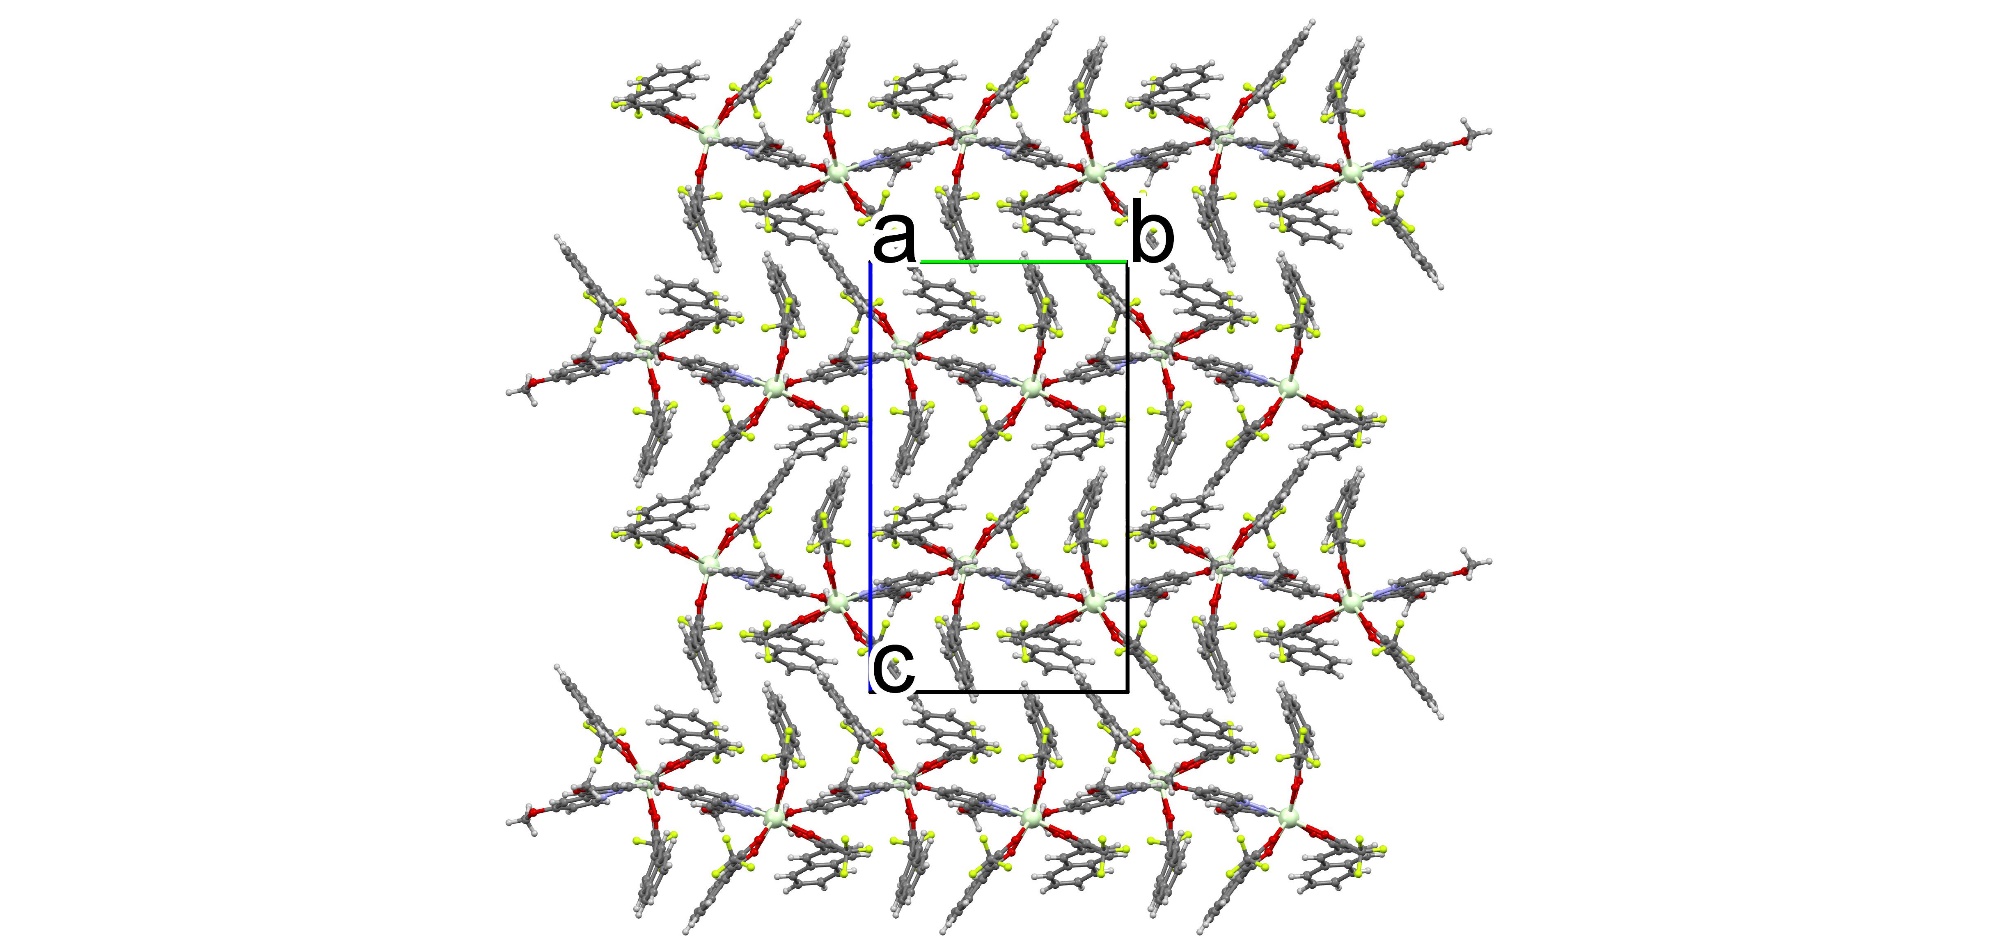


Figure S7: Packing view of **3**.


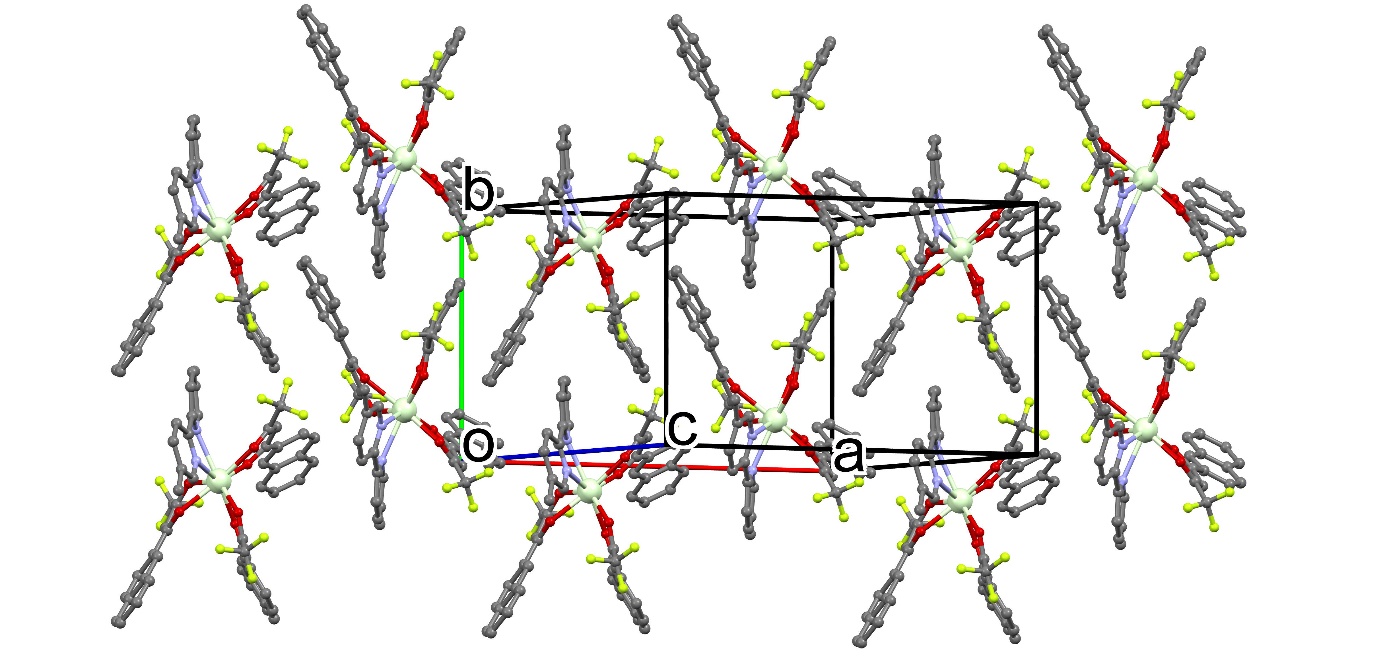


Figure S8: Packing view of **4**.

**Table S1**: Non-coordinative interactions in **1**.

| 6-Membered Ring (1) C5 --> C6 --> C7 --> C12 --> C13 --> C14 -->  6-Membered Ring (2) C7 --> C8 --> C9 --> C10 --> C11 --> C12 -->  6-Membered Ring (3) C19 --> C20 --> C21 --> C26 --> C27 --> C28 -->  6-Membered Ring (4) C21 --> C22 --> C23 --> C24 --> C25 --> C26 -->  6-Membered Ring (5) C33 --> C34 --> C35 --> C40 --> C41 --> C42 -->  6-Membered Ring (6) C35 --> C36 --> C37 --> C38 --> C39 --> C40 -->  10-Membered Ring (7) C5 --> C6 --> C7 --> C8 --> C9 --> C10 --> C11  --> C12 --> C13 --> C14 -->  10-Membered Ring (8) C19 --> C20 --> C21 --> C22 --> C23 --> C24 --> C25 --> C26 -->C27 --> C28 -->  10-Membered Ring (9) C33 --> C34 --> C35 --> C36 --> C37 --> C38 --> C39 --> C40 -->C41 --> C42 -->  **Analysis of Short Ring-Interactions with Cg-Cg Distances < 6.0 Ang., Alpha < 20.000 Deg. and Beta < 60.0 Deg.**  - Cg(I) = Plane number I (= ring number in () above)  - Alpha = Dihedral Angle between Planes I and J (Deg)  - Beta = Angle Cg(I)-->Cg(J) or Cg(I)-->Me vector and normal to plane I (Deg)  - Gamma = Angle Cg(I)-->Cg(J) vector and normal to plane J (Deg)  - Cg-Cg = Distance between ring Centroids (Ang.)  - CgI_Perp = Perpendicular distance of Cg(I) on ring J (Ang.)  - CgJ_Perp = Perpendicular distance of Cg(J) on ring I (Ang.)  - Slippage = Distance between Cg(I) and Perpendicular Projection of Cg(J) on Ring I (Ang).  - P,Q,R,S = J-Plane Parameters for Carth. Coord. (Xo, Yo, Zo) | | | | | | | | | | | | | | | | | | | | | | | | | | | |
| --- | --- | --- | --- | --- | --- | --- | --- | --- | --- | --- | --- | --- | --- | --- | --- | --- | --- | --- | --- | --- | --- | --- | --- | --- | --- | --- | --- |
|  | | | | | | | | | | | | | | | | | | | | | | | | | | | |
| **Cg(I)** | **Cg(J)** | | | | | **[ARU(J)]** | | **Cg-Cg** | | | | | **Alpha** | | | **Beta** | | | | **Gamma** | | **CgI_Perp** | | **CgJ_Perp** | | **Slippage** | | |
| Cg1 | Cg3 | | | | | [1655] | | 4,6565(17) | | | | | 12,766 | | | 68,56(14) | | | | 8,5 | | 71,4 | | 1,4875(12) | | 4,6050(12) | | |
| Cg1 | Cg5 | | | | | [4565] | | 4,8779(18) | | | | | -8,6234 | | | 2,88(14) | | | | 45,5 | | 47,2 | | 3,3111(12) | | 3,4209(13) | | |
| Cg1 | Cg6 | | | | | [4565] | | 3,7440(19) | | | | | -8,9165 | | | 2,61(15) | | | | 24,5 | | 26,8 | | 3,3425(12) | | 3,4072(13) | | |
| Cg1 | Cg6 | | | | | [4665] | | 5,7622(19) | | | | | -2,5831 | | | 2,61(15) | | | | 56,2 | | 58,7 | | 2,9909(12) | | 3,2064(13) | | |
| Cg1 | Cg8 | | | | | [1655] | | 5,3387(16) | | | | | 12,754 | | | 68,39(12) | | | | 20,1 | | 73,7 | | 1,4998(12) | | 5,0135(10) | | |
| Cg1 | Cg9 | | | | | [4565] | | 4,1748(16) | | | | | -8,7818 | | | 2,73(12) | | | | 35,1 | | 36,9 | | 3,3364(12) | | 3,4155(10) | | |
| Cg2 | Cg3 | | | | | [1655] | | 4,8964(18) | | | | | 12,766 | | | 66,70(14) | | | | 19,4 | | 69,8 | | 1,6887(13) | | 4,6188(12) | | |
| Cg2 | Cg4 | | | | | [1655] | | 5,4137(19) | | | | | 12,804 | | | 66,39(15) | | | | 8,9 | | 71,6 | | 1,7094(13) | | 5,3488(13) | | |
| Cg2 | Cg5 | | | | | [4565] | | 3,7137(19) | | | | | -8,6234 | | | 3,21(15) | | | | 21,3 | | 24 | | 3,3935(13) | | 3,4595(13) | | |
| Cg2 | Cg5 | | | | | [4665] | | 5,9419(19) | | | | | -2,3043 | | | 3,21(15) | | | | 59,9 | | 60,5 | | 2,9256(13) | | 2,9770(13) | | |
| Cg2 | Cg6 | | | | | [4565] | | 3,9832(19) | | | | | -8,9165 | | | 2,46(15) | | | | 32,7 | | 31,6 | | 3,3922(13) | | 3,3512(13) | | |
| Cg2 | Cg6 | | | | | [4665] | | 5,948(2) | | | | | -2,5831 | | | 2,46(15) | | | | 58,8 | | 60,4 | | 2,9412(13) | | 3,0852(13) | | |
| Cg2 | Cg8 | | | | | [1655] | | 5,0153(17) | | | | | 12,754 | | | 66,53(12) | | | | 6,4 | | 70,2 | | 1,7007(13) | | 4,9841(10) | | |
| Cg2 | Cg9 | | | | | [4565] | | 3,6535(17) | | | | | -8,7818 | | | 2,83(13) | | | | 21,2 | | 21,4 | | 3,4024(13) | | 3,4068(10) | | |
| Cg2 | Cg9 | | | | | [4665] | | 5,8168(18) | | | | | -2,4559 | | | 2,83(13) | | | | 58,6 | | 59,8 | | 2,9235(13) | | 3,0296(10) | | |
| Cg3 | Cg2 | | | | | [4464] | | 5,1195(17) | | | | | -8,9207 | | | 67,00(14) | | | | 17,7 | | 65,3 | | 2,1363(12) | | 4,8767(13) | | |
| Cg3 | Cg5 | | | | | [1455] | | 5,5701(18) | | | | | -13,4981 | | | 66,50(14) | | | | 37,3 | | 76,5 | | 1,3040(12) | | 4,4315(12) | | |
| Cg3 | Cg5 | | | | | [4565] | | 5,6165(17) | | | | | -8,6234 | | | 65,97(14) | | | | 21,7 | | 73,5 | | 1,5958(12) | | 5,2193(12) | | |
| Cg3 | Cg6 | | | | | [4565] | | 4,7946(18) | | | | | -8,9165 | | | 65,99(15) | | | | 6,4 | | 70,4 | | 1,6053(12) | | 4,7646(13) | | |
| Cg3 | Cg7 | | | | | [4464] | | 5,7584(16) | | | | | -9,2359 | | | 68,04(12) | | | | 28,5 | | 69,3 | | 2,0363(12) | | 5,0590(10) | | |
| Cg3 | Cg9 | | | | | [4565] | | 5,0771(16) | | | | | -8,7818 | | | 65,97(12) | | | | 10,5 | | 71,5 | | 1,6106(12) | | 4,9921(10) | | |
| Cg4 | Cg1 | | | | | [4464] | | 5,4719(18) | | | | | -9,5666 | | | 68,66(14) | | | | 16,8 | | 73,2 | | 1,5795(13) | | 5,2389(12) | | |
| Cg4 | Cg2 | | | | | [1555] | | 5,9178(19) | | | | | -6,2667 | | | 66,39(15) | | | | 36 | | 79,4 | | 1,0877(13) | | 4,7888(13) | | |
| Cg4 | Cg2 | | | | | [4464] | | 4,9609(18) | | | | | -8,9207 | | | 66,68(15) | | | | 10,2 | | 69,3 | | 1,7522(13) | | 4,8818(13) | | |
| Cg4 | Cg5 | | | | | [4565] | | 5,2333(18) | | | | | -8,6234 | | | 65,67(14) | | | | 4,7 | | 62,1 | | 2,4460(13) | | 5,2156(12) | | |
| Cg4 | Cg6 | | | | | [4565] | | 5,4803(18) | | | | | -8,9165 | | | 65,69(15) | | | | 29,8 | | 63,7 | | 2,4249(13) | | 4,7552(13) | | |
| Cg4 | Cg7 | | | | | [4464] | | 5,0794(16) | | | | | -9,2359 | | | 67,71(12) | | | | 4,8 | | 70,6 | | 1,6883(13) | | 5,0618(10) | | |
| Cg4 | Cg9 | | | | | [4565] | | 5,2172(16) | | | | | -8,7818 | | | 65,67(12) | | | | 17,1 | | 62 | | 2,4454(13) | | 4,9855(10) | | |
| Cg5 | Cg1 | | | | | [4564] | | 4,8778(18) | | | | | -2,9531 | | | 2,88(14) | | | | 47,2 | | 45,5 | | 3,4208(13) | | 3,3111(12) | | |
| Cg5 | Cg2 | | | | | [4564] | | 3,7135(19) | | | | | -2,4843 | | | 3,21(15) | | | | 24 | | 21,3 | | 3,4593(13) | | 3,3935(13) | | |
| Cg5 | Cg3 | | | | | [1555] | | 5,3822(18) | | | | | 9,6408 | | | 66,50(14) | | | | 21,3 | | 76 | | 1,3064(12) | | 5,0151(12) | | |
| Cg5 | Cg4 | | | | | [1555] | | 4,8500(18) | | | | | 9,7246 | | | 66,17(14) | | | | 10,7 | | 74 | | 1,3385(12) | | 4,7662(13) | | |
| Cg5 | Cg7 | | | | | [4564] | | 4,1633(16) | | | | | -2,7051 | | | 2,74(12) | | | | 36,3 | | 33,6 | | 3,4661(13) | | 3,3566(10) | | |
| Cg5 | Cg8 | | | | | [1555] | | 4,9750(16) | | | | | 9,6536 | | | 66,33(12) | | | | 10,6 | | 74,6 | | 1,3225(12) | | 4,8903(10) | | |
| Cg6 | Cg1 | | | | | [4464] | | 5,7621(19) | | | | | -9,5666 | | | 2,61(15) | | | | 58,7 | | 56,2 | | 3,2065(13) | | 2,9908(12) | | |
| Cg6 | Cg1 | | | | | [4564] | | 3,7440(19) | | | | | -2,9531 | | | 2,61(15) | | | | 26,8 | | 24,5 | | 3,4071(13) | | 3,3426(12) | | |
| Cg6 | Cg2 | | | | | [4564] | | 3,9830(19) | | | | | -2,4843 | | | 2,46(15) | | | | 31,6 | | 32,7 | | 3,3511(13) | | 3,3922(13) | | |
| Cg6 | Cg4 | | | | | [1555] | | 5,0519(19) | | | | | 9,7246 | | | 66,13(15) | | | | 19,1 | | 67,3 | | 1,9465(13) | | 4,7727(13) | | |
| Cg6 | Cg7 | | | | | [4464] | | 5,7247(18) | | | | | -9,2359 | | | 2,16(13) | | | | 58,8 | | 56,9 | | 3,1234(13) | | 2,9617(10) | | |
| Cg6 | Cg7 | | | | | [4564] | | 3,6719(17) | | | | | -2,7051 | | | 2,16(13) | | | | 23,3 | | 21,9 | | 3,4074(13) | | 3,3717(10) | | |
| Cg6 | Cg8 | | | | | [1555] | | 5,6891(17) | | | | | 9,6536 | | | 66,30(12) | | | | 30,3 | | 70,1 | | 1,9360(13) | | 4,9131(10) | | |
| Cg7 | Cg3 | | | | | [1655] | | 4,6153(16) | | | | | 12,766 | | | 67,67(12) | | | | 6,4 | | 69,9 | | 1,5867(10) | | 4,5867(12) | | |
| Cg7 | Cg4 | | | | | [1655] | | 5,6806(17) | | | | | 12,804 | | | 67,37(12) | | | | 19,3 | | 73,6 | | 1,6044(10) | | 5,3622(13) | | |
| Cg7 | Cg5 | | | | | [4565] | | 4,1634(16) | | | | | -8,6234 | | | 2,74(12) | | | | 33,6 | | 36,3 | | 3,3566(10) | | 3,4662(13) | | |
| Cg7 | Cg6 | | | | | [4565] | | 3,6719(17) | | | | | -8,9165 | | | 2,16(13) | | | | 21,9 | | 23,3 | | 3,3717(10) | | 3,4075(13) | | |
| Cg7 | Cg6 | | | | | [4665] | | 5,7247(18) | | | | | -2,5831 | | | 2,16(13) | | | | 56,9 | | 58,8 | | 2,9618(10) | | 3,1233(13) | | |
| Cg7 | Cg8 | | | | | [1655] | | 5,0295(14) | | | | | 12,754 | | | 67,50(9) | | | | 8,5 | | 71,5 | | 1,5988(10) | | 4,9748(10) | | |
| Cg7 | Cg9 | | | | | [4565] | | 3,7323(15) | | | | | -8,7818 | | | 2,44(9) | | | | 22,9 | | 25,3 | | 3,3737(10) | | 3,4383(10) | | |
| Cg7 | Cg9 | | | | | [4665] | | 5,8477(15) | | | | | -2,4559 | | | 2,44(9) | | | | 58,1 | | 59,7 | | 2,9522(10) | | 3,0925(10) | | |
| Cg8 | Cg1 | | | | | [4464] | | 5,9164(16) | | | | | -9,5666 | | | 68,83(12) | | | | 27,6 | | 72,9 | | 1,7367(10) | | 5,2415(12) | | |
| Cg8 | Cg2 | | | | | [4464] | | 4,8903(16) | | | | | -8,9207 | | | 66,83(12) | | | | 3,9 | | 66,6 | | 1,9439(10) | | 4,8789(13) | | |
| Cg8 | Cg5 | | | | | [1455] | | 5,6966(16) | | | | | -13,4981 | | | 66,33(12) | | | | 39,1 | | 75,5 | | 1,4288(10) | | 4,4228(12) | | |
| Cg8 | Cg5 | | | | | [4565] | | 5,2896(16) | | | | | -8,6234 | | | 65,80(12) | | | | 9,5 | | 67,5 | | 2,0212(10) | | 5,2171(12) | | |
| Cg8 | Cg6 | | | | | [4565] | | 5,0022(16) | | | | | -8,9165 | | | 65,82(12) | | | | 17,8 | | 66,2 | | 2,0153(10) | | 4,7628(13) | | |
| Cg8 | Cg7 | | | | | [4464] | | 5,2901(14) | | | | | -9,2359 | | | 67,87(9) | | | | 16,9 | | 69,4 | | 1,8620(10) | | 5,0617(10) | | |
| Cg8 | Cg9 | | | | | [1455] | | 5,9815(15) | | | | | -13,3644 | | | 66,31(9) | | | | 37,8 | | 76,1 | | 1,4336(10) | | 4,7294(10) | | |
| Cg8 | Cg9 | | | | | [4565] | | 5,0011(14) | | | | | -8,7818 | | | 65,80(9) | | | | 3,8 | | 66,1 | | 2,0282(10) | | 4,9901(10) | | |
| Cg9 | Cg1 | | | | | [4564] | | 4,1748(16) | | | | | -2,9531 | | | 2,73(12) | | | | 36,9 | | 35,1 | | 3,4154(10) | | 3,3365(12) | | |
| Cg9 | Cg2 | | | | | [4464] | | 5,8168(18) | | | | | -8,9207 | | | 2,83(13) | | | | 59,8 | | 58,6 | | 3,0297(10) | | 2,9236(13) | | |
| Cg9 | Cg2 | | | | | [4564] | | 3,6534(17) | | | | | -2,4843 | | | 2,83(13) | | | | 21,4 | | 21,2 | | 3,4068(10) | | 3,4023(13) | | |
| Cg9 | Cg3 | | | | | [1555] | | 5,8371(16) | | | | | 9,6408 | | | 66,47(12) | | | | 30,6 | | 74 | | 1,6125(10) | | 5,0254(12) | | |
| Cg9 | Cg4 | | | | | [1555] | | 4,7975(17) | | | | | 9,7246 | | | 66,14(12) | | | | 7,2 | | 70 | | 1,6423(10) | | 4,7600(13) | | |
| Cg9 | Cg7 | | | | | [4464] | | 5,8478(15) | | | | | -9,2359 | | | 2,44(9) | | | | 59,7 | | 58,1 | | 3,0926(10) | | 2,9522(10) | | |
| Cg9 | Cg7 | | | | | [4564] | | 3,7322(15) | | | | | -2,7051 | | | 2,44(9) | | | | 25,3 | | 22,9 | | 3,4382(10) | | 3,3737(10) | | |
| Cg9 | Cg8 | | | | | [1555] | | 5,2009(14) | | | | | 9,6536 | | | 66,31(9) | | | | 19,8 | | 71,7 | | 1,6290(10) | | 4,8923(10) | | |
|  | | | | | | | | | | | | | | | | | | | | | | | | | | | |
|  | | | | | | | | | | | | | | | | | | | | | | | | | | | |
| [1655] | | | 1+X,Y,Z | | | | | | | |
| [4565] | | | X,3/2-Y,1/2+Z | | | | | | | |
| [4665] | | | 1+X,3/2-Y,1/2+Z | | | | | | | |
| [4464] | | | -1+X,3/2-Y,-1/2+Z | | | | | | | |
| [1455] | | | -1+X,Y,Z | | | | | | | |
| [1555] | | | X,Y,Z | | | | | | | |
| [4564] | | | X,3/2-Y,-1/2+Z | | | | | | | |
|  | | | | | | | | | | | | | | | | | | | | | | | | | | | |
| **Analysis of X-H…Cg(Pi-Ring) Interactions (H..Cg < 3,0 Ang. - Gamma < 40,0 Deg)**  - Cg(J) = Center of gravity of ring J (Plane number above)  - H-Perp = Perpendicular distance of H to ring plane J  - Gamma = Angle between Cg-H vector and ring J normal  - X-H..Cg = X-H-Cg angle (degrees)  - X..Cg = Distance of X to Cg (Angstrom)  - X-H, Pi = Angle of the X-H bond with the Pi-plane (i,e,' Perpendicular = 90 degrees, Parallel = 0 degrees) | | | | | | | | | | | | | | | | | | | | | | | | | | | |
|  | | | | | | | | | | | | | | | | | | | | | | | | | | | |
|  | | | | | | | | | | | | | | | | | | | | | | | | | | | |
| **X--H(I)** | | | | **Cg(J)** | | | **[ARU(J)]** | | | | | **H..Cg** | | | **H-Perp** | | | | **Gamma** | | **X-H..Cg** | | **X..Cg** | | **X-H,Pi** | |
| C11-H11 | | | | Cg4 | | | [4665] | | | | | 2,88 | | | -2,74 | | 18,11 | | | | 143 | | 3,687(3) | | 66 | |
| C11-H11 | | | | Cg8 | | | [4665] | | | | | 2,96 | | | -2,74 | | 22,56 | | | | 134 | | 3,686(3) | | 66 | |
| C22-H22 | | | | Cg5 | | | [1555] | | | | | 2,67 | | | -2,63 | | 10,77 | | | | 150 | | 3,527(4) | | 65 | |
| C22-H22 | | | | Cg9 | | | [1555] | | | | | 2,8 | | | -2,62 | | 20,74 | | | | 137 | | 3,558(3) | | 65 | |
| C27-H27 | | | | Cg2 | | | [1455] | | | | | 2,84 | | | 2,59 | | 24,14 | | | | 142 | | 3,632(4) | | 60 | |
| C27-H27 | | | | Cg7 | | | [1455] | | | | | 2,66 | | | 2,56 | | 16,34 | | | | 134 | | 3,396(3) | | 60 | |
| C36-H36 | | | | Cg3 | | | [4564] | | | | | 2,72 | | | 2,66 | | 12,18 | | | | 142 | | 3,516(3) | | 64 | |
|  | | | | | | | | | | | | | | | | | | | | | | | | | | | |
|  | | | | | | | | | | | | | | | | | | | | | | | | | | | |
| [4665] | | 1+X,3/2-Y,1/2+Z | | | | | | | |
| [1555] | | X,Y,Z | | | | | | | |
| [1455] | | -1+X,Y,Z | | | | | | | |
| [4564] | | X,3/2-Y,-1/2+Z | | | | | | | |
|  | | | | | | | | | | | | | | | | | | | | | | | | | | | |
| The Cg(I) refer to the Ring Centre-of-Gravity numbers given in () in the Ring-Analysis above. | | | | | | | | | | | | | | | | | | | | | | | | | | | |
|  | | | | | | | | | | | | | | | | | | | | | | | | | | | |
| Cg(I) | | | | | x | | | | y | | | | | z | | | |
| **Cg1** | | | | | **0,84172(14)** | | | | **0,65959(4)** | | | | | **0,93522(8)** | | | |
| Cg2 | | | | | 0,84933(15) | | | | 0,74321(5) | | | | | 0,95488(8) | | | |
| Cg3 | | | | | 0,14343(13) | | | | 0,69915(4) | | | | | 0,75265(7) | | | |
| Cg4 | | | | | 0,20952(15) | | | | 0,78051(4) | | | | | 0,74321(8) | | | |
| Cg5 | | | | | 0,53678(14) | | | | 0,73608(4) | | | | | 0,56187(8) | | | |
| Cg6 | | | | | 0,50762(15) | | | | 0,81837(4) | | | | | 0,52810(8) | | | |
| Cg7 | | | | | 0,84580(11) | | | | 0,70142(3) | | | | | 0,94487(6) | | | |
| Cg8 | | | | | 0,17646(11) | | | | 0,73982(3) | | | | | 0,74790(6) | | | |
| Cg9 | | | | | 0,52206(11) | | | | 0,77720(3) | | | | | 0,54503(6) | | | |
|  | | | | | | | | | | | | | | | | | | | | | | | | | | | |

**Table S2**: Non-coordinative interactions in **2**.

| 6-Membered Ring (1) N1 --> C43 --> C44 --> C45 --> C46 --> C47 -->  6-Membered Ring (2) N2 --> C48 --> C49 --> C50 --> C51 --> C52 -->  6-Membered Ring (3) N3 --> C53 --> C54 --> C55 --> C56 --> C57 -->  6-Membered Ring (4) N4 --> C018 --> C01R --> C01Y --> C59 --> C58 -->  6-Membered Ring (5) C5 --> C6 --> C7 --> C12 --> C13 --> C14 -->  6-Membered Ring (6) C7 --> C8 --> C9 --> C10 --> C11 --> C12 -->  6-Membered Ring (7) C19 --> C20 --> C21 --> C26 --> C27 --> C28 -->  6-Membered Ring (8) C21 --> C22 --> C23 --> C24 --> C25 --> C26 -->  6-Membered Ring (9) C33 --> C34 --> C35 --> C40 --> C41 --> C42 -->  6-Membered Ring (10) C35 --> C36 --> C37 --> C38 --> C39 --> C40 -->  Analysis of Short Ring-Interactions with Cg-Cg Distances < 6.0 Ang., Alpha < 20.000 Deg. and Beta < 60.0 Deg.  - Cg(I) = Plane number I (= ring number in () above)  - Alpha = Dihedral Angle between Planes I and J (Deg)  - Beta = Angle Cg(I)-->Cg(J) or Cg(I)-->Me vector and normal to plane I (Deg)  - Gamma = Angle Cg(I)-->Cg(J) vector and normal to plane J (Deg)  - Cg-Cg = Distance between ring Centroids (Ang.)  - CgI_Perp = Perpendicular distance of Cg(I) on ring J (Ang.)  - CgJ_Perp = Perpendicular distance of Cg(J) on ring I (Ang.) |
| --- |
|  |
|  |

| Cg(I) | Cg(J) | [ARU(J)] | Cg-Cg | Alpha | Beta | Gamma | CgI_Perp | CgJ_Perp | Slippage |
| --- | --- | --- | --- | --- | --- | --- | --- | --- | --- |
| Cg1 | Cg1 | [2765] | 4,2094(14) | -11,8747 | 0,02(11) | 32,3 | 32,3 | 3,5565(9) | 3,5565(9) |
| Cg1 | Cg2 | [2765] | 4,0434(13) | -10,7592 | 5,97(11) | 32,8 | 27 | 3,6036(9) | 3,3972(10) |
| Cg1 | Cg10 | [2775] | 5,5106(14) | 1,4586 | 66,56(11) | 31,3 | 87,9 | 0,1975(9) | 4,7079(10) |
| Cg2 | Cg1 | [2765] | 4,0435(13) | -11,8747 | 5,97(11) | 27 | 32,8 | 3,3973(10) | 3,6036(9) |
| Cg2 | Cg9 | [1555] | 5,7709(14) | 2,4033 | 61,25(11) | 14,6 | 65,4 | 2,4031(9) | 5,5855(9) |
| Cg3 | Cg3 | [2666] | 3,7469(14) | -12,5141 | 0,00(11) | 26,4 | 26,4 | 3,3574(9) | 3,3575(9) |
| Cg3 | Cg4 | [2666] | 4,5881(12) | -10,3272 | 13,96(11) | 46,7 | 37,2 | 3,6550(9) | 3,1493(9) |
| Cg3 | Cg5 | [1555] | 5,5954(12) | 0,2666 | 86,21(11) | 46,2 | 47,3 | 3,7931(9) | 3,8738(9) |
| Cg3 | Cg7 | [1555] | 4,6603(12) | 16,9042 | 26,07(11) | 32,3 | 56,2 | 2,5944(10) | 3,9371(9) |
| Cg3 | Cg8 | [1555] | 5,0779(13) | 17,3815 | 25,07(12) | 35,1 | 58,4 | 2,6625(10) | 4,1535(10) |
| Cg4 | Cg3 | [2666] | 4,5883(12) | -12,5141 | 13,96(11) | 37,2 | 46,7 | 3,1494(9) | 3,6551(9) |
| Cg4 | Cg6 | [1465] | 5,8108(13) | 5,6443 | 81,46(12) | 47,9 | 74,7 | 1,5311(9) | 3,8930(10) |
| Cg4 | Cg7 | [1555] | 4,8348(14) | 16,9042 | 20,55(11) | 43,5 | 41,9 | 3,6011(10) | 3,5088(9) |
| Cg5 | Cg2 | [2765] | 5,1123(14) | -10,7592 | 73,53(11) | 18,6 | 87,9 | 0,1882(9) | 4,8455(9) |
| Cg5 | Cg3 | [1555] | 5,5954(12) | 15,8715 | 86,21(11) | 47,3 | 46,2 | 3,8739(9) | 3,7930(9) |
| Cg5 | Cg3 | [2666] | 5,7041(13) | -12,5141 | 86,21(11) | 31,6 | 84,8 | 0,5164(9) | 4,8575(9) |
| Cg5 | Cg4 | [2666] | 4,9005(13) | -10,3272 | 81,45(11) | 15 | 84,9 | 0,4338(9) | 4,7337(9) |
| Cg5 | Cg7 | [2666] | 4,9225(15) | -7,9924 | 70,16(11) | 49,7 | 20,6 | 4,6079(10) | 3,1809(9) |
| Cg5 | Cg10 | [1545] | 5,8286(14) | -2,6282 | 15,42(11) | 55,8 | 56,2 | 3,2400(9) | 3,2774(10) |
| Cg6 | Cg2 | [2765] | 5,6475(14) | -10,7592 | 73,52(12) | 31,3 | 88,5 | 0,1499(10) | 4,8272(9) |
| Cg6 | Cg4 | [2666] | 4,8709(14) | -10,3272 | 81,46(12) | 13,8 | 84,6 | 0,4585(10) | 4,7314(9) |
| Cg6 | Cg6 | [2756] | 5,6977(14) | -3,2851 | 0,00(12) | 55,8 | 55,8 | 3,2002(11) | 3,2002(11) |
| Cg6 | Cg8 | [2766] | 5,2573(16) | -18,5012 | 71,83(12) | 59,6 | 24,3 | 4,7905(11) | 2,6628(9) |
| Cg7 | Cg3 | [1555] | 4,6602(12) | 15,8715 | 26,07(11) | 56,2 | 32,3 | 3,9370(9) | 2,5942(10) |
| Cg7 | Cg4 | [1555] | 4,8347(14) | 14,2224 | 20,55(11) | 41,9 | 43,5 | 3,5088(9) | 3,6011(10) |
| Cg7 | Cg5 | [2666] | 4,9225(15) | -8,917 | 70,16(11) | 20,6 | 49,7 | 3,1810(9) | 4,6079(10) |
| Cg7 | Cg7 | [2676] | 4,0522(12) | -20,1708 | 0,00(12) | 36,3 | 36,3 | 3,2666(10) | 3,2666(10) |
| Cg7 | Cg8 | [2676] | 5,6523(13) | -20,4783 | 2,48(12) | 54 | 56,2 | 3,1471(10) | 3,3197(10) |
| Cg8 | Cg3 | [1555] | 5,0779(13) | 15,8715 | 25,07(12) | 58,4 | 35,1 | 4,1535(10) | 2,6624(10) |
| Cg8 | Cg5 | [2666] | 5,0056(15) | -8,917 | 72,13(11) | 23,2 | 70,5 | 1,6711(9) | 4,6006(10) |
| Cg8 | Cg6 | [2766] | 5,2573(16) | -4,4399 | 71,83(12) | 24,3 | 59,6 | 2,6628(9) | 4,7905(11) |
| Cg8 | Cg7 | [2676] | 5,6523(13) | -20,1708 | 2,48(12) | 56,2 | 54 | 3,3197(10) | 3,1471(10) |
| Cg9 | Cg5 | [1565] | 5,4025(13) | 1,3676 | 16,50(11) | 52,3 | 60,6 | 2,6524(9) | 3,3034(9) |
| Cg9 | Cg7 | [2676] | 5,9229(13) | -20,1708 | 79,53(11) | 10,2 | 79,5 | 1,0843(10) | 5,8300(9) |
| Cg9 | Cg8 | [2676] | 4,8935(14) | -20,4783 | 81,07(11) | 13,7 | 78,9 | 0,9448(10) | 4,7537(9) |
| Cg9 | Cg9 | [2775] | 3,8408(13) | 0,9992 | 0,00(11) | 27,6 | 27,6 | 3,4024(9) | 3,4025(9) |
| Cg9 | Cg10 | [2775] | 3,7138(14) | 1,4586 | 1,25(11) | 22,9 | 22,7 | 3,4255(9) | 3,4222(10) |
| Cg10 | Cg5 | [1565] | 5,8287(14) | 1,3676 | 15,42(11) | 56,2 | 55,8 | 3,2773(10) | 3,2400(9) |
| Cg10 | Cg8 | [2676] | 4,9497(14) | -20,4783 | 79,95(12) | 15,9 | 73 | 1,4504(11) | 4,7592(9) |
| Cg10 | Cg9 | [2775] | 3,7138(14) | 0,9992 | 1,25(11) | 22,7 | 22,9 | 3,4222(10) | 3,4256(9) |
| Cg10 | Cg10 | [2775] | 4,9811(14) | 1,4586 | 0,00(11) | 46,8 | 46,8 | 3,4120(10) | 3,4120(10) |

|  |
| --- |
| | [2765] | 2-X,1-Y,-Z | | --- | --- | | [2775] | 2-X,2-Y,-Z | | [1555] | X,Y,Z | | [2666] | 1-X,1-Y,1-Z | | [1465] | -1+X,1+Y,Z | | [1545] | X,-1+Y,Z | | [2756] | 2-X,-Y,1-Z | | [2766] | 2-X,1-Y,1-Z | | [2676] | 1-X,2-Y,1-Z | | [1565] | X,1+Y,Z | |
|  |
| Analysis of X-H...Cg(Pi-Ring) Interactions (H..Cg < 3.0 Ang. - Gamma < 40.0 Deg)  - Cg(J) = Center of gravity of ring J (Plane number above)  - H-Perp = Perpendicular distance of H to ring plane J  - Gamma = Angle between Cg-H vector and ring J normal  - X-H..Cg = X-H-Cg angle (degrees)  - X..Cg = Distance of X to Cg (Angstrom)  - X-H, Pi = Angle of the X-H bond with the Pi-plane (i.e.' Perpendicular = 90 degrees, Parallel = 0 degrees) |
|  |
| | X--H(I) | Cg(J) | [ARU(J)] | H..Cg | H-Perp | Gamma | X-H..Cg | X..Cg | X-H,Pi | | --- | --- | --- | --- | --- | --- | --- | --- | --- | | C01Y-H01Y | Cg6 | [2666] | 2,74 | 2,73 | 2,06 | 147 | 3,568(3) | 58 | | C24-H24 | Cg10 | [2676] | 2,97 | 2,81 | 18,76 | 137 | 3,723(3) | 56 | | C25-H25 | Cg9 | [2676] | 2,73 | 2,67 | 12,08 | 149 | 3,574(3) | 62 | | C59-H59 | Cg5 | [2666] | 2,73 | 2,72 | 2,41 | 151 | 3,587(3) | 59 | |
|  |
| | [2666] | 1-X,1-Y,1-Z | | --- | --- | | [2676] | 1-X,2-Y,1-Z | |
|  |
| Analysis of Y-X...Cg(Pi-Ring) Interactions (X..Cg < 4.0 Ang. - Gamma < 30.0 Deg) |
|  |
| | Y--X(I) | Cg(J) | [ARU(J)] | X,,Cg | X-Perp | Gamma | Y-X..Cg | Y..Cg | Y-X,Pi | | --- | --- | --- | --- | --- | --- | --- | --- | --- | | C15-F5 | Cg6 | [1465] | 3,6215(19) | -3,402 | 20,04 | 128,50(14) | 4,577(3) | 33,09 | |
|  |
| | [1465] | -1+X,1+Y,Z | | --- | --- | |
|  |
| The Cg(I) refer to the Ring Centre-of-Gravity numbers given in () in the Ring-Analysis above. |
| | Cg(I) | x | y | z | | --- | --- | --- | --- | | Cg1 | 1,06810(8) | 0,54951(6) | 0,07755(6) | | Cg2 | 0,77540(9) | 0,72594(6) | -0,02753(6) | | Cg3 | 0,61380(8) | 0,56093(6) | 0,49075(5) | | Cg4 | 0,32434(8) | 0,74041(6) | 0,38482(6) | | Cg5 | 0,88382(8) | 0,23811(6) | 0,30555(6) | | Cg6 | 1,05075(8) | 0,14458(6) | 0,37327(7) | | Cg7 | 0,47478(8) | 0,87567(6) | 0,55048(6) | | Cg8 | 0,50957(8) | 0,81197(6) | 0,69047(6) | | Cg9 | 0,87840(8) | 0,99592(6) | 0,11043(6) | | Cg10 | 0,79418(8) | 1,13346(6) | 0,01846(6) | |
|  |
|  |

**Table S3**: Non-coordinative interactions in **3**.

| 6-Membered Ring (1) N1 --> C43 --> C44 --> C45 --> C46 --> C47 -->  6-Membered Ring (2) N2 --> C48 --> C49 --> C50 --> C51 --> C52 -->  6-Membered Ring (3) C5 --> C6 --> C7 --> C12 --> C13 --> C14 -->  6-Membered Ring (4) C7 --> C8 --> C9 --> C10 --> C11 --> C12 -->  6-Membered Ring (5) C19 --> C20 --> C21 --> C26 --> C27 --> C28 -->  6-Membered Ring (6) C21 --> C22 --> C23 --> C24 --> C25 --> C26 -->  6-Membered Ring (7) C33 --> C34 --> C35 --> C40 --> C41 --> C42 -->  6-Membered Ring (8) C35 --> C36 --> C37 --> C38 --> C39 --> C40 -->  10-Membered Ring (9) C5 --> C6 --> C7 --> C8 --> C9 --> C10 --> C11 --> C12 ->  10-Membered Ring (10) C19 --> C20 --> C21 --> C22 --> C23 --> C24 --> C25 --> C26 -->  10-Membered Ring (11) C33 --> C34 --> C35 --> C36 --> C37 --> C38 --> C39 --> C40 -->  **Analysis of Short Ring-Interactions with Cg-Cg Distances < 6.0 Ang., Alpha < 20.000 Deg. and Beta < 60.0 Deg.**  - Cg(I) = Plane number I (= ring number in () above)  - Alpha = Dihedral Angle between Planes I and J (Deg)  - Beta = Angle Cg(I)-->Cg(J) or Cg(I)-->Me vector and normal to plane I (Deg)  - Gamma = Angle Cg(I)-->Cg(J) vector and normal to plane J (Deg)  - Cg-Cg = Distance between ring Centroids (Ang.)  - CgI_Perp = Perpendicular distance of Cg(I) on ring J (Ang.)  - CgJ_Perp = Perpendicular distance of Cg(J) on ring I (Ang.) | | | |
| --- | --- | --- | --- |
|  | | | |
| | Cg(I) | Cg(J) | [ARU(J)] | Cg-Cg | Alpha | Beta | Gamma | CgI_Perp | CgJ_Perp | Slippage | | --- | --- | --- | --- | --- | --- | --- | --- | --- | --- | | Cg1 | Cg4 | [2645] | 5,5841(10) | 6,9357 | 79,26(8) | 29 | 83,1 | 0,6707(6) | 4,8828(8) | | Cg1 | Cg5 | [2645] | 3,6792(9) | -0,6076 | 8,61(8) | 27,3 | 20,1 | 3,4543(6) | 3,2700(7) | | Cg1 | Cg6 | [2645] | 4,2713(10) | -0,0918 | 12,45(8) | 30,3 | 38,5 | 3,3427(6) | 3,6894(8) | | Cg1 | Cg9 | [2645] | 5,8216(9) | 6,6814 | 80,44(7) | 39,1 | 81,9 | 0,8235(6) | 4,5181(6) | | Cg1 | Cg10 | [2645] | 3,8026(9) | -0,2842 | 10,48(6) | 23,5 | 24,5 | 3,4603(6) | 3,4881(6) | | Cg2 | Cg3 | [1555] | 5,3558(10) | 7,3939 | 63,21(8) | 23,8 | 39,4 | 4,1357(6) | 4,8993(7) | | Cg2 | Cg3 | [2645] | 5,8769(10) | 6,3743 | 76,28(8) | 46,1 | 57,9 | 3,1249(6) | 4,0757(7) | | Cg2 | Cg5 | [2645] | 4,7431(9) | -0,6076 | 14,19(8) | 43,3 | 55,6 | 2,6792(6) | 3,4503(7) | | Cg2 | Cg7 | [1555] | 4,9092(9) | 11,629 | 60,85(8) | 7,9 | 67,8 | 1,8582(6) | 4,8623(7) | | Cg2 | Cg8 | [1555] | 5,5491(10) | 11,3539 | 62,14(8) | 23,3 | 71,8 | 1,7334(6) | 5,0969(8) | | Cg2 | Cg9 | [1555] | 5,6737(9) | 7,1276 | 62,03(7) | 23,8 | 42,1 | 4,2114(6) | 5,1917(6) | | Cg2 | Cg10 | [2645] | 5,7774(9) | -0,2842 | 16,55(6) | 48,8 | 64,3 | 2,5070(6) | 3,8061(6) | | Cg2 | Cg11 | [1555] | 5,0957(9) | 11,5124 | 61,48(7) | 12,2 | 69,1 | 1,8157(6) | 4,9810(6) | | Cg3 | Cg2 | [1555] | 5,3557(10) | 5,3814 | 63,21(8) | 39,4 | 23,8 | 4,8992(7) | 4,1357(6) | | Cg3 | Cg2 | [2655] | 5,8769(10) | -6,7598 | 76,28(8) | 57,9 | 46,1 | 4,0756(7) | 3,1249(6) | | Cg3 | Cg5 | [2645] | 4,9823(10) | -0,6076 | 63,52(8) | 30,9 | 65,6 | 2,0568(7) | 4,2772(7) | | Cg3 | Cg7 | [2655] | 3,7706(10) | 9,7965 | 15,67(8) | 11,5 | 19 | 3,5662(7) | 3,6945(7) | | Cg3 | Cg8 | [2655] | 4,1382(11) | 10,1024 | 14,73(9) | 24,1 | 30,3 | 3,5711(7) | 3,7787(8) | | Cg3 | Cg10 | [2645] | 5,7369(9) | -0,2842 | 62,51(7) | 41 | 67,2 | 2,2198(7) | 4,3280(6) | | Cg3 | Cg11 | [2655] | 3,7684(9) | 9,9674 | 15,20(7) | 7,1 | 17,8 | 3,5871(7) | 3,7394(6) | | Cg4 | Cg7 | [2655] | 4,0485(10) | 9,7965 | 13,90(8) | 24,4 | 36,1 | 3,2730(8) | 3,6871(7) | | Cg4 | Cg8 | [2655] | 5,5354(11) | 10,1024 | 13,34(9) | 45,4 | 54,3 | 3,2332(8) | 3,8887(8) | | Cg4 | Cg11 | [2655] | 4,6951(10) | 9,9674 | 13,61(8) | 36,2 | 45,8 | 3,2712(8) | 3,7907(6) | | Cg5 | Cg1 | [2655] | 3,6792(9) | -6,9829 | 8,61(8) | 20,1 | 27,3 | 3,2701(7) | 3,4541(6) | | Cg5 | Cg2 | [2655] | 4,7432(9) | -6,7598 | 14,19(8) | 55,6 | 43,3 | 3,4504(7) | 2,6792(6) | | Cg5 | Cg3 | [4565] | 5,9594(10) | -17,0888 | 63,52(8) | 18,7 | 76,2 | 1,4244(7) | 5,6455(7) | | Cg5 | Cg4 | [4565] | 4,6020(10) | -17,594 | 61,95(8) | 11,8 | 70,5 | 1,5343(7) | 4,5041(8) | | Cg5 | Cg7 | [3666] | 5,9505(10) | -15,0624 | 48,06(8) | 49,5 | 82,7 | 0,7592(7) | 3,8678(7) | | Cg5 | Cg9 | [4565] | 5,1821(9) | -17,3246 | 62,77(7) | 11,7 | 73,7 | 1,4519(7) | 5,0742(6) | | | | | |
|  | | | |
| | Cg6 | Cg1 | [2655] | 4,2713(10) | -6,9829 | 12,45(8) | 38,5 | 30,3 | 3,6894(8) | 3,3426(6) | | --- | --- | --- | --- | --- | --- | --- | --- | --- | --- | | Cg6 | Cg4 | [4565] | 4,7791(11) | -17,594 | 60,27(9) | 19,5 | 71,7 | 1,5033(8) | 4,5051(8) | | Cg6 | Cg9 | [4565] | 5,7792(10) | -17,3246 | 60,93(8) | 27 | 75,1 | 1,4899(8) | 5,1483(6) | | Cg7 | Cg3 | [2645] | 3,7705(10) | 6,3743 | 15,67(8) | 19 | 11,5 | 3,6944(7) | 3,5662(7) | | Cg7 | Cg4 | [2645] | 4,0485(10) | 6,9357 | 13,90(8) | 36,1 | 24,4 | 3,6870(7) | 3,2731(8) | | Cg7 | Cg7 | [3666] | 3,6690(10) | -15,0624 | 0,00(8) | 20,6 | 20,6 | 3,4334(7) | 3,4334(7) | | Cg7 | Cg8 | [3666] | 5,0464(10) | -14,8823 | 1,84(8) | 47,6 | 46,1 | 3,4980(7) | 3,4024(8) | | Cg7 | Cg9 | [2645] | 3,7127(9) | 6,6814 | 14,75(7) | 23 | 8,8 | 3,6691(7) | 3,4166(6) | | Cg7 | Cg11 | [3666] | 4,2372(9) | -14,9572 | 0,91(7) | 36,3 | 35,5 | 3,4479(7) | 3,4150(6) | | Cg8 | Cg3 | [2645] | 4,1381(11) | 6,3743 | 14,73(9) | 30,3 | 24,1 | 3,7786(8) | 3,5710(7) | | Cg8 | Cg4 | [2645] | 5,5353(11) | 6,9357 | 13,34(9) | 54,3 | 45,4 | 3,8886(8) | 3,2332(8) | | Cg8 | Cg7 | [3666] | 5,0465(10) | -15,0624 | 1,84(8) | 46,1 | 47,6 | 3,4025(8) | 3,4979(7) | | Cg8 | Cg9 | [2645] | 4,7288(10) | 6,6814 | 13,99(8) | 44 | 36,2 | 3,8141(8) | 3,3991(6) | | Cg8 | Cg11 | [3666] | 5,9934(10) | -14,9572 | 0,93(7) | 54,1 | 54,9 | 3,4478(8) | 3,5103(6) | | Cg9 | Cg2 | [1555] | 5,6736(9) | 5,3814 | 62,03(7) | 42,1 | 23,8 | 5,1916(6) | 4,2114(6) | | Cg9 | Cg5 | [2645] | 5,6655(9) | -0,6076 | 62,77(7) | 42 | 62,4 | 2,6281(6) | 4,2086(7) | | Cg9 | Cg7 | [2655] | 3,7127(9) | 9,7965 | 14,75(7) | 8,8 | 23 | 3,4166(6) | 3,6692(7) | | Cg9 | Cg8 | [2655] | 4,7288(10) | 10,1024 | 13,99(8) | 36,2 | 44 | 3,3990(6) | 3,8141(8) | | Cg9 | Cg11 | [2655] | 4,0746(8) | 9,9674 | 14,36(5) | 23,2 | 32,8 | 3,4261(6) | 3,7445(6) | | Cg10 | Cg1 | [2655] | 3,8025(9) | -6,9829 | 10,48(6) | 24,5 | 23,5 | 3,4881(6) | 3,4601(6) | | Cg10 | Cg4 | [4565] | 4,5217(10) | -17,594 | 61,10(7) | 10,2 | 70,4 | 1,5144(6) | 4,4503(8) | | Cg10 | Cg9 | [4565] | 5,3435(8) | -17,3246 | 61,84(5) | 18,8 | 74,1 | 1,4666(6) | 5,0593(6) | | Cg11 | Cg3 | [2645] | 3,7684(9) | 6,3743 | 15,20(7) | 17,8 | 7,1 | 3,7393(6) | 3,5871(7) | | Cg11 | Cg4 | [2645] | 4,6952(10) | 6,9357 | 13,61(8) | 45,8 | 36,2 | 3,7907(6) | 3,2713(8) | | Cg11 | Cg7 | [3666] | 4,2372(9) | -15,0624 | 0,91(7) | 35,5 | 36,3 | 3,4150(6) | 3,4478(7) | | Cg11 | Cg8 | [3666] | 5,9934(10) | -14,8823 | 0,93(7) | 54,9 | 54,1 | 3,5103(6) | 3,4477(8) | | Cg11 | Cg9 | [2645] | 4,0747(8) | 6,6814 | 14,36(5) | 32,8 | 23,2 | 3,7444(6) | 3,4262(6) | | Cg11 | Cg11 | [3666] | 5,0426(8) | -14,9572 | 0,00(5) | 46,9 | 46,9 | 3,4449(6) | 3,4448(6) | | | | | |
|  | | | |
| [2645] | 1-X,-1/2+Y,1/2-Z |
| [1555] | X,Y,Z |
| [2655] | 1-X,1/2+Y,1/2-Z |
| [4565] | X,3/2-Y,1/2+Z |
| [3666] | 1-X,1-Y,1-Z |
|  | | | |
| **Analysis of X-H...Cg(Pi-Ring) Interactions (H..Cg < 3.0 Ang. - Gamma < 40.0 Deg)**  - Cg(J) = Center of gravity of ring J (Plane number above)  - H-Perp = Perpendicular distance of H to ring plane J  - Gamma = Angle between Cg-H vector and ring J normal  - X-H..Cg = X-H-Cg angle (degrees)  - X..Cg = Distance of X to Cg (Angstrom)  - X-H, Pi = Angle of the X-H bond with the Pi-plane (i.e.' Perpendicular = 90 degrees, Parallel = 0 degrees) | | | |
| | X--H(I) | Cg(J) | [ARU(J)] | H..Cg | H-Perp | Gamma | X-H..Cg | X,,Cg | X-H,Pi | | --- | --- | --- | --- | --- | --- | --- | --- | --- | | C10-H10 | Cg6 | [4564] | 2,7 | 2,64 | 11,64 | 143 | 3,500(2) | 52 | | C10-H10 | Cg10 | [4564] | 2,71 | 2,61 | 15,45 | 127 | 3,360(2) | 51 | | C11-H11 | Cg5 | [4564] | 2,81 | 2,74 | 12,77 | 126 | 3,4560(19) | 48 | | C34-H34 | Cg2 | [1555] | 2,88 | 2,82 | 11,27 | 140 | 3,6583(18) | 60 | | | | |
| | [4564] | X,3/2-Y,-1/2+Z | | --- | --- | | [1555] | X,Y,Z | | | | |
| **Analysis of Y-X...Cg(Pi-Ring) Interactions (X..Cg < 4.0 Ang. - Gamma < 30.0 Deg)** | | | |
| | Y--X(I) | Cg(J) | [ARU(J)] | X,,Cg | X-Perp | Gamma | Y-X,,Cg | Y,,Cg | Y-X,Pi | | --- | --- | --- | --- | --- | --- | --- | --- | --- | | C15-F4 | Cg4 | [2655] | 3,3512(18) | -3,174 | 18,74 | 143,71(16) | 4,484(2) | 60 | | | | |
|  | | | |
| | [2655] | 1-X,1/2+Y,1/2-Z | | --- | --- | | | | |
| The Cg(I) refer to the Ring Centre-of-Gravity numbers given in () in the Ring-Analysis above. | | | |
| | Cg(I) | x | y | z | | --- | --- | --- | --- | | Cg1 | 0,22981(5) | 0,36918(4) | 0,24366(3) | | Cg2 | 0,53098(5) | 0,47015(4) | 0,27274(3) | | Cg3 | 0,46382(6) | 0,65138(5) | 0,08307(3) | | Cg4 | 0,64135(6) | 0,66656(5) | 0,06749(3) | | Cg5 | 0,66645(5) | 0,84014(4) | 0,38459(3) | | Cg6 | 0,83779(5) | 0,78780(5) | 0,42337(3) | | Cg7 | 0,52980(5) | 0,39490(5) | 0,46545(3) | | Cg8 | 0,71484(5) | 0,36956(5) | 0,48069(3) | | Cg9 | 0,55253(5) | 0,65921(4) | 0,07527(2) | | Cg10 | 0,75200(4) | 0,81410(4) | 0,40430(2) | | Cg11 | 0,62235(4) | 0,38239(4) | 0,47314(2) | | | | |

**Table S4**: Non-coordinative interactions in **4**.

| 6-Membered Ring (1) N1 --> C43 --> C44 --> C45 --> C46 --> C47 -->  6-Membered Ring (2) N2 --> C49 --> C50 --> C51 --> C52 --> C53 -->  6-Membered Ring (3) C5 --> C6 --> C7 --> C12 --> C13 --> C14 -->  6-Membered Ring (4) C7 --> C8 --> C9 --> C10 --> C11 --> C12 -->  6-Membered Ring (5) C19 --> C20 --> C21 --> C26 --> C27 --> C28 -->  6-Membered Ring (6) C21 --> C22 --> C23 --> C24 --> C25 --> C26 -->  6-Membered Ring (7) C33 --> C34 --> C35 --> C40 --> C41 --> C42 -->  6-Membered Ring (8) C35 --> C36 --> C37 --> C38 --> C39 --> C40 -->  10-Membered Ring (9) C5 --> C6 --> C7 --> C8 --> C9 --> C10 --> C11  --> C12 --> C13 --> C14 -->  10-Membered Ring (10) C19 --> C20 --> C21 --> C22 --> C23 --> C24 --> C25 --> C26 -->C27 --> C28 -->  10-Membered Ring (11) C33 --> C34 --> C35 --> C36 --> C37 --> C38 --> C39 --> C40 -->C41 --> C42 -->  **Analysis of Short Ring-Interactions with Cg-Cg Distances < 6.0 Ang., Alpha < 20.000 Deg. and Beta < 60.0 Deg.**  - Cg(I) = Plane number I (= ring number in () above)  - Alpha = Dihedral Angle between Planes I and J (Deg)  - Beta = Angle Cg(I)-->Cg(J) or Cg(I)-->Me vector and normal to plane I (Deg)  - Gamma = Angle Cg(I)-->Cg(J) vector and normal to plane J (Deg)  - Cg-Cg = Distance between ring Centroids (Ang.)  - CgI_Perp = Perpendicular distance of Cg(I) on ring J (Ang.)  - CgJ_Perp = Perpendicular distance of Cg(J) on ring I (Ang.)  - Slippage = Distance between Cg(I) and Perpendicular Projection of Cg(J) on Ring I (Ang).  - P,Q,R,S = J-Plane Parameters for Carth. Coord. (Xo, Yo, Zo) | | | | | | | | | | | | | | | | | | | | | | | | | | | | | | | | |
| --- | --- | --- | --- | --- | --- | --- | --- | --- | --- | --- | --- | --- | --- | --- | --- | --- | --- | --- | --- | --- | --- | --- | --- | --- | --- | --- | --- | --- | --- | --- | --- | --- |
|  | | | | | | | | | | | | | | | | | | | | | | | | | | | | | | | | |
| **Cg(I)** | **Cg(J)** | | | | **[ARU(J)]** | | | | **Cg-Cg** | | | | **Alpha** | | | | **Beta** | | | | **Gamma** | | | **CgI_Perp** | | | **CgJ_Perp** | | | **Slippage** | | |
| Cg1 | Cg3 | | | | [4455] | | | | 4,6474(19) | | | | 5,9586 | | | | 55,27(16) | | | | 21,2 | | | 40,4 | | | 3,5415(14) | | | 4,3340(13) | | |
| Cg1 | Cg4 | | | | [4455] | | | | 4,894(2) | | | | 6,0395 | | | | 55,48(16) | | | | 20,4 | | | 43,8 | | | 3,5321(14) | | | 4,5859(14) | | |
| Cg1 | Cg5 | | | | [1545] | | | | 5,5578(19) | | | | 16,9274 | | | | 29,48(16) | | | | 58,9 | | | 35,1 | | | 4,5479(14) | | | 2,8668(13) | | |
| Cg1 | Cg8 | | | | [1545] | | | | 4,670(2) | | | | 5,3417 | | | | 40,42(16) | | | | 58,4 | | | 28,6 | | | 4,0992(14) | | | 2,4485(14) | | |
| Cg1 | Cg9 | | | | [4455] | | | | 4,6085(17) | | | | 6,051 | | | | 55,33(13) | | | | 14,8 | | | 40,6 | | | 3,4971(14) | | | 4,4564(10) | | |
| Cg1 | Cg11 | | | | [1545] | | | | 4,3600(17) | | | | 5,4533 | | | | 39,85(13) | | | | 58 | | | 20,2 | | | 4,0905(13) | | | 2,3107(11) | | |
| Cg2 | Cg3 | | | | [4455] | | | | 5,0207(19) | | | | 5,9586 | | | | 42,12(16) | | | | 28,9 | | | 63 | | | 2,2812(15) | | | 4,3973(13) | | |
| Cg2 | Cg4 | | | | [3655] | | | | 5,870(2) | | | | 6,5576 | | | | 85,72(17) | | | | 25,4 | | | 79,8 | | | 1,0432(15) | | | 5,3041(14) | | |
| Cg2 | Cg9 | | | | [4455] | | | | 5,8962(18) | | | | 6,051 | | | | 41,71(14) | | | | 37,3 | | | 66,4 | | | 2,3633(15) | | | 4,6925(10) | | |
| Cg3 | Cg1 | | | | [4555] | | | | 4,6474(19) | | | | 22,2781 | | | | 55,27(16) | | | | 40,4 | | | 21,2 | | | 4,3340(13) | | | 3,5416(14) | | |
| Cg3 | Cg5 | | | | [1545] | | | | 5,863(2) | | | | 16,9274 | | | | 88,77(16) | | | | 36,4 | | | 76 | | | 1,4146(13) | | | 4,7177(14) | | |
| Cg3 | Cg6 | | | | [1545] | | | | 5,447(2) | | | | 16,7998 | | | | 88,39(16) | | | | 17,2 | | | 73,1 | | | 1,5866(13) | | | 5,2020(15) | | |
| Cg3 | Cg7 | | | | [4565] | | | | 5,676(2) | | | | 13,6137 | | | | 85,52(16) | | | | 17 | | | 74,7 | | | 1,4965(13) | | | 5,4276(14) | | |
| Cg3 | Cg8 | | | | [4565] | | | | 5,111(2) | | | | 13,3139 | | | | 84,39(16) | | | | 18,1 | | | 71,8 | | | 1,5959(13) | | | 4,8595(14) | | |
| Cg3 | Cg10 | | | | [1545] | | | | 5,5283(18) | | | | 16,9261 | | | | 88,58(13) | | | | 26,2 | | | 73,7 | | | 1,5491(13) | | | 4,9606(11) | | |
| Cg3 | Cg11 | | | | [4565] | | | | 5,2608(18) | | | | 13,4616 | | | | 84,96(13) | | | | 12,1 | | | 72,9 | | | 1,5496(13) | | | 5,1437(11) | | |
| Cg4 | Cg1 | | | | [4555] | | | | 4,894(2) | | | | 22,2781 | | | | 55,48(16) | | | | 43,8 | | | 20,4 | | | 4,5858(14) | | | 3,5322(14) | | |
| Cg4 | Cg7 | | | | [4565] | | | | 5,536(2) | | | | 13,6137 | | | | 85,23(16) | | | | 12 | | | 77 | | | 1,2414(14) | | | 5,4143(14) | | |
| Cg4 | Cg11 | | | | [4565] | | | | 5,6491(18) | | | | 13,4616 | | | | 84,67(14) | | | | 22,9 | | | 76,8 | | | 1,2929(14) | | | 5,2037(11) | | |
| Cg5 | Cg1 | | | | [1565] | | | | 5,5578(19) | | | | 13,3467 | | | | 29,48(16) | | | | 35,1 | | | 58,9 | | | 2,8667(13) | | | 4,5478(14) | | |
| Cg5 | Cg7 | | | | [4565] | | | | 3,5816(19) | | | | 13,6137 | | | | 4,86(15) | | | | 16,1 | | | 15,5 | | | 3,4507(14) | | | 3,4404(13) | | |
| Cg5 | Cg8 | | | | [4565] | | | | 3,868(2) | | | | 13,3139 | | | | 5,65(16) | | | | 23,4 | | | 27,2 | | | 3,4412(14) | | | 3,5508(14) | | |
| Cg5 | Cg11 | | | | [4565] | | | | 3,5209(17) | | | | 13,4616 | | | | 5,23(13) | | | | 6,9 | | | 12,1 | | | 3,4426(14) | | | 3,4951(11) | | |
| Cg6 | Cg7 | | | | [4565] | | | | 3,836(2) | | | | 13,6137 | | | | 8,24(16) | | | | 25,7 | | | 33,6 | | | 3,1929(14) | | | 3,4554(13) | | |
| Cg6 | Cg8 | | | | [4565] | | | | 5,259(2) | | | | 13,3139 | | | | 8,66(16) | | | | 44,7 | | | 52,9 | | | 3,1756(14) | | | 3,7403(14) | | |
| Cg6 | Cg11 | | | | [4565] | | | | 4,4365(18) | | | | 13,4616 | | | | 8,42(14) | | | | 35,8 | | | 44,2 | | | 3,1813(14) | | | 3,5974(11) | | |
| Cg7 | Cg1 | | | | [1565] | | | | 4,3808(19) | | | | 13,3467 | | | | 39,29(16) | | | | 21,5 | | | 60,3 | | | 2,1723(13) | | | 4,0746(14) | | |
| Cg7 | Cg5 | | | | [4465] | | | | 3,5815(19) | | | | 9,0312 | | | | 4,86(15) | | | | 15,5 | | | 16,1 | | | 3,4403(13) | | | 3,4507(14) | | |
| Cg7 | Cg6 | | | | [4465] | | | | 3,835(2) | | | | 9,3422 | | | | 8,24(16) | | | | 33,6 | | | 25,7 | | | 3,4553(13) | | | 3,1929(14) | | |
| Cg7 | Cg10 | | | | [4465] | | | | 3,4968(17) | | | | 9,2381 | | | | 6,39(13) | | | | 18,6 | | | 13,5 | | | 3,4000(13) | | | 3,3142(11) | | |
| Cg8 | Cg1 | | | | [1565] | | | | 4,670(2) | | | | 13,3467 | | | | 40,42(16) | | | | 28,6 | | | 58,4 | | | 2,4485(14) | | | 4,0992(14) | | |
| Cg8 | Cg2 | | | | [1565] | | | | 5,444(2) | | | | 11,5623 | | | | 55,74(17) | | | | 32,2 | | | 76,4 | | | 1,2836(14) | | | 4,6075(14) | | |
| Cg8 | Cg5 | | | | [4465] | | | | 3,869(2) | | | | 9,0312 | | | | 5,65(16) | | | | 27,2 | | | 23,4 | | | 3,5509(14) | | | 3,4412(14) | | |
| Cg8 | Cg6 | | | | [4465] | | | | 5,259(2) | | | | 9,3422 | | | | 8,66(16) | | | | 52,9 | | | 44,7 | | | 3,7403(14) | | | 3,1755(14) | | |
| Cg8 | Cg10 | | | | [4465] | | | | 4,4458(18) | | | | 9,2381 | | | | 6,97(14) | | | | 42,1 | | | 36 | | | 3,5955(14) | | | 3,3007(11) | | |
| Cg9 | Cg1 | | | | [4555] | | | | 4,6086(17) | | | | 22,2781 | | | | 55,33(13) | | | | 40,6 | | | 14,8 | | | 4,4565(10) | | | 3,4971(14) | | |
| Cg9 | Cg6 | | | | [1545] | | | | 5,8477(18) | | | | 16,7998 | | | | 88,51(14) | | | | 27,6 | | | 71,3 | | | 1,8750(11) | | | 5,1805(14) | | |
| Cg9 | Cg7 | | | | [4565] | | | | 5,4654(18) | | | | 13,6137 | | | | 85,40(13) | | | | 10,2 | | | 75,5 | | | 1,3682(11) | | | 5,3796(14) | | |
| Cg9 | Cg8 | | | | [4565] | | | | 5,4397(18) | | | | 13,3139 | | | | 84,27(14) | | | | 26 | | | 74,4 | | | 1,4663(11) | | | 4,8873(14) | | |
| Cg9 | Cg11 | | | | [4565] | | | | 5,3138(16) | | | | 13,4616 | | | | 84,84(10) | | | | 15 | | | 74,5 | | | 1,4204(11) | | | 5,1335(11) | | |
| Cg10 | Cg7 | | | | [4565] | | | | 3,4970(17) | | | | 13,6137 | | | | 6,39(13) | | | | 13,5 | | | 18,6 | | | 3,3143(11) | | | 3,4001(13) | | |
| Cg10 | Cg8 | | | | [4565] | | | | 4,4457(18) | | | | 13,3139 | | | | 6,97(14) | | | | 36 | | | 42,1 | | | 3,3008(11) | | | 3,5955(14) | | |
| Cg10 | Cg11 | | | | [4565] | | | | 3,8075(16) | | | | 13,4616 | | | | 6,65(10) | | | | 23,3 | | | 29,8 | | | 3,3044(11) | | | 3,4973(11) | | |
| Cg11 | Cg1 | | | | [1565] | | | | 4,3600(17) | | | | 13,3467 | | | | 39,85(13) | | | | 20,2 | | | 58 | | | 2,3106(11) | | | 4,0905(14) | | |
| Cg11 | Cg5 | | | | [4465] | | | | 3,5209(17) | | | | 9,0312 | | | | 5,23(13) | | | | 12,1 | | | 6,9 | | | 3,4952(11) | | | 3,4426(14) | | |
| Cg11 | Cg6 | | | | [4465] | | | | 4,4365(18) | | | | 9,3422 | | | | 8,42(14) | | | | 44,2 | | | 35,8 | | | 3,5974(11) | | | 3,1812(14) | | |
| Cg11 | Cg10 | | | | [4465] | | | | 3,8075(16) | | | | 9,2381 | | | | 6,65(10) | | | | 29,8 | | | 23,3 | | | 3,4973(11) | | | 3,3043(11) | | |
|  | | | | | | | | | | | | | | | | | | | | | | | | | | | | | | | | |
|  | | | | | | | | | | | | | | | | | | | | | | | | | | | | | | | | |
| [4455] | | | -1/2+X,-Y,Z | | | | | | |
| [1545] | | | X,-1+Y,Z | | | | | | |
| [3655] | | | 3/2-X,Y,1/2+Z | | | | | | |
| [4555] | | | 1/2+X,-Y,Z | | | | | | |
| [4565] | | | 1/2+X,1-Y,Z | | | | | | |
| [1565] | | | X,1+Y,Z | | | | | | |
| [4465] | | | -1/2+X,1-Y,Z | | | | | | |
| [4465] | | | -1/2+X,1-Y,Z | | | | | | |
| [1545] | | | X,-1+Y,Z | | | | | | |
|  | | | | | | | | | | | | | | | | | | | | | | | | | | | | | | | | |
| **Analysis of X-H...Cg(Pi-Ring) Interactions (H..Cg < 3.0 Ang. - Gamma < 40.0 Deg)**  - Cg(J) = Center of gravity of ring J (Plane number above)  - H-Perp = Perpendicular distance of H to ring plane J  - Gamma = Angle between Cg-H vector and ring J normal  - X-H..Cg = X-H-Cg angle (degrees)  - X..Cg = Distance of X to Cg (Angstrom)  - X-H, Pi = Angle of the X-H bond with the Pi-plane (i.e.' Perpendicular = 90 degrees, Parallel = 0 degrees) | | | | | | | | | | | | | | | | | | | | | | | | | | | | | | | | |
|  | | | | | | | | | | | | | | | | | | | | | | | | | | | | | | | | |
| **X--H(I)** | | | | **Cg(J)** | | | **[ARU(J)]** | | | | **H..Cg** | | | **H-Perp** | | | | **Gamma** | | | | **X-H..Cg** | | | **X..Cg** | | | **X-H,Pi** | | |
| C39-H39 | | | | Cg3 | | | [4465] | | | | 2,98 | | | 2,59 | | | | 29,81 | | | | 147 | | | 3,816(4) | | | 76 | | |
| C45-H45 | | | | Cg7 | | | [1545] | | | | 2,75 | | | 2,73 | | | | 7,78 | | | | 118 | | | 3,306(4) | | | 34 | | |
|  | | | | | | | | | | | | | | | | | | | | | | | | | | | | | | | | |
| **Analysis of Y-X...Cg(Pi-Ring) Interactions (X..Cg < 4.0 Ang. - Gamma < 30.0 Deg)** | | | | | | | | | | | | | | | | | | | | | | | | | | | | | | | | |
|  | | | | | | | | | | | | | | | | | | | | | | | | | | | | | | | | |
| **Y--X(I)** | | | **Cg(J)** | | | **[ARU(J)]** | | | | | | **X..Cg** | | | | **X-Perp** | | | **Gamma** | | | | **Y-X..Cg** | | | **Y..Cg** | | | **Y-X,Pi** | | |
| C1-F1 | | | Cg1 | | | [1555,01] | | | | | | 3,845(3) | | | | 3,395 | | | 28,01 | | | | 99,4(2) | | | 4,268(4) | | | 35,42 | | |
| C1-F2 | | | Cg4 | | | [3655,01] | | | | | | 3,043(3) | | | | -3,042 | | | 0,99 | | | | 127,9(2) | | | 4,002(4) | | | 37,16 | | |
| C1-F2 | | | Cg9 | | | [3655,01] | | | | | | 3,335(2) | | | | -3,045 | | | 24,07 | | | | 145,7(2) | | | 4,498(4) | | | 35,53 | | |
| C29-F7 | | | Cg2 | | | [2654,01] | | | | | | 3,514(3) | | | | 3,141 | | | 26,64 | | | | 136,4(2) | | | 4,575(4) | | | 20,75 | | |
|  | | | | | | | | | | | | | | | | | | | | | | | | | | | | | | | | |
|  | | | | | | | | | | | | | | | | | | | | | | | | | | | | | | | | |
| [1555] | | X,Y,Z | | | | | | | |
| [3655] | | 3/2-X,Y,1/2+Z | | | | | | | |
| [2654] | | 1-X,-Y,-1/2+Z | | | | | | | |
|  | | | | | | | | | | | | | | | | | | | | | | | | | | | | | | | | |
| The Cg(I) refer to the Ring Centre-of-Gravity numbers given in () in the Ring-Analysis above. | | | | | | | | | | | | | | | | | | | | | | | | | | | | | | | | |
|  | | | | | | | | | | | | | | | | | | | | | | | | | | | | | | | | |
|  | | | | | | | | | | | | | | | | | | | | | | | | | | | | | | | | |
| **Cg(I)** | | | **x** | | | | | **y** | | | | | | | **z** | | | | |
| Cg1 | | | 0,49760(7) | | | | | -0,16652(12) | | | | | | | 0,50871(7) | | | | |
| Cg2 | | | 0,39733(7) | | | | | 0,04632(12) | | | | | | | 0,64563(7) | | | | |
| Cg3 | | | 0,80926(6) | | | | | 0,01345(12) | | | | | | | 0,40896(7) | | | | |
| Cg4 | | | 0,85999(7) | | | | | 0,09638(12) | | | | | | | 0,30771(7) | | | | |
| Cg5 | | | 0,70780(6) | | | | | 0,55460(12) | | | | | | | 0,43904(7) | | | | |
| Cg6 | | | 0,76875(7) | | | | | 0,57890(12) | | | | | | | 0,33255(7) | | | | |
| Cg7 | | | 0,37181(6) | | | | | 0,53707(12) | | | | | | | 0,48102(7) | | | | |
| Cg8 | | | 0,30326(7) | | | | | 0,64003(12) | | | | | | | 0,56274(7) | | | | |
| Cg9 | | | 0,83470(5) | | | | | 0,05535(9) | | | | | | | 0,35851(5) | | | | |
| Cg10 | | | 0,73855(5) | | | | | 0,56637(9) | | | | | | | 0,38593(6) | | | | |
| Cg11 | | | 0,33752(5) | | | | | 0,58852(9) | | | | | | | 0,52187(6) | | | | |
|  | | | | | | | | | | | | | | | | | | | | | | | | | | | | | | | | |
